# Supplementary material
Source: PubMed Central journal article supplement (PMC6416713)
Supplement: ct8b01265_si_001.pdf [file ct8b01265_si_001.pdf]

**Supporting information for:**  
**Semiempirical Quantum-Chemical Methods with**  
**Orthogonalization and Dispersion Corrections**

Pavlo O. Dral,\* Xin Wu, and Walter Thiel\*

*Max-Planck-Institut für Kohlenforschung, Kaiser-Wilhelm-Platz 1,  
45470 Mülheim an der Ruhr*

E-mail: dral@kofo.mpg.de; thiel@kofo.mpg.de

# Contents

|                                                                                                              |             |
|--------------------------------------------------------------------------------------------------------------|-------------|
| List of Figures                                                                                              | S2          |
| List of Tables                                                                                               | S11         |
| <b>1 Parametrization Details</b>                                                                             | <b>S18</b>  |
| <b>2 Plots of Resonance Integrals</b>                                                                        | <b>S25</b>  |
| 2.1 ODM2 vs OM2 . . . . .                                                                                    | S25         |
| 2.2 ODM3 vs OM3 . . . . .                                                                                    | S80         |
| <b>3 Tables with Additional Validation Results</b>                                                           | <b>S135</b> |
| <b>4 Tables with Reference and Calculated Property Values for Individual Molecules<br/>in Benchmark Sets</b> | <b>S141</b> |
| References                                                                                                   | S399        |

## List of Figures

|                                                                                                                                           |     |
|-------------------------------------------------------------------------------------------------------------------------------------------|-----|
| S1 Comparison of $ss$ local resonance integrals for the H–H pair calculated using standard OM2 and new ODM2 parameters. . . . .           | S25 |
| S2 Comparison of $ss$ local resonance integrals for the C–C pair calculated using standard OM2 and new ODM2 parameters. . . . .           | S26 |
| S3 Comparison of $s\sigma$ local resonance integrals for the C–C pair calculated using standard OM2 and new ODM2 parameters. . . . .      | S27 |
| S4 Comparison of $\sigma\sigma$ local resonance integrals for the C–C pair calculated using standard OM2 and new ODM2 parameters. . . . . | S28 |
| S5 Comparison of $\pi\pi$ local resonance integrals for the C–C pair calculated using standard OM2 and new ODM2 parameters. . . . .       | S29 |

|     |                                                                                                                                        |     |
|-----|----------------------------------------------------------------------------------------------------------------------------------------|-----|
| S6  | Comparison of $ss$ local resonance integrals for the C–H pair calculated using standard OM2 and new ODM2 parameters. . . . .           | S30 |
| S7  | Comparison of $\sigma s$ local resonance integrals for the C–H pair calculated using standard OM2 and new ODM2 parameters. . . . .     | S31 |
| S8  | Comparison of $ss$ local resonance integrals for the N–N pair calculated using standard OM2 and new ODM2 parameters. . . . .           | S32 |
| S9  | Comparison of $s\sigma$ local resonance integrals for the N–N pair calculated using standard OM2 and new ODM2 parameters. . . . .      | S33 |
| S10 | Comparison of $\sigma\sigma$ local resonance integrals for the N–N pair calculated using standard OM2 and new ODM2 parameters. . . . . | S34 |
| S11 | Comparison of $\pi\pi$ local resonance integrals for the N–N pair calculated using standard OM2 and new ODM2 parameters. . . . .       | S35 |
| S12 | Comparison of $ss$ local resonance integrals for the N–H pair calculated using standard OM2 and new ODM2 parameters. . . . .           | S36 |
| S13 | Comparison of $\sigma s$ local resonance integrals for the N–H pair calculated using standard OM2 and new ODM2 parameters. . . . .     | S37 |
| S14 | Comparison of $ss$ local resonance integrals for the N–C pair calculated using standard OM2 and new ODM2 parameters. . . . .           | S38 |
| S15 | Comparison of $s\sigma$ local resonance integrals for the N–C pair calculated using standard OM2 and new ODM2 parameters. . . . .      | S39 |
| S16 | Comparison of $\sigma s$ local resonance integrals for the N–C pair calculated using standard OM2 and new ODM2 parameters. . . . .     | S40 |
| S17 | Comparison of $\sigma\sigma$ local resonance integrals for the N–C pair calculated using standard OM2 and new ODM2 parameters. . . . . | S41 |
| S18 | Comparison of $\pi\pi$ local resonance integrals for the N–C pair calculated using standard OM2 and new ODM2 parameters. . . . .       | S42 |

|     |                                                                                                                                        |     |
|-----|----------------------------------------------------------------------------------------------------------------------------------------|-----|
| S19 | Comparison of $ss$ local resonance integrals for the O–O pair calculated using standard OM2 and new ODM2 parameters. . . . .           | S43 |
| S20 | Comparison of $s\sigma$ local resonance integrals for the O–O pair calculated using standard OM2 and new ODM2 parameters. . . . .      | S44 |
| S21 | Comparison of $\sigma\sigma$ local resonance integrals for the O–O pair calculated using standard OM2 and new ODM2 parameters. . . . . | S45 |
| S22 | Comparison of $\pi\pi$ local resonance integrals for the O–O pair calculated using standard OM2 and new ODM2 parameters. . . . .       | S46 |
| S23 | Comparison of $ss$ local resonance integrals for the O–H pair calculated using standard OM2 and new ODM2 parameters. . . . .           | S47 |
| S24 | Comparison of $\sigma s$ local resonance integrals for the O–H pair calculated using standard OM2 and new ODM2 parameters. . . . .     | S48 |
| S25 | Comparison of $ss$ local resonance integrals for the O–C pair calculated using standard OM2 and new ODM2 parameters. . . . .           | S49 |
| S26 | Comparison of $s\sigma$ local resonance integrals for the O–C pair calculated using standard OM2 and new ODM2 parameters. . . . .      | S50 |
| S27 | Comparison of $\sigma s$ local resonance integrals for the O–C pair calculated using standard OM2 and new ODM2 parameters. . . . .     | S51 |
| S28 | Comparison of $\sigma\sigma$ local resonance integrals for the O–C pair calculated using standard OM2 and new ODM2 parameters. . . . . | S52 |
| S29 | Comparison of $\pi\pi$ local resonance integrals for the O–C pair calculated using standard OM2 and new ODM2 parameters. . . . .       | S53 |
| S30 | Comparison of $ss$ local resonance integrals for the O–N pair calculated using standard OM2 and new ODM2 parameters. . . . .           | S54 |
| S31 | Comparison of $s\sigma$ local resonance integrals for the O–N pair calculated using standard OM2 and new ODM2 parameters. . . . .      | S55 |

|     |                                                                                                                                        |     |
|-----|----------------------------------------------------------------------------------------------------------------------------------------|-----|
| S32 | Comparison of $\sigma s$ local resonance integrals for the O–N pair calculated using standard OM2 and new ODM2 parameters. . . . .     | S56 |
| S33 | Comparison of $\sigma\sigma$ local resonance integrals for the O–N pair calculated using standard OM2 and new ODM2 parameters. . . . . | S57 |
| S34 | Comparison of $\pi\pi$ local resonance integrals for the O–N pair calculated using standard OM2 and new ODM2 parameters. . . . .       | S58 |
| S35 | Comparison of $ss$ local resonance integrals for the F–F pair calculated using standard OM2 and new ODM2 parameters. . . . .           | S59 |
| S36 | Comparison of $s\sigma$ local resonance integrals for the F–F pair calculated using standard OM2 and new ODM2 parameters. . . . .      | S60 |
| S37 | Comparison of $\sigma\sigma$ local resonance integrals for the F–F pair calculated using standard OM2 and new ODM2 parameters. . . . . | S61 |
| S38 | Comparison of $\pi\pi$ local resonance integrals for the F–F pair calculated using standard OM2 and new ODM2 parameters. . . . .       | S62 |
| S39 | Comparison of $ss$ local resonance integrals for the F–H pair calculated using standard OM2 and new ODM2 parameters. . . . .           | S63 |
| S40 | Comparison of $\sigma s$ local resonance integrals for the F–H pair calculated using standard OM2 and new ODM2 parameters. . . . .     | S64 |
| S41 | Comparison of $ss$ local resonance integrals for the F–C pair calculated using standard OM2 and new ODM2 parameters. . . . .           | S65 |
| S42 | Comparison of $s\sigma$ local resonance integrals for the F–C pair calculated using standard OM2 and new ODM2 parameters. . . . .      | S66 |
| S43 | Comparison of $\sigma s$ local resonance integrals for the F–C pair calculated using standard OM2 and new ODM2 parameters. . . . .     | S67 |
| S44 | Comparison of $\sigma\sigma$ local resonance integrals for the F–C pair calculated using standard OM2 and new ODM2 parameters. . . . . | S68 |

|     |                                                                                                                                        |     |
|-----|----------------------------------------------------------------------------------------------------------------------------------------|-----|
| S45 | Comparison of $\pi\pi$ local resonance integrals for the F–C pair calculated using standard OM2 and new ODM2 parameters. . . . .       | S69 |
| S46 | Comparison of $ss$ local resonance integrals for the F–N pair calculated using standard OM2 and new ODM2 parameters. . . . .           | S70 |
| S47 | Comparison of $s\sigma$ local resonance integrals for the F–N pair calculated using standard OM2 and new ODM2 parameters. . . . .      | S71 |
| S48 | Comparison of $\sigma s$ local resonance integrals for the F–N pair calculated using standard OM2 and new ODM2 parameters. . . . .     | S72 |
| S49 | Comparison of $\sigma\sigma$ local resonance integrals for the F–N pair calculated using standard OM2 and new ODM2 parameters. . . . . | S73 |
| S50 | Comparison of $\pi\pi$ local resonance integrals for the F–N pair calculated using standard OM2 and new ODM2 parameters. . . . .       | S74 |
| S51 | Comparison of $ss$ local resonance integrals for the F–O pair calculated using standard OM2 and new ODM2 parameters. . . . .           | S75 |
| S52 | Comparison of $s\sigma$ local resonance integrals for the F–O pair calculated using standard OM2 and new ODM2 parameters. . . . .      | S76 |
| S53 | Comparison of $\sigma s$ local resonance integrals for the F–O pair calculated using standard OM2 and new ODM2 parameters. . . . .     | S77 |
| S54 | Comparison of $\sigma\sigma$ local resonance integrals for the F–O pair calculated using standard OM2 and new ODM2 parameters. . . . . | S78 |
| S55 | Comparison of $\pi\pi$ local resonance integrals for the F–O pair calculated using standard OM2 and new ODM2 parameters. . . . .       | S79 |
| S56 | Comparison of $ss$ local resonance integrals for the H–H pair calculated using standard OM3 and new ODM3 parameters. . . . .           | S80 |
| S57 | Comparison of $ss$ local resonance integrals for the C–C pair calculated using standard OM3 and new ODM3 parameters. . . . .           | S81 |

|     |                                                                                                                                        |     |
|-----|----------------------------------------------------------------------------------------------------------------------------------------|-----|
| S58 | Comparison of $s\sigma$ local resonance integrals for the C–C pair calculated using standard OM3 and new ODM3 parameters. . . . .      | S82 |
| S59 | Comparison of $\sigma\sigma$ local resonance integrals for the C–C pair calculated using standard OM3 and new ODM3 parameters. . . . . | S83 |
| S60 | Comparison of $\pi\pi$ local resonance integrals for the C–C pair calculated using standard OM3 and new ODM3 parameters. . . . .       | S84 |
| S61 | Comparison of $ss$ local resonance integrals for the C–H pair calculated using standard OM3 and new ODM3 parameters. . . . .           | S85 |
| S62 | Comparison of $\sigma s$ local resonance integrals for the C–H pair calculated using standard OM3 and new ODM3 parameters. . . . .     | S86 |
| S63 | Comparison of $ss$ local resonance integrals for the N–N pair calculated using standard OM3 and new ODM3 parameters. . . . .           | S87 |
| S64 | Comparison of $s\sigma$ local resonance integrals for the N–N pair calculated using standard OM3 and new ODM3 parameters. . . . .      | S88 |
| S65 | Comparison of $\sigma\sigma$ local resonance integrals for the N–N pair calculated using standard OM3 and new ODM3 parameters. . . . . | S89 |
| S66 | Comparison of $\pi\pi$ local resonance integrals for the N–N pair calculated using standard OM3 and new ODM3 parameters. . . . .       | S90 |
| S67 | Comparison of $ss$ local resonance integrals for the N–H pair calculated using standard OM3 and new ODM3 parameters. . . . .           | S91 |
| S68 | Comparison of $\sigma s$ local resonance integrals for the N–H pair calculated using standard OM3 and new ODM3 parameters. . . . .     | S92 |
| S69 | Comparison of $ss$ local resonance integrals for the N–C pair calculated using standard OM3 and new ODM3 parameters. . . . .           | S93 |
| S70 | Comparison of $s\sigma$ local resonance integrals for the N–C pair calculated using standard OM3 and new ODM3 parameters. . . . .      | S94 |

|     |                                                                                                                                        |      |
|-----|----------------------------------------------------------------------------------------------------------------------------------------|------|
| S71 | Comparison of $\sigma s$ local resonance integrals for the N–C pair calculated using standard OM3 and new ODM3 parameters. . . . .     | S95  |
| S72 | Comparison of $\sigma\sigma$ local resonance integrals for the N–C pair calculated using standard OM3 and new ODM3 parameters. . . . . | S96  |
| S73 | Comparison of $\pi\pi$ local resonance integrals for the N–C pair calculated using standard OM3 and new ODM3 parameters. . . . .       | S97  |
| S74 | Comparison of $ss$ local resonance integrals for the O–O pair calculated using standard OM3 and new ODM3 parameters. . . . .           | S98  |
| S75 | Comparison of $s\sigma$ local resonance integrals for the O–O pair calculated using standard OM3 and new ODM3 parameters. . . . .      | S99  |
| S76 | Comparison of $\sigma\sigma$ local resonance integrals for the O–O pair calculated using standard OM3 and new ODM3 parameters. . . . . | S100 |
| S77 | Comparison of $\pi\pi$ local resonance integrals for the O–O pair calculated using standard OM3 and new ODM3 parameters. . . . .       | S101 |
| S78 | Comparison of $ss$ local resonance integrals for the O–H pair calculated using standard OM3 and new ODM3 parameters. . . . .           | S102 |
| S79 | Comparison of $\sigma s$ local resonance integrals for the O–H pair calculated using standard OM3 and new ODM3 parameters. . . . .     | S103 |
| S80 | Comparison of $ss$ local resonance integrals for the O–C pair calculated using standard OM3 and new ODM3 parameters. . . . .           | S104 |
| S81 | Comparison of $s\sigma$ local resonance integrals for the O–C pair calculated using standard OM3 and new ODM3 parameters. . . . .      | S105 |
| S82 | Comparison of $\sigma s$ local resonance integrals for the O–C pair calculated using standard OM3 and new ODM3 parameters. . . . .     | S106 |
| S83 | Comparison of $\sigma\sigma$ local resonance integrals for the O–C pair calculated using standard OM3 and new ODM3 parameters. . . . . | S107 |



|     |                                                                                                                                        |      |
|-----|----------------------------------------------------------------------------------------------------------------------------------------|------|
| S84 | Comparison of $\pi\pi$ local resonance integrals for the O–C pair calculated using standard OM3 and new ODM3 parameters. . . . .       | S108 |
| S85 | Comparison of $ss$ local resonance integrals for the O–N pair calculated using standard OM3 and new ODM3 parameters. . . . .           | S109 |
| S86 | Comparison of $s\sigma$ local resonance integrals for the O–N pair calculated using standard OM3 and new ODM3 parameters. . . . .      | S110 |
| S87 | Comparison of $\sigma s$ local resonance integrals for the O–N pair calculated using standard OM3 and new ODM3 parameters. . . . .     | S111 |
| S88 | Comparison of $\sigma\sigma$ local resonance integrals for the O–N pair calculated using standard OM3 and new ODM3 parameters. . . . . | S112 |
| S89 | Comparison of $\pi\pi$ local resonance integrals for the O–N pair calculated using standard OM3 and new ODM3 parameters. . . . .       | S113 |
| S90 | Comparison of $ss$ local resonance integrals for the F–F pair calculated using standard OM3 and new ODM3 parameters. . . . .           | S114 |
| S91 | Comparison of $s\sigma$ local resonance integrals for the F–F pair calculated using standard OM3 and new ODM3 parameters. . . . .      | S115 |
| S92 | Comparison of $\sigma\sigma$ local resonance integrals for the F–F pair calculated using standard OM3 and new ODM3 parameters. . . . . | S116 |
| S93 | Comparison of $\pi\pi$ local resonance integrals for the F–F pair calculated using standard OM3 and new ODM3 parameters. . . . .       | S117 |
| S94 | Comparison of $ss$ local resonance integrals for the F–H pair calculated using standard OM3 and new ODM3 parameters. . . . .           | S118 |
| S95 | Comparison of $\sigma s$ local resonance integrals for the F–H pair calculated using standard OM3 and new ODM3 parameters. . . . .     | S119 |
| S96 | Comparison of $ss$ local resonance integrals for the F–C pair calculated using standard OM3 and new ODM3 parameters. . . . .           | S120 |

|      |                                                                                                                                        |      |
|------|----------------------------------------------------------------------------------------------------------------------------------------|------|
| S97  | Comparison of $s\sigma$ local resonance integrals for the F–C pair calculated using standard OM3 and new ODM3 parameters. . . . .      | S121 |
| S98  | Comparison of $\sigma s$ local resonance integrals for the F–C pair calculated using standard OM3 and new ODM3 parameters. . . . .     | S122 |
| S99  | Comparison of $\sigma\sigma$ local resonance integrals for the F–C pair calculated using standard OM3 and new ODM3 parameters. . . . . | S123 |
| S100 | Comparison of $\pi\pi$ local resonance integrals for the F–C pair calculated using standard OM3 and new ODM3 parameters. . . . .       | S124 |
| S101 | Comparison of $ss$ local resonance integrals for the F–N pair calculated using standard OM3 and new ODM3 parameters. . . . .           | S125 |
| S102 | Comparison of $s\sigma$ local resonance integrals for the F–N pair calculated using standard OM3 and new ODM3 parameters. . . . .      | S126 |
| S103 | Comparison of $\sigma s$ local resonance integrals for the F–N pair calculated using standard OM3 and new ODM3 parameters. . . . .     | S127 |
| S104 | Comparison of $\sigma\sigma$ local resonance integrals for the F–N pair calculated using standard OM3 and new ODM3 parameters. . . . . | S128 |
| S105 | Comparison of $\pi\pi$ local resonance integrals for the F–N pair calculated using standard OM3 and new ODM3 parameters. . . . .       | S129 |
| S106 | Comparison of $ss$ local resonance integrals for the F–O pair calculated using standard OM3 and new ODM3 parameters. . . . .           | S130 |
| S107 | Comparison of $s\sigma$ local resonance integrals for the F–O pair calculated using standard OM3 and new ODM3 parameters. . . . .      | S131 |
| S108 | Comparison of $\sigma s$ local resonance integrals for the F–O pair calculated using standard OM3 and new ODM3 parameters. . . . .     | S132 |
| S109 | Comparison of $\sigma\sigma$ local resonance integrals for the F–O pair calculated using standard OM3 and new ODM3 parameters. . . . . | S133 |

|      |                                                                                                                                  |      |
|------|----------------------------------------------------------------------------------------------------------------------------------|------|
| S110 | Comparison of $\pi\pi$ local resonance integrals for the F–O pair calculated using standard OM3 and new ODM3 parameters. . . . . | S134 |
|------|----------------------------------------------------------------------------------------------------------------------------------|------|

## List of Tables

|     |                                                                                                                                                                                                                                                                 |      |
|-----|-----------------------------------------------------------------------------------------------------------------------------------------------------------------------------------------------------------------------------------------------------------------|------|
| S1  | Mean Absolute Errors in Heats of Formation (kcal/mol), Bond Lengths (Å), Bond Angles (degree), Ionization Potentials (eV), and Dipole Moments (D) Calculated with the OM $x$ , OM $x$ -D3T, and ODM $x$ Methods for the PDDG Set and Its Subsets . . . . .      | S136 |
| S2  | Mean Absolute Errors in Heats of Formation (kcal/mol), Bond Lengths (Å), Bond Angles (degree), Ionization Potentials (eV), and Dipole Moments (D) Calculated with the OM $x$ , OM $x$ -D3T, and ODM $x$ Methods for the PM7-CHNOF Set and Its Subsets . . . . . | S137 |
| S3  | Mean Absolute Errors in Atomization Enthalpies at 298 K (kcal/mol) Calculated with the OM $x$ , OM $x$ -D3T, and ODM $x$ Methods for the C7H10O2 Set . . . . .                                                                                                  | S138 |
| S4  | Mean Absolute Errors in Interaction Energies (kcal/mol) for the X40 $\times$ 10-CHNOF Set and Its Subsets at the Reference Geometries as Calculated with the OM $x$ , OM $x$ -D3T, and ODM $x$ Methods . . . . .                                                | S139 |
| S5  | Mean Absolute Errors in Bond Lengths (Å) and Bond Angles (degree) Calculated with the OM $x$ /MRCI, OM $x$ -D3T/MRCI, and ODM $x$ /MRCI Methods for the ExGeom Set and Its Subsets Relative to the CC2 Level of Theory . .                                      | S140 |
| S6  | Benchmark Results for the CHNO Set. Heats of Formation (kcal/mol) . . . .                                                                                                                                                                                       | S141 |
| S7  | Benchmark Results for the CHNO Set. Ionization Potentials (eV) . . . . .                                                                                                                                                                                        | S144 |
| S8  | Benchmark Results for the CHNO Set. Enthalpy Changes at 298 K (kcal/mol)                                                                                                                                                                                        | S145 |
| S9  | Benchmark Results for the CHNO Set. Activation Enthalpies (kcal/mol) . .                                                                                                                                                                                        | S146 |
| S10 | Benchmark Results for the FLUOR Set. Heats of Formation (kcal/mol) . . .                                                                                                                                                                                        | S148 |

|     |                                                                                                                        |      |
|-----|------------------------------------------------------------------------------------------------------------------------|------|
| S11 | Benchmark Results for the FLUOR Set. Ionization Potentials (eV) . . . . .                                              | S149 |
| S12 | Benchmark Results for the RADICALS71 Subset of the OVS7-CHNOF Set.<br>Heats of Formation (kcal/mol) . . . . .          | S150 |
| S13 | Benchmark Results for the RADICALS71 Subset of the OVS7-CHNOF Set.<br>Ionization Potentials (eV) . . . . .             | S151 |
| S14 | Benchmark Results for the RADICALS71 Subset of the OVS7-CHNOF Set.<br>Enthalpy Changes at 298 K (kcal/mol) . . . . .   | S152 |
| S15 | Benchmark Results for the ANIONS24 Subset of the OVS7-CHNOF Set.<br>Heats of Formation (kcal/mol) . . . . .            | S153 |
| S16 | Benchmark Results for the CATIONS41 Subset of the OVS7-CHNOF Set.<br>Heats of Formation (kcal/mol) . . . . .           | S154 |
| S17 | Benchmark Results for the CATIONS41 Subset of the OVS7-CHNOF Set.<br>Enthalpy Changes at 298 K (kcal/mol) . . . . .    | S155 |
| S18 | Benchmark Results for the BIGMOL20 Subset of the OVS7-CHNOF Set.<br>Heats of Formation (kcal/mol) . . . . .            | S156 |
| S19 | Benchmark Results for the ISOMERS44 Subset of the OVS7-CHNOF Set.<br>Heats of Formation (kcal/mol) . . . . .           | S157 |
| S20 | Benchmark Results for the ISOMERS44 Subset of the OVS7-CHNOF Set.<br>Enthalpy Changes at 298 K (kcal/mol) . . . . .    | S158 |
| S21 | Benchmark Results for the CONFORMERS30 Subset of the OVS7-CHNOF<br>Set. Heats of Formation (kcal/mol) . . . . .        | S159 |
| S22 | Benchmark Results for the CONFORMERS30 Subset of the OVS7-CHNOF<br>Set. Enthalpy Changes at 298 K (kcal/mol) . . . . . | S160 |
| S23 | Benchmark Results for the FLUORINE91 Subset of the OVS7-CHNOF Set.<br>Heats of Formation (kcal/mol) . . . . .          | S161 |
| S24 | Benchmark Results for the G2 Subset of the G2G3-CHNOF Set. Heats of<br>Formation (kcal/mol) . . . . .                  | S163 |

|     |                                                                                                                                                                                                                  |      |
|-----|------------------------------------------------------------------------------------------------------------------------------------------------------------------------------------------------------------------|------|
| S25 | Benchmark Results for the G3 Subset of the G2G3-CHNOF Set. Heats of Formation (kcal/mol) . . . . .                                                                                                               | S165 |
| S26 | Benchmark Results for the ALKANES28 Subset of the G2G3-CHNOF Set. Heats of Formation (kcal/mol) . . . . .                                                                                                        | S166 |
| S27 | Benchmark Results for the ALKANES28 Subset of the G2G3-CHNOF Set. Enthalpy Changes at 298 K (kcal/mol) . . . . .                                                                                                 | S167 |
| S28 | Benchmark Results for the TAE140 Subset of the W4-11-CHNOF Set. Atomization Energies at 0 K (kcal/mol) . . . . .                                                                                                 | S168 |
| S29 | Benchmark Results for the BDE99 Subset of the W4-11-CHNOF Set. Reaction Energies (kcal/mol) . . . . .                                                                                                            | S171 |
| S30 | Benchmark Results for the HAT707 Subset of the W4-11-CHNOF Set. Reaction Energies (kcal/mol) . . . . .                                                                                                           | S174 |
| S31 | Benchmark Results for the ISOMER20 Subset of the W4-11-CHNOF Set. Reaction Energies (kcal/mol) . . . . .                                                                                                         | S187 |
| S32 | Benchmark Results for the SN13 Subset of the W4-11-CHNOF Set. Reaction Energies (kcal/mol) . . . . .                                                                                                             | S188 |
| S33 | Benchmark Results for the MB08–165 Subset of the GMTKN30-CHNOF Set. Reaction Energies (kcal/mol) . . . . .                                                                                                       | S189 |
| S34 | Benchmark Results for the W4–08 Subset of the GMTKN30-CHNOF Set. Atomization Energies at 0 K (kcal/mol). The $OM_x$ and $OM_x$ -D3T Energies Are Corrected by Excluding ZPVE and Thermal Contributions . . . . . | S190 |
| S35 | Benchmark Results for the G21IP Subset of the GMTKN30-CHNOF Set. Ionization Energies (kcal/mol) . . . . .                                                                                                        | S191 |
| S36 | Benchmark Results for the G21EA Subset of the GMTKN30-CHNOF Set. Electron Affinities (kcal/mol) . . . . .                                                                                                        | S192 |
| S37 | Benchmark Results for the PA Subset of the GMTKN30-CHNOF Set. Proton Affinities (kcal/mol) . . . . .                                                                                                             | S193 |

|     |                                                                                                                 |      |
|-----|-----------------------------------------------------------------------------------------------------------------|------|
| S38 | Benchmark Results for the SIE11 Subset of the GMTKN30-CHNOF Set. Reaction Energies (kcal/mol) . . . . .         | S194 |
| S39 | Benchmark Results for the BHPERI Subset of the GMTKN30-CHNOF Set. Barriers at 0 K (kcal/mol) . . . . .          | S195 |
| S40 | Benchmark Results for the BH76 Subset of the GMTKN30-CHNOF Set. Barriers at 0 K (kcal/mol) . . . . .            | S196 |
| S41 | Benchmark Results for the BH76RC Subset of the GMTKN30-CHNOF Set. Reaction Energies (kcal/mol) . . . . .        | S197 |
| S42 | Benchmark Results for the RSE43 Subset of the GMTKN30-CHNOF Set. Reaction Energies (kcal/mol) . . . . .         | S198 |
| S43 | Benchmark Results for the O3ADD6 Subset of the GMTKN30-CHNOF Set. Relative Energies at 0 K (kcal/mol) . . . . . | S199 |
| S44 | Benchmark Results for the G2RC Subset of the GMTKN30-CHNOF Set. Reaction Energies (kcal/mol) . . . . .          | S200 |
| S45 | Benchmark Results for the ISO34 Subset of the GMTKN30-CHNOF Set. Relative Energies at 0 K (kcal/mol) . . . . .  | S201 |
| S46 | Benchmark Results for the ISOL22 Subset of the GMTKN30-CHNOF Set. Relative Energies at 0 K (kcal/mol) . . . . . | S202 |
| S47 | Benchmark Results for the DC9 Subset of the GMTKN30-CHNOF Set. Relative Energies at 0 K (kcal/mol) . . . . .    | S203 |
| S48 | Benchmark Results for the DARC Subset of the GMTKN30-CHNOF Set. Relative Energies at 0 K (kcal/mol) . . . . .   | S204 |
| S49 | Benchmark Results for the BSR36 Subset of the GMTKN30-CHNOF Set. Reaction Energies (kcal/mol) . . . . .         | S205 |
| S50 | Benchmark Results for the IDISP Subset of the GMTKN30-CHNOF Set. Reaction Energies (kcal/mol) . . . . .         | S207 |

|     |                                                                                                                                                                                                                           |      |
|-----|---------------------------------------------------------------------------------------------------------------------------------------------------------------------------------------------------------------------------|------|
| S51 | Benchmark Results for the WATER27 Subset of the GMTKN30-CHNOF Set.<br>Reaction Energies (kcal/mol) . . . . .                                                                                                              | S208 |
| S52 | Benchmark Results for the S22 Subset of the GMTKN30-CHNOF Set. Dis-<br>sociation Energies (kcal/mol) . . . . .                                                                                                            | S209 |
| S53 | Benchmark Results for the ADIM6 Subset of the GMTKN30-CHNOF Set.<br>Dissociation Energies (kcal/mol) . . . . .                                                                                                            | S210 |
| S54 | Benchmark Results for the PCONF Subset of the GMTKN30-CHNOF Set.<br>Relative Energies at 0 K (kcal/mol) . . . . .                                                                                                         | S211 |
| S55 | Benchmark Results for the ACONF Subset of the GMTKN30-CHNOF Set.<br>Relative Energies at 0 K (kcal/mol) . . . . .                                                                                                         | S212 |
| S56 | Benchmark Results for the SCONF Subset of the GMTKN30-CHNOF Set.<br>Relative Energies at 0 K (kcal/mol) . . . . .                                                                                                         | S213 |
| S57 | Benchmark Results for the MGAE109/11 Subset of the CE345-CHNOF Set.<br>Atomization Energies at 0 K (kcal/mol). The $OM_x$ and $OM_x$ -D3T Energies<br>Are Corrected by Excluding ZPVE and Thermal Contributions . . . . . | S214 |
| S58 | Benchmark Results for the IsoL6/11 Subset of the CE345-CHNOF Set. Rel-<br>ative Energies at 0 K (kcal/mol) . . . . .                                                                                                      | S216 |
| S59 | Benchmark Results for the IP21 Subset of the CE345-CHNOF Set. Ionization<br>Energies (kcal/mol) . . . . .                                                                                                                 | S217 |
| S60 | Benchmark Results for the EA13/03 Subset of the CE345-CHNOF Set. Elec-<br>tron Affinities (kcal/mol) . . . . .                                                                                                            | S218 |
| S61 | Benchmark Results for the PA8/06 Subset of the CE345-CHNOF Set. Proton<br>Affinities (kcal/mol) . . . . .                                                                                                                 | S219 |
| S62 | Benchmark Results for the ABDE12 Subset of the CE345-CHNOF Set. Dis-<br>sociation Energies (kcal/mol) . . . . .                                                                                                           | S220 |
| S63 | Benchmark Results for the HC7/11 Subset of the CE345-CHNOF Set. Reac-<br>tion Energies (kcal/mol) . . . . .                                                                                                               | S221 |

|     |                                                                                                                   |      |
|-----|-------------------------------------------------------------------------------------------------------------------|------|
| S64 | Benchmark Results for the $\pi$ TC13 Subset of the CE345-CHNOF Set. Proton Affinities (kcal/mol) . . . . .        | S222 |
| S65 | Benchmark Results for the $\pi$ TC13 Subset of the CE345-CHNOF Set. Relative Energies at 0 K (kcal/mol) . . . . . | S223 |
| S66 | Benchmark Results for the HTBH38/08 Subset of the CE345-CHNOF Set. Barriers at 0 K (kcal/mol) . . . . .           | S224 |
| S67 | Benchmark Results for the NHTBH38/08 Subset of the CE345-CHNOF Set. Barriers at 0 K (kcal/mol) . . . . .          | S225 |
| S68 | Benchmark Results for the NCCE31/05 Subset of the CE345-CHNOF Set. Dissociation Energies (kcal/mol) . . . . .     | S226 |
| S69 | Benchmark Results for the PDDG Set. Heats of Formation (kcal/mol) . . . .                                         | S227 |
| S70 | Benchmark Results for the PDDG Set. Ionization Potentials (eV) . . . . .                                          | S238 |
| S71 | Benchmark Results for the PM7-CHNOF Set. Heats of Formation (kcal/mol)                                            | S240 |
| S72 | Benchmark Results for the PM7-CHNOF Set. Ionization Potentials (eV) . .                                           | S259 |
| S73 | Benchmark Results for the C7H10O2 Set. Atomization Enthalpies at 298 K (kcal/mol) . . . . .                       | S261 |
| S74 | Benchmark Results for the A24-CHNOF Set. Interaction Energies (kcal/mol)                                          | S355 |
| S75 | Benchmark Results for the S22 Set. Interaction Energies (kcal/mol) . . . . .                                      | S356 |
| S76 | Benchmark Results for the S66 Set. Interaction Energies (kcal/mol) . . . . .                                      | S358 |
| S77 | Benchmark Results for the S66 $\times$ 8 Set. Interaction Energies (kcal/mol) . . .                               | S362 |
| S78 | Benchmark Results for the S66a8 Set. Interaction Energies (kcal/mol) . . . .                                      | S371 |
| S79 | Benchmark Results for the JSCH2005-CHNOF Set. Interaction Energies (kcal/mol) . . . . .                           | S380 |
| S80 | Benchmark Results for the S7L Set. Interaction Energies (kcal/mol) . . . . .                                      | S383 |
| S81 | Benchmark Results for the S30L-CHNOF Set. Interaction Energies (kcal/mol)                                         | S384 |
| S82 | Benchmark Results for the AF6 Set. Folding Energies (kcal/mol) . . . . .                                          | S385 |
| S83 | Benchmark Results for the AF6 Set. Folding Enthalpies (kcal/mol) . . . . .                                        | S386 |



|     |                                                                                                                                                                                                                                                                                                                                                                                        |      |
|-----|----------------------------------------------------------------------------------------------------------------------------------------------------------------------------------------------------------------------------------------------------------------------------------------------------------------------------------------------------------------------------------------|------|
| S84 | Benchmark Results for the X40×10-CHNOF Set. Interaction Energies (kcal/mol)                                                                                                                                                                                                                                                                                                            | S387 |
| S85 | Benchmark Results for the VEE Set. Vertical Excitation Energies (eV) . . .                                                                                                                                                                                                                                                                                                             | S389 |
| S86 | C=O and C–H Bond Lengths (Å), ∠HCH Bond Angles (degree), and Out-of-Plane Bending Angles $\theta$ (degree) Calculated with the TDDFT/B3LYP, CC2, OM $x$ /MRCI, OM $x$ -D3T/MRCI, and ODM $x$ /MRCI Methods for Two States of Formaldehyde in the ExGeom Set. Available Experimental Values Are Also Given for Comparison <sup>a</sup> . . . . .                                        | S392 |
| S87 | C=O Bond Lengths (Å) Calculated with the TDDFT/B3LYP, CC2, OM $x$ /MRCI, OM $x$ -D3T/MRCI, and ODM $x$ /MRCI Methods for Various States of Acetaldehyde, Acetone, and Formaldehyde in the ExGeom Set. Available Experimental Values Are Also Given for Comparison <sup>a</sup> . . . . .                                                                                               | S393 |
| S88 | Out-of-Plane Bending Angles (degree) Formed by the C=O Bond and the HCC, CCC, and HCH Planes for Various States of Acetaldehyde, Acetone, and Formaldehyde in the ExGeom Set, Respectively. Geometries Optimized at the TDDFT/B3LYP, CC2, OM $x$ /MRCI, OM $x$ -D3T/MRCI, and ODM $x$ /MRCI Levels of Theory. Available Experimental Values Are Also Given for Comparison <sup>a</sup> | S394 |
| S89 | ∠CCH Bond Angles (degree) Calculated with the TDDFT/B3LYP, CC2, OM $x$ /MRCI, OM $x$ -D3T/MRCI, and ODM $x$ /MRCI Methods for Various States of Acetylene in the ExGeom Set <sup>a</sup> . . . . .                                                                                                                                                                                     | S395 |
| S90 | Out-of-Plane Bending Angles (degree) Formed by the C–N Bond and the NH <sub>2</sub> Plane Calculated with the TDDFT/B3LYP, CC2, OM $x$ /MRCI, OM $x$ -D3T/MRCI, and ODM $x$ /MRCI Methods for Various States of 9 <i>H</i> -Adenine, Aniline, Cytosine, and 9 <i>H</i> -Guanine in the ExGeom Set <sup>a</sup> . . . . .                                                               | S396 |
| S91 | Benchmark Results for the SKF Set. 0–0 Transition Energies (eV) . . . . .                                                                                                                                                                                                                                                                                                              | S397 |

# 1 Parametrization Details

The parametrization program supports the following algorithms:

1. Levenberg–Marquardt method.<sup>S1,S2</sup>
2. Gauss–Newton method with line searches.<sup>S3</sup>
3. Parallel Nelder–Mead simplex method.<sup>S4</sup>
4. Controlled random search method with local mutations.<sup>S5</sup>
5. DIviding RECTangles (DIRECT) method.<sup>S6</sup>
6. Locally-biased DIRECT Method.<sup>S7</sup>
7. Improved stochastic ranking evolution strategy.<sup>S8</sup>
8. PRincipal AXIS (PRAXIS) method.<sup>S9</sup>
9. Modified implementation of the Subplex method.<sup>S10</sup>

We use own implementations of algorithms 1–2, while the code for algorithms 4–9 comes from the NLOpt library.<sup>S11</sup> There are two implementations of algorithm 3: our own and one based on NLOpt. Algorithm 4 is available in two variants (parallel and serial).

For many parametrization iterations optimizations were performed in parallel with all the above algorithms for the same initial parameter guess. Then we evaluated the most promising parameter sets obtained during optimizations on their own training sets to quickly discard bad parameter sets and to select the best candidate parameter sets. The latter were carefully evaluated manually using our large collection of validation sets (see the main text) and the next parametrization iterations were started with the most promising candidate sets as new initial guess.

We first addressed our objective 1 (see main text) by analyzing how the absolute errors of various properties of small molecules depend on changes in the parameters. We found that

adjustments of the orthogonalization correction parameters<sup>S12</sup> can significantly reduce the errors in both ZPVE-exclusive atomization energies at 0 K and heats of formation at 298 K, while affecting other properties much less. Thus, we first optimized only the orthogonalization correction parameters to satisfy objective 1. The resulting parameter sets performed already reasonably well and were of similar accuracy as the OM*x*-D3T methods. We then proceeded to achieve the other objectives (see main text). In the following we discuss specific details of the ODM2 and ODM3 parametrizations, with focus on the successful steps leading to the final parameters.

In the ODM2 parametrization we first optimized only the orthogonalization correction parameters  $F_1$ ,  $F_2$ ,  $G_1$ , and  $G_2$  in the following five steps:

**Step 1.** C and H parameters were optimized for the singlet CH-species of the MGAE109 set (Cartesian gradient norms and ZPVE-exclusive atomization energies at 0 K) and cubane (ZPVE-exclusive atomization energies at 0 K) using the Levenberg–Marquardt method and the OM2-D3T parameters as initial guess. The SSQ value of the relative errors was minimized with OM2-D3T as reference SQC method. The weight of the atomization energy of cubane ( $w_{si}^{\text{entry}}$ ) was increased to 2.

**Step 2.** O parameters were optimized for the CHO-species of the MGAE109 set (ZPVE-exclusive atomization energies at 0 K) with increased weights for selected molecules ( $w_{si}^{\text{entry}} = 5$  for water and ethanol,  $w_{si}^{\text{entry}} = 2$  for hydrogen peroxide and oxygen) using the C and H parameters from the first parametrization step. The SSQ value of absolute errors was minimized using the controlled random search method with local mutation.

**Step 3.** N parameters were optimized for the CHN-species of the MGAE109 and TAE140 sets with increased weights for selected molecules ( $w_{si}^{\text{entry}} = 5$  for methylamine, hydrazine, and ammonia in both sets) using the C and H parameters from the first parametrization step. The SSQ value of absolute errors was minimized with the Levenberg–Marquardt method.

**Step 4.** CHNO parameters obtained in steps 1–3 were re-optimized for the singlet CHNO-species, the HCO radical, and triplet oxygen of the MGAE109 set plus cubane. The SSQ value of the relative errors in Cartesian gradient norms and ZPVE-exclusive atomization energies at 0 K was minimized with OM2-D3T as reference SQC method. The improved stochastic ranking evolution strategy was used.

**Step 5.** CHNO parameters obtained in step 4 were re-optimized with the same setup as in step 4, using the controlled random search method with local mutation and with increased weights for the atomization energy of cubane ( $w_{si}^{\text{entry}} = 3$ ), acetylene ( $w_{si}^{\text{entry}} = 3$ ), and benzene ( $w_{si}^{\text{entry}} = 15$ ) and for the Cartesian gradient norms of acetylene and benzene ( $w_{si}^{\text{entry}} = 15$ ).

At the next stage we included vertical excitation energies into the training data and optimized all the above ODM2 parameters to minimize the SSQ value of relative errors. This parametrization took another five consecutive steps:

**Step 6.** Parameters from step 5 were optimized *one by one* for the singlet CHNO-species, the HCO radical, and triplet oxygen of the MGAE109 set (Cartesian gradient norms and ZPVE-exclusive atomization energies at 0 K), the CHNO set (heats of formation at 298 K, bond lengths, angles, dihedral angles, ionization potentials and differences between them, dipole moments, relative energies, barriers, vibrational wavenumbers), the VEE set (vertical excitation energies), and cubane (Cartesian gradient norms and ZPVE-exclusive atomization energies at 0 K). We changed the weights  $w_{sp}^{\text{prop}}$  of the errors in atomization energies of the MGAE109 set to 3.1324, in bond lengths to 0.47838, and in vertical excitation energies to 10. We also adjusted the weights  $w_{si}^{\text{entry}}$  for selected errors in atomization energies (acetylene to 3, benzene to 15, water and ammonia to 10), in Cartesian gradient norms (acetylene and benzene to 15), in some barriers and relative energies (to 2), and in the atomization energy of cubane (to 3).

**Step 7.** Parameters from step 6 were re-optimized one more time using the same setup as

in step 6.

**Step 8.** Parameters from step 7 were re-optimized (with  $G_2$  taken from step 6) using the same setup as in step 7, but with the weights for selected errors set to the following values:  $w_{sp}^{\text{prop}}$  to 1.48841 for atomization energies of the MGAE109 set and to 10.01827 for vertical excitation energies;  $w_{si}^{\text{entry}}$  to 5 for the atomization energies and Cartesian gradient norms of acetylene, benzene,  $\text{C}_4\text{H}_4\text{O}$ , and  $\text{C}_4\text{H}_5\text{N}$ .

**Step 9.** Parameters from step 8 were re-optimized (with  $G_2$  taken from step 7) using the same setup as in step 8, but *simultaneously* and with the weights  $w_{sp}^{\text{prop}}$  for selected errors set to the following values: to 1.35838 for bond lengths in the CHNO set, to 2 for other properties in the CHNO set, and to 5 for vertical excitation energies.

**Step 10.** F parameters were optimized for the CHNOF-species of the MGAE109 and TAE140 sets (ZPVE-exclusive atomization energies at 0 K) and for the FLUOR set (heats of formation at 298 K, bond lengths, angles, dihedral angles, ionization potentials, dipole moments, relative energies, and barriers). The CHNO parameters were taken from step 9 and the initial F parameters from the standard OM2-D3T method.

As reference SQC method we used OM2 for the CHNO and FLUOR sets, and OM2-D3T for the MGAE109 and TAE140 sets and for cubane. To meet objective 4, we scaled the reference SQC (OM2) errors for the VEE set by a factor of 0.6. The Levenberg–Marquardt method was employed for steps 6–9 and the Gauss–Newton method with line searches for step 10.

Finally, we included noncovalent complexes into the training data and re-optimized all the above ODM2 parameters to minimize the SSQ value of the relative errors in two more steps:

**Step 11.** CHNO parameters from step 9 were re-optimized for the singlet CHNO-species, the HCO radical, and triplet oxygen of the MGAE109 set (Cartesian gradient norms

and ZPVE-exclusive atomization energies at 0 K), the CHNO set (heats of formation at 298 K, bond lengths, angles, dihedral angles, ionization potentials and differences between them, dipole moments, relative energies, barriers, vibrational wavenumbers), the VEE set (vertical excitation energies), the S66 set (relative energies, single-point calculations), and cubane (Cartesian gradient norm and ZPVE-exclusive atomization energy at 0 K). The Levenberg–Marquardt method was used. The same weights as in step 9 were adopted and the weight for the relative energies in the S66 set was set to 4.

**Step 12.** F parameters were optimized for the CHNOF-species of the MGAE109 and TAE140 sets (ZPVE-exclusive atomization energies at 0 K) and for the FLUOR set (heats of formation at 298 K, bond lengths, angles, dihedral angles, ionization potentials, dipole moments, relative energies, and barriers). The CHNO parameters were taken from step 11, initial F parameters were taken from step 10, and the PRAXIS method was used. OM3 served as reference SQC method. The weights ( $w_{sp}^{\text{prop}}$ ) for bond lengths were increased to 5.

The reference SQC method was the same as in steps 6–10 and the OM2-D3 method was used as a reference SQC method for the S66 set. The parameters obtained in steps 11 and 12 are the final ODM2 parameters and their values are given in the main text.

The ODM3 parametrization started with the optimization of the orthogonalization correction parameters  $F_1$  and  $G_1$  to minimize the SSQ value of the absolute errors in ZPVE-exclusive atomization energies at 0 K in four steps:

**Step 1.** C and H parameters were optimized for the singlet CH-species of the MGAE109 set and cubane.

**Step 2.** O parameters were optimized for the CHO-species of the MGAE109 set with increased weights for selected molecules ( $w_{si}^{\text{entry}} = 5$  for water and ethanol,  $w_{si}^{\text{entry}} = 2$  for hydrogen peroxide and oxygen) using the C and H parameters from step 1.

**Step 3.** N parameters were optimized for the CHN-species of the MGAE109 and TAE140 sets with increased weights for selected molecules ( $w_{si}^{\text{entry}} = 5$  for methylamine, hydrazine, and ammonia in both sets) using the C and H parameters from step 1.

**Step 4.** F parameters were optimized for the CHNOF-species of the MGAE109 and TAE140 sets using the CHNO parameters from steps 1–3.

In all cases, the standard OM3-D3T parameters served as initial guess and a modified implementation of the Subplex method was used. This rather restricted parametrization was sufficient to achieving objectives 1–3 reasonably well.

Next, we minimized the SSQ value of the relative errors in multiple properties by optimizing simultaneously all the above ODM3 parameters in three additional steps:

**Step 5.** CHNO parameters obtained in steps 1–3 were re-optimized for the singlet CHNO-species, the HCO radical, and triplet oxygen of the MGAE109 set (Cartesian gradient norms and ZPVE-exclusive atomization energies at 0 K, OM3-D3T as reference SQC method), the CHNO set (heats of formation at 298 K, bond lengths, angles, dihedral angles, ionization potentials and differences between them, dipole moments, relative energies, barriers, vibrational wavenumbers, OM3 as reference SQC method), the VEE set (vertical excitation energies, ODM2 as reference SQC method), the S66 set (relative energies, D3-corrected OM3 as reference method, single-point calculations), and cubane (Cartesian gradient norm and ZPVE-exclusive atomization energy at 0 K, OM3-D3T as reference SQC method). The Gauss–Newton method with line searches was used. Increased weights were applied for the atomization energy of cubane ( $w_{si}^{\text{entry}} = 2$ ) and for a few selected barriers and relative energies in the CHNO set ( $w_{si}^{\text{entry}} = 2$ ).

**Step 6.** CHNO parameters obtained in step 5 were re-optimized using the same setup as in step 5, but with weights ( $w_{sp}^{\text{prop}}$ ) for heats of formation (in the CHNO set) and excited state-energies (in the VEE set) increased to 10.

**Step 7.** F parameters were optimized for the CHNOF-species of the MGAE109 and TAE140 sets (ZPVE-exclusive atomization energies at 0 K) and for the FLUOR set (heats of formation at 298 K, bond lengths, angles, dihedral angles, ionization potentials, dipole moments, relative energies, and barriers). The CHNO parameters were taken from step 6, the initial F parameters were taken from step 4, and the PRAXIS method was used. OM3 served as the reference SQC method. The weights ( $w_{sp}^{\text{prop}}$ ) for heats of formation and atomization energies were increased to 2.

The parameters obtained in steps 6 and 7 are the final ODM3 parameters and their values are given in the main text.



## 2 Plots of Resonance Integrals

### 2.1 ODM2 vs OM2

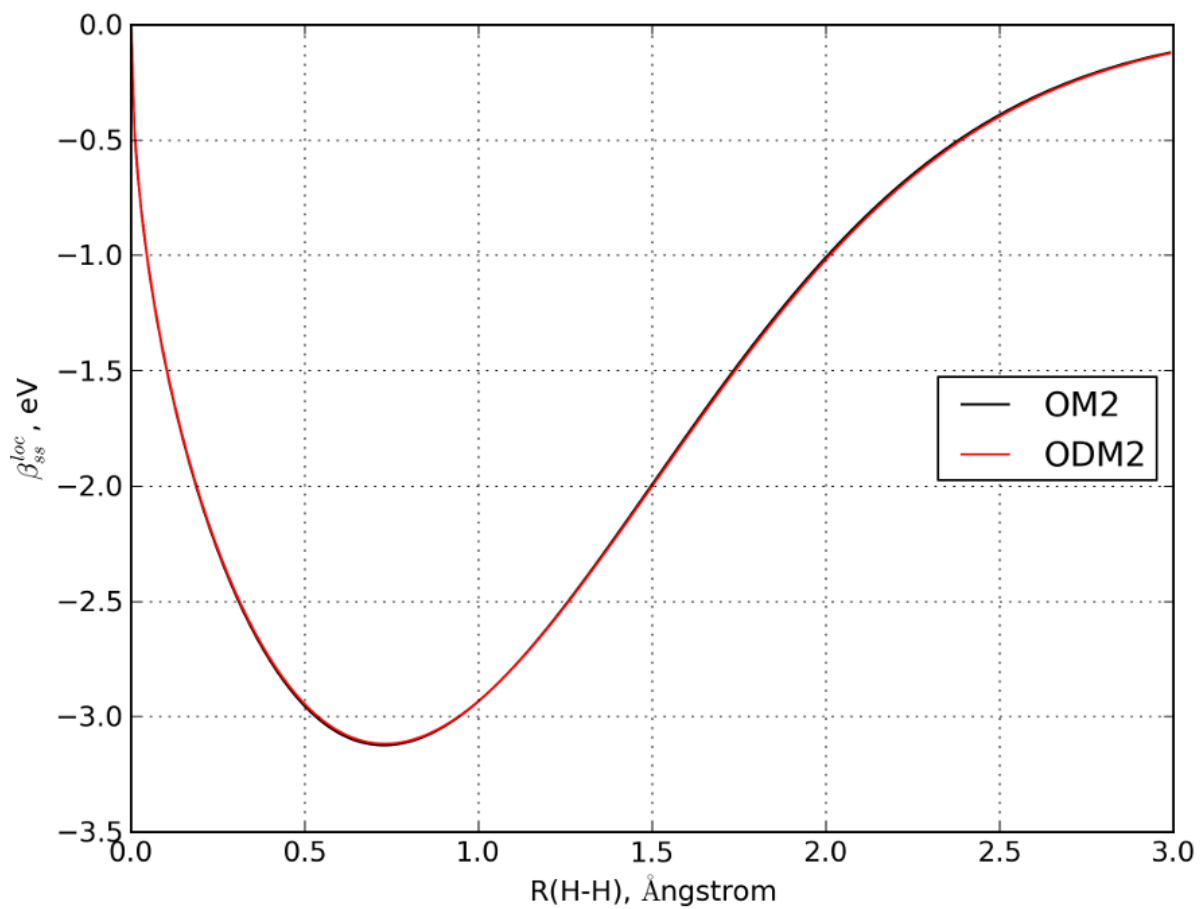

Figure S1: Comparison of *ss* local resonance integrals for the H–H pair calculated using standard OM2 and new ODM2 parameters.

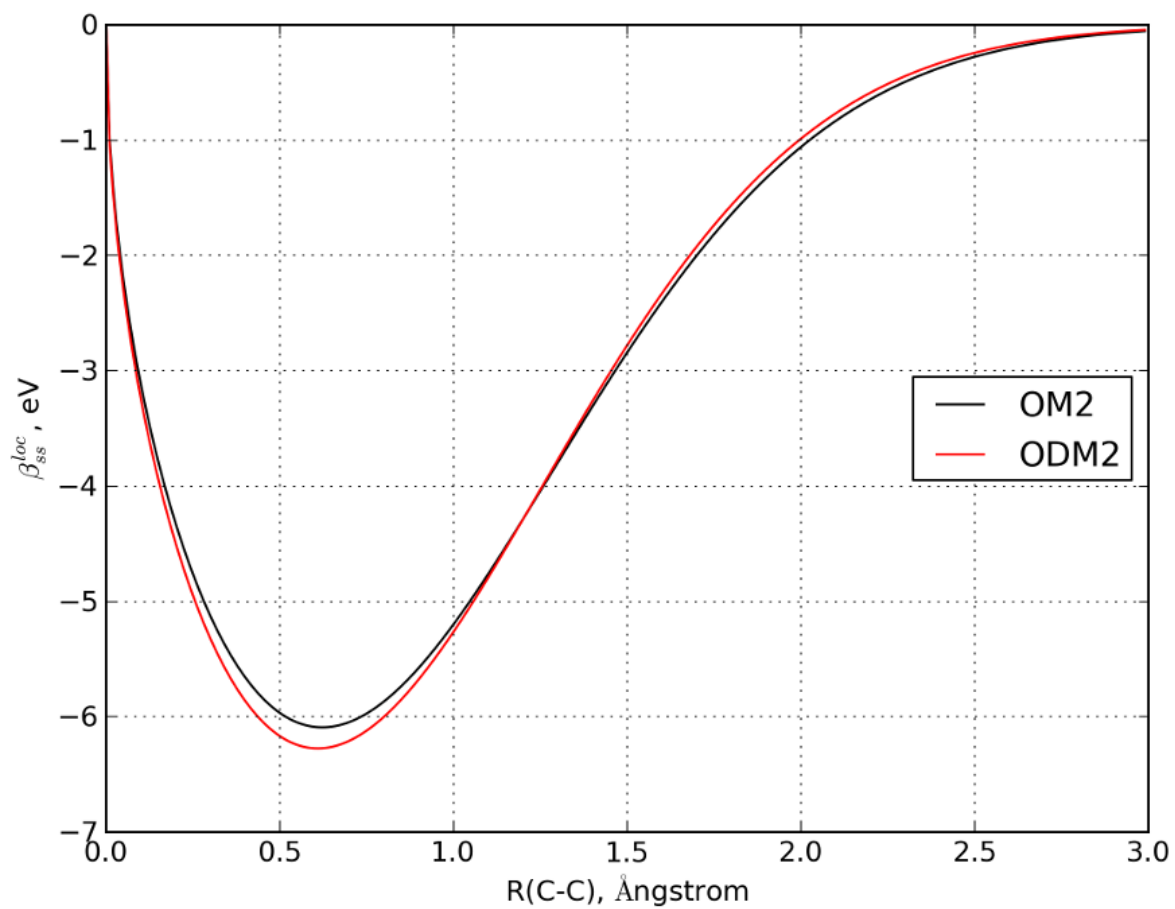

Figure S2: Comparison of *ss* local resonance integrals for the C–C pair calculated using standard OM2 and new ODM2 parameters.

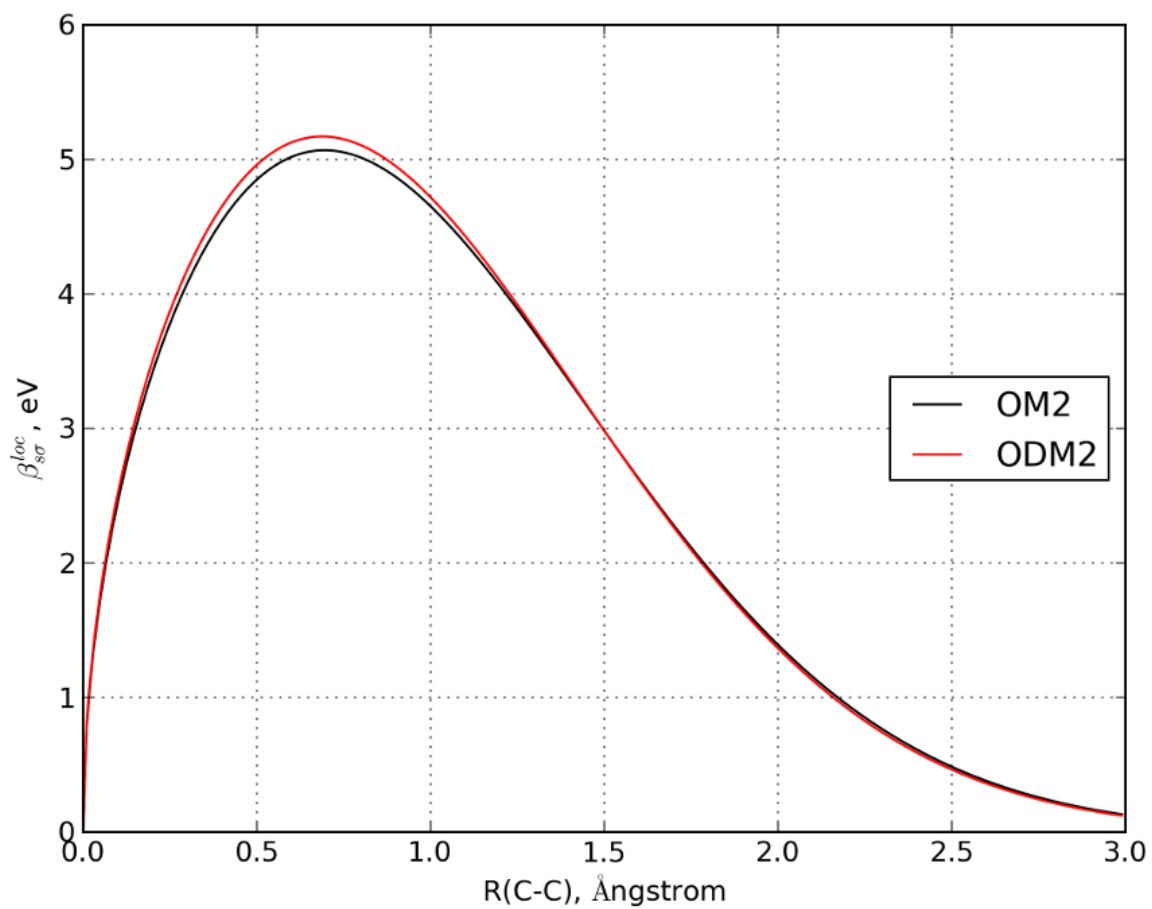

Figure S3: Comparison of  $\sigma$  local resonance integrals for the C–C pair calculated using standard OM2 and new ODM2 parameters.

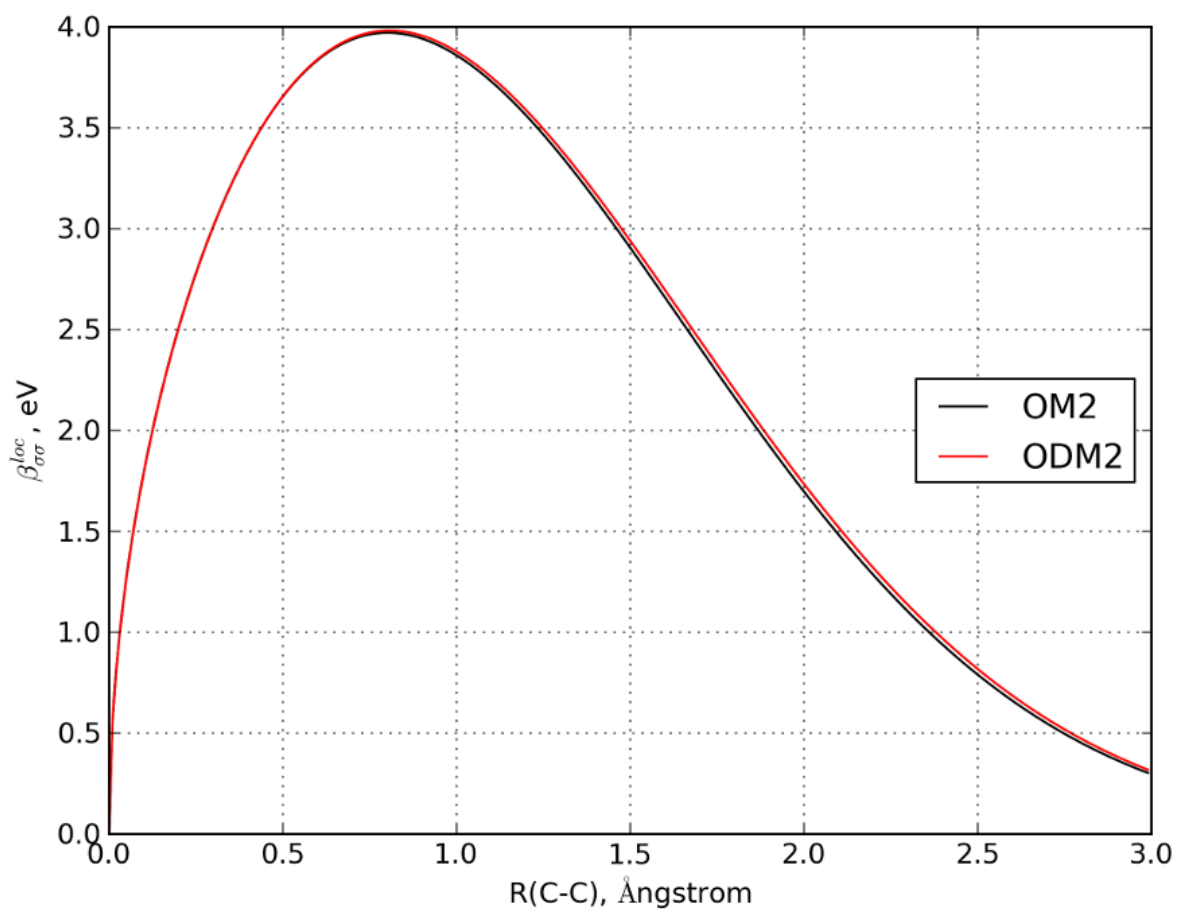

Figure S4: Comparison of  $\sigma\sigma$  local resonance integrals for the C–C pair calculated using standard OM2 and new ODM2 parameters.

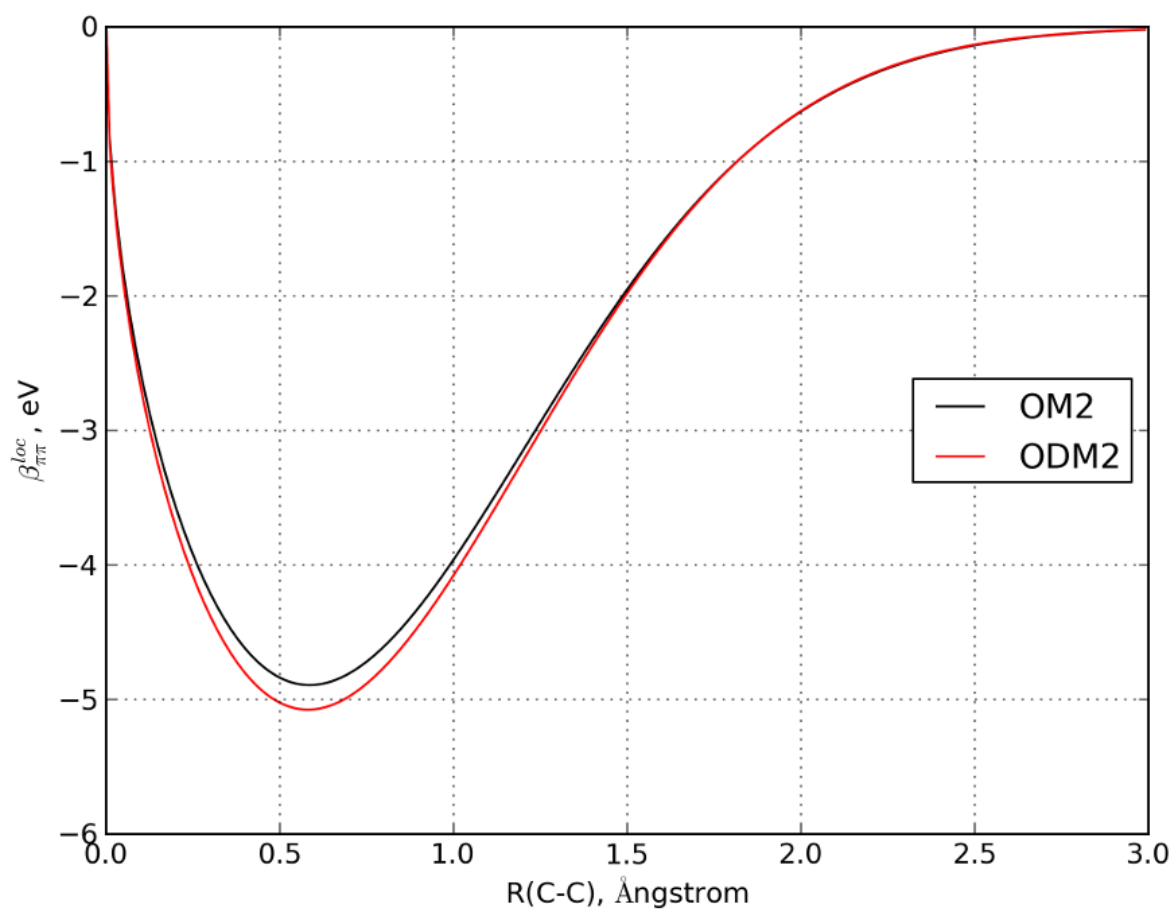

Figure S5: Comparison of  $\pi\pi$  local resonance integrals for the C–C pair calculated using standard OM2 and new ODM2 parameters.

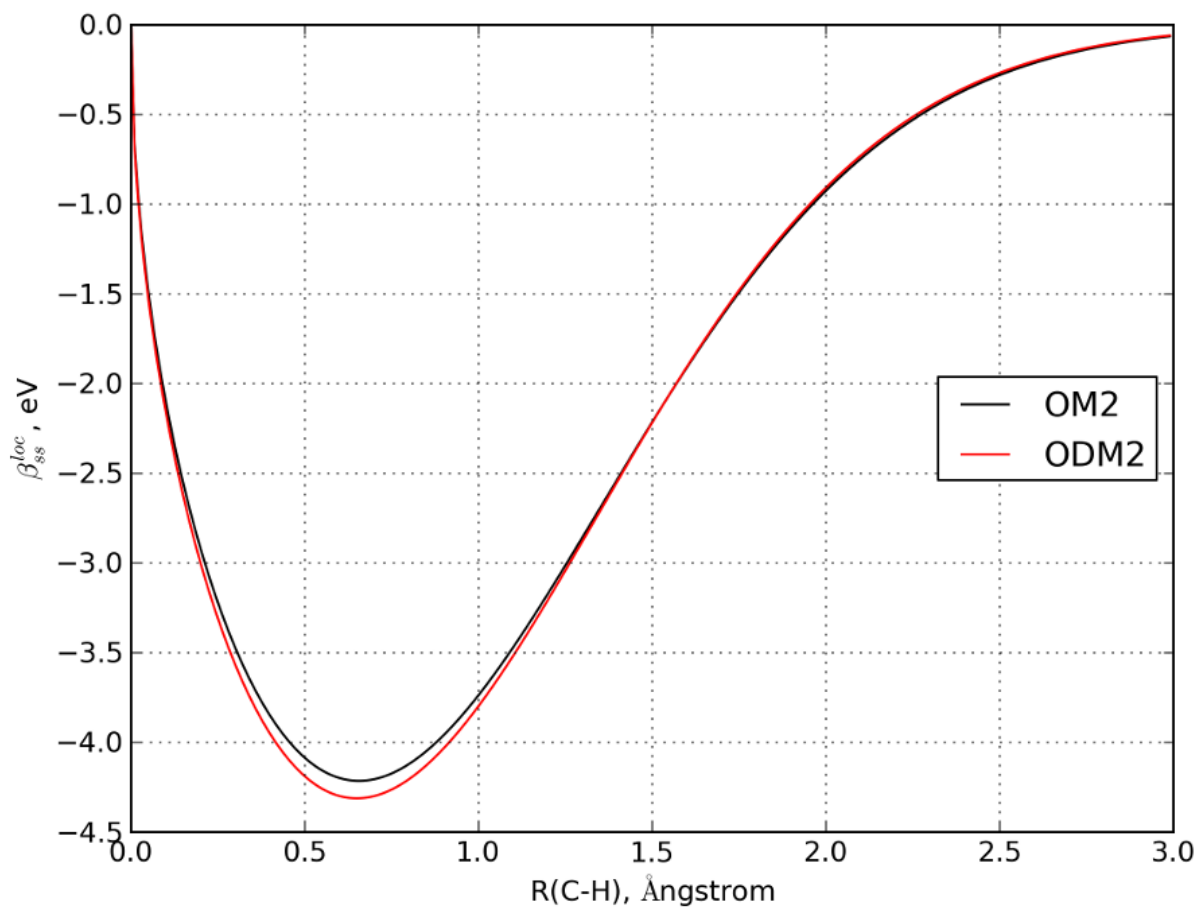

Figure S6: Comparison of *ss* local resonance integrals for the C–H pair calculated using standard OM2 and new ODM2 parameters.

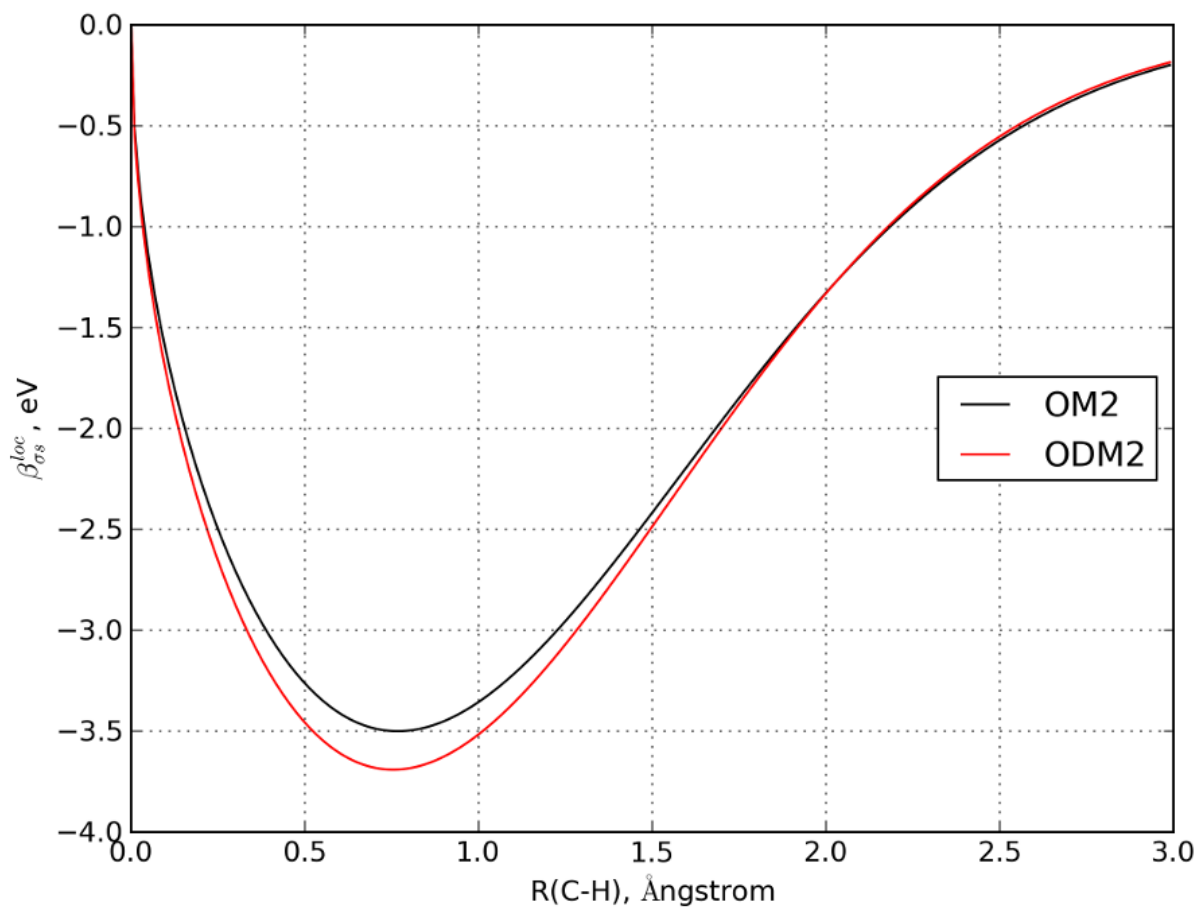

Figure S7: Comparison of  $\sigma s$  local resonance integrals for the C–H pair calculated using standard OM2 and new ODM2 parameters.

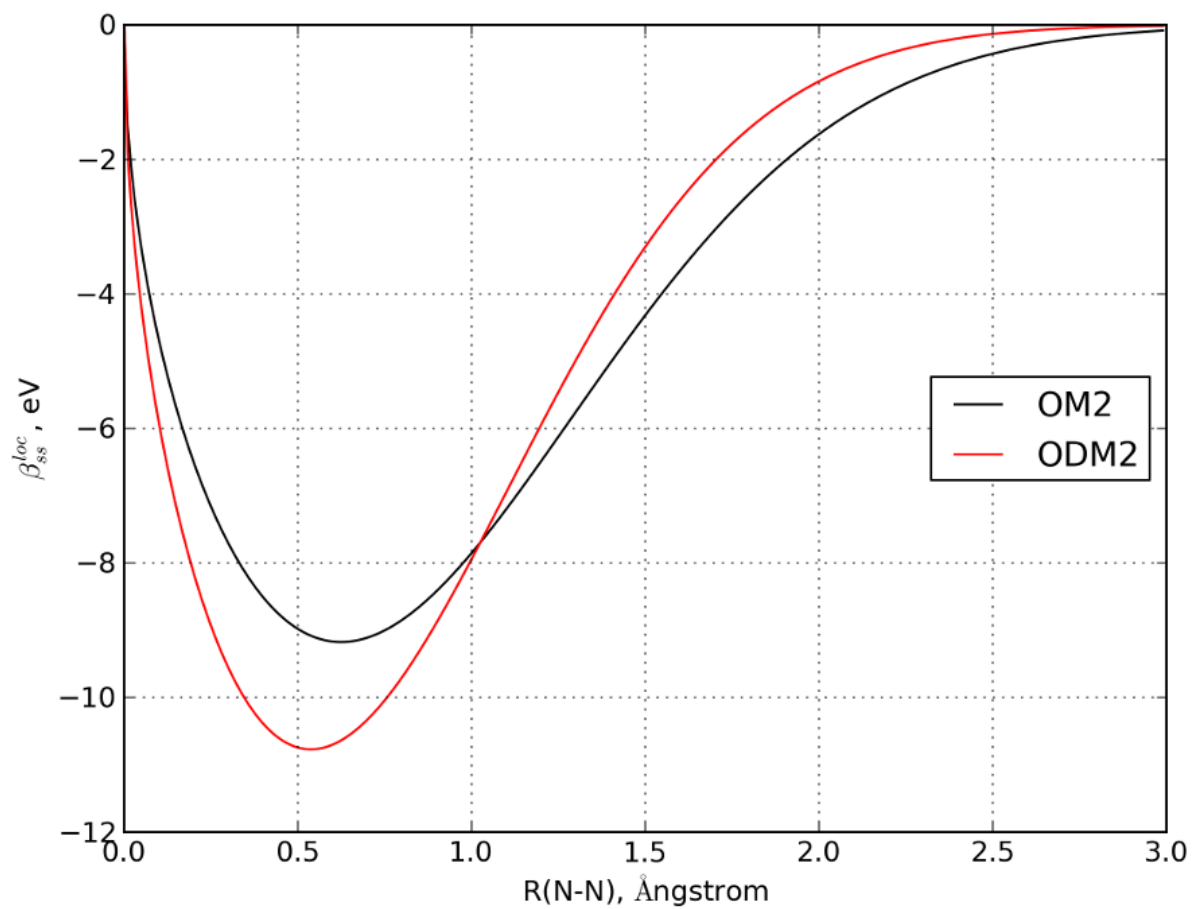

Figure S8: Comparison of  $ss$  local resonance integrals for the N–N pair calculated using standard OM2 and new ODM2 parameters.



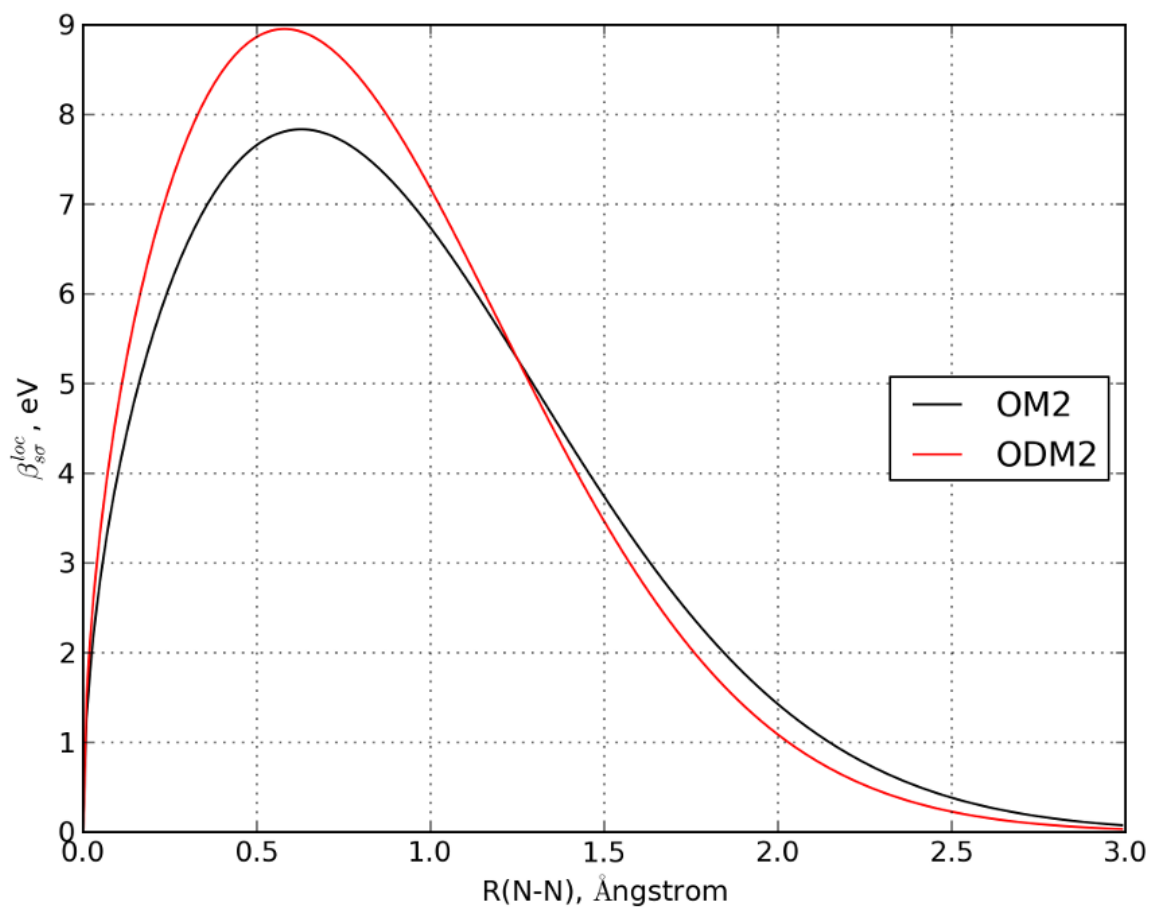

Figure S9: Comparison of  $\sigma$  local resonance integrals for the N–N pair calculated using standard OM2 and new ODM2 parameters.

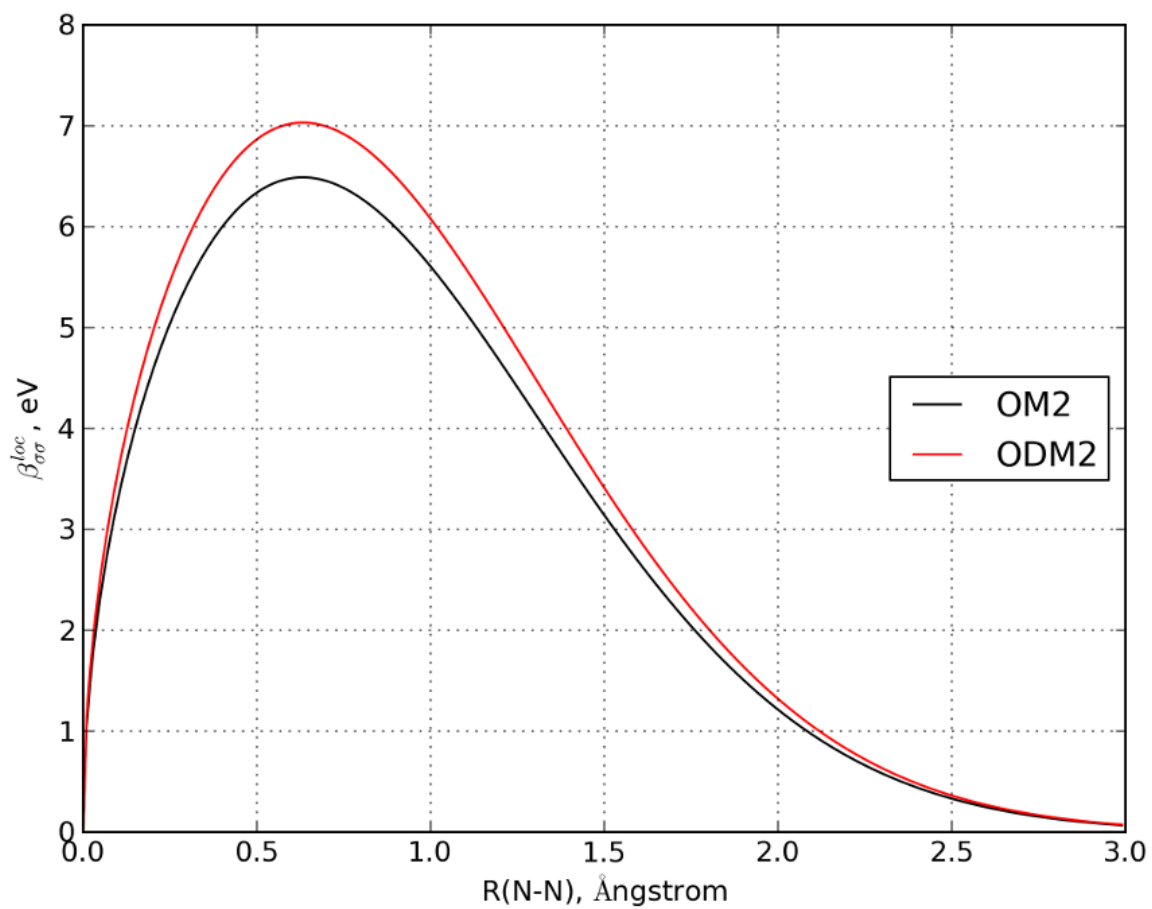

Figure S10: Comparison of  $\sigma\sigma$  local resonance integrals for the N–N pair calculated using standard OM2 and new ODM2 parameters.

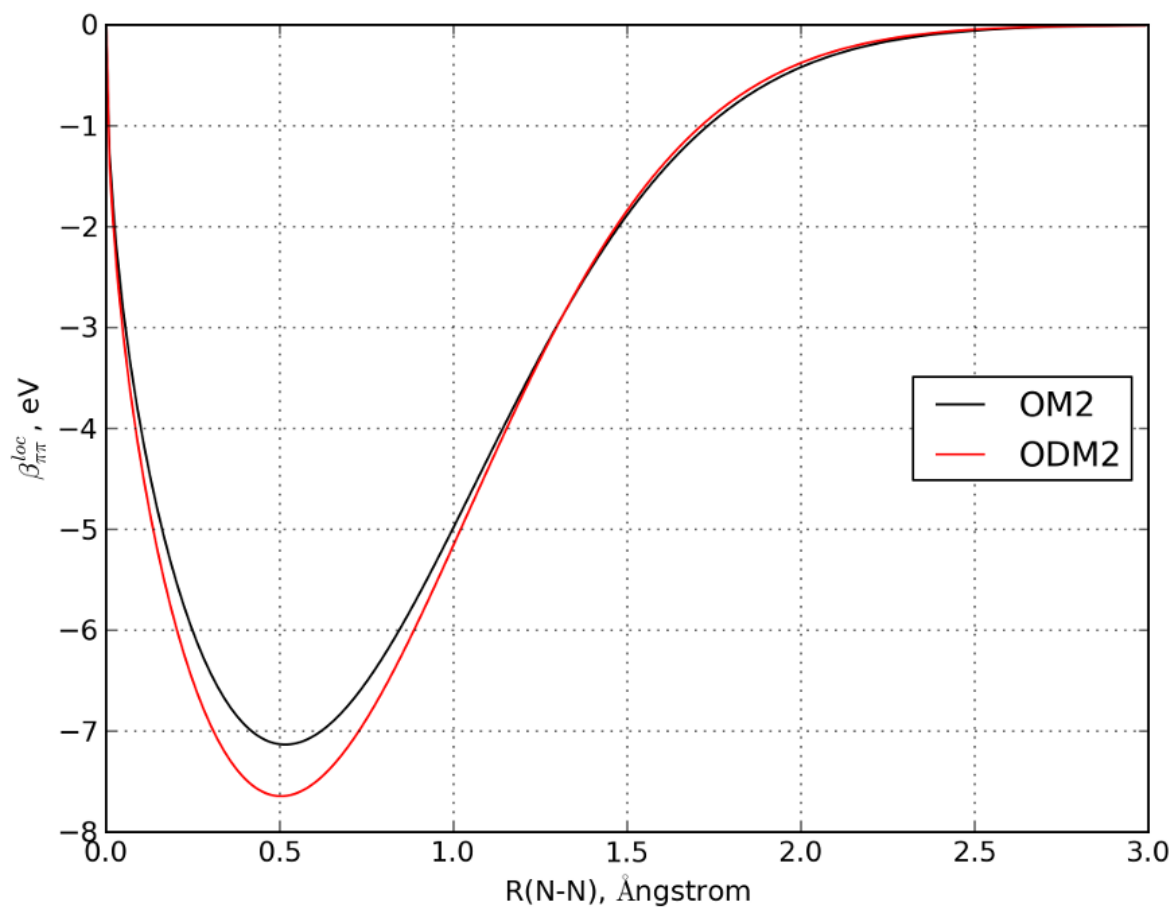

Figure S11: Comparison of  $\pi\pi$  local resonance integrals for the N–N pair calculated using standard OM2 and new ODM2 parameters.

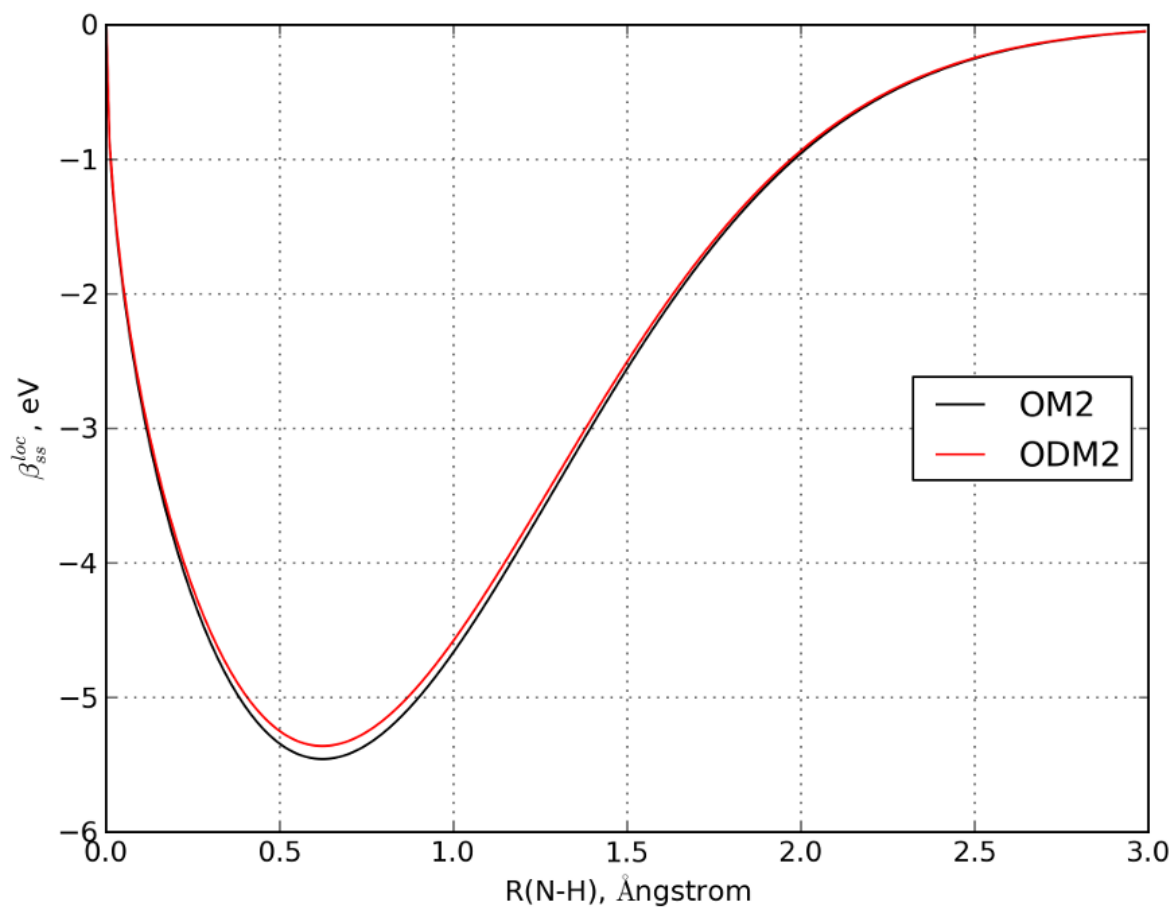

Figure S12: Comparison of  $ss$  local resonance integrals for the N–H pair calculated using standard OM2 and new ODM2 parameters.

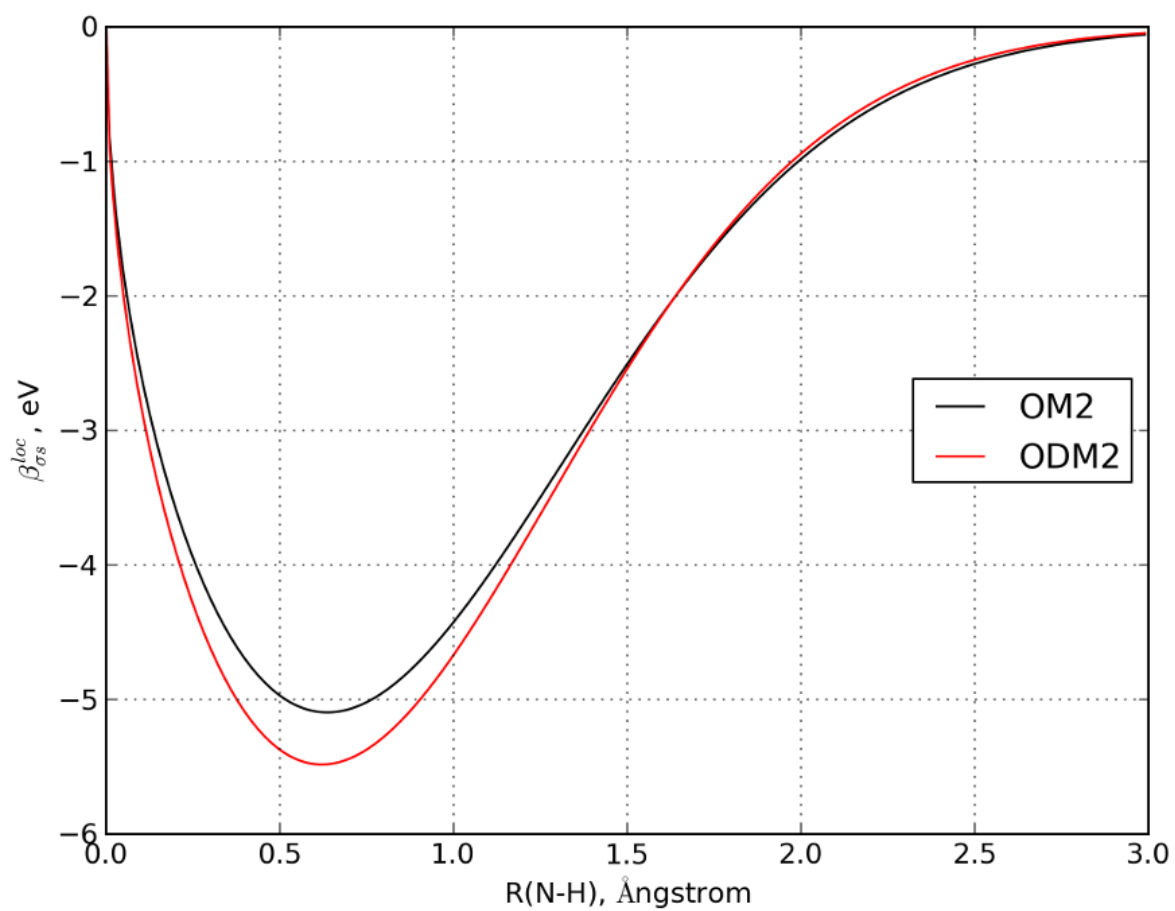

Figure S13: Comparison of  $\sigma s$  local resonance integrals for the N–H pair calculated using standard OM2 and new ODM2 parameters.

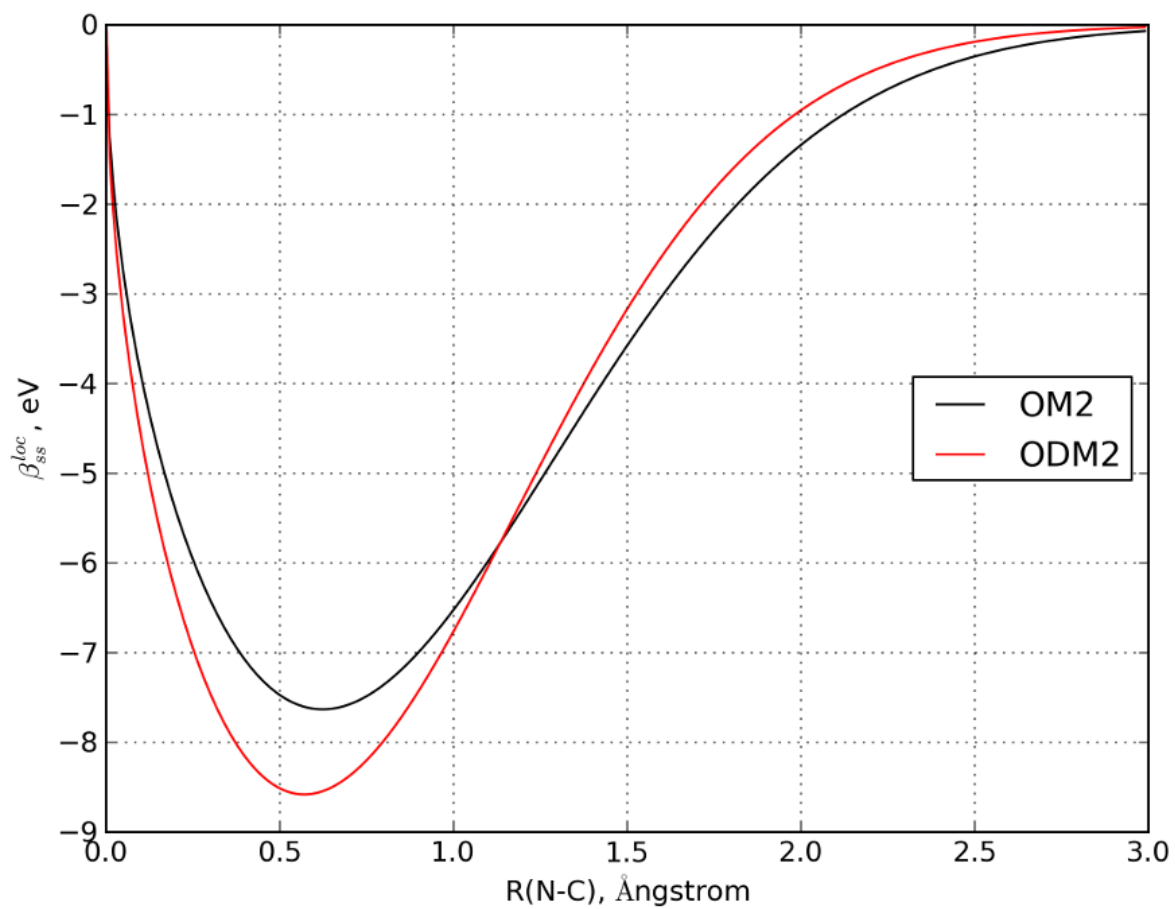

Figure S14: Comparison of  $ss$  local resonance integrals for the N–C pair calculated using standard OM2 and new ODM2 parameters.

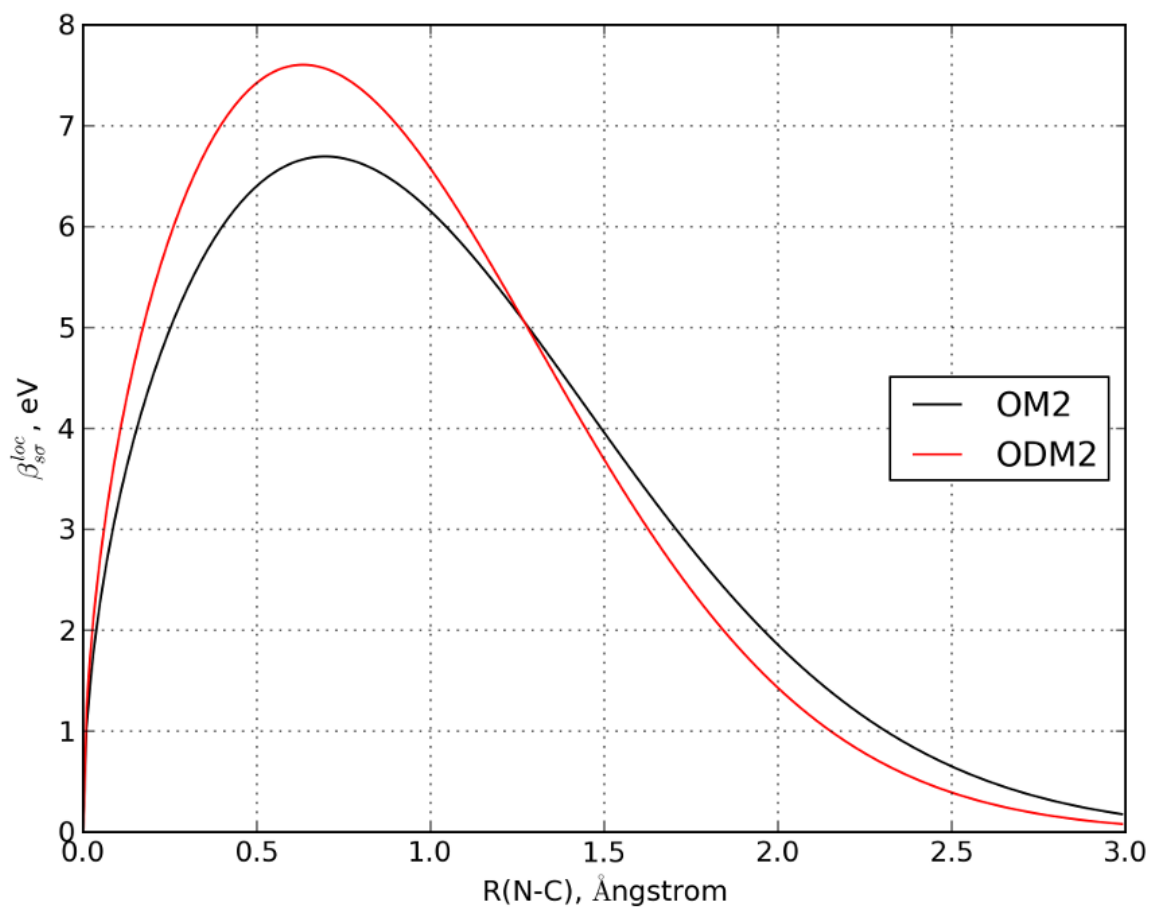

Figure S15: Comparison of  $s\sigma$  local resonance integrals for the N–C pair calculated using standard OM2 and new ODM2 parameters.

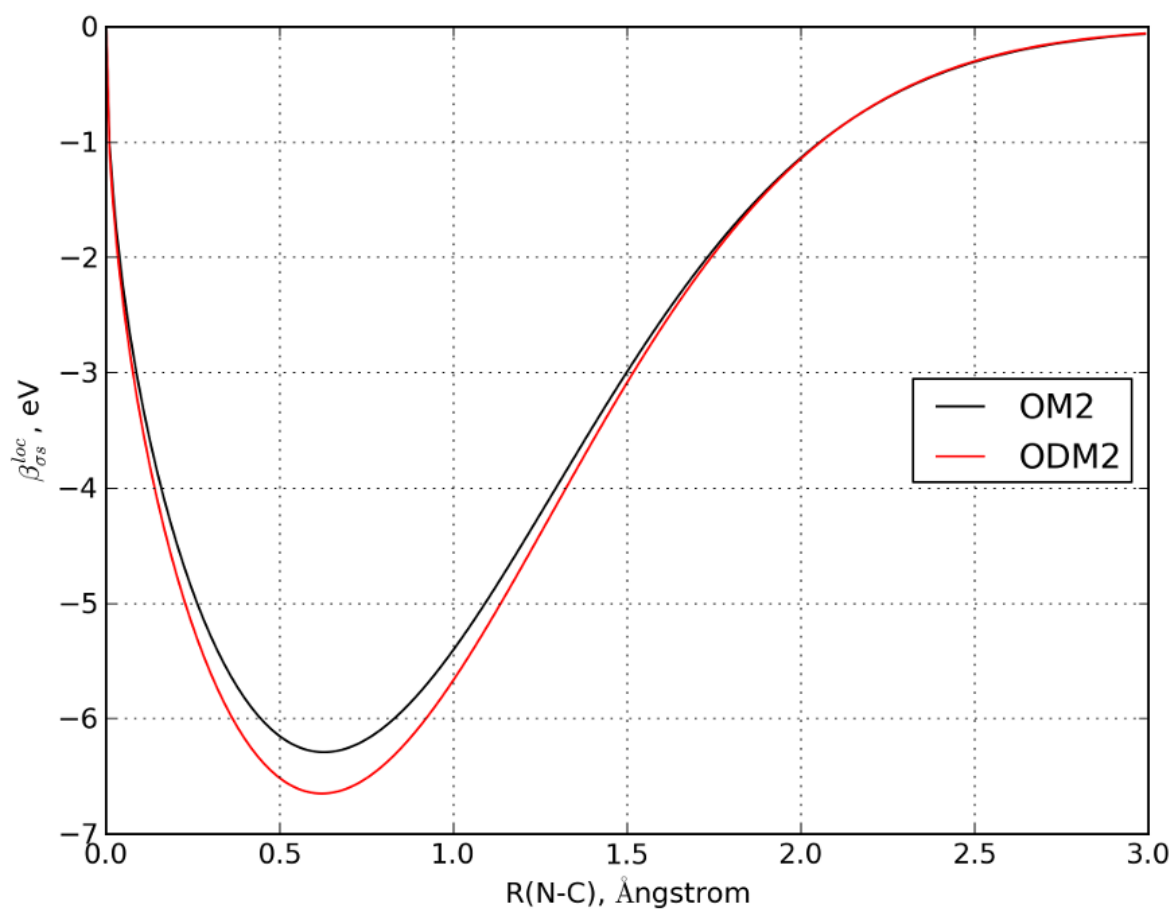

Figure S16: Comparison of  $\sigma s$  local resonance integrals for the N–C pair calculated using standard OM2 and new ODM2 parameters.



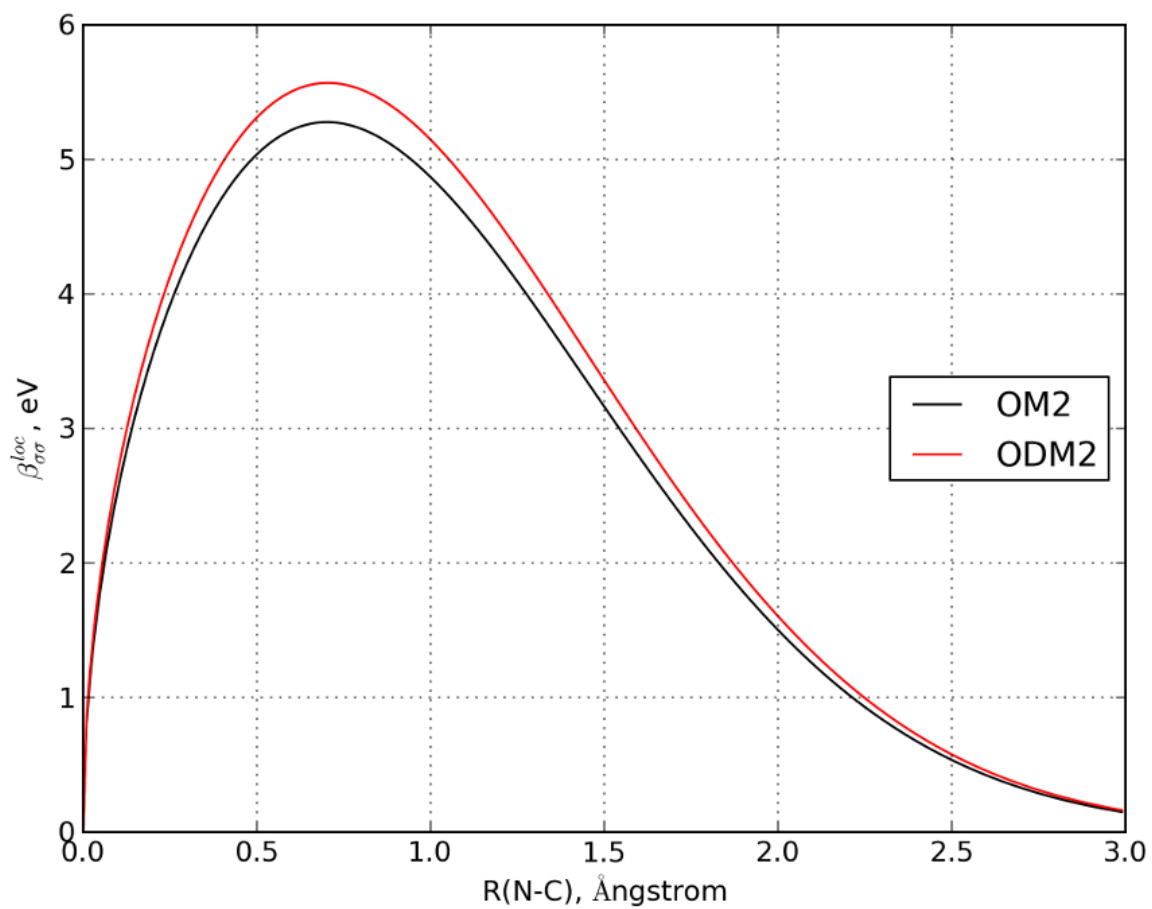

Figure S17: Comparison of  $\sigma\sigma$  local resonance integrals for the N–C pair calculated using standard OM2 and new ODM2 parameters.

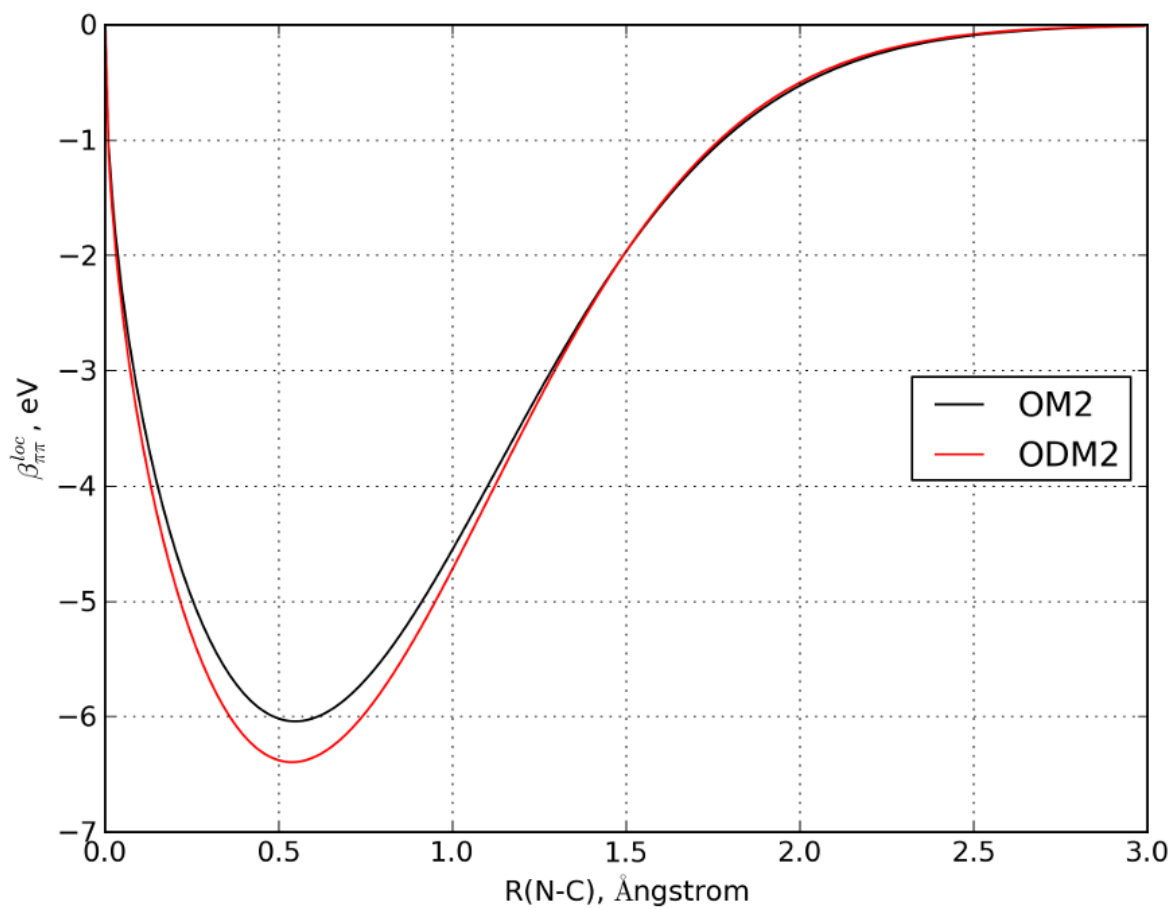

Figure S18: Comparison of  $\pi\pi$  local resonance integrals for the N–C pair calculated using standard OM2 and new ODM2 parameters.

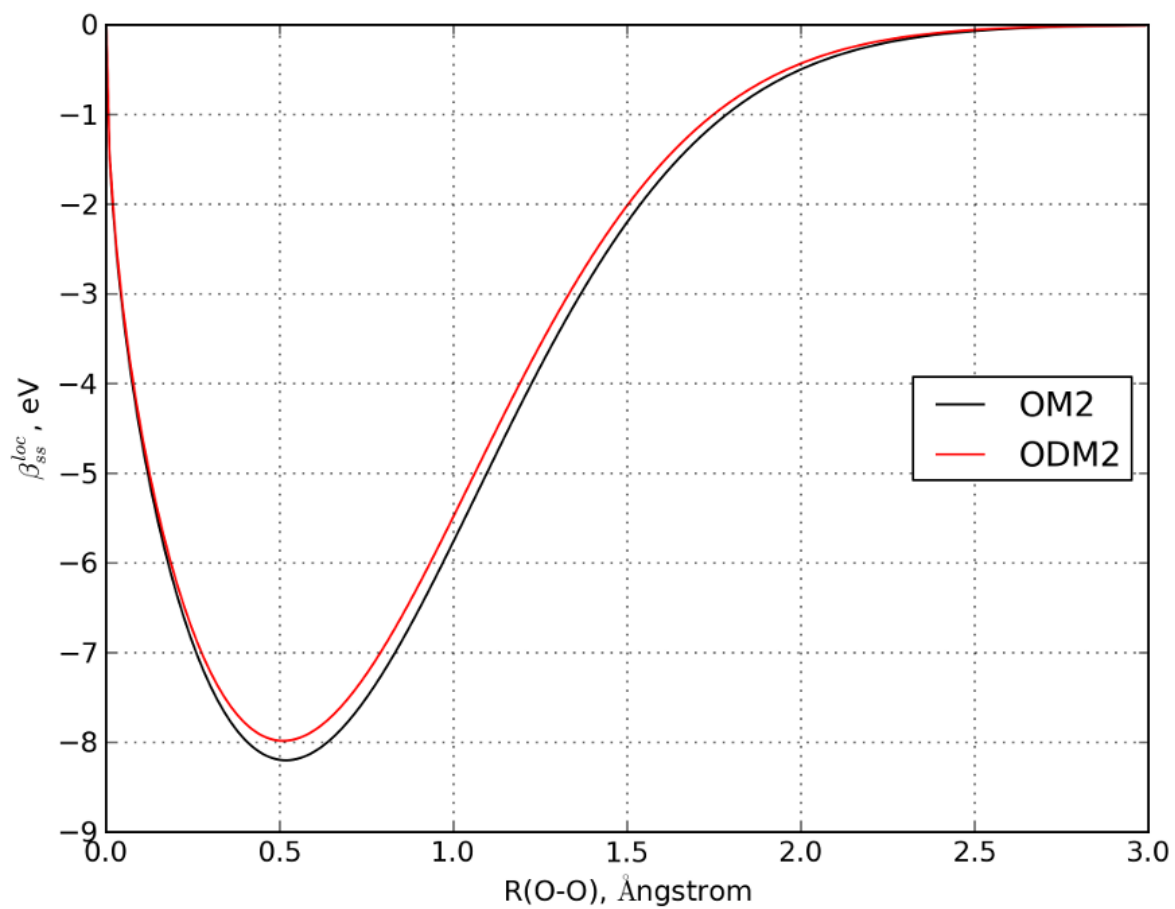

Figure S19: Comparison of  $ss$  local resonance integrals for the O–O pair calculated using standard OM2 and new ODM2 parameters.

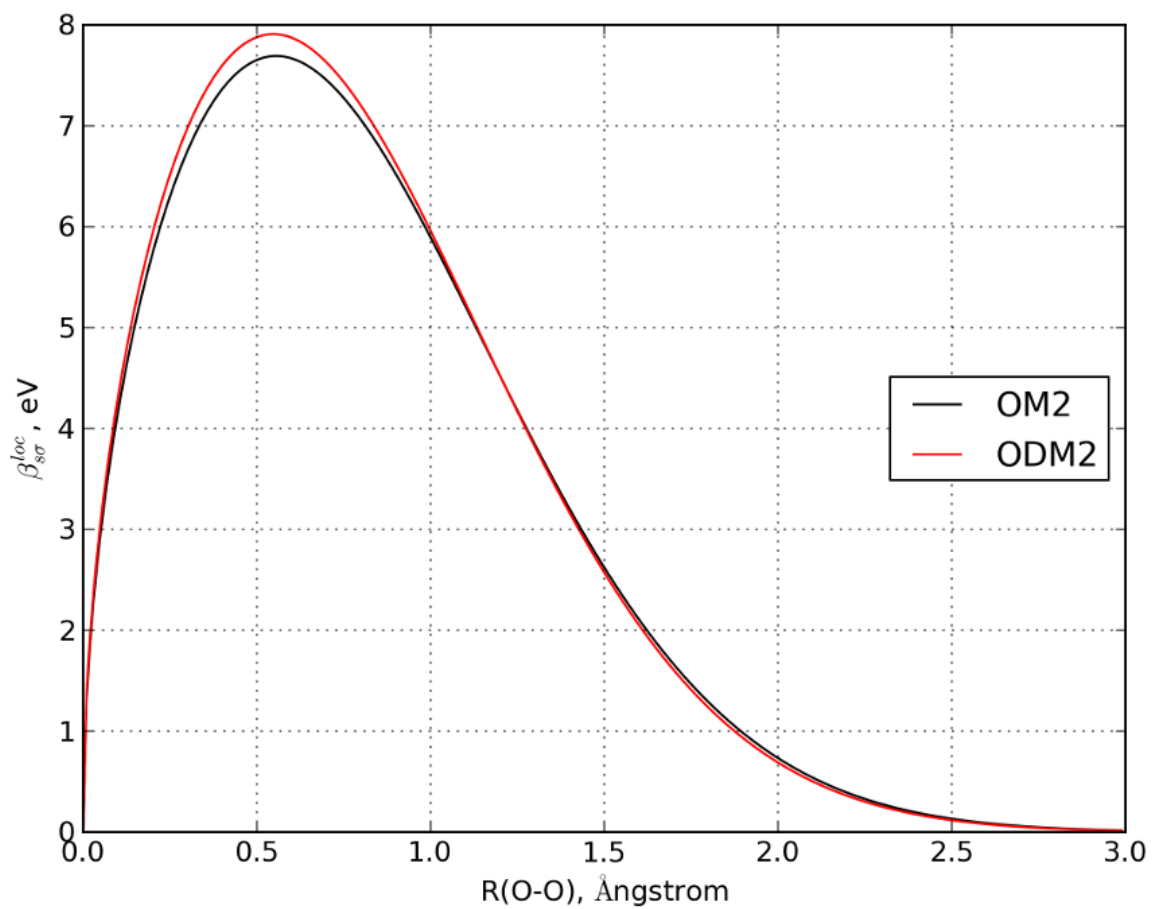

Figure S20: Comparison of  $s\sigma$  local resonance integrals for the O–O pair calculated using standard OM2 and new ODM2 parameters.

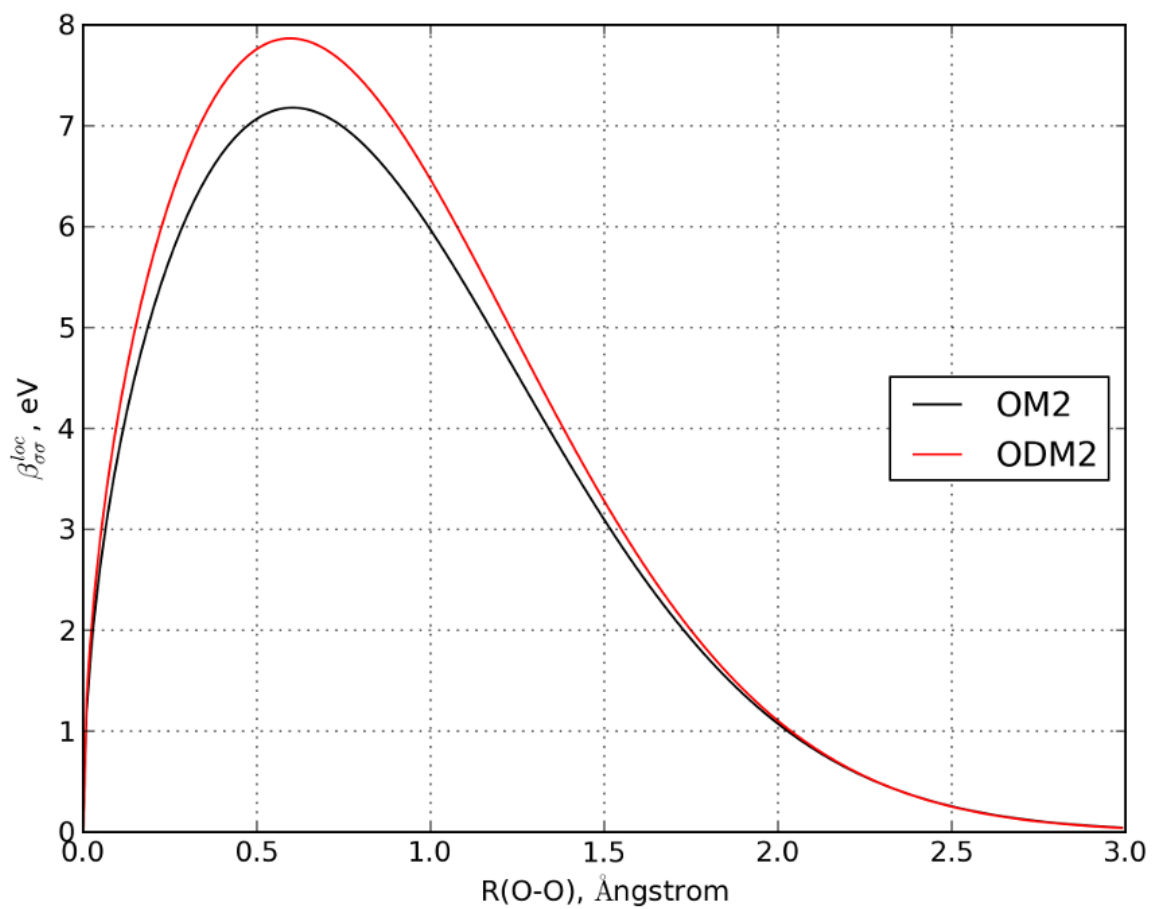

Figure S21: Comparison of  $\sigma\sigma$  local resonance integrals for the O–O pair calculated using standard OM2 and new ODM2 parameters.

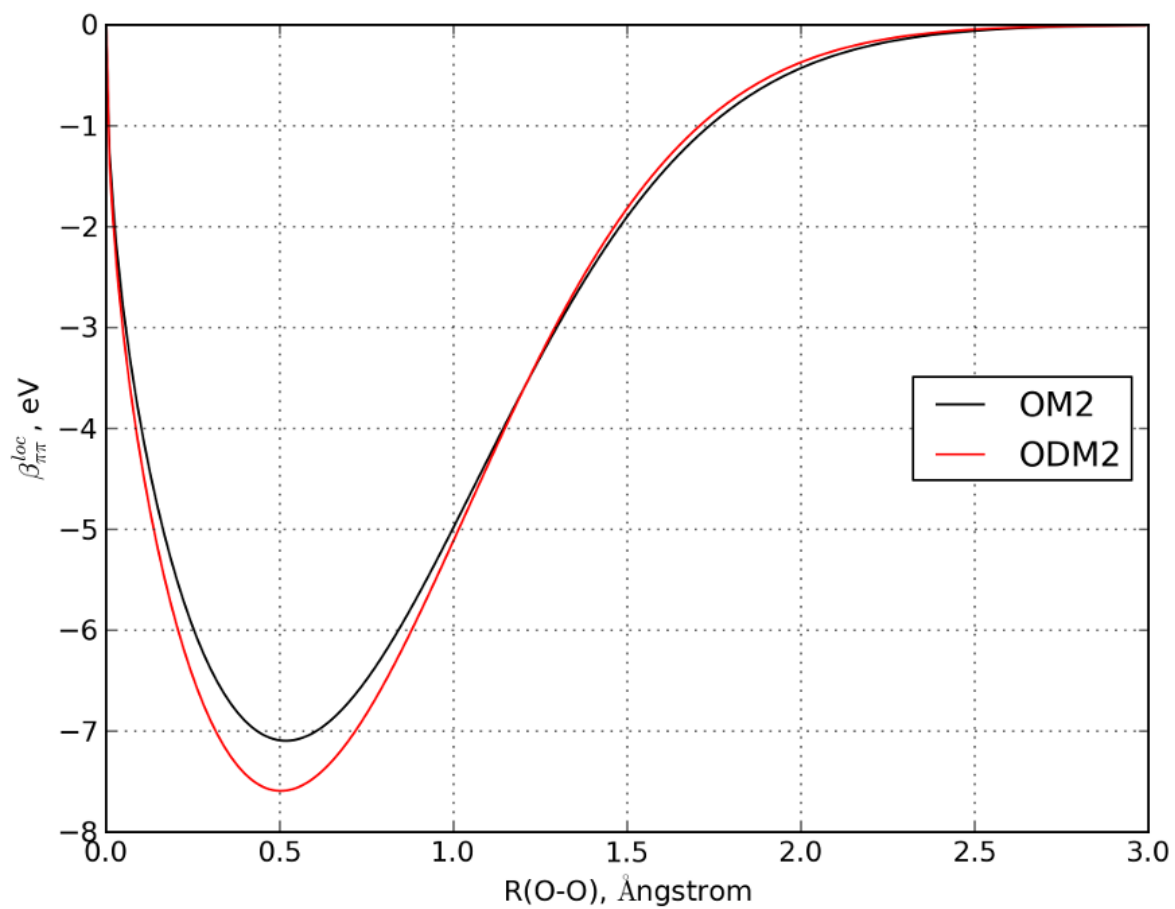

Figure S22: Comparison of  $\pi\pi$  local resonance integrals for the O–O pair calculated using standard OM2 and new ODM2 parameters.

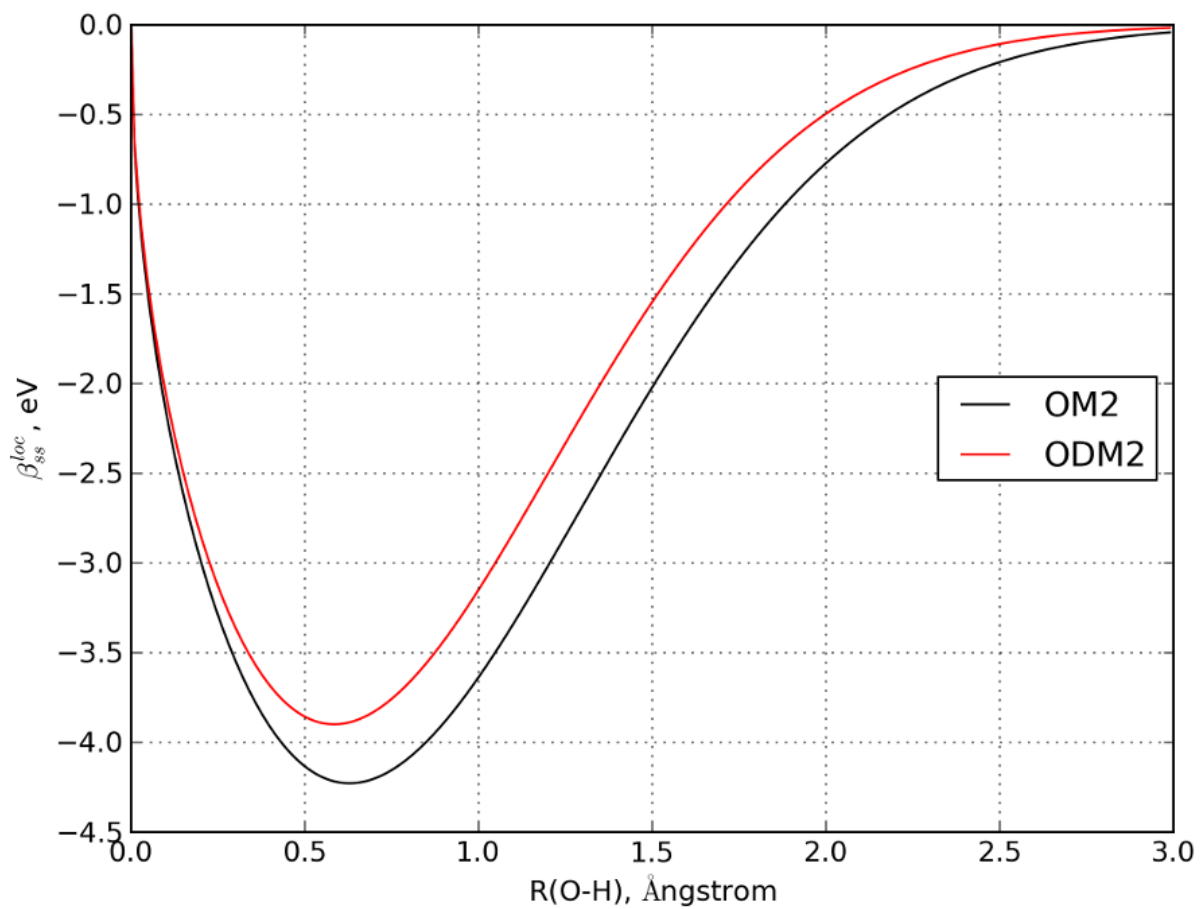

Figure S23: Comparison of  $ss$  local resonance integrals for the O–H pair calculated using standard OM2 and new ODM2 parameters.

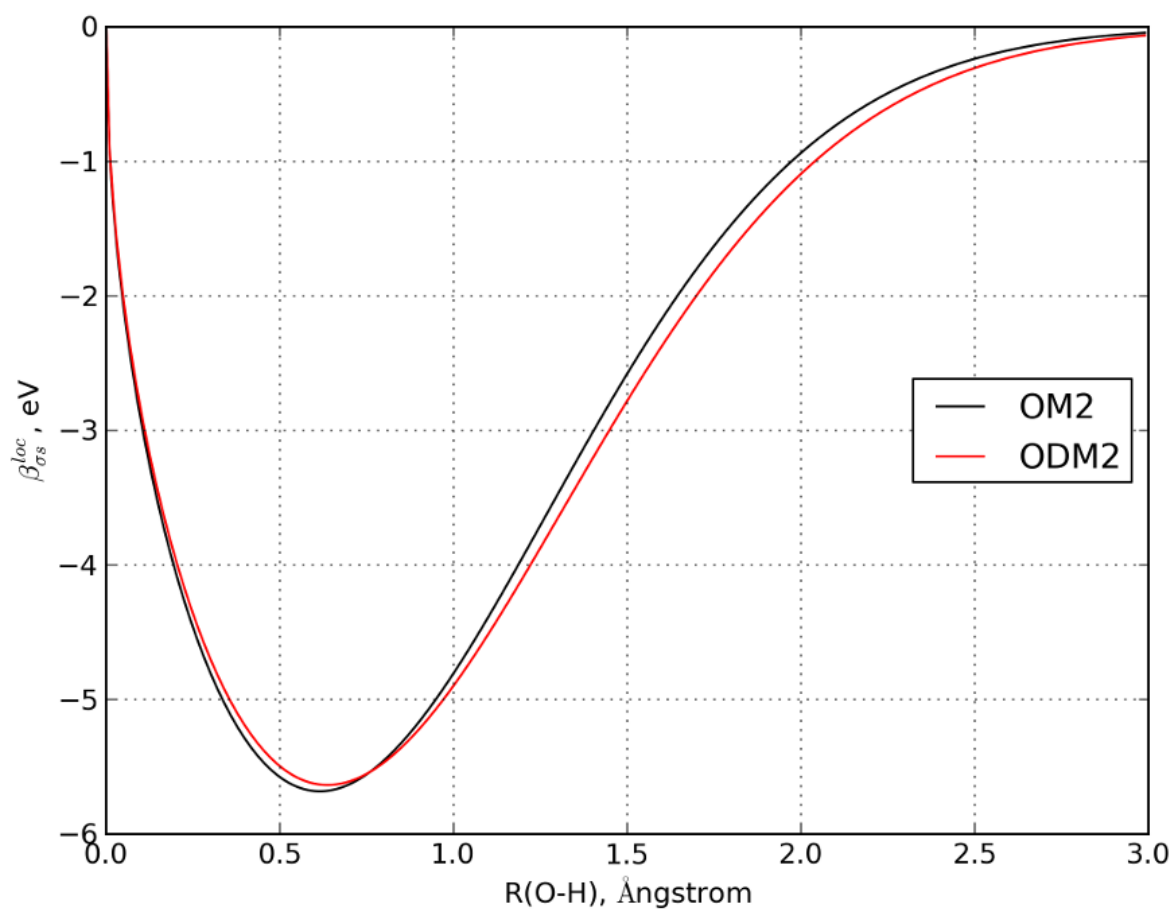

Figure S24: Comparison of  $\sigma_s$  local resonance integrals for the O–H pair calculated using standard OM2 and new ODM2 parameters.



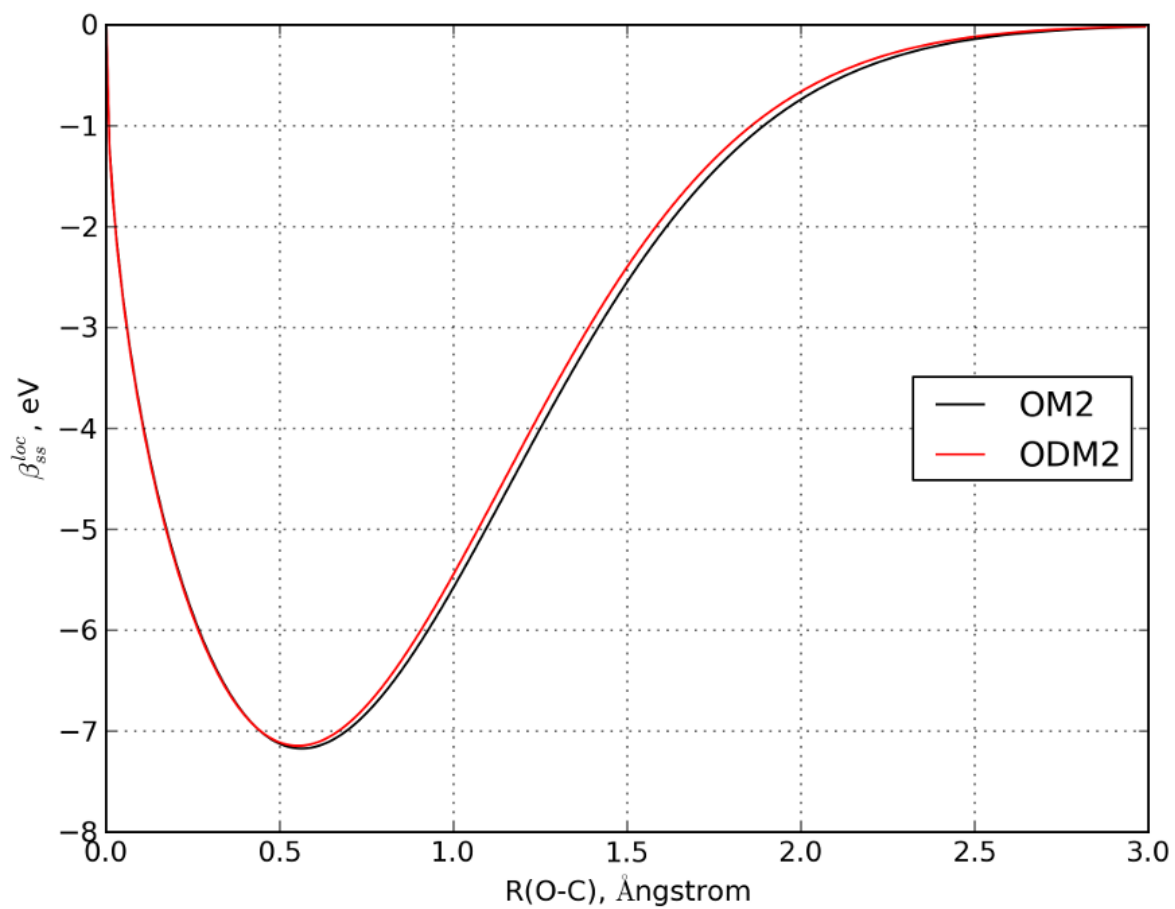

Figure S25: Comparison of  $ss$  local resonance integrals for the O–C pair calculated using standard OM2 and new ODM2 parameters.

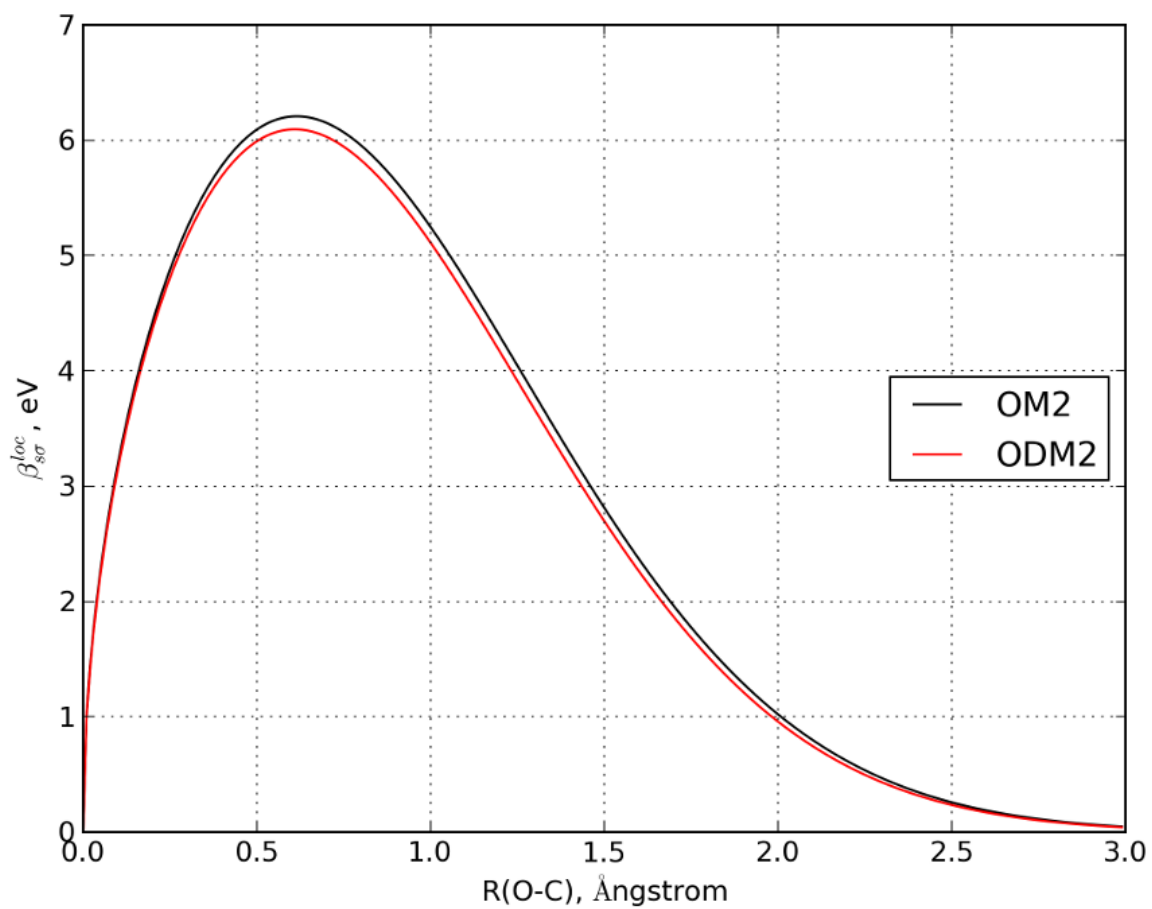

Figure S26: Comparison of  $s\sigma$  local resonance integrals for the O–C pair calculated using standard OM2 and new ODM2 parameters.

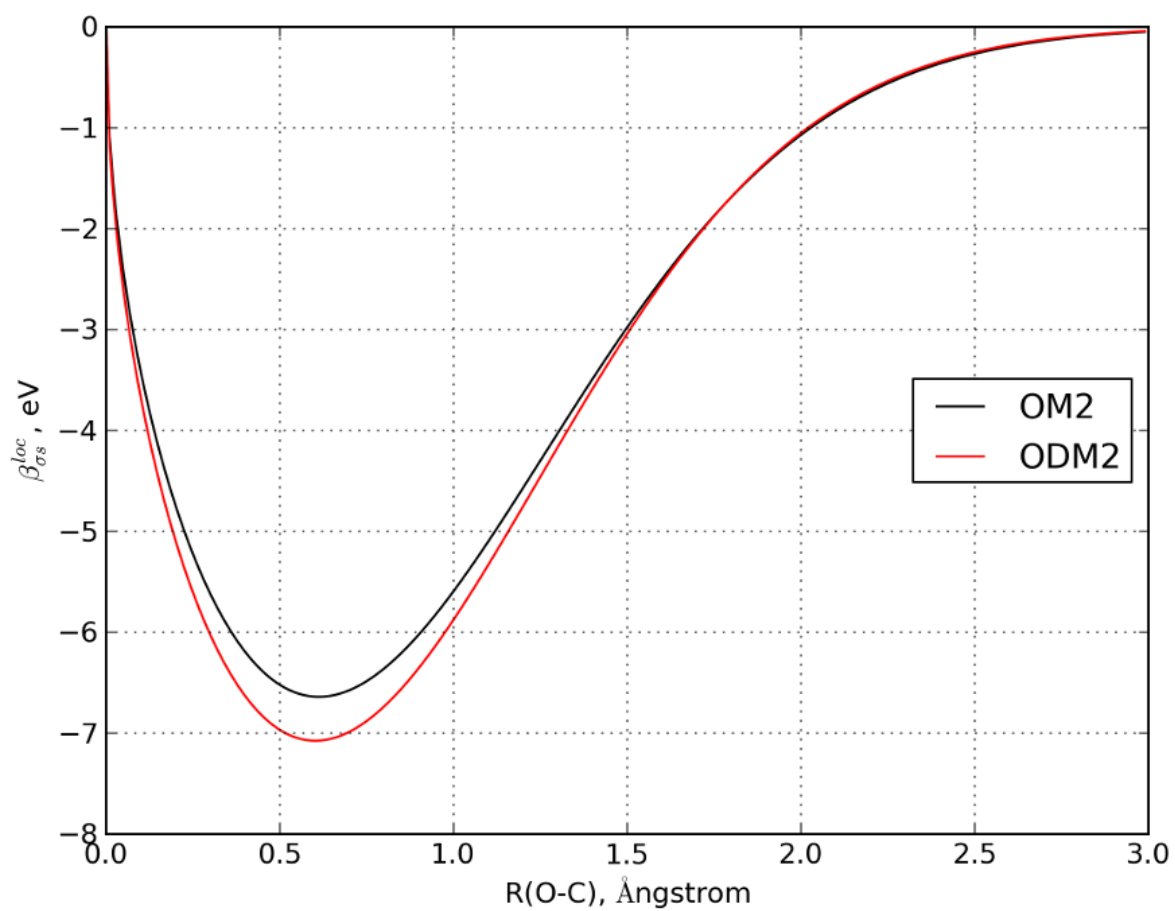

Figure S27: Comparison of  $\sigma s$  local resonance integrals for the O–C pair calculated using standard OM2 and new ODM2 parameters.

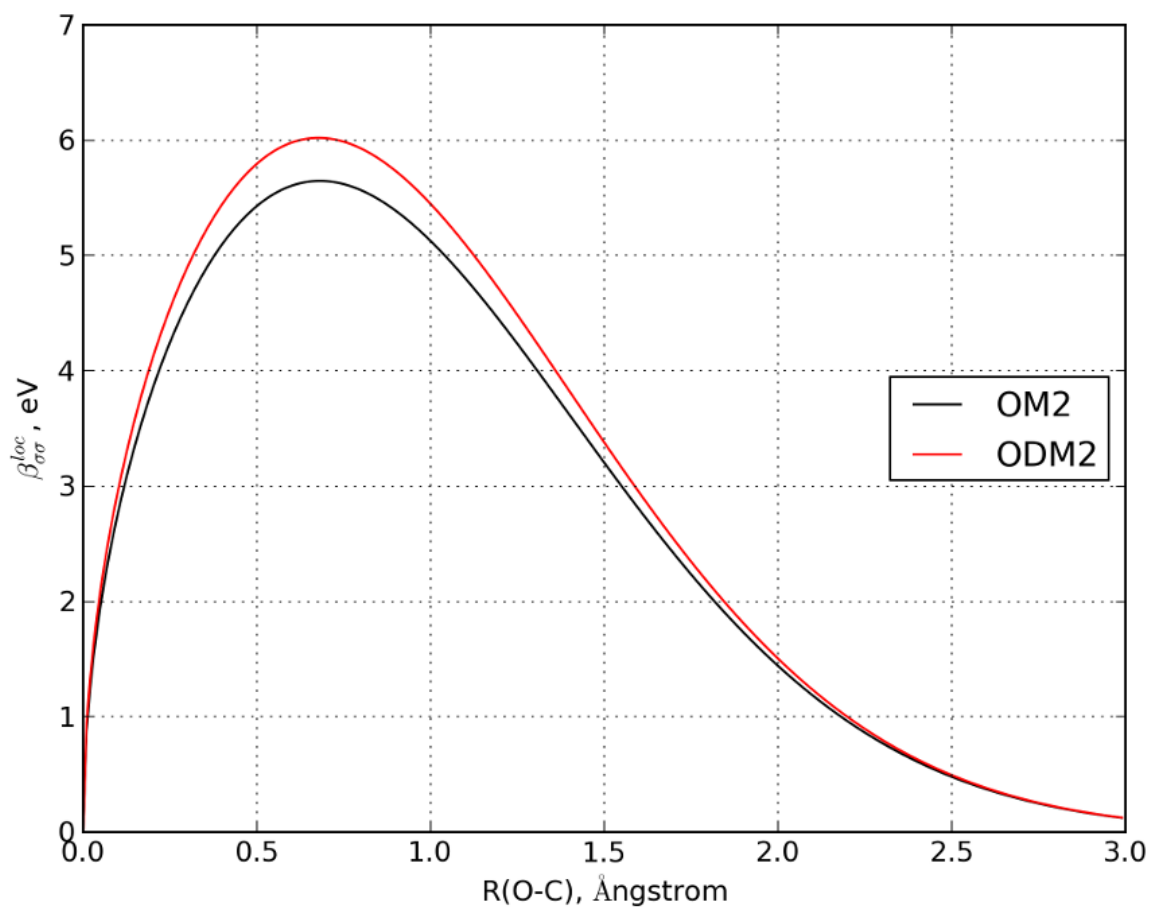

Figure S28: Comparison of  $\sigma\sigma$  local resonance integrals for the O–C pair calculated using standard OM2 and new ODM2 parameters.

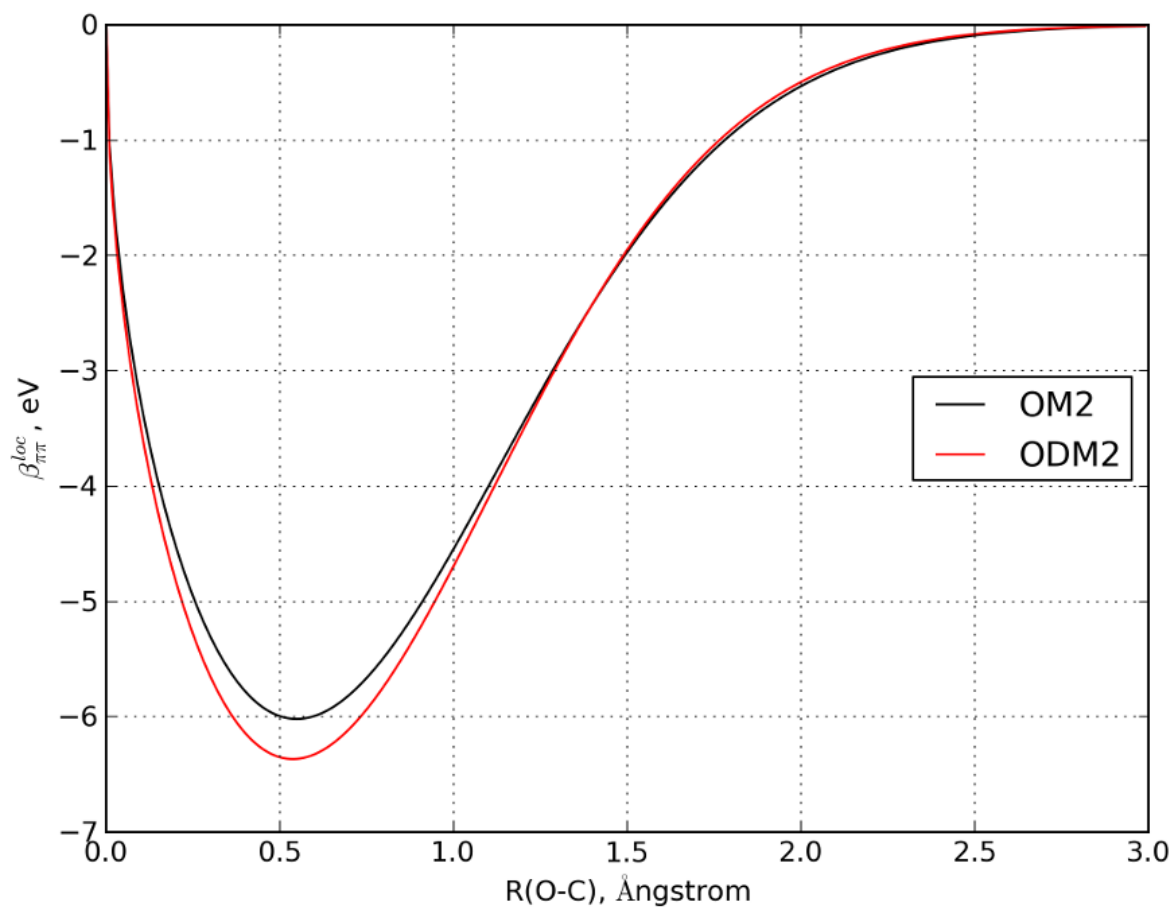

Figure S29: Comparison of  $\pi\pi$  local resonance integrals for the O–C pair calculated using standard OM2 and new ODM2 parameters.

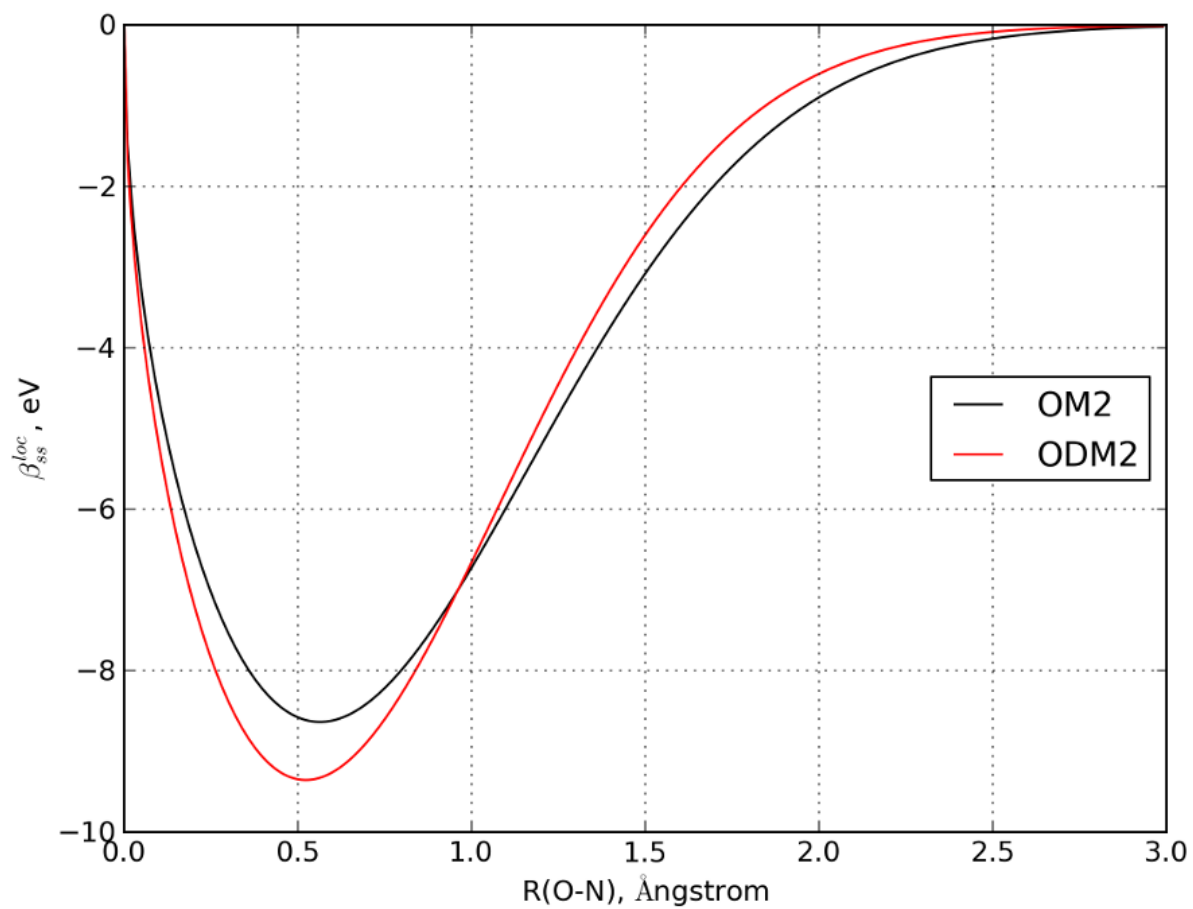

Figure S30: Comparison of  $ss$  local resonance integrals for the O–N pair calculated using standard OM2 and new ODM2 parameters.

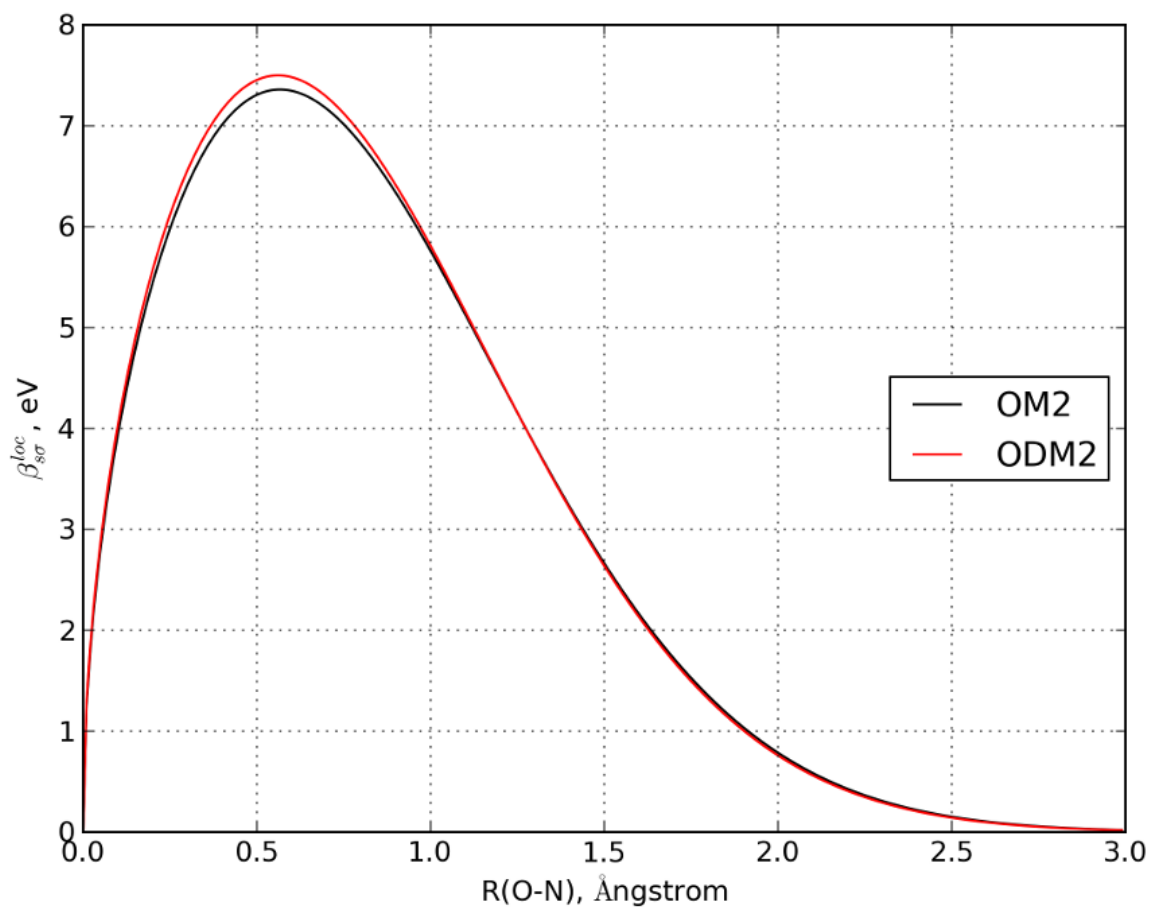

Figure S31: Comparison of  $s\sigma$  local resonance integrals for the O–N pair calculated using standard OM2 and new ODM2 parameters.

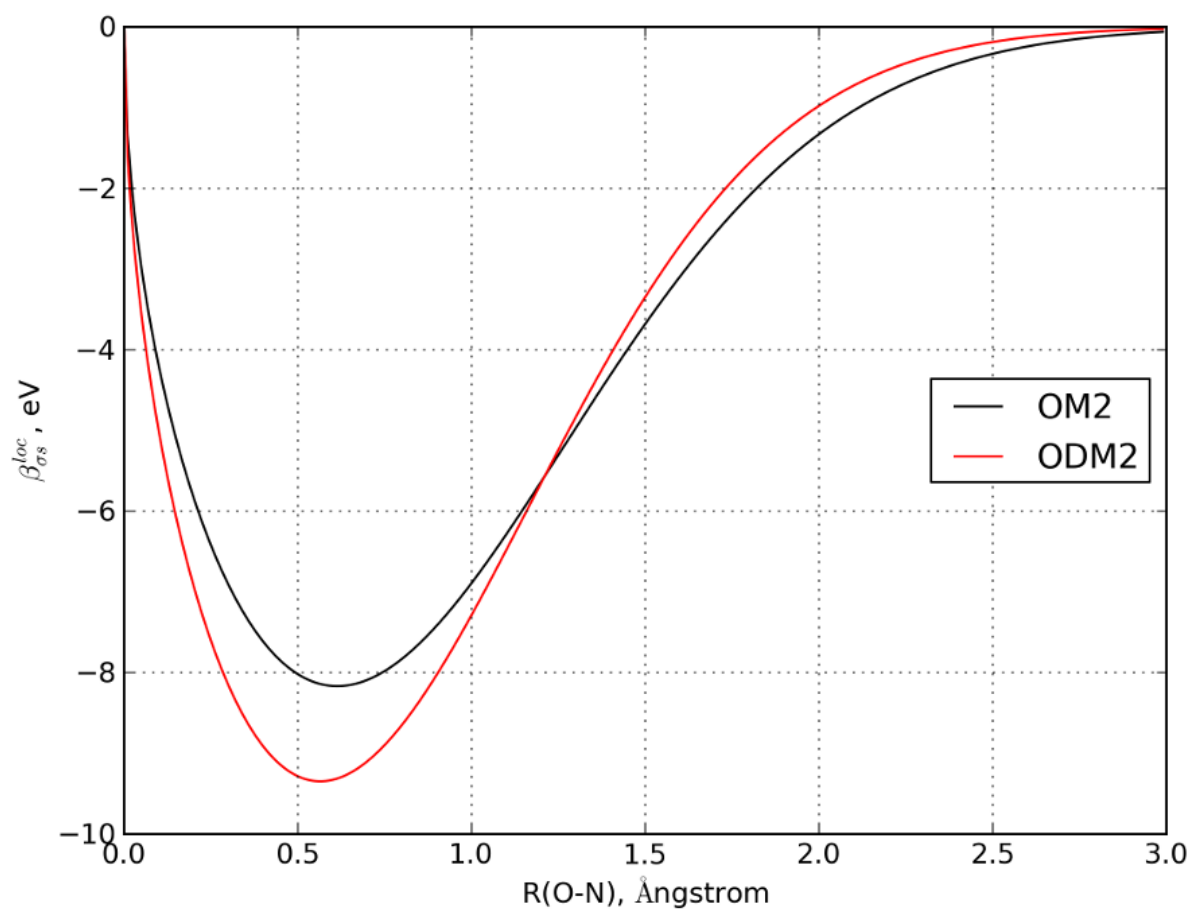

Figure S32: Comparison of  $\sigma_s$  local resonance integrals for the O–N pair calculated using standard OM2 and new ODM2 parameters.



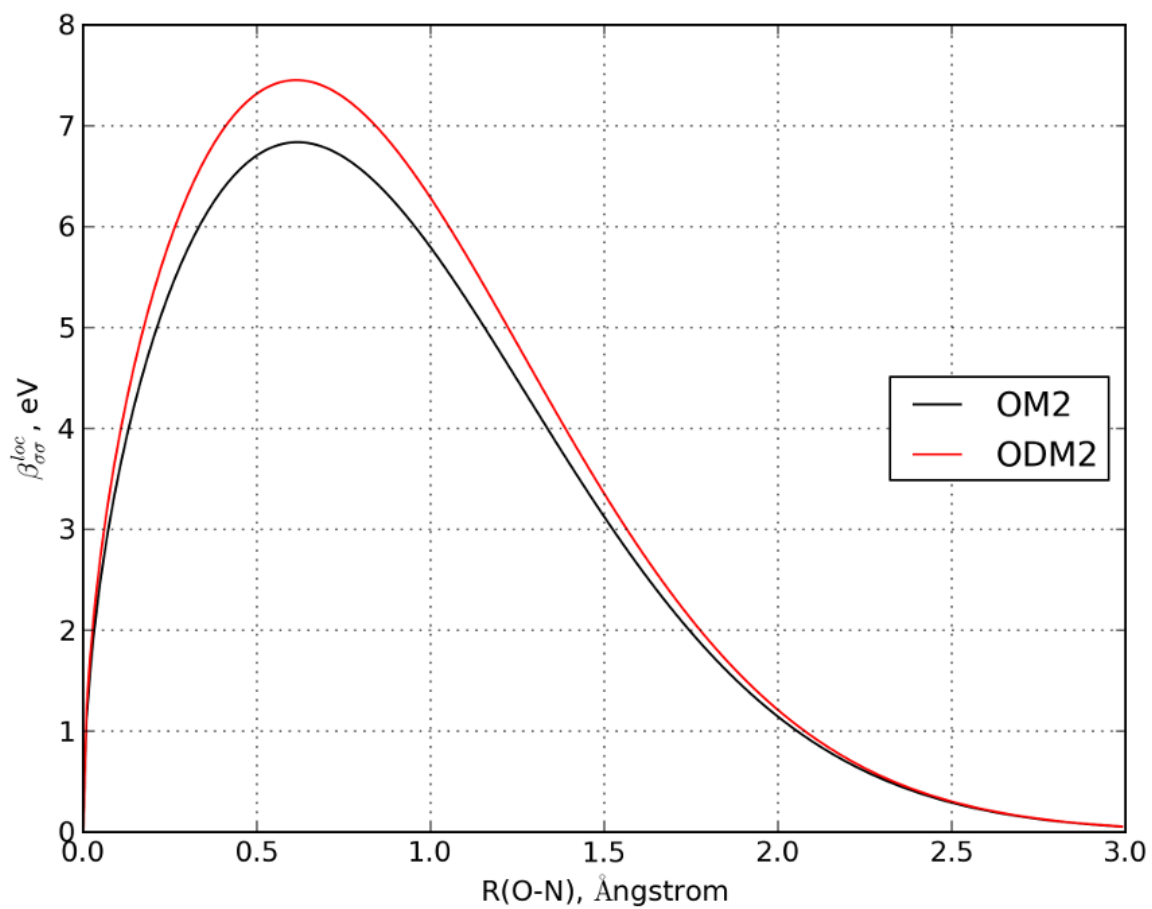

Figure S33: Comparison of  $\sigma\sigma$  local resonance integrals for the O–N pair calculated using standard OM2 and new ODM2 parameters.

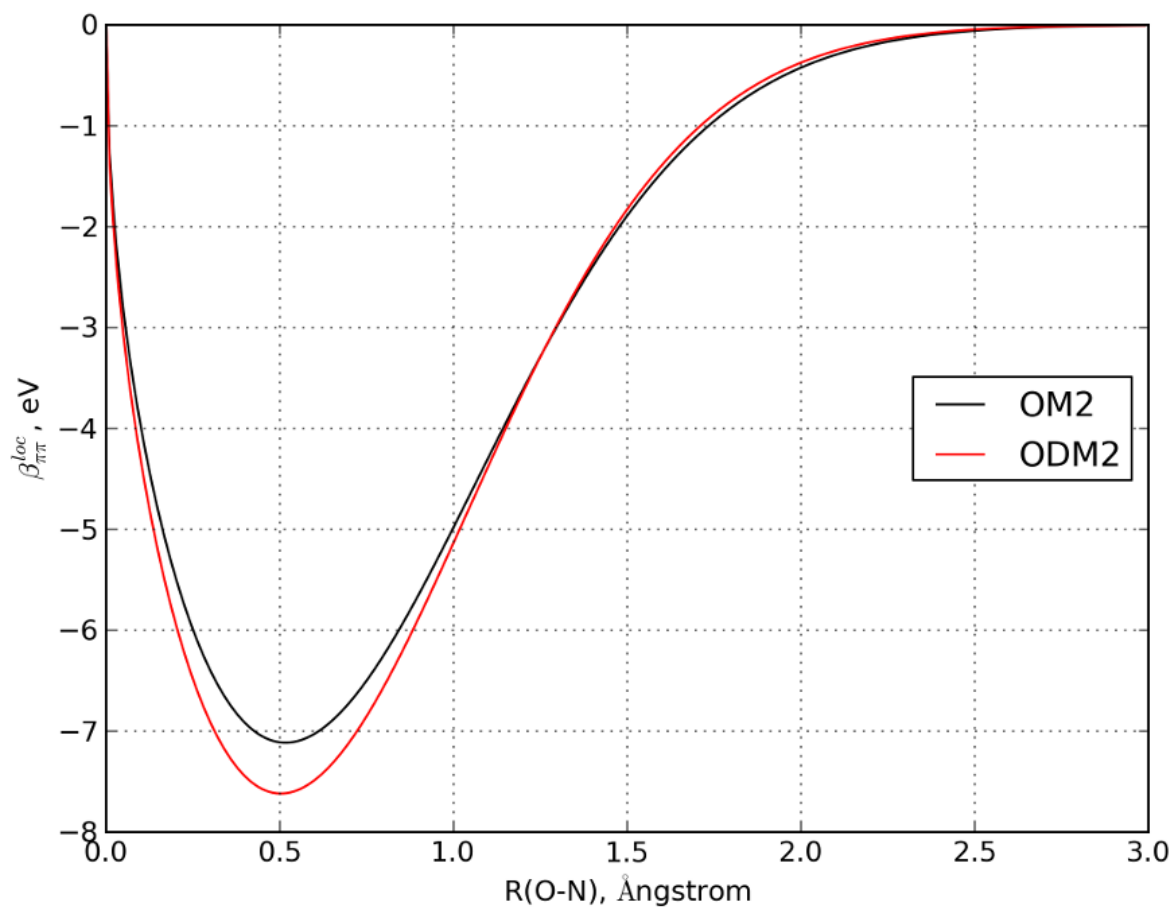

Figure S34: Comparison of  $\pi\pi$  local resonance integrals for the O–N pair calculated using standard OM2 and new ODM2 parameters.

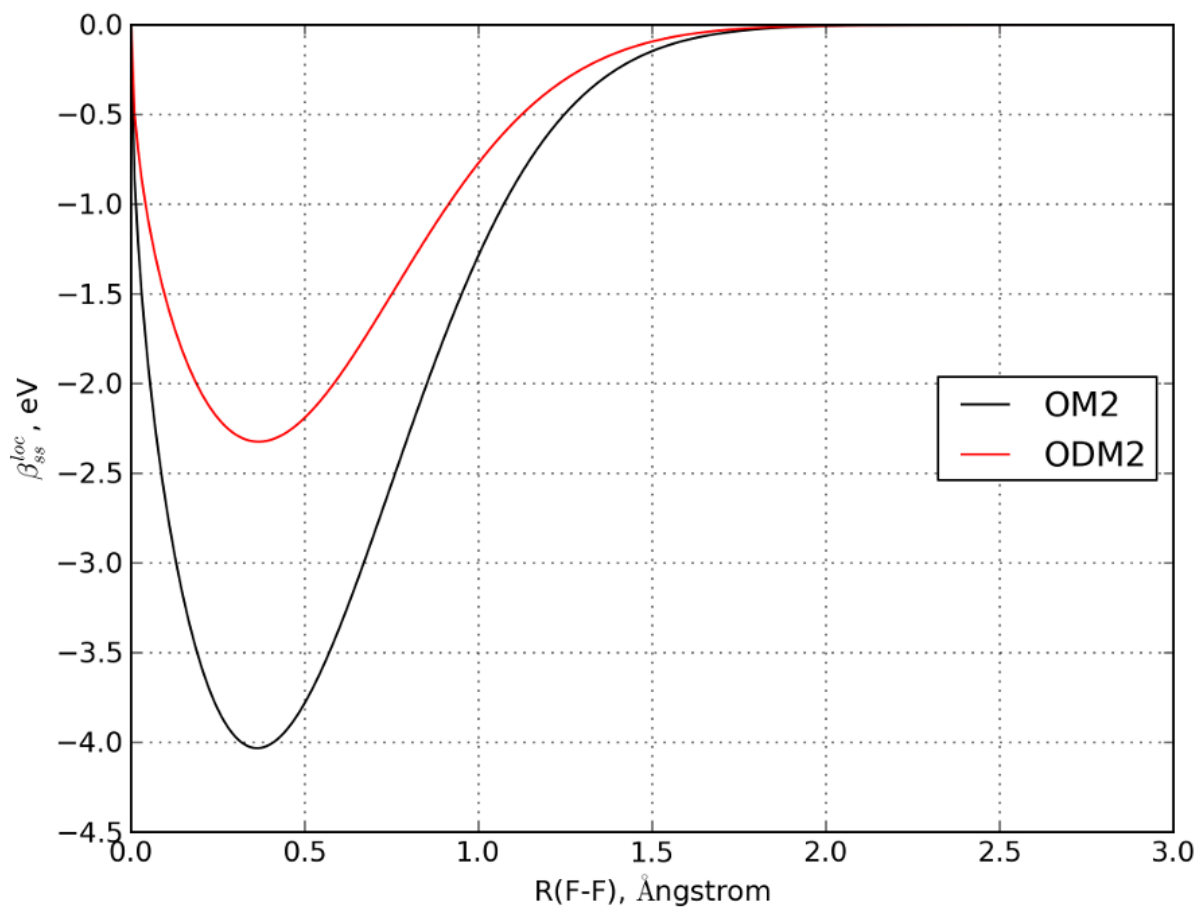

Figure S35: Comparison of  $ss$  local resonance integrals for the F–F pair calculated using standard OM2 and new ODM2 parameters.

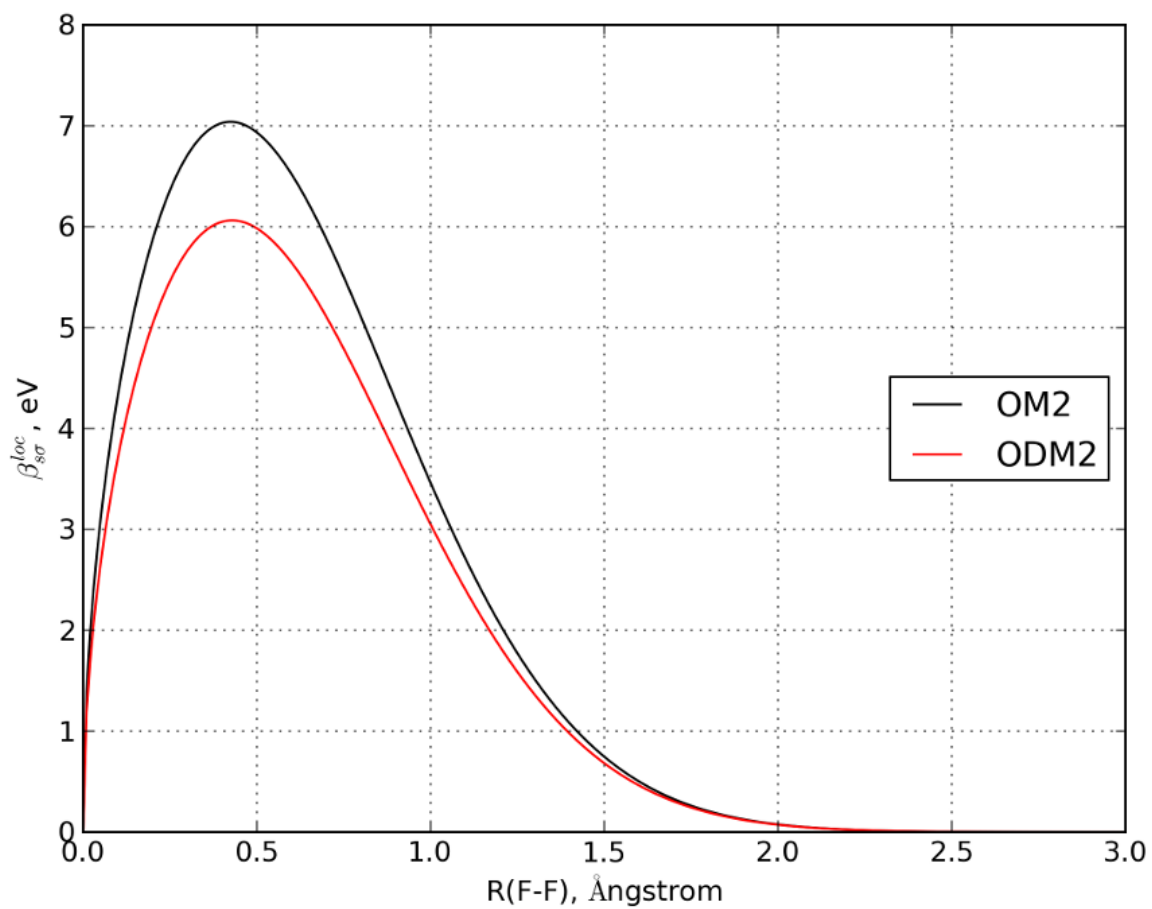

Figure S36: Comparison of  $\sigma$  local resonance integrals for the F–F pair calculated using standard OM2 and new ODM2 parameters.

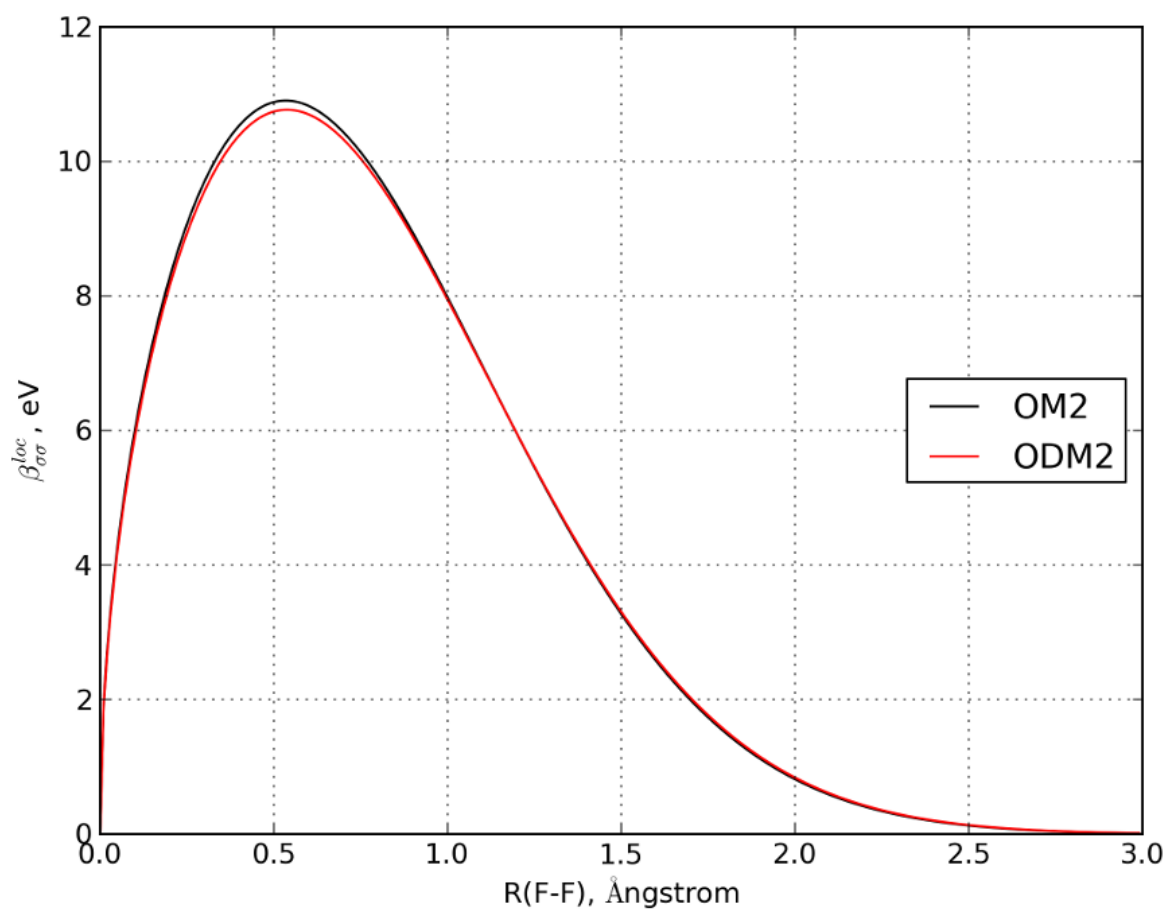

Figure S37: Comparison of  $\sigma\sigma$  local resonance integrals for the F–F pair calculated using standard OM2 and new ODM2 parameters.

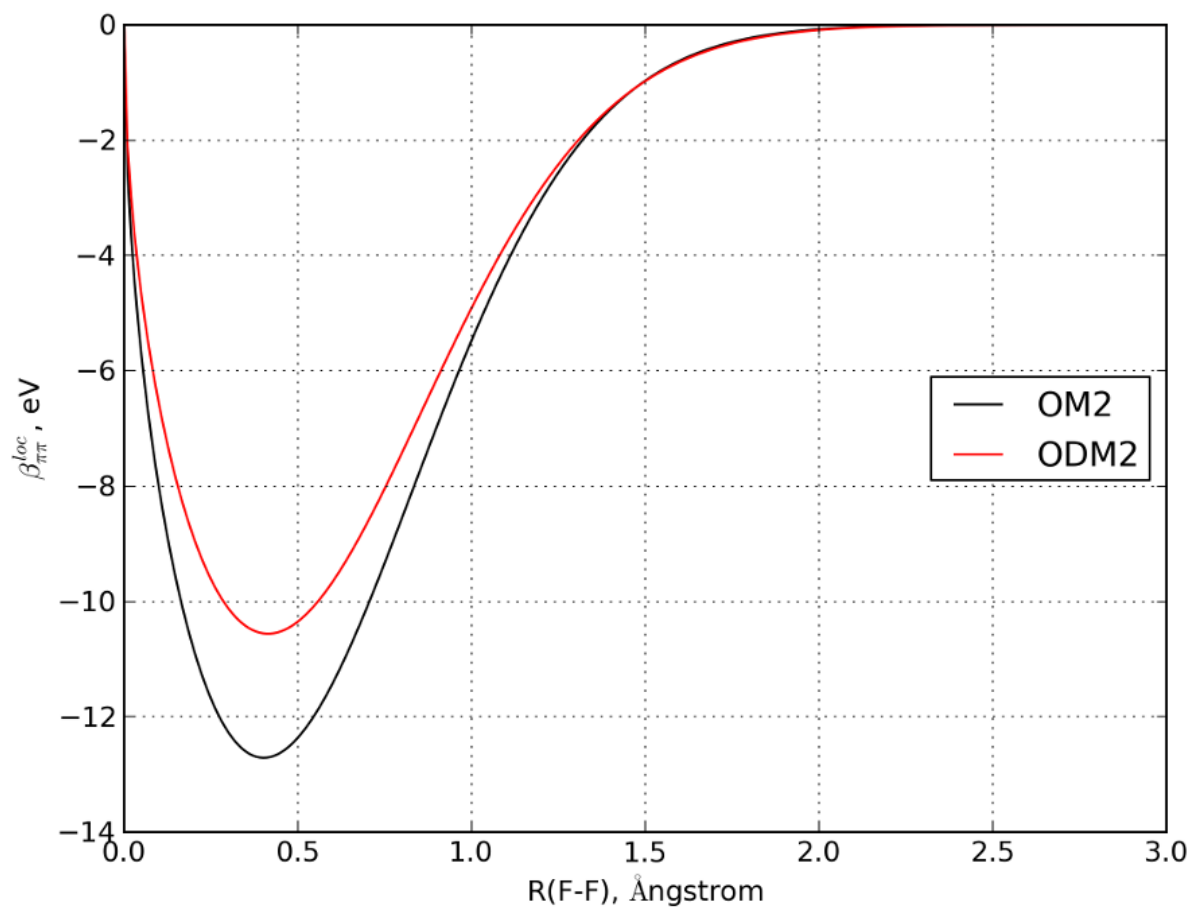

Figure S38: Comparison of  $\pi\pi$  local resonance integrals for the F–F pair calculated using standard OM2 and new ODM2 parameters.

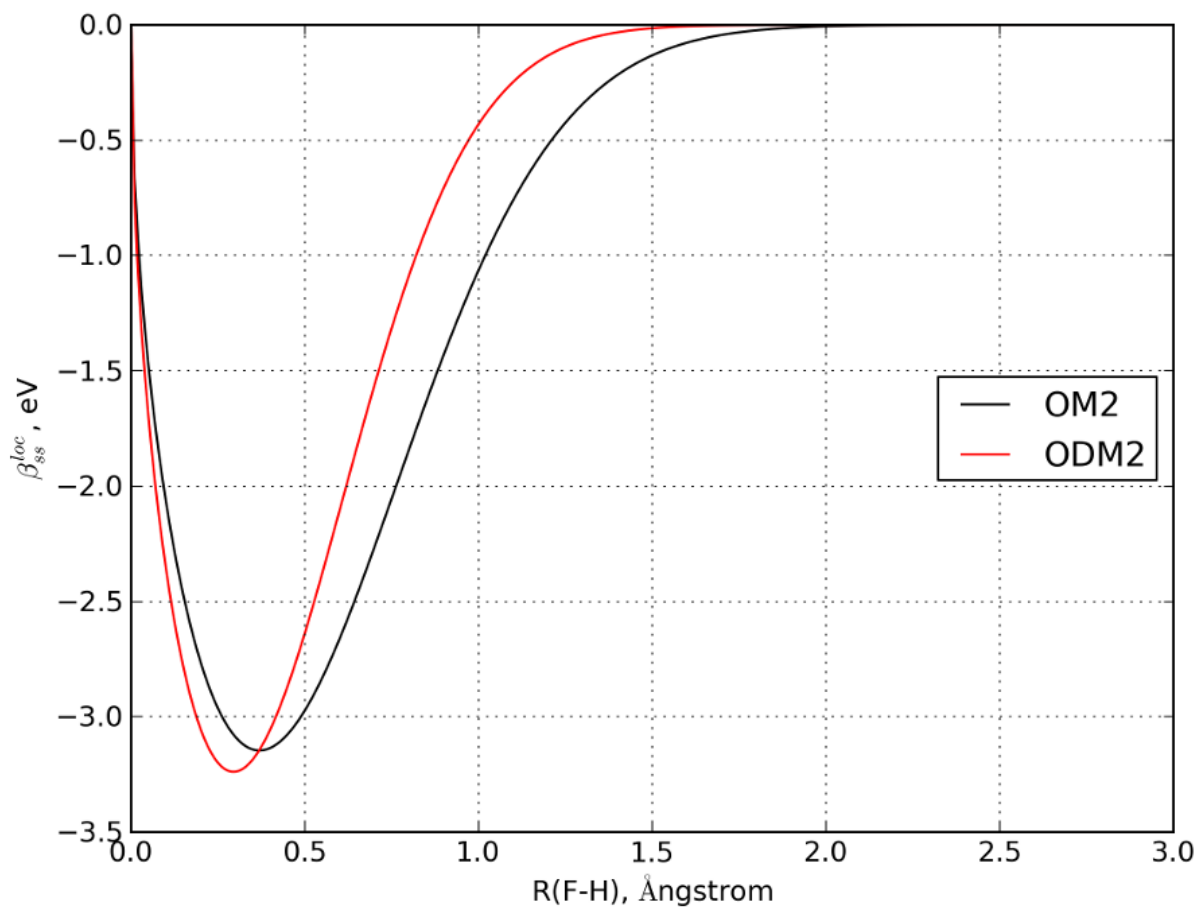

Figure S39: Comparison of  $ss$  local resonance integrals for the F–H pair calculated using standard OM2 and new ODM2 parameters.

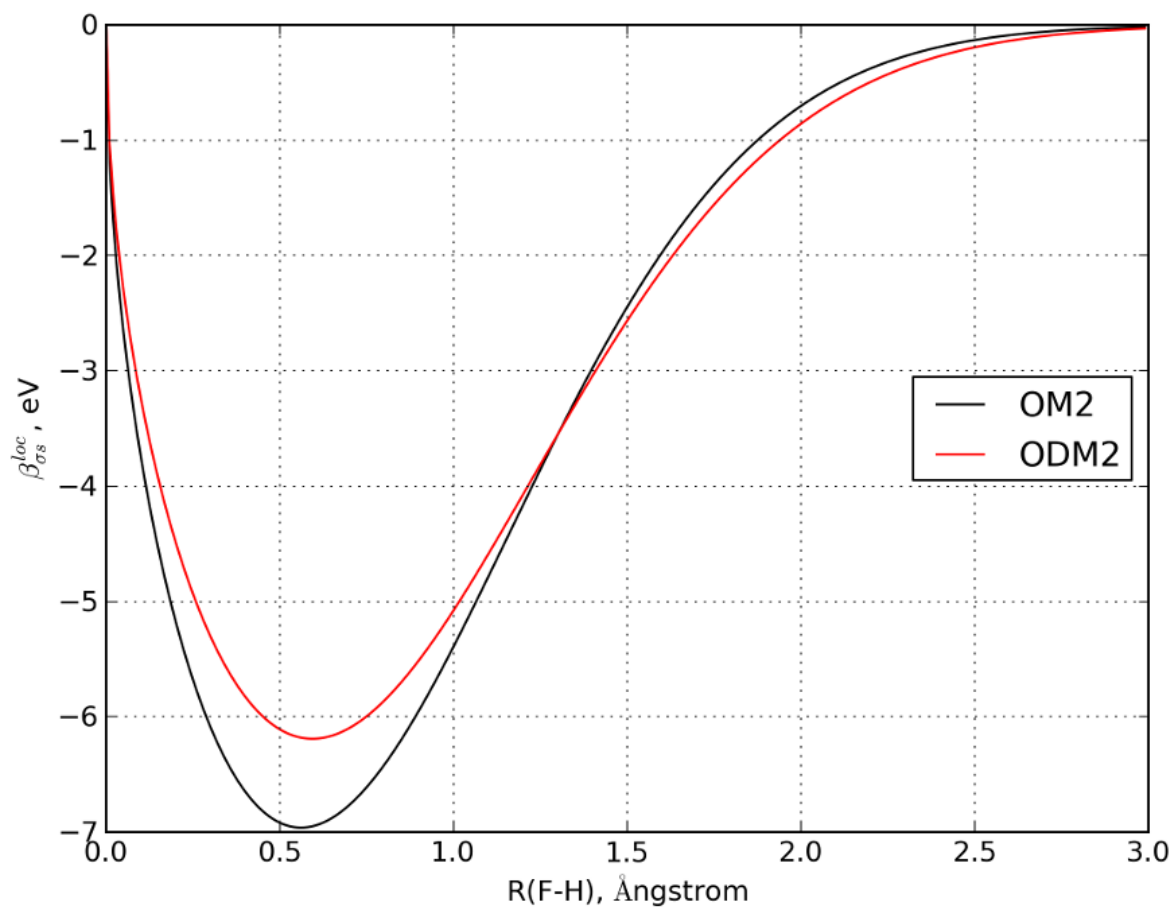

Figure S40: Comparison of  $\sigma s$  local resonance integrals for the F–H pair calculated using standard OM2 and new ODM2 parameters.



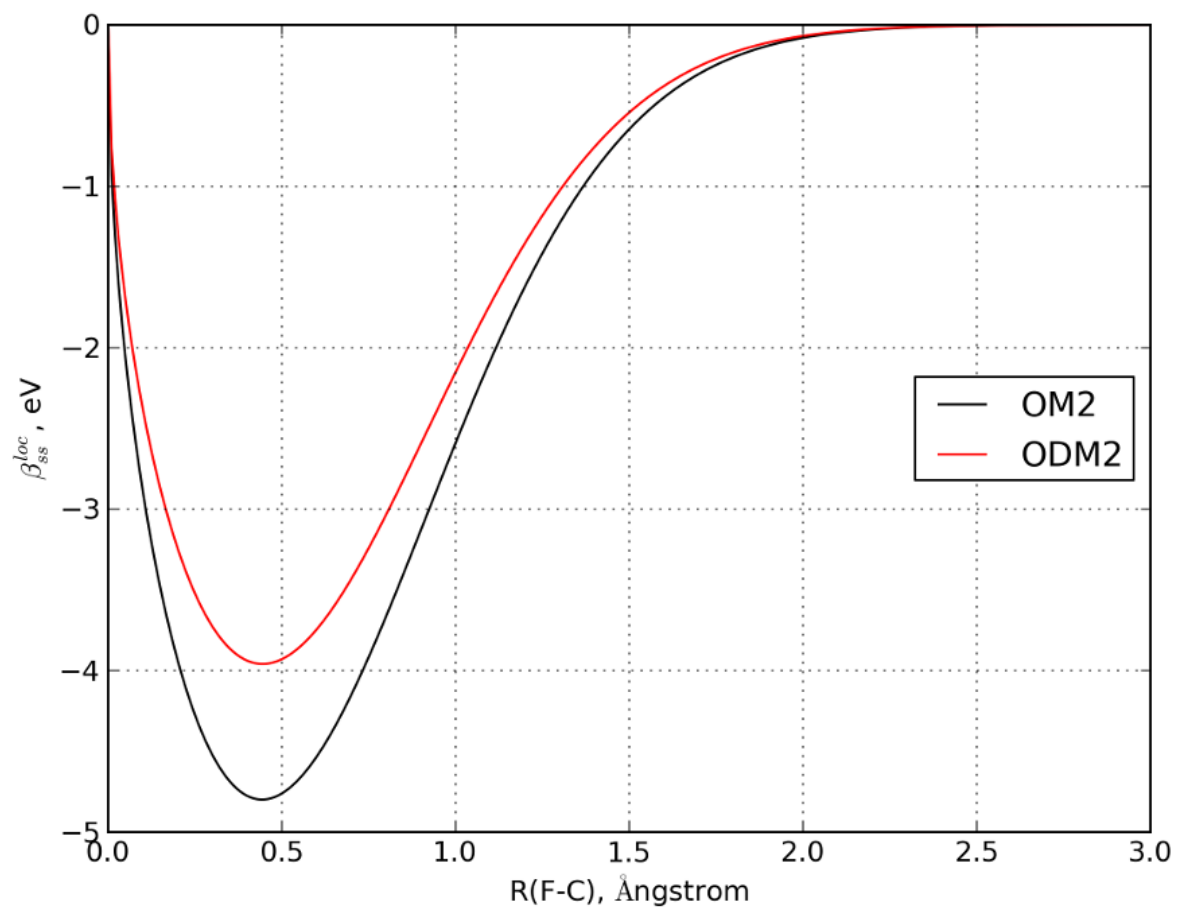

Figure S41: Comparison of  $ss$  local resonance integrals for the F–C pair calculated using standard OM2 and new ODM2 parameters.

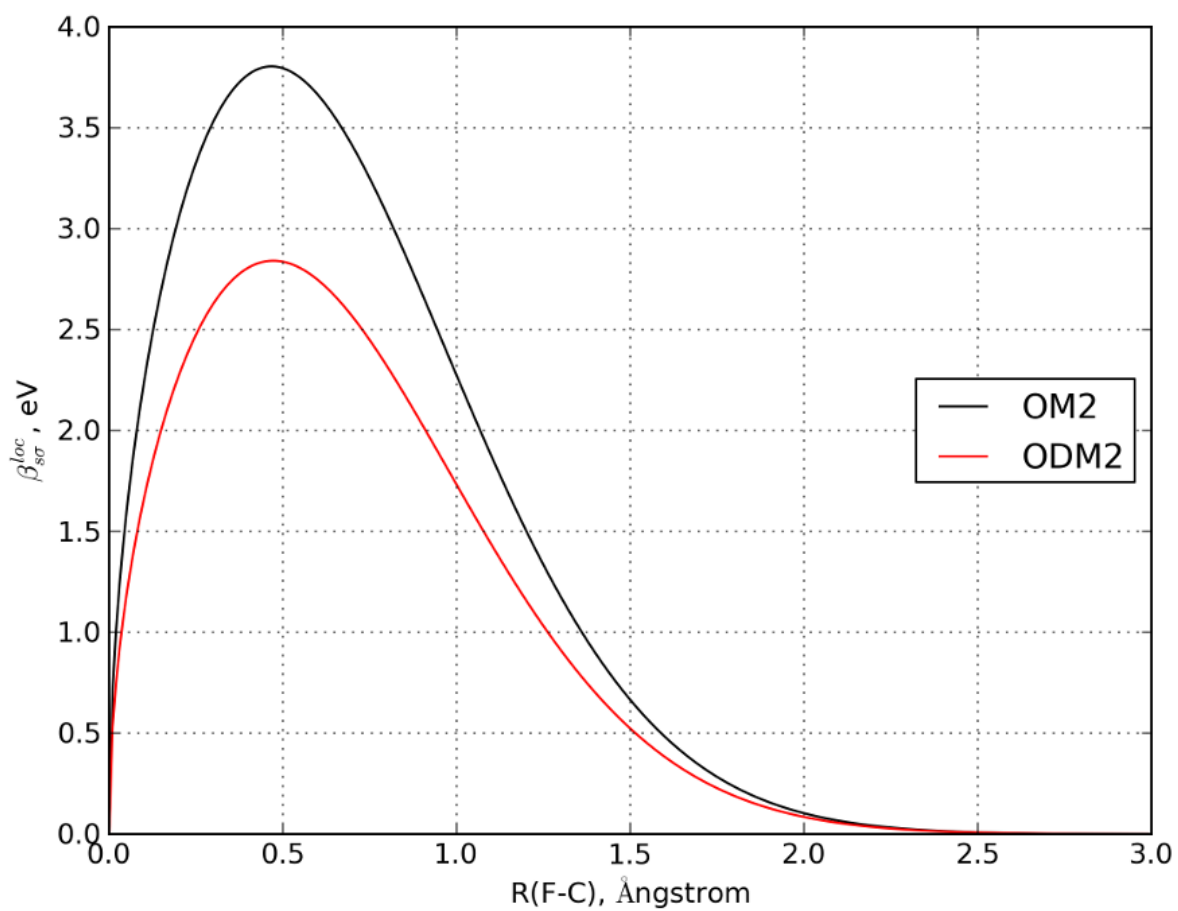

Figure S42: Comparison of  $s\sigma$  local resonance integrals for the F–C pair calculated using standard OM2 and new ODM2 parameters.

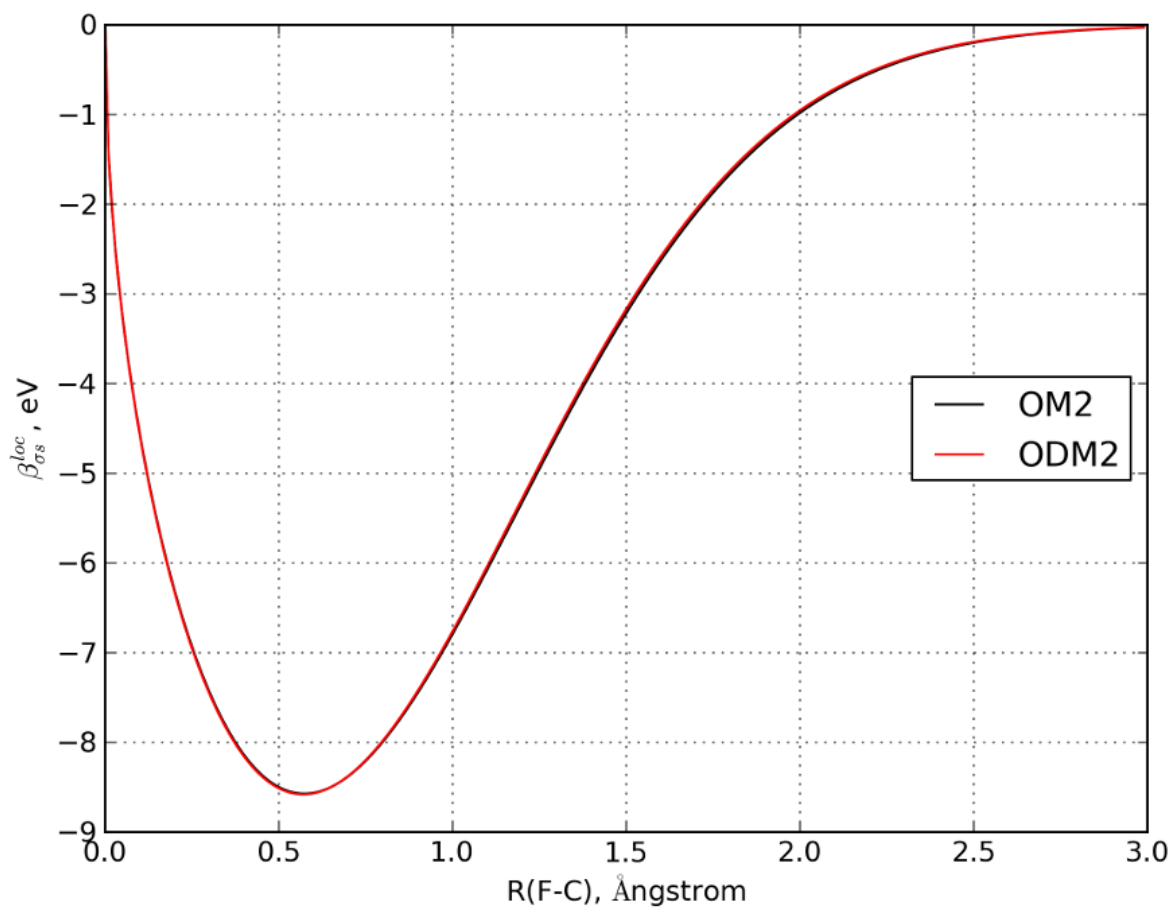

Figure S43: Comparison of  $\sigma s$  local resonance integrals for the F–C pair calculated using standard OM2 and new ODM2 parameters.

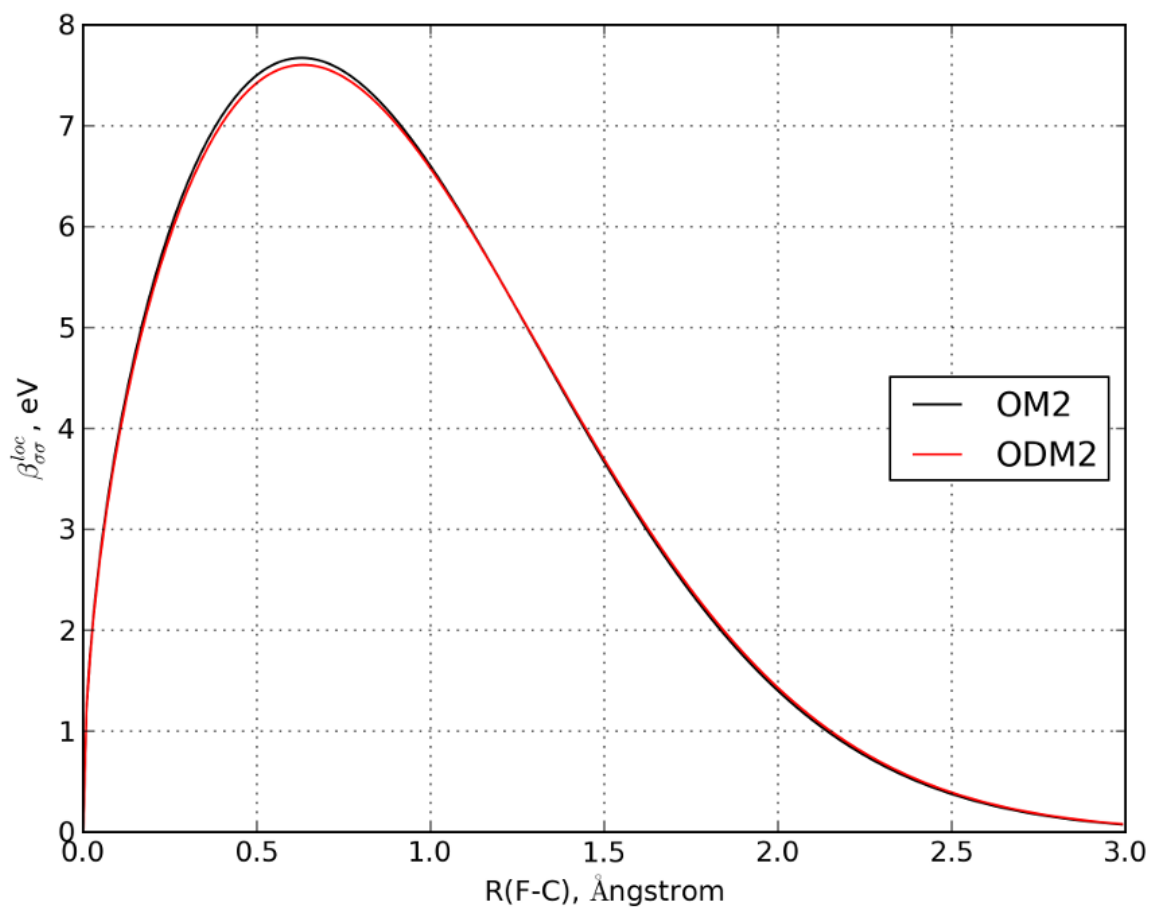

Figure S44: Comparison of  $\sigma\sigma$  local resonance integrals for the F–C pair calculated using standard OM2 and new ODM2 parameters.

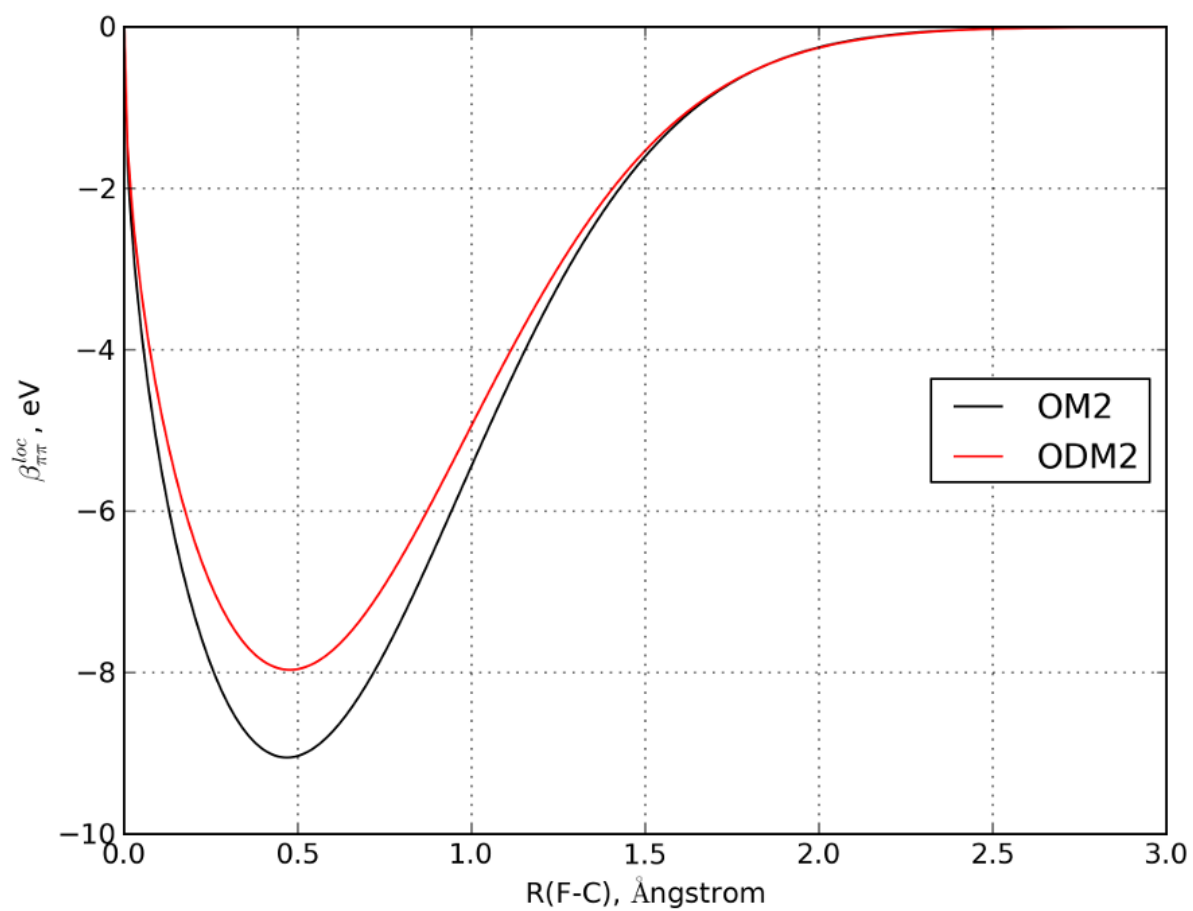

Figure S45: Comparison of  $\pi\pi$  local resonance integrals for the F–C pair calculated using standard OM2 and new ODM2 parameters.

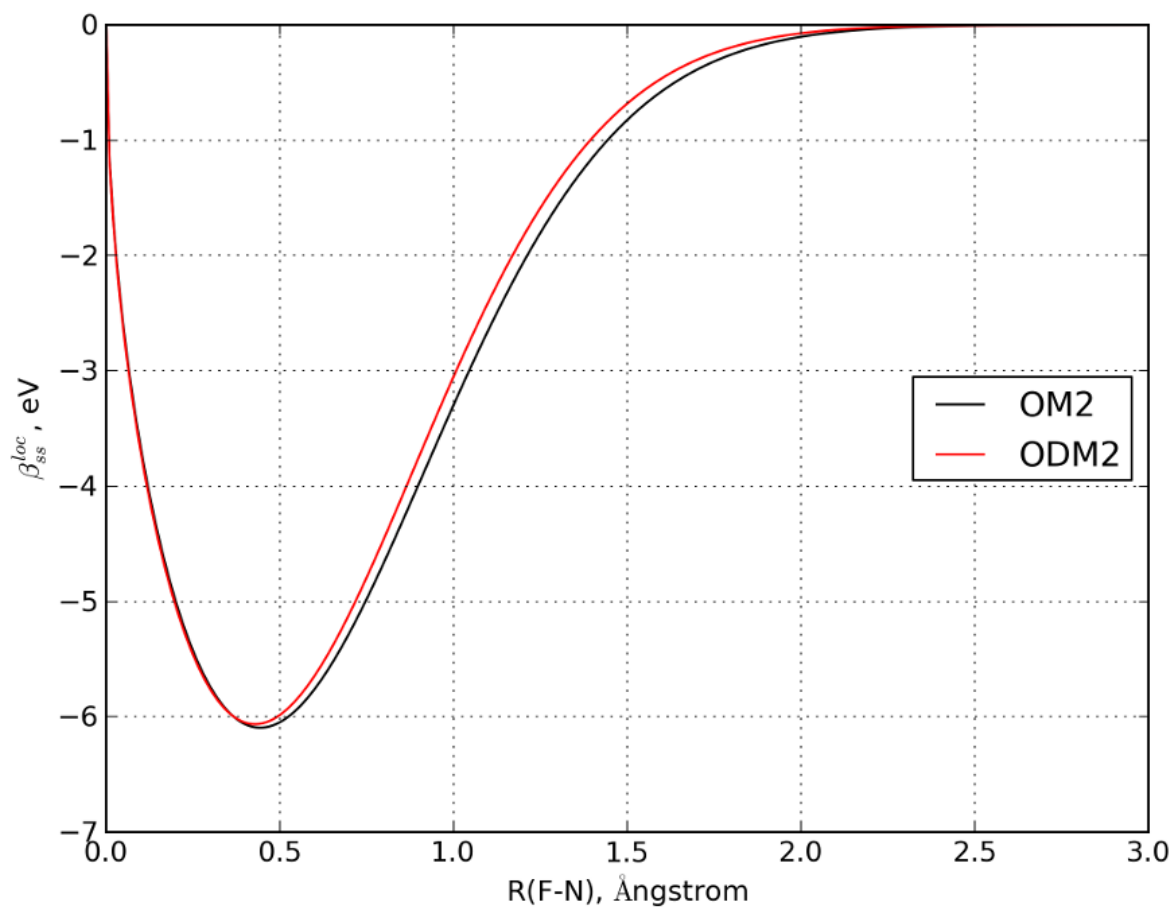

Figure S46: Comparison of  $ss$  local resonance integrals for the F–N pair calculated using standard OM2 and new ODM2 parameters.

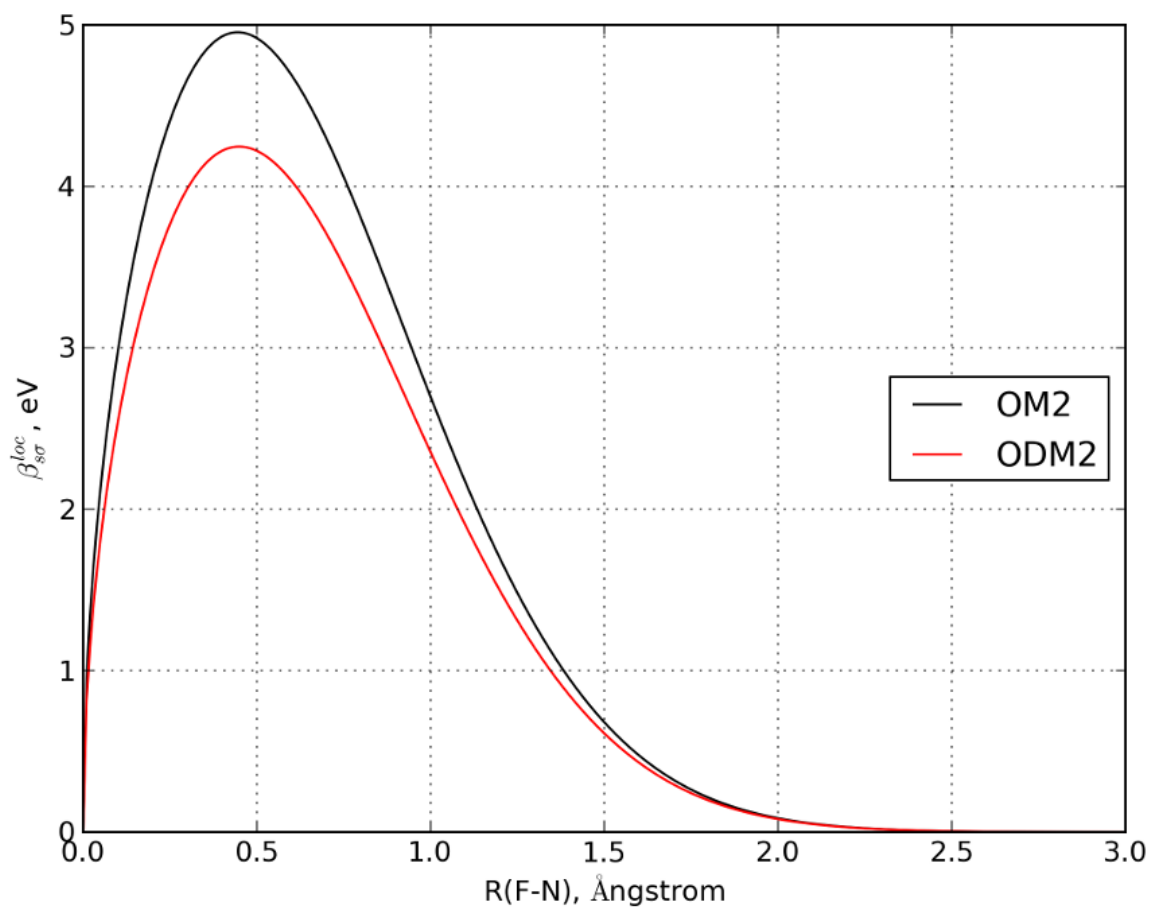

Figure S47: Comparison of  $s\sigma$  local resonance integrals for the F–N pair calculated using standard OM2 and new ODM2 parameters.

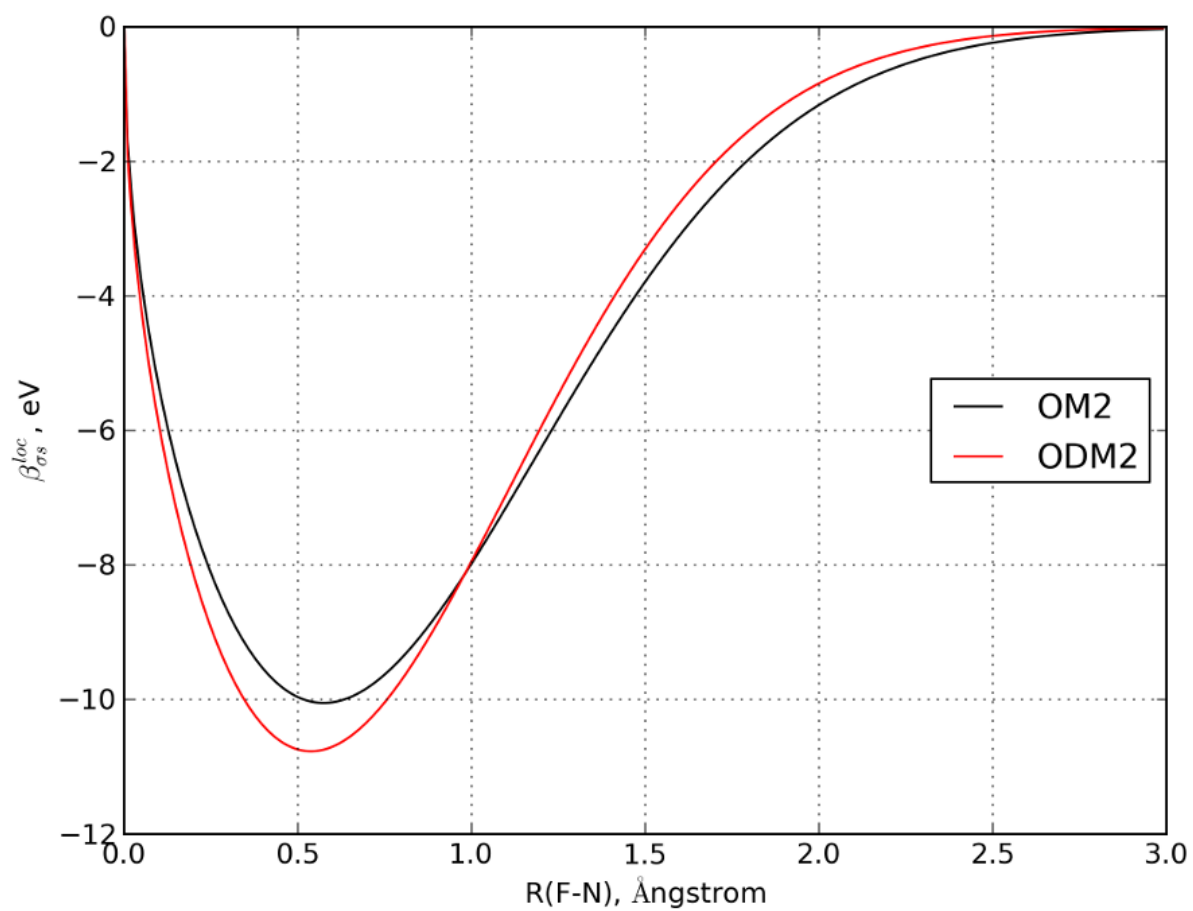

Figure S48: Comparison of  $\sigma s$  local resonance integrals for the F–N pair calculated using standard OM2 and new ODM2 parameters.



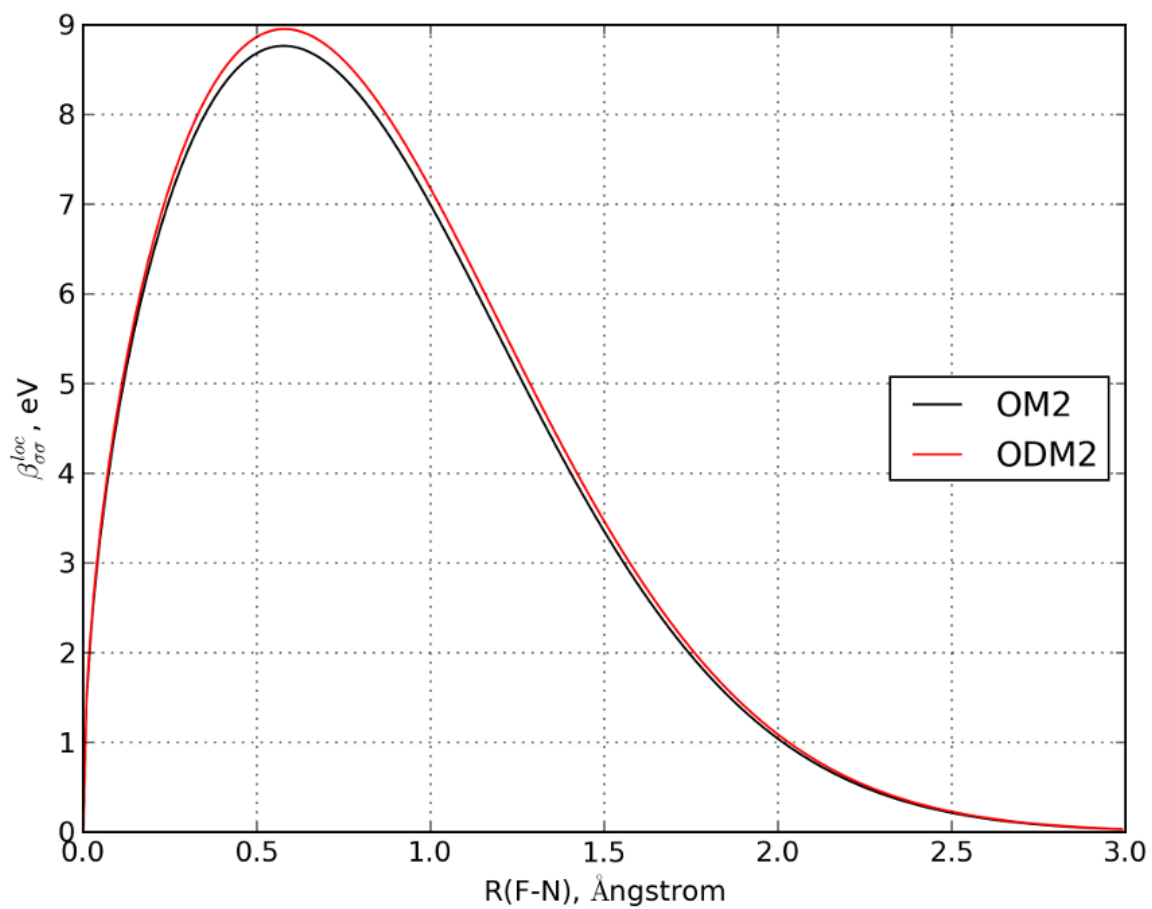

Figure S49: Comparison of  $\sigma\sigma$  local resonance integrals for the F–N pair calculated using standard OM2 and new ODM2 parameters.

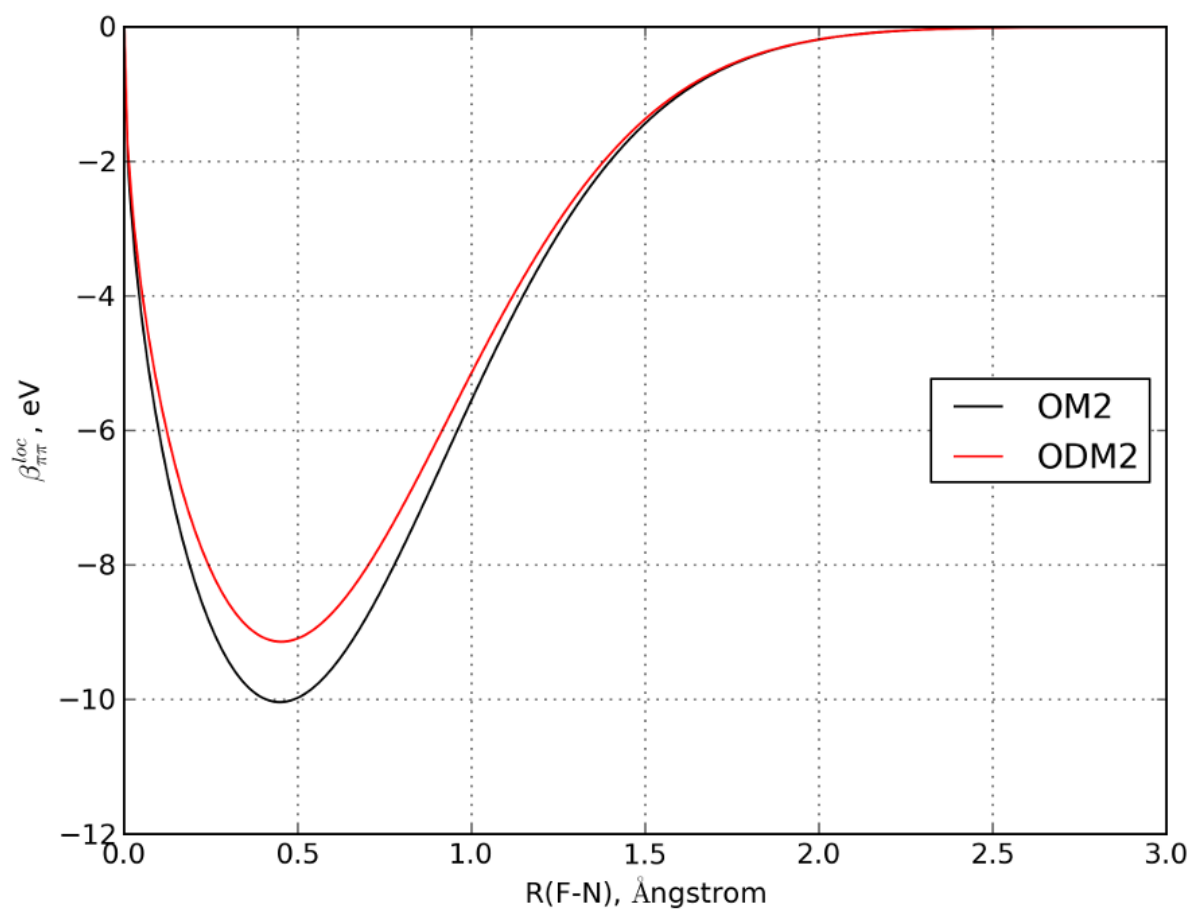

Figure S50: Comparison of  $\pi\pi$  local resonance integrals for the F–N pair calculated using standard OM2 and new ODM2 parameters.

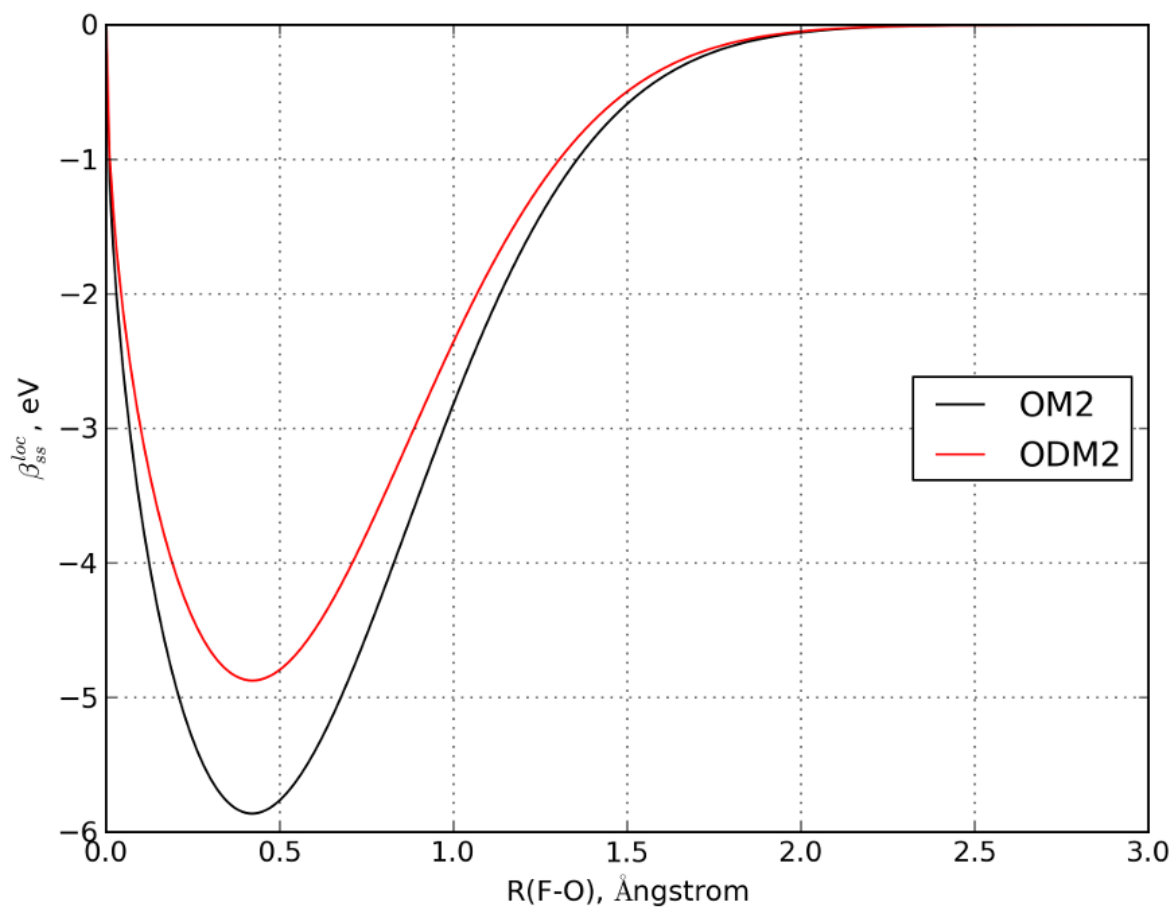

Figure S51: Comparison of  $ss$  local resonance integrals for the F–O pair calculated using standard OM2 and new ODM2 parameters.

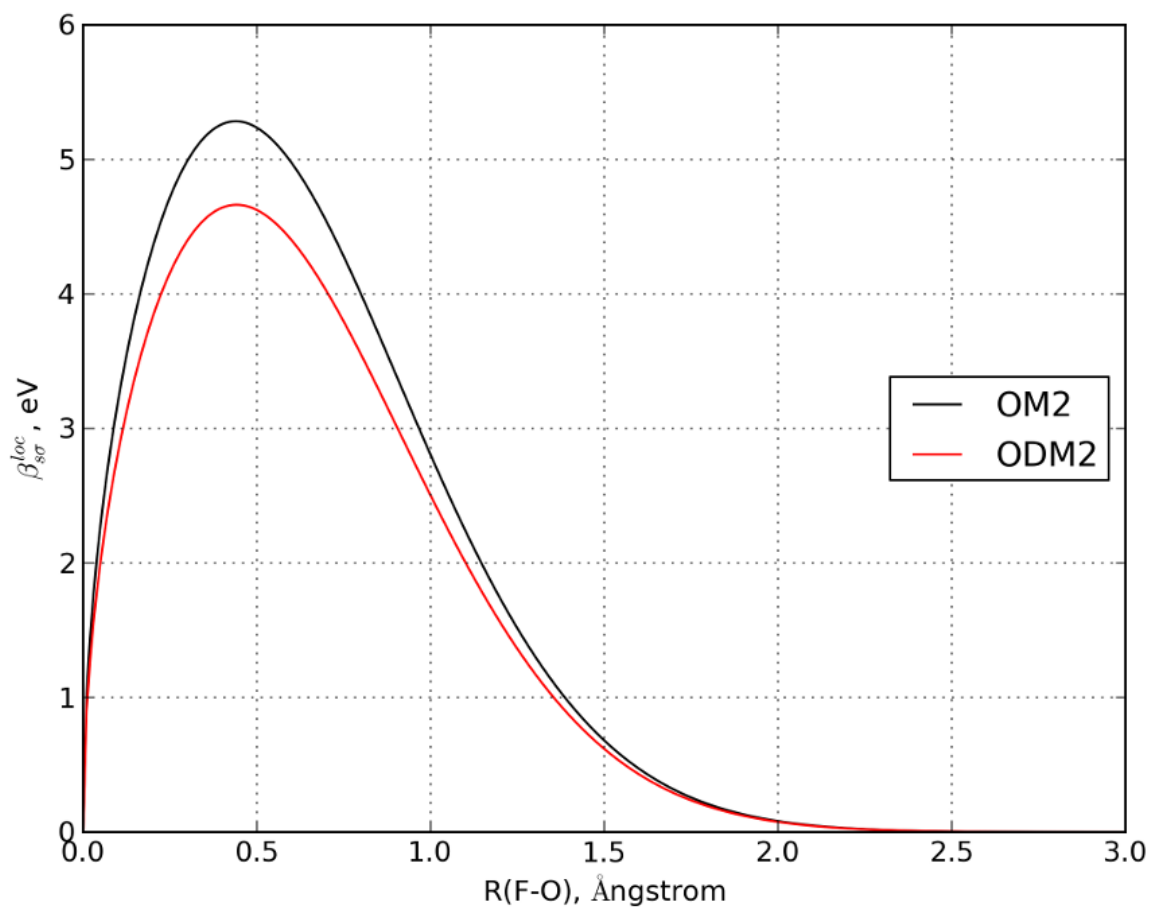

Figure S52: Comparison of  $\sigma$  local resonance integrals for the F–O pair calculated using standard OM2 and new ODM2 parameters.

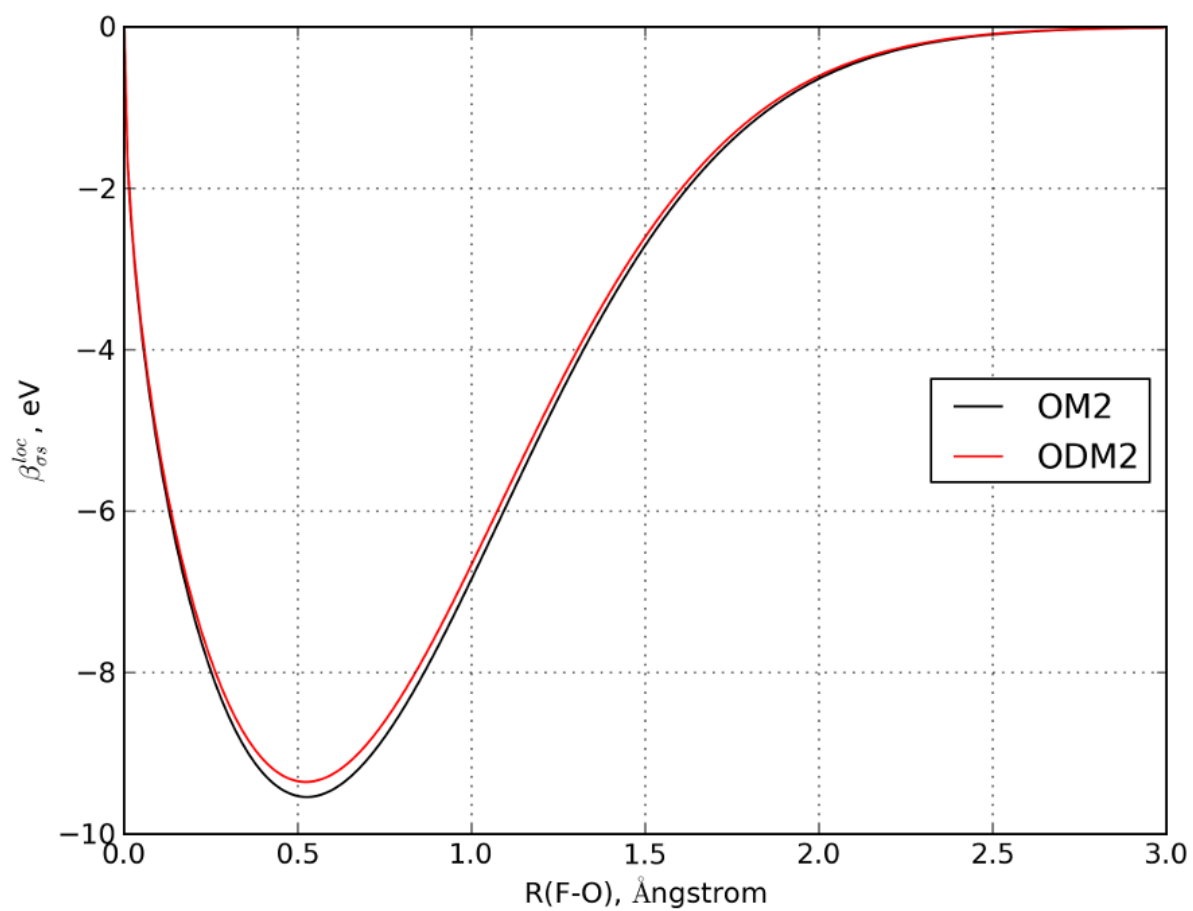

Figure S53: Comparison of  $\sigma s$  local resonance integrals for the F–O pair calculated using standard OM2 and new ODM2 parameters.

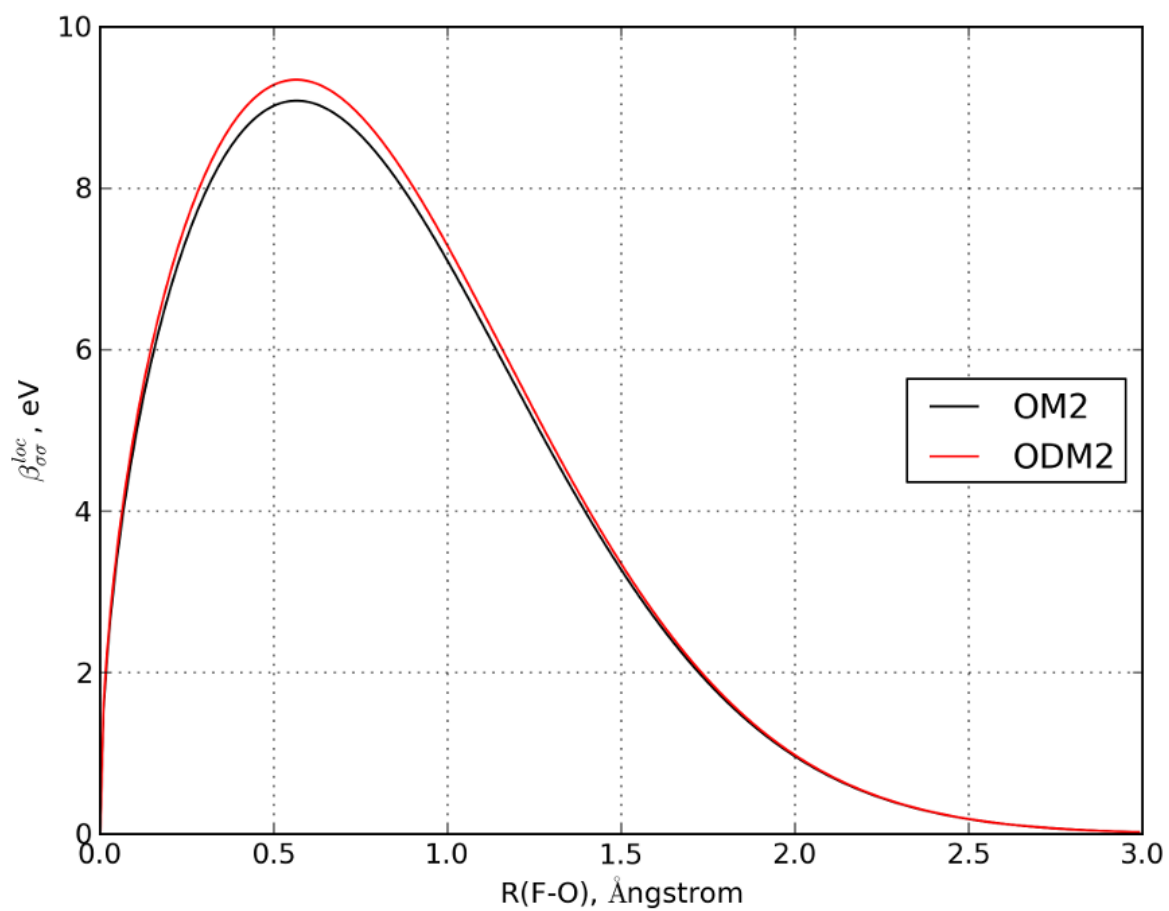

Figure S54: Comparison of  $\sigma\sigma$  local resonance integrals for the F–O pair calculated using standard OM2 and new ODM2 parameters.

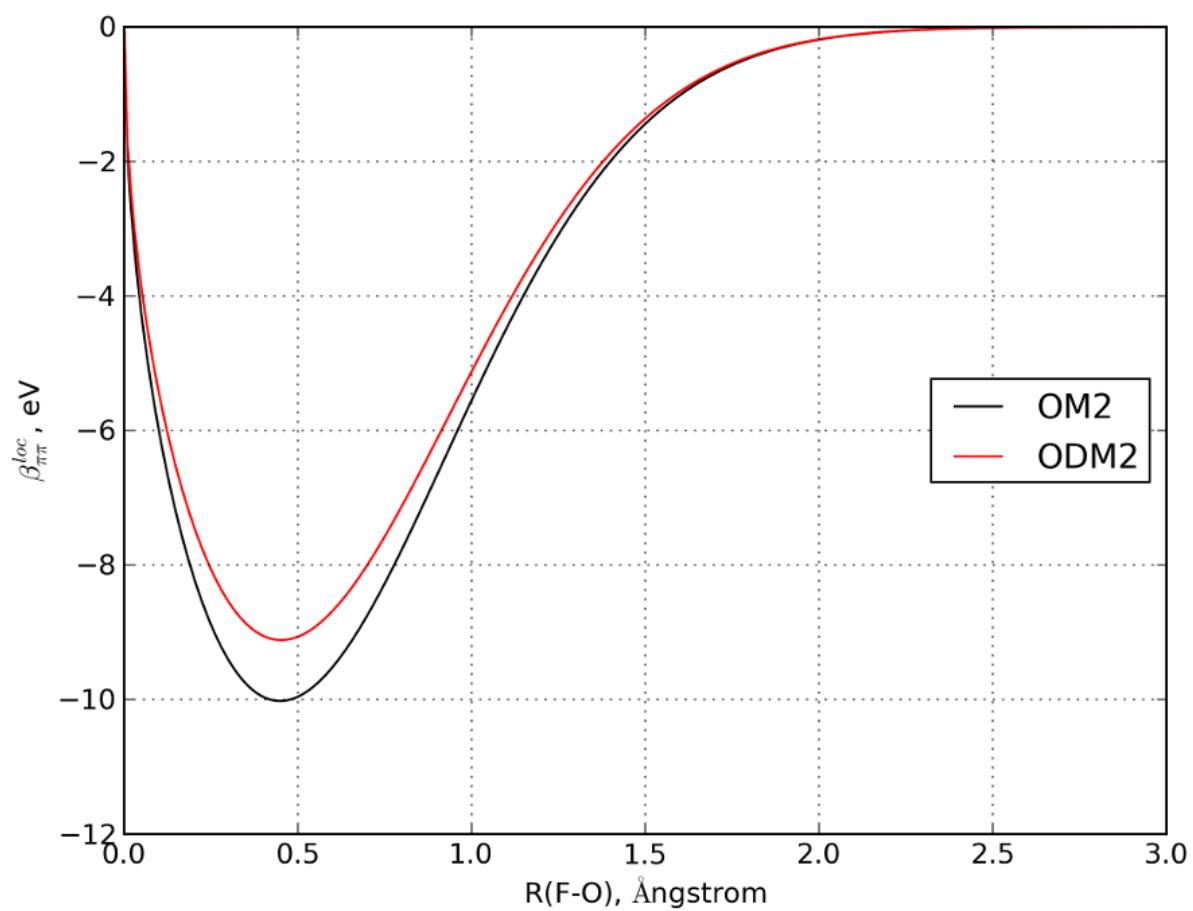

Figure S55: Comparison of  $\pi\pi$  local resonance integrals for the F–O pair calculated using standard OM2 and new ODM2 parameters.

## 2.2 ODM3 vs OM3

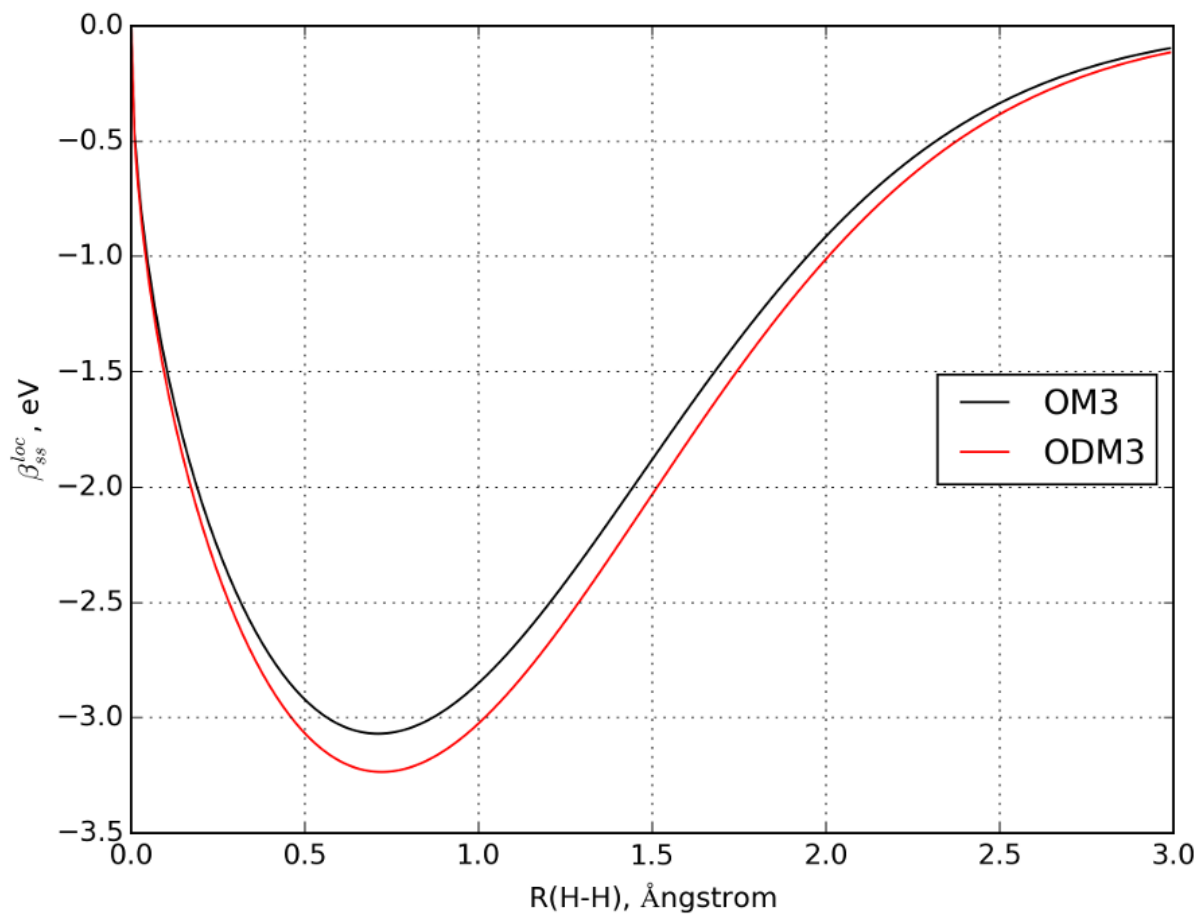

Figure S56: Comparison of  $ss$  local resonance integrals for the H–H pair calculated using standard OM3 and new ODM3 parameters.



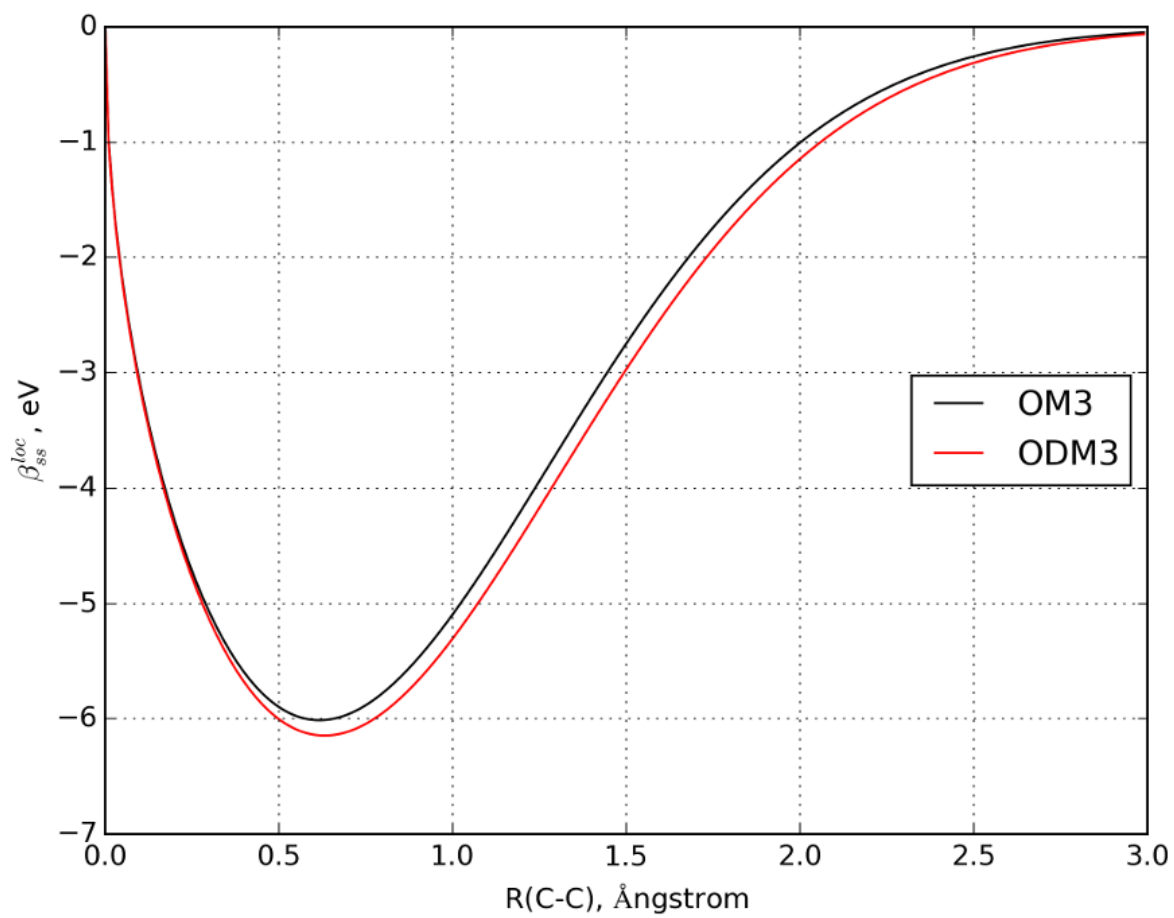

Figure S57: Comparison of  $ss$  local resonance integrals for the C–C pair calculated using standard OM3 and new ODM3 parameters.

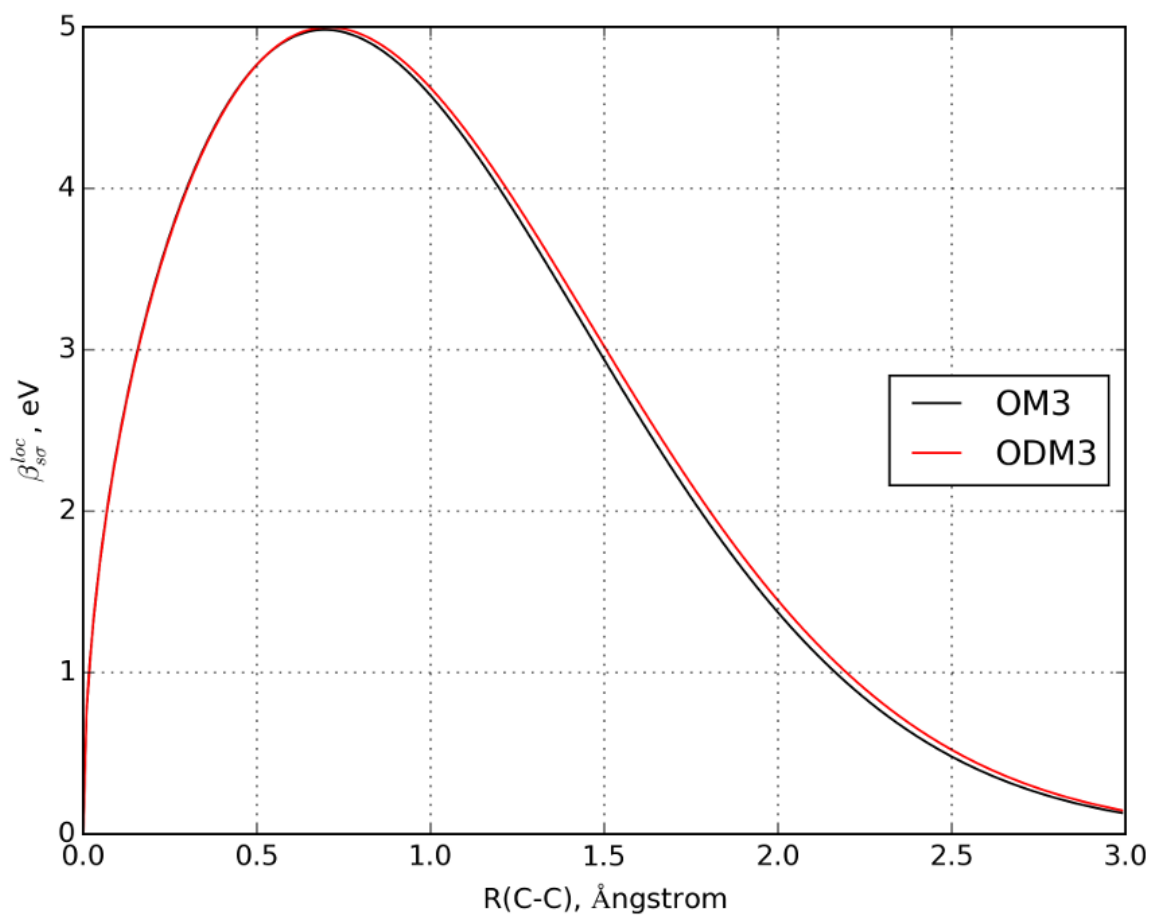

Figure S58: Comparison of  $s\sigma$  local resonance integrals for the C–C pair calculated using standard OM3 and new ODM3 parameters.

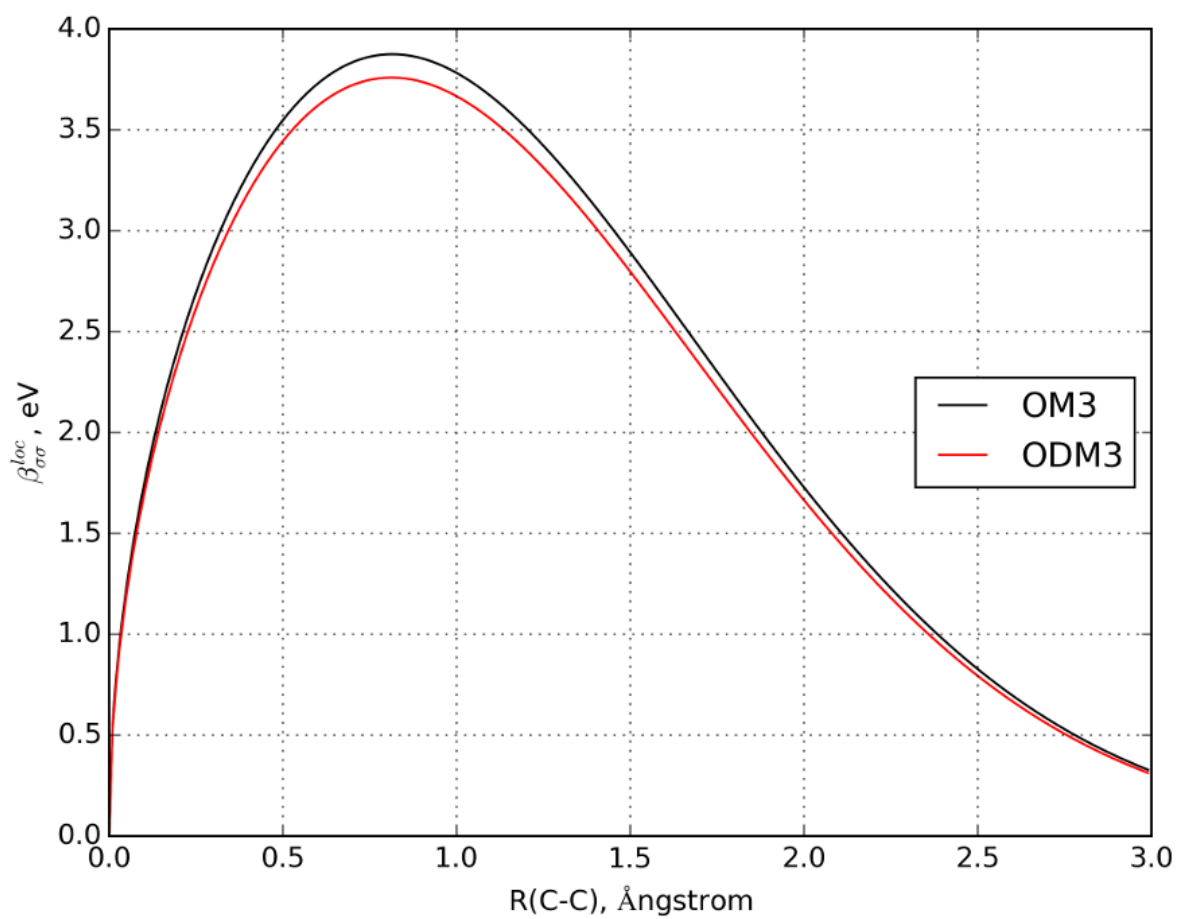

Figure S59: Comparison of  $\sigma\sigma$  local resonance integrals for the C–C pair calculated using standard OM3 and new ODM3 parameters.

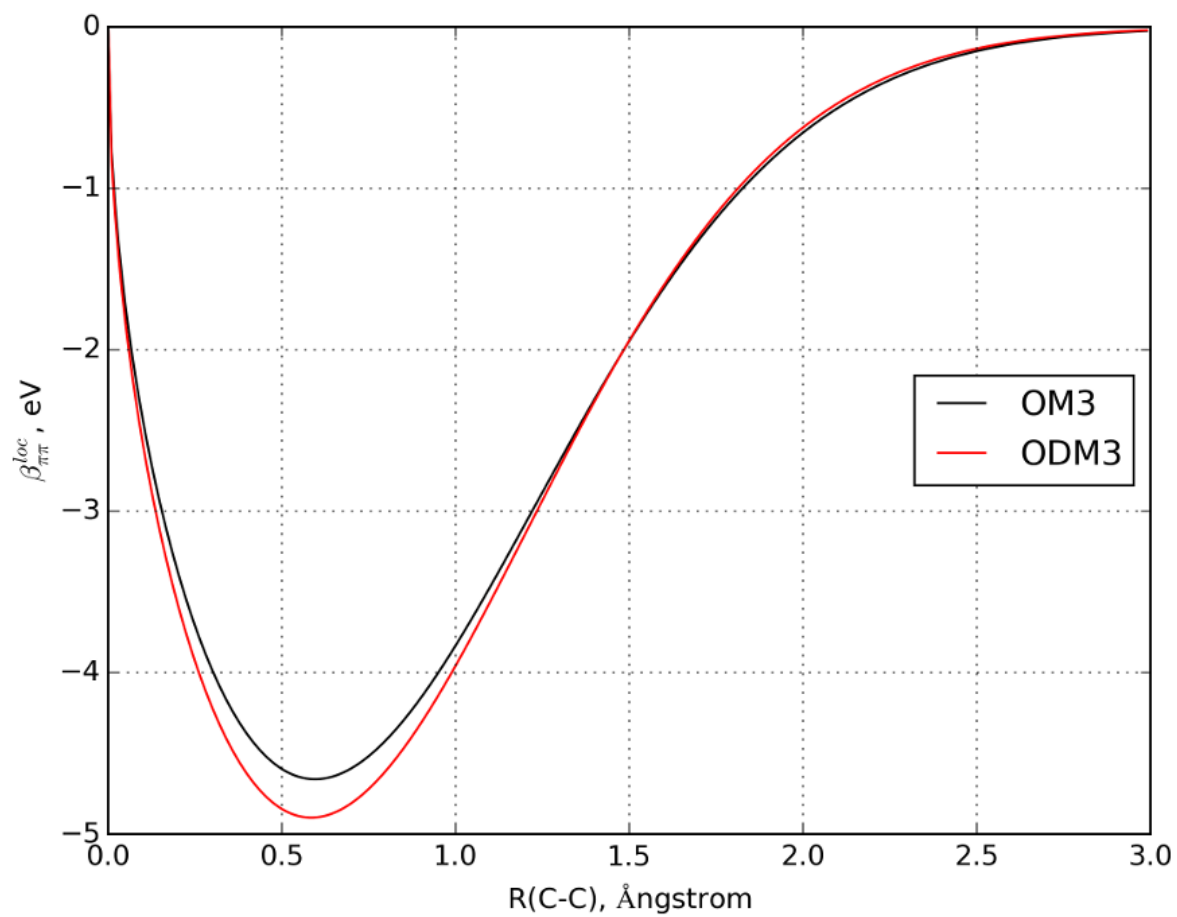

Figure S60: Comparison of  $\pi\pi$  local resonance integrals for the C–C pair calculated using standard OM3 and new ODM3 parameters.

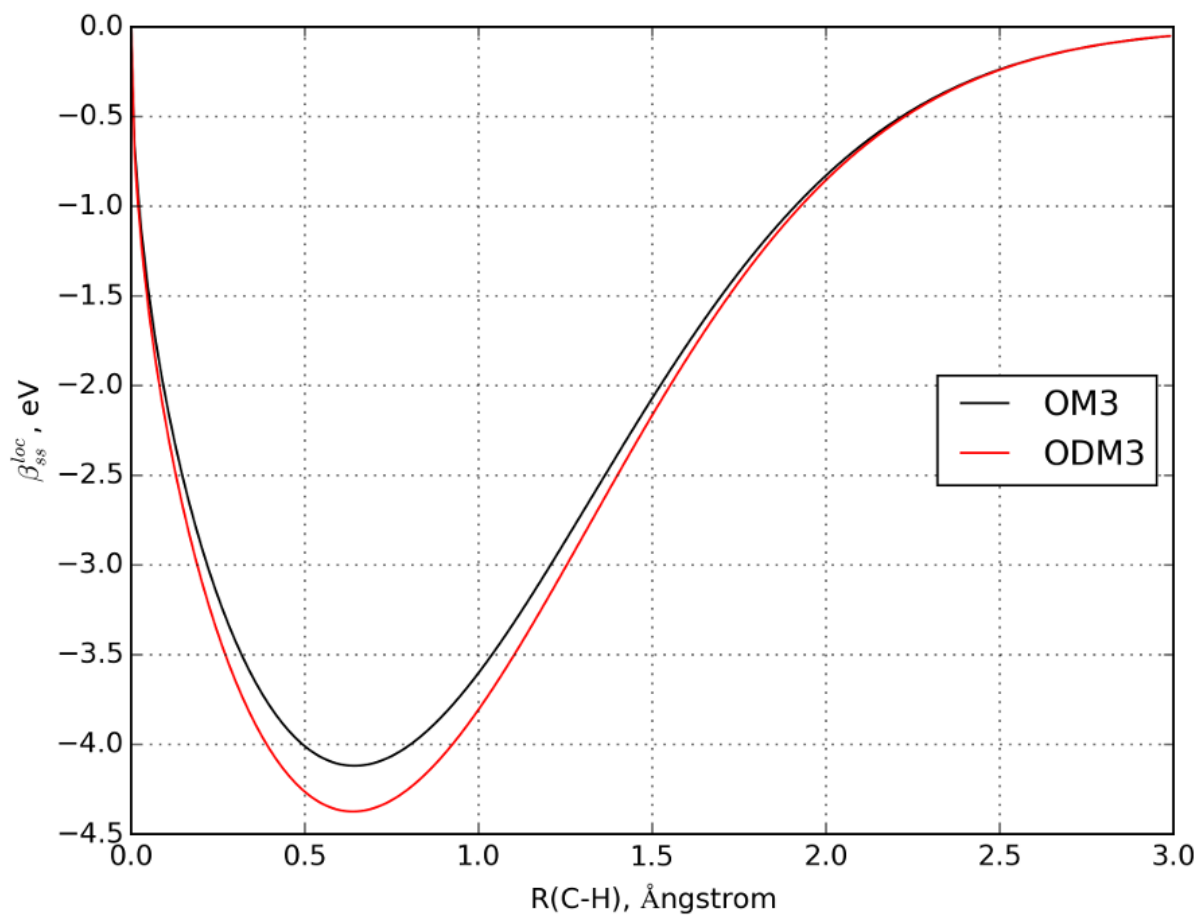

Figure S61: Comparison of  $ss$  local resonance integrals for the C–H pair calculated using standard OM3 and new ODM3 parameters.

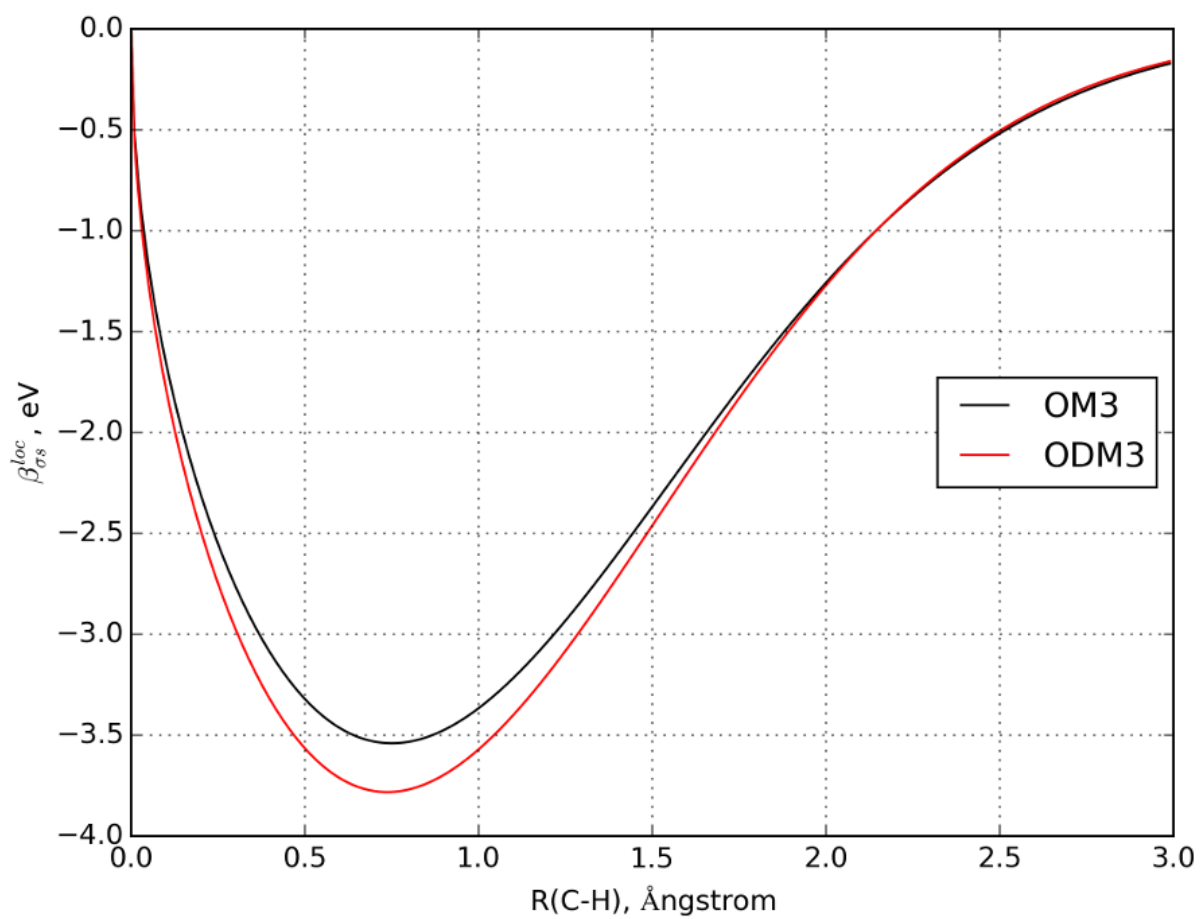

Figure S62: Comparison of  $\sigma_s$  local resonance integrals for the C–H pair calculated using standard OM3 and new ODM3 parameters.

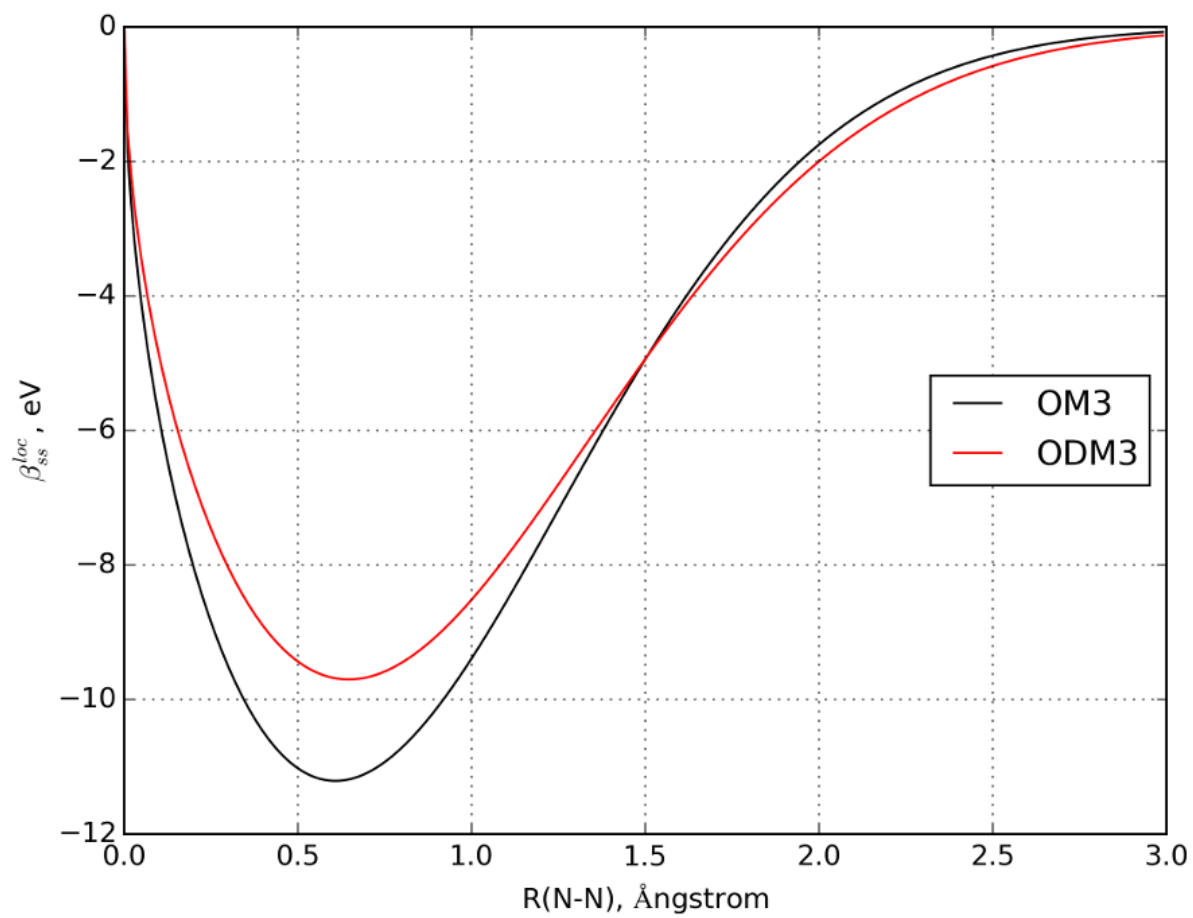

Figure S63: Comparison of  $ss$  local resonance integrals for the N–N pair calculated using standard OM3 and new ODM3 parameters.

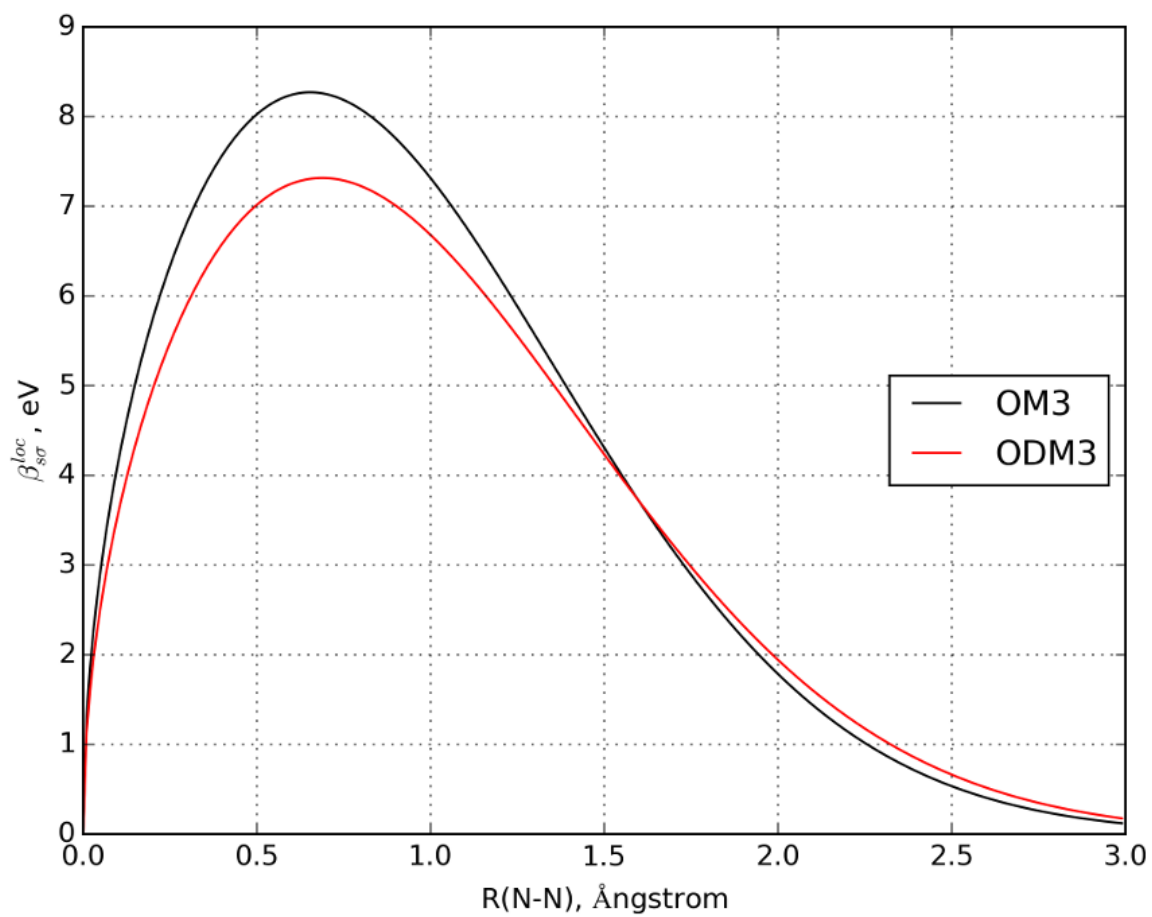

Figure S64: Comparison of  $\sigma$  local resonance integrals for the N–N pair calculated using standard OM3 and new ODM3 parameters.



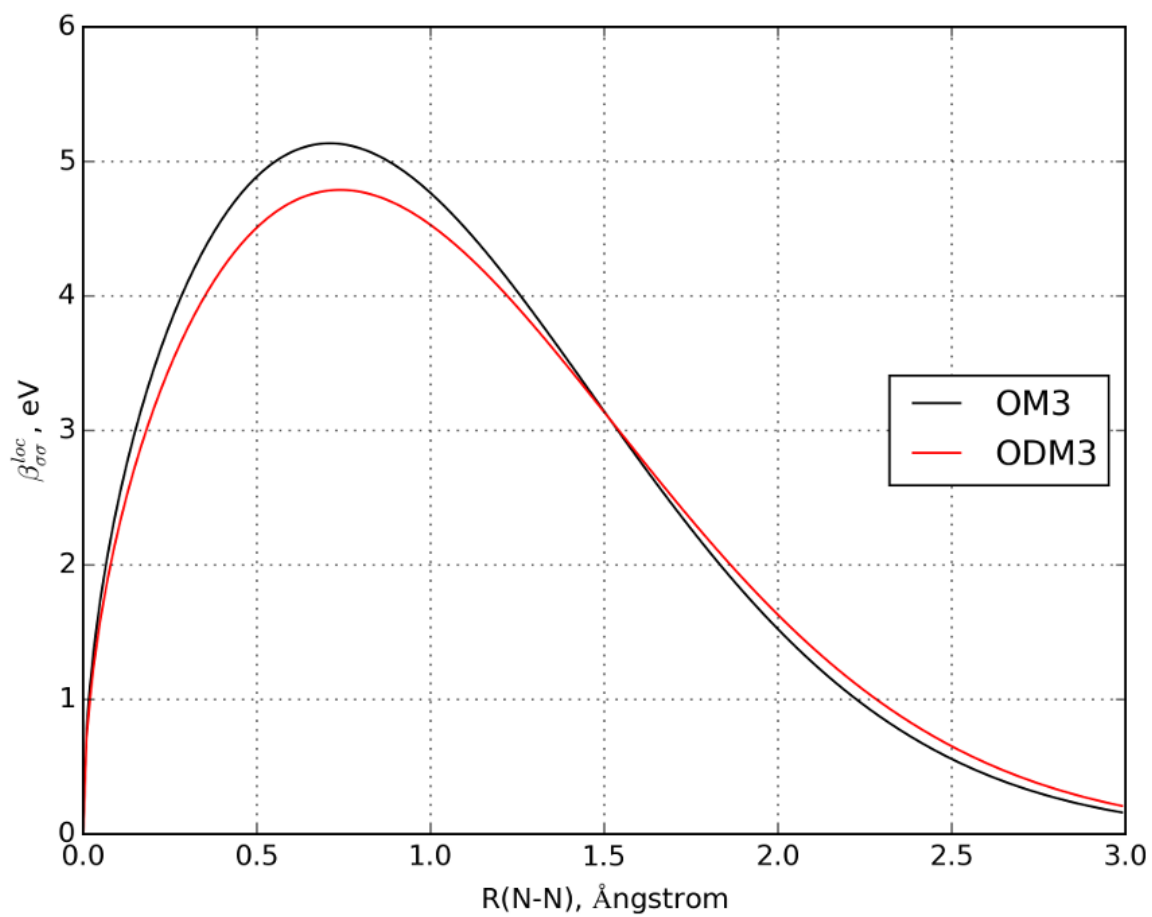

Figure S65: Comparison of  $\sigma\sigma$  local resonance integrals for the N–N pair calculated using standard OM3 and new ODM3 parameters.

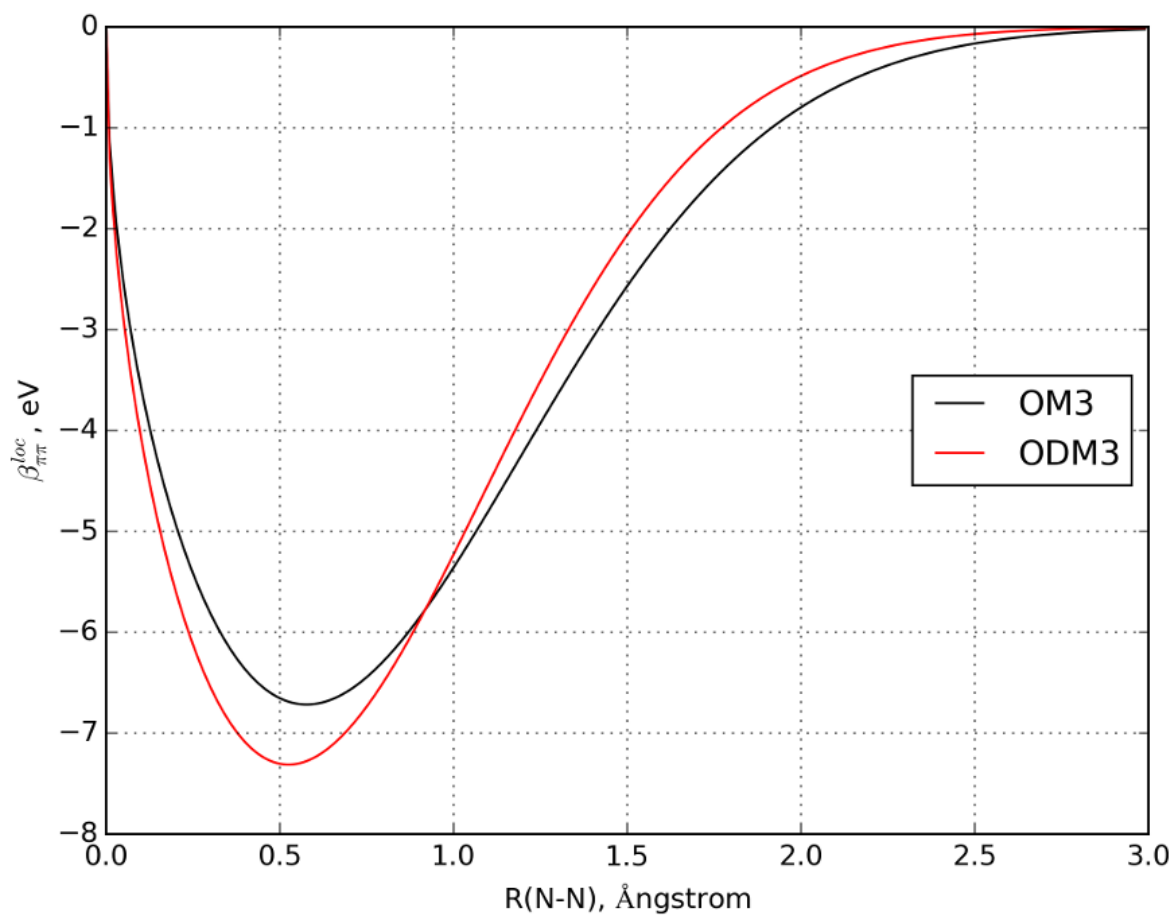

Figure S66: Comparison of  $\pi\pi$  local resonance integrals for the N–N pair calculated using standard OM3 and new ODM3 parameters.

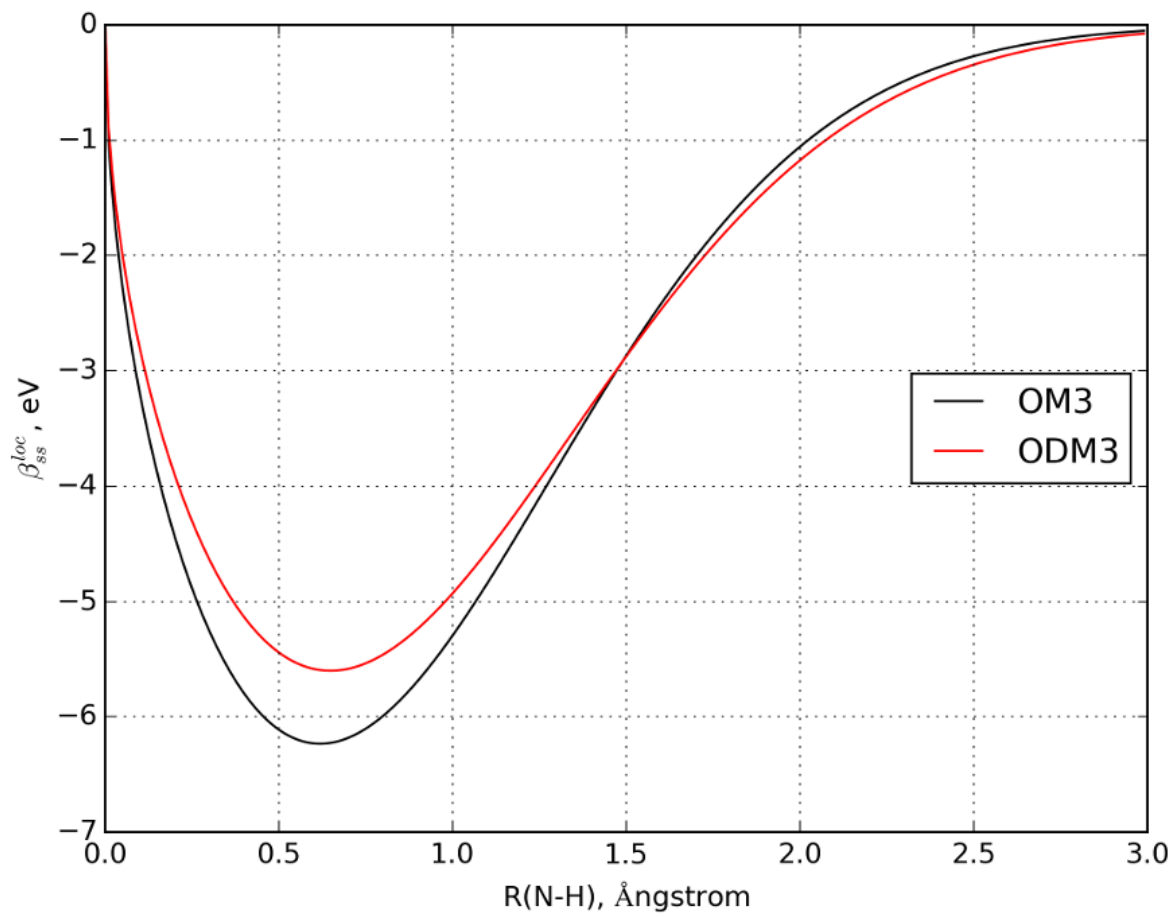

Figure S67: Comparison of  $ss$  local resonance integrals for the N–H pair calculated using standard OM3 and new ODM3 parameters.

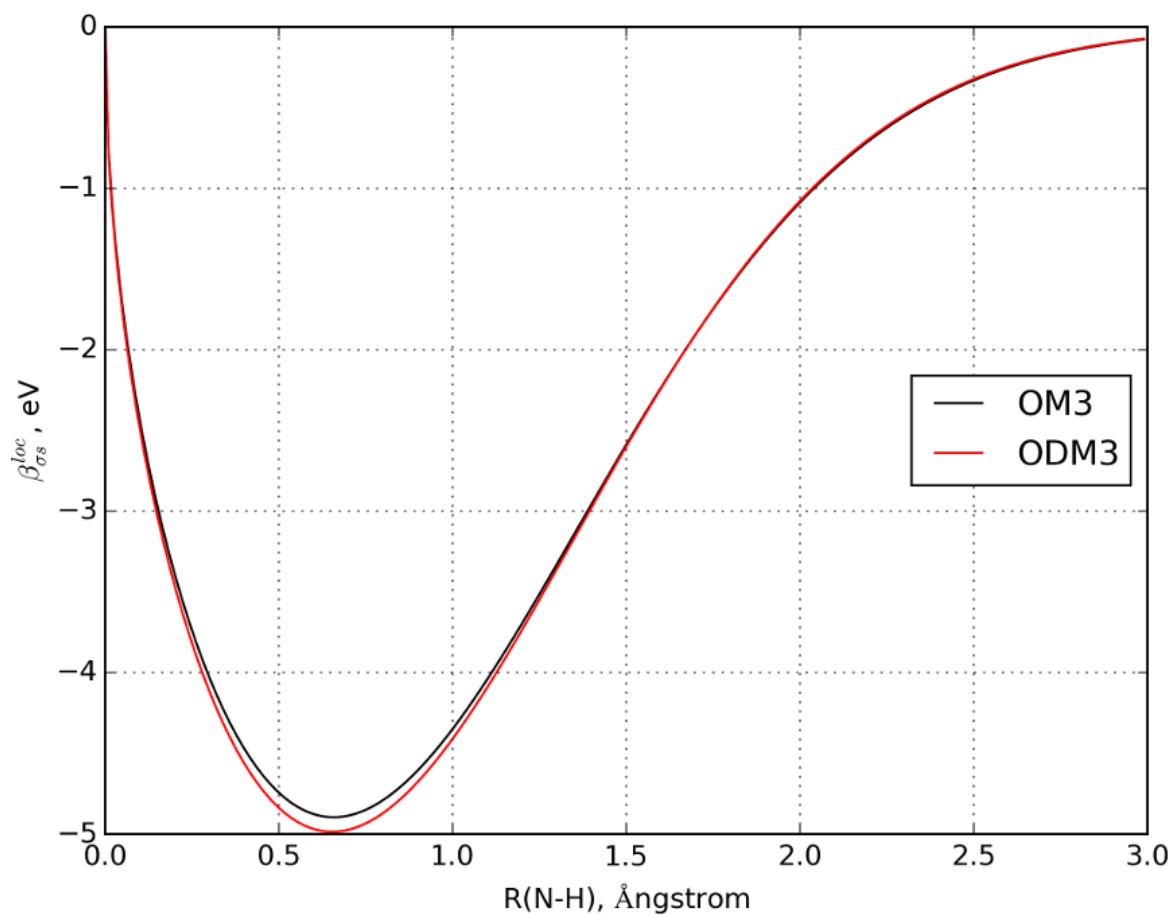

Figure S68: Comparison of  $\sigma s$  local resonance integrals for the N–H pair calculated using standard OM3 and new ODM3 parameters.

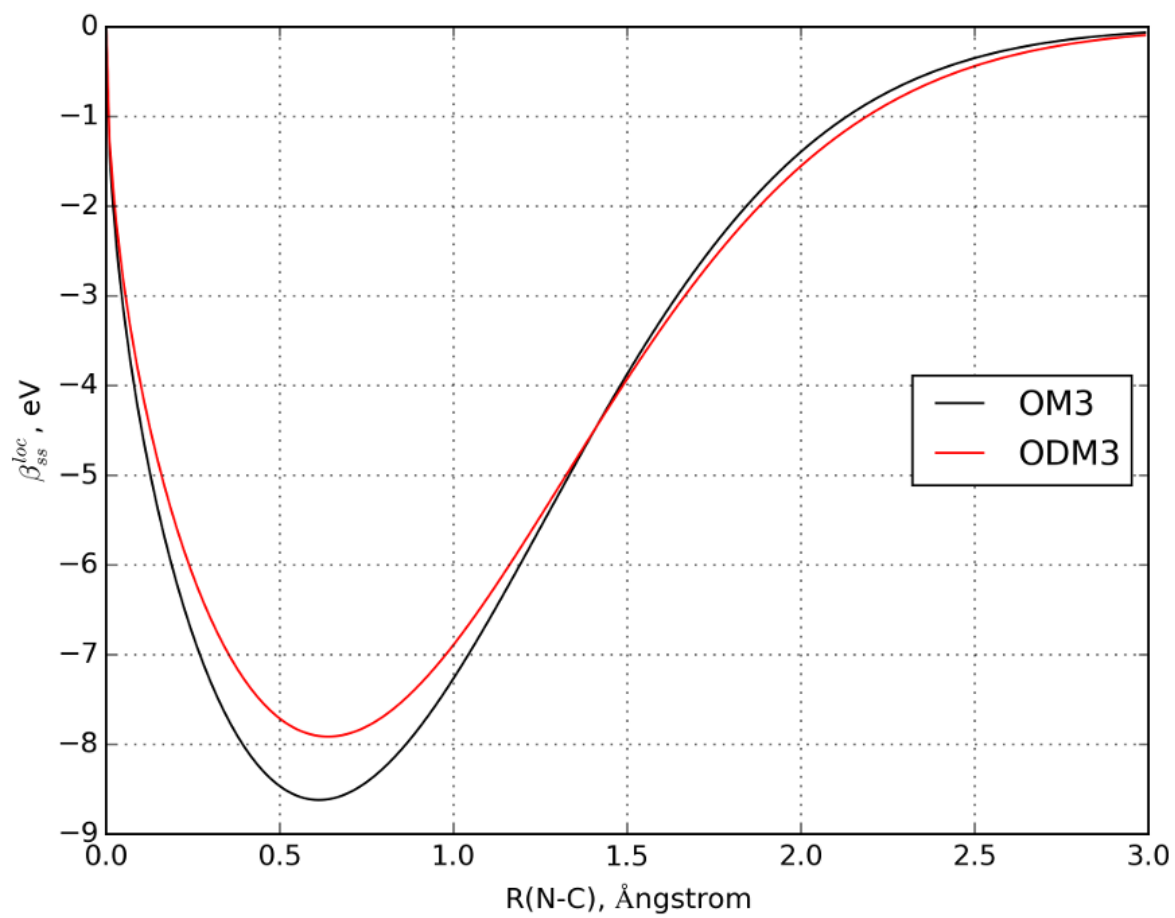

Figure S69: Comparison of  $ss$  local resonance integrals for the N–C pair calculated using standard OM3 and new ODM3 parameters.

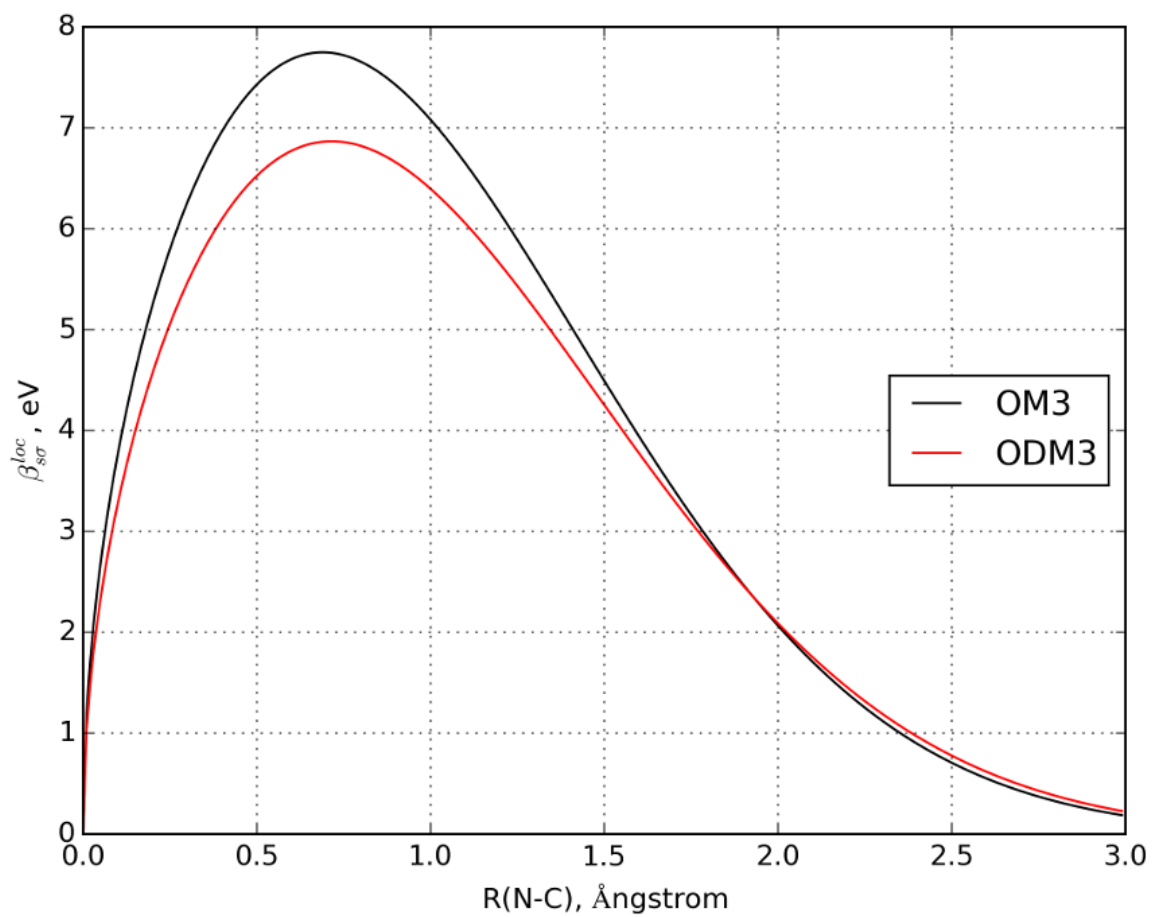

Figure S70: Comparison of  $s\sigma$  local resonance integrals for the N–C pair calculated using standard OM3 and new ODM3 parameters.

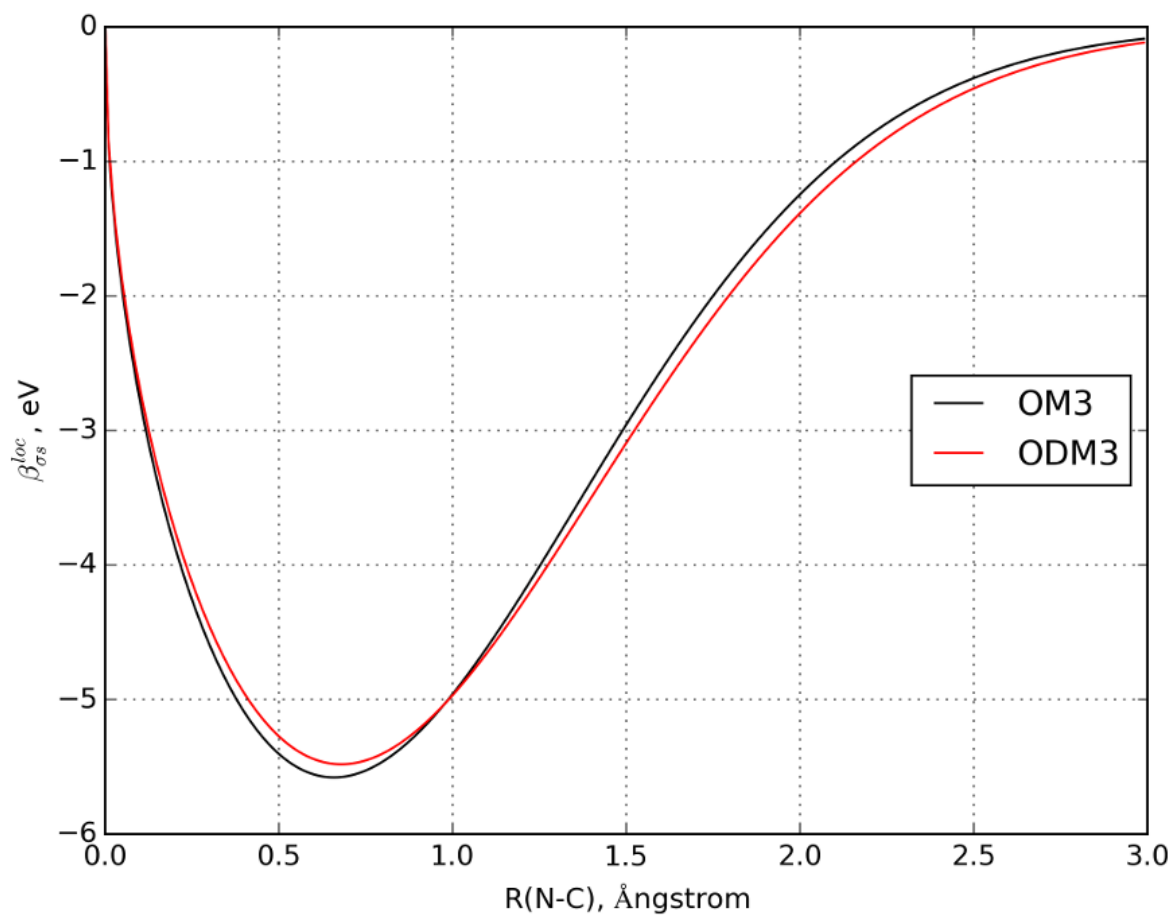

Figure S71: Comparison of  $\sigma s$  local resonance integrals for the N–C pair calculated using standard OM3 and new ODM3 parameters.

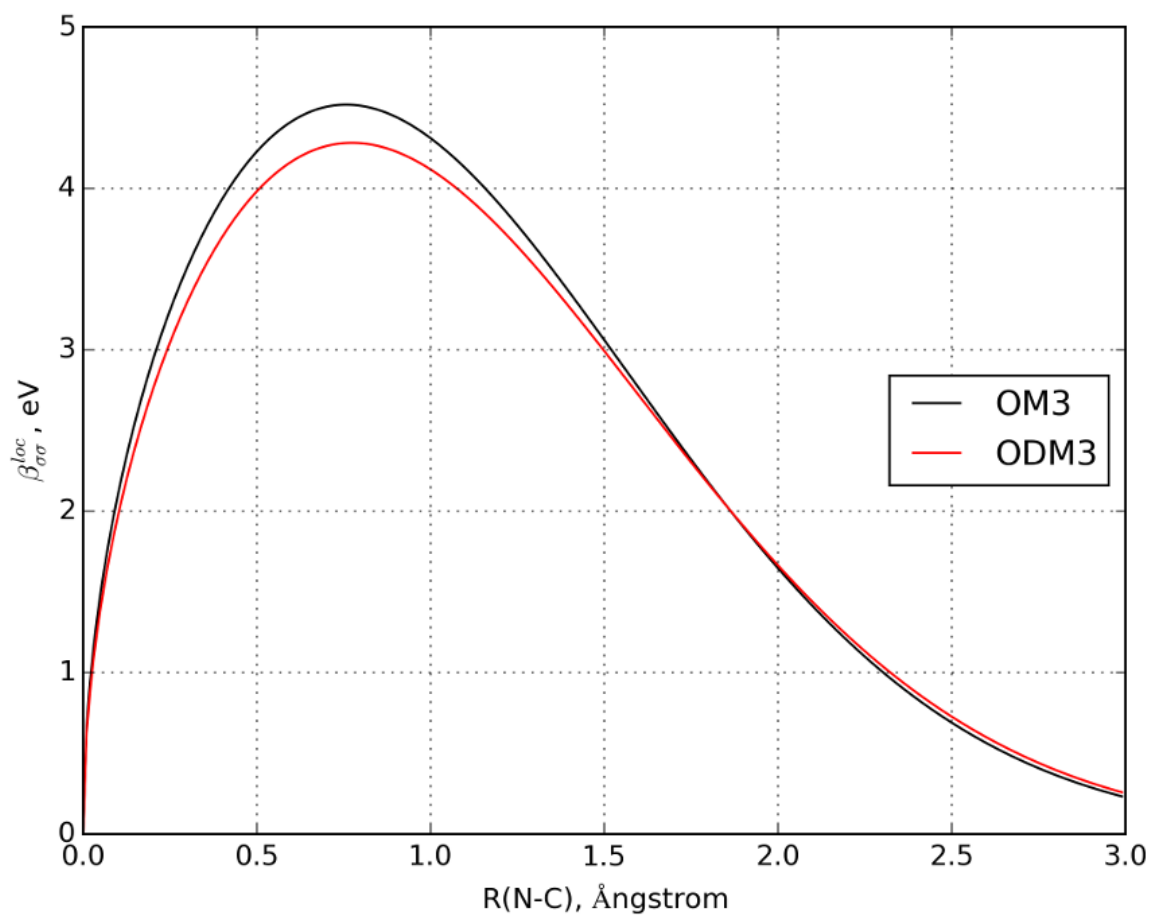

Figure S72: Comparison of  $\sigma\sigma$  local resonance integrals for the N–C pair calculated using standard OM3 and new ODM3 parameters.



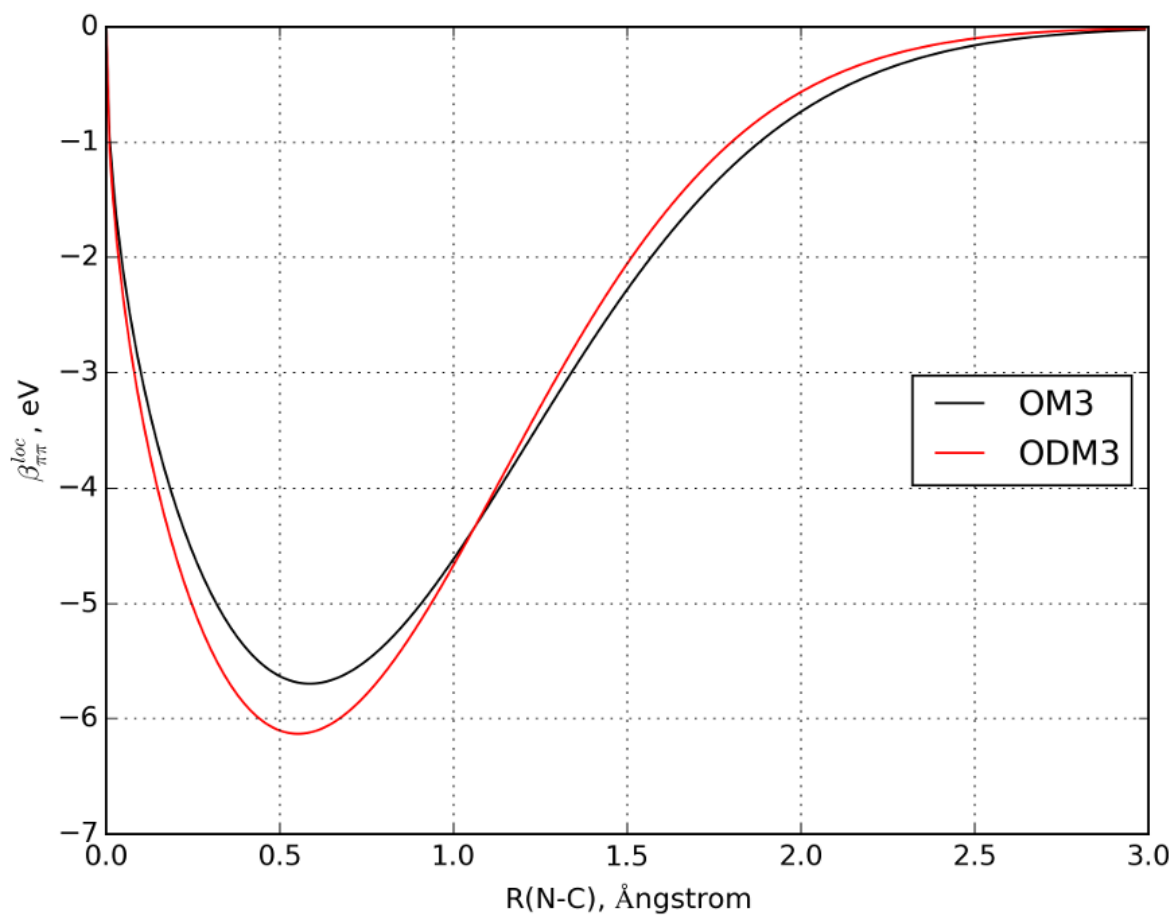

Figure S73: Comparison of  $\pi\pi$  local resonance integrals for the N–C pair calculated using standard OM3 and new ODM3 parameters.

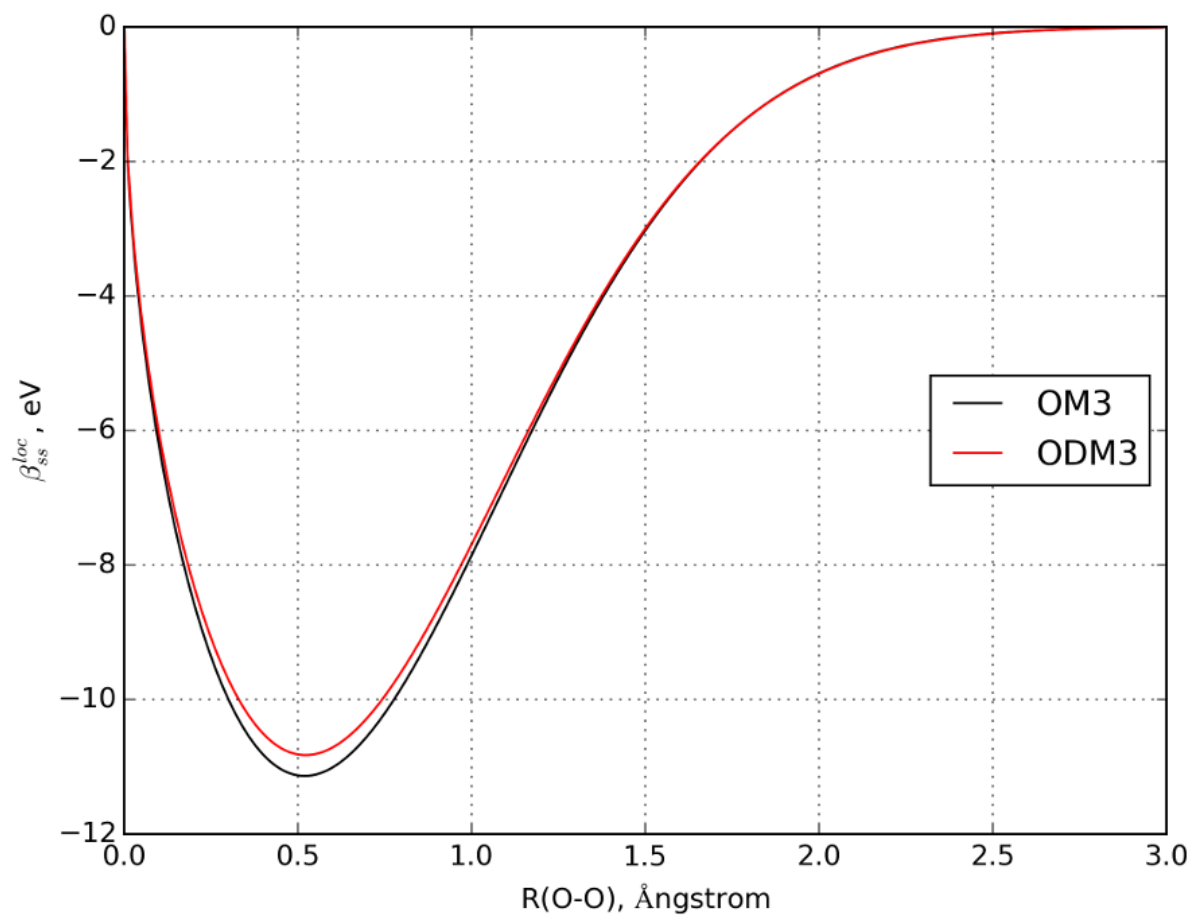

Figure S74: Comparison of  $ss$  local resonance integrals for the O–O pair calculated using standard OM3 and new ODM3 parameters.

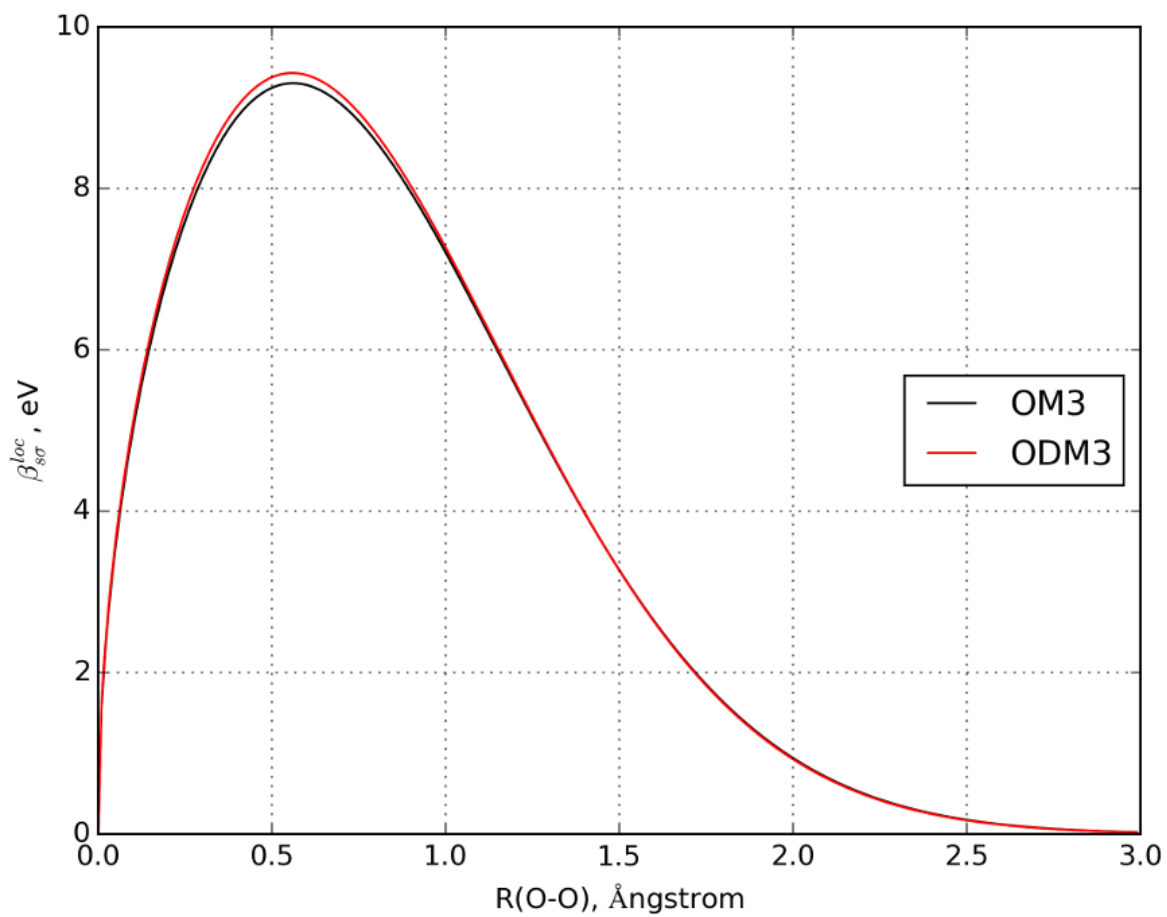

Figure S75: Comparison of  $s\sigma$  local resonance integrals for the O–O pair calculated using standard OM3 and new ODM3 parameters.

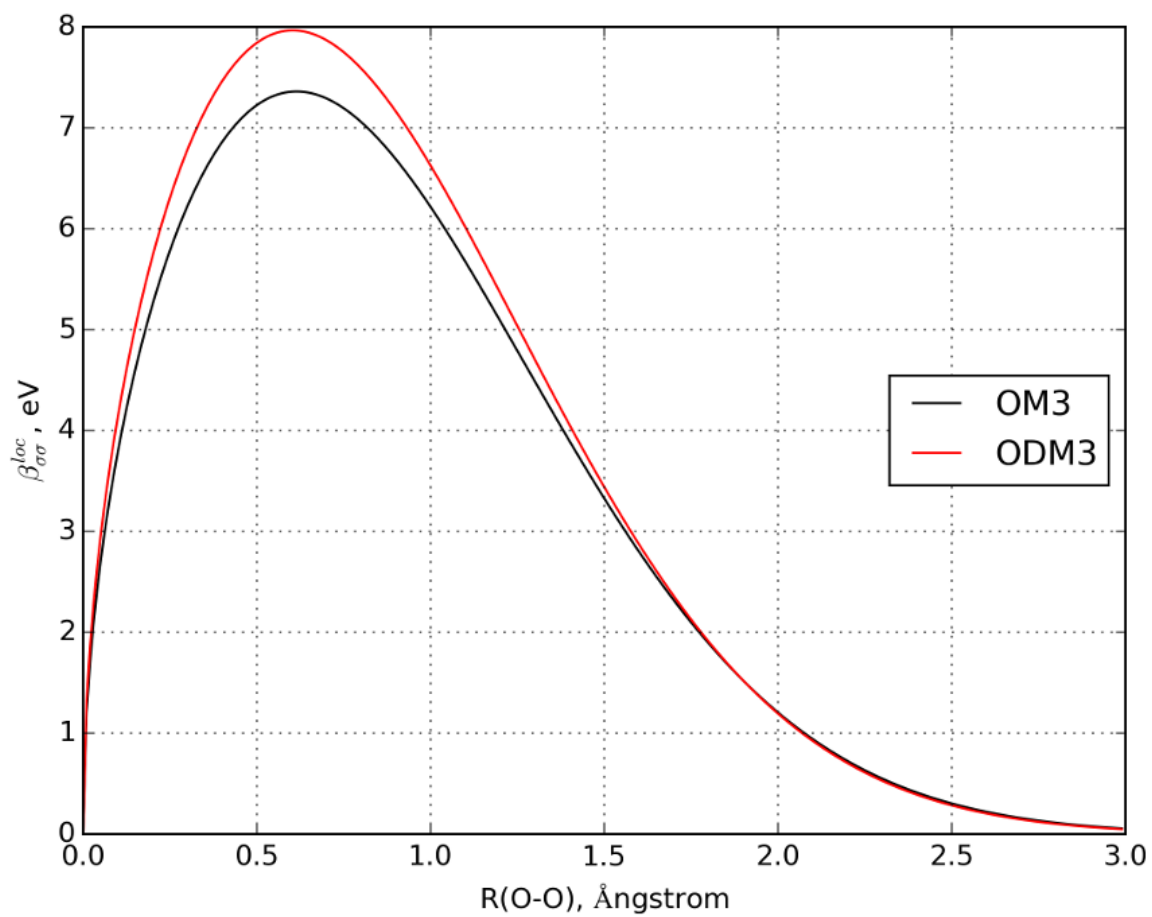

Figure S76: Comparison of  $\sigma\sigma$  local resonance integrals for the O–O pair calculated using standard OM3 and new ODM3 parameters.

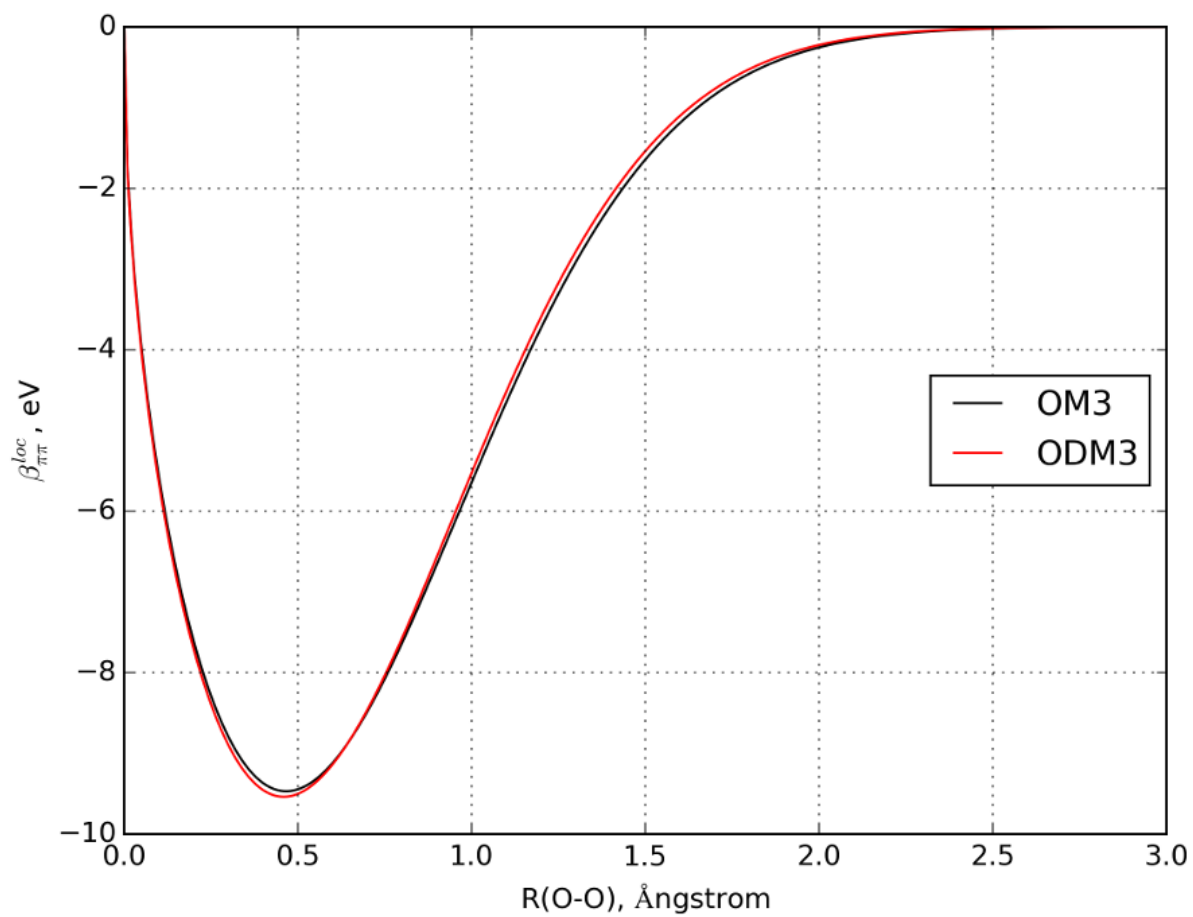

Figure S77: Comparison of  $\pi\pi$  local resonance integrals for the O–O pair calculated using standard OM3 and new ODM3 parameters.

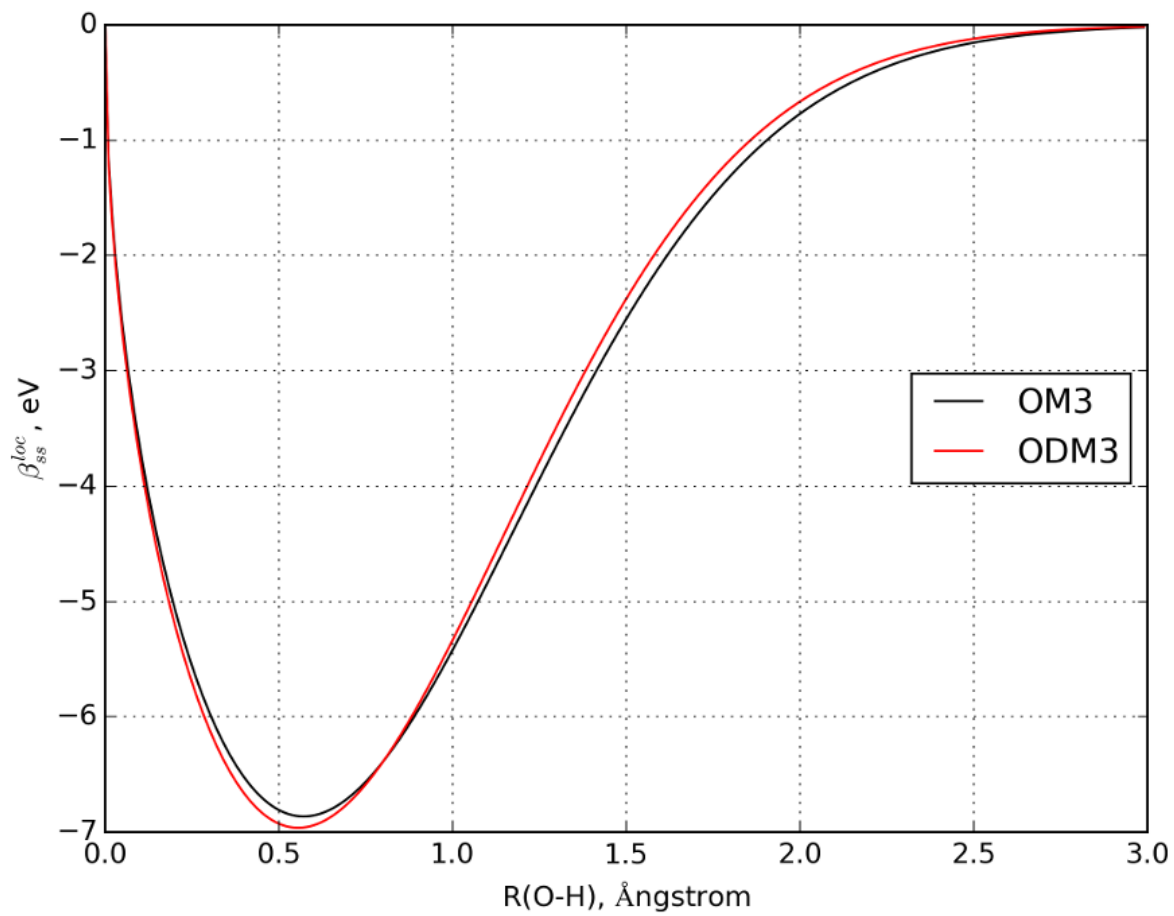

Figure S78: Comparison of  $ss$  local resonance integrals for the O–H pair calculated using standard OM3 and new ODM3 parameters.

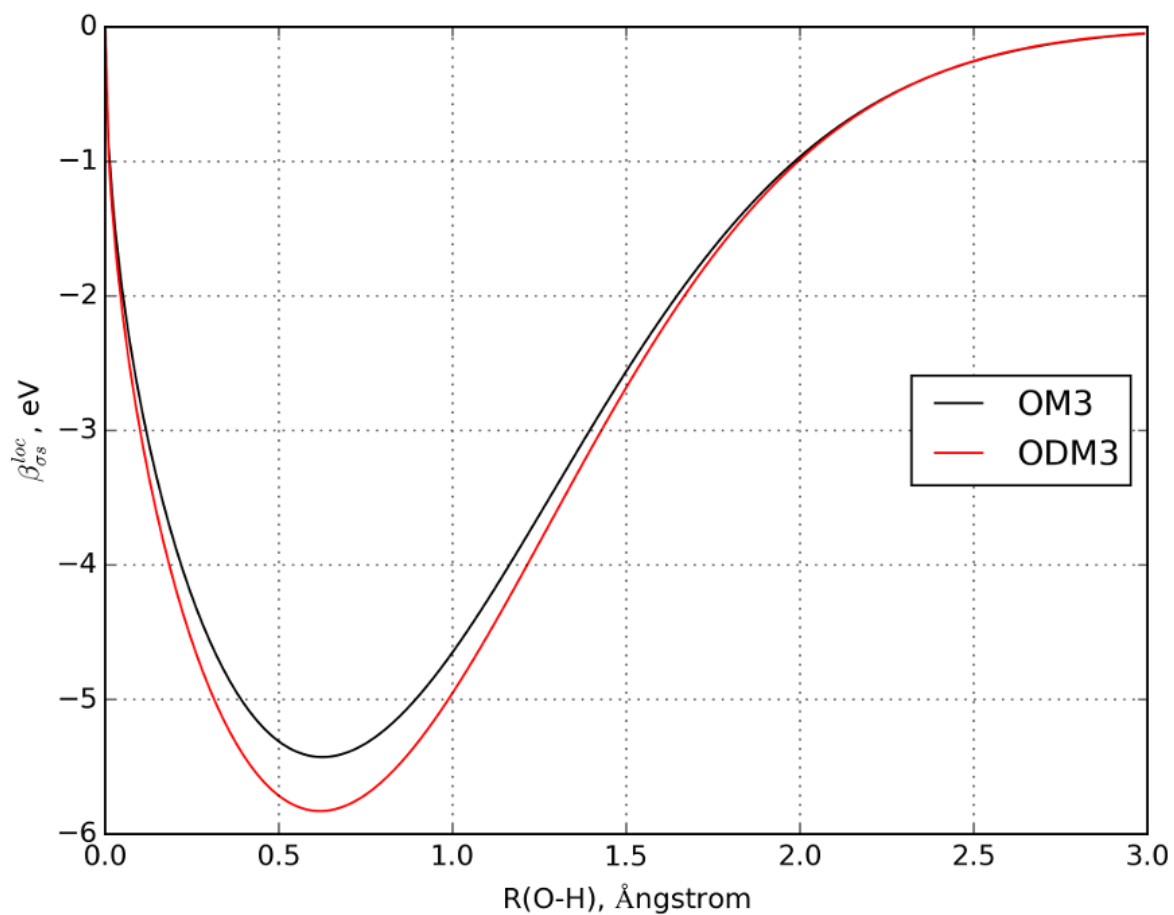

Figure S79: Comparison of  $\sigma s$  local resonance integrals for the O–H pair calculated using standard OM3 and new ODM3 parameters.

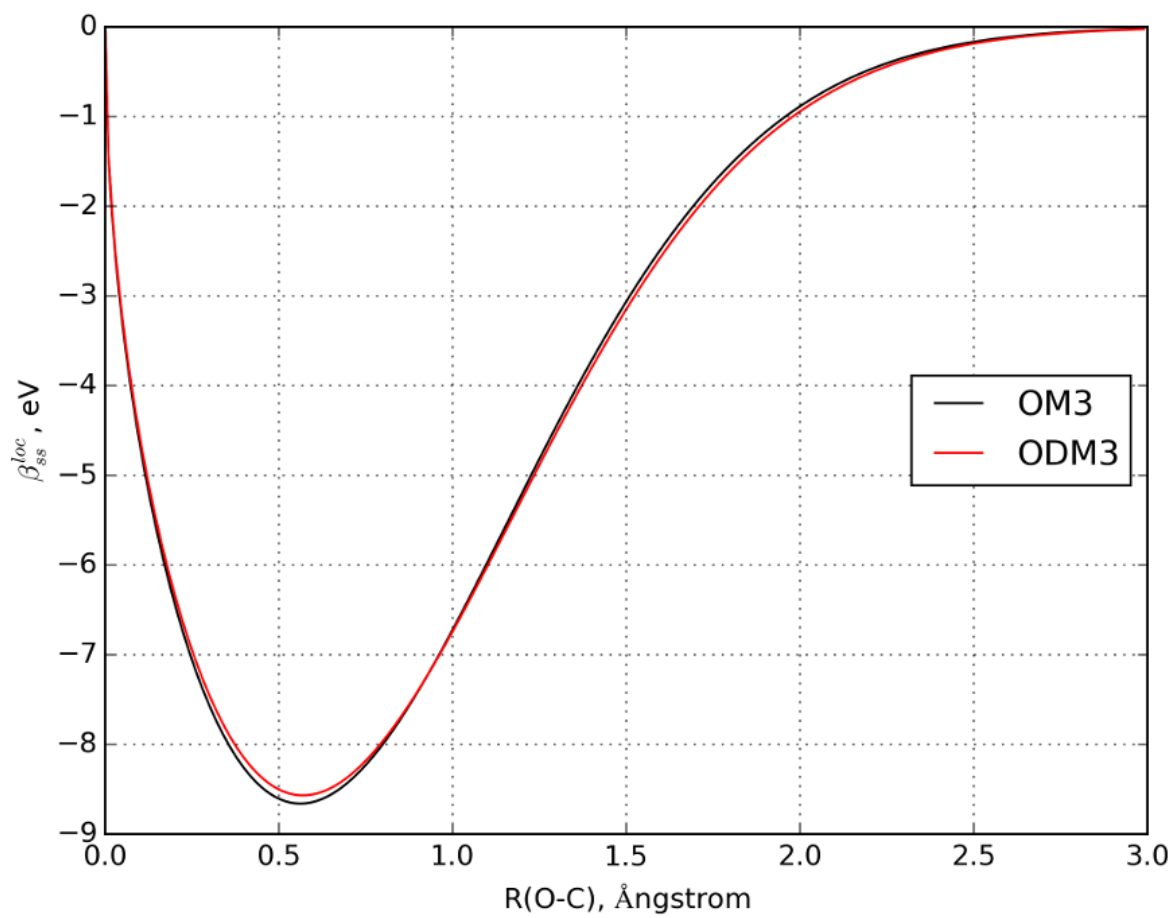

Figure S80: Comparison of  $ss$  local resonance integrals for the O–C pair calculated using standard OM3 and new ODM3 parameters.



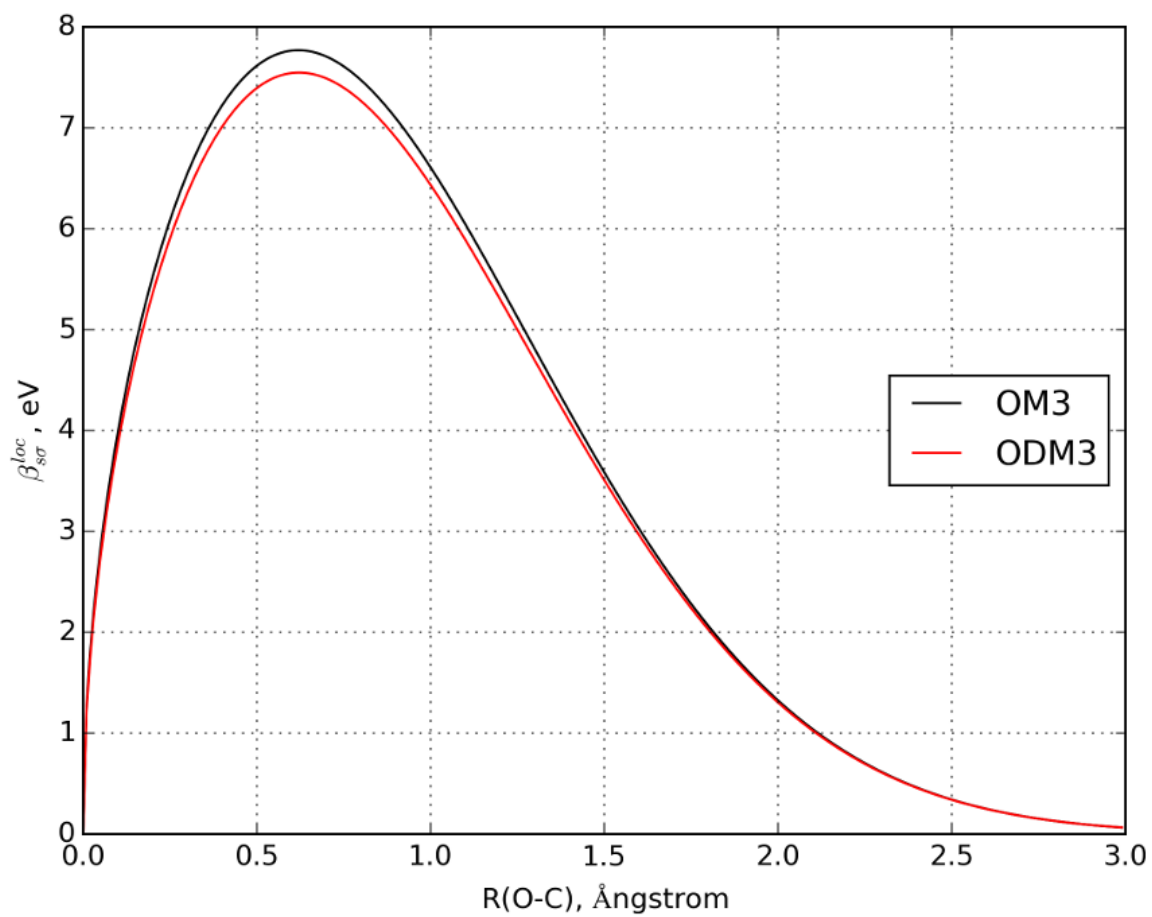

Figure S81: Comparison of  $s\sigma$  local resonance integrals for the O–C pair calculated using standard OM3 and new ODM3 parameters.

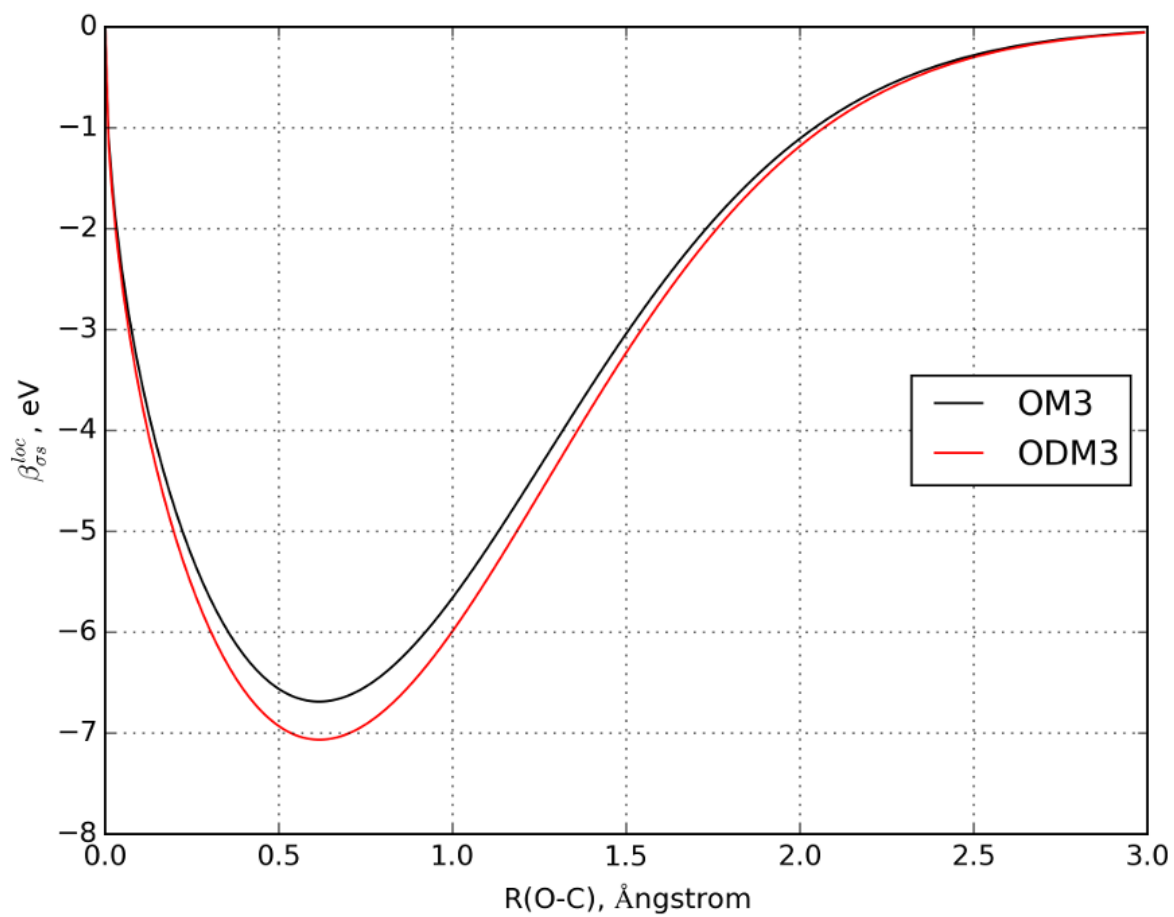

Figure S82: Comparison of  $\sigma s$  local resonance integrals for the O–C pair calculated using standard OM3 and new ODM3 parameters.

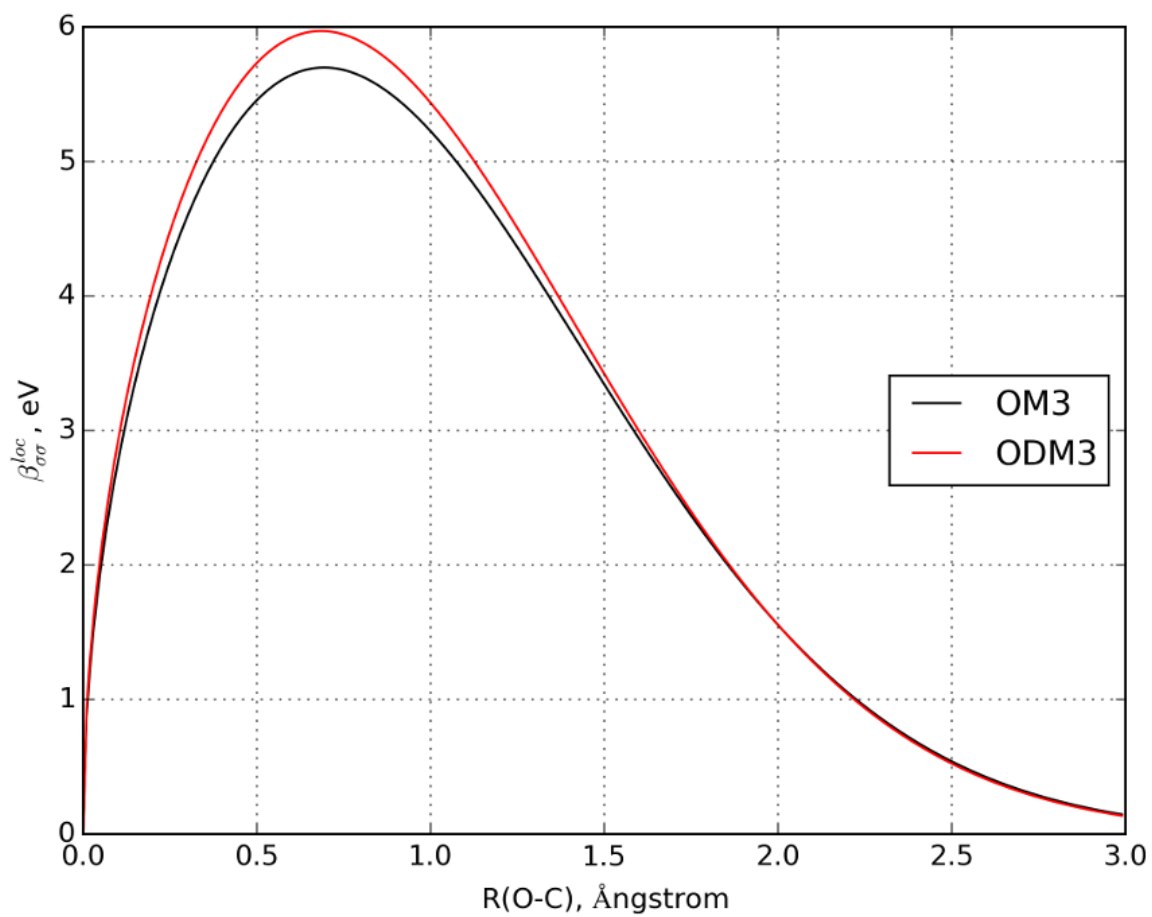

Figure S83: Comparison of  $\sigma\sigma$  local resonance integrals for the O–C pair calculated using standard OM3 and new ODM3 parameters.

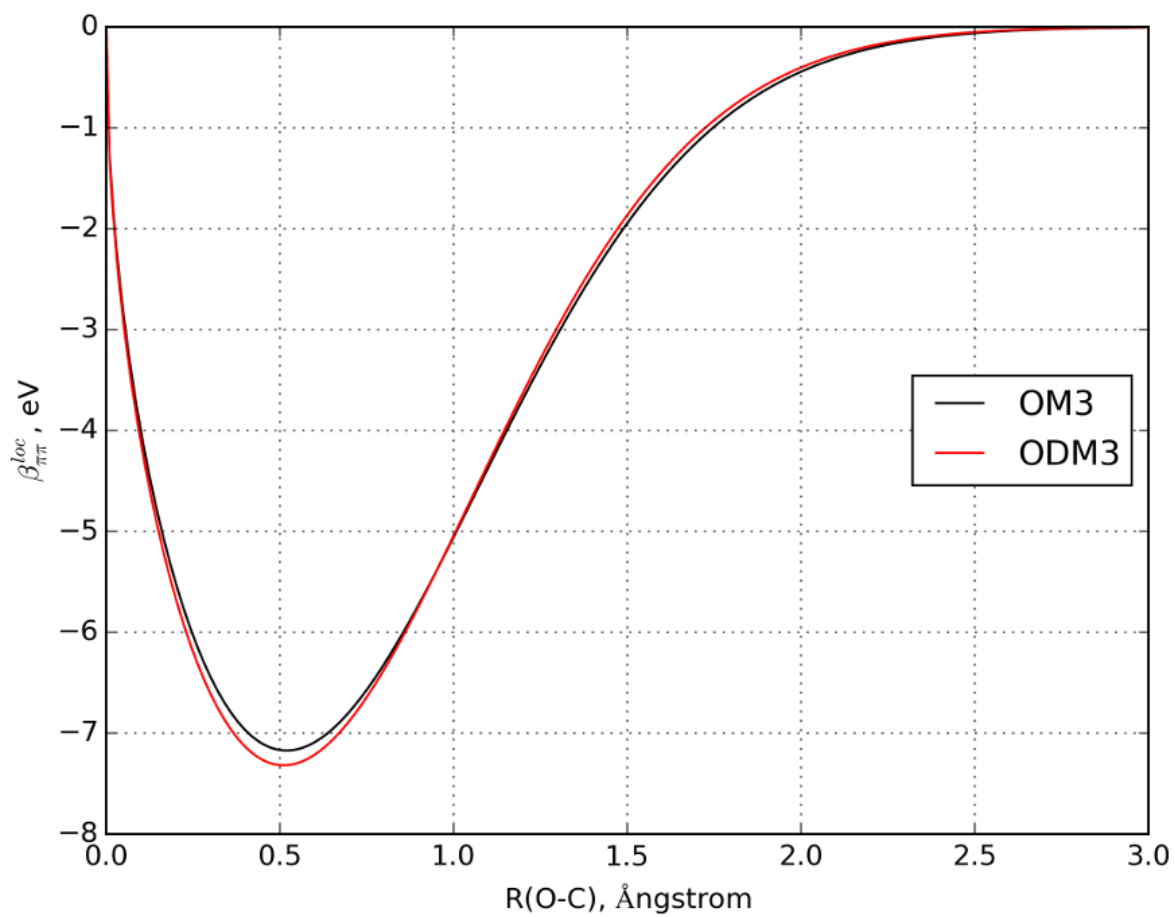

Figure S84: Comparison of  $\pi\pi$  local resonance integrals for the O–C pair calculated using standard OM3 and new ODM3 parameters.

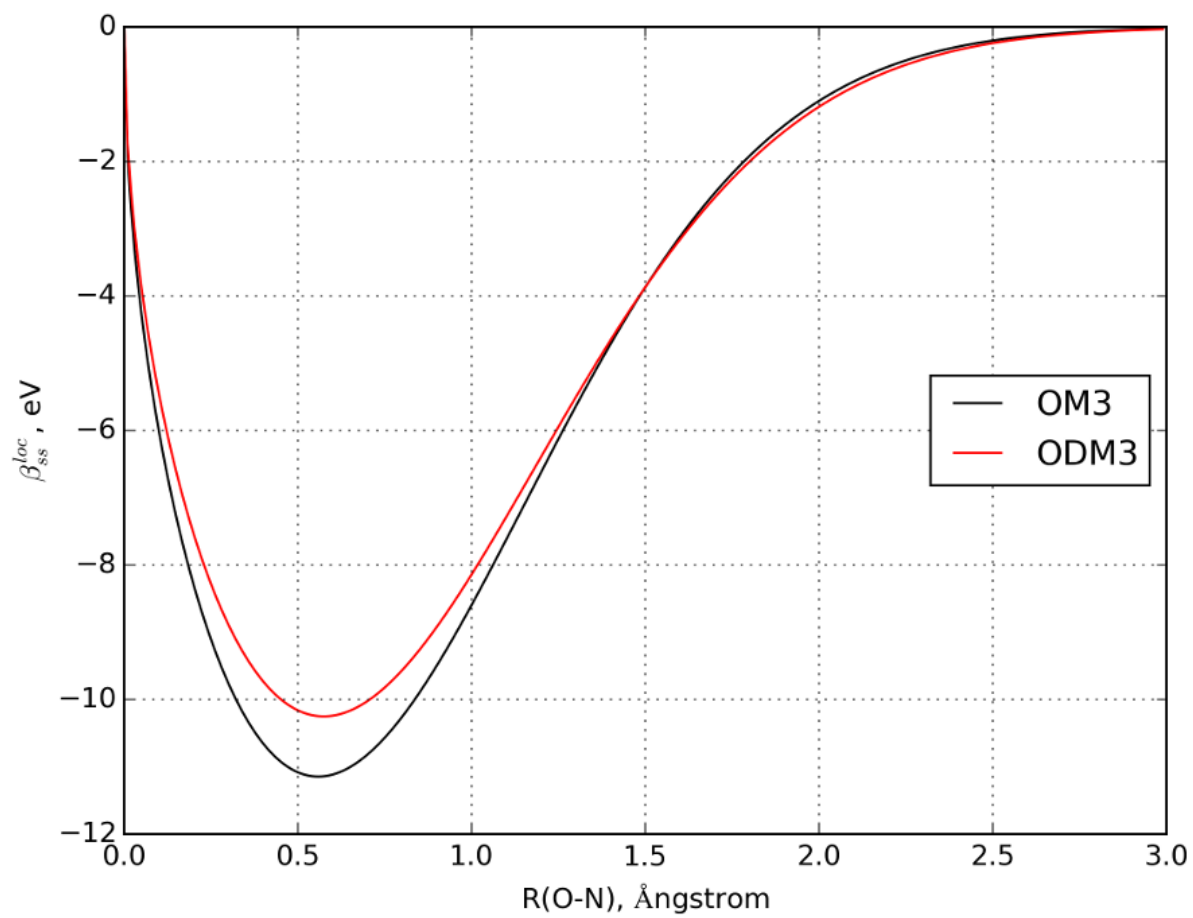

Figure S85: Comparison of  $ss$  local resonance integrals for the O–N pair calculated using standard OM3 and new ODM3 parameters.

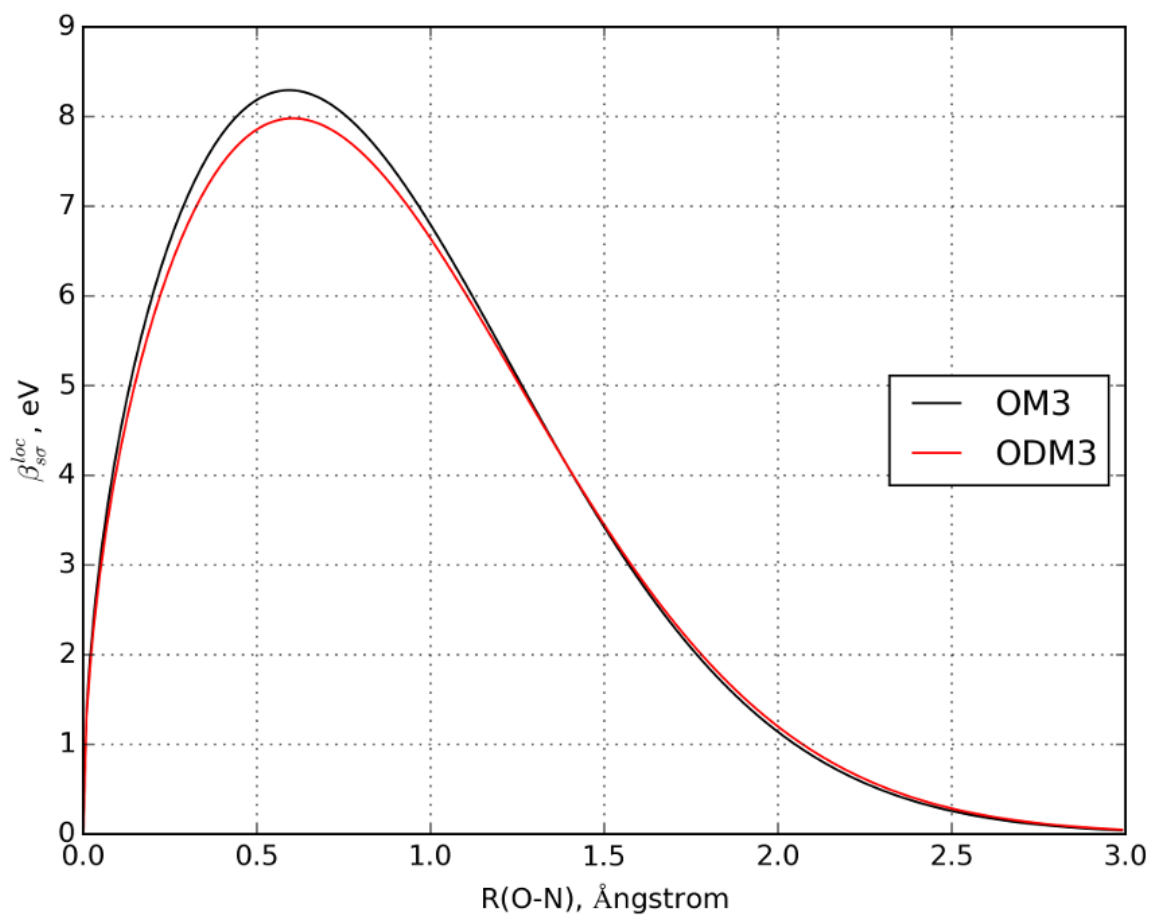

Figure S86: Comparison of  $s\sigma$  local resonance integrals for the O–N pair calculated using standard OM3 and new ODM3 parameters.

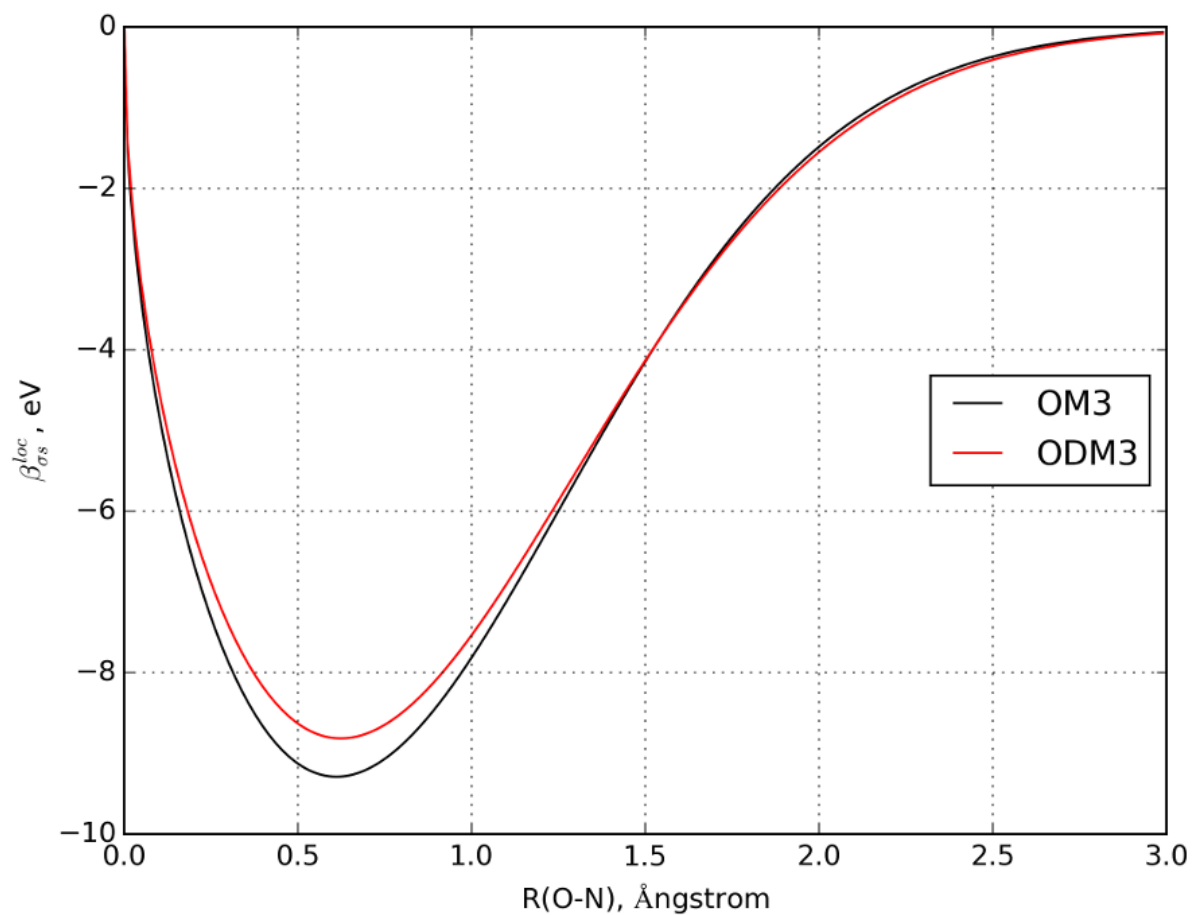

Figure S87: Comparison of  $\sigma s$  local resonance integrals for the O–N pair calculated using standard OM3 and new ODM3 parameters.

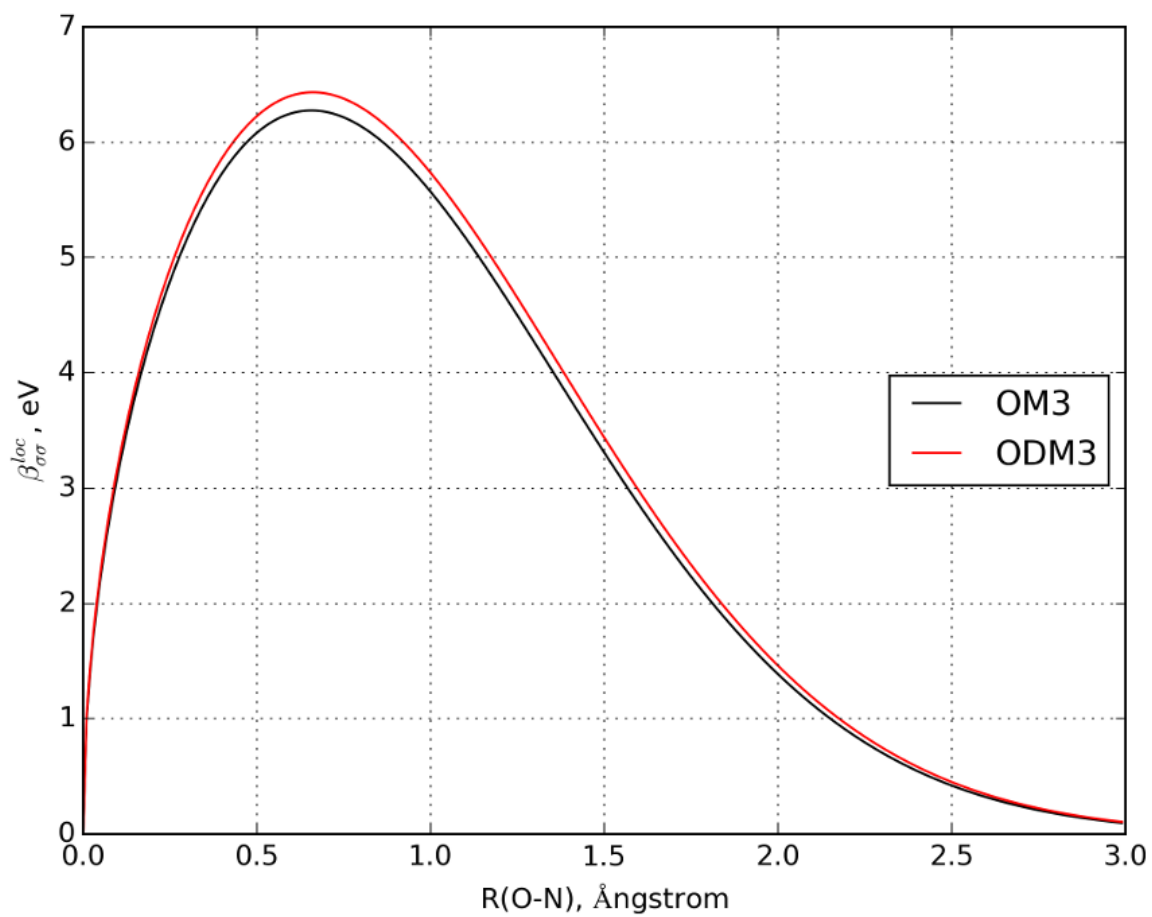

Figure S88: Comparison of  $\sigma\sigma$  local resonance integrals for the O–N pair calculated using standard OM3 and new ODM3 parameters.



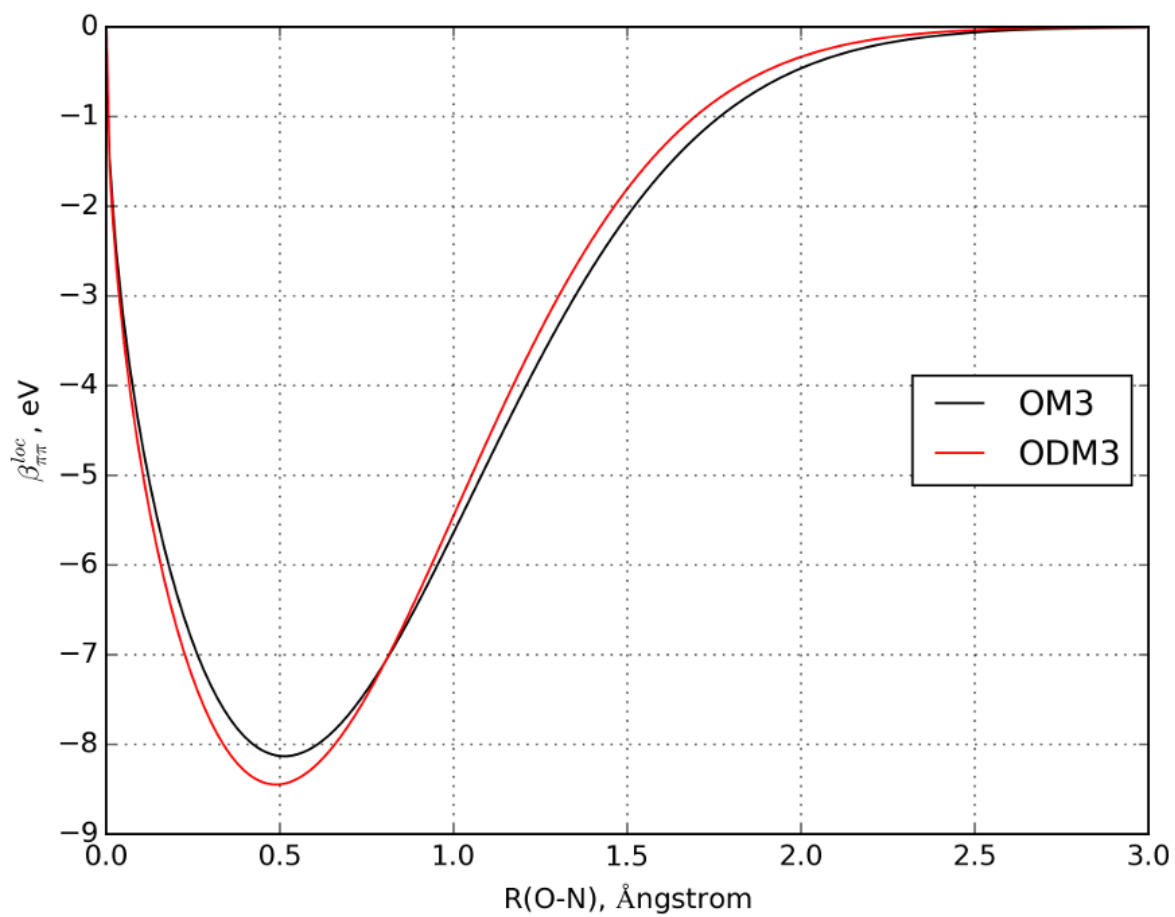

Figure S89: Comparison of  $\pi\pi$  local resonance integrals for the O–N pair calculated using standard OM3 and new ODM3 parameters.

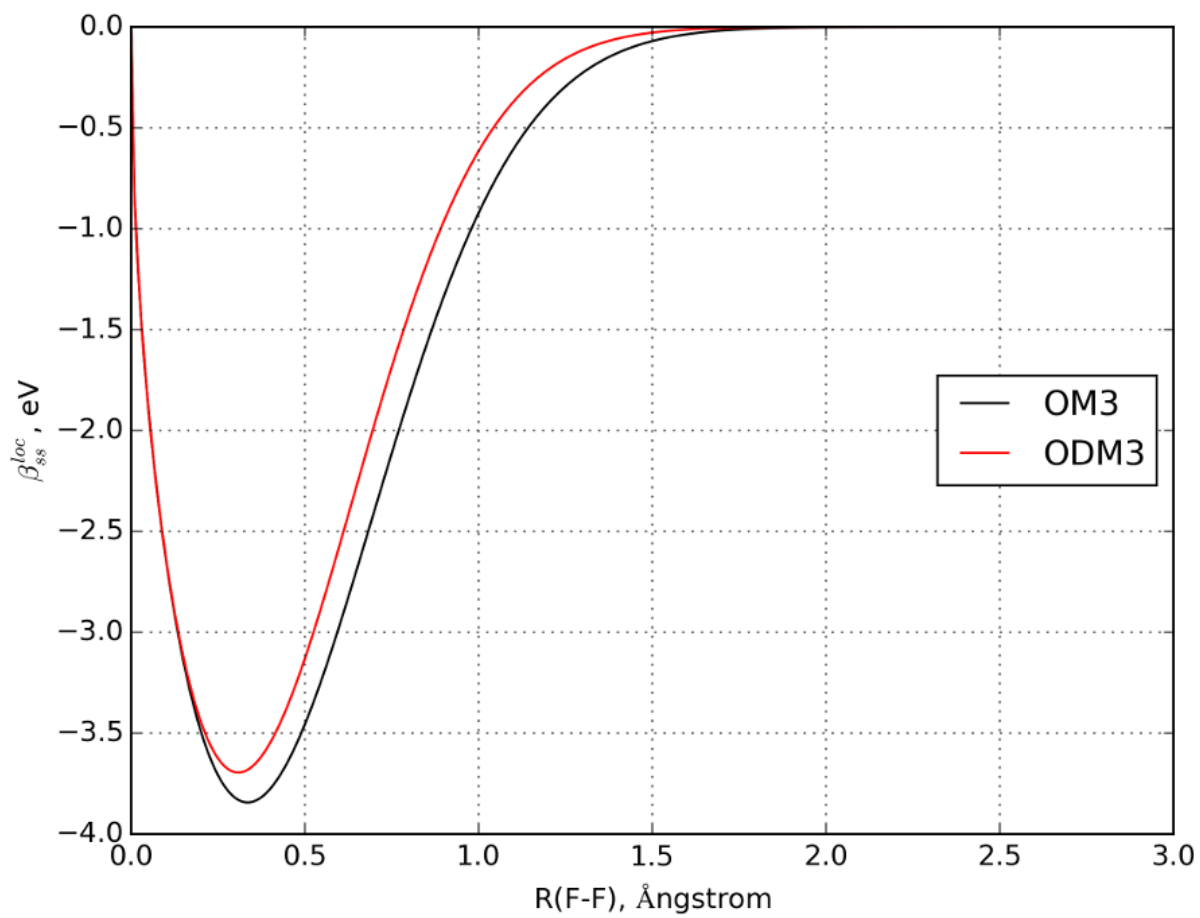

Figure S90: Comparison of  $ss$  local resonance integrals for the F–F pair calculated using standard OM3 and new ODM3 parameters.

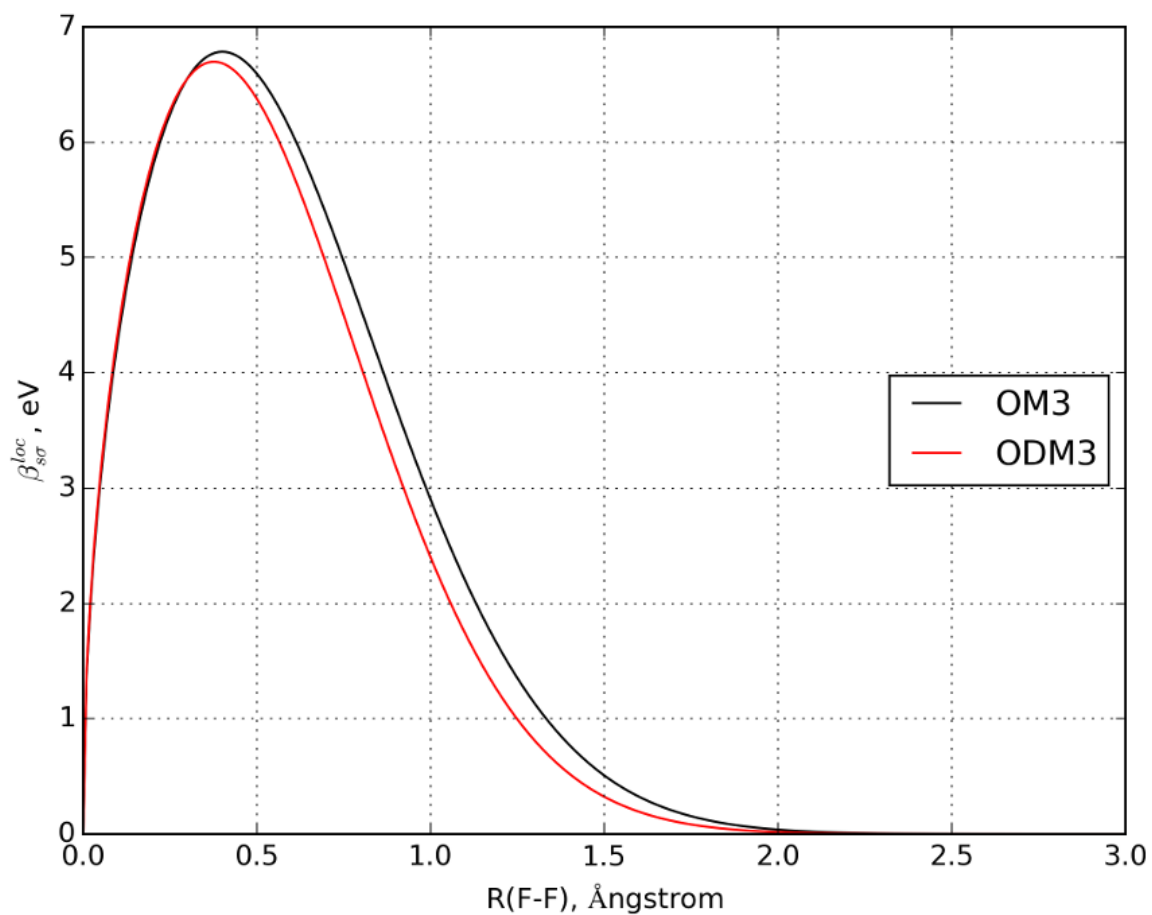

Figure S91: Comparison of  $s\sigma$  local resonance integrals for the F–F pair calculated using standard OM3 and new ODM3 parameters.

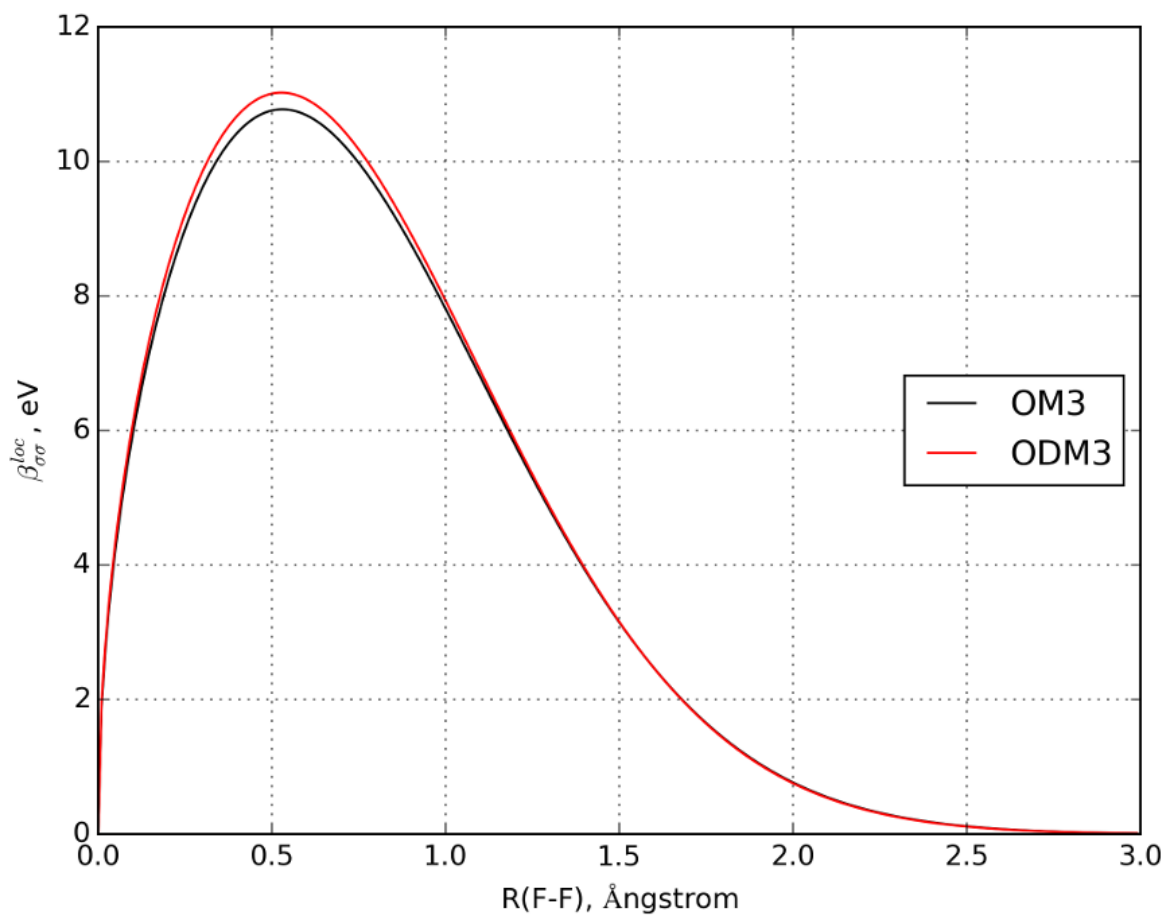

Figure S92: Comparison of  $\sigma\sigma$  local resonance integrals for the F–F pair calculated using standard OM3 and new ODM3 parameters.

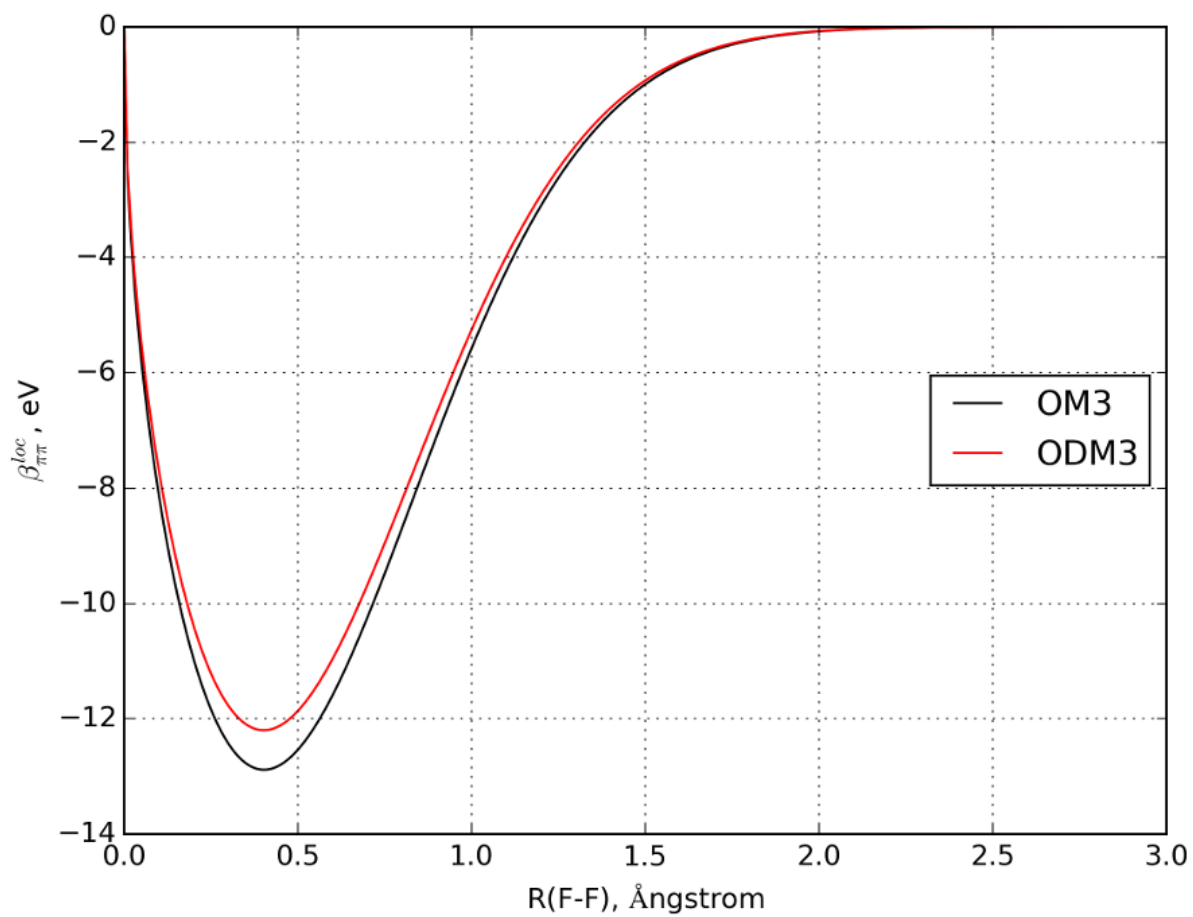

Figure S93: Comparison of  $\pi\pi$  local resonance integrals for the F–F pair calculated using standard OM3 and new ODM3 parameters.

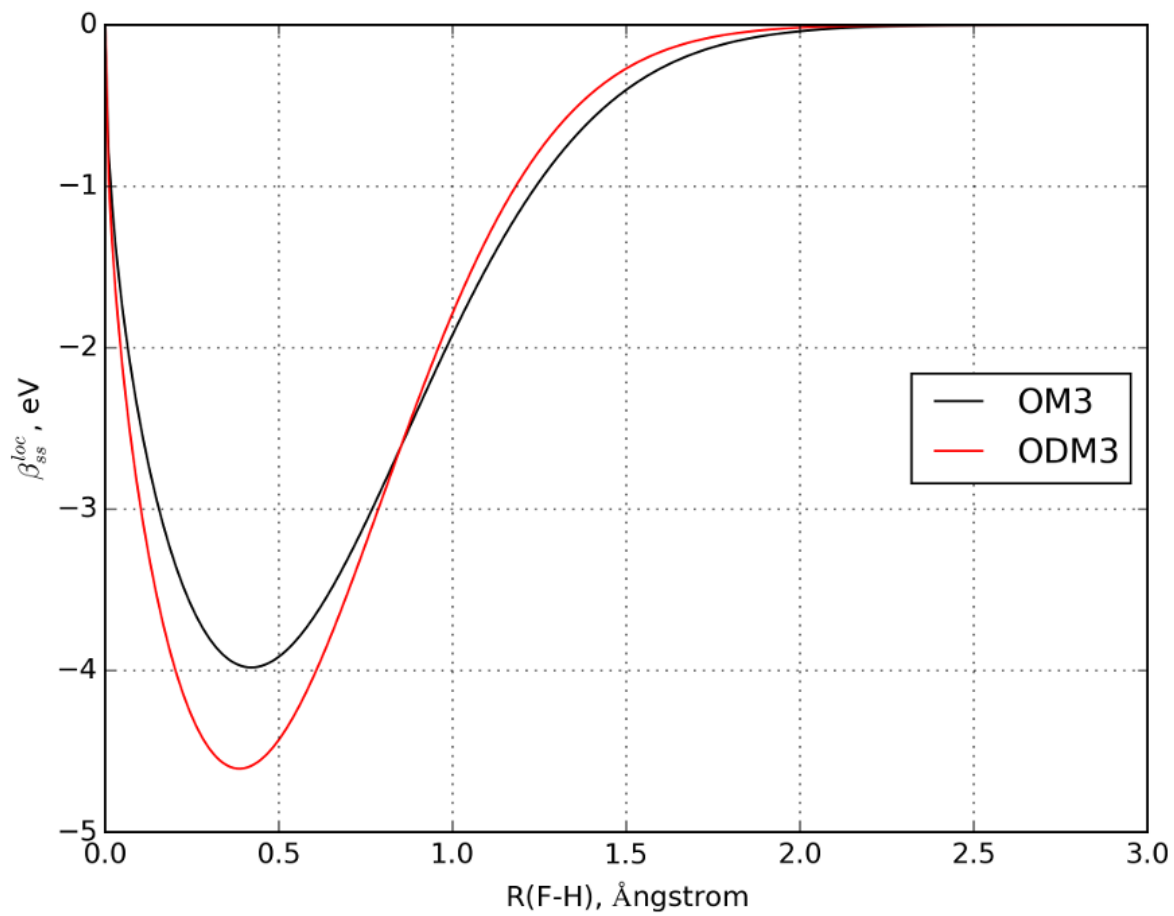

Figure S94: Comparison of  $ss$  local resonance integrals for the F–H pair calculated using standard OM3 and new ODM3 parameters.

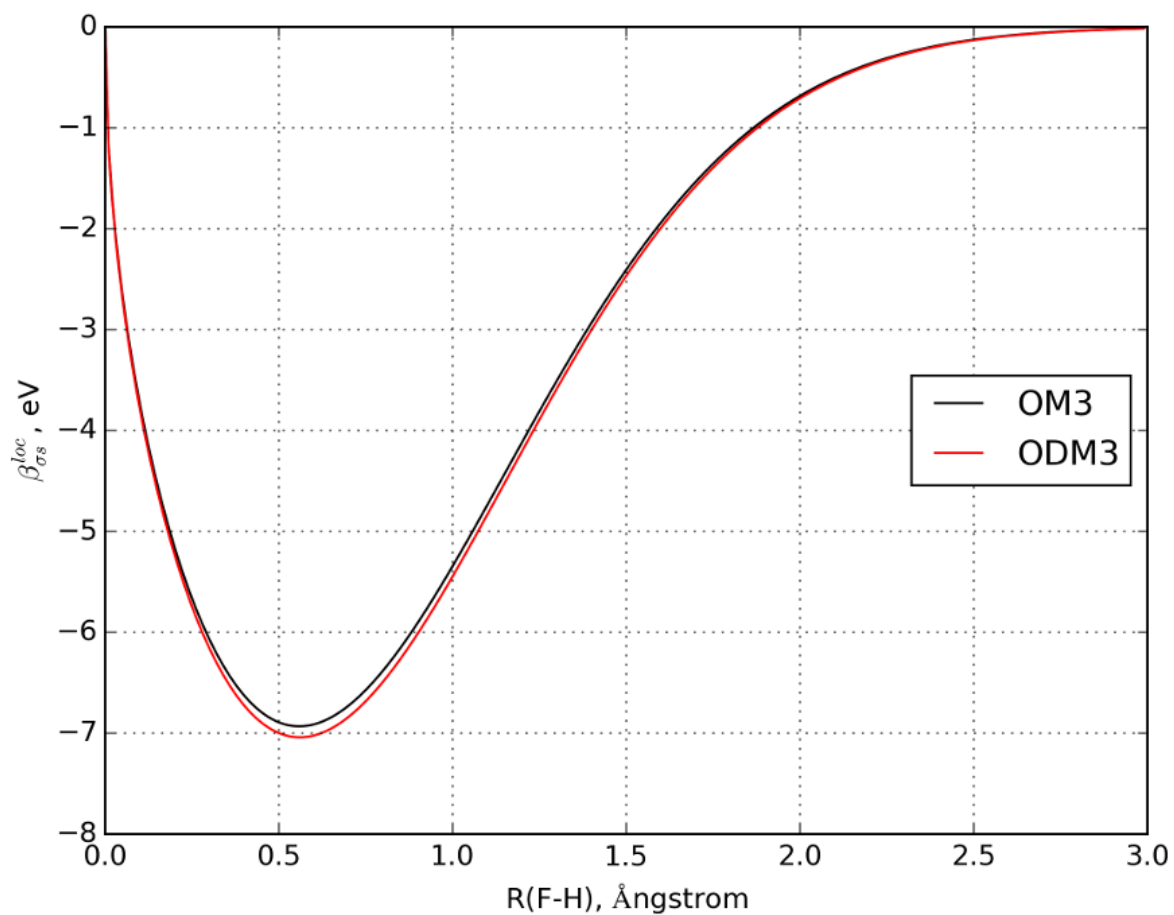

Figure S95: Comparison of  $\sigma s$  local resonance integrals for the F–H pair calculated using standard OM3 and new ODM3 parameters.

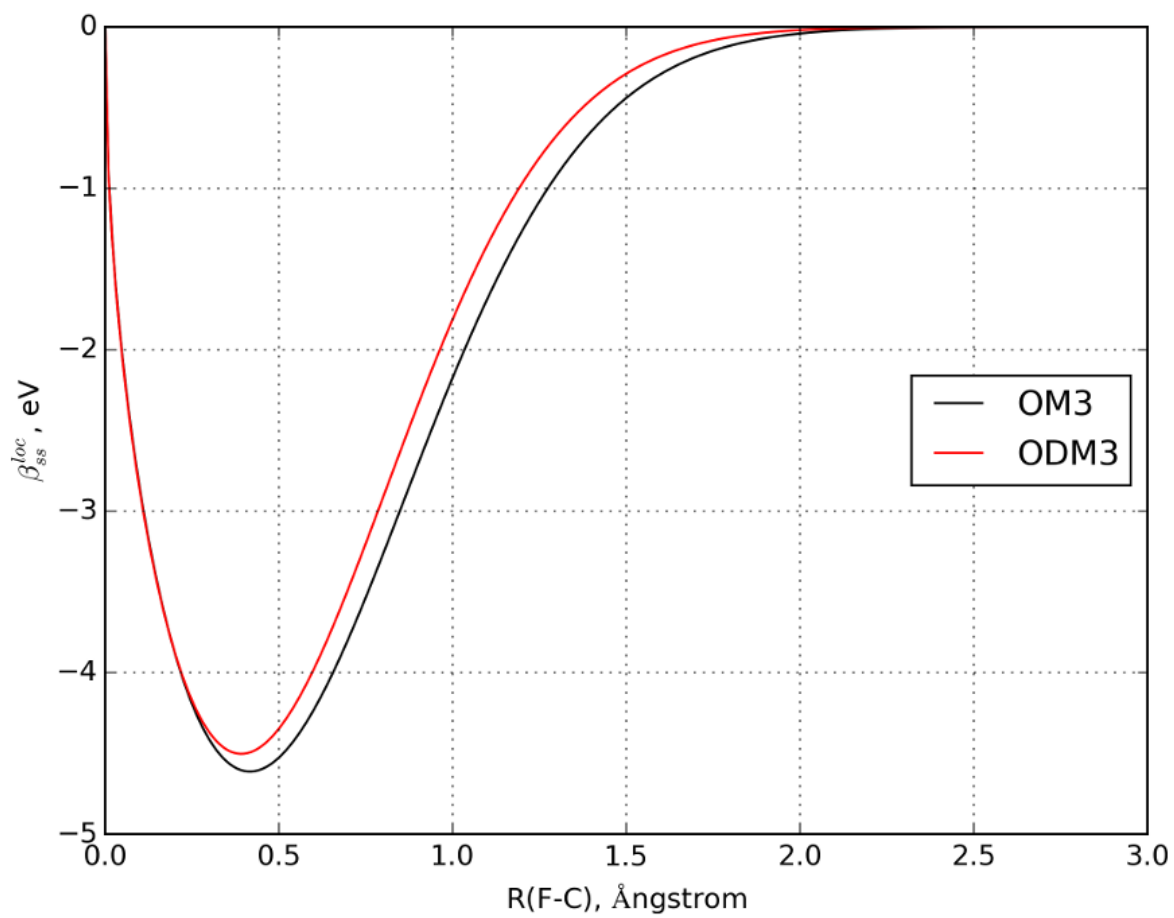

Figure S96: Comparison of  $ss$  local resonance integrals for the F–C pair calculated using standard OM3 and new ODM3 parameters.



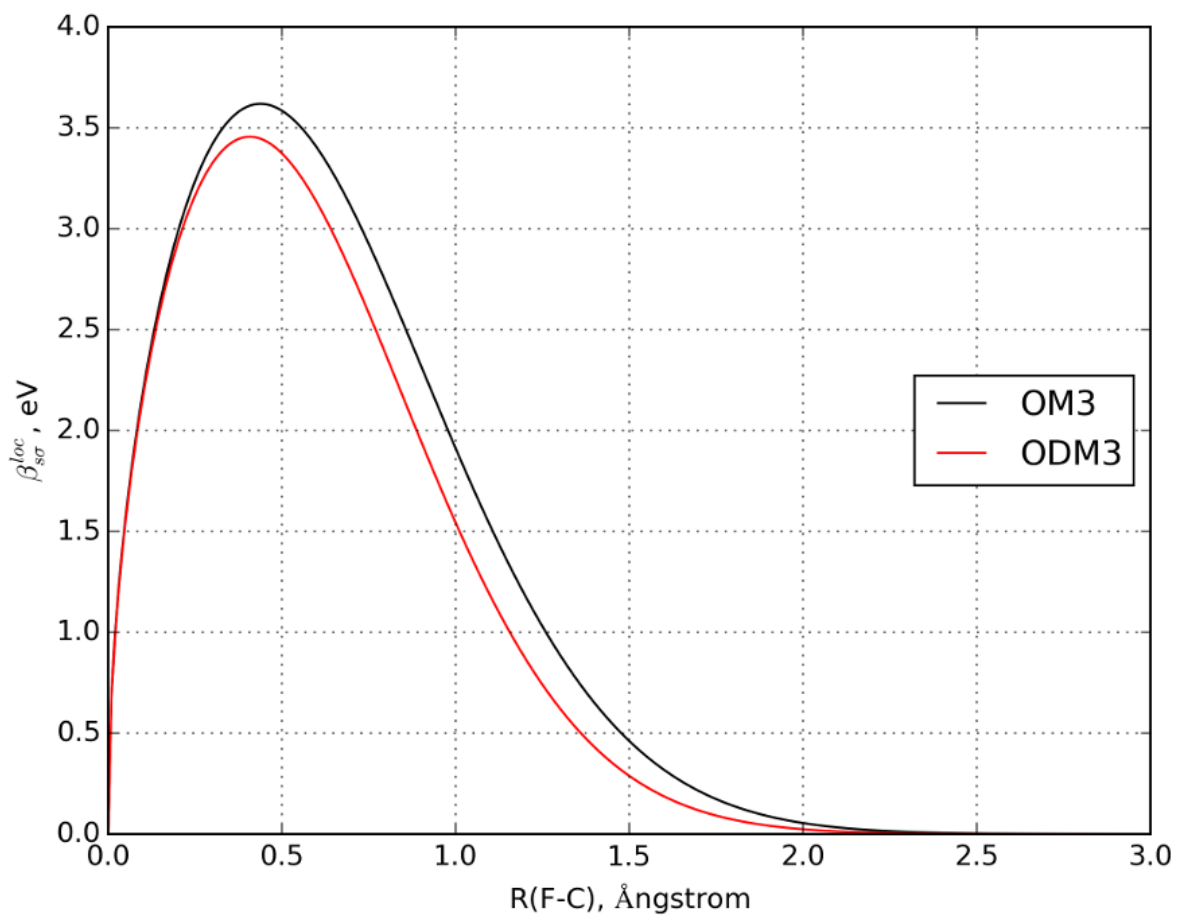

Figure S97: Comparison of  $\sigma$  local resonance integrals for the F–C pair calculated using standard OM3 and new ODM3 parameters.

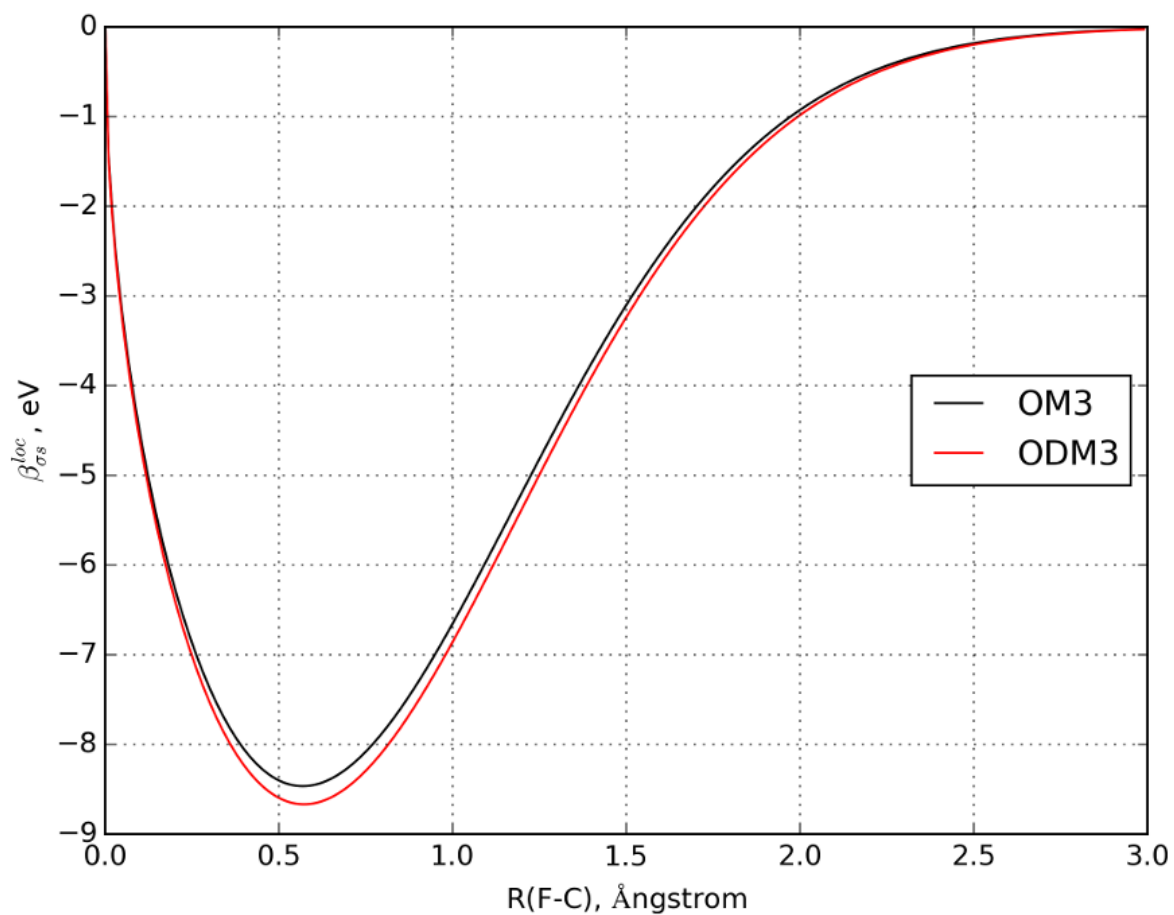

Figure S98: Comparison of  $\sigma s$  local resonance integrals for the F–C pair calculated using standard OM3 and new ODM3 parameters.

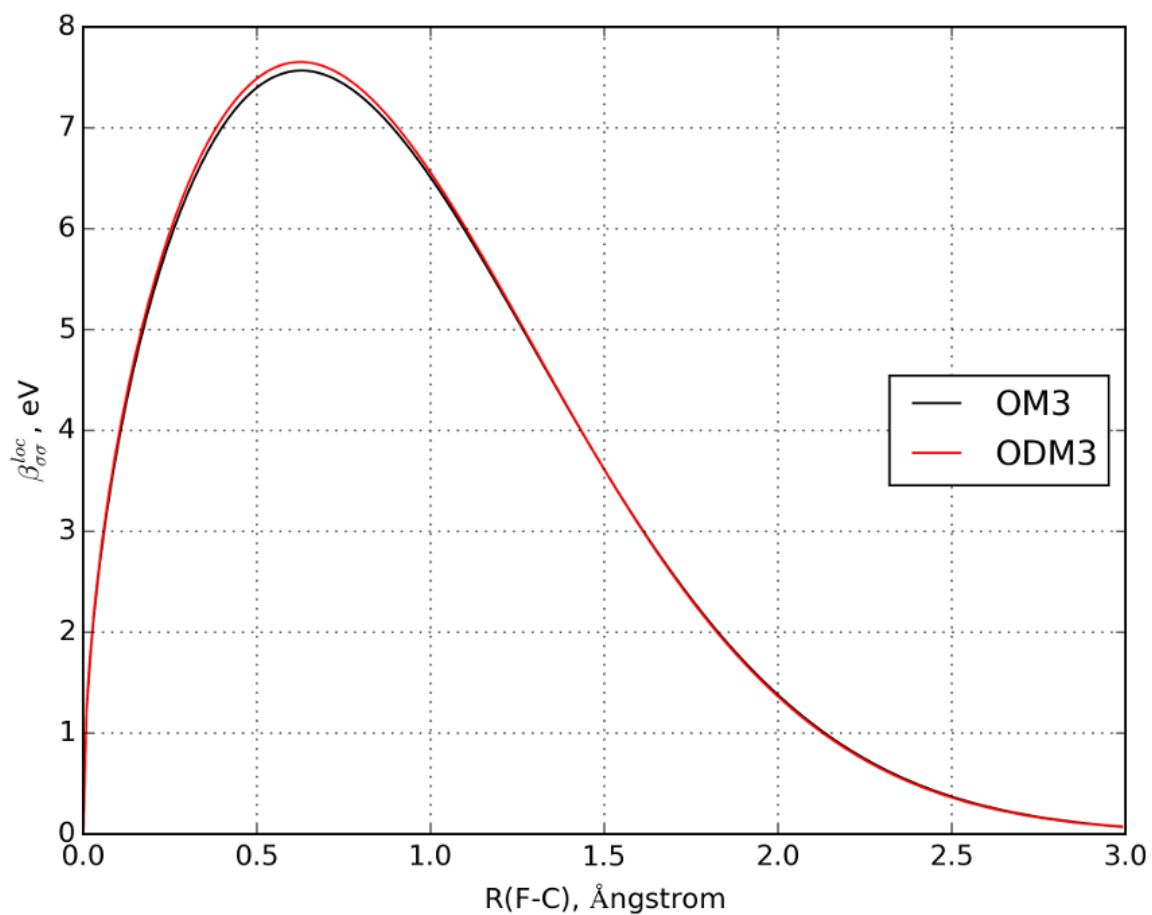

Figure S99: Comparison of  $\sigma\sigma$  local resonance integrals for the F–C pair calculated using standard OM3 and new ODM3 parameters.

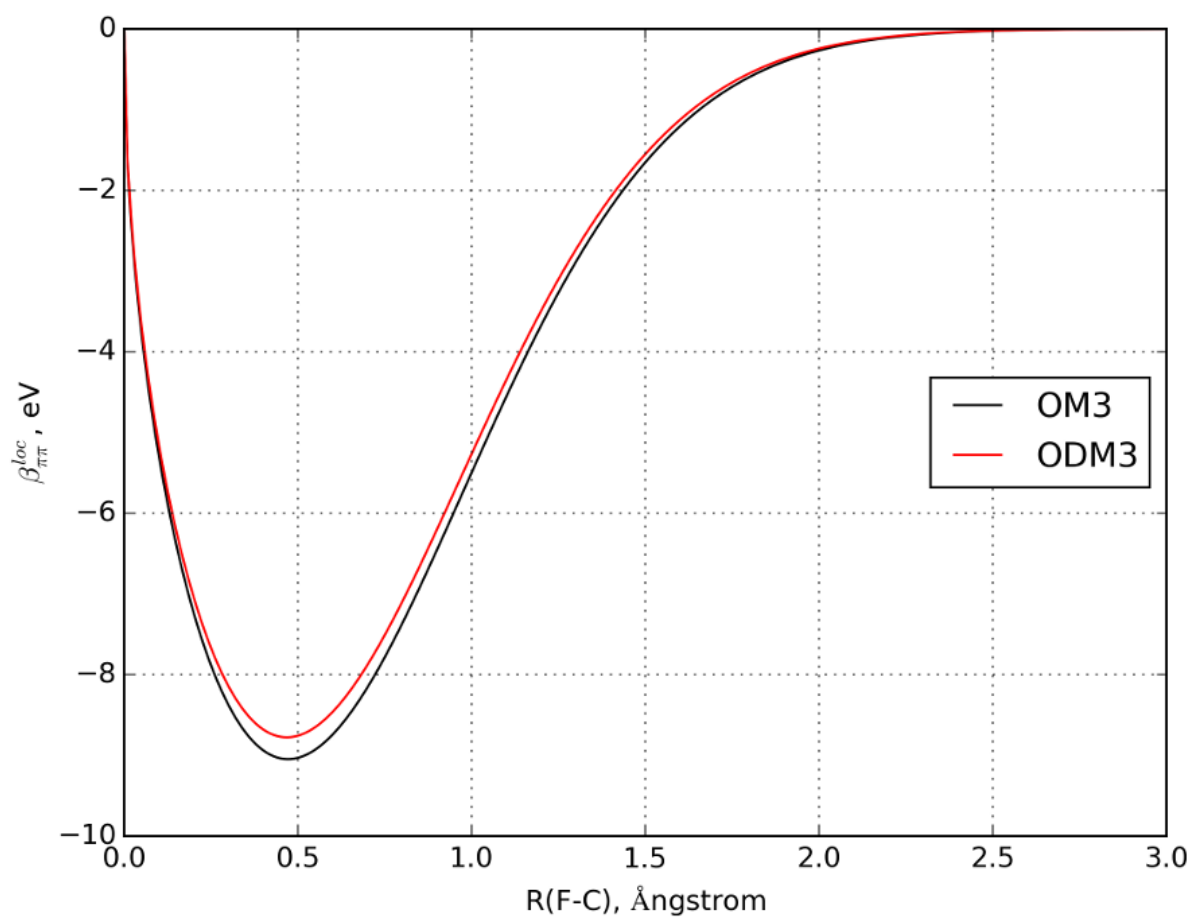

Figure S100: Comparison of  $\pi\pi$  local resonance integrals for the F–C pair calculated using standard OM3 and new ODM3 parameters.

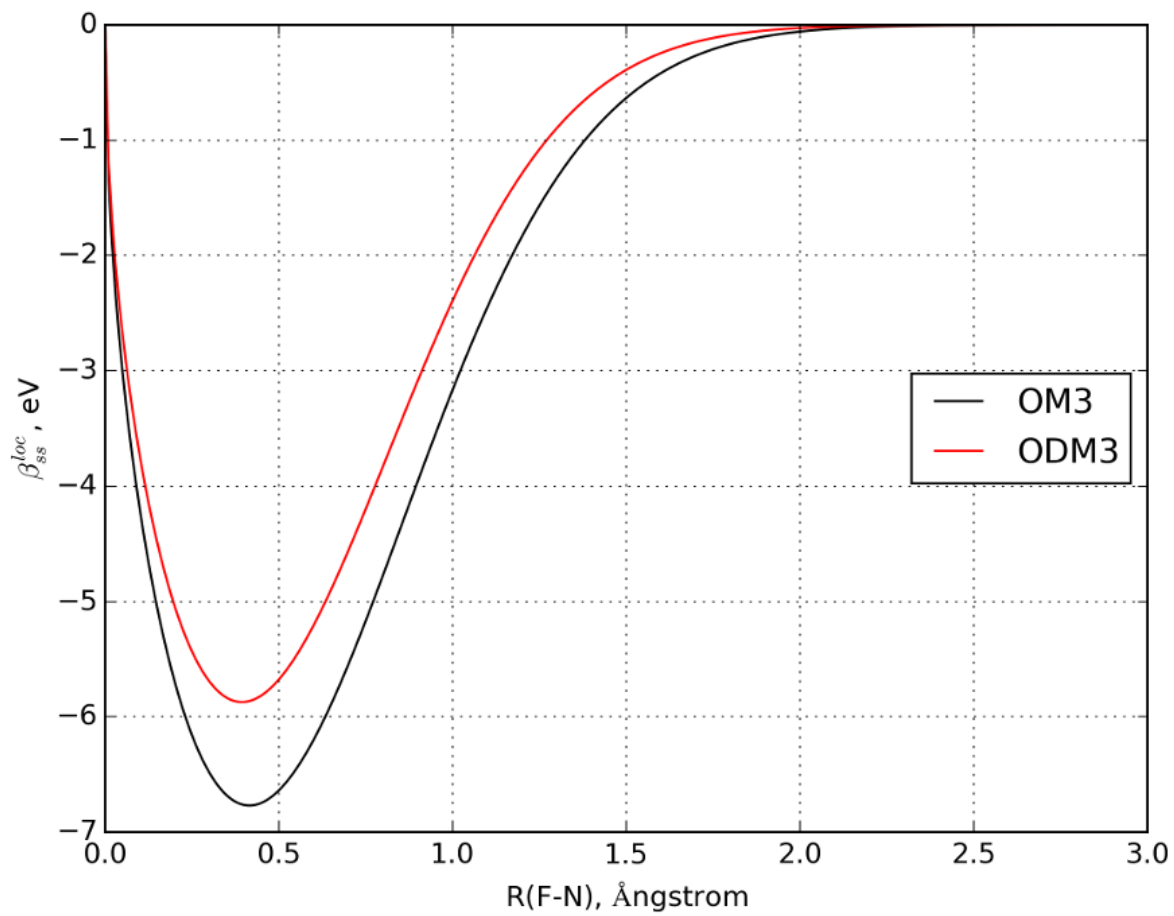

Figure S101: Comparison of *ss* local resonance integrals for the F–N pair calculated using standard OM3 and new ODM3 parameters.

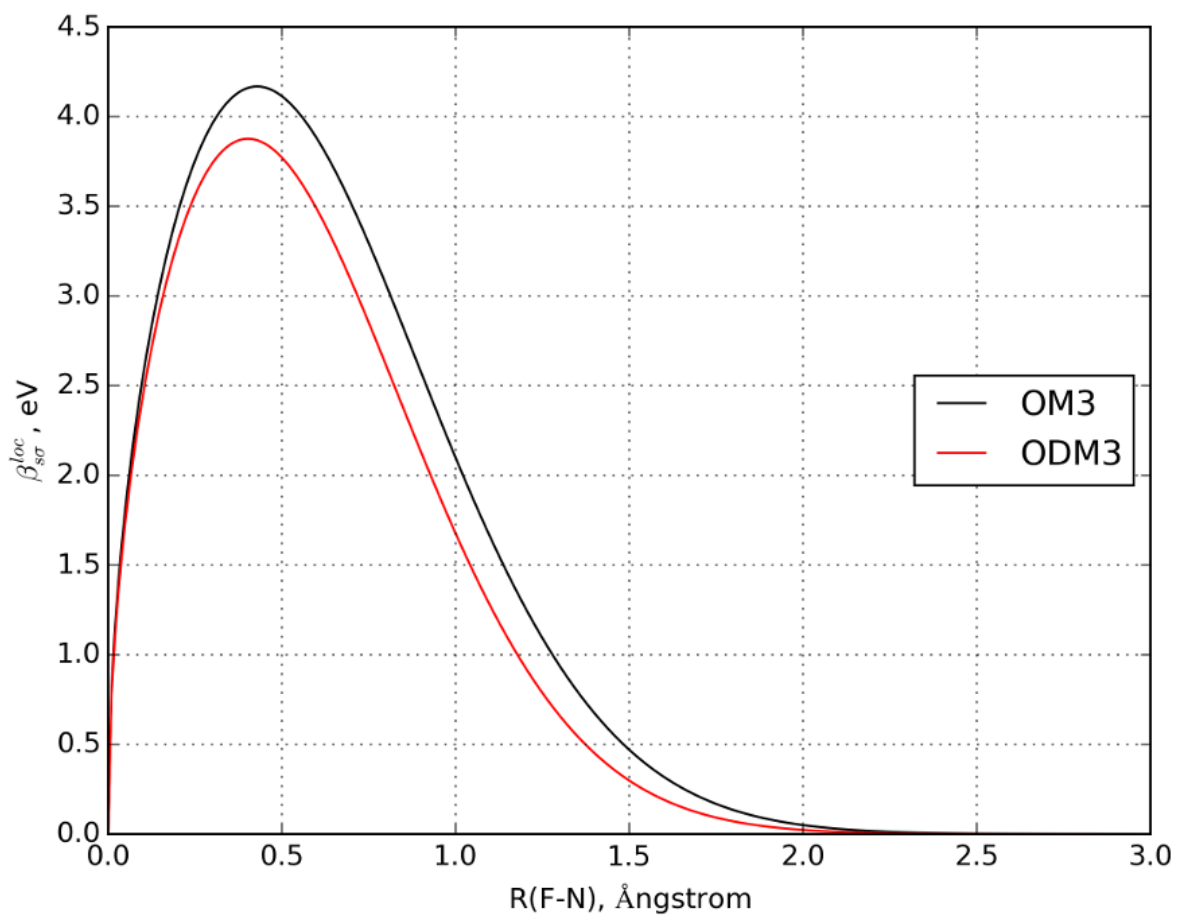

Figure S102: Comparison of  $s\sigma$  local resonance integrals for the F–N pair calculated using standard OM3 and new ODM3 parameters.

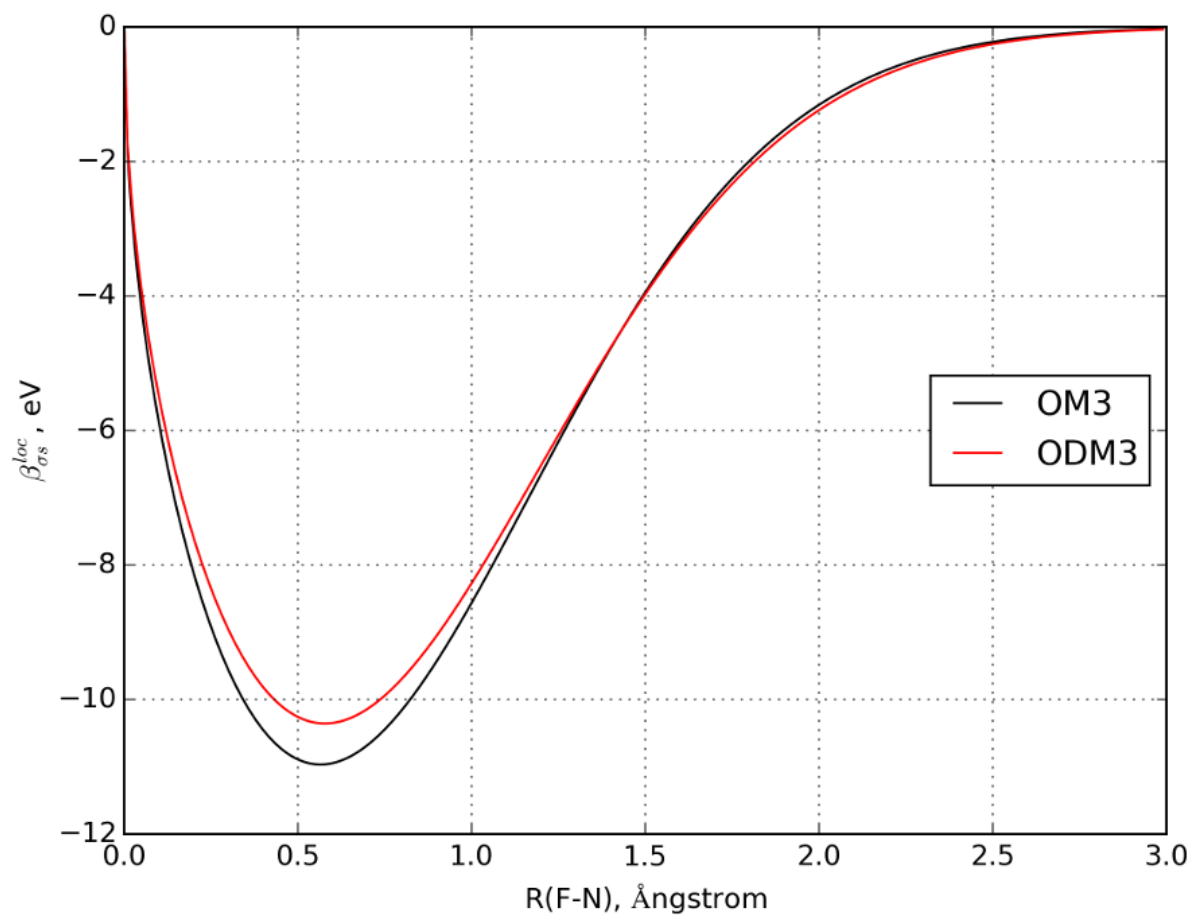

Figure S103: Comparison of  $\sigma s$  local resonance integrals for the F–N pair calculated using standard OM3 and new ODM3 parameters.

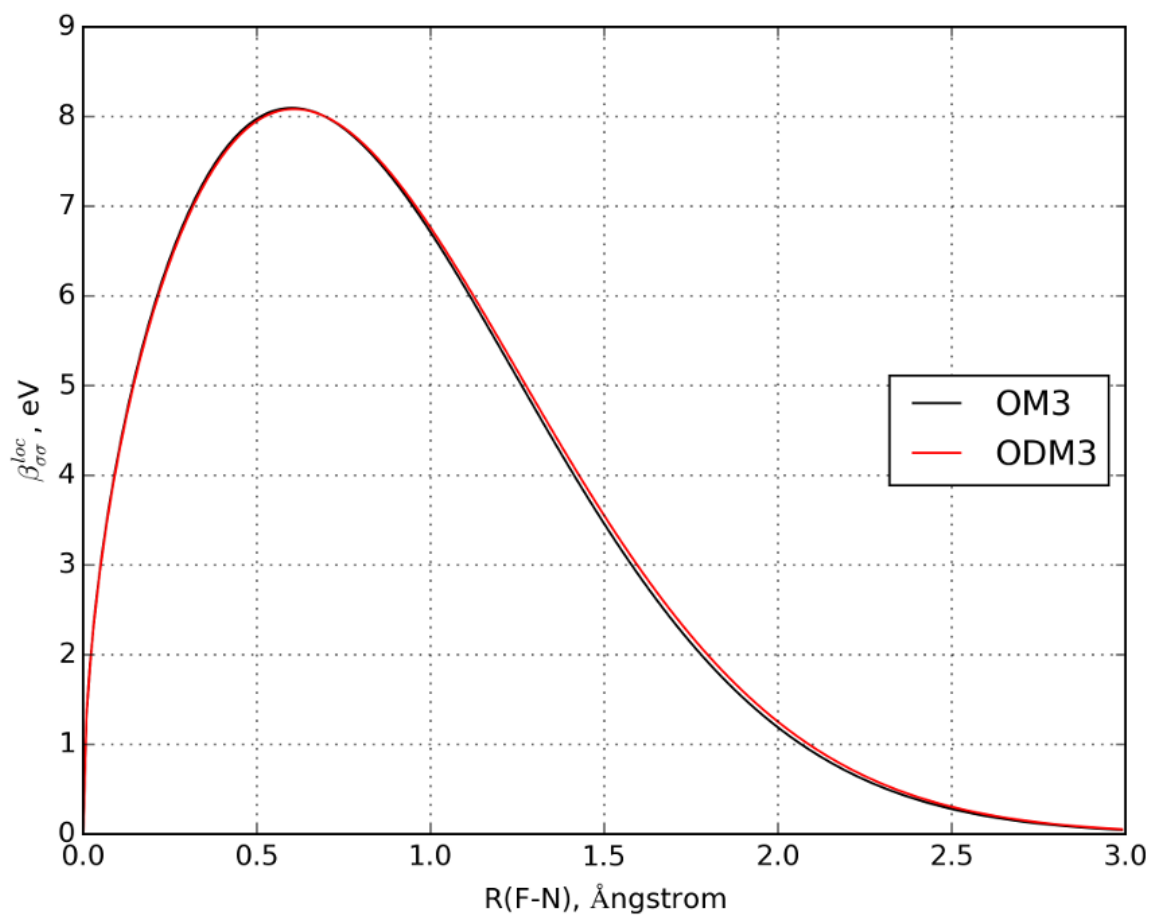

Figure S104: Comparison of  $\sigma\sigma$  local resonance integrals for the F–N pair calculated using standard OM3 and new ODM3 parameters.



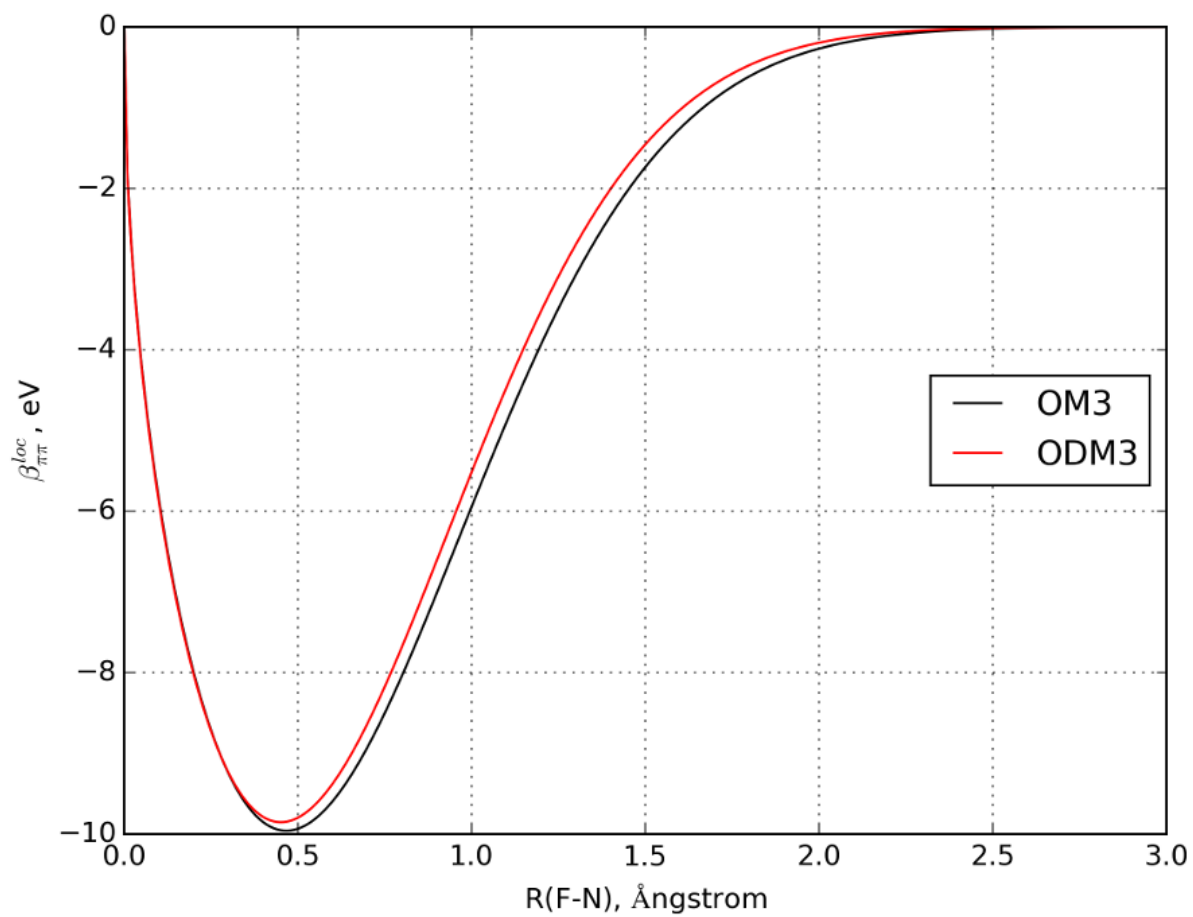

Figure S105: Comparison of  $\pi\pi$  local resonance integrals for the F–N pair calculated using standard OM3 and new ODM3 parameters.

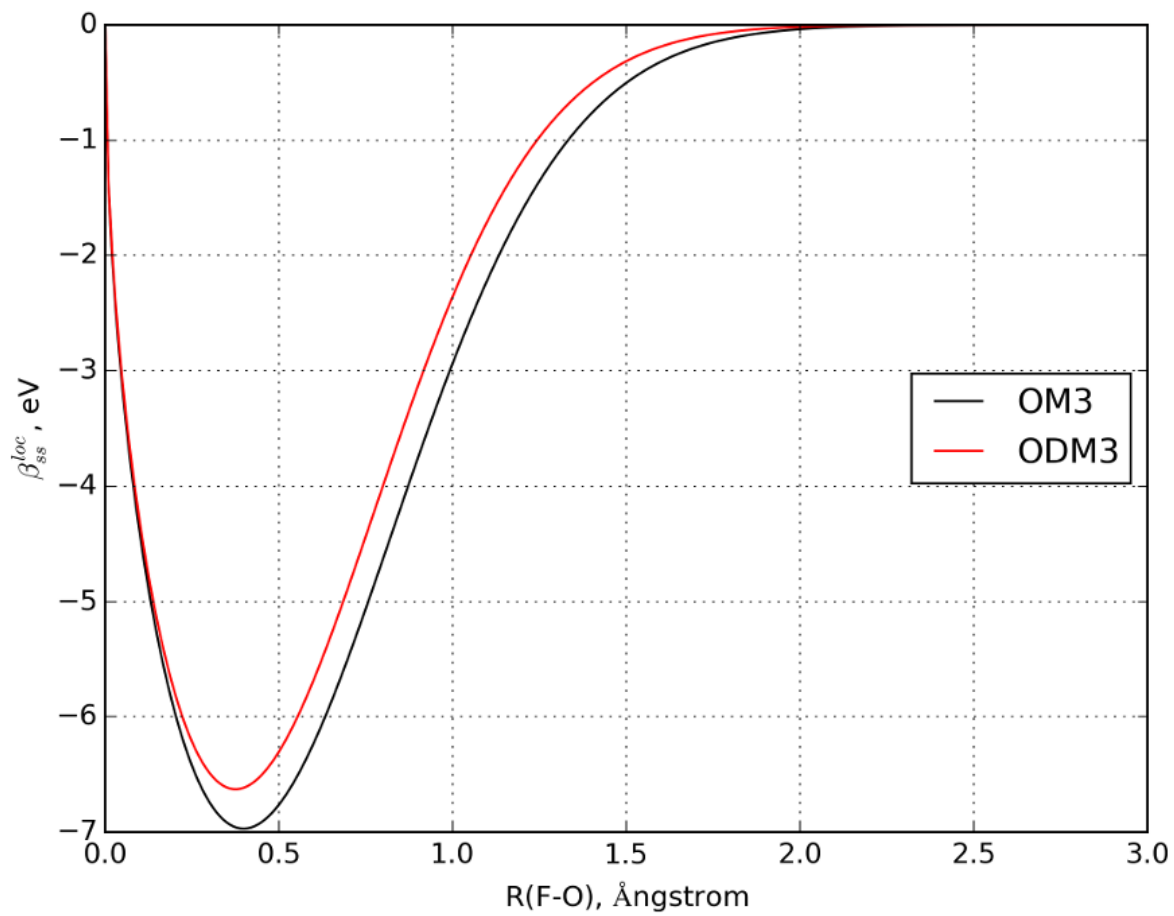

Figure S106: Comparison of *ss* local resonance integrals for the F–O pair calculated using standard OM3 and new ODM3 parameters.

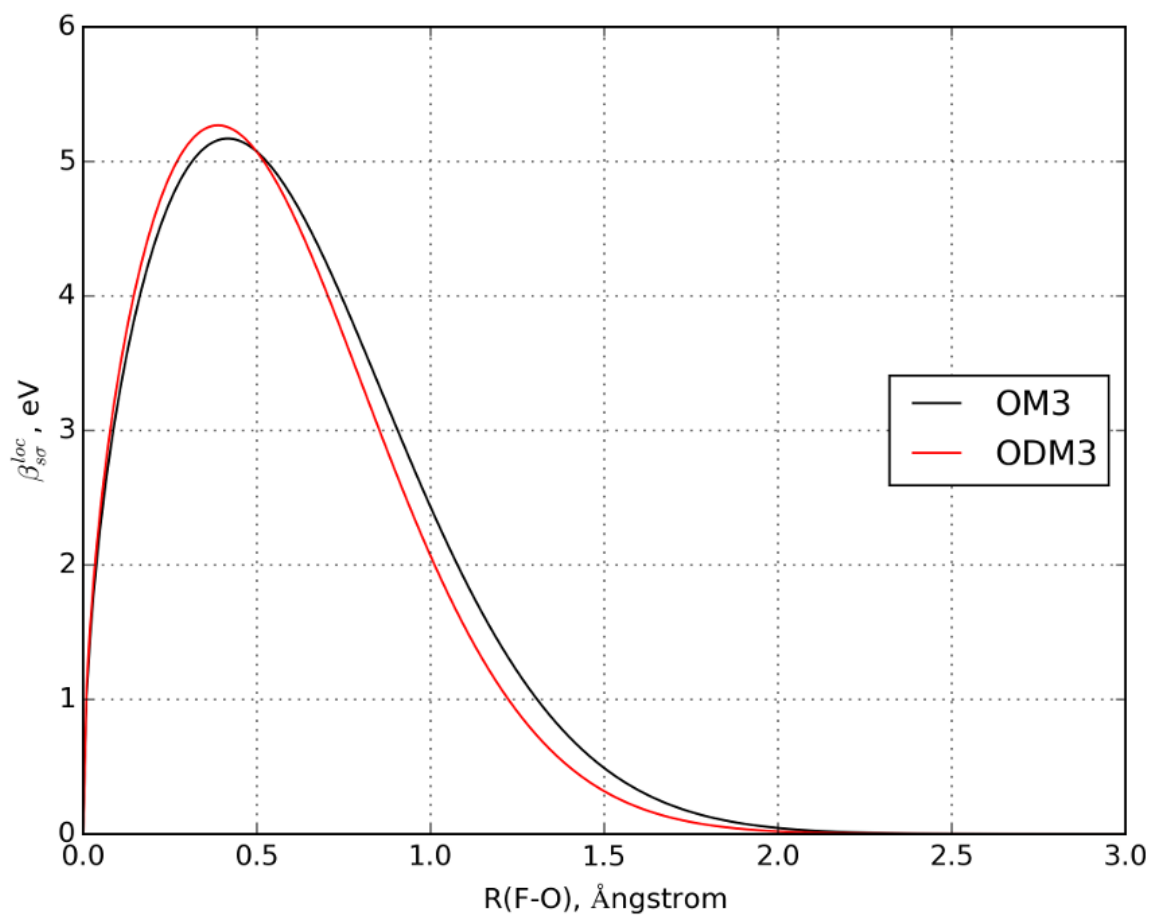

Figure S107: Comparison of  $s\sigma$  local resonance integrals for the F–O pair calculated using standard OM3 and new ODM3 parameters.

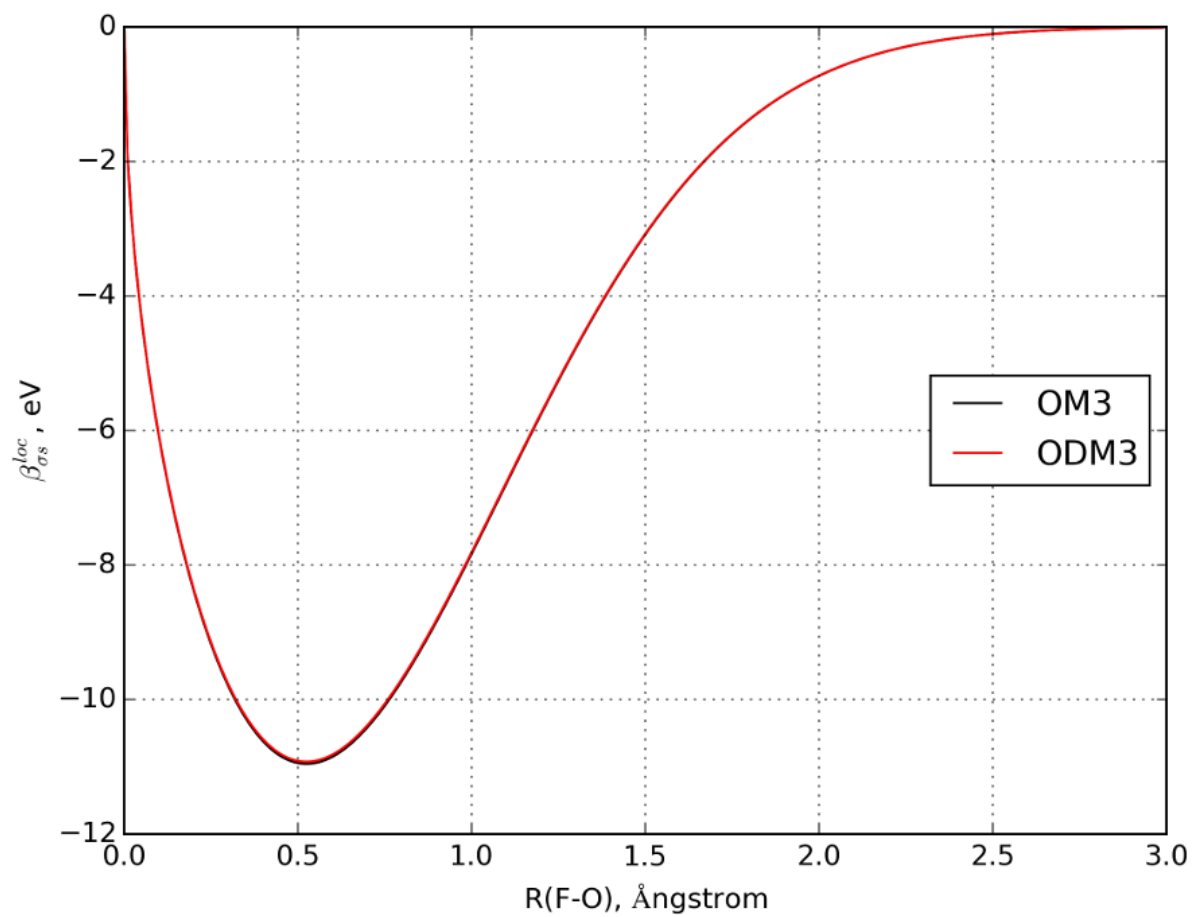

Figure S108: Comparison of  $\sigma s$  local resonance integrals for the F–O pair calculated using standard OM3 and new ODM3 parameters.

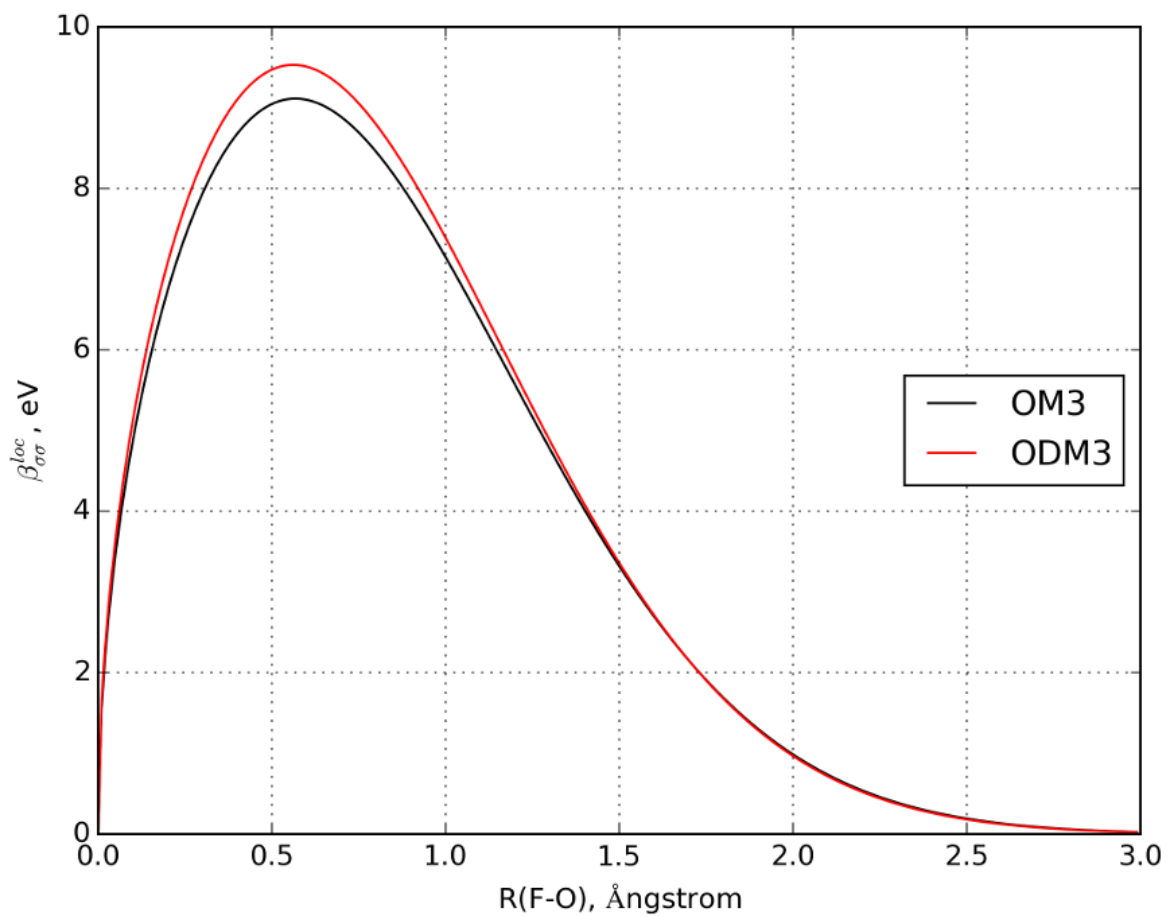

Figure S109: Comparison of  $\sigma\sigma$  local resonance integrals for the F–O pair calculated using standard OM3 and new ODM3 parameters.

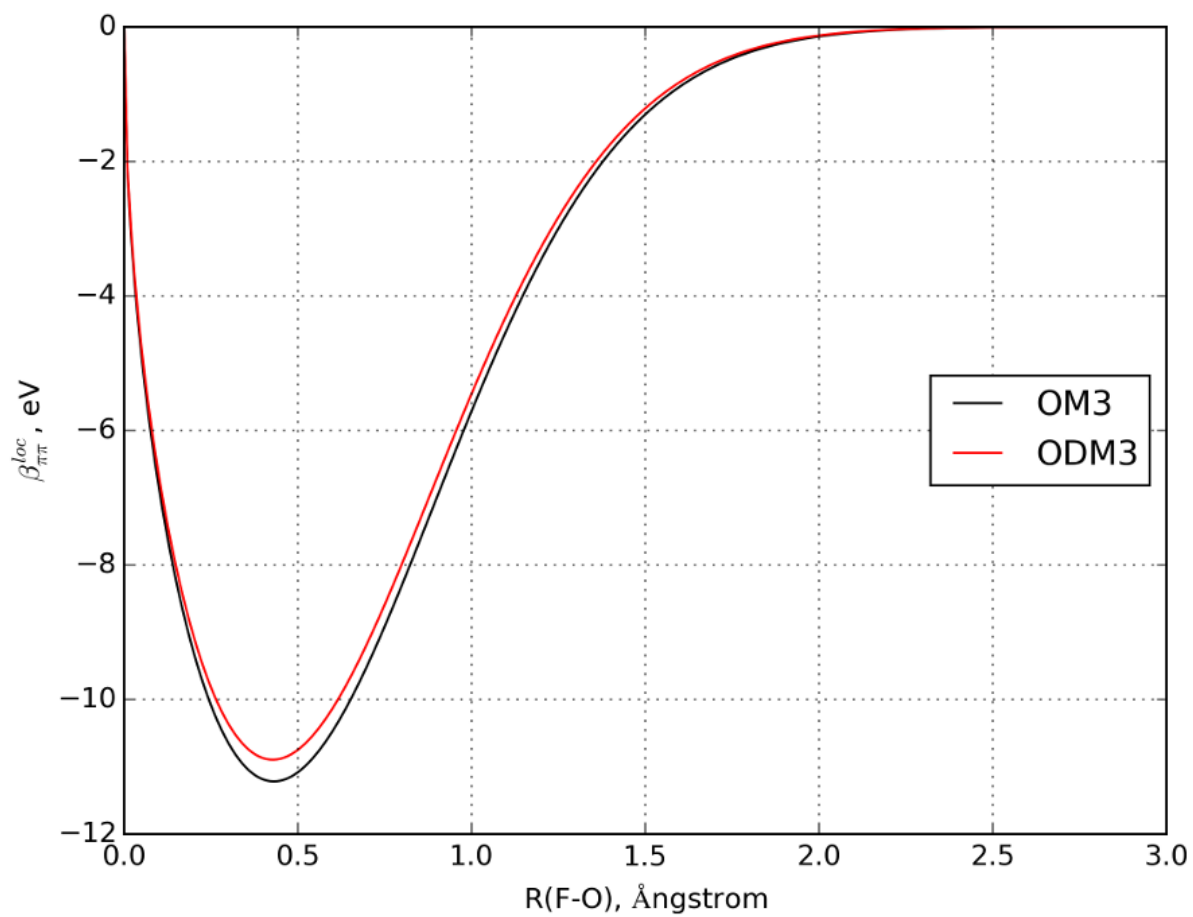

Figure S110: Comparison of  $\pi\pi$  local resonance integrals for the F–O pair calculated using standard OM3 and new ODM3 parameters.

### 3 Tables with Additional Validation Results

Table S1: Mean Absolute Errors in Heats of Formation (kcal/mol), Bond Lengths (Å), Bond Angles (degree), Ionization Potentials (eV), and Dipole Moments (D) Calculated with the OM $x$ , OM $x$ -D3T, and ODM $x$  Methods for the PDDG Set and Its Subsets

| Subset                | N   | OM2   | OM2-D3T | ODM2  | OM3   | OM3-D3T | ODM3  |
|-----------------------|-----|-------|---------|-------|-------|---------|-------|
| Heats of Formation    |     |       |         |       |       |         |       |
| overall               | 622 | 3.55  | 7.72    | 3.14  | 3.68  | 10.73   | 3.12  |
| CH                    | 254 | 2.30  | 7.88    | 2.01  | 2.38  | 11.92   | 1.92  |
| CHN                   | 89  | 5.01  | 6.29    | 4.13  | 4.86  | 8.97    | 4.42  |
| CHO                   | 238 | 3.86  | 8.49    | 3.79  | 4.58  | 10.89   | 3.85  |
| CHNO                  | 41  | 6.24  | 5.29    | 4.32  | 3.96  | 6.22    | 3.50  |
| Bond Lengths          |     |       |         |       |       |         |       |
| overall               | 153 | 0.014 | 0.014   | 0.014 | 0.018 | 0.017   | 0.014 |
| CH                    | 81  | 0.011 | 0.011   | 0.010 | 0.010 | 0.010   | 0.009 |
| CHN                   | 34  | 0.015 | 0.015   | 0.015 | 0.025 | 0.025   | 0.015 |
| CHO                   | 35  | 0.020 | 0.020   | 0.020 | 0.026 | 0.026   | 0.024 |
| CHNO                  | 3   | 0.027 | 0.027   | 0.026 | 0.044 | 0.044   | 0.039 |
| C–H                   | 38  | 0.010 | 0.010   | 0.010 | 0.013 | 0.013   | 0.011 |
| C–C                   | 52  | 0.010 | 0.010   | 0.010 | 0.010 | 0.010   | 0.010 |
| C=C                   | 15  | 0.009 | 0.009   | 0.008 | 0.009 | 0.009   | 0.008 |
| C≡C                   | 5   | 0.019 | 0.019   | 0.019 | 0.025 | 0.025   | 0.023 |
| N–C                   | 7   | 0.018 | 0.018   | 0.017 | 0.018 | 0.018   | 0.014 |
| N–H                   | 4   | 0.007 | 0.007   | 0.009 | 0.044 | 0.044   | 0.018 |
| N≡C                   | 5   | 0.017 | 0.017   | 0.018 | 0.046 | 0.046   | 0.022 |
| O–H                   | 6   | 0.037 | 0.037   | 0.035 | 0.058 | 0.057   | 0.057 |
| O–C                   | 7   | 0.018 | 0.018   | 0.017 | 0.022 | 0.022   | 0.021 |
| O=C                   | 9   | 0.015 | 0.015   | 0.021 | 0.019 | 0.018   | 0.015 |
| Bond Angles           |     |       |         |       |       |         |       |
| overall               | 54  | 2.17  | 2.17    | 2.04  | 1.89  | 1.91    | 1.98  |
| CH                    | 20  | 1.37  | 1.40    | 1.36  | 0.91  | 1.00    | 1.00  |
| CHN                   | 12  | 1.30  | 1.28    | 1.23  | 1.33  | 1.31    | 1.54  |
| CHO                   | 21  | 3.08  | 3.07    | 2.82  | 2.76  | 2.75    | 2.86  |
| ∠CCH                  | 16  | 1.02  | 1.03    | 1.05  | 0.96  | 1.01    | 1.13  |
| ∠CCC                  | 13  | 1.78  | 1.82    | 1.74  | 1.19  | 1.26    | 1.25  |
| ∠OCH                  | 3   | 3.03  | 3.04    | 3.33  | 3.02  | 3.03    | 3.09  |
| ∠COH                  | 3   | 2.75  | 2.73    | 2.41  | 3.23  | 3.18    | 3.82  |
| ∠OCC                  | 5   | 2.59  | 2.58    | 2.25  | 1.81  | 1.79    | 1.83  |
| Ionization Potentials |     |       |         |       |       |         |       |
| overall               | 98  | 0.31  | 0.31    | 0.27  | 0.51  | 0.52    | 0.49  |
| CH                    | 41  | 0.28  | 0.28    | 0.24  | 0.45  | 0.45    | 0.40  |
| CHN                   | 21  | 0.26  | 0.27    | 0.26  | 0.43  | 0.43    | 0.47  |
| CHO                   | 29  | 0.38  | 0.38    | 0.31  | 0.71  | 0.71    | 0.69  |
| CHNO                  | 4   | 0.29  | 0.29    | 0.31  | 0.28  | 0.29    | 0.25  |
| Dipole Moments        |     |       |         |       |       |         |       |
| Overall               | 47  | 0.27  | 0.27    | 0.27  | 0.25  | 0.25    | 0.23  |
| CH                    | 10  | 0.11  | 0.11    | 0.10  | 0.11  | 0.11    | 0.11  |
| CHN                   | 14  | 0.25  | 0.25    | 0.21  | 0.30  | 0.30    | 0.32  |
| CHO                   | 20  | 0.34  | 0.34    | 0.39  | 0.27  | 0.27    | 0.24  |
| CHNO                  | 3   | 0.44  | 0.44    | 0.40  | 0.41  | 0.41    | 0.19  |



Table S2: Mean Absolute Errors in Heats of Formation (kcal/mol), Bond Lengths (Å), Bond Angles (degree), Ionization Potentials (eV), and Dipole Moments (D) Calculated with the OM $x$ , OM $x$ -D3T, and ODM $x$  Methods for the PM7-CHNOF Set and Its Subsets

| Subset                | N    | OM2   | OM2-D3T | ODM2  | OM3   | OM3-D3T | ODM3  |
|-----------------------|------|-------|---------|-------|-------|---------|-------|
| Heats of Formation    |      |       |         |       |       |         |       |
| Overall               | 1168 | 4.85  | 11.07   | 4.71  | 4.83  | 15.07   | 4.28  |
| DA                    | 5    | 3.26  | 3.16    | 3.14  | 2.15  | 2.14    | 2.66  |
| CH                    | 310  | 4.16  | 14.25   | 4.15  | 3.63  | 20.12   | 3.50  |
| CHN                   | 214  | 5.43  | 9.23    | 5.03  | 5.69  | 14.15   | 5.20  |
| CHO                   | 373  | 4.22  | 11.48   | 4.46  | 5.18  | 14.42   | 4.16  |
| CHF                   | 32   | 3.50  | 6.11    | 4.70  | 2.44  | 6.16    | 2.27  |
| CHNO                  | 234  | 6.46  | 8.74    | 5.58  | 5.43  | 11.77   | 4.97  |
| Bond Lengths          |      |       |         |       |       |         |       |
| Overall               | 175  | 0.015 | 0.015   | 0.015 | 0.019 | 0.019   | 0.017 |
| DA                    | 4    | 0.036 | 0.036   | 0.032 | 0.053 | 0.053   | 0.038 |
| CH                    | 74   | 0.011 | 0.011   | 0.010 | 0.011 | 0.011   | 0.010 |
| CHN                   | 31   | 0.014 | 0.014   | 0.014 | 0.020 | 0.020   | 0.013 |
| CHO                   | 31   | 0.016 | 0.016   | 0.017 | 0.021 | 0.021   | 0.019 |
| CHF                   | 18   | 0.016 | 0.016   | 0.015 | 0.020 | 0.020   | 0.017 |
| CHNO                  | 17   | 0.028 | 0.028   | 0.027 | 0.040 | 0.041   | 0.042 |
| Bond Angles           |      |       |         |       |       |         |       |
| Overall               | 90   | 1.76  | 1.75    | 1.64  | 1.54  | 1.54    | 1.54  |
| CH                    | 32   | 0.90  | 0.92    | 0.83  | 0.49  | 0.53    | 0.47  |
| CHN                   | 20   | 1.44  | 1.43    | 1.32  | 1.35  | 1.32    | 1.45  |
| CHO                   | 20   | 2.33  | 2.33    | 1.99  | 1.98  | 1.98    | 1.93  |
| CHF                   | 11   | 1.47  | 1.47    | 1.37  | 1.11  | 1.11    | 1.05  |
| CHNO                  | 7    | 5.42  | 5.30    | 5.71  | 6.26  | 6.26    | 6.37  |
| Ionization Potentials |      |       |         |       |       |         |       |
| Overall               | 104  | 0.33  | 0.33    | 0.29  | 0.53  | 0.53    | 0.51  |
| CH                    | 36   | 0.25  | 0.25    | 0.21  | 0.47  | 0.47    | 0.42  |
| CHN                   | 18   | 0.28  | 0.28    | 0.31  | 0.42  | 0.43    | 0.46  |
| CHO                   | 29   | 0.44  | 0.44    | 0.36  | 0.77  | 0.78    | 0.74  |
| CHF                   | 14   | 0.34  | 0.34    | 0.33  | 0.29  | 0.29    | 0.33  |
| CHNO                  | 5    | 0.47  | 0.47    | 0.43  | 0.55  | 0.55    | 0.47  |
| Dipole Moments        |      |       |         |       |       |         |       |
| Overall               | 58   | 0.24  | 0.24    | 0.27  | 0.22  | 0.22    | 0.21  |
| CH                    | 10   | 0.12  | 0.12    | 0.12  | 0.12  | 0.12    | 0.12  |
| CHN                   | 17   | 0.25  | 0.25    | 0.28  | 0.30  | 0.30    | 0.30  |
| CHO                   | 20   | 0.28  | 0.28    | 0.34  | 0.23  | 0.23    | 0.21  |
| CHF                   | 10   | 0.25  | 0.25    | 0.25  | 0.16  | 0.16    | 0.17  |

Table S3: Mean Absolute Errors in Atomization Enthalpies at 298 K (kcal/mol) Calculated with the  $OM_x$ ,  $OM_x$ -D3T, and  $ODM_x$  Methods for the C7H10O2 Set

| Subset  | N    | OM2  | OM2-D3T | ODM2 | OM3  | OM3-D3T | ODM3 |
|---------|------|------|---------|------|------|---------|------|
| overall | 6095 | 6.30 | 6.30    | 6.22 | 7.67 | 7.68    | 7.50 |

Table S4: Mean Absolute Errors in Interaction Energies (kcal/mol) for the X40×10-CHNOF Set and Its Subsets at the Reference Geometries as Calculated with the OM*x*, OM*x*-D3T, and ODM*x* Methods

| Subset                    | N   | OM2  | OM2-D3T | ODM2 | OM3                 | OM3-D3T             | ODM3                |
|---------------------------|-----|------|---------|------|---------------------|---------------------|---------------------|
| Overall                   | 100 | 1.62 | 1.38    | 1.37 | 1.89 <sup>a,b</sup> | 1.62 <sup>a,b</sup> | 1.87 <sup>a,b</sup> |
| London Dispersion         | 10  | 0.29 | 0.17    | 0.17 | 0.41 <sup>a,b</sup> | 0.16 <sup>a,b</sup> | 0.23 <sup>a,b</sup> |
| Induction                 | 20  | 0.44 | 0.16    | 0.13 | 0.57                | 0.12                | 0.16                |
| Dipole-Dipole Interaction | 10  | 0.61 | 0.44    | 0.38 | 0.70                | 0.34                | 0.38                |
| Stacking                  | 20  | 3.07 | 2.71    | 2.74 | 2.90                | 2.59                | 2.45                |
| Hydrogen Bonds            | 40  | 2.07 | 1.86    | 1.85 | 2.67                | 2.52                | 3.14                |
| Scaled by 0.80            | 10  | 2.67 | 3.99    | 3.97 | 2.70                | 4.33                | 4.70                |
| Scaled by 0.85            | 10  | 1.26 | 2.25    | 2.45 | 2.09                | 3.06                | 3.41                |
| Scaled by 0.90            | 10  | 1.65 | 1.44    | 1.58 | 2.36                | 2.16                | 2.48                |
| Scaled by 0.95            | 10  | 2.06 | 1.12    | 1.17 | 2.52                | 1.54                | 1.93                |
| Near Equilibrium          | 10  | 2.16 | 1.09    | 0.96 | 2.47                | 1.26                | 1.58                |
| Scaled by 1.05            | 10  | 2.10 | 1.17    | 1.04 | 2.29                | 1.18                | 1.41                |
| Scaled by 1.10            | 10  | 1.96 | 1.15    | 1.04 | 2.06                | 1.12                | 1.30                |
| Scaled by 1.25            | 10  | 1.39 | 0.89    | 0.84 | 1.36                | 0.80                | 0.89                |
| Scaled by 1.50            | 10  | 0.72 | 0.50    | 0.49 | 0.64 <sup>a</sup>   | 0.41 <sup>a</sup>   | 0.50 <sup>a</sup>   |
| Scaled by 2.00            | 10  | 0.23 | 0.18    | 0.18 | 0.21 <sup>b</sup>   | 0.16 <sup>b</sup>   | 0.18 <sup>b</sup>   |

<sup>a</sup> Dimer methane-F<sub>2</sub> scaled by 1.50 could not be converged at ODM3. <sup>b</sup> Dimer methane-F<sub>2</sub> scaled by 2.00 could not be converged at OM3, OM3-D3T, and ODM3.

Table S5: Mean Absolute Errors in Bond Lengths ( $\text{\AA}$ ) and Bond Angles (degree) Calculated with the  $\text{OM}_x/\text{MRCI}$ ,  $\text{OM}_x\text{-D3T}/\text{MRCI}$ , and  $\text{ODM}_x/\text{MRCI}$  Methods for the ExGeom Set and Its Subsets Relative to the CC2 Level of Theory

| Subset       | N   | OM2   | OM2-D3T | ODM2  | OM3   | OM3-D3T | ODM3  |
|--------------|-----|-------|---------|-------|-------|---------|-------|
| Bond Lengths |     |       |         |       |       |         |       |
| overall      | 543 | 0.018 | 0.018   | 0.018 | 0.021 | 0.021   | 0.018 |
| singlet      | 377 | 0.018 | 0.018   | 0.018 | 0.022 | 0.022   | 0.019 |
| triplet      | 166 | 0.018 | 0.018   | 0.016 | 0.019 | 0.019   | 0.017 |
| C–C bonds    | 298 | 0.013 | 0.013   | 0.013 | 0.015 | 0.015   | 0.014 |
| C–H bonds    | 75  | 0.011 | 0.011   | 0.010 | 0.017 | 0.017   | 0.015 |
| C–O bonds    | 62  | 0.045 | 0.045   | 0.037 | 0.041 | 0.041   | 0.039 |
| C–N bonds    | 68  | 0.023 | 0.023   | 0.023 | 0.032 | 0.032   | 0.026 |
| N–H bonds    | 33  | 0.009 | 0.009   | 0.020 | 0.026 | 0.025   | 0.006 |
| Bond Angles  |     |       |         |       |       |         |       |
| overall      | 287 | 1.99  | 2.00    | 1.92  | 2.00  | 2.01    | 2.04  |
| singlet      | 187 | 1.99  | 2.01    | 1.96  | 2.05  | 2.07    | 2.15  |
| triplet      | 100 | 1.98  | 1.98    | 1.85  | 1.90  | 1.91    | 1.83  |

## 4 Tables with Reference and Calculated Property Values for Individual Molecules in Benchmark Sets

Table S6: Benchmark Results for the CHNO Set. Heats of Formation (kcal/mol)

| Species                  | Ref.               | OM2   | OM2-D3T | ODM2  | OM3   | OM3-D3T | ODM3  |
|--------------------------|--------------------|-------|---------|-------|-------|---------|-------|
| Hydrogen                 | 0.0 <sup>a</sup>   | -3.4  | -3.5    | -0.1  | -0.0  | -0.1    | 0.0   |
| Methane                  | -17.9 <sup>b</sup> | -19.3 | -19.9   | -19.3 | -18.0 | -19.1   | -17.8 |
| Ethane                   | -20.0 <sup>b</sup> | -21.2 | -23.0   | -20.8 | -20.8 | -23.6   | -20.0 |
| Ethylene                 | 12.5 <sup>b</sup>  | 12.9  | 11.7    | 12.9  | 13.9  | 12.0    | 13.7  |
| Acetylene                | 54.5 <sup>b</sup>  | 54.2  | 53.6    | 53.9  | 54.7  | 53.7    | 54.2  |
| Propane                  | -25.0 <sup>b</sup> | -25.5 | -28.7   | -25.2 | -25.4 | -30.4   | -24.8 |
| Propene ecl              | 4.8 <sup>b</sup>   | 4.7   | 2.3     | 4.8   | 5.0   | 1.1     | 5.0   |
| Propyne                  | 44.2 <sup>b</sup>  | 44.5  | 42.9    | 44.3  | 44.1  | 41.5    | 44.3  |
| Allene                   | 45.5 <sup>b</sup>  | 45.9  | 44.3    | 45.7  | 45.5  | 42.9    | 45.7  |
| n-Butane                 | -30.0 <sup>b</sup> | -30.1 | -34.8   | -29.9 | -30.3 | -37.5   | -29.8 |
| Isobutane                | -32.1 <sup>b</sup> | -31.8 | -36.7   | -31.9 | -31.3 | -38.8   | -31.1 |
| But-1-ene H-ecl          | 0.0 <sup>b</sup>   | 0.1   | -3.8    | 0.1   | 0.3   | -5.7    | 0.3   |
| trans-2-Butene           | -2.7 <sup>b</sup>  | -3.8  | -7.5    | -3.7  | -4.0  | -9.8    | -3.9  |
| cis-2-Butene             | -1.7 <sup>b</sup>  | -1.9  | -5.8    | -2.0  | -2.2  | -8.2    | -2.3  |
| Isobutene                | -4.0 <sup>b</sup>  | -4.3  | -8.2    | -4.0  | -3.9  | -10.0   | -3.6  |
| 1,2-Butadiene            | 38.8 <sup>b</sup>  | 38.1  | 35.2    | 38.1  | 37.6  | 33.0    | 38.0  |
| 1,3-s-tr-Butadiene       | 26.3 <sup>b</sup>  | 29.4  | 26.3    | 29.3  | 30.3  | 25.5    | 29.8  |
| 1-Butyne                 | 39.5 <sup>b</sup>  | 39.5  | 36.5    | 39.3  | 39.2  | 34.6    | 39.5  |
| 2-Butyne                 | 34.8 <sup>b</sup>  | 35.1  | 32.4    | 34.5  | 33.8  | 29.6    | 34.1  |
| Vinylacetylene           | 73.0 <sup>c</sup>  | 71.2  | 69.0    | 70.7  | 71.2  | 67.6    | 70.9  |
| Butatriene               | 83.0 <sup>c</sup>  | 81.9  | 79.8    | 81.1  | 80.7  | 77.3    | 80.8  |
| n-Pentane                | -35.1 <sup>b</sup> | -34.7 | -40.8   | -34.7 | -35.2 | -44.6   | -34.9 |
| Neopentane               | -40.2 <sup>b</sup> | -39.6 | -46.4   | -40.2 | -37.6 | -48.1   | -38.2 |
| n-Hexane                 | -39.9 <sup>b</sup> | -39.2 | -46.9   | -39.4 | -40.0 | -51.6   | -39.9 |
| tr-1,3-Pentadiene        | 18.2 <sup>b</sup>  | 20.5  | 16.1    | 20.4  | 20.9  | 14.0    | 20.4  |
| cis-1,3-Pentadiene       | 19.5 <sup>b</sup>  | 22.4  | 17.8    | 22.1  | 22.8  | 15.6    | 22.1  |
| 1,4-Pentadiene           | 25.2 <sup>b</sup>  | 26.9  | 22.4    | 25.1  | 26.8  | 19.7    | 24.5  |
| Cyclopropane             | 12.7 <sup>b</sup>  | 9.9   | 7.6     | 10.7  | 10.1  | 6.3     | 11.9  |
| cis-Dimethylcyclopropane | 1.3 <sup>d</sup>   | 0.6   | -5.0    | 1.1   | 0.1   | -8.4    | 1.1   |
| Cyclopropene             | 66.2 <sup>b</sup>  | 67.4  | 65.7    | 66.9  | 65.5  | 62.8    | 65.6  |
| 1-Methylcyclopropene     | 58.2 <sup>b</sup>  | 59.6  | 56.7    | 59.7  | 57.1  | 52.6    | 57.7  |
| 1,2-Dimethylcyclopropene | 46.4 <sup>d</sup>  | 51.8  | 47.7    | 52.5  | 48.9  | 42.5    | 49.9  |
| Methylenecyclopropane    | 47.9 <sup>b</sup>  | 45.0  | 42.0    | 45.4  | 43.7  | 39.1    | 44.7  |
| Cyclobutane              | 6.8 <sup>b</sup>   | 3.0   | -1.0    | 2.4   | 2.9   | -3.3    | 3.3   |
| Cyclobutene plan         | 37.5 <sup>b</sup>  | 41.3  | 38.2    | 40.2  | 40.8  | 35.8    | 40.0  |
| 1,2-Dimethylcyclobutene  | 19.8 <sup>d</sup>  | 21.4  | 15.3    | 21.3  | 20.9  | 11.7    | 21.2  |
| Methylenecyclobutane     | 29.0 <sup>b</sup>  | 25.4  | 20.8    | 24.9  | 25.6  | 18.3    | 25.5  |
| Cyclopentane envelope    | -18.3 <sup>b</sup> | -19.7 | -25.5   | -19.9 | -20.8 | -29.8   | -20.3 |
| Cyclopentene             | 8.1 <sup>b</sup>   | 6.8   | 1.9     | 7.0   | 5.7   | -2.0    | 6.0   |
| Cyclopentadiene          | 32.1 <sup>b</sup>  | 33.3  | 29.3    | 33.5  | 32.6  | 26.2    | 32.2  |
| Cyclohexane chair (AMP)  | -29.5 <sup>b</sup> | -27.1 | -35.0   | -27.2 | -28.5 | -40.5   | -28.5 |
| Cyclohexene half-chair   | -1.2 <sup>b</sup>  | 0.4   | -6.4    | 0.6   | -1.1  | -11.6   | -0.9  |
| 1,3-Cyclohexadiene       | 25.4 <sup>b</sup>  | 25.9  | 20.0    | 26.5  | 24.8  | 15.6    | 24.9  |
| Benzene                  | 19.7 <sup>b</sup>  | 18.8  | 13.8    | 19.7  | 18.5  | 10.6    | 18.9  |
| Toluene ecl              | 12.0 <sup>b</sup>  | 9.5   | 2.9     | 9.7   | 9.6   | -0.6    | 9.9   |
| Ethylbenzene stag        | 7.1 <sup>b</sup>   | 4.8   | -3.5    | 5.4   | 5.0   | -7.7    | 5.1   |
| Styrene                  | 35.3 <sup>b</sup>  | 34.7  | 27.3    | 35.4  | 35.6  | 24.1    | 35.4  |
| Cycloheptatriene         | 43.2 <sup>b</sup>  | 46.7  | 39.8    | 46.7  | 46.1  | 35.4    | 45.8  |
| Bicyclobutane            | 51.9 <sup>b</sup>  | 62.0  | 59.0    | 61.7  | 59.9  | 55.2    | 61.4  |
| Spirocyclopentane        | 44.3 <sup>b</sup>  | 42.8  | 38.4    | 43.6  | 41.0  | 34.3    | 42.7  |
| trans-Bicyclopropyl      | 30.9 <sup>b</sup>  | 30.7  | 24.7    | 30.9  | 30.2  | 21.0    | 31.9  |
| Bicyclo[2.1.0]pentane    | 37.8 <sup>c</sup>  | 40.1  | 35.4    | 39.5  | 39.0  | 31.6    | 39.3  |
| Norbornane               | -13.1 <sup>b</sup> | -12.5 | -21.5   | -13.3 | -12.4 | -26.3   | -13.2 |
| Norbornadiene            | 58.8 <sup>b</sup>  | 51.8  | 44.8    | 51.4  | 52.0  | 41.1    | 50.6  |
| Bicyclo[2.2.2]octane     | -23.7 <sup>b</sup> | -22.2 | -33.6   | -22.8 | -23.4 | -40.5   | -23.9 |

... continued on next page ...

Table S6: ... continued from previous page ...

| Species               | Ref.               | OM2   | OM2-D3T | ODM2  | OM3   | OM3-D3T | ODM3  |
|-----------------------|--------------------|-------|---------|-------|-------|---------|-------|
| Naphthalene           | 35.9 <sup>b</sup>  | 34.8  | 25.3    | 35.8  | 35.7  | 21.0    | 35.7  |
| Adamantane            | -32.2 <sup>b</sup> | -30.4 | -45.6   | -31.5 | -30.2 | -53.1   | -32.0 |
| Cubane                | 148.7 <sup>b</sup> | 144.6 | 137.2   | 141.2 | 146.4 | 134.8   | 144.1 |
| Nitrogen              | 0.0 <sup>a</sup>   | 2.8   | 2.6     | 1.5   | 2.6   | 2.2     | 4.6   |
| Ammonia               | -11.0 <sup>b</sup> | -5.9  | -6.3    | -12.0 | -11.2 | -12.0   | -11.3 |
| Methylamine           | -5.5 <sup>b</sup>  | -4.1  | -5.6    | -6.3  | -5.8  | -8.1    | -5.6  |
| Dimethylamine         | -4.4 <sup>b</sup>  | -5.1  | -7.9    | -4.2  | -2.2  | -6.5    | -3.2  |
| Trimethylamine        | -5.7 <sup>b</sup>  | -8.0  | -12.4   | -4.5  | -0.1  | -6.7    | -2.9  |
| Ethylamine            | -11.3 <sup>b</sup> | -8.9  | -11.7   | -10.9 | -12.1 | -16.5   | -11.9 |
| n-Propylamine         | -16.8 <sup>b</sup> | -13.5 | -17.8   | -15.6 | -16.9 | -23.5   | -16.8 |
| Isopropylamine        | -20.0 <sup>b</sup> | -14.5 | -18.9   | -19.4 | -17.4 | -24.2   | -18.3 |
| tert-Butylamine       | -28.9 <sup>b</sup> | -22.3 | -28.7   | -27.4 | -24.6 | -34.3   | -25.6 |
| Aziridine             | 30.2 <sup>b</sup>  | 36.3  | 34.3    | 36.0  | 35.4  | 32.3    | 38.0  |
| Pyrrole               | 25.9 <sup>b</sup>  | 33.7  | 30.2    | 35.6  | 32.0  | 26.3    | 33.9  |
| Pyridine              | 33.6 <sup>b</sup>  | 30.8  | 26.3    | 33.5  | 29.4  | 22.3    | 31.8  |
| Pyridazine (1,2)      | 66.5 <sup>b</sup>  | 48.4  | 44.3    | 55.3  | 51.1  | 44.6    | 56.0  |
| Pyrimidine (1,3)      | 46.8 <sup>b</sup>  | 44.5  | 40.4    | 48.0  | 41.9  | 35.4    | 43.8  |
| Pyrazine (1,4)        | 46.9 <sup>b</sup>  | 44.9  | 40.9    | 50.0  | 42.0  | 35.5    | 47.8  |
| Aniline               | 20.8 <sup>b</sup>  | 25.2  | 19.0    | 22.0  | 22.3  | 12.7    | 22.0  |
| Hydrogen cyanide      | 32.3 <sup>e</sup>  | 26.1  | 25.7    | 25.5  | 25.3  | 24.7    | 25.4  |
| Acetonitrile          | 18.0 <sup>c</sup>  | 17.5  | 16.2    | 17.3  | 15.3  | 13.2    | 15.3  |
| Methylisocyanide      | 39.1 <sup>b</sup>  | 38.3  | 36.9    | 37.6  | 26.7  | 24.4    | 21.8  |
| Propionitrile         | 12.3 <sup>b</sup>  | 12.3  | 9.6     | 12.1  | 10.2  | 6.0     | 10.5  |
| Acrylonitrile         | 43.2 <sup>b</sup>  | 45.6  | 43.6    | 45.3  | 43.7  | 40.5    | 43.6  |
| Fumaronitrile         | 81.0 <sup>b</sup>  | 79.7  | 76.9    | 79.7  | 75.2  | 70.8    | 75.8  |
| Maleonitrile          | 81.3 <sup>b</sup>  | 81.2  | 78.2    | 81.4  | 76.2  | 71.6    | 77.0  |
| Dicyanoacetylene      | 126.5 <sup>b</sup> | 138.0 | 136.1   | 137.6 | 128.3 | 125.3   | 130.0 |
| Cyanogen              | 73.3 <sup>b</sup>  | 74.8  | 73.9    | 76.2  | 68.2  | 66.7    | 70.5  |
| Benzonitrile          | 51.6 <sup>b</sup>  | 49.7  | 43.7    | 50.1  | 48.0  | 38.6    | 48.3  |
| Hydrazine             | 22.8 <sup>e</sup>  | 18.5  | 17.4    | 17.6  | 16.5  | 14.7    | 17.2  |
| Methylhydrazine       | 22.6 <sup>b</sup>  | 18.2  | 15.8    | 18.7  | 20.1  | 16.5    | 20.1  |
| 1,1-Dimethylhydrazine | 20.1 <sup>b</sup>  | 14.8  | 10.8    | 17.8  | 21.4  | 15.4    | 19.6  |
| 1,2-Dimethylhydrazine | 22.0 <sup>b</sup>  | 17.1  | 13.2    | 20.6  | 22.8  | 16.9    | 22.0  |
| trans-Azodiisopropane | 8.6 <sup>b</sup>   | 4.5   | -4.5    | 0.6   | 5.8   | -7.7    | 6.5   |
| Hydrogen azide        | 70.3 <sup>c</sup>  | 72.6  | 71.8    | 72.8  | 69.2  | 67.9    | 69.6  |
| Oxygen Triplet        | 0.0 <sup>a</sup>   | 2.0   | 1.9     | 3.9   | -2.6  | -2.8    | 0.4   |
| Ozone                 | 34.0 <sup>c</sup>  | 37.9  | 37.5    | 39.7  | 48.7  | 48.1    | 52.8  |
| Water                 | -57.8 <sup>b</sup> | -56.5 | -56.7   | -58.9 | -58.5 | -58.8   | -58.0 |
| Methanol              | -48.2 <sup>b</sup> | -49.3 | -50.3   | -50.1 | -49.8 | -51.4   | -49.7 |
| Ethanol               | -56.2 <sup>b</sup> | -56.9 | -59.1   | -56.7 | -57.2 | -60.8   | -56.6 |
| Propanol              | -61.0 <sup>b</sup> | -61.9 | -65.6   | -61.9 | -62.2 | -67.9   | -61.6 |
| Isopropanol           | -65.2 <sup>b</sup> | -66.7 | -70.5   | -68.7 | -67.2 | -73.1   | -67.5 |
| tert-Butanol          | -74.7 <sup>b</sup> | -76.8 | -82.4   | -78.1 | -75.9 | -84.5   | -76.1 |
| Dimethylether         | -44.0 <sup>b</sup> | -45.6 | -47.7   | -45.9 | -42.8 | -46.2   | -44.3 |
| Diethylether          | -60.3 <sup>b</sup> | -61.1 | -65.9   | -60.2 | -58.4 | -65.7   | -59.4 |
| Oxirane               | -12.6 <sup>b</sup> | -13.3 | -14.8   | -10.1 | -8.8  | -11.2   | -5.1  |
| Furan                 | -8.3 <sup>b</sup>  | -2.9  | -5.9    | -3.4  | -2.7  | -7.4    | -2.2  |
| Phenol                | -23.0 <sup>b</sup> | -21.7 | -27.2   | -22.4 | -23.6 | -32.3   | -23.2 |
| Anisole plan          | -16.2 <sup>b</sup> | -16.0 | -23.0   | -16.3 | -14.1 | -25.0   | -15.4 |
| Hydrogen peroxide     | -32.5 <sup>e</sup> | -35.3 | -35.8   | -34.8 | -36.9 | -37.6   | -36.1 |
| Dimethylperoxide      | -30.0 <sup>b</sup> | -33.6 | -36.0   | -33.0 | -29.0 | -32.7   | -30.4 |
| Diethylperoxide       | -46.1 <sup>b</sup> | -52.6 | -57.8   | -49.5 | -46.0 | -53.8   | -46.1 |
| Carbon monoxide       | -26.4 <sup>b</sup> | -20.3 | -20.5   | -19.3 | -21.5 | -21.8   | -17.5 |
| Carbon dioxide        | -94.1 <sup>b</sup> | -80.5 | -80.9   | -81.8 | -87.7 | -88.4   | -89.4 |
| Carbon suboxide       | -22.0 <sup>c</sup> | -3.2  | -4.4    | -6.5  | -16.9 | -18.9   | -16.2 |
| Formaldehyde          | -26.0 <sup>b</sup> | -30.3 | -30.9   | -30.0 | -31.9 | -32.8   | -32.3 |
| Acetaldehyde free     | -39.7 <sup>b</sup> | -44.2 | -45.8   | -44.1 | -46.5 | -49.1   | -46.7 |
| Propionaldehyde ecl   | -44.4 <sup>b</sup> | -48.2 | -51.3   | -48.7 | -50.5 | -55.3   | -50.5 |
| Acetone ecl           | -51.9 <sup>b</sup> | -57.4 | -60.4   | -57.8 | -59.3 | -63.9   | -59.3 |
| Ketene                | -11.4 <sup>b</sup> | -5.1  | -6.1    | -6.5  | -11.0 | -12.6   | -10.9 |
| Acrolein free         | -18.0 <sup>c</sup> | -18.1 | -20.3   | -18.1 | -19.1 | -22.7   | -19.8 |
| Glyoxal               | -50.7 <sup>b</sup> | -59.1 | -60.6   | -58.5 | -62.6 | -65.0   | -63.1 |
| Biacetyl              | -78.2 <sup>b</sup> | -89.2 | -93.4   | -88.5 | -91.6 | -98.2   | -90.5 |

... continued on next page ...

Table S6: ... continued from previous page ...

| Species                | Ref.                | OM2    | OM2-D3T | ODM2   | OM3    | OM3-D3T | ODM3   |
|------------------------|---------------------|--------|---------|--------|--------|---------|--------|
| Acetylacetone          | -91.0 <sup>b</sup>  | -99.2  | -105.2  | -99.8  | -101.8 | -111.0  | -101.6 |
| p-Quinone              | -29.4 <sup>b</sup>  | -32.5  | -37.9   | -31.6  | -32.9  | -41.3   | -32.0  |
| Benzaldehyde           | -8.8 <sup>b</sup>   | -14.5  | -20.9   | -13.6  | -15.6  | -25.6   | -15.7  |
| Formic acid (Z)        | -90.5 <sup>b</sup>  | -86.9  | -87.8   | -88.0  | -88.2  | -89.7   | -89.6  |
| Acetic acid stag (Z)   | -103.4 <sup>b</sup> | -101.0 | -103.0  | -102.2 | -102.7 | -106.0  | -103.8 |
| Propionic acid C-ecl   | -108.4 <sup>b</sup> | -106.3 | -109.8  | -107.6 | -107.5 | -112.9  | -108.4 |
| Oxalic acid 4-ring     | -173.0 <sup>b</sup> | -165.0 | -167.3  | -166.7 | -166.4 | -170.2  | -168.1 |
| Benzoic acid           | -70.3 <sup>b</sup>  | -71.1  | -78.0   | -71.2  | -71.0  | -81.8   | -71.3  |
| Methyl formiate (Z)    | -85.0 <sup>b</sup>  | -81.4  | -83.5   | -82.1  | -79.4  | -82.6   | -82.1  |
| Methyl acetate ecl (Z) | -98.5 <sup>b</sup>  | -95.6  | -98.8   | -96.7  | -93.8  | -99.0   | -96.7  |
| Acetic anhydride ecl   | -136.8 <sup>b</sup> | -139.5 | -143.9  | -139.7 | -138.8 | -145.7  | -142.3 |
| Maleic anhydride       | -95.2 <sup>b</sup>  | -87.1  | -90.4   | -87.4  | -87.2  | -92.5   | -90.4  |
| Formamide              | -44.0 <sup>c</sup>  | -39.8  | -41.1   | -43.2  | -46.3  | -48.4   | -48.5  |
| Dimethylformamide      | -45.8 <sup>b</sup>  | -43.5  | -47.6   | -39.4  | -41.4  | -47.7   | -45.5  |
| Nitrous oxide          | 19.6 <sup>e</sup>   | 21.2   | 20.8    | 19.5   | 20.7   | 19.9    | 20.9   |
| Dinitrotetroxide free  | 2.2 <sup>b</sup>    | 13.2   | 11.5    | 8.7    | 9.5    | 6.7     | 4.6    |
| Nitrous acid trans     | -18.3 <sup>e</sup>  | -19.7  | -20.3   | -19.9  | -26.8  | -27.8   | -25.8  |
| Nitric acid            | -32.1 <sup>e</sup>  | -33.6  | -34.6   | -35.9  | -33.4  | -35.1   | -33.4  |
| Methylnitrite          | -15.9 <sup>b</sup>  | -16.8  | -18.4   | -17.4  | -20.0  | -22.6   | -20.3  |
| Nitromethane           | -17.8 <sup>b</sup>  | -17.3  | -19.1   | -17.0  | -15.7  | -18.5   | -13.5  |

a G.Pilcher and H.A.Skinner, in "The Chemistry of the Metal-Carbon Bond", edited by F.R.Hartley and S.Patai, Wiley, New York, 1982, pp. 43-90. b J.B.Pedley, R.D.Naylor, and S.P.Kirby, "Thermochemical Data of Organic Compounds", 2nd ed., Chapman and Hall, London, 1986. c S.G.Lias, J.E.Bartmess, J.F.Liebman, J.L.Holmes, R.D.Levin, and W.G.Mallard, "Gas Phase Ion and Neutral Thermochemistry", J.Phys.Chem.Ref.Data 17, Suppl. 1 (1988). d R.B. Turner, P. Goebel, B.J. Mallon, W. von E. Doering, J.F. Coburn Jr., and M. Pomerantz, J.Am.Chem.Soc. 90, 4315 (1968). See c in Table II, DT paper. e M.W.Chase, C.A.Davies, J.R.Downey, D.R.Frurip, R.A.McDonald, and A.N.Syverud, "JANAF Thermochemical Tables", 3rd edition, J.Phys.Chem.Ref.Data 14, Suppl.1 (1985).

Table S7: Benchmark Results for the CHNO Set. Ionization Potentials (eV)

| Species             | Ref.               | OM2   | OM2-D3T | ODM2  | OM3   | OM3-D3T | ODM3  |
|---------------------|--------------------|-------|---------|-------|-------|---------|-------|
| Hydrogen            | 15.98 <sup>a</sup> | 15.68 | 15.68   | 15.64 | 15.65 | 15.65   | 15.67 |
| Methane             | 14.00 <sup>a</sup> | 13.64 | 13.64   | 13.66 | 14.17 | 14.17   | 14.30 |
| Ethane              | 12.10 <sup>b</sup> | 11.92 | 11.92   | 11.93 | 12.30 | 12.30   | 12.43 |
| Ethylene            | 10.51 <sup>a</sup> | 10.74 | 10.74   | 10.53 | 11.05 | 11.05   | 10.87 |
| Acetylene           | 11.40 <sup>a</sup> | 11.55 | 11.55   | 11.35 | 11.79 | 11.79   | 11.64 |
| Propane             | 11.50 <sup>a</sup> | 11.39 | 11.39   | 11.36 | 11.69 | 11.69   | 11.82 |
| Propene ecl         | 9.88 <sup>b</sup>  | 9.99  | 9.99    | 9.81  | 10.28 | 10.29   | 10.16 |
| Propyne             | 10.37 <sup>a</sup> | 10.64 | 10.64   | 10.47 | 10.88 | 10.88   | 10.78 |
| Allene              | 10.07 <sup>c</sup> | 10.16 | 10.16   | 9.97  | 10.44 | 10.45   | 10.31 |
| Isobutane           | 11.40 <sup>a</sup> | 11.06 | 11.07   | 10.96 | 11.41 | 11.41   | 11.53 |
| 1,3-s-tr-Butadiene  | 9.08 <sup>a</sup>  | 9.32  | 9.32    | 9.10  | 9.61  | 9.61    | 9.43  |
| Diacetylene         | 10.17 <sup>a</sup> | 10.30 | 10.30   | 10.06 | 10.47 | 10.47   | 10.29 |
| Butatriene          | 9.15 <sup>d</sup>  | 9.35  | 9.35    | 9.11  | 9.60  | 9.60    | 9.39  |
| Neopentane          | 11.30 <sup>a</sup> | 10.82 | 10.82   | 10.70 | 11.31 | 11.31   | 11.31 |
| Cyclopropane        | 11.00 <sup>b</sup> | 10.88 | 10.88   | 10.71 | 11.47 | 11.47   | 11.38 |
| Cyclopropene        | 9.86 <sup>a</sup>  | 9.84  | 9.84    | 9.70  | 10.13 | 10.13   | 10.06 |
| Cyclobutane         | 11.00 <sup>c</sup> | 10.38 | 10.38   | 10.24 | 10.98 | 10.98   | 10.97 |
| Cyclobutene plan    | 9.43 <sup>a</sup>  | 9.65  | 9.64    | 9.49  | 9.93  | 9.93    | 9.82  |
| Cyclopentene        | 9.18 <sup>a</sup>  | 9.22  | 9.22    | 9.09  | 9.51  | 9.51    | 9.44  |
| Cyclopentadiene     | 8.57 <sup>a</sup>  | 8.82  | 8.82    | 8.63  | 9.10  | 9.10    | 8.97  |
| Benzene             | 9.24 <sup>a</sup>  | 9.59  | 9.59    | 9.41  | 9.91  | 9.91    | 9.76  |
| Toluene ecl         | 8.82 <sup>b</sup>  | 9.17  | 9.17    | 9.00  | 9.46  | 9.46    | 9.35  |
| Naphthalene         | 8.15 <sup>a</sup>  | 8.51  | 8.51    | 8.31  | 8.79  | 8.79    | 8.63  |
| Nitrogen            | 15.60 <sup>b</sup> | 15.46 | 15.46   | 15.55 | 14.51 | 14.51   | 14.73 |
| Ammonia             | 10.85 <sup>b</sup> | 10.67 | 10.67   | 10.84 | 11.23 | 11.23   | 11.30 |
| Methylamine         | 9.45 <sup>c</sup>  | 9.75  | 9.75    | 9.91  | 10.00 | 10.01   | 10.13 |
| Dimethylamine       | 8.93 <sup>c</sup>  | 9.23  | 9.23    | 9.41  | 9.24  | 9.25    | 9.38  |
| Trimethylamine      | 8.54 <sup>c</sup>  | 8.84  | 8.85    | 9.07  | 8.67  | 8.69    | 8.87  |
| Aziridine           | 9.80 <sup>b</sup>  | 10.13 | 10.13   | 10.19 | 10.39 | 10.39   | 10.41 |
| Pyrrrole            | 8.21 <sup>d</sup>  | 8.46  | 8.47    | 8.27  | 8.65  | 8.65    | 8.49  |
| Pyridine            | 9.67 <sup>e</sup>  | 9.96  | 9.96    | 9.78  | 10.13 | 10.13   | 10.08 |
| Hydrogen cyanide    | 13.60 <sup>b</sup> | 13.91 | 13.91   | 13.89 | 13.94 | 13.94   | 13.86 |
| Acetonitrile        | 12.21 <sup>d</sup> | 12.50 | 12.50   | 12.52 | 12.63 | 12.63   | 12.67 |
| Acrylonitrile       | 10.91 <sup>d</sup> | 10.88 | 10.88   | 10.80 | 11.09 | 11.09   | 11.06 |
| Cyanoacetylene      | 11.60 <sup>c</sup> | 11.58 | 11.58   | 11.49 | 11.67 | 11.67   | 11.65 |
| Cyanogen            | 13.36 <sup>d</sup> | 13.27 | 13.27   | 13.36 | 13.22 | 13.22   | 13.33 |
| Ozone               | 12.75 <sup>c</sup> | 12.85 | 12.85   | 12.80 | 13.27 | 13.27   | 13.10 |
| Water               | 12.62 <sup>b</sup> | 12.91 | 12.91   | 12.88 | 13.12 | 13.12   | 13.05 |
| Methanol            | 10.96 <sup>a</sup> | 11.22 | 11.22   | 11.17 | 11.60 | 11.60   | 11.66 |
| Dimethylether       | 10.04 <sup>a</sup> | 10.51 | 10.51   | 10.43 | 10.94 | 10.94   | 11.03 |
| Oxirane             | 10.57 <sup>a</sup> | 11.31 | 11.31   | 11.21 | 11.79 | 11.79   | 11.84 |
| Furan               | 8.88 <sup>a</sup>  | 9.03  | 9.03    | 8.83  | 9.45  | 9.45    | 9.30  |
| Carbon monoxide     | 14.01 <sup>a</sup> | 13.60 | 13.60   | 13.36 | 13.68 | 13.68   | 13.42 |
| Carbon dioxide      | 13.78 <sup>a</sup> | 13.27 | 13.27   | 13.21 | 13.57 | 13.57   | 13.47 |
| Formaldehyde        | 10.88 <sup>b</sup> | 11.03 | 11.03   | 10.91 | 11.26 | 11.26   | 11.25 |
| Acetaldehyde free   | 10.21 <sup>a</sup> | 10.62 | 10.62   | 10.51 | 10.94 | 10.94   | 10.91 |
| Acetone ecl         | 9.72 <sup>a</sup>  | 10.31 | 10.31   | 10.19 | 10.67 | 10.67   | 10.58 |
| Ketene              | 9.64 <sup>a</sup>  | 9.75  | 9.75    | 9.59  | 9.97  | 9.97    | 9.82  |
| Acrolein free       | 10.11 <sup>b</sup> | 10.59 | 10.59   | 10.47 | 10.87 | 10.87   | 10.83 |
| trans-Glyoxal       | 10.59 <sup>a</sup> | 10.57 | 10.57   | 10.50 | 10.77 | 10.77   | 10.74 |
| Formic acid (Z)     | 11.51 <sup>a</sup> | 11.72 | 11.72   | 11.65 | 12.12 | 12.12   | 12.09 |
| Methyl formiate (Z) | 11.02 <sup>a</sup> | 11.24 | 11.24   | 11.18 | 11.70 | 11.70   | 11.72 |

a J.W.Robinson (ed.), "Handbook of Spectroscopy", Vol.1, CRC Press, Baton Rouge, 1980. b D.W.Turner, C.Baker, A.D.Baker, and C.R.Brundle, "Molecular Photoelectron Spectroscopy", Wiley-Interscience, London, 1970. c Taken from the experimental data quoted in: M.J.S. Dewar, W.Thiel, J.Am.Chem.Soc. 99, 4907 (1977). d S.G.Lias, J.E.Bartmess, J.F.Liebman, J.L.Holmes, R.D.Levin, and W.G.Mallard, "Gas Phase Ion and Neutral Thermochemistry", J.Phys.Chem.Ref.Data 17, Suppl. 1 (1988). e From experimental data of dubious accuracy quoted in: J.J.P.Stewart, J.Comput.Chem. 10, 221 (1991). Original source: G.Dittmer and U.Niemann, Philips J.Res. 37, 1 (1982).



Table S8: Benchmark Results for the CHNO Set. Enthalpy Changes at 298 K (kcal/mol)

| Species            | Ref.              | OM2  | OM2-D3T | ODM2 | OM3  | OM3-D3T | ODM3 |
|--------------------|-------------------|------|---------|------|------|---------|------|
| Isobutane          | -2.1 <sup>a</sup> | -1.7 | -1.9    | -1.9 | -1.0 | -1.3    | -1.3 |
| trans-2-Butene     | -2.7 <sup>a</sup> | -3.9 | -3.7    | -3.8 | -4.3 | -4.1    | -4.2 |
| cis-2-Butene       | -1.7 <sup>a</sup> | -2.0 | -2.0    | -2.1 | -2.5 | -2.6    | -2.6 |
| cis-2-Butene       | 1.0 <sup>a</sup>  | 1.8  | 1.7     | 1.7  | 1.8  | 1.5     | 1.6  |
| Isobutene          | -4.0 <sup>a</sup> | -4.4 | -4.5    | -4.1 | -4.2 | -4.4    | -3.9 |
| 2-Butyne           | -4.7 <sup>a</sup> | -4.4 | -4.1    | -4.8 | -5.4 | -4.9    | -5.5 |
| 2-Methylbutane     | -1.6 <sup>a</sup> | -1.2 | -1.6    | -1.4 | -0.3 | -0.9    | -0.7 |
| Neopentane         | -5.1 <sup>a</sup> | -4.9 | -5.6    | -5.5 | -2.5 | -3.5    | -3.4 |
| cis-1,3-Pentadiene | 1.3 <sup>a</sup>  | 1.9  | 1.7     | 1.7  | 1.9  | 1.6     | 1.7  |
| Isopropylamine     | -3.2 <sup>a</sup> | -1.0 | -1.1    | -3.8 | -0.6 | -0.7    | -1.5 |
| Methylisocyanide   | 21.1 <sup>a</sup> | 20.8 | 20.7    | 20.2 | 11.4 | 11.2    | 6.4  |
| cis-Diimine        | 5.2 <sup>b</sup>  | -4.6 | -4.6    | -4.0 | 0.7  | 0.6     | -2.7 |
| Oxygen Singlet     | 22.5 <sup>c</sup> | 18.3 | 18.3    | 18.3 | 19.0 | 19.0    | 19.0 |
| Isopropanol        | -4.2 <sup>a</sup> | -4.7 | -4.9    | -6.8 | -5.0 | -5.3    | -5.9 |
| Acetylaceton Enol  | -4.0              | 5.2  | 5.5     | 3.6  | 4.6  | 5.0     | 4.9  |
| Acetylaceton (TS)  | 6.9               | 5.8  | 6.1     | 3.1  | 4.6  | 5.0     | 4.9  |
| Nitromethane       | -1.9 <sup>a</sup> | -0.6 | -0.7    | 0.4  | 4.3  | 4.1     | 6.8  |

a J.B.Pedley, R.D.Naylor, and S.P.Kirby, "Thermochemical Data of Organic Compounds", 2nd ed., Chapman and Hall, London, 1986. b J.M.L.Martin and P.R.Taylor, Mol.Phys. 96, 681 (1999). c M.W.Chase, C.A.Davies, J.R.Downey, D.R.Frurip, R.A.McDonald, and A.N.Syverud, "JANAF Thermochemical Tables", 3rd edition, J.Phys.Chem.Ref.Data 14, Suppl.1 (1985).

Table S9: Benchmark Results for the CHNO Set. Activation Enthalpies (kcal/mol)

| Species                         | Ref.              | OM2  | OM2-D3T | ODM2 | OM3  | OM3-D3T | ODM3 |
|---------------------------------|-------------------|------|---------|------|------|---------|------|
| Ethane ecl                      | 2.9 <sup>a</sup>  | 2.8  | 2.8     | 2.3  | 2.4  | 2.5     | 2.0  |
| Ethylene ort                    | 65.0 <sup>b</sup> | 57.4 | 57.4    | 55.4 | 55.9 | 56.0    | 52.3 |
| Propene stag                    | 2.0 <sup>b</sup>  | 0.8  | 0.8     | 0.1  | 0.7  | 0.7     | 0.0  |
| n-Butane cis-Barrier            | 6.0 <sup>c</sup>  | 5.1  | 4.9     | 5.0  | 5.0  | 4.7     | 5.0  |
| But-1-ene C-ecl                 | 0.4 <sup>c</sup>  | 1.4  | 1.2     | 1.6  | 1.2  | 1.0     | 1.6  |
| 1,3-s-cis-Butadiene             | 3.8 <sup>b</sup>  | 1.1  | 1.0     | 0.8  | 1.0  | 0.8     | 0.6  |
| 1,3-gauche-Butadiene            | 2.9 <sup>b</sup>  | 0.9  | 0.8     | 1.1  | 0.8  | 0.6     | 1.0  |
| 1,3-Butadiene ort               | 6.0 <sup>b</sup>  | 2.1  | 2.0     | 1.4  | 1.7  | 1.7     | 1.0  |
| Cyclobutane plan                | 1.4 <sup>a</sup>  | 0.0  | 0.0     | 0.0  | 0.0  | 0.0     | 0.0  |
| Methylenecyclobutane plan       | 0.4 <sup>d</sup>  | 0.0  | 0.0     | 0.0  | 0.0  | 0.0     | -0.0 |
| Cyclopentane planar             | 4.8 <sup>c</sup>  | 2.6  | 2.7     | 2.8  | 1.9  | 2.0     | 2.3  |
| Cyclopentene plan               | 0.7 <sup>e</sup>  | 0.0  | 0.1     | -0.4 | 0.0  | 0.0     | -0.5 |
| Cyclohexane twist (AMP)         | 4.8 <sup>c</sup>  | 5.2  | 5.2     | 5.7  | 5.0  | 5.0     | 5.7  |
| Cyclohexene plan                | 13.4 <sup>f</sup> | 11.9 | 12.1    | 12.0 | 9.8  | 10.2    | 10.4 |
| Cyclohexadiene plan             | 3.2 <sup>g</sup>  | 2.0  | 2.1     | 1.9  | 1.3  | 1.4     | 1.3  |
| Toluene stag                    | 0.1 <sup>c</sup>  | -0.0 | -0.0    | 0.6  | 0.0  | 0.0     | -0.6 |
| Styrene plan                    | 0.0 <sup>b</sup>  | 0.2  | 0.2     | -0.3 | 0.1  | 0.1     | -0.4 |
| Styrene ort                     | 3.1 <sup>b</sup>  | 0.8  | 0.9     | 0.7  | 0.7  | 0.9     | 0.6  |
| Ammonia planar                  | 5.8 <sup>h</sup>  | 3.5  | 3.5     | 1.9  | 6.7  | 6.7     | 6.4  |
| Methylamine ecl (TS rot)        | 2.0 <sup>i</sup>  | 2.2  | 2.2     | 1.4  | 2.3  | 2.3     | 1.4  |
| Methylamine planar (TS inv)     | 4.8 <sup>h</sup>  | 3.6  | 3.6     | 2.3  | 4.2  | 4.2     | 3.3  |
| Dimethylamine planar            | 4.4 <sup>h</sup>  | 3.5  | 3.5     | 2.7  | 2.8  | 2.8     | 1.8  |
| Trimethylamine planar (C3h inv) | 6.0 <sup>h</sup>  | 4.2  | 4.3     | 2.9  | 2.6  | 2.7     | 1.0  |
| Trimethylamine (C3 inv)         | 6.0 <sup>h</sup>  | 4.1  | 4.3     | 2.9  | 0.0  | 2.7     | 1.0  |
| Aziridine planar (inv)          | 11.6 <sup>h</sup> | 13.4 | 13.4    | 11.8 | 11.5 | 11.5    | 9.0  |
| Aniline planar                  | 1.5 <sup>b</sup>  | 0.5  | 0.6     | -0.4 | 0.6  | 0.7     | -0.1 |
| Hydrazine trans                 | 2.5 <sup>j</sup>  | 8.0  | 8.0     | 5.8  | 1.8  | 1.8     | -0.6 |
| Hydrazine cis                   | 8.3 <sup>j</sup>  | 10.8 | 10.8    | 8.5  | 8.7  | 8.7     | 4.6  |
| Methanol ecl                    | 1.1 <sup>i</sup>  | 1.8  | 1.8     | 1.2  | 1.6  | 1.6     | 0.9  |
| Phenol plan                     | 0.0 <sup>k</sup>  | 0.0  | 0.0     | -0.0 | 0.0  | 0.0     | 0.0  |
| Phenol ort                      | 3.5 <sup>b</sup>  | 1.4  | 1.4     | 0.6  | 2.0  | 2.0     | 1.1  |
| Anisole ort                     | 3.0 <sup>l</sup>  | 0.1  | 0.1     | -0.1 | 0.5  | 0.5     | 0.2  |
| Hydrogen peroxide cis           | 7.0 <sup>i</sup>  | 8.5  | 8.5     | 8.4  | 10.5 | 10.5    | 10.1 |
| Hydrogen peroxide trans         | 1.1 <sup>i</sup>  | 2.5  | 2.5     | 0.4  | 1.1  | 1.1     | 0.2  |
| Diethylperoxide                 | 0.0 <sup>i</sup>  | 3.2  | 3.4     | 2.6  | 1.4  | 1.6     | 1.0  |
| Acetaldehyde ecl                | 0.0               | 0.0  | 0.0     | 0.0  | 0.0  | 0.0     | 0.0  |
| Acetaldehyde stag               | 1.1 <sup>c</sup>  | 0.2  | 0.2     | -0.3 | 0.3  | 0.3     | -0.3 |
| Propionaldehyde stag            | 1.5 <sup>c</sup>  | -0.8 | -0.8    | -0.8 | -0.7 | -0.6    | -1.5 |
| Acrolein s-trans                | 0.0               | 0.0  | 0.0     | 0.0  | 0.0  | 0.0     | -0.0 |
| Acrolein s-cis                  | 1.7 <sup>b</sup>  | 0.0  | -0.0    | 0.1  | -0.2 | -0.2    | 0.1  |
| Acrolein ort (TS rot)           | 4.7 <sup>m</sup>  | 2.6  | 2.6     | 2.1  | 2.0  | 2.0     | 1.5  |
| trans-Glyoxal                   | 0.0 <sup>k</sup>  | 0.0  | 0.0     | 0.0  | 0.8  | 0.8     | 0.5  |
| cis-Glyoxal                     | 4.8 <sup>m</sup>  | 3.8  | 3.8     | 3.5  | 2.9  | 2.9     | 2.8  |
| Glyoxal ort (TS)                | 5.9 <sup>n</sup>  | 3.8  | 3.8     | 3.5  | 2.9  | 2.9     | 2.8  |
| Biacetyl                        | 0.0 <sup>i</sup>  | 0.5  | 0.5     | -0.5 | 0.9  | 0.9     | 0.5  |
| Benzaldehyde ort                | 4.6 <sup>b</sup>  | 3.6  | 3.7     | 3.1  | 3.3  | 3.3     | 2.6  |
| Formic acid (E)                 | 3.9 <sup>o</sup>  | 6.1  | 6.1     | 7.9  | 6.2  | 6.2     | 6.5  |
| Formic acid ort (TS)            | 12.4 <sup>o</sup> | 10.5 | 10.5    | 10.9 | 11.3 | 11.3    | 10.2 |
| Acetic acid stag (E)            | 5.8 <sup>p</sup>  | 5.6  | 5.6     | 6.5  | 5.8  | 5.7     | 6.2  |
| Acetic acid stag ort (TS)       | 12.6 <sup>o</sup> | 10.1 | 10.1    | 9.4  | 10.9 | 10.8    | 9.6  |
| Benzoic acid plan               | 0.0 <sup>k</sup>  | 0.0  | 0.0     | 0.0  | 0.0  | 0.0     | 0.0  |
| Benzoic acid ort                | 5.0 <sup>q</sup>  | 4.0  | 4.1     | 3.4  | 3.5  | 3.6     | 2.7  |
| Methyl formiate (E)             | 4.8 <sup>o</sup>  | 4.0  | 4.1     | 5.0  | 4.1  | 4.2     | 4.3  |
| Methyl formiate (Z) ECL         | 1.2 <sup>o</sup>  | -0.0 | 0.0     | -0.5 | 0.1  | 0.2     | -0.2 |
| Methyl acetate ecl (E)          | 8.5 <sup>r</sup>  | 5.1  | 4.8     | 6.3  | 5.9  | 5.6     | 6.6  |
| Formamide plan                  | 0.0 <sup>r</sup>  | 0.0  | 0.0     | 0.0  | 0.0  | 0.0     | 0.0  |
| Formamide rot                   | 16.0 <sup>s</sup> | 13.7 | 13.7    | 12.6 | 14.9 | 14.9    | 12.6 |
| Formamide rot LP cis            | 18.7 <sup>t</sup> | 16.7 | 16.7    | 14.8 | 17.8 | 17.8    | 15.4 |
| Dinitrotetroxide plan           | 0.0 <sup>u</sup>  | 0.1  | 0.1     | 0.0  | 0.1  | 0.1     | -0.0 |
| Dinitrotetroxide ort            | 2.9 <sup>u</sup>  | -0.1 | -0.1    | -0.3 | -0.1 | -0.1    | -0.2 |

a Experimental data cited in: W.J. Hehre, L. Radom, P.v.R. Schleyer, and J.A. Pople, "Ab initio Molecular Orbital Theory", Wiley, New York, 1986. b Experimental conformational barriers cited in: M. Head-Gordon and J.A. Pople, J.Phys.Chem. 97, 1147 (1993) ; A.E. Dorigo, D.W. Pratt, and K.N. Houk, J.Am.Chem.Soc. 109, 6591 (1987). c Experimental data cited in: B.

Testa, "Grundlagen der Organischen Stereochemie", VCH, Weinheim, 1983. d M.E. Charro, J.C. Lopez, J.L. Alonso, G. Wlodarczyk, and J. Demaison, *J.Mol.Spectrosc.* 162, 67 (1993). e W.D. Allen, A.G. Csaszar, and D.A. Horner, *J.Am.Chem.Soc.* 114, 6834 (1992), and literature cited therein. Cyclopentene. f V.E. Rivera-Gaines, S.J. Leibowitz, and J. Laane, *J.Am.Chem.Soc.* 113, 9735 (1991). g D. Autrey, J. Choo, and J. Laane, *J.Phys.Chem.A* 105, 10230 (2001). h A. Rauk, J.D. Andose, W.G. Frick, R. Tang, and K. Mislow, *J.Am.Chem.Soc.* 93, 6507 (1971). Inversions at nitrogen. i Taken from the experimental data quoted in: M.J.S. Dewar, W.Thiel, *J.Am.Chem.Soc.* 99, 4907 (1977). j V. Dyczmons, *J.Phys.Chem.A* 104, 8263 (2000). k J.B.Pedley, R.D.Naylor, and S.P.Kirby, "Thermochemical Data of Organic Compounds", 2nd ed., Chapman and Hall, London, 1986. l P.A. Kollman et al., *J.Phys.Chem.* 94, 4483 (1990). Anisole barrier. m Experimental data cited in: W.M.F. Fabian, *J.Comput.Chem.* 9, 369 (1988). n K.W. Butz, D.J. Krajnovich, and C.S. Parmenter, *J.Chem.Phys.* 93, 1557 (1990). Glyoxal internal rotation. o K.B. Wiberg and K.E. Laidig, *J.Am.Chem.Soc.* 109, 5935 (1987). p Experimental data cited in: A. St.-Amant, W. D. Cornell, P. A. Kollman, and T.A. Halgren, *J.Comput.Chem.* 16, 1483 (1995). q P.I. Nagy, D.A. Smith, G. Alagona and C. Ghio, *J.Phys.Chem.* 98, 486 (1994). r S.G.Lias, J.E.Bartmess, J.F.Liebman, J.L.Holmes, R.D.Levin, and W.G.Mallard, "Gas Phase Ion and Neutral Thermochemistry", *J.Phys.Chem.Ref.Data* 17, Suppl. 1 (1988). s K.B. Wiberg and P.R. Rablen, *J.Am.Chem.Soc.* 117, 2201 (1995). t K.B. Wiberg and C.M. Breneman, *J.Am.Chem.Soc.* 114, 831 (1992). u Y. Mo and Q. Zhang, *Int.J.Quant.Chem.* 56, 19 (1995). Computed and cited experimental data on N2O2 and N2O4.

Table S10: Benchmark Results for the FLUOR Set. Heats of Formation (kcal/mol)

| Species                     | Ref.                | OM2    | OM2-D3T | ODM2   | OM3    | OM3-D3T | ODM3   |
|-----------------------------|---------------------|--------|---------|--------|--------|---------|--------|
| Fluorine                    | 0.0 <sup>a</sup>    | 0.6    | 0.5     | -0.9   | -1.7   | -1.8    | -1.3   |
| Hydrogen fluoride           | -65.1 <sup>a</sup>  | -63.3  | -63.4   | -68.6  | -64.9  | -65.0   | -65.2  |
| Methyl fluoride             | -56.0 <sup>a</sup>  | -60.4  | -61.1   | -58.6  | -57.3  | -58.5   | -57.8  |
| Difluoromethane             | -108.1 <sup>b</sup> | -110.9 | -111.6  | -109.4 | -106.6 | -107.8  | -107.1 |
| Trifluoromethane            | -166.2 <sup>b</sup> | -166.8 | -167.6  | -168.0 | -162.0 | -163.3  | -162.4 |
| Tetrafluoromethane          | -223.1 <sup>b</sup> | -220.5 | -221.4  | -227.1 | -215.8 | -217.3  | -216.8 |
| Fluoroethane                | -63.0 <sup>c</sup>  | -67.5  | -69.4   | -66.1  | -65.8  | -68.8   | -65.9  |
| 1,1-Difluoroethane          | -118.8 <sup>b</sup> | -121.8 | -123.6  | -121.5 | -119.4 | -122.4  | -119.8 |
| 1,1,1-Trifluoroethane       | -178.0 <sup>b</sup> | -178.4 | -180.4  | -181.8 | -176.3 | -179.4  | -176.9 |
| Hexafluoroethane            | -321.3 <sup>b</sup> | -317.5 | -319.7  | -323.8 | -310.5 | -314.0  | -311.6 |
| i-Propyl fluoride           | -70.1 <sup>b</sup>  | -76.2  | -79.4   | -75.4  | -75.1  | -80.2   | -75.3  |
| Octafluorocyclobutane       | -368.7 <sup>b</sup> | -379.9 | -384.6  | -385.2 | -372.9 | -380.1  | -373.8 |
| Fluoroethene                | -33.2 <sup>b</sup>  | -32.3  | -33.5   | -31.7  | -32.2  | -34.1   | -32.6  |
| 1,2-Difluoroethene cis      | -71.0 <sup>c</sup>  | -72.2  | -73.5   | -70.8  | -71.7  | -73.7   | -72.2  |
| 1,2-Difluoroethene trans    | -70.0 <sup>c</sup>  | -74.3  | -75.6   | -72.6  | -72.7  | -74.8   | -73.4  |
| 1,1-Difluoroethene          | -80.1 <sup>b</sup>  | -78.4  | -79.6   | -79.7  | -79.9  | -81.9   | -80.1  |
| Trifluoroethene             | -117.2 <sup>b</sup> | -116.4 | -117.7  | -116.3 | -115.9 | -118.0  | -116.3 |
| Tetrafluoroethene           | -157.5 <sup>b</sup> | -156.3 | -157.7  | -158.2 | -155.9 | -158.2  | -156.5 |
| Fluorobenzene               | -27.7 <sup>b</sup>  | -27.3  | -32.3   | -26.7  | -28.0  | -35.9   | -27.9  |
| 1,2-Difluorobenzene         | -70.2 <sup>b</sup>  | -69.1  | -74.1   | -68.7  | -69.9  | -77.9   | -70.0  |
| 1,3-Difluorobenzene         | -73.9 <sup>b</sup>  | -72.9  | -78.0   | -72.5  | -74.0  | -82.0   | -74.0  |
| 1,4-Difluorobenzene         | -73.3 <sup>b</sup>  | -72.6  | -77.6   | -72.2  | -73.5  | -81.5   | -73.8  |
| Pentafluorobenzene          | -192.8 <sup>b</sup> | -191.8 | -197.1  | -192.1 | -192.7 | -201.0  | -192.7 |
| Hexafluorobenzene           | -228.3 <sup>b</sup> | -228.4 | -233.7  | -228.3 | -228.8 | -237.2  | -228.6 |
| Fluoroacetylene             | 25.1 <sup>d</sup>   | 26.9   | 26.2    | 26.8   | 23.9   | 22.9    | 24.1   |
| Difluoroacetylene           | 1.4 <sup>d</sup>    | 4.4    | 3.8     | 3.9    | -2.6   | -3.7    | -3.8   |
| Hypofluorous acid           | -23.5 <sup>a</sup>  | -19.6  | -19.8   | -18.7  | -20.3  | -20.7   | -20.0  |
| Fluoroethanol gauche        | -100.0 <sup>c</sup> | -100.7 | -103.1  | -101.1 | -100.1 | -103.8  | -101.1 |
| 1,1,1-Trifluoroethanol      | -212.3 <sup>a</sup> | -209.2 | -211.6  | -212.4 | -206.4 | -210.2  | -206.7 |
| Trifluoromethylhypofluorite | -182.8 <sup>a</sup> | -174.0 | -175.3  | -176.9 | -166.3 | -168.4  | -168.7 |
| Difluorine monoxide         | 5.9 <sup>a</sup>    | 5.3    | 5.1     | 7.0    | 7.2    | 6.7     | 8.1    |
| Formyl fluoride             | -90.0 <sup>a</sup>  | -86.3  | -86.9   | -85.3  | -88.2  | -89.2   | -89.8  |
| Acetyl fluoride             | -105.7 <sup>b</sup> | -100.0 | -101.6  | -100.2 | -103.0 | -105.7  | -104.4 |
| Carbonyl fluoride           | -145.9 <sup>e</sup> | -136.5 | -137.1  | -137.9 | -138.7 | -139.7  | -141.0 |
| Trifluoroacetic acid trans  | -246.5 <sup>b</sup> | -242.3 | -244.6  | -245.8 | -239.7 | -243.3  | -240.4 |
| p-Fluorobenzoic acid        | -118.2 <sup>b</sup> | -116.9 | -123.9  | -117.4 | -117.4 | -128.3  | -117.8 |
| Trifluoroamine              | -29.8 <sup>b</sup>  | -30.1  | -30.7   | -26.5  | -35.9  | -36.9   | -37.1  |
| (Z)-Difluorodiazene         | 16.4 <sup>a</sup>   | 13.5   | 12.8    | 17.6   | 11.7   | 10.5    | 8.1    |
| (E)-Difluorodiazene         | 19.4 <sup>a</sup>   | 22.7   | 22.0    | 24.0   | 22.4   | 21.3    | 21.0   |
| Tetrafluorohydrazine gauche | -8.0 <sup>c</sup>   | -6.3   | -7.7    | -1.3   | -6.4   | -8.6    | -16.0  |
| Fluorocyanide               | 8.6 <sup>a</sup>    | 1.9    | 1.5     | 1.9    | -1.5   | -2.2    | -2.4   |
| Trifluoroacetone nitrile    | -119.0 <sup>b</sup> | -125.5 | -127.0  | -127.8 | -125.1 | -127.5  | -123.5 |
| Fluorocarbene               | 34.2 <sup>f</sup>   | 24.9   | 24.6    | 25.1   | 24.4   | 23.9    | 26.4   |
| Difluorocarbene             | -43.8 <sup>g</sup>  | -57.8  | -58.1   | -55.8  | -55.7  | -56.3   | -50.0  |
| Nitrosyl fluoride           | -15.7 <sup>a</sup>  | -10.4  | -10.7   | -9.5   | -21.6  | -22.2   | -21.3  |
| Nitryl fluoride             | -26.0 <sup>a</sup>  | -25.7  | -26.4   | -25.4  | -29.3  | -30.4   | -28.9  |
| Fluorine nitrate            | 2.5 <sup>b</sup>    | 2.6    | 1.5     | 1.1    | 4.3    | 2.5     | 3.3    |
| Nitrosyl trifluoride        | -39.0 <sup>a</sup>  | -50.0  | -51.0   | -42.4  | -50.7  | -52.3   | -49.0  |

a M.W.Chase, C.A.Davies, J.R.Downey, D.R.Frurip, R.A.McDonald, and A.N.Syverud, "JANAF Thermochemical Tables", 3rd edition, J.Phys.Chem.Ref.Data 14, Suppl.1 (1985). b J.B.Pedley, R.D.Naylor, and S.P.Kirby, "Thermochemical Data of Organic Compounds", 2nd ed., Chapman and Hall, London, 1986. c S.G.Lias, J.E.Bartmess, J.F.Liebman, J.L.Holmes, R.D.Levin, and W.G.Mallard, "Gas Phase Ion and Neutral Thermochemistry", J.Phys.Chem.Ref.Data 17, Suppl. 1 (1988). d S.Parthiban, J.M.L.Martin, and J.F.Liebman, Mol.Phys. 100, 453 (2002). e N.L.Haworth, M.H.Smith, G.B.Bacskay, and J.C.Mackie, J.Phys.Chem.A 104, 7600 (2000). f J.C.Poutsma, J.A.Paulino, and R.R.Squires, J.Phys.Chem.A 101, 5327 (1997). g J.Demaison, L.Margules, J.M.L.Martin, and J.E.Boggs, Phys.Chem.Chem.Phys. 4, 3282 (2002).

Table S11: Benchmark Results for the FLUOR Set. Ionization Potentials (eV)

| Species                       | Ref.               | OM2   | OM2-D3T | ODM2  | OM3   | OM3-D3T | ODM3  |
|-------------------------------|--------------------|-------|---------|-------|-------|---------|-------|
| Fluorine                      | 15.83 <sup>a</sup> | 16.32 | 16.32   | 16.12 | 16.36 | 16.36   | 16.71 |
| Hydrogen fluoride             | 16.03 <sup>a</sup> | 16.45 | 16.45   | 16.32 | 17.03 | 17.03   | 17.28 |
| Methylfluoride                | 13.31 <sup>a</sup> | 13.07 | 13.07   | 13.11 | 13.41 | 13.41   | 13.67 |
| Difluoromethane               | 13.17 <sup>a</sup> | 12.98 | 12.98   | 13.02 | 13.23 | 13.23   | 13.54 |
| Trifluoromethane              | 14.67 <sup>a</sup> | 14.17 | 14.17   | 14.19 | 14.45 | 14.45   | 14.78 |
| Tetrafluoromethane            | 16.23 <sup>a</sup> | 16.27 | 16.27   | 16.26 | 16.89 | 16.89   | 17.24 |
| Fluoroethane                  | 12.43 <sup>a</sup> | 12.01 | 12.01   | 12.02 | 12.28 | 12.28   | 12.47 |
| 1,1-Difluoroethane            | 12.80 <sup>a</sup> | 12.30 | 12.30   | 12.28 | 12.69 | 12.69   | 12.91 |
| 1,1,1-Trifluoroethane         | 13.80 <sup>a</sup> | 13.23 | 13.23   | 13.21 | 13.78 | 13.78   | 13.98 |
| Hexafluoroethane              | 14.60 <sup>a</sup> | 13.67 | 13.67   | 13.69 | 13.92 | 13.91   | 14.22 |
| Fluoroethene                  | 10.58 <sup>a</sup> | 10.59 | 10.59   | 10.44 | 10.85 | 10.85   | 10.81 |
| 1,2-Difluoroethene cis        | 10.43 <sup>a</sup> | 10.38 | 10.38   | 10.27 | 10.56 | 10.56   | 10.63 |
| 1,2-Difluoroethene trans      | 10.38 <sup>a</sup> | 10.43 | 10.43   | 10.32 | 10.61 | 10.61   | 10.68 |
| 1,1-Difluoroethene            | 10.72 <sup>a</sup> | 10.62 | 10.62   | 10.49 | 10.84 | 10.84   | 10.86 |
| Trifluoroethene               | 10.53 <sup>a</sup> | 10.40 | 10.40   | 10.30 | 10.53 | 10.53   | 10.66 |
| Tetrafluoroethene             | 10.52 <sup>a</sup> | 10.38 | 10.38   | 10.29 | 10.45 | 10.45   | 10.63 |
| Fluorobenzene                 | 9.19 <sup>a</sup>  | 9.58  | 9.58    | 9.43  | 9.85  | 9.85    | 9.79  |
| 1,2-Difluorobenzene           | 9.68 <sup>a</sup>  | 9.71  | 9.71    | 9.57  | 9.92  | 9.92    | 9.91  |
| 1,3-Difluorobenzene           | 9.68 <sup>a</sup>  | 9.79  | 9.79    | 9.65  | 10.02 | 10.02   | 10.00 |
| 1,4-Difluorobenzene           | 9.15 <sup>a</sup>  | 9.58  | 9.58    | 9.45  | 9.80  | 9.80    | 9.81  |
| Hexafluorobenzene             | 10.12 <sup>a</sup> | 10.50 | 10.50   | 10.40 | 10.60 | 10.60   | 10.69 |
| Fluoroacetylene               | 11.30 <sup>a</sup> | 11.33 | 11.33   | 11.21 | 11.52 | 11.52   | 11.51 |
| Hypofluorous acid             | 13.00 <sup>a</sup> | 13.23 | 13.23   | 13.17 | 13.44 | 13.44   | 13.49 |
| 1,1,1-Trifluoroethanol        | 11.74 <sup>a</sup> | 12.04 | 12.04   | 11.99 | 12.34 | 12.34   | 12.42 |
| Trifluoromethylhypofluorite   | 13.64 <sup>a</sup> | 14.01 | 14.01   | 13.94 | 14.20 | 14.20   | 14.36 |
| Difluorine monoxide           | 13.26 <sup>a</sup> | 13.56 | 13.56   | 13.50 | 13.78 | 13.78   | 13.93 |
| Acetyl fluoride               | 11.80 <sup>a</sup> | 11.86 | 11.86   | 11.77 | 12.30 | 12.30   | 12.31 |
| Carbonyl fluoride             | 13.60 <sup>a</sup> | 13.39 | 13.39   | 13.31 | 13.86 | 13.86   | 13.90 |
| Hexafluoroacetone             | 12.09 <sup>a</sup> | 12.03 | 12.03   | 11.95 | 12.16 | 12.16   | 12.24 |
| Trifluoroamine                | 13.73 <sup>a</sup> | 13.29 | 13.29   | 13.44 | 13.68 | 13.68   | 13.99 |
| (E)-Difluorodiazene           | 12.80 <sup>b</sup> | 12.47 | 12.47   | 12.63 | 12.45 | 12.45   | 12.72 |
| Tetrafluorohydrazine gauche   | 12.84 <sup>a</sup> | 12.87 | 12.87   | 12.95 | 12.59 | 12.59   | 13.01 |
| Difluorodiazacyclopropane     | 11.78 <sup>a</sup> | 11.41 | 11.41   | 11.44 | 11.58 | 11.58   | 11.62 |
| Hexafluorodimethyldiimine cis | 11.35 <sup>a</sup> | 11.20 | 11.20   | 11.06 | 10.98 | 10.99   | 11.14 |
| 2,4,6-Trifluorotriazine       | 12.00 <sup>a</sup> | 12.29 | 12.29   | 12.20 | 12.15 | 12.15   | 12.21 |
| Pentafluoropyridine           | 10.27 <sup>a</sup> | 10.59 | 10.59   | 10.48 | 10.65 | 10.65   | 10.67 |
| Difluorocarbene               | 12.27 <sup>a</sup> | 12.18 | 12.18   | 11.99 | 12.12 | 12.12   | 12.14 |
| Nitrosyl fluoride             | 12.94 <sup>a</sup> | 12.80 | 12.80   | 12.82 | 13.00 | 13.00   | 13.04 |
| Nitryl fluoride               | 13.51 <sup>a</sup> | 13.69 | 13.69   | 13.68 | 14.08 | 14.08   | 13.91 |

a Taken from the experimental data quoted in: M.J.S. Dewar, H.S. Rzepa, J.Am.Chem.Soc. 100, 58 (1978). b S.G.Lias, J.E.Bartmess, J.F.Liebman, J.L.Holmes, R.D.Levin, and W.G.Mallard, "Gas Phase Ion and Neutral Thermochemistry", J.Phys.Chem.Ref.Data 17, Suppl. 1 (1988).

Table S12: Benchmark Results for the RADICALS71 Subset of the OVS7-CHNOF Set. Heats of Formation (kcal/mol)

| Species                             | Ref.               | OM2   | OM2-D3T | ODM2  | OM3   | OM3-D3T | ODM3  |
|-------------------------------------|--------------------|-------|---------|-------|-------|---------|-------|
| CH Doublet                          | 142.5 <sup>a</sup> | 140.0 | 139.9   | 136.0 | 138.1 | 137.9   | 134.7 |
| CH2+ Doublet C2v                    | 331.0 <sup>b</sup> | 322.5 | 322.2   | 312.8 | 324.9 | 324.5   | 315.9 |
| Carbene Triplet C2v                 | 93.7 <sup>a</sup>  | 91.9  | 91.6    | 89.6  | 90.3  | 89.8    | 88.7  |
| Carbene Singlet C2v                 | 102.8 <sup>a</sup> | 103.9 | 103.7   | 98.4  | 101.3 | 100.8   | 96.9  |
| Methyl radical C3v                  | 35.0 <sup>c</sup>  | 33.7  | 33.3    | 31.8  | 35.2  | 34.5    | 33.0  |
| Ethyl radical C1                    | 28.9 <sup>c</sup>  | 24.8  | 23.3    | 23.9  | 24.6  | 22.3    | 23.7  |
| n-Propyl radical C1                 | 23.9 <sup>d</sup>  | 20.7  | 17.9    | 19.7  | 20.3  | 15.9    | 19.1  |
| i-Propyl radical C1                 | 21.5 <sup>c</sup>  | 14.3  | 11.6    | 14.1  | 13.4  | 9.0     | 13.2  |
| n-Butyl radical C1                  | 18.0 <sup>b</sup>  | 16.3  | 12.0    | 15.3  | 15.4  | 9.2     | 14.3  |
| sec-Butyl radical C1                | 16.1 <sup>a</sup>  | 9.9   | 5.7     | 9.5   | 8.8   | 2.3     | 7.8   |
| i-Butyl radical C1                  | 16.0 <sup>b</sup>  | 14.7  | 10.2    | 13.4  | 14.9  | 8.0     | 13.4  |
| tert-Butyl radical C1               | 12.3 <sup>c</sup>  | 3.2   | -1.1    | 3.6   | 2.4   | -4.2    | 2.9   |
| Ethylene radical cation D2          | 254.8 <sup>b</sup> | 244.8 | 243.6   | 238.9 | 251.5 | 249.6   | 246.3 |
| Vinyl radical Cs                    | 71.6 <sup>c</sup>  | 67.4  | 66.6    | 66.5  | 66.4  | 64.9    | 66.1  |
| Acetylene radical cation linear D2h | 317.4 <sup>b</sup> | 312.4 | 311.8   | 306.0 | 318.1 | 317.1   | 312.5 |
| Allyl radical C2v                   | 40.8 <sup>c</sup>  | 42.9  | 40.8    | 41.9  | 43.6  | 40.2    | 42.1  |
| Propargyl radical C2v               | 81.0 <sup>d</sup>  | 87.9  | 86.5    | 86.1  | 87.4  | 85.3    | 85.9  |
| Propen-2-yl radical ecl Cs          | 58.1 <sup>b</sup>  | 53.0  | 51.1    | 53.4  | 51.6  | 48.5    | 52.3  |
| Cyclopropenyl radical Cs            | 105.0 <sup>b</sup> | 108.4 | 107.1   | 107.8 | 103.9 | 101.6   | 104.9 |
| Cyclopropyl radical Cs              | 66.9 <sup>b</sup>  | 62.4  | 60.4    | 62.6  | 60.2  | 56.9    | 61.9  |
| Cyclopentadienyl radical C2v        | 58.0 <sup>b</sup>  | 65.3  | 61.7    | 64.1  | 65.1  | 59.3    | 62.8  |
| Phenyl radical C2v                  | 81.2 <sup>e</sup>  | 71.5  | 67.0    | 72.9  | 70.4  | 63.2    | 72.4  |
| Phenoxy radical C2v                 | 12.9 <sup>d</sup>  | 12.5  | 7.3     | 12.6  | 12.6  | 4.4     | 12.3  |
| Benzyl radical C2v                  | 48.4 <sup>c</sup>  | 54.1  | 47.9    | 53.8  | 54.6  | 44.9    | 53.5  |
| Amidyl radical (NH2) C2v            | 45.1 <sup>c</sup>  | 47.8  | 47.5    | 41.1  | 39.3  | 38.9    | 35.4  |
| NH2+ triplet C2v                    | 302.0 <sup>b</sup> | 299.0 | 298.8   | 295.6 | 292.2 | 291.8   | 288.4 |
| Ammonia radical cation D3h          | 223.2 <sup>b</sup> | 216.6 | 216.2   | 214.6 | 214.4 | 213.7   | 213.7 |
| Aminomethyl radical                 | 38.0 <sup>b</sup>  | 29.3  | 28.2    | 28.0  | 25.2  | 23.3    | 27.3  |
| Cyanide radical                     | 104.9 <sup>a</sup> | 111.6 | 111.4   | 109.8 | 102.7 | 102.3   | 101.1 |
| Cyanomethyl radical C2v             | 58.1 <sup>c</sup>  | 64.1  | 63.0    | 62.9  | 62.1  | 60.4    | 61.1  |
| Azidyl radical (N3) Cs              | 99.0 <sup>f</sup>  | 100.0 | 99.5    | 102.8 | 100.8 | 99.9    | 101.7 |
| Hydroxyl radical                    | 9.4 <sup>c</sup>   | 5.3   | 5.3     | 4.0   | 4.3   | 4.2     | 3.1   |
| OH+ triplet                         | 309.1 <sup>b</sup> | 301.9 | 301.8   | 297.8 | 301.8 | 301.6   | 296.5 |
| Water radical cation C2v            | 233.0 <sup>b</sup> | 227.5 | 227.3   | 223.3 | 227.0 | 226.7   | 225.1 |
| Formyl radical (HCO) Cs             | 10.0 <sup>c</sup>  | 0.1   | -0.3    | -0.2  | -4.4  | -4.9    | -3.1  |
| Methoxy radical (CH3O) C1           | 4.1 <sup>c</sup>   | 0.4   | -0.4    | 1.3   | 1.3   | -0.0    | 1.8   |
| Hydroxymethyl radical (CH2OH)       | -4.1 <sup>c</sup>  | -10.8 | -11.5   | -11.7 | -12.2 | -13.5   | -11.3 |
| HO2 radical Cs                      | 2.5 <sup>b</sup>   | -4.3  | -4.6    | -2.9  | -4.2  | -4.7    | -2.1  |
| Acetyl radical (CH3CO) C1           | -2.4 <sup>c</sup>  | -16.1 | -17.3   | -14.7 | -19.9 | -21.9   | -17.6 |
| Cyanate radical (NCO) linear        | 37.0 <sup>b</sup>  | 39.7  | 39.2    | 39.7  | 34.3  | 33.5    | 32.2  |
| Nitric oxide (NO)                   | 21.6 <sup>f</sup>  | 24.5  | 24.4    | 24.1  | 15.2  | 14.9    | 15.6  |
| Nitrogen dioxide (NO2) C2v          | 7.9 <sup>f</sup>   | 5.1   | 4.7     | 3.5   | -1.5  | -2.2    | -1.3  |

<sup>a</sup> L.A.Curtiss, K.Raghavachari, P.C.Redfern, and J.A.Pople, J.Chem.Phys. 106, 1063 (1997). <sup>b</sup> S.G.Lias, J.E.Bartmess, J.F.Liebman, J.L.Holmes, R.D.Levin, and W.G.Mallard, "Gas Phase Ion and Neutral Thermochemistry", J.Phys.Chem.Ref.Data 17, Suppl. 1 (1988). <sup>c</sup> J. Berkowitz, G. B. Ellison, and D. Gutman, J.Phys.Chem. 98, 2744 (1994). <sup>d</sup> W. Tsang, "Heats of Formation of Organic Free Radicals by Kinetic Methods" in: Energetics of Organic Free Radicals, J.A.M. Simoes, A. Greenberg, J.F. Liebman (eds.), Blackie Academic and Professional, London, 1996, pp. 22-58. <sup>e</sup> G3 values derived from the data in: L.A.Curtiss, K.Raghavachari, P.C.Redfern, V.Rassolov, and J.A.Pople, J.Chem.Phys. 112, 7374 (2000). <sup>f</sup> M.W.Chase, C.A.Davies, J.R.Downey, D.R.Frurip, R.A.McDonald, and A.N.Syverud, "JANAF Thermochemical Tables", 3rd edition, J.Phys.Chem.Ref.Data 14, Suppl.1 (1985).

Table S13: Benchmark Results for the RADICALS71 Subset of the OVS7-CHNOF Set. Ionization Potentials (eV)

| Species                      | Ref.               | OM2   | OM2-D3T | ODM2  | OM3   | OM3-D3T | ODM3  |
|------------------------------|--------------------|-------|---------|-------|-------|---------|-------|
| CH Doublet                   | 10.64 <sup>a</sup> | 9.92  | 9.92    | 9.56  | 9.91  | 9.91    | 9.55  |
| Methyl radical C3v           | 9.84 <sup>a</sup>  | 9.81  | 9.81    | 9.53  | 10.12 | 10.12   | 9.88  |
| Ethyl radical C1             | 8.51 <sup>a</sup>  | 8.59  | 8.59    | 8.39  | 8.95  | 8.95    | 8.75  |
| n-Propyl radical C1          | 8.43 <sup>a</sup>  | 8.55  | 8.55    | 8.32  | 8.81  | 8.81    | 8.63  |
| i-Propyl radical C1          | 7.69 <sup>a</sup>  | 7.88  | 7.88    | 7.72  | 8.21  | 8.22    | 8.02  |
| n-Butyl radical C1           | 8.50 <sup>a</sup>  | 8.48  | 8.48    | 8.24  | 8.82  | 8.94    | 8.74  |
| sec-Butyl radical C1         | 7.59 <sup>a</sup>  | 7.83  | 7.83    | 7.66  | 8.12  | 8.12    | 7.87  |
| i-Butyl radical C1           | 8.31 <sup>a</sup>  | 8.55  | 8.55    | 8.30  | 8.85  | 8.86    | 8.67  |
| tert-Butyl radical C1        | 6.92 <sup>a</sup>  | 7.47  | 7.48    | 7.31  | 7.70  | 7.71    | 7.52  |
| Vinyl radical Cs             | 9.45 <sup>a</sup>  | 9.31  | 9.31    | 9.14  | 9.68  | 9.68    | 9.49  |
| Allyl radical C2v            | 8.13 <sup>a</sup>  | 8.07  | 8.07    | 7.81  | 8.35  | 8.35    | 8.13  |
| Propargyl radical C2v        | 8.34 <sup>a</sup>  | 8.42  | 8.42    | 8.15  | 8.64  | 8.64    | 8.41  |
| Cyclopropenyl radical Cs     | 6.60 <sup>b</sup>  | 7.84  | 7.84    | 7.63  | 8.15  | 8.15    | 7.91  |
| Cyclopropyl radical Cs       | 8.05 <sup>a</sup>  | 9.06  | 9.06    | 8.87  | 9.48  | 9.49    | 9.26  |
| Cyclopentadienyl radical C2v | 8.69 <sup>a</sup>  | 8.73  | 8.73    | 8.51  | 9.02  | 9.02    | 8.85  |
| Phenyl radical C2v           | 9.20 <sup>a</sup>  | 9.19  | 9.19    | 8.92  | 9.68  | 9.68    | 9.48  |
| Phenoxy radical C2v          | 8.84 <sup>a</sup>  | 8.59  | 8.59    | 8.44  | 8.86  | 8.87    | 8.72  |
| Benzyl radical C2v           | 7.20 <sup>a</sup>  | 7.34  | 7.34    | 7.09  | 7.61  | 7.61    | 7.41  |
| Amidyl radical (NH2) C2v     | 12.45 <sup>a</sup> | 12.43 | 12.43   | 12.61 | 12.54 | 12.54   | 12.48 |
| Ammonia radical cation D3h   | 23.50 <sup>a</sup> | 22.01 | 22.01   | 22.25 | 21.96 | 21.96   | 21.92 |
| Cyanide radical              | 14.17 <sup>a</sup> | 14.16 | 14.16   | 14.02 | 14.05 | 14.05   | 13.91 |
| Formyl radical (HCO) Cs      | 9.31 <sup>a</sup>  | 9.61  | 9.61    | 9.41  | 9.68  | 9.68    | 9.47  |
| HO2 radical Cs               | 11.53 <sup>a</sup> | 12.21 | 12.21   | 12.14 | 12.42 | 12.42   | 12.33 |
| Nitric oxide (NO)            | 9.25 <sup>a</sup>  | 10.35 | 10.35   | 10.31 | 10.05 | 10.05   | 10.07 |
| Nitrogen dioxide (NO2) C2v   | 9.80 <sup>a</sup>  | 11.48 | 11.48   | 11.33 | 11.37 | 11.37   | 11.23 |

a V.N.Kondratev (ed.), "Dissociation Energies of Chemical Bonds, Ionization Potentials, and Electron Affinities", Nauka, Moscow, 1974 (in Russian). b S.G.Lias, J.E.Bartmess, J.F.Liebman, J.L.Holmes, R.D.Levin, and W.G.Mallard, "Gas Phase Ion and Neutral Thermochemistry", J.Phys.Chem.Ref.Data 17, Suppl. 1 (1988).

Table S14: Benchmark Results for the RADICALS71 Subset of the OVS7-CHNOF Set. Enthalpy Changes at 298 K (kcal/mol)

| Species                     | Ref.              | OM2  | OM2-D3T | ODM2 | OM3  | OM3-D3T | ODM3 |
|-----------------------------|-------------------|------|---------|------|------|---------|------|
| Carbene Triplet linear      | 5.5 <sup>a</sup>  | 5.1  | 5.1     | 4.8  | 7.9  | 7.9     | 6.7  |
| Carbene Singlet C2v         | 9.1 <sup>b</sup>  | 12.0 | 12.0    | 8.9  | 11.0 | 11.0    | 8.2  |
| Carbene Singlet linear      | 28.2 <sup>a</sup> | 21.6 | 21.6    | 24.6 | 25.4 | 25.4    | 27.1 |
| Amidyl radical (NH2) linear | 34.4 <sup>c</sup> | 39.1 | 39.1    | 36.9 | 40.4 | 40.5    | 39.8 |

a M.E.Jacox, "Vibrational and Electronic Energy Levels of Polyatomic Transient Molecules", J.Phys.Chem.Ref.Data Monograph No. 3 (1994). b L.A.Curtiss, K.Raghavachari, P.C.Redfern, and J.A.Pople, J.Chem.Phys. 106, 1063 (1997). c S.G.Lias, J.E.Bartmess, J.F.Liebman, J.L.Holmes, R.D.Levin, and W.G.Mallard, "Gas Phase Ion and Neutral Thermochemistry", J.Phys.Chem.Ref.Data 17, Suppl. 1 (1988).



Table S15: Benchmark Results for the ANIONS24 Subset of the OVS7-CHNOF Set. Heats of Formation (kcal/mol)

| Species  | Ref.                | OM2    | OM2-D3T | ODM2   | OM3    | OM3-D3T | ODM3   |
|----------|---------------------|--------|---------|--------|--------|---------|--------|
| H-       | 33.2 <sup>a</sup>   | 56.7   | 56.7    | 60.4   | 61.1   | 61.1    | 63.7   |
| CH3-     | 33.2 <sup>b</sup>   | 48.9   | 48.5    | 50.0   | 41.3   | 40.5    | 44.1   |
| CH3CH2-  | 35.1 <sup>b</sup>   | 36.6   | 35.1    | 38.6   | 30.3   | 27.9    | 34.1   |
| HCC-     | 65.5 <sup>b</sup>   | 61.9   | 61.4    | 67.5   | 61.7   | 60.9    | 68.3   |
| CH2CH-   | 52.8 <sup>b</sup>   | 52.7   | 51.8    | 56.1   | 47.9   | 46.4    | 52.6   |
| c-C5H5-  | 19.6 <sup>b</sup>   | 28.2   | 24.6    | 32.2   | 20.9   | 15.2    | 23.0   |
| C6H5-    | 54.7 <sup>b</sup>   | 44.9   | 40.4    | 50.4   | 41.6   | 34.4    | 47.5   |
| NH2-     | 27.0 <sup>b</sup>   | 51.6   | 51.4    | 41.4   | 39.8   | 39.4    | 37.6   |
| CH3NH-   | 32.0 <sup>b</sup>   | 31.9   | 30.8    | 27.1   | 25.6   | 23.8    | 24.5   |
| (CH3)2N- | 26.1 <sup>b</sup>   | 17.4   | 15.1    | 15.7   | 17.1   | 13.4    | 14.6   |
| C4H4N-   | 18.9 <sup>b</sup>   | 25.5   | 22.4    | 30.6   | 20.9   | 15.9    | 25.5   |
| NC-      | 17.7 <sup>b</sup>   | 23.5   | 23.2    | 24.3   | 15.7   | 15.3    | 17.3   |
| CH2CN-   | 25.1 <sup>b</sup>   | 37.9   | 36.8    | 38.3   | 32.7   | 30.9    | 31.9   |
| OH-      | -32.7 <sup>b</sup>  | -24.2  | -24.2   | -23.8  | -29.0  | -29.2   | -26.3  |
| CH3O-    | -33.2 <sup>b</sup>  | -46.1  | -46.9   | -42.4  | -51.1  | -52.4   | -48.6  |
| C2H5O-   | -44.5 <sup>b</sup>  | -52.7  | -54.6   | -49.9  | -58.1  | -61.2   | -56.3  |
| C6H5O-   | -39.4 <sup>b</sup>  | -39.2  | -44.3   | -36.1  | -46.2  | -54.4   | -43.3  |
| HCOO-    | -110.9 <sup>b</sup> | -111.8 | -112.4  | -109.0 | -118.7 | -119.8  | -118.1 |
| CH3COO-  | -120.5 <sup>b</sup> | -121.9 | -123.6  | -120.5 | -127.6 | -130.5  | -127.0 |
| C6H5COO- | -97.3 <sup>b</sup>  | -99.8  | -106.4  | -96.6  | -103.7 | -114.0  | -101.9 |
| HOO-     | -22.5 <sup>b</sup>  | -27.5  | -27.7   | -25.2  | -33.9  | -34.4   | -29.1  |
| HCO-     | 1.9 <sup>b</sup>    | -22.8  | -23.1   | -18.4  | -28.5  | -29.0   | -22.2  |
| NO2-     | -45.2 <sup>b</sup>  | -51.1  | -51.5   | -50.5  | -55.6  | -56.3   | -52.6  |
| CH2NO2-  | -27.2 <sup>b</sup>  | -36.5  | -37.9   | -33.4  | -37.4  | -39.7   | -27.8  |

a M.W.Chase, C.A.Davies, J.R.Downey, D.R.Frurip, R.A.McDonald, and A.N.Syverud, "JANAF Thermochemical Tables", 3rd edition, J.Phys.Chem.Ref.Data 14, Suppl.1 (1985). b S.G.Lias, J.E.Bartmess, J.F.Liebman, J.L.Holmes, R.D.Levin, and W.G.Mallard, "Gas Phase Ion and Neutral Thermochemistry", J.Phys.Chem.Ref.Data 17, Suppl. 1 (1988).

Table S16: Benchmark Results for the CATIONS41 Subset of the OVS7-CHNOF Set. Heats of Formation (kcal/mol)

| Species                 | Ref.               | OM2   | OM2-D3T | ODM2  | OM3   | OM3-D3T | ODM3  |
|-------------------------|--------------------|-------|---------|-------|-------|---------|-------|
| H+                      | 365.7 <sup>a</sup> | 343.8 | 343.8   | 340.1 | 339.4 | 339.4   | 336.8 |
| CH+                     | 387.8 <sup>b</sup> | 366.9 | 366.8   | 354.7 | 364.7 | 364.5   | 353.0 |
| CH3+ methyl D3h         | 261.3 <sup>b</sup> | 255.7 | 255.3   | 248.1 | 262.4 | 261.6   | 255.0 |
| C2H3+ nonclassical C2v  | 265.9 <sup>b</sup> | 280.4 | 279.6   | 272.5 | 282.2 | 280.8   | 276.7 |
| C2H5+ nonclassical C2v  | 215.6 <sup>b</sup> | 222.9 | 221.4   | 216.7 | 227.7 | 225.4   | 223.9 |
| C3H3+ cyclopropenyl C2v | 257.0 <sup>b</sup> | 259.4 | 258.0   | 253.8 | 262.2 | 260.0   | 258.3 |
| HCCCH2+ propargyl C2v   | 282.0 <sup>b</sup> | 276.4 | 275.1   | 269.6 | 280.9 | 278.7   | 275.2 |
| C3H5+ allyl C2v         | 226.0 <sup>b</sup> | 223.7 | 221.5   | 217.8 | 230.7 | 227.3   | 225.5 |
| C3H7+ 2-propyl C2v      | 190.9 <sup>b</sup> | 185.1 | 182.4   | 179.8 | 190.0 | 185.6   | 186.5 |
| C3H7+ 1-propyl (29) Cs  | 211.0 <sup>b</sup> | 206.6 | 203.8   | 200.5 | 212.3 | 207.9   | 208.3 |
| C4H7+ methylallyl Cs    | 207.9 <sup>c</sup> | 199.3 | 195.8   | 194.3 | 205.7 | 200.4   | 201.9 |
| C4H9+ n-butyl sec Cs    | 183.0 <sup>b</sup> | 176.8 | 172.7   | 171.9 | 182.1 | 175.6   | 179.0 |
| C4H9+ tert-butyl C3h    | 165.8 <sup>b</sup> | 158.2 | 153.9   | 155.0 | 163.5 | 156.8   | 162.4 |
| C6H5+ phenyl C2v        | 269.3 <sup>b</sup> | 254.5 | 250.1   | 249.1 | 262.6 | 255.5   | 259.8 |
| C6H5CH2+ benzyl Cs      | 215.0 <sup>b</sup> | 214.6 | 208.4   | 210.2 | 221.7 | 212.0   | 217.8 |
| NH2+ triplet C2v        | 302.0 <sup>b</sup> | 299.0 | 298.8   | 295.6 | 292.2 | 291.8   | 288.4 |
| CH2NH2+ C2v             | 179.4 <sup>d</sup> | 174.9 | 173.7   | 172.9 | 173.4 | 171.6   | 175.4 |
| HCNH+ linear            | 226.0 <sup>b</sup> | 221.6 | 221.0   | 214.9 | 211.4 | 210.5   | 209.4 |
| CH3CNH+ C3v             | 195.0 <sup>b</sup> | 201.5 | 199.9   | 193.3 | 190.8 | 188.2   | 187.9 |
| C5H5NH+ pyridinium C2v  | 178.0 <sup>b</sup> | 175.0 | 170.1   | 175.0 | 176.6 | 168.9   | 179.4 |
| OH+ triplet             | 309.1 <sup>b</sup> | 301.9 | 301.8   | 297.8 | 301.8 | 301.6   | 296.5 |
| CHO+ formyl linear      | 197.3 <sup>b</sup> | 194.8 | 194.5   | 190.8 | 192.6 | 192.0   | 190.3 |
| CH3CHOH+ Cs             | 139.0 <sup>b</sup> | 138.8 | 136.9   | 135.7 | 144.0 | 141.0   | 143.4 |
| CH3CO+ acetyl C3v       | 156.0 <sup>b</sup> | 162.3 | 161.0   | 157.3 | 160.6 | 158.6   | 158.2 |
| H3O+ C3v                | 141.0 <sup>b</sup> | 142.9 | 142.5   | 139.0 | 141.7 | 141.1   | 146.2 |
| CH3OH2+ Cs              | 136.0 <sup>b</sup> | 142.4 | 141.0   | 137.3 | 146.6 | 144.5   | 147.7 |
| (CH3)2OH+ Cs            | 130.0 <sup>b</sup> | 141.8 | 139.1   | 136.3 | 151.2 | 147.1   | 149.8 |
| C4H5O+ furan C-prot Cs  | 165.0 <sup>b</sup> | 161.5 | 158.2   | 156.1 | 170.6 | 165.3   | 167.5 |
| OCOH+ Cs                | 141.0 <sup>b</sup> | 150.8 | 150.2   | 145.5 | 148.5 | 147.5   | 145.1 |
| H2COH+ Cs               | 169.3 <sup>e</sup> | 166.4 | 165.7   | 162.3 | 172.4 | 171.2   | 171.0 |
| HC(OH)2+ Cs             | 96.0 <sup>b</sup>  | 100.2 | 99.0    | 96.4  | 106.0 | 104.2   | 104.9 |
| NO+                     | 235.3 <sup>b</sup> | 259.8 | 259.7   | 258.4 | 243.6 | 243.3   | 244.8 |
| NO2+ linear             | 233.0 <sup>b</sup> | 239.7 | 239.3   | 234.2 | 230.8 | 230.1   | 229.0 |

a J.B.Pedley, R.D.Naylor, and S.P.Kirby, "Thermochemical Data of Organic Compounds", 2nd ed., Chapman and Hall, London, 1986. b S.G.Lias, J.E.Bartmess, J.F.Liebman, J.L.Holmes, R.D.Levin, and W.G.Mallard, "Gas Phase Ion and Neutral Thermochemistry", J.Phys.Chem.Ref.Data 17, Suppl. 1 (1988). c J.C. Traeger, J.Phys.Chem. 90, 4114 (1986). d G. de Oliveira, J.M.L.Martin, I.K.C.Silwal, and J.F.Liebman, J.Comp.Chem. 22, 1297 (2001). e J.C. Traeger and J.L. Holmes, J.Phys.Chem. 97, 3453 (1993).

Table S17: Benchmark Results for the CATIONS41 Subset of the OVS7-CHNOF Set. Enthalpy Changes at 298 K (kcal/mol)

| Species                | Ref.               | OM2   | OM2-D3T | ODM2  | OM3   | OM3-D3T | ODM3  |
|------------------------|--------------------|-------|---------|-------|-------|---------|-------|
| HCCCH2+ propargyl C2v  | 27.0 <sup>a</sup>  | 17.0  | 17.1    | 15.8  | 18.7  | 18.8    | 16.9  |
| C3H7+ 1-propyl (29) Cs | 20.1 <sup>a</sup>  | 21.4  | 21.4    | 20.7  | 22.3  | 22.2    | 21.7  |
| C4H9+ tert-butyl C3h   | -17.2 <sup>a</sup> | -18.6 | -18.8   | -16.8 | -18.6 | -18.8   | -16.6 |
| NH2+ singlet C2v       | 30.1 <sup>b</sup>  | 26.0  | 26.0    | 26.7  | 26.1  | 26.0    | 24.7  |
| OH+ singlet            | 50.5 <sup>b</sup>  | 35.5  | 35.5    | 35.5  | 35.5  | 35.5    | 35.5  |

a S.G.Lias, J.E.Bartmess, J.F.Liebman, J.L.Holmes, R.D.Levin, and W.G.Mallard, "Gas Phase Ion and Neutral Thermochemistry", J.Phys.Chem.Ref.Data 17, Suppl. 1 (1988). b M.E.Jacox, "Vibrational and Electronic Energy Levels of Polyatomic Transient Molecules", J.Phys.Chem.Ref.Data Monograph No. 3 (1994).

Table S18: Benchmark Results for the BIGMOL20 Subset of the OVS7-CHNOF Set. Heats of Formation (kcal/mol)

| Species                  | Ref.                | OM2    | OM2-D3T | ODM2   | OM3    | OM3-D3T | ODM3   |
|--------------------------|---------------------|--------|---------|--------|--------|---------|--------|
| Tetrahydro-2H-pyran      | -53.4 <sup>a</sup>  | -53.1  | -59.6   | -54.5  | -51.7  | -61.8   | -53.8  |
| Maleic anhydride         | -95.2 <sup>a</sup>  | -87.1  | -90.4   | -87.4  | -87.2  | -92.5   | -90.4  |
| Cyclohexanone            | -54.0 <sup>a</sup>  | -59.9  | -67.6   | -60.0  | -62.1  | -73.7   | -61.8  |
| Benzoquinone             | -29.4 <sup>a</sup>  | -32.5  | -37.9   | -31.6  | -32.9  | -41.3   | -32.0  |
| Hydroquinone             | -63.4 <sup>a</sup>  | -60.6  | -66.7   | -63.2  | -64.6  | -74.2   | -64.4  |
| 2-Methoxytetrahydropyran | -95.5 <sup>a</sup>  | -97.2  | -106.1  | -99.2  | -90.3  | -103.6  | -95.2  |
| Naphthalene              | 35.9 <sup>a</sup>   | 34.8   | 25.3    | 35.8   | 35.7   | 21.0    | 35.7   |
| 2-Aminobenzoic acid      | -70.7 <sup>a</sup>  | -68.6  | -77.0   | -73.1  | -70.8  | -83.6   | -71.2  |
| 1-Naphthol               | -7.1 <sup>a</sup>   | -5.1   | -15.3   | -5.5   | -5.5   | -21.3   | -5.3   |
| 2-Naphthol               | -7.2 <sup>a</sup>   | -5.9   | -16.0   | -6.6   | -6.6   | -22.2   | -6.6   |
| 1,4-Naphthoquinone       | -26.5 <sup>a</sup>  | -32.7  | -42.7   | -31.5  | -31.8  | -47.3   | -30.9  |
| Isophthalic acid         | -166.4 <sup>a</sup> | -159.5 | -168.5  | -160.8 | -159.4 | -173.2  | -160.5 |
| Terephthalic acid        | -171.6 <sup>a</sup> | -159.5 | -168.4  | -160.7 | -159.2 | -173.0  | -160.2 |
| 1-Naphthoic acid         | -53.3 <sup>a</sup>  | -55.2  | -67.0   | -55.3  | -52.8  | -71.0   | -53.3  |
| 2-Naphthoic acid         | -55.6 <sup>a</sup>  | -55.1  | -66.7   | -55.3  | -53.9  | -71.7   | -54.6  |
| Anthracene               | 55.2 <sup>a</sup>   | 55.5   | 41.4    | 56.4   | 57.5   | 35.8    | 57.0   |
| Phenanthrene             | 49.6 <sup>b</sup>   | 46.8   | 32.4    | 48.0   | 49.1   | 27.0    | 48.8   |
| 9,10-Anthraquinone       | -22.8 <sup>a</sup>  | -32.7  | -47.5   | -31.4  | -30.4  | -53.0   | -29.5  |
| 9,10-Phenanthraquinone   | -33.3 <sup>a</sup>  | -23.6  | -38.5   | -21.6  | -21.6  | -44.4   | -20.7  |
| 5,12-Naphthacenequinone  | -8.1 <sup>a</sup>   | -17.5  | -36.9   | -16.2  | -14.0  | -43.6   | -13.6  |

a J.B.Pedley, R.D.Naylor, and S.P.Kirby, "Thermochemical Data of Organic Compounds", 2nd ed., Chapman and Hall, London, 1986. b S.G.Lias, J.E.Bartmess, J.F.Liebman, J.L.Holmes, R.D.Levin, and W.G.Mallard, "Gas Phase Ion and Neutral Thermochemistry", J.Phys.Chem.Ref.Data 17, Suppl. 1 (1988).

Table S19: Benchmark Results for the ISOMERS44 Subset of the OVS7-CHNOF Set. Heats of Formation (kcal/mol)

| Species            | Ref.               | OM2   | OM2-D3T | ODM2  | OM3   | OM3-D3T | ODM3  |
|--------------------|--------------------|-------|---------|-------|-------|---------|-------|
| n-Pentane          | -35.1 <sup>a</sup> | -34.7 | -40.8   | -34.7 | -35.2 | -44.6   | -34.9 |
| 2-Methylbutane     | -36.7 <sup>a</sup> | -35.9 | -42.4   | -36.1 | -35.5 | -45.4   | -35.5 |
| Neopentane         | -40.2 <sup>a</sup> | -39.6 | -46.4   | -40.2 | -37.6 | -48.1   | -38.2 |
| n-Hexane           | -39.9 <sup>a</sup> | -39.2 | -46.9   | -39.4 | -40.0 | -51.6   | -39.9 |
| 3-Methylpentane    | -41.1 <sup>a</sup> | -39.9 | -48.2   | -40.2 | -39.5 | -52.0   | -39.9 |
| 2-Methylpentane    | -41.8 <sup>a</sup> | -40.4 | -48.5   | -40.9 | -40.3 | -52.5   | -40.6 |
| 2,3-Dimethylbutane | -42.6 <sup>a</sup> | -41.1 | -49.7   | -41.7 | -39.8 | -52.8   | -40.4 |
| 2,2-Dimethylbutane | -44.5 <sup>a</sup> | -42.8 | -51.6   | -43.4 | -40.7 | -54.0   | -41.5 |
| But-1-ene H-ecl    | 0.0 <sup>a</sup>   | 0.1   | -3.8    | 0.1   | 0.3   | -5.7    | 0.3   |
| cis-2-Butene       | -1.7 <sup>a</sup>  | -1.9  | -5.8    | -2.0  | -2.2  | -8.2    | -2.3  |
| trans-2-Butene     | -2.7 <sup>a</sup>  | -3.8  | -7.5    | -3.7  | -4.0  | -9.8    | -3.9  |
| Isobutene          | -4.0 <sup>a</sup>  | -4.3  | -8.2    | -4.0  | -3.9  | -10.0   | -3.6  |
| 1-Butyne           | 39.5 <sup>a</sup>  | 39.5  | 36.5    | 39.3  | 39.2  | 34.6    | 39.5  |
| 2-Butyne           | 34.8 <sup>a</sup>  | 35.1  | 32.4    | 34.5  | 33.8  | 29.6    | 34.1  |
| Cyclooctatetraene  | 70.7 <sup>a</sup>  | 75.2  | 67.2    | 74.3  | 73.9  | 61.6    | 72.1  |
| Dimethylamine      | -4.4 <sup>a</sup>  | -5.1  | -7.9    | -4.2  | -2.2  | -6.5    | -3.2  |
| Ethylamine         | -11.3 <sup>a</sup> | -8.9  | -11.7   | -10.9 | -12.1 | -16.5   | -11.9 |
| Acetonitrile       | 18.0 <sup>b</sup>  | 17.5  | 16.2    | 17.3  | 15.3  | 13.2    | 15.3  |
| Methylisocyanide   | 39.1 <sup>a</sup>  | 38.3  | 36.9    | 37.6  | 26.7  | 24.4    | 21.8  |
| Propanol           | -61.0 <sup>a</sup> | -61.9 | -65.6   | -61.9 | -62.2 | -67.9   | -61.6 |
| Isopropanol        | -65.2 <sup>a</sup> | -66.7 | -70.5   | -68.7 | -67.2 | -73.1   | -67.5 |
| n-Butanol          | -65.7 <sup>a</sup> | -66.4 | -71.6   | -68.0 | -67.6 | -75.5   | -67.9 |
| Isobutanol         | -67.8 <sup>a</sup> | -67.5 | -73.0   | -69.6 | -68.1 | -76.7   | -68.5 |
| 2-Butanol          | -70.0 <sup>a</sup> | -71.2 | -76.6   | -73.4 | -71.7 | -80.0   | -72.2 |
| tert-Butanol       | -74.7 <sup>a</sup> | -76.8 | -82.4   | -78.1 | -75.9 | -84.5   | -76.1 |
| Dimethylether      | -44.0 <sup>a</sup> | -45.6 | -47.7   | -45.9 | -42.8 | -46.2   | -44.3 |
| Ethanol            | -56.2 <sup>a</sup> | -56.9 | -59.1   | -56.7 | -57.2 | -60.8   | -56.6 |

a J.B.Pedley, R.D.Naylor, and S.P.Kirby, "Thermochemical Data of Organic Compounds", 2nd ed., Chapman and Hall, London, 1986. b S.G.Lias, J.E.Bartmess, J.F.Liebman, J.L.Holmes, R.D.Levin, and W.G.Mallard, "Gas Phase Ion and Neutral Thermochemistry", J.Phys.Chem.Ref.Data 17, Suppl. 1 (1988).

Table S20: Benchmark Results for the ISOMERS44 Subset of the OVS7-CHNOF Set. Enthalpy Changes at 298 K (kcal/mol)

| Species            | Ref.               | OM2   | OM2-D3T | ODM2  | OM3   | OM3-D3T | ODM3  |
|--------------------|--------------------|-------|---------|-------|-------|---------|-------|
| 2-Methylbutane     | -1.6               | -1.2  | -1.6    | -1.4  | -0.3  | -0.9    | -0.7  |
| Neopentane         | -5.1 <sup>a</sup>  | -4.9  | -5.6    | -5.5  | -2.5  | -3.5    | -3.4  |
| 3-Methylpentane    | -1.2 <sup>a</sup>  | -0.6  | -1.3    | -0.8  | 0.5   | -0.4    | 0.0   |
| 2-Methylpentane    | -1.8 <sup>a</sup>  | -1.2  | -1.7    | -1.5  | -0.3  | -0.9    | -0.7  |
| 2,3-Dimethylbutane | -2.7 <sup>a</sup>  | -1.9  | -2.8    | -2.3  | 0.2   | -1.1    | -0.5  |
| 2,2-Dimethylbutane | -4.5 <sup>a</sup>  | -3.5  | -4.7    | -4.0  | -0.7  | -2.3    | -1.5  |
| cis-2-Butene       | -1.7 <sup>a</sup>  | -2.0  | -2.0    | -2.1  | -2.5  | -2.6    | -2.6  |
| trans-2-Butene     | -2.7 <sup>a</sup>  | -3.9  | -3.7    | -3.8  | -4.3  | -4.1    | -4.2  |
| Isobutene          | -4.0 <sup>a</sup>  | -4.4  | -4.5    | -4.1  | -4.2  | -4.4    | -3.9  |
| 2-Butyne           | -4.7 <sup>a</sup>  | -4.4  | -4.1    | -4.8  | -5.4  | -4.9    | -5.5  |
| Ethylamine         | -6.9 <sup>a</sup>  | -3.7  | -3.8    | -6.7  | -9.8  | -10.0   | -8.7  |
| Methylisocyanide   | 21.1 <sup>a</sup>  | 20.8  | 20.7    | 20.2  | 11.4  | 11.2    | 6.4   |
| Isopropanol        | -4.2 <sup>a</sup>  | -4.7  | -4.9    | -6.8  | -5.0  | -5.3    | -5.9  |
| Isobutanol         | -2.1 <sup>a</sup>  | -1.1  | -1.5    | -1.6  | -0.5  | -1.2    | -0.7  |
| 2-Butanol          | -4.3 <sup>a</sup>  | -4.8  | -5.0    | -5.4  | -4.2  | -4.4    | -4.3  |
| tert-Butanol       | -9.0 <sup>a</sup>  | -10.4 | -10.8   | -10.1 | -8.3  | -8.9    | -8.3  |
| Ethanol            | -12.2 <sup>a</sup> | -11.3 | -11.4   | -10.8 | -14.5 | -14.6   | -12.3 |

<sup>a</sup> J.B.Pedley, R.D.Naylor, and S.P.Kirby, "Thermochemical Data of Organic Compounds", 2nd ed., Chapman and Hall, London, 1986.

Table S21: Benchmark Results for the CONFORMERS30 Subset of the OVS7-CHNOF Set.  
Heats of Formation (kcal/mol)

| Species                       | Ref.               | OM2   | OM2-D3T | ODM2  | OM3   | OM3-D3T | ODM3  |
|-------------------------------|--------------------|-------|---------|-------|-------|---------|-------|
| Propane tr/tr                 | -25.0 <sup>a</sup> | -25.5 | -28.7   | -25.2 | -25.4 | -30.4   | -24.8 |
| Biphenyl                      | 43.6 <sup>b</sup>  | 39.0  | 27.0    | 40.1  | 40.1  | 21.8    | 40.0  |
| n-Butane                      | -30.0 <sup>a</sup> | -30.1 | -34.8   | -29.9 | -30.3 | -37.5   | -29.8 |
| Cyclohexane chair             | -29.5 <sup>a</sup> | -27.1 | -35.0   | -27.2 | -28.5 | -40.5   | -28.5 |
| Methylcyclohexane eq          | -37.0 <sup>b</sup> | -33.9 | -43.7   | -34.7 | -34.8 | -49.5   | -35.6 |
| 1,4-tr-Dimethylcyclohexane ee | -44.1 <sup>a</sup> | -40.8 | -52.4   | -42.2 | -41.1 | -58.5   | -42.6 |
| Dimethylether tr/tr           | -44.0 <sup>a</sup> | -45.6 | -47.7   | -45.9 | -42.8 | -46.2   | -44.3 |
| 2-Methoxytetrahydropyran ax   | -95.5 <sup>a</sup> | -97.2 | -106.1  | -99.2 | -90.3 | -103.6  | -95.2 |
| Aminocyclohexane eq           | -25.0 <sup>b</sup> | -17.3 | -26.5   | -22.8 | -21.2 | -35.1   | -22.9 |
| N-Methylpiperidine eq         | -12.0 <sup>b</sup> | -10.1 | -19.2   | -9.2  | -4.8  | -18.4   | -8.8  |
| 4-Methylpiperidine eq         | -19.0 <sup>b</sup> | -13.5 | -22.7   | -15.5 | -13.5 | -27.4   | -15.2 |

a J.B.Pedley, R.D.Naylor, and S.P.Kirby, "Thermochemical Data of Organic Compounds", 2nd ed., Chapman and Hall, London, 1986. b S.G.Lias, J.E.Bartmess, J.F.Liebman, J.L.Holmes, R.D.Levin, and W.G.Mallard, "Gas Phase Ion and Neutral Thermochemistry", J.Phys.Chem.Ref.Data 17, Suppl. 1 (1988).

Table S22: Benchmark Results for the CONFORMERS30 Subset of the OVS7-CHNOF Set.  
Enthalpy Changes at 298 K (kcal/mol)

| Species                       | Ref.             | OM2 | OM2-D3T | ODM2 | OM3  | OM3-D3T | ODM3 |
|-------------------------------|------------------|-----|---------|------|------|---------|------|
| Propane tr/cis                | 3.7 <sup>a</sup> | 2.7 | 2.7     | 2.2  | 2.3  | 2.4     | 2.0  |
| Propane cis/cis               | 8.8 <sup>a</sup> | 5.6 | 5.6     | 4.7  | 4.9  | 4.9     | 4.0  |
| n-Butane cis                  | 6.0 <sup>b</sup> | 5.1 | 4.9     | 5.0  | 5.0  | 4.7     | 5.0  |
| n-Butane gauche               | 0.8 <sup>c</sup> | 0.8 | 0.7     | 0.9  | 0.9  | 0.7     | 0.9  |
| Cyclohexane boat              | 5.5 <sup>b</sup> | 6.1 | 6.2     | 6.2  | 5.7  | 5.7     | 6.0  |
| Cyclohexane twist             | 4.8 <sup>b</sup> | 5.2 | 5.2     | 5.7  | 5.0  | 5.0     | 5.7  |
| Methylcyclohexane ax          | 1.7 <sup>b</sup> | 1.8 | 1.5     | 2.1  | 1.8  | 1.4     | 2.2  |
| t-Butyl-Cyclohexane ax        | 4.8 <sup>b</sup> | 5.6 | 5.1     | 6.0  | 5.1  | 4.5     | 5.6  |
| 1,4-tr-Dimethylcyclohexane aa | 3.6              | 3.6 | 2.9     | 4.3  | 3.7  | 2.9     | 4.4  |
| Dimethylether tr/cis          | 2.7 <sup>a</sup> | 2.0 | 2.0     | 1.5  | 1.8  | 1.8     | 1.2  |
| Dimethylether cis/cis         | 7.0 <sup>a</sup> | 3.2 | 3.3     | 2.2  | 3.0  | 3.1     | 1.8  |
| Dihydroxymethane g+g-         | 3.5 <sup>d</sup> | 2.7 | 2.7     | 2.7  | 3.5  | 3.4     | 3.0  |
| Dihydroxymethane aa           | 9.2 <sup>d</sup> | 8.8 | 8.8     | 10.7 | 10.0 | 10.0    | 10.2 |
| 2-Methoxytetrahydropyran eq   | 1.1 <sup>e</sup> | 3.0 | 3.0     | 2.9  | 3.6  | 3.6     | 2.1  |
| Aminocyclohexane ax           | 1.4 <sup>e</sup> | 1.8 | 1.7     | 0.4  | 2.0  | 1.8     | 1.8  |
| N-Methylpiperidine ax         | 3.1 <sup>e</sup> | 1.3 | 1.0     | 4.0  | 0.6  | 0.2     | 1.4  |
| 4-Methylpiperidine ax         | 1.9 <sup>b</sup> | 1.7 | 1.4     | 2.1  | 1.9  | 1.5     | 2.3  |

a J.B.Pedley, R.D.Naylor, and S.P.Kirby, "Thermochemical Data of Organic Compounds", 2nd ed., Chapman and Hall, London, 1986. b Experimental data cited in: B. Testa, "Grundlagen der Organischen Stereochemie", VCH, Weinheim, 1983. c Experimental data cited in: T.A. Halgren and R.B. Nachbar, J.Comput.Chem. 17, 587 (1996). d U. Salzner and P.v.R. Schleyer, J.Am.Chem.Soc. 115, 10231 (1993). e Experimental data cited in: A. St.-Amant, W. D. Cornell, P. A. Kollman, and T.A. Halgren, J.Comput.Chem. 16, 1483 (1995).



Table S23: Benchmark Results for the FLUORINE91 Subset of the OVS7-CHNOF Set.  
Heats of Formation (kcal/mol)

| Species      | Ref.                | OM2    | OM2-D3T | ODM2   | OM3    | OM3-D3T | ODM3   |
|--------------|---------------------|--------|---------|--------|--------|---------|--------|
| 2: CH3F      | -56.9 <sup>a</sup>  | -60.4  | -61.1   | -58.6  | -57.3  | -58.5   | -57.8  |
| 3: CH2F2     | -108.4 <sup>a</sup> | -110.9 | -111.6  | -109.4 | -106.6 | -107.8  | -107.1 |
| 4: CHF3      | -167.1 <sup>a</sup> | -166.8 | -167.6  | -168.0 | -162.0 | -163.3  | -162.4 |
| 5: CF4       | -223.9 <sup>a</sup> | -220.5 | -221.4  | -227.1 | -215.8 | -217.3  | -216.8 |
| 7: CH2F      | -7.7 <sup>a</sup>   | -13.6  | -14.1   | -12.6  | -13.1  | -13.9   | -13.3  |
| 8: CHF2      | -58.6 <sup>a</sup>  | -68.0  | -68.6   | -66.9  | -67.5  | -68.4   | -66.0  |
| 9: CF3       | -112.2 <sup>a</sup> | -123.2 | -123.8  | -124.1 | -122.6 | -123.6  | -120.0 |
| 11: CHF      | 34.8 <sup>a</sup>   | 24.9   | 24.6    | 25.1   | 24.4   | 23.9    | 26.4   |
| 12: CF2      | -46.6 <sup>a</sup>  | -57.8  | -58.1   | -55.8  | -55.7  | -56.3   | -50.0  |
| 14: CF       | 58.0 <sup>a</sup>   | 52.3   | 52.2    | 55.4   | 52.7   | 52.4    | 57.2   |
| 16: CHFO     | -92.0 <sup>a</sup>  | -86.3  | -86.9   | -85.3  | -88.2  | -89.2   | -89.8  |
| 17: CF2O     | -145.7 <sup>a</sup> | -136.5 | -137.1  | -137.9 | -138.7 | -139.7  | -141.0 |
| 19: CFO      | -42.7 <sup>a</sup>  | -50.7  | -51.1   | -48.6  | -54.5  | -55.1   | -52.7  |
| 21: CH2FOH   | -101.9 <sup>a</sup> | -103.2 | -104.2  | -103.0 | -100.6 | -102.3  | -101.8 |
| 22: CHF2OH   | -161.6 <sup>a</sup> | -162.5 | -163.7  | -163.8 | -157.8 | -159.7  | -159.9 |
| 23: CF3OH    | -218.3 <sup>a</sup> | -215.1 | -216.3  | -219.6 | -209.8 | -211.8  | -212.4 |
| 24: CH3OF    | -21.5 <sup>a</sup>  | -22.1  | -23.2   | -20.8  | -19.8  | -21.5   | -20.1  |
| 25: CH2FOF   | -71.2 <sup>a</sup>  | -71.3  | -72.5   | -69.3  | -66.4  | -68.3   | -67.9  |
| 26: CHF2OF   | -123.9 <sup>a</sup> | -123.5 | -124.7  | -123.5 | -117.0 | -119.0  | -119.1 |
| 27: CF3OF    | -178.0 <sup>a</sup> | -174.0 | -175.3  | -176.9 | -166.3 | -168.4  | -168.7 |
| 29: CH2FO    | -48.9 <sup>a</sup>  | -49.9  | -50.8   | -49.1  | -47.0  | -48.4   | -49.4  |
| 30: CHF2O    | -98.0 <sup>a</sup>  | -99.0  | -99.9   | -99.5  | -93.2  | -94.6   | -96.5  |
| 31: CF3O     | -151.2 <sup>a</sup> | -150.5 | -151.4  | -153.4 | -143.8 | -145.3  | -147.4 |
| 33: CHFOH    | -53.0 <sup>a</sup>  | -64.2  | -65.1   | -63.1  | -63.2  | -64.6   | -61.4  |
| 34: CF2OH    | -108.7 <sup>a</sup> | -122.6 | -123.5  | -122.4 | -120.3 | -121.7  | -118.3 |
| 35: CH2OF    | 26.1 <sup>a</sup>   | -17.0  | -17.8   | -14.4  | -12.0  | -13.4   | -13.5  |
| 36: CHFOF    | -15.3 <sup>a</sup>  | -28.8  | -29.7   | -24.7  | -24.6  | -26.0   | -18.9  |
| 38: CF3OOH   | -193.1 <sup>a</sup> | -193.9 | -195.5  | -196.7 | -185.7 | -188.3  | -188.0 |
| 40: CF3OO    | -152.9 <sup>a</sup> | -157.5 | -158.9  | -159.7 | -147.8 | -150.0  | -148.3 |
| 42: FCOOH    | -146.9 <sup>a</sup> | -136.4 | -137.3  | -137.5 | -137.1 | -138.7  | -139.6 |
| 44: FCOO-B2  | -86.5 <sup>a</sup>  | -70.0  | -70.7   | -68.7  | -66.5  | -67.7   | -71.7  |
| 46: CF2OHOH  | -212.3 <sup>a</sup> | -210.6 | -212.2  | -211.7 | -203.5 | -206.1  | -207.8 |
| 48: OCF2OH   | -146.9 <sup>a</sup> | -145.5 | -146.8  | -147.6 | -139.1 | -141.2  | -144.3 |
| 50: CH3CH2F  | -65.7 <sup>a</sup>  | -67.5  | -69.4   | -66.1  | -65.8  | -68.8   | -65.9  |
| 51: CH2FCH2F | -107.3 <sup>a</sup> | -111.3 | -113.1  | -108.7 | -106.9 | -109.9  | -108.4 |
| 52: CH3CHF2  | -121.3 <sup>a</sup> | -121.8 | -123.6  | -121.5 | -119.4 | -122.4  | -119.8 |
| 53: CHF2CH2F | -161.1 <sup>a</sup> | -164.1 | -166.0  | -162.7 | -159.0 | -162.1  | -160.3 |
| 54: CH3CF3   | -181.3 <sup>a</sup> | -178.4 | -180.4  | -181.8 | -176.3 | -179.4  | -176.9 |
| 55: CHF2CHF2 | -212.5 <sup>a</sup> | -213.2 | -215.2  | -212.8 | -206.0 | -209.2  | -207.3 |
| 56: CH2FCF3  | -219.0 <sup>a</sup> | -217.3 | -219.3  | -219.4 | -212.3 | -215.5  | -213.5 |
| 60: CH2FCH2  | -14.7 <sup>a</sup>  | -20.7  | -22.2   | -20.6  | -19.2  | -21.7   | -21.2  |
| 61: CH3CHF   | -18.2 <sup>a</sup>  | -25.9  | -27.4   | -24.8  | -27.1  | -29.5   | -26.4  |
| 62: CH2FCHF  | -58.1 <sup>a</sup>  | -68.8  | -70.3   | -66.5  | -67.5  | -70.0   | -68.0  |
| 63: CHF2CH2  | -68.3 <sup>a</sup>  | -72.6  | -74.1   | -73.4  | -70.0  | -72.5   | -72.1  |
| 64: CH3CF2   | -71.9 <sup>a</sup>  | -81.9  | -83.4   | -81.3  | -83.2  | -85.7   | -81.1  |
| 65: CH2FCF2  | -110.0 <sup>a</sup> | -121.4 | -123.0  | -119.5 | -119.5 | -122.1  | -118.7 |
| 66: CHF2CHF  | -110.6 <sup>a</sup> | -119.2 | -120.8  | -117.9 | -115.8 | -118.4  | -116.7 |
| 67: CF3CH2   | -127.3 <sup>a</sup> | -127.3 | -129.0  | -131.5 | -124.3 | -126.9  | -126.7 |
| 68: CF3CHF   | -168.3 <sup>a</sup> | -172.1 | -173.8  | -174.1 | -168.8 | -171.5  | -169.4 |
| 69: CHF2CF2  | -160.3 <sup>a</sup> | -169.9 | -171.6  | -169.4 | -165.9 | -168.6  | -165.5 |
| 72: CH2CHF   | -34.4 <sup>a</sup>  | -32.3  | -33.5   | -31.7  | -32.2  | -34.1   | -32.6  |
| 73: CHFCHF-Z | -73.8 <sup>a</sup>  | -74.3  | -75.6   | -72.6  | -72.7  | -74.8   | -73.4  |
| 74: CHFCHF-E | -74.5 <sup>a</sup>  | -72.2  | -73.5   | -70.8  | -71.7  | -73.7   | -72.2  |
| 75: CH2CF2   | -84.5 <sup>a</sup>  | -78.4  | -79.6   | -79.7  | -79.9  | -81.9   | -80.1  |
| 76: CHFCF2   | -120.1 <sup>a</sup> | -116.4 | -117.7  | -116.3 | -115.9 | -118.0  | -116.3 |
| 77: CF2CF2   | -162.3 <sup>a</sup> | -158.5 | -159.8  | -158.9 | -155.9 | -158.2  | -156.5 |
| 79: CH2FCH   | 40.7 <sup>a</sup>   | 30.9   | 29.7    | 29.5   | 30.2   | 28.2    | 28.4   |
| 81: CF3CH    | -58.2 <sup>a</sup>  | -60.9  | -62.2   | -66.4  | -57.8  | -60.0   | -60.6  |
| 82: CH3CF    | 17.9 <sup>a</sup>   | -3.9   | -5.1    | -2.2   | -3.8   | -5.8    | 0.7    |
| 83: CH2FCF   | -21.7 <sup>a</sup>  | -41.9  | -43.1   | -39.0  | -38.4  | -40.4   | -35.1  |
| 84: CHF2CF   | -67.7 <sup>a</sup>  | -87.4  | -88.7   | -85.3  | -82.7  | -84.8   | -79.2  |
| 85: CF3CF    | -124.0 <sup>a</sup> | -138.8 | -140.2  | -139.4 | -133.1 | -135.4  | -129.5 |

... continued on next page ...

Table S23: ... continued from previous page ...

| Species      | Ref.                | OM2    | OM2-D3T | ODM2   | OM3    | OM3-D3T | ODM3   |
|--------------|---------------------|--------|---------|--------|--------|---------|--------|
| 87: CHFCH-Z  | 28.7 <sup>a</sup>   | 27.1   | 26.2    | 27.6   | 26.9   | 25.4    | 26.3   |
| 88: CHFCH-E  | 28.3 <sup>a</sup>   | 28.4   | 27.5    | 28.6   | 27.7   | 26.2    | 27.2   |
| 89: CH2CF    | 26.0 <sup>a</sup>   | 20.2   | 19.3    | 21.3   | 17.2   | 15.7    | 19.4   |
| 90: CHF2CF-Z | -10.8 <sup>a</sup>  | -16.7  | -17.7   | -14.1  | -18.4  | -20.0   | -16.2  |
| 91: CHF2CF-E | -10.4 <sup>a</sup>  | -17.0  | -17.9   | -14.5  | -18.1  | -19.7   | -15.9  |
| 92: CF2CH    | -18.7 <sup>a</sup>  | -14.9  | -15.8   | -16.0  | -16.3  | -17.8   | -16.6  |
| 93: CF2CF    | -54.0 <sup>a</sup>  | -56.9  | -57.8   | -55.3  | -58.7  | -60.3   | -56.3  |
| 95: CH2FC    | 78.8 <sup>a</sup>   | 65.1   | 64.1    | 65.8   | 66.5   | 64.8    | 66.0   |
| 96: CHF2C    | 36.1 <sup>a</sup>   | 22.0   | 21.0    | 21.6   | 25.3   | 23.6    | 24.3   |
| 97: CF3C     | -18.4 <sup>a</sup>  | -26.5  | -27.6   | -30.0  | -21.9  | -23.7   | -23.3  |
| 99: HCCF     | 24.8 <sup>a</sup>   | 26.9   | 26.2    | 26.8   | 23.9   | 22.9    | 24.1   |
| 100: FCCF    | 0.0 <sup>a</sup>    | 4.4    | 3.8     | 3.9    | -2.6   | -3.7    | -3.8   |
| 102: CHFC    | 71.5 <sup>a</sup>   | 58.6   | 57.8    | 59.1   | 61.0   | 59.8    | 61.2   |
| 103: CF2C    | 30.4 <sup>a</sup>   | 22.2   | 21.4    | 22.1   | 26.5   | 25.3    | 26.7   |
| 105: CCF     | 109.3 <sup>a</sup>  | 94.0   | 93.5    | 95.7   | 97.7   | 96.9    | 101.0  |
| 107: CHF2CO  | -38.8 <sup>a</sup>  | -37.8  | -38.8   | -38.6  | -42.5  | -44.1   | -42.5  |
| 108: CF2CO   | -75.0 <sup>a</sup>  | -96.6  | -97.7   | -95.5  | -93.5  | -95.3   | -88.3  |
| 110: CF3C    | 19.3 <sup>a</sup>   | -7.8   | -8.5    | -5.8   | -7.3   | -8.6    | -2.2   |
| 112: CH2FCHO | -80.2 <sup>a</sup>  | -87.8  | -89.4   | -86.6  | -87.8  | -90.5   | -88.9  |
| 113: CHF2CHO | -130.4 <sup>a</sup> | -135.7 | -137.5  | -135.7 | -133.6 | -136.4  | -135.0 |
| 114: CF3CHO  | -186.5 <sup>a</sup> | -188.1 | -189.9  | -191.3 | -186.3 | -189.2  | -187.7 |
| 115: CH3CFO  | -105.8 <sup>a</sup> | -100.0 | -101.6  | -100.2 | -103.0 | -105.7  | -104.4 |
| 116: CH2FCFO | -143.6 <sup>a</sup> | -139.2 | -140.9  | -138.0 | -139.7 | -142.4  | -141.6 |
| 117: CHF2CFO | -190.7 <sup>a</sup> | -187.1 | -188.9  | -186.7 | -186.2 | -189.0  | -187.6 |
| 118: CF3CFO  | -246.3 <sup>a</sup> | -238.5 | -240.3  | -241.8 | -237.3 | -240.3  | -239.3 |
| 120: CH2FCO  | -41.9 <sup>a</sup>  | -57.4  | -58.7   | -55.1  | -58.7  | -60.9   | -56.6  |
| 121: CHF2CO  | -90.3 <sup>a</sup>  | -105.9 | -107.2  | -104.2 | -105.7 | -107.9  | -103.4 |
| 122: CF3CO   | -145.6 <sup>a</sup> | -158.3 | -159.7  | -159.6 | -157.5 | -159.8  | -155.1 |
| 125: C3F6    | -277.6 <sup>a</sup> | -272.8 | -275.6  | -276.8 | -269.4 | -273.8  | -270.3 |

a N.L.Haworth, M.H.Smith, G.B.Bacskay, and J.C.Mackie, J.Phys.Chem.A 104, 7600 (2000).

Table S24: Benchmark Results for the G2 Subset of the G2G3-CHNOF Set. Heats of Formation (kcal/mol)

| Species                                             | Ref.                | OM2    | OM2-D3T | ODM2   | OM3    | OM3-D3T | ODM3   |
|-----------------------------------------------------|---------------------|--------|---------|--------|--------|---------|--------|
| CH radical, doublet, C0v                            | 142.5 <sup>a</sup>  | 140.0  | 139.9   | 136.0  | 138.1  | 137.9   | 134.7  |
| Triplet methylene (CH2), C2v, 3-B1                  | 93.7 <sup>a</sup>   | 91.9   | 91.6    | 89.6   | 90.3   | 89.8    | 88.7   |
| Singlet methylene (CH2), C2v, 1-A1                  | 102.8 <sup>a</sup>  | 103.9  | 103.7   | 98.4   | 101.3  | 100.8   | 96.9   |
| Methyl radical (CH3), D3h                           | 35.0 <sup>a</sup>   | 33.7   | 33.3    | 31.8   | 35.2   | 34.5    | 32.3   |
| Methane (CH4), Td                                   | -17.9 <sup>a</sup>  | -19.3  | -19.9   | -19.3  | -18.0  | -19.1   | -17.8  |
| NH, triplet, C0v                                    | 85.2 <sup>a</sup>   | 85.4   | 85.3    | 80.7   | 79.8   | 79.6    | 76.2   |
| NH2 radical, C2v, 2-B1                              | 45.1 <sup>a</sup>   | 47.8   | 47.5    | 41.1   | 39.3   | 38.9    | 35.4   |
| Ammonia (NH3), C3v                                  | -11.0 <sup>a</sup>  | -5.9   | -6.3    | -12.0  | -11.2  | -12.0   | -11.3  |
| OH radical, C0v                                     | 9.4 <sup>a</sup>    | 5.3    | 5.3     | 4.0    | 4.3    | 4.2     | 3.1    |
| Water (H2O), C2v                                    | -57.8 <sup>a</sup>  | -56.5  | -56.7   | -58.9  | -58.5  | -58.8   | -58.0  |
| Hydrogen fluoride (HF), C0v                         | -65.1 <sup>a</sup>  | -63.3  | -63.4   | -68.6  | -64.9  | -65.0   | -65.2  |
| Acetylene (C2H2), D0h                               | 54.2 <sup>a</sup>   | 54.2   | 53.6    | 53.9   | 54.7   | 53.7    | 54.2   |
| Ethylene (H2C=CH2), D2h                             | 12.5 <sup>a</sup>   | 12.9   | 11.7    | 12.9   | 13.9   | 12.0    | 13.7   |
| Ethane (H3C-CH3), D3d                               | -20.1 <sup>a</sup>  | -21.2  | -23.0   | -20.8  | -20.8  | -23.6   | -20.0  |
| Cyano radical (CN), C0v, 2-Sigma+                   | 104.9 <sup>a</sup>  | 111.6  | 111.4   | 109.8  | 102.7  | 102.3   | 101.1  |
| Hydrogen cyanide (HCN), C0v                         | 31.5 <sup>a</sup>   | 26.1   | 25.7    | 25.5   | 25.3   | 24.7    | 25.4   |
| Carbon monoxide (CO), C0v                           | -26.4 <sup>a</sup>  | -20.3  | -20.5   | -19.3  | -21.5  | -21.8   | -17.5  |
| HCO radical, bent, Cs                               | 10.0 <sup>a</sup>   | 0.1    | -0.3    | -0.2   | -4.4   | -4.9    | -3.1   |
| Formaldehyde (H2C=O), C2v                           | -26.0 <sup>a</sup>  | -30.3  | -30.9   | -30.0  | -31.9  | -32.8   | -32.3  |
| Methanol (CH3-OH), Cs                               | -48.0 <sup>a</sup>  | -49.3  | -50.3   | -50.1  | -49.8  | -51.4   | -49.7  |
| N2 molecule, D0h                                    | 0.0 <sup>a</sup>    | 2.8    | 2.6     | 1.5    | 2.6    | 2.2     | 4.6    |
| Hydrazine (H2N-NH2), C2                             | 22.8 <sup>a</sup>   | 18.5   | 17.4    | 17.6   | 16.5   | 14.7    | 16.6   |
| NO radical, C0v, 2-Pi                               | 21.6 <sup>a</sup>   | 24.5   | 24.4    | 24.1   | 15.2   | 14.9    | 15.6   |
| O2 molecule, D0h, triplet                           | 0.0 <sup>a</sup>    | 2.0    | 1.9     | 3.9    | -2.6   | -2.8    | 0.4    |
| Hydrogen peroxide (HO-OH), C2                       | -32.5 <sup>a</sup>  | -35.3  | -35.8   | -34.8  | -36.9  | -37.6   | -36.0  |
| F2 molecule, D0h                                    | 0.0 <sup>a</sup>    | 0.6    | 0.5     | -0.9   | -1.7   | -1.8    | -1.3   |
| Carbon dioxide (CO2), D0h                           | -94.1 <sup>a</sup>  | -80.5  | -80.9   | -81.8  | -87.7  | -88.4   | -89.4  |
| CF4, Td                                             | -223.0 <sup>a</sup> | -220.5 | -221.4  | -227.1 | -215.8 | -217.3  | -216.8 |
| COF2, C2v                                           | -152.7 <sup>a</sup> | -136.5 | -137.1  | -137.9 | -138.7 | -139.7  | -141.0 |
| N2O, Cs                                             | 19.6 <sup>a</sup>   | 21.2   | 20.8    | 19.5   | 20.7   | 19.9    | 20.9   |
| NF3, C3v                                            | -31.6 <sup>a</sup>  | -30.1  | -30.7   | -26.5  | -35.9  | -36.9   | -37.1  |
| O3 (ozone), C2v                                     | 34.1 <sup>a</sup>   | 37.9   | 37.5    | 39.7   | 48.7   | 48.1    | 52.8   |
| F2O, C2v                                            | 5.9 <sup>a</sup>    | 5.3    | 5.1     | 7.0    | 7.2    | 6.7     | 8.1    |
| C2F4 (F2C=CF2), D2h                                 | -157.4 <sup>a</sup> | -156.3 | -157.7  | -158.2 | -155.9 | -158.2  | -156.5 |
| CF3CN, C3v                                          | -118.4 <sup>a</sup> | -125.5 | -127.0  | -127.8 | -125.1 | -127.5  | -123.5 |
| Propyne (C3H4), C3v                                 | 44.2 <sup>a</sup>   | 44.5   | 42.9    | 44.3   | 44.1   | 41.5    | 44.3   |
| Allene (C3H4), D2d                                  | 45.5 <sup>a</sup>   | 45.9   | 44.3    | 45.7   | 45.5   | 42.9    | 45.7   |
| Cyclopropene (C3H4), C2v                            | 66.2 <sup>a</sup>   | 67.4   | 65.7    | 66.9   | 65.5   | 62.8    | 65.6   |
| Propene (C3H6), Cs                                  | 4.8 <sup>a</sup>    | 4.7    | 2.3     | 4.8    | 5.0    | 1.1     | 5.0    |
| Cyclopropane (C3H6), D3h                            | 12.7 <sup>a</sup>   | 9.9    | 7.6     | 10.7   | 10.1   | 6.3     | 11.9   |
| Propane (C3H8), C2v                                 | -25.0 <sup>a</sup>  | -25.5  | -28.7   | -25.2  | -25.4  | -30.4   | -24.8  |
| Trans-1,3-butadiene (C4H6), C2h                     | 26.3 <sup>a</sup>   | 29.4   | 26.3    | 29.3   | 30.3   | 25.5    | 29.8   |
| 2-Butyne (C4H6), D3h, eclipsed                      | 34.8 <sup>a</sup>   | 35.1   | 32.4    | 35.1   | 33.8   | 29.6    | 34.6   |
| Methylenecyclopropane (C4H6), C2v                   | 47.9 <sup>a</sup>   | 45.0   | 42.0    | 45.4   | 43.7   | 39.1    | 44.7   |
| Bicyclo[1.1.0]butane (C4H6), C2v                    | 51.9 <sup>a</sup>   | 62.0   | 59.0    | 61.7   | 59.9   | 55.2    | 61.4   |
| Cyclobutene (C4H6), C2v                             | 37.4 <sup>a</sup>   | 41.3   | 38.2    | 40.2   | 40.8   | 35.8    | 40.0   |
| Cyclobutane (C4H8), D2d                             | 6.8 <sup>a</sup>    | 3.0    | -1.0    | 2.4    | 2.9    | -3.3    | 3.3    |
| Isobutene (C4H8), C2v                               | -4.0 <sup>a</sup>   | -4.3   | -8.2    | -4.0   | -3.9   | -10.0   | -3.6   |
| Trans-butane (C4H10), C2h                           | -30.0 <sup>a</sup>  | -30.1  | -34.8   | -29.9  | -30.3  | -37.5   | -29.8  |
| Isobutane (C4H10), C3v                              | -32.1 <sup>a</sup>  | -31.8  | -36.7   | -31.9  | -31.3  | -38.8   | -31.1  |
| Spiropentane (C5H8), D2d                            | 44.3 <sup>a</sup>   | 42.8   | 38.4    | 43.6   | 41.0   | 34.3    | 42.7   |
| Benzene (C6H6), D6h                                 | 19.7 <sup>a</sup>   | 18.8   | 13.8    | 19.7   | 18.5   | 10.6    | 18.9   |
| Difluoromethane (H2CF2), C2v                        | -107.7 <sup>a</sup> | -110.9 | -111.6  | -109.4 | -106.6 | -107.8  | -107.1 |
| Trifluoromethane (HCF3), C3v                        | -166.6 <sup>a</sup> | -166.8 | -167.6  | -168.0 | -162.0 | -163.3  | -162.4 |
| Methylamine (H3C-NH2), Cs                           | -5.5 <sup>a</sup>   | -4.1   | -5.6    | -6.3   | -5.8   | -8.1    | -5.6   |
| Acetonitrile (CH3-CN), C3v                          | 18.0 <sup>a</sup>   | 17.5   | 16.2    | 17.3   | 15.3   | 13.2    | 15.3   |
| Nitromethane (CH3-NO2), Cs                          | -17.8 <sup>a</sup>  | -17.3  | -19.1   | -17.0  | -15.7  | -18.5   | -13.5  |
| Methylnitrite (CH3-O-N=O), NOCH trans, ONOC cis, Cs | -15.9 <sup>a</sup>  | -23.4  | -25.1   | -22.8  | -25.9  | -28.7   | -25.9  |
| Formic acid (HCOOH), HOCO cis, Cs                   | -90.5 <sup>a</sup>  | -86.9  | -87.8   | -88.0  | -88.2  | -89.7   | -89.6  |
| Methyl formate (HCOOCH3), OCOC cis, Cs              | -85.0 <sup>a</sup>  | -81.4  | -83.5   | -82.1  | -79.4  | -82.6   | -82.1  |
| Acetamide (CH3CONH2), C1                            | -57.0 <sup>a</sup>  | -50.7  | -53.2   | -55.6  | -57.4  | -61.4   | -59.1  |
| Aziridine (cyclic CH2-NH-CH2 ring), Cs              | 30.2 <sup>a</sup>   | 36.3   | 34.3    | 36.0   | 35.4   | 32.3    | 38.0   |

... continued on next page ...

Table S24: ... continued from previous page ...

| Species                                                                              | Ref.                | OM2    | OM2-D3T | ODM2   | OM3    | OM3-D3T | ODM3   |
|--------------------------------------------------------------------------------------|---------------------|--------|---------|--------|--------|---------|--------|
| Cyanogen (NCCN), D0h                                                                 | 73.3 <sup>a</sup>   | 74.8   | 73.9    | 76.2   | 68.2   | 66.7    | 70.5   |
| Dimethylamine, (CH <sub>3</sub> ) <sub>2</sub> NH, Cs                                | -4.4 <sup>a</sup>   | -5.1   | -7.9    | -4.2   | -2.2   | -6.5    | -3.2   |
| Trans-ethylamine (CH <sub>3</sub> -CH <sub>2</sub> -NH <sub>2</sub> ), Cs            | -11.3 <sup>a</sup>  | -8.9   | -11.7   | -10.9  | -12.1  | -16.5   | -11.9  |
| Ketene (H <sub>2</sub> C=C=O), C <sub>2v</sub>                                       | -11.4 <sup>a</sup>  | -5.1   | -6.1    | -6.5   | -11.0  | -12.6   | -10.9  |
| Oxirane (cyclic CH <sub>2</sub> -O-CH <sub>2</sub> ), C <sub>2v</sub>                | -12.6 <sup>a</sup>  | -13.3  | -14.8   | -10.1  | -8.8   | -11.2   | -5.1   |
| Acetaldehyde (CH <sub>3</sub> CHO), Cs                                               | -39.7 <sup>a</sup>  | -44.2  | -45.8   | -44.1  | -46.5  | -49.1   | -46.7  |
| Glyoxal (O=CH-CH=O), trans, C <sub>2h</sub>                                          | -50.7 <sup>a</sup>  | -59.1  | -60.6   | -58.5  | -61.8  | -64.2   | -62.6  |
| Ethanol (CH <sub>3</sub> CH <sub>2</sub> OH), trans, Cs                              | -56.2 <sup>a</sup>  | -56.9  | -59.1   | -56.7  | -57.2  | -60.8   | -56.6  |
| Dimethyl ether (CH <sub>3</sub> -O-CH <sub>3</sub> ), C <sub>2v</sub>                | -44.0 <sup>a</sup>  | -45.6  | -47.7   | -45.9  | -42.8  | -46.2   | -44.3  |
| Vinyl fluoride (H <sub>2</sub> C=CHF), Cs                                            | -33.2 <sup>a</sup>  | -32.3  | -33.5   | -31.7  | -32.2  | -34.1   | -32.6  |
| Acrylonitrile (H <sub>2</sub> C=CHCN), Cs                                            | 43.2 <sup>a</sup>   | 45.6   | 43.6    | 45.3   | 43.7   | 40.5    | 43.6   |
| Acetone (CH <sub>3</sub> -CO-CH <sub>3</sub> ), C <sub>2v</sub>                      | -51.9 <sup>a</sup>  | -57.4  | -60.4   | -57.8  | -59.3  | -63.9   | -59.3  |
| Acetic acid (CH <sub>3</sub> COOH), single bonds trans, Cs                           | -103.4 <sup>a</sup> | -101.0 | -103.0  | -102.2 | -102.7 | -106.0  | -103.8 |
| Acetyl fluoride (CH <sub>3</sub> COF), HCCO cis, Cs                                  | -105.7 <sup>a</sup> | -100.0 | -101.6  | -100.2 | -103.0 | -105.7  | -104.4 |
| Isopropanol, (CH <sub>3</sub> ) <sub>2</sub> CH-OH, gauche isomer, C <sub>1</sub>    | -65.2 <sup>a</sup>  | -66.3  | -70.1   | -67.0  | -66.6  | -72.5   | -66.5  |
| Methyl ethyl ether (CH <sub>3</sub> -CH <sub>2</sub> -O-CH <sub>3</sub> ), trans, Cs | -51.7 <sup>a</sup>  | -53.4  | -56.8   | -53.0  | -50.6  | -56.0   | -51.9  |
| Trimethyl amine, (CH <sub>3</sub> ) <sub>3</sub> N, C <sub>3v</sub>                  | -5.7 <sup>a</sup>   | -8.0   | -12.4   | -4.5   | -0.1   | -6.7    | -2.9   |
| Furan (cyclic C <sub>4</sub> H <sub>4</sub> O), C <sub>2v</sub>                      | -8.3 <sup>a</sup>   | -2.9   | -5.9    | -3.4   | -2.7   | -7.4    | -2.2   |
| Pyrrole (planar cyclic C <sub>4</sub> H <sub>4</sub> NH), C <sub>2v</sub>            | 25.9 <sup>a</sup>   | 33.7   | 30.2    | 35.6   | 32.0   | 26.3    | 33.9   |
| Pyridine (cyclic C <sub>5</sub> H <sub>5</sub> N), C <sub>2v</sub>                   | 33.6 <sup>a</sup>   | 30.8   | 26.3    | 33.5   | 29.4   | 22.3    | 31.8   |
| H <sub>2</sub> molecule, D <sub>0h</sub>                                             | 0.0 <sup>a</sup>    | -3.4   | -3.5    | -0.1   | -0.0   | -0.1    | 0.0    |
| CCH radical, C <sub>0v</sub>                                                         | 135.1 <sup>a</sup>  | 139.6  | 139.1   | 149.2  | 141.1  | 140.4   | 141.9  |
| C <sub>2</sub> H <sub>3</sub> radical, Cs, 2-A'                                      | 71.6 <sup>a</sup>   | 67.4   | 66.6    | 66.5   | 66.4   | 64.9    | 66.1   |
| CH <sub>3</sub> CO radical, HCCO cis, Cs, 2-A'                                       | -2.4 <sup>a</sup>   | -16.0  | -17.2   | -15.3  | -19.9  | -21.9   | -17.6  |
| H <sub>2</sub> COH radical, C <sub>1</sub>                                           | -4.1 <sup>a</sup>   | -10.8  | -11.5   | -11.7  | -12.2  | -13.5   | -11.3  |
| CH <sub>3</sub> O radical, Cs, 2-A'                                                  | 4.1 <sup>a</sup>    | 0.4    | -0.4    | 1.3    | 1.3    | -0.0    | 1.7    |
| CH <sub>3</sub> CH <sub>2</sub> O radical, Cs, 2-A''                                 | -3.7 <sup>a</sup>   | -5.6   | -7.6    | -6.4   | -5.2   | -8.3    | -6.4   |
| C <sub>2</sub> H <sub>5</sub> radical, staggered, Cs, 2-A'                           | 28.9 <sup>a</sup>   | 24.8   | 23.3    | 23.9   | 24.6   | 22.3    | 23.7   |
| (CH <sub>3</sub> ) <sub>2</sub> CH radical, Cs, 2-A'                                 | 21.5 <sup>a</sup>   | 14.3   | 11.6    | 14.1   | 13.4   | 9.0     | 13.2   |
| t-Butyl radical, (CH <sub>3</sub> ) <sub>3</sub> C, C <sub>3v</sub>                  | 12.3 <sup>a</sup>   | 3.2    | -1.1    | 3.6    | 2.4    | -4.2    | 2.9    |
| NO <sub>2</sub> radical, C <sub>2v</sub> , 2-A1                                      | 7.9 <sup>a</sup>    | 5.1    | 4.7     | 3.5    | -1.5   | -2.2    | -1.3   |

a L.A.Curtiss, K.Raghavachari, P.C.Redfern, and J.A.Pople, J.Chem.Phys. 106, 1063 (1997).

Table S25: Benchmark Results for the G3 Subset of the G2G3-CHNOF Set. Heats of Formation (kcal/mol)

| Species                               | Ref.                | OM2    | OM2-D3T | ODM2   | OM3    | OM3-D3T | ODM3   |
|---------------------------------------|---------------------|--------|---------|--------|--------|---------|--------|
| Methylallene C1                       | 38.8 <sup>a</sup>   | 38.1   | 35.2    | 38.1   | 37.6   | 33.0    | 38.0   |
| C5H8 (Isoprene) C1                    | 18.0 <sup>a</sup>   | 21.4   | 16.6    | 21.7   | 22.6   | 15.2    | 21.9   |
| Cyclopentane twist C2v                | -18.3 <sup>a</sup>  | -19.7  | -25.5   | -19.3  | -20.8  | -29.8   | -19.7  |
| n-Pentane C2v                         | -35.1 <sup>a</sup>  | -34.7  | -40.8   | -34.7  | -35.2  | -44.6   | -34.9  |
| Neopentane Td                         | -40.2 <sup>a</sup>  | -39.6  | -46.4   | -40.2  | -37.6  | -48.1   | -38.2  |
| 1,3-Cyclohexadiene C2                 | 25.4 <sup>a</sup>   | 25.9   | 20.0    | 26.5   | 24.8   | 15.6    | 24.9   |
| 1,4-Cyclohexadiene D2h                | 25.0 <sup>a</sup>   | 26.8   | 21.0    | 26.8   | 24.8   | 15.8    | 24.6   |
| Cyclohexane chair D3d                 | -29.5 <sup>a</sup>  | -27.1  | -35.0   | -27.2  | -28.5  | -40.5   | -28.5  |
| n-Hexane C2h                          | -39.9 <sup>a</sup>  | -39.2  | -46.9   | -39.4  | -40.0  | -51.6   | -39.9  |
| 3-Methylpentane Cs                    | -41.1 <sup>a</sup>  | -39.9  | -48.2   | -40.2  | -39.5  | -52.0   | -39.9  |
| Toluene stag Cs                       | 12.0 <sup>a</sup>   | 9.5    | 2.9     | 10.3   | 9.6    | -0.6    | 9.3    |
| n-Heptane C2v                         | -44.9 <sup>a</sup>  | -43.8  | -53.0   | -44.2  | -44.8  | -58.7   | -45.0  |
| Cyclooctatetraene C2v                 | 70.7 <sup>a</sup>   | 75.2   | 67.2    | 74.3   | 73.9   | 61.6    | 72.1   |
| n-Octane C2h                          | -49.9 <sup>a</sup>  | -48.3  | -59.0   | -48.9  | -49.7  | -65.8   | -50.1  |
| Naphthalene D2h                       | 35.9 <sup>a</sup>   | 34.8   | 25.3    | 35.8   | 35.7   | 21.0    | 35.7   |
| Azulene Cs                            | 69.1 <sup>a</sup>   | 83.4   | 74.0    | 82.7   | 82.5   | 68.1    | 81.6   |
| Z-Methylacetate Cs                    | -98.4 <sup>a</sup>  | -95.6  | -98.8   | -96.7  | -93.8  | -99.0   | -96.7  |
| tert-Butanol Cs                       | -74.7 <sup>a</sup>  | -76.8  | -82.4   | -78.1  | -75.9  | -84.5   | -76.1  |
| Anilin Cs                             | 20.8 <sup>a</sup>   | 25.2   | 19.0    | 22.0   | 22.3   | 12.7    | 22.0   |
| Phenol (planar) Cs                    | -23.0 <sup>a</sup>  | -21.7  | -27.2   | -22.4  | -23.6  | -32.3   | -23.2  |
| Divinylether Cs                       | -3.3 <sup>a</sup>   | 4.5    | 1.2     | 3.9    | 4.6    | -0.6    | 2.9    |
| Tetrahydrofuran C2                    | -44.0 <sup>a</sup>  | -47.9  | -52.5   | -48.9  | -46.3  | -53.5   | -47.3  |
| Cyclopentanone C2                     | -45.9 <sup>a</sup>  | -55.0  | -60.6   | -54.7  | -57.5  | -66.1   | -56.9  |
| Benzoquinone D2h                      | -29.4 <sup>a</sup>  | -32.5  | -37.9   | -31.6  | -32.9  | -41.3   | -32.0  |
| Pyrimidine C2v                        | 46.8 <sup>a</sup>   | 44.5   | 40.4    | 48.0   | 41.9   | 35.4    | 43.8   |
| N=C-CH2-CH2-C≡N 1,2-Dicyanoethane C2h | 50.1 <sup>a</sup>   | 47.7   | 44.0    | 47.3   | 43.4   | 37.7    | 43.4   |
| Pyrazin D2h                           | 46.9 <sup>a</sup>   | 44.9   | 40.9    | 50.0   | 42.0   | 35.5    | 47.8   |
| CH3-C(=O)-C≡CH (Acetylacetylene) Cs   | 15.6 <sup>a</sup>   | 11.2   | 8.5     | 10.9   | 9.8    | 5.5     | 10.2   |
| CH3-CH=CH-CHO (Crotonaldehyd) Cs      | -24.0 <sup>a</sup>  | -27.9  | -31.5   | -27.9  | -29.5  | -35.1   | -30.0  |
| Acetic anhydride C2                   | -136.8 <sup>a</sup> | -139.5 | -143.9  | -139.7 | -138.8 | -145.7  | -142.3 |
| (CH3)2CH-CN (Isobutanenitrile) Cs     | 5.6 <sup>a</sup>    | 5.1    | 0.8     | 4.6    | 3.5    | -3.1    | 3.6    |
| Methylethylketone Cs                  | -57.1 <sup>a</sup>  | -61.8  | -66.2   | -62.7  | -63.4  | -70.3   | -64.0  |
| 2-Methylpropionaldehyde Cs            | -51.6 <sup>a</sup>  | -56.0  | -60.7   | -56.2  | -57.1  | -64.3   | -57.5  |
| 1,4-Dioxane C2h                       | -75.5 <sup>a</sup>  | -76.5  | -81.8   | -79.3  | -72.4  | -80.5   | -76.3  |
| Tetrahydropyrrole Cs                  | -0.8 <sup>a</sup>   | 0.8    | -4.4    | -0.7   | 1.5    | -6.6    | -0.3   |
| Nitro-s-butane C1                     | -39.1 <sup>a</sup>  | -36.2  | -42.9   | -38.0  | -34.8  | -44.9   | -33.7  |
| Diethylether C2v                      | -60.3 <sup>a</sup>  | -61.1  | -65.9   | -60.2  | -58.4  | -65.7   | -59.4  |
| CH3-CH(OCH3)2 (Acetal) C1             | -93.1 <sup>a</sup>  | -96.4  | -102.2  | -97.6  | -88.7  | -97.5   | -93.1  |
| t-Butylamine Cs                       | -28.9 <sup>a</sup>  | -22.3  | -28.7   | -27.4  | -24.6  | -34.3   | -25.6  |
| N-Methylpyrrole Cs                    | 24.6 <sup>a</sup>   | 31.1   | 26.0    | 36.4   | 33.5   | 25.6    | 34.2   |
| Tetrahydropyran Cs                    | -53.4 <sup>a</sup>  | -53.1  | -59.6   | -54.5  | -51.7  | -61.8   | -53.8  |
| Diethylketone C2v                     | -61.6 <sup>a</sup>  | -66.0  | -71.9   | -66.9  | -67.5  | -76.7   | -67.9  |
| Isopropylacetate C1                   | -115.1 <sup>a</sup> | -113.7 | -120.2  | -114.2 | -111.3 | -121.1  | -113.8 |
| Perhydropyridine (Piperidine) Cs      | -11.3 <sup>a</sup>  | -6.7   | -14.1   | -5.7   | -7.2   | -18.5   | -8.2   |
| t-Butylmethylether Cs                 | -67.8 <sup>a</sup>  | -70.5  | -77.9   | -72.0  | -66.1  | -77.2   | -68.3  |
| 1,3-Difluorobenzene C2v               | -73.9 <sup>a</sup>  | -72.9  | -78.0   | -72.5  | -74.0  | -82.0   | -74.0  |
| 1,4-Difluorobenzene D2h               | -73.3 <sup>a</sup>  | -72.6  | -77.6   | -72.2  | -73.5  | -81.5   | -73.8  |
| Fluorobenzene C2v                     | -27.7 <sup>a</sup>  | -27.3  | -32.3   | -26.7  | -28.0  | -35.9   | -27.9  |
| Diisopropylether C2                   | -76.3 <sup>a</sup>  | -77.7  | -86.2   | -78.1  | -74.1  | -86.8   | -76.2  |
| C2F6 D3d                              | -321.3 <sup>a</sup> | -317.5 | -319.7  | -323.8 | -310.5 | -314.0  | -311.6 |
| CF3 C2v                               | -111.3 <sup>a</sup> | -123.2 | -123.8  | -124.1 | -122.6 | -123.6  | -120.0 |
| Phenyl radical C2v                    | 81.2 <sup>a</sup>   | 71.5   | 67.0    | 72.9   | 70.4   | 63.2    | 72.4   |

<sup>a</sup> G3 values derived from the data in: L.A.Curtiss, K.Raghavachari, P.C.Redfern, V.Rassolov, and J.A.Pople, J.Chem.Phys. 112, 7374 (2000).

Table S26: Benchmark Results for the ALKANES28 Subset of the G2G3-CHNOF Set. Heats of Formation (kcal/mol)

| Species         | Ref.               | OM2   | OM2-D3T | ODM2  | OM3   | OM3-D3T | ODM3  |
|-----------------|--------------------|-------|---------|-------|-------|---------|-------|
| Methane         | -17.8 <sup>a</sup> | -19.3 | -19.9   | -19.3 | -18.0 | -19.1   | -17.8 |
| Ethane          | -20.0 <sup>a</sup> | -21.2 | -23.0   | -20.8 | -20.8 | -23.6   | -20.0 |
| Propane         | -25.0 <sup>a</sup> | -25.5 | -28.7   | -25.2 | -25.4 | -30.4   | -24.8 |
| n-Butane        | -30.0 <sup>a</sup> | -30.1 | -34.8   | -29.9 | -30.3 | -37.5   | -29.8 |
| n-Pentane       | -35.1 <sup>a</sup> | -34.7 | -40.8   | -34.7 | -35.2 | -44.6   | -34.9 |
| n-Hexane        | -39.9 <sup>a</sup> | -39.2 | -46.9   | -39.4 | -40.0 | -51.6   | -39.9 |
| n-Heptane       | -44.9 <sup>a</sup> | -43.8 | -53.0   | -44.2 | -44.8 | -58.7   | -45.0 |
| n-Octane        | -49.9 <sup>a</sup> | -48.3 | -59.0   | -48.9 | -49.7 | -65.8   | -50.1 |
| n-Nonane        | -54.5 <sup>a</sup> | -52.9 | -65.1   | -53.7 | -54.5 | -72.9   | -55.1 |
| n-Decane        | -59.6 <sup>a</sup> | -57.5 | -71.2   | -58.4 | -59.3 | -79.9   | -60.2 |
| n-Undecane      | -64.8 <sup>a</sup> | -62.0 | -77.3   | -63.2 | -64.2 | -87.0   | -65.3 |
| n-Dodecane      | -69.2 <sup>a</sup> | -66.6 | -83.4   | -67.9 | -69.0 | -94.1   | -70.4 |
| n-Tridecane     | -74.5 <sup>b</sup> | -71.1 | -89.4   | -72.7 | -73.8 | -101.2  | -75.4 |
| n-Tetradecane   | -79.4 <sup>b</sup> | -75.7 | -95.5   | -77.4 | -78.7 | -108.3  | -80.5 |
| n-Pentadecane   | -84.8 <sup>b</sup> | -80.3 | -101.6  | -82.1 | -83.5 | -115.3  | -85.6 |
| n-Hexadecane    | -89.6 <sup>a</sup> | -84.8 | -107.7  | -86.9 | -88.4 | -122.4  | -90.6 |
| 2-Methylpropane | -32.1 <sup>a</sup> | -31.8 | -36.7   | -31.9 | -31.3 | -38.8   | -31.1 |
| 2-Methylbutane  | -36.7 <sup>a</sup> | -35.9 | -42.4   | -36.1 | -35.5 | -45.4   | -35.5 |
| 2-Methylpentane | -41.8 <sup>a</sup> | -40.4 | -48.5   | -40.9 | -40.3 | -52.5   | -40.6 |
| 2-Methylhexane  | -46.5 <sup>a</sup> | -45.0 | -54.6   | -45.6 | -45.1 | -59.6   | -45.7 |
| 2-Methylheptane | -51.5 <sup>a</sup> | -49.5 | -60.7   | -50.4 | -50.0 | -66.7   | -50.8 |
| 2-Methylnonane  | -62.1 <sup>a</sup> | -58.7 | -72.9   | -59.9 | -59.6 | -80.9   | -61.0 |

a J.B.Pedley, R.D.Naylor, and S.P.Kirby, "Thermochemical Data of Organic Compounds", 2nd ed., Chapman and Hall, London, 1986. b P.C.Redfern, P.Zapol, L.A.Curtiss, and K.Raghavachari, J.Phys.Chem.A 104, 5850 (2000).

Table S27: Benchmark Results for the ALKANES28 Subset of the G2G3-CHNOF Set. Enthalpy Changes at 298 K (kcal/mol)

| Species         | Ref.              | OM2  | OM2-D3T | ODM2 | OM3  | OM3-D3T | ODM3 |
|-----------------|-------------------|------|---------|------|------|---------|------|
| 2-Methylpropane | -2.1 <sup>a</sup> | -1.7 | -1.9    | -1.9 | -1.0 | -1.3    | -1.3 |
| 2-Methylbutane  | -1.6 <sup>a</sup> | -1.2 | -1.6    | -1.4 | -0.3 | -0.9    | -0.7 |
| 2-Methylpentane | -1.8 <sup>a</sup> | -1.2 | -1.7    | -1.5 | -0.3 | -0.9    | -0.7 |
| 2-Methylhexane  | -1.6 <sup>a</sup> | -1.2 | -1.7    | -1.5 | -0.3 | -0.9    | -0.7 |
| 2-Methylheptane | -1.6 <sup>a</sup> | -1.2 | -1.7    | -1.5 | -0.3 | -0.9    | -0.7 |
| 2-Methylnonane  | -2.5 <sup>a</sup> | -1.2 | -1.7    | -1.5 | -0.3 | -0.9    | -0.7 |

<sup>a</sup> J.B.Pedley, R.D.Naylor, and S.P.Kirby, "Thermochemical Data of Organic Compounds", 2nd ed., Chapman and Hall, London, 1986.

Table S28: Benchmark Results for the TAE140 Subset of the W4-11-CHNOF Set. Atomization Energies at 0 K (kcal/mol)

| Species                                                                             | Ref.                | OM2   | OM2-D3T | ODM2   | OM3   | OM3-D3T | ODM3   |
|-------------------------------------------------------------------------------------|---------------------|-------|---------|--------|-------|---------|--------|
| The OM $x$ and OM $x$ -D3T energies are uncorrected atomization enthalpies at 298 K |                     |       |         |        |       |         |        |
| h2                                                                                  | 109.5 <sup>a</sup>  | 106.3 | 106.4   | 108.2  | 104.0 | 104.1   | 109.1  |
| ch2-trip                                                                            | 190.7 <sup>a</sup>  | 182.9 | 183.1   | 194.3  | 184.8 | 185.2   | 195.3  |
| ch3                                                                                 | 307.9 <sup>a</sup>  | 293.3 | 293.7   | 310.6  | 291.9 | 292.7   | 309.3  |
| ch4                                                                                 | 420.4 <sup>a</sup>  | 398.5 | 399.2   | 422.7  | 397.3 | 398.4   | 420.8  |
| c2h6                                                                                | 713.1 <sup>a</sup>  | 674.8 | 676.6   | 713.4  | 674.4 | 677.3   | 712.0  |
| propane                                                                             | 1007.9 <sup>a</sup> | 953.8 | 957.0   | 1007.2 | 953.7 | 958.7   | 1005.8 |
| ch2-sing                                                                            | 181.5 <sup>a</sup>  | 170.2 | 170.5   | 184.4  | 172.6 | 173.1   | 185.5  |
| ch                                                                                  | 84.2 <sup>a</sup>   | 82.8  | 82.9    | 90.3   | 84.6  | 84.8    | 91.5   |
| c2h5f                                                                               | 721.5 <sup>a</sup>  | 687.5 | 689.3   | 721.0  | 685.1 | 688.1   | 719.7  |
| ch3nh2                                                                              | 582.3 <sup>a</sup>  | 546.8 | 548.2   | 582.2  | 547.3 | 549.7   | 580.2  |
| ch3f                                                                                | 423.0 <sup>a</sup>  | 405.8 | 406.5   | 424.3  | 402.2 | 403.3   | 422.8  |
| propene                                                                             | 861.6 <sup>a</sup>  | 819.9 | 822.3   | 861.0  | 819.6 | 823.4   | 860.2  |
| nh3                                                                                 | 298.0 <sup>a</sup>  | 273.1 | 273.6   | 296.6  | 278.0 | 278.7   | 296.5  |
| ethanol                                                                             | 811.2 <sup>a</sup>  | 768.1 | 770.3   | 808.5  | 767.7 | 771.3   | 807.3  |
| ch3nh                                                                               | 474.6 <sup>a</sup>  | 449.3 | 450.4   | 477.2  | 451.4 | 453.3   | 479.1  |
| c2h4                                                                                | 564.1 <sup>a</sup>  | 537.2 | 538.4   | 563.7  | 536.0 | 537.9   | 562.4  |
| methanol                                                                            | 513.5 <sup>a</sup>  | 486.3 | 487.3   | 512.8  | 485.9 | 487.6   | 511.7  |
| nh2                                                                                 | 182.6 <sup>a</sup>  | 169.2 | 169.5   | 185.7  | 176.6 | 177.1   | 191.0  |
| nh                                                                                  | 83.1 <sup>a</sup>   | 79.7  | 79.8    | 88.2   | 84.9  | 85.1    | 92.7   |
| ch2nh2                                                                              | 482.3 <sup>a</sup>  | 461.5 | 462.6   | 488.6  | 464.7 | 466.6   | 488.0  |
| h2o                                                                                 | 233.0 <sup>a</sup>  | 219.9 | 220.1   | 231.8  | 220.0 | 220.4   | 230.0  |
| hf                                                                                  | 141.6 <sup>a</sup>  | 132.6 | 132.6   | 144.0  | 135.2 | 135.3   | 139.9  |
| ch2ch                                                                               | 446.1 <sup>a</sup>  | 430.2 | 431.1   | 450.3  | 431.4 | 432.8   | 450.6  |
| oh                                                                                  | 107.2 <sup>a</sup>  | 106.1 | 106.2   | 111.1  | 106.5 | 106.6   | 112.0  |
| propyne                                                                             | 705.6 <sup>a</sup>  | 675.2 | 676.8   | 704.3  | 675.4 | 678.0   | 704.1  |
| acetaldehyde                                                                        | 677.9 <sup>a</sup>  | 652.8 | 654.4   | 681.3  | 654.9 | 657.5   | 683.8  |
| allene                                                                              | 704.1 <sup>a</sup>  | 675.2 | 676.8   | 703.9  | 675.5 | 678.1   | 703.7  |
| c2h3f                                                                               | 573.9 <sup>a</sup>  | 548.4 | 549.6   | 570.3  | 548.2 | 550.2   | 570.9  |
| oxirane                                                                             | 651.5 <sup>a</sup>  | 622.3 | 623.8   | 648.4  | 617.5 | 620.0   | 642.6  |
| ch2f2                                                                               | 437.7 <sup>a</sup>  | 420.5 | 421.3   | 435.4  | 416.4 | 417.7   | 433.1  |
| ch2c                                                                                | 359.9 <sup>a</sup>  | 359.7 | 360.4   | 373.5  | 359.4 | 360.5   | 371.5  |
| n2h4                                                                                | 438.3 <sup>a</sup>  | 408.8 | 409.9   | 439.4  | 411.0 | 412.9   | 439.9  |
| ch2nh                                                                               | 439.4 <sup>a</sup>  | 418.2 | 419.1   | 441.2  | 421.4 | 422.9   | 441.4  |
| acetic                                                                              | 804.0 <sup>a</sup>  | 768.3 | 770.4   | 799.1  | 767.9 | 771.2   | 799.4  |
| c2h2                                                                                | 405.5 <sup>a</sup>  | 390.9 | 391.5   | 405.5  | 390.5 | 391.5   | 405.5  |
| h2co                                                                                | 374.7 <sup>a</sup>  | 364.4 | 364.9   | 377.4  | 365.5 | 366.4   | 379.7  |
| h2cn                                                                                | 343.7 <sup>a</sup>  | 333.0 | 333.6   | 347.0  | 334.1 | 335.1   | 347.7  |
| t-hcoh                                                                              | 322.5 <sup>a</sup>  | 323.9 | 324.4   | 338.4  | 322.2 | 323.1   | 331.5  |
| c-hcoh                                                                              | 317.6 <sup>a</sup>  | 322.5 | 323.1   | 335.0  | 316.0 | 316.9   | 324.4  |
| ketene                                                                              | 533.5 <sup>a</sup>  | 508.8 | 509.8   | 525.8  | 514.1 | 515.7   | 530.6  |
| formic                                                                              | 501.9 <sup>a</sup>  | 477.6 | 478.5   | 494.6  | 477.0 | 478.5   | 495.1  |
| hcnh                                                                                | 336.2 <sup>a</sup>  | 326.1 | 326.7   | 343.1  | 334.6 | 335.6   | 348.2  |
| glyoxal                                                                             | 635.1 <sup>a</sup>  | 622.9 | 624.4   | 640.4  | 625.2 | 627.6   | 644.2  |
| hcof                                                                                | 403.7 <sup>a</sup>  | 383.9 | 384.5   | 392.7  | 385.9 | 386.9   | 398.0  |
| cf4                                                                                 | 478.8 <sup>a</sup>  | 463.5 | 464.4   | 478.9  | 461.3 | 462.8   | 468.9  |
| hccf                                                                                | 398.5 <sup>a</sup>  | 384.4 | 385.0   | 394.9  | 387.5 | 388.5   | 398.0  |
| hcn                                                                                 | 313.4 <sup>a</sup>  | 309.6 | 310.0   | 319.2  | 307.8 | 308.4   | 318.8  |
| hnc                                                                                 | 298.2 <sup>a</sup>  | 292.0 | 292.5   | 306.0  | 305.8 | 306.5   | 321.7  |
| cch                                                                                 | 266.2 <sup>a</sup>  | 254.0 | 254.4   | 263.1  | 256.5 | 257.2   | 263.4  |
| hco                                                                                 | 279.4 <sup>a</sup>  | 281.2 | 281.5   | 287.7  | 284.6 | 285.1   | 290.0  |
| co                                                                                  | 259.7 <sup>a</sup>  | 248.2 | 248.4   | 248.5  | 248.3 | 248.6   | 247.0  |
| oxirene                                                                             | 456.1 <sup>a</sup>  | 439.4 | 440.4   | 453.9  | 439.5 | 441.1   | 453.1  |
| f2co                                                                                | 420.6 <sup>a</sup>  | 400.9 | 401.5   | 408.1  | 403.5 | 404.5   | 412.4  |
| hocn                                                                                | 410.1 <sup>a</sup>  | 392.8 | 393.5   | 404.3  | 392.8 | 393.9   | 407.3  |
| hooh                                                                                | 269.1 <sup>a</sup>  | 254.6 | 255.0   | 266.3  | 253.8 | 254.6   | 265.6  |
| t-n2h2                                                                              | 296.5 <sup>a</sup>  | 286.3 | 286.9   | 303.6  | 298.6 | 299.7   | 309.4  |
| hnco                                                                                | 434.7 <sup>a</sup>  | 399.7 | 400.4   | 415.5  | 407.5 | 408.7   | 425.0  |
| c-n2h2                                                                              | 291.1 <sup>a</sup>  | 289.5 | 290.1   | 305.7  | 296.4 | 297.4   | 307.4  |
| cf2                                                                                 | 258.8 <sup>a</sup>  | 264.2 | 264.5   | 264.9  | 263.6 | 264.1   | 259.7  |
| co2                                                                                 | 390.1 <sup>a</sup>  | 366.5 | 366.9   | 372.1  | 372.6 | 373.3   | 380.9  |
| fccf                                                                                | 386.1 <sup>a</sup>  | 373.1 | 373.8   | 379.5  | 379.8 | 380.9   | 386.6  |

... continued on next page ...



Table S28: ... continued from previous page ...

| Species                                                                                                         | Ref.                | OM2    | OM2-D3T | ODM2   | OM3    | OM3-D3T | ODM3   |
|-----------------------------------------------------------------------------------------------------------------|---------------------|--------|---------|--------|--------|---------|--------|
| dioxirane                                                                                                       | 410.0 <sup>a</sup>  | 398.6  | 399.4   | 404.3  | 383.6  | 384.9   | 393.6  |
| cf                                                                                                              | 132.7 <sup>a</sup>  | 137.3  | 137.4   | 135.0  | 137.1  | 137.3   | 133.5  |
| nccn                                                                                                            | 502.0 <sup>a</sup>  | 492.5  | 493.5   | 499.9  | 493.1  | 494.7   | 504.0  |
| n2                                                                                                              | 228.5 <sup>a</sup>  | 223.2  | 223.4   | 227.5  | 213.6  | 214.0   | 222.8  |
| n2h                                                                                                             | 224.9 <sup>a</sup>  | 230.2  | 230.6   | 239.5  | 233.3  | 233.9   | 240.3  |
| hoo                                                                                                             | 175.5 <sup>a</sup>  | 173.4  | 173.6   | 178.4  | 170.2  | 170.6   | 174.9  |
| hcno                                                                                                            | 365.0 <sup>a</sup>  | 349.7  | 350.4   | 365.1  | 352.0  | 353.2   | 363.1  |
| honc                                                                                                            | 350.1 <sup>a</sup>  | 340.9  | 341.7   | 355.8  | 348.9  | 350.1   | 371.3  |
| hno                                                                                                             | 205.9 <sup>a</sup>  | 204.0  | 204.3   | 214.4  | 213.8  | 214.3   | 220.6  |
| hof                                                                                                             | 158.7 <sup>a</sup>  | 148.2  | 148.4   | 153.5  | 145.9  | 146.2   | 152.0  |
| c-hono                                                                                                          | 312.2 <sup>a</sup>  | 304.8  | 305.4   | 316.4  | 309.1  | 310.2   | 319.6  |
| t-hono                                                                                                          | 312.6 <sup>a</sup>  | 300.2  | 300.9   | 310.0  | 306.2  | 307.3   | 317.1  |
| hnmn                                                                                                            | 331.8 <sup>a</sup>  | 316.9  | 317.7   | 326.9  | 301.4  | 302.7   | 325.4  |
| cn                                                                                                              | 181.3 <sup>a</sup>  | 172.2  | 172.4   | 176.7  | 179.6  | 180.0   | 185.3  |
| no                                                                                                              | 152.7 <sup>a</sup>  | 147.7  | 147.8   | 150.4  | 156.2  | 156.5   | 159.2  |
| n2o                                                                                                             | 270.8 <sup>a</sup>  | 259.6  | 260.1   | 268.2  | 248.6  | 249.4   | 264.9  |
| c-hooo                                                                                                          | 233.1 <sup>a</sup>  | 227.6  | 228.1   | 234.0  | 220.0  | 221.0   | 226.2  |
| o2                                                                                                              | 120.8 <sup>a</sup>  | 115.7  | 115.8   | 116.0  | 121.6  | 121.8   | 120.4  |
| f2                                                                                                              | 39.0 <sup>a</sup>   | 35.1   | 35.2    | 37.7   | 33.0   | 33.1    | 32.8   |
| t-hooo                                                                                                          | 233.3 <sup>a</sup>  | 221.9  | 222.4   | 229.1  | 219.3  | 220.2   | 225.7  |
| no2                                                                                                             | 227.9 <sup>a</sup>  | 225.0  | 225.4   | 231.5  | 229.4  | 230.1   | 236.4  |
| of                                                                                                              | 53.1 <sup>a</sup>   | 48.0   | 48.1    | 47.6   | 46.9   | 47.1    | 47.5   |
| c2                                                                                                              | 147.0 <sup>a</sup>  | 145.4  | 145.6   | 150.6  | 123.5  | 124.0   | 124.8  |
| f2o                                                                                                             | 93.8 <sup>a</sup>   | 91.0   | 91.3    | 91.9   | 86.4   | 86.8    | 87.8   |
| fo2                                                                                                             | 134.7 <sup>a</sup>  | 115.1  | 115.4   | 116.0  | 116.6  | 117.1   | 119.0  |
| foof                                                                                                            | 152.4 <sup>a</sup>  | 143.1  | 143.6   | 144.8  | 133.7  | 134.6   | 137.8  |
| o3                                                                                                              | 147.4 <sup>a</sup>  | 139.6  | 140.0   | 141.9  | 129.5  | 130.0   | 128.9  |
| The OM <sub>x</sub> and OM <sub>x</sub> -D3T energies are corrected by excluding ZPVE and thermal contributions |                     |        |         |        |        |         |        |
| h2                                                                                                              | 109.5 <sup>a</sup>  | 110.9  | 111.0   | 108.2  | 108.9  | 109.0   | 109.1  |
| ch2-trip                                                                                                        | 190.7 <sup>a</sup>  | 191.5  | 191.8   | 194.3  | 193.6  | 194.0   | 195.3  |
| ch3                                                                                                             | 307.9 <sup>a</sup>  | 308.3  | 308.7   | 310.6  | 306.5  | 307.3   | 309.3  |
| ch4                                                                                                             | 420.4 <sup>a</sup>  | 421.7  | 422.4   | 422.7  | 420.2  | 421.3   | 420.8  |
| c2h6                                                                                                            | 713.1 <sup>a</sup>  | 712.4  | 714.2   | 713.4  | 711.5  | 714.4   | 712.0  |
| propane                                                                                                         | 1007.9 <sup>a</sup> | 1005.6 | 1008.8  | 1007.2 | 1004.8 | 1009.8  | 1005.8 |
| ch2-sing                                                                                                        | 181.5 <sup>a</sup>  | 178.5  | 178.8   | 184.4  | 181.0  | 181.5   | 185.5  |
| ch                                                                                                              | 84.2 <sup>a</sup>   | 86.0   | 86.2    | 90.3   | 88.0   | 88.2    | 91.5   |
| c2h5f                                                                                                           | 721.5 <sup>a</sup>  | 721.2  | 723.0   | 721.0  | 718.4  | 721.4   | 719.7  |
| ch3nh2                                                                                                          | 582.3 <sup>a</sup>  | 578.6  | 580.0   | 582.2  | 578.4  | 580.7   | 580.2  |
| ch3f                                                                                                            | 423.0 <sup>a</sup>  | 425.3  | 426.0   | 424.3  | 421.5  | 422.6   | 422.8  |
| propene                                                                                                         | 861.6 <sup>a</sup>  | 859.7  | 862.2   | 861.0  | 859.0  | 862.8   | 860.2  |
| nh3                                                                                                             | 298.0 <sup>a</sup>  | 290.4  | 290.9   | 296.6  | 294.9  | 295.6   | 296.5  |
| ethanol                                                                                                         | 811.2 <sup>a</sup>  | 807.0  | 809.2   | 808.5  | 806.7  | 810.3   | 807.3  |
| ch3nh                                                                                                           | 474.6 <sup>a</sup>  | 473.9  | 475.0   | 477.2  | 475.5  | 477.4   | 479.1  |
| c2h4                                                                                                            | 564.1 <sup>a</sup>  | 562.8  | 563.9   | 563.7  | 561.3  | 563.3   | 562.4  |
| methanol                                                                                                        | 513.5 <sup>a</sup>  | 511.0  | 512.0   | 512.8  | 510.9  | 512.6   | 511.7  |
| nh2                                                                                                             | 182.6 <sup>a</sup>  | 178.7  | 178.9   | 185.7  | 186.1  | 186.6   | 191.0  |
| nh                                                                                                              | 83.1 <sup>a</sup>   | 83.4   | 83.5    | 88.2   | 88.8   | 88.9    | 92.7   |
| ch2nh2                                                                                                          | 482.3 <sup>a</sup>  | 485.9  | 487.1   | 488.6  | 488.9  | 490.8   | 488.0  |
| h2o                                                                                                             | 233.0 <sup>a</sup>  | 229.4  | 229.6   | 231.8  | 230.4  | 230.7   | 230.0  |
| hf                                                                                                              | 141.6 <sup>a</sup>  | 137.1  | 137.2   | 144.0  | 139.9  | 140.0   | 139.9  |
| ch2ch                                                                                                           | 446.1 <sup>a</sup>  | 448.6  | 449.5   | 450.3  | 449.8  | 451.3   | 450.6  |
| oh                                                                                                              | 107.2 <sup>a</sup>  | 109.9  | 110.0   | 111.1  | 110.7  | 110.8   | 112.0  |
| propyne                                                                                                         | 705.6 <sup>a</sup>  | 703.1  | 704.7   | 704.3  | 703.2  | 705.8   | 704.1  |
| acetaldehyde                                                                                                    | 677.9 <sup>a</sup>  | 680.5  | 682.1   | 681.3  | 682.5  | 685.1   | 683.8  |
| allene                                                                                                          | 704.1 <sup>a</sup>  | 702.8  | 704.5   | 703.9  | 702.9  | 705.5   | 703.7  |
| c2h3f                                                                                                           | 573.9 <sup>a</sup>  | 570.1  | 571.3   | 570.3  | 569.7  | 571.7   | 570.9  |
| oxirane                                                                                                         | 651.5 <sup>a</sup>  | 650.4  | 651.9   | 648.4  | 645.5  | 648.0   | 642.6  |
| ch2f2                                                                                                           | 437.7 <sup>a</sup>  | 436.0  | 436.8   | 435.4  | 431.8  | 433.1   | 433.1  |
| ch2c                                                                                                            | 359.9 <sup>a</sup>  | 372.5  | 373.2   | 373.5  | 372.1  | 373.3   | 371.5  |
| n2h4                                                                                                            | 438.3 <sup>a</sup>  | 434.7  | 435.9   | 439.4  | 436.2  | 438.0   | 439.9  |
| ch2nh                                                                                                           | 439.4 <sup>a</sup>  | 438.0  | 438.9   | 441.2  | 440.8  | 442.3   | 441.4  |
| acetic                                                                                                          | 804.0 <sup>a</sup>  | 797.3  | 799.4   | 799.1  | 797.1  | 800.5   | 799.4  |
| c2h2                                                                                                            | 405.5 <sup>a</sup>  | 404.7  | 405.3   | 405.5  | 404.4  | 405.4   | 405.5  |
| h2co                                                                                                            | 374.7 <sup>a</sup>  | 377.5  | 378.0   | 377.4  | 378.7  | 379.6   | 379.7  |
| h2cn                                                                                                            | 343.7 <sup>a</sup>  | 345.8  | 346.5   | 347.0  | 346.6  | 347.7   | 347.7  |

... continued on next page ...

Table S28: ... continued from previous page ...

| Species   | Ref.               | OM2   | OM2-D3T | ODM2  | OM3   | OM3-D3T | ODM3  |
|-----------|--------------------|-------|---------|-------|-------|---------|-------|
| t-hcoh    | 322.5 <sup>a</sup> | 335.8 | 336.4   | 338.4 | 334.7 | 335.6   | 331.5 |
| c-hcoh    | 317.6 <sup>a</sup> | 334.3 | 334.9   | 335.0 | 328.2 | 329.1   | 324.4 |
| ketene    | 533.5 <sup>a</sup> | 524.5 | 525.4   | 525.8 | 529.9 | 531.5   | 530.6 |
| formic    | 501.9 <sup>a</sup> | 492.9 | 493.8   | 494.6 | 492.8 | 494.3   | 495.1 |
| hcnh      | 336.2 <sup>a</sup> | 338.7 | 339.3   | 343.1 | 346.8 | 347.9   | 348.2 |
| glyoxal   | 635.1 <sup>a</sup> | 640.7 | 642.1   | 640.4 | 642.6 | 645.0   | 644.2 |
| hcof      | 403.7 <sup>a</sup> | 393.6 | 394.2   | 392.7 | 395.7 | 396.7   | 398.0 |
| cf4       | 478.8 <sup>a</sup> | 470.3 | 471.2   | 478.9 | 468.1 | 469.6   | 468.9 |
| hccf      | 398.5 <sup>a</sup> | 394.3 | 395.0   | 394.9 | 397.6 | 398.7   | 398.0 |
| hcn       | 313.4 <sup>a</sup> | 318.3 | 318.7   | 319.2 | 316.2 | 316.9   | 318.8 |
| hnc       | 298.2 <sup>a</sup> | 300.1 | 300.5   | 306.0 | 314.0 | 314.7   | 321.7 |
| cch       | 266.2 <sup>a</sup> | 261.0 | 261.4   | 263.1 | 275.2 | 275.9   | 263.4 |
| hco       | 279.4 <sup>a</sup> | 287.5 | 287.9   | 287.7 | 291.2 | 291.8   | 290.0 |
| co        | 259.7 <sup>a</sup> | 250.6 | 250.8   | 248.5 | 250.8 | 251.1   | 247.0 |
| oxirene   | 456.1 <sup>a</sup> | 454.0 | 454.9   | 453.9 | 454.4 | 455.9   | 453.1 |
| f2co      | 420.6 <sup>a</sup> | 406.6 | 407.3   | 408.1 | 409.4 | 410.5   | 412.4 |
| hocn      | 410.1 <sup>a</sup> | 402.7 | 403.4   | 404.3 | 402.8 | 403.9   | 407.3 |
| hooh      | 269.1 <sup>a</sup> | 266.5 | 267.0   | 266.3 | 266.4 | 267.2   | 265.6 |
| t-n2h2    | 296.5 <sup>a</sup> | 300.0 | 300.7   | 303.6 | 312.1 | 313.1   | 309.4 |
| hnco      | 434.7 <sup>a</sup> | 409.4 | 410.1   | 415.5 | 417.1 | 418.2   | 425.0 |
| c-n2h2    | 291.1 <sup>a</sup> | 303.1 | 303.7   | 305.7 | 309.6 | 310.6   | 307.4 |
| cf2       | 258.8 <sup>a</sup> | 267.1 | 267.4   | 264.9 | 266.4 | 267.0   | 259.7 |
| co2       | 390.1 <sup>a</sup> | 371.5 | 371.9   | 372.1 | 377.9 | 378.6   | 380.9 |
| fccf      | 386.1 <sup>a</sup> | 378.5 | 379.2   | 379.5 | 385.1 | 386.2   | 386.6 |
| dioxirane | 410.0 <sup>a</sup> | 414.3 | 415.2   | 404.3 | 399.1 | 400.5   | 393.6 |
| cf        | 132.7 <sup>a</sup> | 138.6 | 138.7   | 135.0 | 138.4 | 138.6   | 133.5 |
| nccn      | 502.0 <sup>a</sup> | 501.2 | 502.1   | 499.9 | 501.3 | 502.9   | 504.0 |
| n2        | 228.5 <sup>a</sup> | 226.1 | 226.3   | 227.5 | 216.2 | 216.5   | 222.8 |
| n2h       | 224.9 <sup>a</sup> | 236.7 | 237.1   | 239.5 | 239.3 | 240.0   | 240.3 |
| hoo       | 175.5 <sup>a</sup> | 179.9 | 180.2   | 178.4 | 177.0 | 177.4   | 174.9 |
| hcno      | 365.0 <sup>a</sup> | 359.6 | 360.3   | 365.1 | 361.6 | 362.8   | 363.1 |
| honc      | 350.1 <sup>a</sup> | 350.3 | 351.1   | 355.8 | 358.5 | 359.7   | 371.3 |
| hno       | 205.9 <sup>a</sup> | 211.0 | 211.3   | 214.4 | 220.8 | 221.4   | 220.6 |
| hof       | 158.7 <sup>a</sup> | 154.6 | 154.8   | 153.5 | 152.6 | 153.0   | 152.0 |
| c-hono    | 312.2 <sup>a</sup> | 314.0 | 314.6   | 316.4 | 318.6 | 319.7   | 319.6 |
| t-hono    | 312.6 <sup>a</sup> | 309.2 | 309.8   | 310.0 | 315.6 | 316.6   | 317.1 |
| hnnn      | 331.8 <sup>a</sup> | 326.6 | 327.4   | 326.9 | 310.5 | 311.8   | 325.4 |
| cn        | 181.3 <sup>a</sup> | 174.7 | 175.0   | 176.7 | 182.1 | 182.5   | 185.3 |
| no        | 152.7 <sup>a</sup> | 149.9 | 150.0   | 150.4 | 158.4 | 158.7   | 159.2 |
| n2o       | 270.8 <sup>a</sup> | 264.3 | 264.8   | 268.2 | 253.0 | 253.8   | 264.9 |
| c-hooo    | 233.1 <sup>a</sup> | 235.9 | 236.4   | 234.0 | 228.6 | 229.5   | 226.2 |
| o2        | 120.8 <sup>a</sup> | 117.6 | 117.7   | 116.0 | 123.5 | 123.7   | 120.4 |
| f2        | 39.0 <sup>a</sup>  | 36.5  | 36.6    | 37.7  | 34.3  | 34.4    | 32.8  |
| t-hooo    | 233.3 <sup>a</sup> | 230.2 | 230.7   | 229.1 | 227.8 | 228.6   | 225.7 |
| no2       | 227.9 <sup>a</sup> | 228.7 | 229.2   | 231.5 | 233.2 | 233.9   | 236.4 |
| of        | 53.1 <sup>a</sup>  | 49.3  | 49.4    | 47.6  | 48.1  | 48.3    | 47.5  |
| c2        | 147.0 <sup>a</sup> | 147.7 | 148.0   | 150.6 | 125.7 | 126.2   | 124.8 |
| f2o       | 93.8 <sup>a</sup>  | 93.7  | 94.0    | 91.9  | 88.9  | 89.3    | 87.8  |
| fo2       | 134.7 <sup>a</sup> | 118.0 | 118.3   | 116.0 | 119.3 | 119.9   | 119.0 |
| foof      | 152.4 <sup>a</sup> | 147.5 | 148.0   | 144.8 | 137.7 | 138.6   | 137.8 |
| o3        | 147.4 <sup>a</sup> | 143.2 | 143.5   | 141.9 | 132.9 | 133.5   | 128.9 |

a A.Karton, S.Daon, J.M.Martin, Chem.Phys.Lett. 510, 165 (2011).

Table S29: Benchmark Results for the BDE99 Subset of the W4-11-CHNOF Set. Reaction Energies (kcal/mol)

| Species                                                                             | Ref.               | OM2   | OM2-D3T | ODM2  | OM3   | OM3-D3T | ODM3  |
|-------------------------------------------------------------------------------------|--------------------|-------|---------|-------|-------|---------|-------|
| The OM $x$ and OM $x$ -D3T energies are uncorrected atomization enthalpies at 298 K |                    |       |         |       |       |         |       |
| F-OOF→F+OOF                                                                         | 17.6 <sup>a</sup>  | 28.0  | 28.2    | 28.8  | 17.1  | 17.5    | 18.8  |
| FO-OF→FO+OF                                                                         | 46.2 <sup>a</sup>  | 47.0  | 47.4    | 49.7  | 39.8  | 40.3    | 42.8  |
| O-OF→O+OF                                                                           | 81.7 <sup>a</sup>  | 67.1  | 67.3    | 68.5  | 69.6  | 70.0    | 71.5  |
| OO-F→OO+F                                                                           | 13.9 <sup>a</sup>  | -0.6  | -0.4    | 0.1   | -5.0  | -4.7    | -1.5  |
| F-OF→F+OF                                                                           | 40.7 <sup>a</sup>  | 43.0  | 43.1    | 44.4  | 39.4  | 39.7    | 40.3  |
| H-OF→H+OF                                                                           | 105.6 <sup>a</sup> | 100.2 | 100.3   | 105.9 | 98.9  | 99.1    | 104.5 |
| HO-F→HO+F                                                                           | 51.5 <sup>a</sup>  | 42.1  | 42.2    | 42.4  | 39.4  | 39.6    | 40.1  |
| ON-O→ON+O                                                                           | 75.1 <sup>a</sup>  | 77.3  | 77.6    | 81.0  | 73.2  | 73.6    | 77.2  |
| N-NO→N+NO                                                                           | 118.1 <sup>a</sup> | 111.9 | 112.2   | 117.8 | 92.4  | 93.0    | 105.7 |
| NN-O→NN+O                                                                           | 42.4 <sup>a</sup>  | 36.4  | 36.7    | 40.7  | 35.0  | 35.5    | 42.0  |
| trans-H-ONO→trans-H+ONO                                                             | 84.8 <sup>a</sup>  | 75.3  | 75.5    | 78.5  | 76.9  | 77.2    | 80.8  |
| trans-HO-NO→trans-HO+NO                                                             | 52.7 <sup>a</sup>  | 46.4  | 46.8    | 48.4  | 43.6  | 44.2    | 46.0  |
| H-NC→H+NC                                                                           | 116.8 <sup>a</sup> | 119.8 | 120.0   | 129.3 | 126.2 | 126.5   | 136.4 |
| HN-C→HN+C                                                                           | 215.1 <sup>a</sup> | 212.3 | 212.6   | 217.7 | 220.9 | 221.4   | 229.0 |
| HO-NC→HO+NC                                                                         | 61.6 <sup>a</sup>  | 62.6  | 63.0    | 68.0  | 62.7  | 63.5    | 74.0  |
| HN-CO→HN+CO                                                                         | 91.9 <sup>a</sup>  | 71.8  | 72.2    | 78.7  | 74.3  | 75.0    | 85.3  |
| HC-NO→HC+NO                                                                         | 128.0 <sup>a</sup> | 119.3 | 119.7   | 124.4 | 111.2 | 111.9   | 112.5 |
| H-NO→H+NO                                                                           | 53.1 <sup>a</sup>  | 56.3  | 56.5    | 64.0  | 57.6  | 57.9    | 61.4  |
| HN-O→HN+O                                                                           | 122.8 <sup>a</sup> | 124.3 | 124.5   | 126.2 | 128.8 | 129.2   | 127.9 |
| H3C-OH→H3C+OH                                                                       | 98.4 <sup>a</sup>  | 86.9  | 87.3    | 91.1  | 87.5  | 88.3    | 90.4  |
| trans-HC-OH→trans-HC+OH                                                             | 131.1 <sup>a</sup> | 135.0 | 135.3   | 136.9 | 131.1 | 131.7   | 128.1 |
| trans-HCO-H→trans-HCO+H                                                             | 43.0 <sup>a</sup>  | 42.7  | 42.9    | 50.6  | 37.7  | 38.0    | 41.6  |
| H(O=)C-OH→H(O=)C+OH                                                                 | 115.3 <sup>a</sup> | 90.3  | 90.8    | 95.7  | 85.9  | 86.7    | 93.2  |
| H2C=C-O→H2C=C+O                                                                     | 173.5 <sup>a</sup> | 149.1 | 149.4   | 152.3 | 154.8 | 155.2   | 159.0 |
| H2C-C=O→H2C+C=O                                                                     | 83.0 <sup>a</sup>  | 77.7  | 78.2    | 82.9  | 81.1  | 82.0    | 88.2  |
| H(O=)C-C(=O)H→H(O=)C+C(=O)H                                                         | 76.3 <sup>a</sup>  | 60.5  | 61.3    | 65.0  | 56.1  | 57.3    | 64.2  |
| H3C-C(=O)H→H3C+C(=O)H                                                               | 90.6 <sup>a</sup>  | 78.3  | 79.1    | 83.0  | 78.3  | 79.6    | 84.5  |
| F2C-O→F2C+O                                                                         | 161.8 <sup>a</sup> | 136.7 | 137.0   | 143.2 | 139.9 | 140.4   | 152.7 |
| F-C(=O)H→F+C(=O)H                                                                   | 124.3 <sup>a</sup> | 102.7 | 103.0   | 105.0 | 101.3 | 101.7   | 108.0 |
| H-C(=O)H→H+C(=O)H                                                                   | 95.2 <sup>a</sup>  | 83.2  | 83.4    | 89.7  | 80.9  | 81.2    | 89.7  |
| H2C-O→H2C+O                                                                         | 183.9 <sup>a</sup> | 181.5 | 181.8   | 183.1 | 180.7 | 181.2   | 184.3 |
| H-CO→H+CO                                                                           | 19.7 <sup>a</sup>  | 33.0  | 33.1    | 39.2  | 36.3  | 36.6    | 43.0  |
| HC-O→HC+O                                                                           | 195.2 <sup>a</sup> | 198.4 | 198.6   | 197.4 | 200.0 | 200.3   | 198.5 |
| OC-O→OC+O                                                                           | 130.4 <sup>a</sup> | 118.3 | 118.5   | 123.5 | 124.4 | 124.8   | 133.9 |
| H2N-CH2→H2N+CH2                                                                     | 108.9 <sup>a</sup> | 109.4 | 110.0   | 108.5 | 103.3 | 104.3   | 101.6 |
| H-N(-H)CH2→H+N(-H)CH2                                                               | 42.8 <sup>a</sup>  | 43.3  | 43.5    | 47.4  | 43.3  | 43.7    | 46.6  |
| H3C-NH→H3C+NH                                                                       | 83.7 <sup>a</sup>  | 76.3  | 76.9    | 78.4  | 74.6  | 75.5    | 77.1  |
| H-CH2NH→H+CH2NH                                                                     | 35.2 <sup>a</sup>  | 31.1  | 31.3    | 36.0  | 30.0  | 30.4    | 37.7  |
| H-CH2NH2→H+CH2NH2                                                                   | 100.0 <sup>a</sup> | 85.3  | 85.6    | 93.7  | 82.6  | 83.1    | 92.2  |
| H3C(H-)N-H→H3C(H-)N+H                                                               | 107.7 <sup>a</sup> | 97.5  | 97.8    | 105.1 | 95.9  | 96.3    | 101.1 |
| H-C(H)=NH→H+C(H)=NH                                                                 | 103.2 <sup>a</sup> | 92.1  | 92.4    | 98.1  | 86.9  | 87.3    | 93.1  |
| HN-CH→HN+CH                                                                         | 168.9 <sup>a</sup> | 163.7 | 164.0   | 164.6 | 165.0 | 165.6   | 164.0 |
| H-NCH→H+NCH                                                                         | 22.8 <sup>a</sup>  | 16.5  | 16.8    | 23.9  | 26.8  | 27.2    | 29.4  |
| H-CN→H+CN                                                                           | 132.1 <sup>a</sup> | 137.4 | 137.6   | 142.5 | 128.1 | 128.4   | 133.5 |
| HC-N→HC+N                                                                           | 229.2 <sup>a</sup> | 226.8 | 227.1   | 228.9 | 223.2 | 223.6   | 227.3 |
| NC-CN→NC+CN                                                                         | 139.3 <sup>a</sup> | 148.1 | 148.7   | 146.5 | 133.8 | 134.7   | 133.4 |
| trans-HOO-O→trans-HOO+O                                                             | 57.8 <sup>a</sup>  | 48.5  | 48.8    | 50.7  | 49.1  | 49.6    | 50.8  |
| trans-HO-OO→trans-HO+OO                                                             | 5.3 <sup>a</sup>   | 0.0   | 0.4     | 2.0   | -8.7  | -8.2    | -6.7  |
| trans-H-OOO→trans-H+OOO                                                             | 85.9 <sup>a</sup>  | 82.3  | 82.4    | 87.3  | 89.9  | 90.2    | 96.8  |
| OO-O→OO+O                                                                           | 26.6 <sup>a</sup>  | 23.9  | 24.1    | 25.9  | 7.9   | 8.3     | 8.4   |
| HOO-H→HOO+H                                                                         | 93.6 <sup>a</sup>  | 81.2  | 81.4    | 87.9  | 83.6  | 83.9    | 90.7  |
| HO-OH→HO+OH                                                                         | 54.7 <sup>a</sup>  | 42.3  | 42.6    | 44.0  | 40.8  | 41.3    | 41.6  |
| HO-O→HO+O                                                                           | 68.3 <sup>a</sup>  | 67.2  | 67.4    | 67.3  | 63.7  | 64.0    | 62.9  |
| H-OO→H+OO                                                                           | 54.7 <sup>a</sup>  | 57.7  | 57.8    | 62.4  | 48.6  | 48.9    | 54.5  |
| HO-H→HO+H                                                                           | 125.8 <sup>a</sup> | 113.7 | 113.8   | 120.7 | 113.5 | 113.7   | 118.0 |
| HN-NN→HN+NN                                                                         | 20.2 <sup>a</sup>  | 14.1  | 14.6    | 11.1  | 2.9   | 3.7     | 9.9   |
| H2N-NH2→H2N+NH2                                                                     | 73.1 <sup>a</sup>  | 70.4  | 71.0    | 68.1  | 57.7  | 58.7    | 57.9  |
| trans-HN-NH→trans-HN+NH                                                             | 130.3 <sup>a</sup> | 126.9 | 127.3   | 127.1 | 128.8 | 129.4   | 124.0 |
| HN-N→HN+N                                                                           | 141.8 <sup>a</sup> | 150.5 | 150.8   | 151.3 | 148.3 | 148.8   | 147.5 |
| H2N-H→H2N+H                                                                         | 115.4 <sup>a</sup> | 103.9 | 104.1   | 110.9 | 101.4 | 101.7   | 105.5 |
| HN-H→HN+H                                                                           | 99.5 <sup>a</sup>  | 89.5  | 89.6    | 97.4  | 91.7  | 92.0    | 98.3  |

... continued on next page ...

Table S29: ... continued from previous page ...

| Species                                                                                | Ref.               | OM2   | OM2-D3T | ODM2  | OM3   | OM3-D3T | ODM3  |
|----------------------------------------------------------------------------------------|--------------------|-------|---------|-------|-------|---------|-------|
| H2CC-CH2→H2CC+CH2                                                                      | 153.4 <sup>a</sup> | 132.6 | 133.3   | 136.0 | 131.3 | 132.3   | 136.8 |
| HCC-CH3→HCC+CH3                                                                        | 131.6 <sup>a</sup> | 127.9 | 128.6   | 130.6 | 127.0 | 128.1   | 131.4 |
| H2C=(H)C-CH3→H2C=(H)C+CH3                                                              | 107.6 <sup>a</sup> | 96.4  | 97.5    | 100.1 | 96.3  | 97.9    | 100.4 |
| H2C=(H)C-F→H2C=(H)C+F                                                                  | 127.8 <sup>a</sup> | 118.2 | 118.5   | 120.1 | 116.8 | 117.3   | 120.3 |
| H3C-CH3→H3C+CH3                                                                        | 97.3 <sup>a</sup>  | 88.3  | 89.1    | 92.3  | 90.6  | 91.9    | 93.4  |
| H2C-CH2→H2C+CH2                                                                        | 182.6 <sup>a</sup> | 171.4 | 172.1   | 175.0 | 166.4 | 167.5   | 171.7 |
| H2C=C-H→H2C=C+H                                                                        | 86.2 <sup>a</sup>  | 70.5  | 70.7    | 76.7  | 72.0  | 72.3    | 79.0  |
| H-C(H)=CH→H+C(H)=CH                                                                    | 40.6 <sup>a</sup>  | 39.3  | 39.6    | 44.8  | 40.9  | 41.3    | 45.1  |
| H2C-C→H2C+C                                                                            | 169.2 <sup>a</sup> | 176.8 | 177.2   | 179.2 | 174.6 | 175.3   | 176.2 |
| HCC-F→HCC+F                                                                            | 132.3 <sup>a</sup> | 130.4 | 130.6   | 131.8 | 131.0 | 131.3   | 134.6 |
| HC-CF→HC+CF                                                                            | 181.5 <sup>a</sup> | 164.4 | 164.7   | 169.6 | 165.8 | 166.4   | 173.0 |
| HCC-H→HCC+H                                                                            | 139.4 <sup>a</sup> | 136.9 | 137.1   | 142.4 | 134.0 | 134.3   | 142.1 |
| HC-CH→HC+CH                                                                            | 237.1 <sup>a</sup> | 225.4 | 225.8   | 224.9 | 221.3 | 221.8   | 222.5 |
| H3C-F→H3C+F                                                                            | 115.1 <sup>a</sup> | 112.5 | 112.8   | 113.7 | 110.2 | 110.6   | 113.5 |
| H3C-H→H3C+H                                                                            | 112.5 <sup>a</sup> | 105.3 | 105.5   | 112.1 | 105.4 | 105.7   | 111.5 |
| H2C-H→H2C+H                                                                            | 117.1 <sup>a</sup> | 110.4 | 110.6   | 116.2 | 107.1 | 107.5   | 114.0 |
| HC-H→HC+H                                                                              | 106.5 <sup>a</sup> | 100.1 | 100.2   | 104.0 | 100.2 | 100.4   | 103.9 |
| FC-F→FC+F                                                                              | 126.1 <sup>a</sup> | 127.0 | 127.1   | 129.8 | 126.5 | 126.8   | 126.3 |
| The OMx and OMx-D3T energies are corrected by excluding ZPVE and thermal contributions |                    |       |         |       |       |         |       |
| F-OOF→F+OOF                                                                            | 17.6 <sup>a</sup>  | 29.5  | 29.7    | 28.8  | 18.4  | 18.7    | 18.8  |
| FO-OF→FO+OF                                                                            | 46.2 <sup>a</sup>  | 48.8  | 49.2    | 49.7  | 41.5  | 42.0    | 42.8  |
| O-OF→O+OF                                                                              | 81.7 <sup>a</sup>  | 68.7  | 68.9    | 68.5  | 71.2  | 71.6    | 71.5  |
| OO-F→OO+F                                                                              | 13.9 <sup>a</sup>  | 0.4   | 0.6     | 0.1   | -4.2  | -3.9    | -1.5  |
| F-OF→F+OF                                                                              | 40.7 <sup>a</sup>  | 44.4  | 44.6    | 44.4  | 40.8  | 41.1    | 40.3  |
| H-OF→H+OF                                                                              | 105.6 <sup>a</sup> | 105.3 | 105.4   | 105.9 | 104.5 | 104.7   | 104.5 |
| HO-F→HO+F                                                                              | 51.5 <sup>a</sup>  | 44.7  | 44.8    | 42.4  | 41.9  | 42.2    | 40.1  |
| ON-O→ON+O                                                                              | 75.1 <sup>a</sup>  | 78.9  | 79.1    | 81.0  | 74.7  | 75.2    | 77.2  |
| N-NO→N+NO                                                                              | 118.1 <sup>a</sup> | 114.4 | 114.7   | 117.8 | 94.5  | 95.1    | 105.7 |
| NN-O→NN+O                                                                              | 42.4 <sup>a</sup>  | 38.2  | 38.5    | 40.7  | 36.7  | 37.2    | 42.0  |
| trans-H-ONO→trans-H+ONO                                                                | 84.8 <sup>a</sup>  | 80.4  | 80.6    | 78.5  | 82.4  | 82.7    | 80.8  |
| trans-HO-NO→trans-HO+NO                                                                | 52.7 <sup>a</sup>  | 49.4  | 49.8    | 48.4  | 46.5  | 47.1    | 46.0  |
| H-NC→H+NC                                                                              | 116.8 <sup>a</sup> | 125.3 | 125.5   | 129.3 | 131.9 | 132.3   | 136.4 |
| HN-C→HN+C                                                                              | 215.1 <sup>a</sup> | 216.7 | 217.0   | 217.7 | 225.2 | 225.8   | 229.0 |
| HO-NC→HO+NC                                                                            | 61.6 <sup>a</sup>  | 65.7  | 66.1    | 68.0  | 65.8  | 66.5    | 74.0  |
| HN-CO→HN+CO                                                                            | 91.9 <sup>a</sup>  | 75.4  | 75.8    | 78.7  | 77.5  | 78.2    | 85.3  |
| HC-NO→HC+NO                                                                            | 128.0 <sup>a</sup> | 123.7 | 124.2   | 124.4 | 115.2 | 115.9   | 112.5 |
| H-NO→H+NO                                                                              | 53.1 <sup>a</sup>  | 61.1  | 61.3    | 64.0  | 62.4  | 62.7    | 61.4  |
| HN-O→HN+O                                                                              | 122.8 <sup>a</sup> | 127.6 | 127.8   | 126.2 | 132.1 | 132.5   | 127.9 |
| H3C-OH→H3C+OH                                                                          | 98.4 <sup>a</sup>  | 92.8  | 93.3    | 91.1  | 93.8  | 94.5    | 90.4  |
| trans-HC-OH→trans-HC+OH                                                                | 131.1 <sup>a</sup> | 139.9 | 140.2   | 136.9 | 136.1 | 136.6   | 128.1 |
| trans-HCO-H→trans-HCO+H                                                                | 43.0 <sup>a</sup>  | 48.3  | 48.5    | 50.6  | 43.5  | 43.8    | 41.6  |
| H(O=C)-OH→H(O=C)+OH                                                                    | 115.3 <sup>a</sup> | 95.5  | 96.0    | 95.7  | 90.9  | 91.7    | 93.2  |
| H2C=C-O→H2C=C+O                                                                        | 173.5 <sup>a</sup> | 152.0 | 152.3   | 152.3 | 157.8 | 158.3   | 159.0 |
| H2C-C=O→H2C+C=O                                                                        | 83.0 <sup>a</sup>  | 82.3  | 82.9    | 82.9  | 85.6  | 86.5    | 88.2  |
| H(O=C)-C(=O)H→H(O=C)+C(=O)H                                                            | 76.3 <sup>a</sup>  | 65.7  | 66.4    | 65.0  | 60.1  | 61.4    | 64.2  |
| H3C-C(=O)H→H3C+C(=O)H                                                                  | 90.6 <sup>a</sup>  | 84.7  | 85.6    | 83.0  | 84.8  | 86.1    | 84.5  |
| F2C-O→F2C+O                                                                            | 161.8 <sup>a</sup> | 139.5 | 139.8   | 143.2 | 143.0 | 143.5   | 152.7 |
| F-C(=O)H→F+C(=O)H                                                                      | 124.3 <sup>a</sup> | 106.1 | 106.3   | 105.0 | 104.5 | 104.9   | 108.0 |
| H-C(=O)H→H+C(=O)H                                                                      | 95.2 <sup>a</sup>  | 89.9  | 90.2    | 89.7  | 87.5  | 87.9    | 89.7  |
| H2C-O→H2C+O                                                                            | 183.9 <sup>a</sup> | 186.0 | 186.2   | 183.1 | 185.2 | 185.7   | 184.3 |
| H-CO→H+CO                                                                              | 19.7 <sup>a</sup>  | 36.9  | 37.1    | 39.2  | 40.4  | 40.7    | 43.0  |
| HC-O→HC+O                                                                              | 195.2 <sup>a</sup> | 201.5 | 201.7   | 197.4 | 203.2 | 203.6   | 198.5 |
| OC-O→OC+O                                                                              | 130.4 <sup>a</sup> | 120.9 | 121.1   | 123.5 | 127.1 | 127.5   | 133.9 |
| H2N-CH2→H2N+CH2                                                                        | 108.9 <sup>a</sup> | 115.8 | 116.4   | 108.5 | 109.2 | 110.2   | 101.6 |
| H-N(-H)CH2→H+N(-H)CH2                                                                  | 42.8 <sup>a</sup>  | 47.9  | 48.2    | 47.4  | 48.1  | 48.5    | 46.6  |
| H3C-NH→H3C+NH                                                                          | 83.7 <sup>a</sup>  | 82.2  | 82.8    | 78.4  | 80.3  | 81.2    | 77.1  |
| H-CH2NH→H+CH2NH                                                                        | 35.2 <sup>a</sup>  | 35.9  | 36.1    | 36.0  | 34.7  | 35.1    | 37.7  |
| H-CH2NH2→H+CH2NH2                                                                      | 100.0 <sup>a</sup> | 92.7  | 92.9    | 93.7  | 89.5  | 89.9    | 92.2  |
| H3C(H-)N-H→H3C(H-)N+H                                                                  | 107.7 <sup>a</sup> | 104.7 | 105.0   | 105.1 | 102.8 | 103.3   | 101.1 |
| H-C(H)=NH→H+C(H)=NH                                                                    | 103.2 <sup>a</sup> | 99.3  | 99.6    | 98.1  | 94.0  | 94.4    | 93.1  |
| HN-CH→HN+CH                                                                            | 168.9 <sup>a</sup> | 169.3 | 169.7   | 164.6 | 170.1 | 170.7   | 164.0 |
| H-NCH→H+NCH                                                                            | 22.8 <sup>a</sup>  | 20.4  | 20.6    | 23.9  | 30.6  | 31.0    | 29.4  |
| H-CN→H+CN                                                                              | 132.1 <sup>a</sup> | 143.6 | 143.8   | 142.5 | 134.2 | 134.4   | 133.5 |
| HC-N→HC+N                                                                              | 229.2 <sup>a</sup> | 232.3 | 232.6   | 228.9 | 228.2 | 228.7   | 227.3 |
| NC-CN→NC+CN                                                                            | 139.3 <sup>a</sup> | 151.7 | 152.2   | 146.5 | 137.1 | 138.0   | 133.4 |

... continued on next page ...

Table S29: ... continued from previous page ...

| Species                   | Ref.               | OM2   | OM2-D3T | ODM2  | OM3   | OM3-D3T | ODM3  |
|---------------------------|--------------------|-------|---------|-------|-------|---------|-------|
| trans-HOO-O→trans-HOO+O   | 57.8 <sup>a</sup>  | 50.3  | 50.6    | 50.7  | 50.8  | 51.2    | 50.8  |
| trans-HO-OO→trans-HO+OO   | 5.3 <sup>a</sup>   | 2.7   | 3.0     | 2.0   | -6.4  | -5.9    | -6.7  |
| trans-H-OOO→trans-H+OOO   | 85.9 <sup>a</sup>  | 87.0  | 87.2    | 87.3  | 94.8  | 95.1    | 96.8  |
| OO-O→OO+O                 | 26.6 <sup>a</sup>  | 25.6  | 25.8    | 25.9  | 9.4   | 9.8     | 8.4   |
| HOO-H→HOO+H               | 93.6 <sup>a</sup>  | 86.6  | 86.8    | 87.9  | 89.5  | 89.7    | 90.7  |
| HO-OH→HO+OH               | 54.7 <sup>a</sup>  | 46.7  | 47.0    | 44.0  | 45.1  | 45.6    | 41.6  |
| HO-O→HO+O                 | 68.3 <sup>a</sup>  | 70.0  | 70.2    | 67.3  | 66.3  | 66.6    | 62.9  |
| H-OO→H+OO                 | 54.7 <sup>a</sup>  | 62.3  | 62.4    | 62.4  | 53.4  | 53.7    | 54.5  |
| HO-H→HO+H                 | 125.8 <sup>a</sup> | 119.5 | 119.6   | 120.7 | 119.7 | 119.9   | 118.0 |
| HN-NN→HN+NN               | 20.2 <sup>a</sup>  | 17.2  | 17.7    | 11.1  | 5.5   | 6.3     | 9.9   |
| H2N-NH2→H2N+NH2           | 73.1 <sup>a</sup>  | 77.4  | 78.0    | 68.1  | 63.9  | 64.9    | 57.9  |
| trans-HN-NH→trans-HN+NH   | 130.3 <sup>a</sup> | 133.3 | 133.7   | 127.1 | 134.6 | 135.2   | 124.0 |
| HN-N→HN+N                 | 141.8 <sup>a</sup> | 153.4 | 153.7   | 151.3 | 150.6 | 151.0   | 147.5 |
| H2N-H→H2N+H               | 115.4 <sup>a</sup> | 111.8 | 111.9   | 110.9 | 108.8 | 109.1   | 105.5 |
| HN-H→HN+H                 | 99.5 <sup>a</sup>  | 95.3  | 95.4    | 97.4  | 97.4  | 97.6    | 98.3  |
| H2CC-CH2→H2CC+CH2         | 153.4 <sup>a</sup> | 138.9 | 139.5   | 136.0 | 137.2 | 138.2   | 136.8 |
| HCC-CH3→HCC+CH3           | 131.6 <sup>a</sup> | 133.8 | 134.5   | 130.6 | 121.5 | 122.6   | 131.4 |
| H2C=(H)C-CH3→H2C=(H)C+CH3 | 107.6 <sup>a</sup> | 102.9 | 103.9   | 100.1 | 102.6 | 104.3   | 100.4 |
| H2C=(H)C-F→H2C=(H)C+F     | 127.8 <sup>a</sup> | 121.5 | 121.8   | 120.1 | 119.9 | 120.4   | 120.3 |
| H3C-CH3→H3C+CH3           | 97.3 <sup>a</sup>  | 95.9  | 96.8    | 92.3  | 98.5  | 99.8    | 93.4  |
| H2C-CH2→H2C+CH2           | 182.6 <sup>a</sup> | 179.8 | 180.4   | 175.0 | 174.2 | 175.3   | 171.7 |
| H2C=C-H→H2C=C+H           | 86.2 <sup>a</sup>  | 76.2  | 76.3    | 76.7  | 77.7  | 78.0    | 79.0  |
| H-C(H)=CH→H+C(H)=CH       | 40.6 <sup>a</sup>  | 43.9  | 44.2    | 44.8  | 45.4  | 45.9    | 45.1  |
| H2C-C→H2C+C               | 169.2 <sup>a</sup> | 181.0 | 181.4   | 179.2 | 178.6 | 179.3   | 176.2 |
| HCC-F→HCC+F               | 132.3 <sup>a</sup> | 133.3 | 133.5   | 131.8 | 122.5 | 122.8   | 134.6 |
| HC-CF→HC+CF               | 181.5 <sup>a</sup> | 169.7 | 170.1   | 169.6 | 171.2 | 171.8   | 173.0 |
| HCC-H→HCC+H               | 139.4 <sup>a</sup> | 143.7 | 143.9   | 142.4 | 129.2 | 129.5   | 142.1 |
| HC-CH→HC+CH               | 237.1 <sup>a</sup> | 232.7 | 233.0   | 224.9 | 228.4 | 229.0   | 222.5 |
| H3C-F→H3C+F               | 115.1 <sup>a</sup> | 117.1 | 117.3   | 113.7 | 114.9 | 115.3   | 113.5 |
| H3C-H→H3C+H               | 112.5 <sup>a</sup> | 113.5 | 113.7   | 112.1 | 113.7 | 114.0   | 111.5 |
| H2C-H→H2C+H               | 117.1 <sup>a</sup> | 116.8 | 117.0   | 116.2 | 112.9 | 113.3   | 114.0 |
| HC-H→HC+H                 | 106.5 <sup>a</sup> | 105.5 | 105.6   | 104.0 | 105.5 | 105.8   | 103.9 |
| FC-F→FC+F                 | 126.1 <sup>a</sup> | 128.5 | 128.7   | 129.8 | 128.0 | 128.3   | 126.3 |

a A.Karton, S.Daon, J.M.Martin, Chem.Phys.Lett. 510, 165 (2011).

Table S30: Benchmark Results for the HAT707 Subset of the W4-11-CHNOF Set. Reaction Energies (kcal/mol)

| Species                                                                             | Ref.                | OM2    | OM2-D3T | ODM2   | OM3    | OM3-D3T | ODM3   |
|-------------------------------------------------------------------------------------|---------------------|--------|---------|--------|--------|---------|--------|
| The OM $x$ and OM $x$ -D3T energies are uncorrected atomization enthalpies at 298 K |                     |        |         |        |        |         |        |
| H+CH <sub>3</sub> F→HF+CH <sub>3</sub>                                              | -26.6 <sup>a</sup>  | -20.0  | -19.9   | -30.3  | -25.0  | -24.7   | -26.4  |
| H+FOOF→HF+FOO                                                                       | -124.0 <sup>a</sup> | -104.6 | -104.5  | -115.2 | -118.1 | -117.8  | -121.0 |
| H+FOOF→OH+FOF                                                                       | -48.6 <sup>a</sup>  | -54.1  | -53.9   | -58.2  | -59.2  | -58.9   | -62.0  |
| H+FOO→OH+OF                                                                         | -25.6 <sup>a</sup>  | -39.1  | -38.9   | -42.7  | -36.8  | -36.6   | -40.5  |
| H+FOO→HF+O <sub>2</sub>                                                             | -127.7 <sup>a</sup> | -133.2 | -133.1  | -143.9 | -140.2 | -140.0  | -141.4 |
| H+FOF→HF+OF                                                                         | -100.9 <sup>a</sup> | -89.6  | -89.5   | -99.7  | -95.8  | -95.6   | -99.5  |
| H+FOF→OH+F <sub>2</sub>                                                             | -52.5 <sup>a</sup>  | -50.3  | -50.2   | -56.8  | -53.1  | -52.9   | -56.9  |
| H+HOF→OH+HF                                                                         | -90.2 <sup>a</sup>  | -90.5  | -90.4   | -101.6 | -95.8  | -95.7   | -99.8  |
| H+OF→HF+O                                                                           | -88.6 <sup>a</sup>  | -84.6  | -84.5   | -96.5  | -88.3  | -88.2   | -92.4  |
| H+OF→OH+F                                                                           | -54.1 <sup>a</sup>  | -58.1  | -58.1   | -63.5  | -59.5  | -59.5   | -64.5  |
| H+O <sub>2</sub> N→OH+NO                                                            | -32.1 <sup>a</sup>  | -28.8  | -28.7   | -30.1  | -33.3  | -33.0   | -34.8  |
| H+O <sub>2</sub> N→NH+O <sub>2</sub>                                                | 24.0 <sup>a</sup>   | 29.6   | 29.8    | 27.3   | 22.9   | 23.2    | 23.2   |
| H+N <sub>2</sub> O→OH+N <sub>2</sub>                                                | -64.8 <sup>a</sup>  | -69.7  | -69.5   | -70.4  | -71.5  | -71.2   | -69.9  |
| H+N <sub>2</sub> O→NH+NO                                                            | 35.0 <sup>a</sup>   | 32.2   | 32.4    | 29.6   | 7.5    | 7.9     | 13.0   |
| H+trans-HONO→OH+HNO                                                                 | -0.5 <sup>a</sup>   | -9.9   | -9.7    | -15.5  | -14.0  | -13.7   | -15.4  |
| H+trans-HONO→NH+HO <sub>2</sub>                                                     | 54.0 <sup>a</sup>   | 47.2   | 47.4    | 43.4   | 51.1   | 51.5    | 49.5   |
| H+HNCO→NH+HCO                                                                       | 72.2 <sup>a</sup>   | 38.8   | 39.1    | 39.5   | 38.0   | 38.4    | 42.3   |
| H+HNCO→CH+HNO                                                                       | 144.6 <sup>a</sup>  | 113.0  | 113.2   | 110.8  | 109.1  | 109.5   | 112.9  |
| H+HNCO→OH+HCN                                                                       | 14.1 <sup>a</sup>   | -16.0  | -15.8   | -14.8  | -6.7   | -6.4    | -5.8   |
| H+HNO→NH+OH                                                                         | 15.6 <sup>a</sup>   | 18.2   | 18.3    | 15.1   | 22.4   | 22.6    | 15.9   |
| H+NO→NH+O                                                                           | 69.7 <sup>a</sup>   | 68.0   | 68.0    | 62.2   | 71.3   | 71.3    | 66.5   |
| H+NO→OH+N                                                                           | 45.5 <sup>a</sup>   | 41.6   | 41.6    | 39.3   | 49.7   | 49.8    | 47.2   |
| H+oxirene→OH+C <sub>2</sub> H <sub>2</sub>                                          | -56.7 <sup>a</sup>  | -57.6  | -57.4   | -62.8  | -57.4  | -57.0   | -64.3  |
| H+oxirane→OH+C <sub>2</sub> H <sub>4</sub>                                          | -19.8 <sup>a</sup>  | -21.0  | -20.8   | -26.3  | -24.9  | -24.6   | -31.8  |
| H+methanol→OH+CH <sub>4</sub>                                                       | -14.1 <sup>a</sup>  | -18.4  | -18.1   | -21.0  | -17.9  | -17.4   | -21.0  |
| H+trans-HCOH→CH+H <sub>2</sub> O                                                    | 5.3 <sup>a</sup>    | 21.2   | 21.4    | 16.3   | 17.6   | 17.9    | 10.1   |
| H+trans-HCOH→OH+CH <sub>2</sub>                                                     | 24.5 <sup>a</sup>   | 34.9   | 35.0    | 32.9   | 31.0   | 31.3    | 24.2   |
| H+formic acid→OH+trans-HCOH                                                         | 72.2 <sup>a</sup>   | 47.6   | 47.9    | 45.1   | 48.2   | 48.7    | 51.6   |
| H+formic acid→H <sub>2</sub> O+HCO                                                  | -10.5 <sup>a</sup>  | -23.4  | -23.1   | -25.0  | -27.6  | -27.0   | -24.8  |
| H+formic acid→CH+H <sub>2</sub> O <sub>2</sub>                                      | 148.6 <sup>a</sup>  | 140.3  | 140.6   | 138.0  | 138.5  | 139.1   | 138.1  |
| H+ketene→OH+CH <sub>2</sub> C                                                       | 66.3 <sup>a</sup>   | 43.0   | 43.2    | 41.2   | 48.3   | 48.6    | 47.1   |
| H+ketene→CH+H <sub>2</sub> CO                                                       | 74.6 <sup>a</sup>   | 61.7   | 62.0    | 58.1   | 64.0   | 64.5    | 59.4   |
| H+glyoxal→OH+oxirene                                                                | 71.8 <sup>a</sup>   | 77.4   | 77.8    | 75.4   | 79.2   | 79.9    | 79.1   |
| H+glyoxal→CH+formic acid                                                            | 49.0 <sup>a</sup>   | 62.5   | 62.9    | 55.6   | 63.6   | 64.3    | 57.5   |
| H+acetaldehyde→CH+methanol                                                          | 80.1 <sup>a</sup>   | 83.7   | 84.2    | 78.2   | 84.3   | 85.0    | 80.6   |
| H+acetaldehyde→OH+C <sub>2</sub> H <sub>4</sub>                                     | 6.6 <sup>a</sup>    | 9.5    | 9.8     | 6.5    | 12.4   | 12.9    | 9.4    |
| H+F <sub>2</sub> CO→OH+CF <sub>2</sub>                                              | 54.6 <sup>a</sup>   | 30.5   | 30.8    | 32.1   | 33.4   | 33.8    | 40.7   |
| H+F <sub>2</sub> CO→CH+FOF                                                          | 242.6 <sup>a</sup>  | 227.1  | 227.4   | 225.8  | 232.5  | 232.9   | 233.1  |
| H+HF <sub>2</sub> CO→HF+HCO                                                         | -17.3 <sup>a</sup>  | -29.8  | -29.6   | -39.0  | -33.9  | -33.6   | -31.8  |
| H+H <sub>2</sub> CO→OH+CH <sub>2</sub> ( <sup>3</sup> B <sub>1</sub> )              | 76.7 <sup>a</sup>   | 75.4   | 75.6    | 71.9   | 74.2   | 74.5    | 72.4   |
| H+H <sub>2</sub> CO→CH+H <sub>2</sub> O                                             | 57.5 <sup>a</sup>   | 61.7   | 62.0    | 55.3   | 60.8   | 61.2    | 58.2   |
| H+HCO→OH+CH                                                                         | 88.0 <sup>a</sup>   | 92.3   | 92.4    | 86.3   | 93.5   | 93.7    | 86.5   |
| H+CO <sub>2</sub> →OH+CO                                                            | 23.2 <sup>a</sup>   | 12.2   | 12.3    | 12.4   | 17.9   | 18.2    | 21.9   |
| H+CO <sub>2</sub> →CH+O <sub>2</sub>                                                | 185.1 <sup>a</sup>  | 168.0  | 168.2   | 165.8  | 166.4  | 166.7   | 168.9  |
| H+CO→CH+O                                                                           | 175.5 <sup>a</sup>  | 165.4  | 165.5   | 158.3  | 163.6  | 163.7   | 155.5  |
| H+CO→OH+C                                                                           | 152.5 <sup>a</sup>  | 142.1  | 142.2   | 137.4  | 141.8  | 141.9   | 135.0  |
| H+HCN→NH+CH                                                                         | 146.1 <sup>a</sup>  | 147.1  | 147.3   | 140.7  | 138.2  | 138.5   | 134.6  |
| H+CN→CH+N                                                                           | 97.1 <sup>a</sup>   | 89.4   | 89.5    | 86.4   | 95.0   | 95.2    | 93.8   |
| H+CN→NH+C                                                                           | 98.2 <sup>a</sup>   | 92.5   | 92.6    | 88.5   | 94.7   | 94.9    | 92.6   |
| H+trans-HO <sub>3</sub> →OH+HO <sub>2</sub>                                         | -49.4 <sup>a</sup>  | -57.6  | -57.4   | -60.4  | -57.3  | -57.1   | -61.2  |
| H+O <sub>3</sub> →OH+O <sub>2</sub>                                                 | -80.6 <sup>a</sup>  | -82.2  | -82.1   | -85.2  | -98.6  | -98.4   | -103.6 |
| H+H <sub>2</sub> O <sub>2</sub> →OH+H <sub>2</sub> O                                | -71.1 <sup>a</sup>  | -71.4  | -71.3   | -76.6  | -72.7  | -72.4   | -76.4  |
| H+HO <sub>2</sub> →2OH                                                              | -38.9 <sup>a</sup>  | -38.9  | -38.8   | -43.9  | -42.8  | -42.6   | -49.0  |
| H+H <sub>2</sub> O→OH+H <sub>2</sub>                                                | 16.3 <sup>a</sup>   | 7.4    | 7.5     | 12.5   | 9.5    | 9.7     | 8.9    |
| H+trans-H <sub>2</sub> N <sub>2</sub> →NH+NH <sub>2</sub>                           | 30.9 <sup>a</sup>   | 37.4   | 37.6    | 29.7   | 37.1   | 37.5    | 25.7   |
| H+propyne→CH+C <sub>2</sub> H <sub>4</sub>                                          | 57.3 <sup>a</sup>   | 55.2   | 55.5    | 50.4   | 54.8   | 55.3    | 50.2   |
| H+propene→CH+C <sub>2</sub> H <sub>6</sub>                                          | 64.3 <sup>a</sup>   | 62.3   | 62.9    | 57.2   | 60.5   | 61.3    | 56.7   |
| H+C <sub>2</sub> H <sub>3</sub> F→HF+C <sub>2</sub> H <sub>3</sub>                  | -13.8 <sup>a</sup>  | -14.4  | -14.1   | -24.0  | -18.4  | -18.0   | -19.5  |
| H+C <sub>2</sub> H <sub>3</sub> F→CH+CH <sub>3</sub> F                              | 66.7 <sup>a</sup>   | 59.8   | 60.2    | 55.8   | 61.4   | 62.0    | 56.6   |
| H+C <sub>2</sub> H <sub>4</sub> →CH+CH <sub>4</sub>                                 | 59.5 <sup>a</sup>   | 55.9   | 56.3    | 50.7   | 54.1   | 54.7    | 50.1   |
| H+C <sub>2</sub> H <sub>3</sub> →CH+CH <sub>3</sub>                                 | 54.0 <sup>a</sup>   | 54.2   | 54.5    | 49.4   | 54.8   | 55.3    | 49.8   |

... continued on next page ...

Table S30: ... continued from previous page ...

| Species                                       | Ref.                | OM2    | OM2-D3T | ODM2   | OM3    | OM3-D3T | ODM3   |
|-----------------------------------------------|---------------------|--------|---------|--------|--------|---------|--------|
| H+C2F2→CH+CF2                                 | 43.1 <sup>a</sup>   | 26.1   | 26.3    | 24.3   | 31.6   | 31.9    | 35.3   |
| H+HCCF→HF+C2H                                 | -9.3 <sup>a</sup>   | -2.2   | -2.1    | -12.2  | -4.2   | -4.0    | -5.2   |
| H+C2H2→CH+CH2                                 | 130.6 <sup>a</sup>  | 125.3  | 125.5   | 120.9  | 121.1  | 121.4   | 118.6  |
| H+CF2→CH+F2                                   | 135.5 <sup>a</sup>  | 146.3  | 146.4   | 136.9  | 146.0  | 146.2   | 135.5  |
| H+CF2→HF+CF                                   | -15.6 <sup>a</sup>  | -5.6   | -5.5    | -14.2  | -8.7   | -8.5    | -13.6  |
| H+CH2 ( <sup>3</sup> B <sub>1</sub> )→CH+H2   | -3.0 <sup>a</sup>   | -6.2   | -6.1    | -4.1   | -3.8   | -3.7    | -5.2   |
| H+CF→HF+C                                     | -8.9 <sup>a</sup>   | 4.7    | 4.8     | -9.0   | 1.9    | 2.0     | -6.4   |
| H+CF→CH+F                                     | 48.5 <sup>a</sup>   | 54.5   | 54.5    | 44.8   | 52.5   | 52.5    | 42.0   |
| H+F2→HF+F                                     | -102.6 <sup>a</sup> | -97.5  | -97.4   | -106.4 | -102.2 | -102.2  | -107.1 |
| H+O2→OH+O                                     | 13.6 <sup>a</sup>   | 9.6    | 9.6     | 4.8    | 15.1   | 15.2    | 8.5    |
| H+N2→NH+N                                     | 145.4 <sup>a</sup>  | 143.5  | 143.5   | 139.3  | 128.7  | 128.8   | 130.1  |
| C+CH3F→CF+CH3                                 | -17.6 <sup>a</sup>  | -24.7  | -24.6   | -21.4  | -26.9  | -26.7   | -20.0  |
| C+FOOF→CF+FOO                                 | -115.1 <sup>a</sup> | -109.3 | -109.2  | -106.3 | -120.0 | -119.9  | -114.6 |
| C+FOOF→CO+FOF                                 | -201.1 <sup>a</sup> | -196.1 | -196.0  | -195.7 | -200.9 | -200.8  | -197.0 |
| C+FOO→CO+OF                                   | -178.1 <sup>a</sup> | -181.1 | -181.1  | -180.1 | -178.6 | -178.6  | -175.5 |
| C+FOO→CF+O2                                   | -118.8 <sup>a</sup> | -137.9 | -137.8  | -135.0 | -142.1 | -142.0  | -135.0 |
| C+FOF→CF+OF                                   | -92.0 <sup>a</sup>  | -94.3  | -94.3   | -90.7  | -97.7  | -97.6   | -93.1  |
| C+FOF→CO+F2                                   | -205.0 <sup>a</sup> | -192.3 | -192.3  | -194.3 | -194.9 | -194.9  | -191.9 |
| C+HOF→CO+HF                                   | -242.7 <sup>a</sup> | -232.6 | -232.6  | -239.1 | -237.6 | -237.6  | -234.8 |
| C+OF→CF+O                                     | -79.7 <sup>a</sup>  | -89.3  | -89.3   | -87.5  | -90.1  | -90.2   | -86.0  |
| C+OF→CO+F                                     | -206.7 <sup>a</sup> | -200.2 | -200.3  | -201.0 | -201.3 | -201.4  | -199.5 |
| C+O2N→CO+NO                                   | -184.6 <sup>a</sup> | -170.9 | -170.8  | -167.5 | -175.1 | -174.9  | -169.8 |
| C+O2N→CN+O2                                   | -74.3 <sup>a</sup>  | -62.9  | -62.8   | -61.1  | -71.8  | -71.7   | -69.4  |
| C+N2O→CO+N2                                   | -217.4 <sup>a</sup> | -211.8 | -211.7  | -207.8 | -213.3 | -213.1  | -205.0 |
| C+N2O→CN+NO                                   | -63.2 <sup>a</sup>  | -60.3  | -60.2   | -58.9  | -87.2  | -87.1   | -79.6  |
| C+trans-HONO→CO+HNO                           | -153.0 <sup>a</sup> | -152.0 | -151.9  | -153.0 | -155.8 | -155.6  | -150.5 |
| C+trans-HONO→CN+HO2                           | -44.2 <sup>a</sup>  | -45.3  | -45.2   | -45.1  | -43.6  | -43.4   | -43.1  |
| C+HNCO→CN+HCO                                 | -26.0 <sup>a</sup>  | -53.7  | -53.5   | -48.9  | -56.7  | -56.5   | -50.3  |
| C+HNCO→CO+HCN                                 | -138.4 <sup>a</sup> | -158.1 | -157.9  | -152.2 | -148.5 | -148.3  | -140.8 |
| C+HNO→CN+OH                                   | -82.7 <sup>a</sup>  | -74.3  | -74.3   | -73.4  | -72.3  | -72.3   | -76.7  |
| C+NO→CN+O                                     | -28.6 <sup>a</sup>  | -24.5  | -24.6   | -26.2  | -23.5  | -23.6   | -26.1  |
| C+NO→CO+N                                     | -107.0 <sup>a</sup> | -100.5 | -100.5  | -98.1  | -92.1  | -92.1   | -87.8  |
| C+oxirene→CO+C2H2                             | -209.2 <sup>a</sup> | -199.7 | -199.6  | -200.2 | -199.2 | -199.0  | -199.4 |
| C+oxirane→CO+C2H4                             | -172.3 <sup>a</sup> | -163.1 | -163.0  | -163.8 | -166.7 | -166.5  | -166.8 |
| C+methanol→CO+CH4                             | -166.7 <sup>a</sup> | -160.5 | -160.3  | -158.4 | -159.6 | -159.4  | -156.1 |
| C+trans-HCOH→CO+CH2                           | -128.0 <sup>a</sup> | -107.2 | -107.1  | -104.5 | -110.8 | -110.7  | -110.8 |
| C+formic acid→CO+trans-HCOH                   | -80.3 <sup>a</sup>  | -94.4  | -94.2   | -92.3  | -93.5  | -93.2   | -83.4  |
| C+ketene→CO+CH2C                              | -86.2 <sup>a</sup>  | -99.1  | -99.0   | -96.2  | -93.5  | -93.3   | -87.9  |
| C+glyoxal→CO+oxirene                          | -80.7 <sup>a</sup>  | -64.7  | -64.4   | -62.0  | -62.6  | -62.0   | -55.9  |
| C+acetaldehyde→CO+C2H4                        | -146.0 <sup>a</sup> | -132.6 | -132.4  | -130.9 | -129.4 | -129.0  | -125.6 |
| C+F2CO→CO+CF2                                 | -97.9 <sup>a</sup>  | -111.6 | -111.4  | -105.4 | -108.4 | -108.2  | -94.3  |
| C+HF2CO→CF+HCO                                | -8.4 <sup>a</sup>   | -34.5  | -34.4   | -30.1  | -35.8  | -35.6   | -25.4  |
| C+H2CO→CO+CH2 ( <sup>3</sup> B <sub>1</sub> ) | -75.8 <sup>a</sup>  | -66.7  | -66.6   | -65.5  | -67.6  | -67.4   | -62.7  |
| C+HCO→CO+CH                                   | -64.5 <sup>a</sup>  | -49.8  | -49.7   | -51.1  | -48.3  | -48.2   | -48.5  |
| C+CO2→CO+CO                                   | -129.3 <sup>a</sup> | -129.9 | -129.9  | -125.0 | -123.9 | -123.8  | -113.1 |
| C+HCN→CN+CH                                   | 47.9 <sup>a</sup>   | 54.6   | 54.7    | 52.2   | 43.5   | 43.6    | 42.1   |
| C+O3→CO+O2                                    | -233.1 <sup>a</sup> | -224.3 | -224.2  | -222.6 | -240.4 | -240.3  | -238.6 |
| C+H2O2→CO+H2O                                 | -223.6 <sup>a</sup> | -213.5 | -213.4  | -214.1 | -214.5 | -214.4  | -211.4 |
| C+HO2→CO+OH                                   | -191.4 <sup>a</sup> | -181.0 | -181.0  | -181.3 | -184.5 | -184.5  | -184.0 |
| C+H2O→CO+H2                                   | -136.2 <sup>a</sup> | -134.7 | -134.7  | -124.9 | -132.2 | -132.3  | -126.1 |
| C+trans-H2N2→CN+NH2                           | -67.4 <sup>a</sup>  | -55.1  | -55.0   | -58.8  | -57.6  | -57.4   | -66.9  |
| C+C2H3F→CF+C2H3                               | -4.9 <sup>a</sup>   | -19.1  | -18.9   | -15.0  | -20.3  | -20.0   | -13.1  |
| C+HCCF→CF+C2H                                 | -0.4 <sup>a</sup>   | -6.9   | -6.8    | -3.3   | -6.1   | -6.0    | 1.2    |
| C+CF2→2*CF                                    | -6.7 <sup>a</sup>   | -10.3  | -10.3   | -5.2   | -10.6  | -10.5   | -7.2   |
| C+F2→CF+F                                     | -93.7 <sup>a</sup>  | -102.1 | -102.2  | -97.4  | -104.1 | -104.2  | -100.7 |
| C+O2→CO+O                                     | -138.9 <sup>a</sup> | -132.5 | -132.5  | -132.6 | -126.7 | -126.8  | -126.6 |
| C+N2→CN+N                                     | 47.1 <sup>a</sup>   | 51.0   | 50.9    | 50.9   | 34.0   | 33.9    | 37.6   |
| N+FOOF→NO+FOF                                 | -94.2 <sup>a</sup>  | -95.6  | -95.5   | -97.6  | -108.9 | -108.7  | -109.2 |
| N+FOO→NO+OF                                   | -71.1 <sup>a</sup>  | -80.6  | -80.6   | -82.0  | -86.5  | -86.5   | -87.7  |
| N+FOF→NO+F2                                   | -98.0 <sup>a</sup>  | -91.8  | -91.8   | -96.2  | -102.8 | -102.8  | -104.1 |
| N+HOF→NO+HF                                   | -135.7 <sup>a</sup> | -132.1 | -132.1  | -141.0 | -145.5 | -145.5  | -147.0 |
| N+OF→NO+F                                     | -99.7 <sup>a</sup>  | -99.7  | -99.7   | -102.9 | -109.2 | -109.3  | -111.7 |
| N+O2N→NO+NO                                   | -77.6 <sup>a</sup>  | -70.4  | -70.3   | -69.4  | -83.0  | -82.8   | -82.0  |
| N+O2N→N2+O2                                   | -121.4 <sup>a</sup> | -113.9 | -113.8  | -112.0 | -105.8 | -105.7  | -106.9 |
| N+N2O→NO+N2                                   | -110.4 <sup>a</sup> | -111.3 | -111.2  | -109.7 | -121.2 | -121.0  | -117.1 |

... continued on next page ...

Table S30: ... continued from previous page ...

| Species                                       | Ref.                | OM2    | OM2-D3T | ODM2   | OM3    | OM3-D3T | ODM3   |
|-----------------------------------------------|---------------------|--------|---------|--------|--------|---------|--------|
| N+trans-HONO→NO+HNO                           | -46.0 <sup>a</sup>  | -51.4  | -51.3   | -54.9  | -63.7  | -63.5   | -62.7  |
| N+trans-HONO→N2+HO2                           | -91.4 <sup>a</sup>  | -96.3  | -96.1   | -95.9  | -77.6  | -77.3   | -80.6  |
| N+HNCO→N2+HCO                                 | -73.2 <sup>a</sup>  | -104.6 | -104.5  | -99.8  | -90.7  | -90.4   | -87.8  |
| N+HNCO→CN+HNO                                 | 47.5 <sup>a</sup>   | 23.5   | 23.7    | 24.4   | 14.1   | 14.3    | 19.1   |
| N+HNCO→NO+HCN                                 | -31.4 <sup>a</sup>  | -57.6  | -57.4   | -54.1  | -56.4  | -56.2   | -53.0  |
| N+HNO→N2+OH                                   | -129.8 <sup>a</sup> | -125.3 | -125.2  | -124.2 | -106.3 | -106.2  | -114.2 |
| N+NO→N2+O                                     | -75.7 <sup>a</sup>  | -75.5  | -75.5   | -77.1  | -57.4  | -57.5   | -63.7  |
| N+oxirene→NO+C2H2                             | -102.2 <sup>a</sup> | -99.2  | -99.0   | -102.1 | -107.1 | -106.9  | -111.5 |
| N+oxirane→NO+C2H4                             | -65.3 <sup>a</sup>  | -62.6  | -62.4   | -65.6  | -74.6  | -74.4   | -79.0  |
| N+methanol→NO+CH4                             | -59.7 <sup>a</sup>  | -60.0  | -59.8   | -60.3  | -67.6  | -67.3   | -68.2  |
| N+trans-HCOH→CN+H2O                           | -91.8 <sup>a</sup>  | -68.2  | -68.1   | -70.1  | -77.4  | -77.3   | -83.7  |
| N+trans-HCOH→NO+CH2                           | -21.0 <sup>a</sup>  | -6.7   | -6.6    | -6.4   | -18.7  | -18.6   | -23.0  |
| N+formic acid→NO+trans-HCOH                   | 26.7 <sup>a</sup>   | 6.1    | 6.3     | 5.8    | -1.5   | -1.1    | 4.4    |
| N+formic acid→CN+H2O2                         | 51.5 <sup>a</sup>   | 50.9   | 51.1    | 51.6   | 43.5   | 43.9    | 44.3   |
| N+ketene→NO+CH2C                              | 20.8 <sup>a</sup>   | 1.4    | 1.5     | 1.9    | -1.4   | -1.2    | -0.1   |
| N+ketene→CN+H2CO                              | -22.6 <sup>a</sup>  | -27.8  | -27.6   | -28.2  | -31.0  | -30.7   | -34.4  |
| N+glyoxal→NO+oxirene                          | 26.3 <sup>a</sup>   | 35.8   | 36.2    | 36.1   | 29.5   | 30.1    | 31.9   |
| N+glyoxal→CN+formic acid                      | -48.1 <sup>a</sup>  | -26.9  | -26.6   | -30.8  | -31.4  | -30.9   | -36.3  |
| N+acetaldehyde→CN+methanol                    | -17.0 <sup>a</sup>  | -5.7   | -5.3    | -8.1   | -10.7  | -10.2   | -13.2  |
| N+acetaldehyde→NO+C2H4                        | -39.0 <sup>a</sup>  | -32.1  | -31.8   | -32.8  | -37.3  | -36.9   | -37.8  |
| N+F2CO→NO+CF2                                 | 9.1 <sup>a</sup>    | -11.0  | -10.9   | -7.3   | -16.3  | -16.1   | -6.5   |
| N+F2CO→CN+FOF                                 | 145.5 <sup>a</sup>  | 137.7  | 137.8   | 139.4  | 137.4  | 137.7   | 139.3  |
| N+H2CO→NO+CH2 ( <sup>3</sup> B <sub>1</sub> ) | 31.2 <sup>a</sup>   | 33.8   | 33.9    | 32.6   | 24.5   | 24.7    | 25.1   |
| N+H2CO→CN+H2O                                 | -39.7 <sup>a</sup>  | -27.7  | -27.6   | -31.1  | -34.2  | -34.0   | -35.6  |
| N+HCO→NO+CH                                   | 42.5 <sup>a</sup>   | 50.7   | 50.8    | 47.0   | 43.8   | 43.9    | 39.3   |
| N+CO2→NO+CO                                   | -22.3 <sup>a</sup>  | -29.4  | -29.3   | -26.9  | -31.8  | -31.7   | -25.3  |
| N+CO2→CN+O2                                   | 88.0 <sup>a</sup>   | 78.6   | 78.7    | 79.4   | 71.4   | 71.5    | 75.1   |
| N+CO→CN+O                                     | 78.4 <sup>a</sup>   | 76.0   | 76.0    | 71.9   | 68.6   | 68.5    | 61.7   |
| N+CO→NO+C                                     | 107.0 <sup>a</sup>  | 100.5  | 100.5   | 98.1   | 92.1   | 92.1    | 87.8   |
| N+HCN→N2+CH                                   | 0.7 <sup>a</sup>    | 3.7    | 3.7     | 1.4    | 9.5    | 9.6     | 4.5    |
| N+CN→N2+C                                     | -47.1 <sup>a</sup>  | -51.0  | -50.9   | -50.9  | -34.0  | -33.9   | -37.6  |
| N+trans-HO3→NO+HO2                            | -95.0 <sup>a</sup>  | -99.2  | -99.1   | -99.7  | -107.0 | -106.9  | -108.4 |
| N+O3→NO+O2                                    | -126.1 <sup>a</sup> | -123.8 | -123.7  | -124.5 | -148.3 | -148.2  | -150.8 |
| N+H2O2→NO+H2O                                 | -116.6 <sup>a</sup> | -113.0 | -112.9  | -116.0 | -122.4 | -122.3  | -123.6 |
| N+HO2→NO+OH                                   | -84.4 <sup>a</sup>  | -80.4  | -80.4   | -83.2  | -92.5  | -92.4   | -96.2  |
| N+H2O→NO+H2                                   | -29.3 <sup>a</sup>  | -34.2  | -34.2   | -26.8  | -40.2  | -40.2   | -38.3  |
| N+trans-H2N2→N2+NH2                           | -114.5 <sup>a</sup> | -106.1 | -105.9  | -109.6 | -91.6  | -91.4   | -104.5 |
| N+propyne→CN+C2H4                             | -39.8 <sup>a</sup>  | -34.2  | -34.0   | -36.0  | -40.2  | -39.9   | -43.6  |
| N+propene→CN+C2H6                             | -32.9 <sup>a</sup>  | -27.1  | -26.7   | -29.1  | -34.5  | -33.9   | -37.1  |
| N+C2H3F→CN+CH3F                               | -30.4 <sup>a</sup>  | -29.6  | -29.3   | -30.6  | -33.6  | -33.2   | -37.2  |
| N+C2H4→CN+CH4                                 | -37.7 <sup>a</sup>  | -33.5  | -33.2   | -35.7  | -41.0  | -40.5   | -43.7  |
| N+C2H3→CN+CH3                                 | -43.1 <sup>a</sup>  | -35.3  | -35.1   | -37.0  | -40.2  | -39.9   | -44.0  |
| N+C2F2→CN+CF2                                 | -54.0 <sup>a</sup>  | -63.3  | -63.2   | -62.1  | -63.4  | -63.3   | -58.5  |
| N+C2H2→CN+CH2                                 | 33.4 <sup>a</sup>   | 35.9   | 36.0    | 34.5   | 26.1   | 26.3    | 24.8   |
| N+CF2→CN+F2                                   | 38.4 <sup>a</sup>   | 56.9   | 56.9    | 50.5   | 51.0   | 51.0    | 41.7   |
| N+CH2 ( <sup>3</sup> B <sub>1</sub> )→CN+H2   | -100.1 <sup>a</sup> | -95.6  | -95.7   | -90.5  | -98.8  | -98.9   | -99.0  |
| N+CF→CN+F                                     | -48.6 <sup>a</sup>  | -34.9  | -35.0   | -41.6  | -42.5  | -42.7   | -51.8  |
| N+O2→NO+O                                     | -31.9 <sup>a</sup>  | -32.0  | -32.0   | -34.5  | -34.6  | -34.7   | -38.7  |
| O+CH3F→OF+CH3                                 | 62.0 <sup>a</sup>   | 64.5   | 64.7    | 66.1   | 63.3   | 63.5    | 66.0   |
| O+FOOF→OF+FOO                                 | -35.4 <sup>a</sup>  | -20.0  | -19.9   | -18.8  | -29.8  | -29.7   | -28.7  |
| O+FOOF→O2+FOF                                 | -62.2 <sup>a</sup>  | -63.6  | -63.5   | -63.1  | -74.3  | -74.1   | -70.5  |
| O+FOO→O2+OF                                   | -39.2 <sup>a</sup>  | -48.6  | -48.6   | -47.5  | -51.9  | -51.8   | -49.0  |
| O+FOF→OF+OF                                   | -12.4 <sup>a</sup>  | -5.0   | -5.0    | -3.2   | -7.5   | -7.4    | -7.2   |
| O+FOF→O2+F2                                   | -66.1 <sup>a</sup>  | -59.9  | -59.8   | -61.7  | -68.2  | -68.1   | -65.4  |
| O+HOF→O2+HF                                   | -103.8 <sup>a</sup> | -100.1 | -100.1  | -106.5 | -110.9 | -110.9  | -108.3 |
| O+OF→O2+F                                     | -67.8 <sup>a</sup>  | -67.7  | -67.7   | -68.4  | -74.6  | -74.7   | -72.9  |
| O+O2N→O2+NO                                   | -45.7 <sup>a</sup>  | -38.4  | -38.3   | -34.9  | -48.4  | -48.2   | -43.3  |
| O+trans-HONO→O2+HNO                           | -14.1 <sup>a</sup>  | -19.5  | -19.3   | -20.4  | -29.1  | -28.9   | -23.9  |
| O+trans-HONO→NO+HO2                           | -15.6 <sup>a</sup>  | -20.8  | -20.6   | -18.8  | -20.1  | -19.8   | -17.0  |
| O+HNCO→NO+HCO                                 | 2.6 <sup>a</sup>    | -29.2  | -28.9   | -22.7  | -33.3  | -32.9   | -24.2  |
| O+HNCO→CO+HNO                                 | -30.9 <sup>a</sup>  | -52.5  | -52.3   | -47.5  | -54.5  | -54.2   | -42.6  |
| O+HNCO→O2+HCN                                 | 0.5 <sup>a</sup>    | -25.6  | -25.4   | -19.6  | -21.8  | -21.5   | -14.3  |
| O+HNO→NO+OH                                   | -54.1 <sup>a</sup>  | -49.8  | -49.7   | -47.1  | -48.9  | -48.7   | -50.6  |
| O+NO→O2+N                                     | 31.9 <sup>a</sup>   | 32.0   | 32.0    | 34.5   | 34.6   | 34.7    | 38.7   |
| O+oxirene→O2+C2H2                             | -70.3 <sup>a</sup>  | -67.2  | -67.0   | -67.6  | -72.5  | -72.2   | -72.8  |

... continued on next page ...



Table S30: ... continued from previous page ...

| Species                                       | Ref.                | OM2    | OM2-D3T | ODM2   | OM3    | OM3-D3T | ODM3   |
|-----------------------------------------------|---------------------|--------|---------|--------|--------|---------|--------|
| O+oxirane→O2+C2H4                             | -33.4 <sup>a</sup>  | -30.6  | -30.4   | -31.2  | -40.0  | -39.7   | -40.2  |
| O+methanol→O2+CH4                             | -27.7 <sup>a</sup>  | -28.0  | -27.8   | -25.8  | -33.0  | -32.6   | -29.5  |
| O+trans-HCOH→CO+H2O                           | -170.2 <sup>a</sup> | -144.2 | -144.1  | -142.0 | -146.0 | -145.8  | -145.4 |
| O+trans-HCOH→O2+CH2                           | 10.9 <sup>a</sup>   | 25.3   | 25.4    | 28.1   | 15.9   | 16.1    | 15.8   |
| O+formic acid→O2+trans-HCOH                   | 58.6 <sup>a</sup>   | 38.1   | 38.3    | 40.3   | 33.2   | 33.6    | 43.2   |
| O+formic acid→CO+H2O2                         | -26.9 <sup>a</sup>  | -25.1  | -24.9   | -20.3  | -25.1  | -24.6   | -17.4  |
| O+ketene→O2+CH2C                              | 52.7 <sup>a</sup>   | 33.4   | 33.6    | 36.4   | 33.2   | 33.4    | 38.6   |
| O+ketene→CO+H2CO                              | -100.9 <sup>a</sup> | -103.8 | -103.5  | -100.1 | -99.6  | -99.2   | -96.1  |
| O+glyoxal→O2+oxirene                          | 58.2 <sup>a</sup>   | 67.8   | 68.2    | 70.6   | 64.1   | 64.7    | 70.6   |
| O+glyoxal→CO+formic acid                      | -126.5 <sup>a</sup> | -102.9 | -102.6  | -102.7 | -100.0 | -99.4   | -98.0  |
| O+acetaldehyde→CO+methanol                    | -95.4 <sup>a</sup>  | -81.7  | -81.3   | -80.0  | -79.3  | -78.7   | -74.9  |
| O+acetaldehyde→O2+C2H4                        | -7.1 <sup>a</sup>   | -0.1   | 0.2     | 1.7    | -2.7   | -2.3    | 0.9    |
| O+F2CO→O2+CF2                                 | 41.0 <sup>a</sup>   | 20.9   | 21.1    | 27.2   | 18.3   | 18.6    | 32.2   |
| O+F2CO→CO+FOF                                 | 67.1 <sup>a</sup>   | 61.7   | 61.9    | 67.6   | 68.8   | 69.1    | 77.6   |
| O+HFCO→OF+HCO                                 | 71.2 <sup>a</sup>   | 54.7   | 54.9    | 57.4   | 54.4   | 54.6    | 60.5   |
| O+H2CO→O2+CH2 ( <sup>3</sup> B <sub>1</sub> ) | 63.1 <sup>a</sup>   | 65.8   | 65.9    | 67.1   | 59.1   | 59.4    | 63.9   |
| O+H2CO→CO+H2O                                 | -118.0 <sup>a</sup> | -103.7 | -103.5  | -103.0 | -102.8 | -102.5  | -97.3  |
| O+HCO→O2+CH                                   | 74.4 <sup>a</sup>   | 82.7   | 82.8    | 81.5   | 78.4   | 78.5    | 78.0   |
| O+CO2→O2+CO                                   | 9.6 <sup>a</sup>    | 2.6    | 2.7     | 7.6    | 2.8    | 3.0     | 13.4   |
| O+CO→O2+C                                     | 138.9 <sup>a</sup>  | 132.5  | 132.5   | 132.6  | 126.7  | 126.8   | 126.6  |
| O+HCN→NO+CH                                   | 76.5 <sup>a</sup>   | 79.1   | 79.2    | 78.5   | 67.0   | 67.1    | 68.2   |
| O+CN→CO+N                                     | -78.4 <sup>a</sup>  | -76.0  | -76.0   | -71.9  | -68.6  | -68.5   | -61.7  |
| O+CN→NO+C                                     | 28.6 <sup>a</sup>   | 24.5   | 24.6    | 26.2   | 23.5   | 23.6    | 26.1   |
| O+trans-HO3→O2+HO2                            | -63.1 <sup>a</sup>  | -67.2  | -67.1   | -65.2  | -72.4  | -72.2   | -69.6  |
| O+O3→O2+O2                                    | -94.2 <sup>a</sup>  | -91.8  | -91.7   | -90.1  | -113.7 | -113.5  | -112.0 |
| O+H2O2→O2+H2O                                 | -84.7 <sup>a</sup>  | -81.0  | -80.9   | -81.5  | -87.8  | -87.6   | -84.9  |
| O+HO2→O2+OH                                   | -52.5 <sup>a</sup>  | -48.5  | -48.4   | -48.7  | -57.9  | -57.8   | -57.5  |
| O+H2O→O2+H2                                   | 2.7 <sup>a</sup>    | -2.2   | -2.2    | 7.7    | -5.5   | -5.5    | 0.5    |
| O+trans-H2N2→NO+NH2                           | -38.8 <sup>a</sup>  | -30.6  | -30.4   | -32.5  | -34.2  | -33.9   | -40.8  |
| O+propyne→CO+C2H4                             | -118.2 <sup>a</sup> | -110.2 | -110.0  | -107.9 | -108.8 | -108.5  | -105.3 |
| O+propyne→CO+C2H6                             | -111.2 <sup>a</sup> | -103.1 | -102.6  | -101.0 | -103.1 | -102.4  | -98.8  |
| O+C2H3F→OF+C2H3                               | 74.7 <sup>a</sup>   | 70.2   | 70.4    | 72.5   | 69.8   | 70.2    | 72.8   |
| O+C2H3F→CO+CH3F                               | -108.8 <sup>a</sup> | -105.6 | -105.3  | -102.5 | -102.3 | -101.7  | -98.9  |
| O+C2H4→CO+CH4                                 | -116.0 <sup>a</sup> | -109.6 | -109.2  | -107.5 | -109.6 | -109.0  | -105.4 |
| O+C2H3→CO+CH3                                 | -121.5 <sup>a</sup> | -111.3 | -111.0  | -108.9 | -108.8 | -108.4  | -105.7 |
| O+C2F2→CO+CF2                                 | -132.4 <sup>a</sup> | -139.3 | -139.2  | -133.9 | -132.0 | -131.8  | -120.2 |
| O+HCCF→OF+C2H                                 | 79.2 <sup>a</sup>   | 82.4   | 82.5    | 84.2   | 84.0   | 84.2    | 87.1   |
| O+C2H2→CO+CH2                                 | -45.0 <sup>a</sup>  | -40.2  | -40.0   | -37.4  | -42.5  | -42.3   | -36.9  |
| O+CF2→CO+F2                                   | -40.0 <sup>a</sup>  | -19.1  | -19.1   | -21.3  | -17.7  | -17.6   | -20.0  |
| O+CF2→OF+CF                                   | 73.0 <sup>a</sup>   | 78.9   | 79.0    | 82.3   | 79.6   | 79.7    | 78.8   |
| O+CH2 ( <sup>3</sup> B <sub>1</sub> )→CO+H2   | -178.5 <sup>a</sup> | -171.7 | -171.6  | -162.4 | -167.5 | -167.4  | -160.7 |
| O+CF→OF+C                                     | 79.7 <sup>a</sup>   | 89.3   | 89.3    | 87.5   | 90.1   | 90.2    | 86.0   |
| O+CF→CO+F                                     | -127.0 <sup>a</sup> | -110.9 | -111.0  | -113.5 | -111.2 | -111.2  | -113.5 |
| O+F2→OF+F                                     | -14.0 <sup>a</sup>  | -12.9  | -12.9   | -9.9   | -13.9  | -14.0   | -14.7  |
| O+N2→NO+N                                     | 75.7 <sup>a</sup>   | 75.5   | 75.5    | 77.1   | 57.4   | 57.5    | 63.7   |
| F+CH3F→F2+CH3                                 | 76.0 <sup>a</sup>   | 77.4   | 77.6    | 76.0   | 77.2   | 77.5    | 80.7   |
| F+FOOF→F2+FOO                                 | -21.4 <sup>a</sup>  | -7.1   | -7.0    | -8.9   | -15.9  | -15.7   | -13.9  |
| F+FOOF→OF+FOF                                 | 5.5 <sup>a</sup>    | 4.1    | 4.2     | 5.3    | 0.4    | 0.6     | 2.5    |
| F+FOO→OF+OF                                   | 28.6 <sup>a</sup>   | 19.1   | 19.2    | 20.9   | 22.7   | 22.9    | 24.0   |
| F+FOO→F2+O2                                   | -25.1 <sup>a</sup>  | -35.7  | -35.6   | -37.6  | -38.0  | -37.8   | -34.3  |
| F+FOF→F2+OF                                   | 1.7 <sup>a</sup>    | 7.9    | 7.9     | 6.7    | 6.4    | 6.6     | 7.6    |
| F+HOF→OF+HF                                   | -36.1 <sup>a</sup>  | -32.4  | -32.3   | -38.1  | -36.3  | -36.2   | -35.3  |
| F+OF→F2+O                                     | 14.0 <sup>a</sup>   | 12.9   | 12.9    | 9.9    | 13.9   | 14.0    | 14.7   |
| F+O2N→OF+NO                                   | 22.1 <sup>a</sup>   | 29.3   | 29.4    | 33.5   | 26.2   | 26.5    | 29.7   |
| F+N2O→OF+N2                                   | -10.7 <sup>a</sup>  | -11.6  | -11.4   | -6.9   | -12.0  | -11.7   | -5.5   |
| F+trans-HONO→OF+HNO                           | 53.7 <sup>a</sup>   | 48.2   | 48.4    | 48.0   | 45.5   | 45.8    | 49.0   |
| F+HNCO→CF+HNO                                 | 96.1 <sup>a</sup>   | 58.5   | 58.7    | 66.0   | 56.6   | 57.0    | 70.9   |
| F+HNCO→OF+HCN                                 | 68.2 <sup>a</sup>   | 42.1   | 42.3    | 48.7   | 52.8   | 53.1    | 58.7   |
| F+NO→OF+N                                     | 99.7 <sup>a</sup>   | 99.7   | 99.7    | 102.9  | 109.2  | 109.3   | 111.7  |
| F+oxirene→OF+C2H2                             | -2.5 <sup>a</sup>   | 0.5    | 0.7     | 0.8    | 2.1    | 2.5     | 0.1    |
| F+oxirane→OF+C2H4                             | 34.4 <sup>a</sup>   | 37.1   | 37.3    | 37.2   | 34.6   | 34.9    | 32.7   |
| F+methanol→OF+CH4                             | 40.0 <sup>a</sup>   | 39.7   | 40.0    | 42.5   | 41.7   | 42.1    | 43.4   |
| F+trans-HCOH→CF+H2O                           | -43.2 <sup>a</sup>  | -33.3  | -33.1   | -28.5  | -34.9  | -34.6   | -31.9  |
| F+trans-HCOH→OF+CH2                           | 78.7 <sup>a</sup>   | 93.0   | 93.1    | 96.4   | 90.5   | 90.8    | 88.7   |
| F+formic acid→OF+trans-HCOH                   | 126.3 <sup>a</sup>  | 105.8  | 106.0   | 108.6  | 107.8  | 108.2   | 116.1  |

... continued on next page ...

Table S30: ... continued from previous page ...

| Species                                       | Ref.               | OM2   | OM2-D3T | ODM2  | OM3   | OM3-D3T | ODM3  |
|-----------------------------------------------|--------------------|-------|---------|-------|-------|---------|-------|
| F+formic acid→CF+H2O2                         | 100.1 <sup>a</sup> | 85.8  | 86.1    | 93.2  | 86.1  | 86.6    | 96.1  |
| F+ketene→OF+CH2C                              | 120.5 <sup>a</sup> | 101.1 | 101.3   | 104.7 | 107.8 | 108.1   | 111.6 |
| F+ketene→CF+H2CO                              | 26.1 <sup>a</sup>  | 7.2   | 7.5     | 13.4  | 11.6  | 12.0    | 17.4  |
| F+glyoxal→OF+oxirene                          | 126.0 <sup>a</sup> | 135.5 | 135.9   | 139.0 | 138.7 | 139.4   | 143.6 |
| F+glyoxal→CF+formic acid                      | 0.5 <sup>a</sup>   | 8.0   | 8.4     | 10.8  | 11.2  | 11.8    | 15.5  |
| F+acetaldehyde→CF+methanol                    | 31.6 <sup>a</sup>  | 29.2  | 29.7    | 33.5  | 31.8  | 32.5    | 38.6  |
| F+acetaldehyde→OF+C2H4                        | 60.7 <sup>a</sup>  | 67.6  | 67.9    | 70.1  | 71.9  | 72.4    | 73.9  |
| F+F2CO→OF+CF2                                 | 108.8 <sup>a</sup> | 88.6  | 88.9    | 95.6  | 92.9  | 93.3    | 105.2 |
| F+F2CO→CF+FOF                                 | 194.1 <sup>a</sup> | 172.6 | 172.9   | 181.1 | 180.0 | 180.4   | 191.1 |
| F+HF2CO→F2+HCO                                | 85.3 <sup>a</sup>  | 67.6  | 67.8    | 67.3  | 68.3  | 68.6    | 75.3  |
| F+H2CO→OF+CH2 ( <sup>3</sup> B <sub>1</sub> ) | 130.8 <sup>a</sup> | 133.5 | 133.7   | 135.5 | 133.7 | 134.0   | 136.8 |
| F+H2CO→CF+H2O                                 | 9.0 <sup>a</sup>   | 7.2   | 7.4     | 10.5  | 8.4   | 8.7     | 16.2  |
| F+HCO→OF+CH                                   | 142.1 <sup>a</sup> | 150.4 | 150.5   | 149.9 | 153.0 | 153.2   | 151.0 |
| F+CO2→OF+CO                                   | 77.3 <sup>a</sup>  | 70.3  | 70.4    | 75.9  | 77.4  | 77.7    | 86.4  |
| F+CO2→CF+O2                                   | 136.6 <sup>a</sup> | 113.5 | 113.7   | 121.0 | 114.0 | 114.2   | 127.0 |
| F+CO→CF+O                                     | 127.0 <sup>a</sup> | 110.9 | 111.0   | 113.5 | 111.2 | 111.2   | 113.5 |
| F+CO→OF+C                                     | 206.7 <sup>a</sup> | 200.2 | 200.3   | 201.0 | 201.3 | 201.4   | 199.5 |
| F+CN→CF+N                                     | 48.6 <sup>a</sup>  | 34.9  | 35.0    | 41.6  | 42.5  | 42.7    | 51.8  |
| F+trans-HO3→OF+HO2                            | 4.7 <sup>a</sup>   | 0.5   | 0.7     | 3.1   | 2.2   | 2.4     | 3.3   |
| F+O3→OF+O2                                    | -26.5 <sup>a</sup> | -24.1 | -24.0   | -21.7 | -39.1 | -38.9   | -39.1 |
| F+H2O2→OF+H2O                                 | -17.0 <sup>a</sup> | -13.3 | -13.2   | -13.1 | -13.1 | -12.9   | -11.9 |
| F+H2O→OF+H2                                   | 70.4 <sup>a</sup>  | 65.5  | 65.6    | 76.1  | 69.1  | 69.2    | 73.4  |
| F+propyne→CF+C2H4                             | 8.8 <sup>a</sup>   | 0.7   | 1.0     | 5.6   | 2.4   | 2.8     | 8.2   |
| F+propene→CF+C2H6                             | 15.8 <sup>a</sup>  | 7.8   | 8.3     | 12.5  | 8.1   | 8.8     | 14.8  |
| F+C2H3F→F2+C2H3                               | 88.8 <sup>a</sup>  | 83.1  | 83.3    | 82.4  | 83.8  | 84.2    | 87.5  |
| F+C2H3F→CF+C2H3F                              | 18.2 <sup>a</sup>  | 5.3   | 5.7     | 11.0  | 8.9   | 9.5     | 14.6  |
| F+C2H4→CF+CH4                                 | 11.0 <sup>a</sup>  | 1.4   | 1.8     | 6.0   | 1.6   | 2.2     | 8.1   |
| F+C2H3→CF+CH3                                 | 5.5 <sup>a</sup>   | -0.3  | -0.0    | 4.6   | 2.4   | 2.8     | 7.8   |
| F+C2F2→CF+CF2                                 | -5.4 <sup>a</sup>  | -28.4 | -28.2   | -20.4 | -20.9 | -20.6   | -6.6  |
| F+HCCF→F2+C2H                                 | 93.3 <sup>a</sup>  | 95.3  | 95.4    | 94.1  | 98.0  | 98.2    | 101.8 |
| F+C2H2→CF+CH2                                 | 82.1 <sup>a</sup>  | 70.8  | 71.0    | 76.1  | 68.6  | 68.9    | 76.6  |
| F+CF2→F2+CF                                   | 87.0 <sup>a</sup>  | 91.8  | 91.9    | 92.2  | 93.5  | 93.7    | 93.5  |
| F+CH2 ( <sup>3</sup> B <sub>1</sub> )→CF+H2   | -51.5 <sup>a</sup> | -60.7 | -60.6   | -48.9 | -56.3 | -56.2   | -47.2 |
| F+CF→F2+C                                     | 93.7 <sup>a</sup>  | 102.1 | 102.2   | 97.4  | 104.1 | 104.2   | 100.7 |
| F+O2→OF+O                                     | 67.8 <sup>a</sup>  | 67.7  | 67.7    | 68.4  | 74.6  | 74.7    | 72.9  |
| OH+CH3F→HOF+CH3                               | 63.6 <sup>a</sup>  | 70.5  | 70.6    | 71.3  | 70.9  | 71.0    | 73.4  |
| OH+FOOF→HOF+FOO                               | -33.8 <sup>a</sup> | -14.1 | -14.0   | -13.6 | -22.3 | -22.2   | -21.2 |
| OH+FOOF→HO2+FOF                               | -9.7 <sup>a</sup>  | -15.2 | -15.1   | -14.4 | -16.4 | -16.3   | -13.0 |
| OH+FOO→HO2+OF                                 | 13.3 <sup>a</sup>  | -0.2  | -0.1    | 1.2   | 5.9   | 6.0     | 8.5   |
| OH+FOO→HOF+O2                                 | -37.5 <sup>a</sup> | -42.7 | -42.7   | -42.3 | -44.4 | -44.3   | -41.6 |
| OH+FOF→HOF+OF                                 | -10.7 <sup>a</sup> | 0.9   | 0.9     | 2.0   | 0.1   | 0.1     | 0.3   |
| OH+FOF→HO2+F2                                 | -13.6 <sup>a</sup> | -11.4 | -11.4   | -13.0 | -10.3 | -10.3   | -7.9  |
| OH+HOF→HO2+HF                                 | -51.3 <sup>a</sup> | -51.6 | -51.6   | -57.8 | -53.0 | -53.1   | -50.8 |
| OH+OF→HOF+O                                   | 1.6 <sup>a</sup>   | 5.9   | 5.9     | 5.2   | 7.6   | 7.5     | 7.4   |
| OH+OF→HO2+F                                   | -15.2 <sup>a</sup> | -19.2 | -19.3   | -19.7 | -16.8 | -16.9   | -15.4 |
| OH+O2N→HO2+NO                                 | 6.8 <sup>a</sup>   | 10.1  | 10.1    | 13.8  | 9.5   | 9.6     | 14.2  |
| OH+O2N→HNO+O2                                 | 8.4 <sup>a</sup>   | 11.4  | 11.4    | 12.2  | 0.5   | 0.6     | 7.3   |
| OH+N2O→HO2+N2                                 | -26.0 <sup>a</sup> | -30.8 | -30.7   | -26.6 | -28.7 | -28.6   | -20.9 |
| OH+N2O→HNO+NO                                 | 19.4 <sup>a</sup>  | 14.0  | 14.1    | 14.5  | -14.9 | -14.7   | -2.9  |
| OH+trans-HONO→HO2+HNO                         | 38.4 <sup>a</sup>  | 29.0  | 29.1    | 28.3  | 28.8  | 28.9    | 33.6  |
| OH+HNCO→HCO+HNO                               | 56.6 <sup>a</sup>  | 20.7  | 20.8    | 24.5  | 15.6  | 15.8    | 26.4  |
| OH+HNCO→HO2+HCN                               | 53.0 <sup>a</sup>  | 22.9  | 23.0    | 29.0  | 36.0  | 36.2    | 43.2  |
| OH+NO→HNO+O                                   | 54.1 <sup>a</sup>  | 49.8  | 49.7    | 47.1  | 48.9  | 48.7    | 50.6  |
| OH+NO→HO2+N                                   | 84.4 <sup>a</sup>  | 80.4  | 80.4    | 83.2  | 92.5  | 92.4    | 96.2  |
| OH+oxirene→HO2+C2H2                           | -17.8 <sup>a</sup> | -18.8 | -18.6   | -18.9 | -14.7 | -14.4   | -15.3 |
| OH+oxirane→HO2+C2H4                           | 19.1 <sup>a</sup>  | 17.9  | 18.0    | 17.5  | 17.8  | 18.0    | 17.3  |
| OH+methanol→HO2+CH4                           | 24.8 <sup>a</sup>  | 20.5  | 20.7    | 22.9  | 24.9  | 25.2    | 28.0  |
| OH+trans-HCOH→HCO+H2O                         | -82.7 <sup>a</sup> | -71.1 | -71.0   | -70.1 | -75.9 | -75.8   | -76.4 |
| OH+trans-HCOH→HO2+CH2                         | 63.4 <sup>a</sup>  | 73.7  | 73.8    | 76.8  | 73.8  | 73.9    | 73.3  |
| OH+formic acid→HO2+trans-HCO                  | 111.1 <sup>a</sup> | 86.5  | 86.7    | 88.9  | 91.0  | 91.3    | 100.7 |
| OH+formic acid→HCO+H2O2                       | 60.6 <sup>a</sup>  | 48.0  | 48.2    | 51.7  | 45.1  | 45.4    | 51.6  |
| OH+ketene→HO2+CH2C                            | 105.2 <sup>a</sup> | 81.9  | 82.0    | 85.0  | 91.0  | 91.2    | 96.1  |
| OH+ketene→HCO+H2CO                            | -13.4 <sup>a</sup> | -30.6 | -30.5   | -28.2 | -29.5 | -29.2   | -27.1 |
| OH+glyoxal→HO2+oxirene                        | 110.7 <sup>a</sup> | 116.2 | 116.6   | 119.3 | 122.0 | 122.5   | 128.1 |
| OH+glyoxal→HCO+formic acid                    | -39.0 <sup>a</sup> | -29.8 | -29.5   | -30.7 | -29.8 | -29.4   | -29.0 |

... continued on next page ...

Table S30: ... continued from previous page ...

| Species                                         | Ref.               | OM2   | OM2-D3T | ODM2  | OM3   | OM3-D3T | ODM3  |
|-------------------------------------------------|--------------------|-------|---------|-------|-------|---------|-------|
| OH+acetaldehyde→HCO+methanol                    | -7.8 <sup>a</sup>  | -8.6  | -8.2    | -8.1  | -9.2  | -8.7    | -5.9  |
| OH+acetaldehyde→HO2+C2H4                        | 45.4 <sup>a</sup>  | 48.3  | 48.6    | 50.4  | 55.1  | 55.5    | 58.4  |
| OH+F2CO→HO2+CF2                                 | 93.5 <sup>a</sup>  | 69.4  | 69.5    | 75.9  | 76.2  | 76.4    | 89.7  |
| OH+F2CO→HCO+FOF                                 | 154.6 <sup>a</sup> | 134.8 | 134.9   | 139.5 | 139.0 | 139.2   | 146.6 |
| OH+HFCO→HOF+HCO                                 | 72.9 <sup>a</sup>  | 60.7  | 60.8    | 62.6  | 61.9  | 62.1    | 68.0  |
| OH+H2CO→HO2+CH2 ( <sup>3</sup> B <sub>1</sub> ) | 115.6 <sup>a</sup> | 114.2 | 114.3   | 115.8 | 117.0 | 117.1   | 121.4 |
| OH+H2CO→HCO+H2O                                 | -30.5 <sup>a</sup> | -30.6 | -30.5   | -31.0 | -32.6 | -32.5   | -28.3 |
| OH+HCO→HO2+CH                                   | 126.9 <sup>a</sup> | 131.2 | 131.2   | 130.2 | 136.3 | 136.3   | 135.5 |
| OH+CO2→HO2+CO                                   | 62.1 <sup>a</sup>  | 51.0  | 51.1    | 56.2  | 60.7  | 60.8    | 70.9  |
| OH+CO2→HCO+O2                                   | 97.1 <sup>a</sup>  | 75.7  | 75.8    | 79.5  | 73.0  | 73.0    | 82.4  |
| OH+CO→HCO+O                                     | 87.5 <sup>a</sup>  | 73.1  | 73.1    | 71.9  | 70.2  | 70.0    | 69.0  |
| OH+CO→HO2+C                                     | 191.4 <sup>a</sup> | 181.0 | 181.0   | 181.3 | 184.5 | 184.5   | 184.0 |
| OH+HCN→HNO+CH                                   | 130.5 <sup>a</sup> | 128.9 | 129.0   | 125.6 | 115.9 | 115.9   | 118.7 |
| OH+CN→HCO+N                                     | 9.1 <sup>a</sup>   | -2.9  | -2.9    | 0.1   | 1.5   | 1.5     | 7.3   |
| OH+CN→HNO+C                                     | 82.7 <sup>a</sup>  | 74.3  | 74.3    | 73.4  | 72.3  | 72.3    | 76.7  |
| OH+trans-HO3→HO2+HO2                            | -10.6 <sup>a</sup> | -18.7 | -18.7   | -16.5 | -14.6 | -14.5   | -12.2 |
| OH+O3→HO2+O2                                    | -41.7 <sup>a</sup> | -43.3 | -43.3   | -41.4 | -55.8 | -55.8   | -54.5 |
| OH+H2O2→HO2+H2O                                 | -32.2 <sup>a</sup> | -32.5 | -32.5   | -32.8 | -29.9 | -29.8   | -27.4 |
| OH+H2O→HO2+H2                                   | 55.2 <sup>a</sup>  | 46.3  | 46.3    | 56.4  | 52.3  | 52.3    | 58.0  |
| OH+trans-H2N2→HNO+NH2                           | 15.3 <sup>a</sup>  | 19.2  | 19.3    | 14.6  | 14.7  | 14.9    | 9.7   |
| OH+propyne→HCO+C2H4                             | -30.7 <sup>a</sup> | -37.1 | -36.9   | -36.0 | -38.7 | -38.4   | -36.3 |
| OH+propene→HCO+C2H6                             | -23.7 <sup>a</sup> | -30.0 | -29.6   | -29.1 | -33.0 | -32.4   | -29.8 |
| OH+C2H3F→HOF+C2H3                               | 76.4 <sup>a</sup>  | 76.1  | 76.3    | 77.7  | 77.4  | 77.7    | 80.2  |
| OH+C2H3F→HCO+CH3F                               | -21.3 <sup>a</sup> | -32.5 | -32.2   | -30.6 | -32.1 | -31.7   | -29.9 |
| OH+C2H4→HCO+CH4                                 | -28.5 <sup>a</sup> | -36.4 | -36.1   | -35.6 | -39.4 | -39.0   | -36.4 |
| OH+C2H3→HCO+CH3                                 | -34.0 <sup>a</sup> | -38.1 | -38.0   | -36.9 | -38.7 | -38.4   | -36.7 |
| OH+C2F2→HCO+CF2                                 | -44.9 <sup>a</sup> | -66.2 | -66.1   | -62.0 | -61.9 | -61.8   | -51.2 |
| OH+HCCF→HOF+C2H                                 | 80.9 <sup>a</sup>  | 88.3  | 88.4    | 89.4  | 91.6  | 91.7    | 94.6  |
| OH+C2H2→HCO+CH2                                 | 42.6 <sup>a</sup>  | 33.0  | 33.1    | 34.6  | 27.6  | 27.8    | 32.1  |
| OH+CF2→HCO+F2                                   | 47.5 <sup>a</sup>  | 54.0  | 54.0    | 50.6  | 52.5  | 52.5    | 49.0  |
| OH+CF2→HOF+CF                                   | 74.6 <sup>a</sup>  | 84.9  | 84.9    | 87.5  | 87.1  | 87.2    | 86.2  |
| OH+CH2 ( <sup>3</sup> B <sub>1</sub> )→HCO+H2   | -91.0 <sup>a</sup> | -98.5 | -98.5   | -90.5 | -97.3 | -97.4   | -91.7 |
| OH+CF→HOF+C                                     | 81.3 <sup>a</sup>  | 95.2  | 95.2    | 92.7  | 97.7  | 97.7    | 93.4  |
| OH+CF→HCO+F                                     | -39.5 <sup>a</sup> | -37.8 | -37.9   | -41.6 | -41.0 | -41.2   | -44.5 |
| OH+F2→HOF+F                                     | -12.4 <sup>a</sup> | -6.9  | -7.0    | -4.7  | -6.4  | -6.5    | -7.3  |
| OH+O2→HO2+O                                     | 52.5 <sup>a</sup>  | 48.5  | 48.4    | 48.7  | 57.9  | 57.8    | 57.5  |
| OH+N2→HNO+N                                     | 129.8 <sup>a</sup> | 125.3 | 125.2   | 124.2 | 106.3 | 106.2   | 114.2 |
| OF+CH3F→FOF+CH3                                 | 74.4 <sup>a</sup>  | 69.6  | 69.6    | 69.3  | 70.8  | 70.9    | 73.1  |
| OF+FOOF→FOF+FOO                                 | -23.1 <sup>a</sup> | -15.0 | -14.9   | -15.6 | -22.3 | -22.3   | -21.5 |
| OF+FOO→FOF+O2                                   | -26.8 <sup>a</sup> | -43.6 | -43.6   | -44.3 | -44.4 | -44.4   | -41.8 |
| OF+FOF→FOO+F2                                   | -26.9 <sup>a</sup> | -11.2 | -11.2   | -14.2 | -16.3 | -16.3   | -16.4 |
| OF+HOF→FOO+HF                                   | -64.6 <sup>a</sup> | -51.5 | -51.5   | -59.0 | -59.0 | -59.0   | -59.3 |
| OF+OF→FOF+O                                     | 12.4 <sup>a</sup>  | 5.0   | 5.0     | 3.2   | 7.5   | 7.4     | 7.2   |
| OF+OF→FOO+F                                     | -28.6 <sup>a</sup> | -19.1 | -19.2   | -20.9 | -22.7 | -22.9   | -24.0 |
| OF+O2N→FOO+NO                                   | -6.5 <sup>a</sup>  | 10.2  | 10.3    | 12.6  | 3.5   | 3.6     | 5.7   |
| OF+N2O→FOO+N2                                   | -39.3 <sup>a</sup> | -30.7 | -30.6   | -27.8 | -34.7 | -34.5   | -29.4 |
| OF+trans-HONO→FOO+HNO                           | 25.1 <sup>a</sup>  | 29.2  | 29.2    | 27.1  | 22.8  | 22.9    | 25.1  |
| OF+HNCO→FOO+HCN                                 | 39.7 <sup>a</sup>  | 23.1  | 23.2    | 27.8  | 30.1  | 30.3    | 34.7  |
| OF+NO→FOO+N                                     | 71.1 <sup>a</sup>  | 80.6  | 80.6    | 82.0  | 86.5  | 86.5    | 87.7  |
| OF+oxirene→FOO+C2H2                             | -31.1 <sup>a</sup> | -18.6 | -18.5   | -20.1 | -20.6 | -20.4   | -23.8 |
| OF+oxirane→FOO+C2H4                             | 5.8 <sup>a</sup>   | 18.0  | 18.1    | 16.3  | 11.9  | 12.1    | 8.7   |
| OF+methanol→FOO+CH4                             | 11.4 <sup>a</sup>  | 20.7  | 20.8    | 21.6  | 19.0  | 19.2    | 19.5  |
| OF+trans-HCOH→FOO+CH2                           | 50.1 <sup>a</sup>  | 73.9  | 74.0    | 75.5  | 67.8  | 67.9    | 64.7  |
| OF+formic acid→FOO+trans-HCO                    | 97.8 <sup>a</sup>  | 86.7  | 86.9    | 87.7  | 85.1  | 85.4    | 92.1  |
| OF+ketene→FOO+CH2C                              | 91.9 <sup>a</sup>  | 82.0  | 82.1    | 83.8  | 85.1  | 85.2    | 87.6  |
| OF+glyoxal→FOO+oxirene                          | 97.4 <sup>a</sup>  | 116.4 | 116.7   | 118.1 | 116.0 | 116.5   | 119.6 |
| OF+acetaldehyde→FOO+C2H4                        | 32.1 <sup>a</sup>  | 48.5  | 48.7    | 49.2  | 49.2  | 49.5    | 49.9  |
| OF+F2CO→FOO+CF2                                 | 80.2 <sup>a</sup>  | 69.6  | 69.7    | 74.7  | 70.2  | 70.4    | 81.2  |
| OF+HFCO→FOF+HCO                                 | 83.6 <sup>a</sup>  | 59.8  | 59.9    | 60.6  | 61.9  | 62.0    | 67.7  |
| OF+H2CO→FOO+CH2 ( <sup>3</sup> B <sub>1</sub> ) | 102.3 <sup>a</sup> | 114.4 | 114.5   | 114.6 | 111.0 | 111.2   | 112.9 |
| OF+HCO→FOO+CH                                   | 113.6 <sup>a</sup> | 131.4 | 131.4   | 129.0 | 130.3 | 130.3   | 127.0 |
| OF+CO2→FOO+CO                                   | 48.8 <sup>a</sup>  | 51.2  | 51.2    | 55.0  | 54.7  | 54.8    | 62.4  |
| OF+CO→FOO+C                                     | 178.1 <sup>a</sup> | 181.1 | 181.1   | 180.1 | 178.6 | 178.6   | 175.5 |
| OF+trans-HO3→FOO+HO2                            | -23.9 <sup>a</sup> | -18.6 | -18.5   | -17.7 | -20.5 | -20.4   | -20.7 |
| OF+O3→FOO+O2                                    | -55.0 <sup>a</sup> | -43.2 | -43.1   | -42.6 | -61.8 | -61.7   | -63.0 |

... continued on next page ...

Table S30: ... continued from previous page ...

| Species                                                                                                         | Ref.                | OM2    | OM2-D3T | ODM2   | OM3    | OM3-D3T | ODM3   |
|-----------------------------------------------------------------------------------------------------------------|---------------------|--------|---------|--------|--------|---------|--------|
| OF+H2O2→FOO+H2O                                                                                                 | -45.5 <sup>a</sup>  | -32.4  | -32.3   | -34.0  | -35.8  | -35.8   | -35.9  |
| OF+H2O→FOO+H2                                                                                                   | 41.8 <sup>a</sup>   | 46.5   | 46.4    | 55.2   | 46.4   | 46.3    | 49.5   |
| OF+C2H3F→FOF+C2H3                                                                                               | 87.1 <sup>a</sup>   | 75.2   | 75.4    | 75.7   | 77.3   | 77.6    | 80.0   |
| OF+HCCF→FOF+C2H                                                                                                 | 91.6 <sup>a</sup>   | 87.4   | 87.5    | 87.4   | 91.6   | 91.6    | 94.3   |
| OF+CF2→FOF+CF                                                                                                   | 85.4 <sup>a</sup>   | 84.0   | 84.0    | 85.5   | 87.1   | 87.1    | 85.9   |
| OF+CF→FOF+F                                                                                                     | 92.0 <sup>a</sup>   | 94.3   | 94.3    | 90.7   | 97.7   | 97.6    | 93.1   |
| OF+F2→FOF+F                                                                                                     | -1.7 <sup>a</sup>   | -7.9   | -7.9    | -6.7   | -6.4   | -6.6    | -7.6   |
| OF+O2→FOO+O                                                                                                     | 39.2 <sup>a</sup>   | 48.6   | 48.6    | 47.5   | 51.9   | 51.8    | 49.0   |
| The OM <sub>x</sub> and OM <sub>x</sub> -D3T energies are corrected by excluding ZPVE and thermal contributions |                     |        |         |        |        |         |        |
| H+CH3F→HF+CH3                                                                                                   | -26.6 <sup>a</sup>  | -20.1  | -19.9   | -30.3  | -25.0  | -24.7   | -26.4  |
| H+FOOF→HF+FOO                                                                                                   | -124.0 <sup>a</sup> | -107.7 | -107.5  | -115.2 | -121.5 | -121.3  | -121.0 |
| H+FOOF→OH+F2                                                                                                    | -48.6 <sup>a</sup>  | -56.1  | -56.0   | -58.2  | -61.9  | -61.6   | -62.0  |
| H+FOO→OH+OF                                                                                                     | -25.6 <sup>a</sup>  | -41.2  | -41.1   | -42.7  | -39.4  | -39.2   | -40.5  |
| H+FOO→HF+O2                                                                                                     | -127.7 <sup>a</sup> | -136.8 | -136.6  | -143.9 | -144.1 | -143.9  | -141.4 |
| H+FOF→HF+OF                                                                                                     | -100.9 <sup>a</sup> | -92.7  | -92.6   | -99.7  | -99.1  | -98.9   | -99.5  |
| H+FOF→OH+F2                                                                                                     | -52.5 <sup>a</sup>  | -52.7  | -52.6   | -56.8  | -56.0  | -55.9   | -56.9  |
| H+HOF→OH+HF                                                                                                     | -90.2 <sup>a</sup>  | -92.5  | -92.4   | -101.6 | -98.0  | -97.9   | -99.8  |
| H+OF→HF+O                                                                                                       | -88.6 <sup>a</sup>  | -87.8  | -87.8   | -96.5  | -91.8  | -91.7   | -92.4  |
| H+OF→OH+F                                                                                                       | -54.1 <sup>a</sup>  | -60.6  | -60.6   | -63.5  | -62.6  | -62.5   | -64.5  |
| H+O2N→OH+NO                                                                                                     | -32.1 <sup>a</sup>  | -31.0  | -30.8   | -30.1  | -35.9  | -35.6   | -34.8  |
| H+O2N→NH+O2                                                                                                     | 24.0 <sup>a</sup>   | 27.8   | 28.0    | 27.3   | 20.9   | 21.2    | 23.2   |
| H+N2O→OH+N2                                                                                                     | -64.8 <sup>a</sup>  | -71.7  | -71.5   | -70.4  | -73.9  | -73.6   | -69.9  |
| H+N2O→NH+NO                                                                                                     | 35.0 <sup>a</sup>   | 31.0   | 31.3    | 29.6   | 5.8    | 6.1     | 13.0   |
| H+trans-HONO→OH+HNO                                                                                             | -0.5 <sup>a</sup>   | -11.7  | -11.5   | -15.5  | -15.9  | -15.6   | -15.4  |
| H+trans-HONO→NH+HO2                                                                                             | 54.0 <sup>a</sup>   | 45.9   | 46.2    | 43.4   | 49.9   | 50.3    | 49.5   |
| H+HNCO→NH+HCO                                                                                                   | 72.2 <sup>a</sup>   | 38.5   | 38.7    | 39.5   | 37.1   | 37.5    | 42.3   |
| H+HNCO→CH+HNO                                                                                                   | 144.6 <sup>a</sup>  | 112.4  | 112.6   | 110.8  | 108.2  | 108.6   | 112.9  |
| H+HNCO→OH+HCN                                                                                                   | 14.1 <sup>a</sup>   | -18.9  | -18.6   | -14.8  | -9.8   | -9.4    | -5.8   |
| H+HNO→NH+OH                                                                                                     | 15.6 <sup>a</sup>   | 17.7   | 17.8    | 15.1   | 21.4   | 21.7    | 15.9   |
| H+NO→NH+O                                                                                                       | 69.7 <sup>a</sup>   | 66.5   | 66.5    | 62.2   | 69.7   | 69.7    | 66.5   |
| H+NO→OH+N                                                                                                       | 45.5 <sup>a</sup>   | 40.0   | 40.0    | 39.3   | 47.8   | 47.9    | 47.2   |
| H+oxirene→OH+C2H2                                                                                               | -56.7 <sup>a</sup>  | -60.6  | -60.4   | -62.8  | -60.7  | -60.3   | -64.3  |
| H+oxirane→OH+C2H4                                                                                               | -19.8 <sup>a</sup>  | -22.2  | -22.0   | -26.3  | -26.4  | -26.1   | -31.8  |
| H+methanol→OH+CH4                                                                                               | -14.1 <sup>a</sup>  | -20.7  | -20.4   | -21.0  | -19.9  | -19.5   | -21.0  |
| H+trans-HCOH→CH+H2O                                                                                             | 5.3 <sup>a</sup>    | 20.4   | 20.6    | 16.3   | 16.4   | 16.7    | 10.1   |
| H+trans-HCOH→OH+CH2                                                                                             | 24.5 <sup>a</sup>   | 34.5   | 34.6    | 32.9   | 30.5   | 30.8    | 24.2   |
| H+formic acid→OH+trans-HCOH                                                                                     | 72.2 <sup>a</sup>   | 47.1   | 47.4    | 45.1   | 47.4   | 47.9    | 51.6   |
| H+formic acid→H2O+HCO                                                                                           | -10.5 <sup>a</sup>  | -24.0  | -23.7   | -25.0  | -28.8  | -28.2   | -24.8  |
| H+formic acid→CH+H2O2                                                                                           | 148.6 <sup>a</sup>  | 140.3  | 140.6   | 138.0  | 138.4  | 138.9   | 138.1  |
| H+ketene→OH+CH2C                                                                                                | 66.3 <sup>a</sup>   | 42.1   | 42.3    | 41.2   | 47.1   | 47.5    | 47.1   |
| H+ketene→CH+H2CO                                                                                                | 74.6 <sup>a</sup>   | 61.0   | 61.3    | 58.1   | 63.2   | 63.7    | 59.4   |
| H+glyoxal→OH+oxirene                                                                                            | 71.8 <sup>a</sup>   | 76.8   | 77.2    | 75.4   | 77.6   | 78.3    | 79.1   |
| H+glyoxal→CH+formic acid                                                                                        | 49.0 <sup>a</sup>   | 61.8   | 62.2    | 55.6   | 61.8   | 62.4    | 57.5   |
| H+acetaldehyde→CH+methanol                                                                                      | 80.1 <sup>a</sup>   | 83.5   | 84.0    | 78.2   | 83.6   | 84.3    | 80.6   |
| H+acetaldehyde→OH+C2H4                                                                                          | 6.6 <sup>a</sup>    | 7.9    | 8.2     | 6.5    | 10.5   | 11.1    | 9.4    |
| H+F2CO→OH+CF2                                                                                                   | 54.6 <sup>a</sup>   | 29.6   | 29.9    | 32.1   | 32.3   | 32.7    | 40.7   |
| H+F2CO→CH+FOF                                                                                                   | 242.6 <sup>a</sup>  | 226.9  | 227.1   | 225.8  | 232.5  | 232.9   | 233.1  |
| H+HFCO→HF+HCO                                                                                                   | -17.3 <sup>a</sup>  | -31.1  | -30.9   | -39.0  | -35.4  | -35.1   | -31.8  |
| H+H2CO→OH+CH2 ( <sup>3</sup> B <sub>1</sub> )                                                                   | 76.7 <sup>a</sup>   | 76.1   | 76.3    | 71.9   | 74.5   | 74.9    | 72.4   |
| H+H2CO→CH+H2O                                                                                                   | 57.5 <sup>a</sup>   | 62.0   | 62.2    | 55.3   | 60.3   | 60.7    | 58.2   |
| H+HCO→OH+CH                                                                                                     | 88.0 <sup>a</sup>   | 91.6   | 91.7    | 86.3   | 92.6   | 92.8    | 86.5   |
| H+CO2→OH+CO                                                                                                     | 23.2 <sup>a</sup>   | 11.0   | 11.1    | 12.4   | 16.5   | 16.7    | 21.9   |
| H+CO2→CH+O2                                                                                                     | 185.1 <sup>a</sup>  | 167.9  | 168.0   | 165.8  | 166.4  | 166.7   | 168.9  |
| H+CO→CH+O                                                                                                       | 175.5 <sup>a</sup>  | 164.6  | 164.6   | 158.3  | 162.8  | 162.9   | 155.5  |
| H+CO→OH+C                                                                                                       | 152.5 <sup>a</sup>  | 140.7  | 140.8   | 137.4  | 140.1  | 140.3   | 135.0  |
| H+HCN→NH+CH                                                                                                     | 146.1 <sup>a</sup>  | 148.9  | 149.1   | 140.7  | 139.5  | 139.7   | 134.6  |
| H+CN→CH+N                                                                                                       | 97.1 <sup>a</sup>   | 88.7   | 88.8    | 86.4   | 94.1   | 94.2    | 93.8   |
| H+CN→NH+C                                                                                                       | 98.2 <sup>a</sup>   | 91.4   | 91.5    | 88.5   | 93.3   | 93.5    | 92.6   |
| H+trans-HO3→OH+HO2                                                                                              | -49.4 <sup>a</sup>  | -59.6  | -59.4   | -60.4  | -59.9  | -59.6   | -61.2  |
| H+O3→OH+O2                                                                                                      | -80.6 <sup>a</sup>  | -84.3  | -84.2   | -85.2  | -101.3 | -101.0  | -103.6 |
| H+H2O2→OH+H2O                                                                                                   | -71.1 <sup>a</sup>  | -72.8  | -72.6   | -76.6  | -74.6  | -74.4   | -76.4  |
| H+HO2→2OH                                                                                                       | -38.9 <sup>a</sup>  | -39.9  | -39.8   | -43.9  | -44.4  | -44.2   | -49.0  |
| H+H2O→OH+H2                                                                                                     | 16.3 <sup>a</sup>   | 8.6    | 8.7     | 12.5   | 10.8   | 10.9    | 8.9    |
| H+trans-H2N2→NH+NH2                                                                                             | 30.9 <sup>a</sup>   | 38.0   | 38.2    | 29.7   | 37.2   | 37.6    | 25.7   |
| H+propyne→CH+C2H4                                                                                               | 57.3 <sup>a</sup>   | 54.3   | 54.6    | 50.4   | 53.8   | 54.3    | 50.2   |

... continued on next page ...

Table S30: ... continued from previous page ...

| Species                                      | Ref.                | OM2    | OM2-D3T | ODM2   | OM3    | OM3-D3T | ODM3   |
|----------------------------------------------|---------------------|--------|---------|--------|--------|---------|--------|
| H+propene→CH+C2H6                            | 64.3 <sup>a</sup>   | 61.3   | 61.8    | 57.2   | 59.4   | 60.2    | 56.7   |
| H+C2H3F→HF+C2H3                              | -13.8 <sup>a</sup>  | -15.7  | -15.4   | -24.0  | -20.0  | -19.6   | -19.5  |
| H+C2H3F→CH+CH3F                              | 66.7 <sup>a</sup>   | 58.7   | 59.1    | 55.8   | 60.3   | 60.9    | 56.6   |
| H+C2H4→CH+CH4                                | 59.5 <sup>a</sup>   | 55.0   | 55.4    | 50.7   | 53.1   | 53.8    | 50.1   |
| H+C2H3→CH+CH3                                | 54.0 <sup>a</sup>   | 54.3   | 54.6    | 49.4   | 55.3   | 55.8    | 49.8   |
| H+C2F2→CH+CF2                                | 43.1 <sup>a</sup>   | 25.4   | 25.6    | 24.3   | 30.7   | 31.0    | 35.3   |
| H+HCCF→HF+C2H                                | -9.3 <sup>a</sup>   | -3.8   | -3.7    | -12.2  | -17.4  | -17.2   | -5.2   |
| H+C2H2→CH+CH2                                | 130.6 <sup>a</sup>  | 127.2  | 127.4   | 120.9  | 122.8  | 123.2   | 118.6  |
| H+CF2→CH+F2                                  | 135.5 <sup>a</sup>  | 144.6  | 144.7   | 136.9  | 144.2  | 144.3   | 135.5  |
| H+CF2→HF+CF                                  | -15.6 <sup>a</sup>  | -8.6   | -8.5    | -14.2  | -11.9  | -11.7   | -13.6  |
| H+CH2( <sup>3</sup> B <sub>1</sub> )→CH+H2   | -3.0 <sup>a</sup>   | -5.4   | -5.4    | -4.1   | -3.4   | -3.2    | -5.2   |
| H+CF→HF+C                                    | -8.9 <sup>a</sup>   | 1.5    | 1.5     | -9.0   | -1.5   | -1.4    | -6.4   |
| H+CF→CH+F                                    | 48.5 <sup>a</sup>   | 52.6   | 52.6    | 44.8   | 50.4   | 50.4    | 42.0   |
| H+F2→HF+F                                    | -102.6 <sup>a</sup> | -100.7 | -100.6  | -106.4 | -105.6 | -105.6  | -107.1 |
| H+O2→OH+O                                    | 13.6 <sup>a</sup>   | 7.7    | 7.7     | 4.8    | 12.9   | 12.9    | 8.5    |
| H+N2→NH+N                                    | 145.4 <sup>a</sup>  | 142.7  | 142.8   | 139.3  | 127.5  | 127.6   | 130.1  |
| C+CH3F→CF+CH3                                | -17.6 <sup>a</sup>  | -21.5  | -21.4   | -21.4  | -23.5  | -23.3   | -20.0  |
| C+FOOF→CF+FOO                                | -115.1 <sup>a</sup> | -109.1 | -109.0  | -106.3 | -120.0 | -119.9  | -114.6 |
| C+FOOF→CO+FOF                                | -201.1 <sup>a</sup> | -196.9 | -196.8  | -195.7 | -202.0 | -201.9  | -197.0 |
| C+FOO→CO+OF                                  | -178.1 <sup>a</sup> | -182.0 | -181.9  | -180.1 | -179.6 | -179.5  | -175.5 |
| C+FOO→CF+O2                                  | -118.8 <sup>a</sup> | -138.2 | -138.2  | -135.0 | -142.6 | -142.5  | -135.0 |
| C+FOF→CF+OF                                  | -92.0 <sup>a</sup>  | -94.2  | -94.2   | -90.7  | -97.6  | -97.6   | -93.1  |
| C+FOF→CO+F2                                  | -205.0 <sup>a</sup> | -193.4 | -193.4  | -194.3 | -196.2 | -196.2  | -191.9 |
| C+HOF→CO+HF                                  | -242.7 <sup>a</sup> | -233.2 | -233.2  | -239.1 | -238.1 | -238.2  | -234.8 |
| C+OF→CF+O                                    | -79.7 <sup>a</sup>  | -89.3  | -89.3   | -87.5  | -90.3  | -90.4   | -86.0  |
| C+OF→CO+F                                    | -206.7 <sup>a</sup> | -201.3 | -201.4  | -201.0 | -202.7 | -202.8  | -199.5 |
| C+O2N→CO+NO                                  | -184.6 <sup>a</sup> | -171.7 | -171.6  | -167.5 | -176.0 | -175.9  | -169.8 |
| C+O2N→CN+O2                                  | -74.3 <sup>a</sup>  | -63.6  | -63.5   | -61.1  | -72.4  | -72.3   | -69.4  |
| C+N2O→CO+N2                                  | -217.4 <sup>a</sup> | -212.4 | -212.3  | -207.8 | -214.0 | -213.9  | -205.0 |
| C+N2O→CN+NO                                  | -63.2 <sup>a</sup>  | -60.3  | -60.2   | -58.9  | -87.5  | -87.4   | -79.6  |
| C+trans-HONO→CO+HNO                          | -153.0 <sup>a</sup> | -152.4 | -152.3  | -153.0 | -156.1 | -155.9  | -150.5 |
| C+trans-HONO→CN+HO2                          | -44.2 <sup>a</sup>  | -45.4  | -45.3   | -45.1  | -43.4  | -43.3   | -43.1  |
| C+HNCO→CN+HCO                                | -26.0 <sup>a</sup>  | -52.9  | -52.7   | -48.9  | -56.2  | -56.0   | -50.3  |
| C+HNCO→CO+HCN                                | -138.4 <sup>a</sup> | -159.6 | -159.4  | -152.2 | -150.0 | -149.7  | -140.8 |
| C+HNO→CN+OH                                  | -82.7 <sup>a</sup>  | -73.7  | -73.6   | -73.4  | -71.9  | -71.8   | -76.7  |
| C+NO→CN+O                                    | -28.6 <sup>a</sup>  | -24.9  | -24.9   | -26.2  | -23.7  | -23.8   | -26.1  |
| C+NO→CO+N                                    | -107.0 <sup>a</sup> | -100.8 | -100.8  | -98.1  | -92.4  | -92.4   | -87.8  |
| C+oxirene→CO+C2H2                            | -209.2 <sup>a</sup> | -201.4 | -201.2  | -200.2 | -200.8 | -200.6  | -199.4 |
| C+oxirane→CO+C2H4                            | -172.3 <sup>a</sup> | -162.9 | -162.8  | -163.8 | -166.6 | -166.4  | -166.8 |
| C+methanol→CO+CH4                            | -166.7 <sup>a</sup> | -161.4 | -161.2  | -158.4 | -160.0 | -159.8  | -156.1 |
| C+trans-HCOH→CO+CH2                          | -128.0 <sup>a</sup> | -106.3 | -106.2  | -104.5 | -109.6 | -109.5  | -110.8 |
| C+formic acid→CO+trans-HCOH                  | -80.3 <sup>a</sup>  | -93.6  | -93.4   | -92.3  | -92.7  | -92.4   | -83.4  |
| C+ketene→CO+CH2C                             | -86.2 <sup>a</sup>  | -98.6  | -98.5   | -96.2  | -93.0  | -92.8   | -87.9  |
| C+glyoxal→CO+oxirene                         | -80.7 <sup>a</sup>  | -63.9  | -63.6   | -62.0  | -62.6  | -62.0   | -55.9  |
| C+acetaldehyde→CO+C2H4                       | -146.0 <sup>a</sup> | -132.9 | -132.6  | -130.9 | -129.6 | -129.2  | -125.6 |
| C+F2CO→CO+CF2                                | -97.9 <sup>a</sup>  | -111.1 | -111.0  | -105.4 | -107.8 | -107.6  | -94.3  |
| C+HFCO→CF+HCO                                | -8.4 <sup>a</sup>   | -32.6  | -32.4   | -30.1  | -33.9  | -33.7   | -25.4  |
| C+H2CO→CO+CH2( <sup>3</sup> B <sub>1</sub> ) | -75.8 <sup>a</sup>  | -64.7  | -64.5   | -65.5  | -65.6  | -65.4   | -62.7  |
| C+HCO→CO+CH                                  | -64.5 <sup>a</sup>  | -49.1  | -49.1   | -51.1  | -47.6  | -47.5   | -48.5  |
| C+CO2→CO+CO                                  | -129.3 <sup>a</sup> | -129.8 | -129.7  | -125.0 | -123.7 | -123.6  | -113.1 |
| C+HCN→CN+CH                                  | 47.9 <sup>a</sup>   | 57.6   | 57.6    | 52.2   | 46.2   | 46.2    | 42.1   |
| C+O3→CO+O2                                   | -233.1 <sup>a</sup> | -225.0 | -225.0  | -222.6 | -241.4 | -241.3  | -238.6 |
| C+H2O2→CO+H2O                                | -223.6 <sup>a</sup> | -213.5 | -213.4  | -214.1 | -214.8 | -214.7  | -211.4 |
| C+HO2→CO+OH                                  | -191.4 <sup>a</sup> | -180.6 | -180.6  | -181.3 | -184.5 | -184.5  | -184.0 |
| C+H2O→CO+H2                                  | -136.2 <sup>a</sup> | -132.1 | -132.1  | -124.9 | -129.3 | -129.4  | -126.1 |
| C+trans-H2N2→CN+NH2                          | -67.4 <sup>a</sup>  | -53.4  | -53.2   | -58.8  | -56.1  | -55.9   | -66.9  |
| C+C2H3F→CF+C2H3                              | -4.9 <sup>a</sup>   | -17.1  | -16.9   | -15.0  | -18.5  | -18.2   | -13.1  |
| C+HCCF→CF+C2H                                | -0.4 <sup>a</sup>   | -5.3   | -5.2    | -3.3   | -15.9  | -15.9   | 1.2    |
| C+CF2→2*CF                                   | -6.7 <sup>a</sup>   | -10.1  | -10.0   | -5.2   | -10.4  | -10.3   | -7.2   |
| C+F2→CF+F                                    | -93.7 <sup>a</sup>  | -102.1 | -102.2  | -97.4  | -104.1 | -104.2  | -100.7 |
| C+O2→CO+O                                    | -138.9 <sup>a</sup> | -133.0 | -133.1  | -132.6 | -127.3 | -127.3  | -126.6 |
| C+N2→CN+N                                    | 47.1 <sup>a</sup>   | 51.4   | 51.3    | 50.9   | 34.1   | 34.1    | 37.6   |
| N+FOOF→NO+FOF                                | -94.2 <sup>a</sup>  | -96.1  | -96.0   | -97.6  | -109.6 | -109.5  | -109.2 |
| N+FOO→NO+OF                                  | -71.1 <sup>a</sup>  | -81.2  | -81.1   | -82.0  | -87.2  | -87.1   | -87.7  |
| N+FOF→NO+F2                                  | -98.0 <sup>a</sup>  | -92.6  | -92.6   | -96.2  | -103.8 | -103.8  | -104.1 |

... continued on next page ...

Table S30: ... continued from previous page ...

| Species                                                                | Ref.                | OM2    | OM2-D3T | ODM2   | OM3    | OM3-D3T | ODM3   |
|------------------------------------------------------------------------|---------------------|--------|---------|--------|--------|---------|--------|
| N+HOF→NO+HF                                                            | -135.7 <sup>a</sup> | -132.4 | -132.4  | -141.0 | -145.8 | -145.7  | -147.0 |
| N+OF→NO+F                                                              | -99.7 <sup>a</sup>  | -100.6 | -100.6  | -102.9 | -110.3 | -110.4  | -111.7 |
| N+O <sub>2</sub> N→NO+NO                                               | -77.6 <sup>a</sup>  | -71.0  | -70.9   | -69.4  | -83.7  | -83.5   | -82.0  |
| N+O <sub>2</sub> N→N <sub>2</sub> +O <sub>2</sub>                      | -121.4 <sup>a</sup> | -114.9 | -114.8  | -112.0 | -106.6 | -106.4  | -106.9 |
| N+N <sub>2</sub> O→NO+N <sub>2</sub>                                   | -110.4 <sup>a</sup> | -111.7 | -111.5  | -109.7 | -121.7 | -121.5  | -117.1 |
| N+trans-HONO→NO+HNO                                                    | -46.0 <sup>a</sup>  | -51.6  | -51.5   | -54.9  | -63.7  | -63.5   | -62.7  |
| N+trans-HONO→N <sub>2</sub> +HO <sub>2</sub>                           | -91.4 <sup>a</sup>  | -96.8  | -96.6   | -95.9  | -77.6  | -77.4   | -80.6  |
| N+HNCO→N <sub>2</sub> +HCO                                             | -73.2 <sup>a</sup>  | -104.2 | -104.1  | -99.8  | -90.4  | -90.1   | -87.8  |
| N+HNCO→CN+HNO                                                          | 47.5 <sup>a</sup>   | 23.6   | 23.8    | 24.4   | 14.1   | 14.4    | 19.1   |
| N+HNCO→NO+HCN                                                          | -31.4 <sup>a</sup>  | -58.8  | -58.7   | -54.1  | -57.6  | -57.3   | -53.0  |
| N+HNO→N <sub>2</sub> +OH                                               | -129.8 <sup>a</sup> | -125.0 | -125.0  | -124.2 | -106.0 | -105.9  | -114.2 |
| N+NO→N <sub>2</sub> +O                                                 | -75.7 <sup>a</sup>  | -76.2  | -76.3   | -77.1  | -57.8  | -57.9   | -63.7  |
| N+oxirene→NO+C <sub>2</sub> H <sub>2</sub>                             | -102.2 <sup>a</sup> | -100.6 | -100.4  | -102.1 | -108.5 | -108.2  | -111.5 |
| N+oxirane→NO+C <sub>2</sub> H <sub>4</sub>                             | -65.3 <sup>a</sup>  | -62.2  | -62.0   | -65.6  | -74.2  | -73.9   | -79.0  |
| N+methanol→NO+CH <sub>4</sub>                                          | -59.7 <sup>a</sup>  | -60.6  | -60.4   | -60.3  | -67.7  | -67.3   | -68.2  |
| N+trans-HCOH→CN+H <sub>2</sub> O                                       | -91.8 <sup>a</sup>  | -68.3  | -68.2   | -70.1  | -77.7  | -77.6   | -83.7  |
| N+trans-HCOH→NO+CH <sub>2</sub>                                        | -21.0 <sup>a</sup>  | -5.5   | -5.4    | -6.4   | -17.2  | -17.1   | -23.0  |
| N+formic acid→NO+trans-HCOH                                            | 26.7 <sup>a</sup>   | 7.2    | 7.4     | 5.8    | -0.3   | 0.0     | 4.4    |
| N+formic acid→CN+H <sub>2</sub> O <sub>2</sub>                         | 51.5 <sup>a</sup>   | 51.6   | 51.8    | 51.6   | 44.3   | 44.7    | 44.3   |
| N+ketene→NO+CH <sub>2</sub> C                                          | 20.8 <sup>a</sup>   | 2.1    | 2.3     | 1.9    | -0.6   | -0.4    | -0.1   |
| N+ketene→CN+H <sub>2</sub> CO                                          | -22.6 <sup>a</sup>  | -27.7  | -27.5   | -28.2  | -30.9  | -30.6   | -34.4  |
| N+glyoxal→NO+oxirene                                                   | 26.3 <sup>a</sup>   | 36.8   | 37.2    | 36.1   | 29.8   | 30.4    | 31.9   |
| N+glyoxal→CN+formic acid                                               | -48.1 <sup>a</sup>  | -26.9  | -26.6   | -30.8  | -32.3  | -31.8   | -36.3  |
| N+acetaldehyde→CN+methanol                                             | -17.0 <sup>a</sup>  | -5.2   | -4.8    | -8.1   | -10.5  | -9.9    | -13.2  |
| N+acetaldehyde→NO+C <sub>2</sub> H <sub>4</sub>                        | -39.0 <sup>a</sup>  | -32.1  | -31.8   | -32.8  | -37.2  | -36.8   | -37.8  |
| N+F <sub>2</sub> CO→NO+CF <sub>2</sub>                                 | 9.1 <sup>a</sup>    | -10.3  | -10.2   | -7.3   | -15.5  | -15.2   | -6.5   |
| N+F <sub>2</sub> CO→CN+FOF                                             | 145.5 <sup>a</sup>  | 138.2  | 138.3   | 139.4  | 138.4  | 138.7   | 139.3  |
| N+H <sub>2</sub> CO→NO+CH <sub>2</sub> ( <sup>3</sup> B <sub>1</sub> ) | 31.2 <sup>a</sup>   | 36.1   | 36.2    | 32.6   | 26.8   | 27.0    | 25.1   |
| N+H <sub>2</sub> CO→CN+H <sub>2</sub> O                                | -39.7 <sup>a</sup>  | -26.7  | -26.6   | -31.1  | -33.7  | -33.5   | -35.6  |
| N+HCO→NO+CH                                                            | 42.5 <sup>a</sup>   | 51.6   | 51.7    | 47.0   | 44.8   | 44.9    | 39.3   |
| N+CO <sub>2</sub> →NO+CO                                               | -22.3 <sup>a</sup>  | -29.0  | -28.9   | -26.9  | -31.3  | -31.1   | -25.3  |
| N+CO <sub>2</sub> →CN+O <sub>2</sub>                                   | 88.0 <sup>a</sup>   | 79.2   | 79.2    | 79.4   | 72.3   | 72.4    | 75.1   |
| N+CO→CN+O                                                              | 78.4 <sup>a</sup>   | 75.9   | 75.8    | 71.9   | 68.7   | 68.6    | 61.7   |
| N+CO→NO+C                                                              | 107.0 <sup>a</sup>  | 100.8  | 100.8   | 98.1   | 92.4   | 92.4    | 87.8   |
| N+HCN→N <sub>2</sub> +CH                                               | 0.7 <sup>a</sup>    | 6.2    | 6.3     | 1.4    | 12.0   | 12.1    | 4.5    |
| N+CN→N <sub>2</sub> +C                                                 | -47.1 <sup>a</sup>  | -51.4  | -51.3   | -50.9  | -34.1  | -34.1   | -37.6  |
| N+trans-HO <sub>3</sub> →NO+HO <sub>2</sub>                            | -95.0 <sup>a</sup>  | -99.5  | -99.4   | -99.7  | -107.6 | -107.5  | -108.4 |
| N+O <sub>3</sub> →NO+O <sub>2</sub>                                    | -126.1 <sup>a</sup> | -124.3 | -124.2  | -124.5 | -149.0 | -148.9  | -150.8 |
| N+H <sub>2</sub> O <sub>2</sub> →NO+H <sub>2</sub> O                   | -116.6 <sup>a</sup> | -112.7 | -112.6  | -116.0 | -122.4 | -122.2  | -123.6 |
| N+HO <sub>2</sub> →NO+OH                                               | -84.4 <sup>a</sup>  | -79.9  | -79.8   | -83.2  | -92.1  | -92.1   | -96.2  |
| N+H <sub>2</sub> O→NO+H <sub>2</sub>                                   | -29.3 <sup>a</sup>  | -31.4  | -31.4   | -26.8  | -37.0  | -37.0   | -38.3  |
| N+trans-H <sub>2</sub> N <sub>2</sub> →N <sub>2</sub> +NH <sub>2</sub> | -114.5 <sup>a</sup> | -104.7 | -104.6  | -109.6 | -90.3  | -90.0   | -104.5 |
| N+propyne→CN+C <sub>2</sub> H <sub>4</sub>                             | -39.8 <sup>a</sup>  | -34.4  | -34.2   | -36.0  | -40.2  | -40.0   | -43.6  |
| N+propene→CN+C <sub>2</sub> H <sub>6</sub>                             | -32.9 <sup>a</sup>  | -27.4  | -27.0   | -29.1  | -34.6  | -34.0   | -37.1  |
| N+C <sub>2</sub> H <sub>3</sub> F→CN+CH <sub>3</sub> F                 | -30.4 <sup>a</sup>  | -30.0  | -29.7   | -30.6  | -33.8  | -33.4   | -37.2  |
| N+C <sub>2</sub> H <sub>4</sub> →CN+CH <sub>4</sub>                    | -37.7 <sup>a</sup>  | -33.7  | -33.4   | -35.7  | -40.9  | -40.5   | -43.7  |
| N+C <sub>2</sub> H <sub>3</sub> →CN+CH <sub>3</sub>                    | -43.1 <sup>a</sup>  | -34.4  | -34.2   | -37.0  | -38.7  | -38.4   | -44.0  |
| N+C <sub>2</sub> F <sub>2</sub> →CN+CF <sub>2</sub>                    | -54.0 <sup>a</sup>  | -63.3  | -63.2   | -62.1  | -63.4  | -63.2   | -58.5  |
| N+C <sub>2</sub> H <sub>2</sub> →CN+CH <sub>2</sub>                    | 33.4 <sup>a</sup>   | 38.5   | 38.6    | 34.5   | 28.8   | 29.0    | 24.8   |
| N+CF <sub>2</sub> →CN+F <sub>2</sub>                                   | 38.4 <sup>a</sup>   | 55.9   | 55.9    | 50.5   | 50.1   | 50.1    | 41.7   |
| N+CH <sub>2</sub> ( <sup>3</sup> B <sub>1</sub> )→CN+H <sub>2</sub>    | -100.1 <sup>a</sup> | -94.1  | -94.2   | -90.5  | -97.4  | -97.5   | -99.0  |
| N+CF→CN+F                                                              | -48.6 <sup>a</sup>  | -36.1  | -36.2   | -41.6  | -43.7  | -43.8   | -51.8  |
| N+O <sub>2</sub> →NO+O                                                 | -31.9 <sup>a</sup>  | -32.3  | -32.3   | -34.5  | -34.9  | -34.9   | -38.7  |
| O+CH <sub>3</sub> F→OF+CH <sub>3</sub>                                 | 62.0 <sup>a</sup>   | 67.8   | 67.9    | 66.1   | 66.8   | 67.1    | 66.0   |
| O+FOOF→OF+FOO                                                          | -35.4 <sup>a</sup>  | -19.8  | -19.7   | -18.8  | -29.7  | -29.6   | -28.7  |
| O+FOOF→O <sub>2</sub> +FOF                                             | -62.2 <sup>a</sup>  | -63.8  | -63.7   | -63.1  | -74.7  | -74.5   | -70.5  |
| O+FOO→O <sub>2</sub> +OF                                               | -39.2 <sup>a</sup>  | -48.9  | -48.8   | -47.5  | -52.3  | -52.2   | -49.0  |
| O+FOF→OF+OF                                                            | -12.4 <sup>a</sup>  | -4.9   | -4.8    | -3.2   | -7.3   | -7.2    | -7.2   |
| O+FOF→O <sub>2</sub> +F <sub>2</sub>                                   | -66.1 <sup>a</sup>  | -60.4  | -60.3   | -61.7  | -68.9  | -68.8   | -65.4  |
| O+HOF→O <sub>2</sub> +HF                                               | -103.8 <sup>a</sup> | -100.1 | -100.1  | -106.5 | -110.9 | -110.8  | -108.3 |
| O+OF→O <sub>2</sub> +F                                                 | -67.8 <sup>a</sup>  | -68.3  | -68.3   | -68.4  | -75.4  | -75.5   | -72.9  |
| O+O <sub>2</sub> N→O <sub>2</sub> +NO                                  | -45.7 <sup>a</sup>  | -38.7  | -38.6   | -34.9  | -48.8  | -48.6   | -43.3  |
| O+trans-HONO→O <sub>2</sub> +HNO                                       | -14.1 <sup>a</sup>  | -19.4  | -19.2   | -20.4  | -28.8  | -28.5   | -23.9  |
| O+trans-HONO→NO+HO <sub>2</sub>                                        | -15.6 <sup>a</sup>  | -20.6  | -20.4   | -18.8  | -19.8  | -19.5   | -17.0  |
| O+HNCO→NO+HCO                                                          | 2.6 <sup>a</sup>    | -28.0  | -27.8   | -22.7  | -32.6  | -32.2   | -24.2  |

... continued on next page ...

Table S30: ... continued from previous page ...

| Species                                       | Ref.                | OM2    | OM2-D3T | ODM2   | OM3    | OM3-D3T | ODM3   |
|-----------------------------------------------|---------------------|--------|---------|--------|--------|---------|--------|
| O+HNCO→CO+HNO                                 | -30.9 <sup>a</sup>  | -52.2  | -52.0   | -47.5  | -54.6  | -54.3   | -42.6  |
| O+HNCO→O2+HCN                                 | 0.5 <sup>a</sup>    | -26.6  | -26.4   | -19.6  | -22.7  | -22.4   | -14.3  |
| O+HNO→NO+OH                                   | -54.1 <sup>a</sup>  | -48.8  | -48.7   | -47.1  | -48.2  | -48.1   | -50.6  |
| O+NO→O2+N                                     | 31.9 <sup>a</sup>   | 32.3   | 32.3    | 34.5   | 34.9   | 34.9    | 38.7   |
| O+oxirene→O2+C2H2                             | -70.3 <sup>a</sup>  | -68.3  | -68.1   | -67.6  | -73.6  | -73.2   | -72.8  |
| O+oxirane→O2+C2H4                             | -33.4 <sup>a</sup>  | -29.9  | -29.7   | -31.2  | -39.3  | -39.0   | -40.2  |
| O+methanol→O2+CH4                             | -27.7 <sup>a</sup>  | -28.4  | -28.1   | -25.8  | -32.8  | -32.4   | -29.5  |
| O+trans-HCOH→CO+H2O                           | -170.2 <sup>a</sup> | -144.2 | -144.0  | -142.0 | -146.4 | -146.2  | -145.4 |
| O+trans-HCOH→O2+CH2                           | 10.9 <sup>a</sup>   | 26.8   | 26.9    | 28.1   | 17.7   | 17.9    | 15.8   |
| O+formic acid→O2+trans-HCOH                   | 58.6 <sup>a</sup>   | 39.4   | 39.7    | 40.3   | 34.6   | 35.0    | 43.2   |
| O+formic acid→CO+H2O2                         | -26.9 <sup>a</sup>  | -24.3  | -24.0   | -20.3  | -24.4  | -23.9   | -17.4  |
| O+ketene→O2+CH2C                              | 52.7 <sup>a</sup>   | 34.4   | 34.6    | 36.4   | 34.3   | 34.5    | 38.6   |
| O+ketene→CO+H2CO                              | -100.9 <sup>a</sup> | -103.6 | -103.4  | -100.1 | -99.6  | -99.2   | -96.1  |
| O+glyoxal→O2+oxirene                          | 58.2 <sup>a</sup>   | 69.1   | 69.5    | 70.6   | 64.7   | 65.3    | 70.6   |
| O+glyoxal→CO+formic acid                      | -126.5 <sup>a</sup> | -102.8 | -102.4  | -102.7 | -101.0 | -100.4  | -98.0  |
| O+acetaldehyde→CO+methanol                    | -95.4 <sup>a</sup>  | -81.1  | -80.6   | -80.0  | -79.2  | -78.6   | -74.9  |
| O+acetaldehyde→O2+C2H4                        | -7.1 <sup>a</sup>   | 0.2    | 0.5     | 1.7    | -2.4   | -1.9    | 0.9    |
| O+F2CO→O2+CF2                                 | 41.0 <sup>a</sup>   | 21.9   | 22.1    | 27.2   | 19.4   | 19.7    | 32.2   |
| O+F2CO→CO+FOF                                 | 67.1 <sup>a</sup>   | 62.3   | 62.5    | 67.6   | 69.7   | 70.0    | 77.6   |
| O+HFCO→OF+HCO                                 | 71.2 <sup>a</sup>   | 56.7   | 56.9    | 57.4   | 56.4   | 56.6    | 60.5   |
| O+H2CO→O2+CH2 ( <sup>3</sup> B <sub>1</sub> ) | 63.1 <sup>a</sup>   | 68.4   | 68.5    | 67.1   | 61.6   | 61.9    | 63.9   |
| O+H2CO→CO+H2O                                 | -118.0 <sup>a</sup> | -102.6 | -102.4  | -103.0 | -102.4 | -102.2  | -97.3  |
| O+HCO→O2+CH                                   | 74.4 <sup>a</sup>   | 83.9   | 84.0    | 81.5   | 79.7   | 79.8    | 78.0   |
| O+CO2→O2+CO                                   | 9.6 <sup>a</sup>    | 3.3    | 3.4     | 7.6    | 3.6    | 3.8     | 13.4   |
| O+CO→O2+C                                     | 138.9 <sup>a</sup>  | 133.0  | 133.1   | 132.6  | 127.3  | 127.3   | 126.6  |
| O+HCN→NO+CH                                   | 76.5 <sup>a</sup>   | 82.4   | 82.6    | 78.5   | 69.8   | 70.0    | 68.2   |
| O+CN→CO+N                                     | -78.4 <sup>a</sup>  | -75.9  | -75.8   | -71.9  | -68.7  | -68.6   | -61.7  |
| O+CN→NO+C                                     | 28.6 <sup>a</sup>   | 24.9   | 24.9    | 26.2   | 23.7   | 23.8    | 26.1   |
| O+trans-HO3→O2+HO2                            | -63.1 <sup>a</sup>  | -67.3  | -67.1   | -65.2  | -72.7  | -72.5   | -69.6  |
| O+O3→O2+O2                                    | -94.2 <sup>a</sup>  | -92.0  | -91.9   | -90.1  | -114.1 | -114.0  | -112.0 |
| O+H2O2→O2+H2O                                 | -84.7 <sup>a</sup>  | -80.5  | -80.3   | -81.5  | -87.5  | -87.3   | -84.9  |
| O+HO2→O2+OH                                   | -52.5 <sup>a</sup>  | -47.6  | -47.5   | -48.7  | -57.2  | -57.1   | -57.5  |
| O+H2O→O2+H2                                   | 2.7 <sup>a</sup>    | 0.9    | 0.9     | 7.7    | -2.1   | -2.0    | 0.5    |
| O+trans-H2N2→NO+NH2                           | -38.8 <sup>a</sup>  | -28.5  | -28.3   | -32.5  | -32.5  | -32.1   | -40.8  |
| O+propyne→CO+C2H4                             | -118.2 <sup>a</sup> | -110.3 | -110.0  | -107.9 | -108.9 | -108.6  | -105.3 |
| O+propene→CO+C2H6                             | -111.2 <sup>a</sup> | -103.3 | -102.8  | -101.0 | -103.4 | -102.7  | -98.8  |
| O+C2H3F→OF+C2H3                               | 74.7 <sup>a</sup>   | 72.2   | 72.4    | 72.5   | 71.8   | 72.1    | 72.8   |
| O+C2H3F→CO+CH3F                               | -108.8 <sup>a</sup> | -105.9 | -105.5  | -102.5 | -102.5 | -102.0  | -98.9  |
| O+C2H4→CO+CH4                                 | -116.0 <sup>a</sup> | -109.6 | -109.3  | -107.5 | -109.6 | -109.1  | -105.4 |
| O+C2H3→CO+CH3                                 | -121.5 <sup>a</sup> | -110.3 | -110.0  | -108.9 | -107.5 | -107.1  | -105.7 |
| O+C2F2→CO+CF2                                 | -132.4 <sup>a</sup> | -139.2 | -139.1  | -133.9 | -132.1 | -131.9  | -120.2 |
| O+HCCF→OF+C2H                                 | 79.2 <sup>a</sup>   | 84.0   | 84.1    | 84.2   | 74.4   | 74.5    | 87.1   |
| O+C2H2→CO+CH2                                 | -45.0 <sup>a</sup>  | -37.4  | -37.2   | -37.4  | -39.9  | -39.7   | -36.9  |
| O+CF2→CO+F2                                   | -40.0 <sup>a</sup>  | -20.0  | -19.9   | -21.3  | -18.6  | -18.5   | -20.0  |
| O+CF2→OF+CF                                   | 73.0 <sup>a</sup>   | 79.2   | 79.3    | 82.3   | 79.9   | 80.0    | 78.8   |
| O+CH2 ( <sup>3</sup> B <sub>1</sub> )→CO+H2   | -178.5 <sup>a</sup> | -170.0 | -170.0  | -162.4 | -166.2 | -166.1  | -160.7 |
| O+CF→OF+C                                     | 79.7 <sup>a</sup>   | 89.3   | 89.3    | 87.5   | 90.3   | 90.4    | 86.0   |
| O+CF→CO+F                                     | -127.0 <sup>a</sup> | -112.0 | -112.1  | -113.5 | -112.4 | -112.4  | -113.5 |
| O+F2→OF+F                                     | -14.0 <sup>a</sup>  | -12.8  | -12.8   | -9.9   | -13.8  | -13.9   | -14.7  |
| O+N2→NO+N                                     | 75.7 <sup>a</sup>   | 76.2   | 76.3    | 77.1   | 57.8   | 57.9    | 63.7   |
| F+CH3F→F2+CH3                                 | 76.0 <sup>a</sup>   | 80.6   | 80.7    | 76.0   | 80.7   | 80.9    | 80.7   |
| F+FOOF→F2+FOO                                 | -21.4 <sup>a</sup>  | -7.0   | -6.9    | -8.9   | -15.9  | -15.7   | -13.9  |
| F+FOOF→OF+FOF                                 | 5.5 <sup>a</sup>    | 4.4    | 4.6     | 5.3    | 0.7    | 0.9     | 2.5    |
| F+FOO→OF+OF                                   | 28.6 <sup>a</sup>   | 19.4   | 19.5    | 20.9   | 23.1   | 23.3    | 24.0   |
| F+FOO→F2+O2                                   | -25.1 <sup>a</sup>  | -36.1  | -36.0   | -37.6  | -38.5  | -38.3   | -34.3  |
| F+FOF→F2+OF                                   | 1.7 <sup>a</sup>    | 7.9    | 8.0     | 6.7    | 6.5    | 6.6     | 7.6    |
| F+HOF→OF+HF                                   | -36.1 <sup>a</sup>  | -31.9  | -31.8   | -38.1  | -35.4  | -35.3   | -35.3  |
| F+OF→F2+O                                     | 14.0 <sup>a</sup>   | 12.8   | 12.8    | 9.9    | 13.8   | 13.9    | 14.7   |
| F+O2N→OF+NO                                   | 22.1 <sup>a</sup>   | 29.6   | 29.7    | 33.5   | 26.6   | 26.9    | 29.7   |
| F+N2O→OF+N2                                   | -10.7 <sup>a</sup>  | -11.1  | -10.9   | -6.9   | -11.4  | -11.1   | -5.5   |
| F+trans-HONO→OF+HNO                           | 53.7 <sup>a</sup>   | 48.9   | 49.1    | 48.0   | 46.6   | 46.9    | 49.0   |
| F+HNCO→CF+HNO                                 | 96.1 <sup>a</sup>   | 59.8   | 60.0    | 66.0   | 57.8   | 58.2    | 70.9   |
| F+HNCO→OF+HCN                                 | 68.2 <sup>a</sup>   | 41.7   | 41.9    | 48.7   | 52.7   | 53.1    | 58.7   |
| F+NO→OF+N                                     | 99.7 <sup>a</sup>   | 100.6  | 100.6   | 102.9  | 110.3  | 110.4   | 111.7  |
| F+oxirene→OF+C2H2                             | -2.5 <sup>a</sup>   | -0.1   | 0.2     | 0.8    | 1.9    | 2.2     | 0.1    |

... continued on next page ...

Table S30: ... continued from previous page ...

| Species                                       | Ref.               | OM2   | OM2-D3T | ODM2  | OM3   | OM3-D3T | ODM3  |
|-----------------------------------------------|--------------------|-------|---------|-------|-------|---------|-------|
| F+oxirane→OF+C2H4                             | 34.4 <sup>a</sup>  | 38.4  | 38.6    | 37.2  | 36.1  | 36.5    | 32.7  |
| F+methanol→OF+CH4                             | 40.0 <sup>a</sup>  | 39.9  | 40.2    | 42.5  | 42.7  | 43.1    | 43.4  |
| F+trans-HCOH→CF+H2O                           | -43.2 <sup>a</sup> | -32.2 | -32.0   | -28.5 | -34.1 | -33.8   | -31.9 |
| F+trans-HCOH→OF+CH2                           | 78.7 <sup>a</sup>  | 95.0  | 95.2    | 96.4  | 93.1  | 93.3    | 88.7  |
| F+formic acid→OF+trans-HCOH                   | 126.3 <sup>a</sup> | 107.7 | 108.0   | 108.6 | 110.0 | 110.4   | 116.1 |
| F+formic acid→CF+H2O2                         | 100.1 <sup>a</sup> | 87.7  | 88.1    | 93.2  | 88.0  | 88.5    | 96.1  |
| F+ketene→OF+CH2C                              | 120.5 <sup>a</sup> | 102.7 | 102.9   | 104.7 | 109.7 | 110.0   | 111.6 |
| F+ketene→CF+H2CO                              | 26.1 <sup>a</sup>  | 8.4   | 8.7     | 13.4  | 12.8  | 13.3    | 17.4  |
| F+glyoxal→OF+oxirene                          | 126.0 <sup>a</sup> | 137.4 | 137.8   | 139.0 | 140.1 | 140.8   | 143.6 |
| F+glyoxal→CF+formic acid                      | 0.5 <sup>a</sup>   | 9.2   | 9.6     | 10.8  | 11.4  | 12.0    | 15.5  |
| F+acetaldehyde→CF+methanol                    | 31.6 <sup>a</sup>  | 31.0  | 31.4    | 33.5  | 33.2  | 33.9    | 38.6  |
| F+acetaldehyde→OF+C2H4                        | 60.7 <sup>a</sup>  | 68.4  | 68.8    | 70.1  | 73.1  | 73.6    | 73.9  |
| F+F2CO→OF+CF2                                 | 108.8 <sup>a</sup> | 90.2  | 90.4    | 95.6  | 94.9  | 95.2    | 105.2 |
| F+F2CO→CF+FOF                                 | 194.1 <sup>a</sup> | 174.3 | 174.6   | 181.1 | 182.1 | 182.5   | 191.1 |
| F+HF2CO→F2+HCO                                | 85.3 <sup>a</sup>  | 69.6  | 69.7    | 67.3  | 70.2  | 70.5    | 75.3  |
| F+H2CO→OF+CH2 ( <sup>3</sup> B <sub>1</sub> ) | 130.8 <sup>a</sup> | 136.7 | 136.8   | 135.5 | 137.1 | 137.4   | 136.8 |
| F+H2CO→CF+H2O                                 | 9.0 <sup>a</sup>   | 9.5   | 9.7     | 10.5  | 9.9   | 10.3    | 16.2  |
| F+HCO→OF+CH                                   | 142.1 <sup>a</sup> | 152.2 | 152.3   | 149.9 | 155.1 | 155.3   | 151.0 |
| F+CO2→OF+CO                                   | 77.3 <sup>a</sup>  | 71.6  | 71.7    | 75.9  | 79.0  | 79.3    | 86.4  |
| F+CO2→CF+O2                                   | 136.6 <sup>a</sup> | 115.3 | 115.4   | 121.0 | 116.0 | 116.2   | 127.0 |
| F+CO→CF+O                                     | 127.0 <sup>a</sup> | 112.0 | 112.1   | 113.5 | 112.4 | 112.4   | 113.5 |
| F+CO→OF+C                                     | 206.7 <sup>a</sup> | 201.3 | 201.4   | 201.0 | 202.7 | 202.8   | 199.5 |
| F+CN→CF+N                                     | 48.6 <sup>a</sup>  | 36.1  | 36.2    | 41.6  | 43.7  | 43.8    | 51.8  |
| F+trans-HO3→OF+HO2                            | 4.7 <sup>a</sup>   | 1.0   | 1.2     | 3.1   | 2.7   | 2.9     | 3.3   |
| F+O3→OF+O2                                    | -26.5 <sup>a</sup> | -23.7 | -23.6   | -21.7 | -38.7 | -38.5   | -39.1 |
| F+H2O2→OF+H2O                                 | -17.0 <sup>a</sup> | -12.2 | -12.0   | -13.1 | -12.1 | -11.8   | -11.9 |
| F+H2O→OF+H2                                   | 70.4 <sup>a</sup>  | 69.2  | 69.2    | 76.1  | 73.4  | 73.4    | 73.4  |
| F+propyne→CF+C2H4                             | 8.8 <sup>a</sup>   | 1.7   | 2.0     | 5.6   | 3.4   | 3.8     | 8.2   |
| F+propene→CF+C2H6                             | 15.8 <sup>a</sup>  | 8.7   | 9.2     | 12.5  | 9.0   | 9.8     | 14.8  |
| F+C2H3F→F2+C2H3                               | 88.8 <sup>a</sup>  | 85.0  | 85.2    | 82.4  | 85.6  | 86.0    | 87.5  |
| F+C2H3F→CF+CH3F                               | 18.2 <sup>a</sup>  | 6.1   | 6.5     | 11.0  | 9.9   | 10.5    | 14.6  |
| F+C2H4→CF+CH4                                 | 11.0 <sup>a</sup>  | 2.4   | 2.8     | 6.0   | 2.7   | 3.3     | 8.1   |
| F+C2H3→CF+CH3                                 | 5.5 <sup>a</sup>   | 1.7   | 2.0     | 4.6   | 4.9   | 5.4     | 7.8   |
| F+C2F2→CF+CF2                                 | -5.4 <sup>a</sup>  | -27.2 | -27.0   | -20.4 | -19.7 | -19.4   | -6.6  |
| F+HCCF→F2+C2H                                 | 93.3 <sup>a</sup>  | 96.9  | 97.0    | 94.1  | 88.2  | 88.4    | 101.8 |
| F+C2H2→CF+CH2                                 | 82.1 <sup>a</sup>  | 74.6  | 74.8    | 76.1  | 72.4  | 72.8    | 76.6  |
| F+CF2→F2+CF                                   | 87.0 <sup>a</sup>  | 92.0  | 92.1    | 92.2  | 93.8  | 93.9    | 93.5  |
| F+CH2 ( <sup>3</sup> B <sub>1</sub> )→CF+H2   | -51.5 <sup>a</sup> | -58.0 | -57.9   | -48.9 | -53.8 | -53.7   | -47.2 |
| F+CF→F2+C                                     | 93.7 <sup>a</sup>  | 102.1 | 102.2   | 97.4  | 104.1 | 104.2   | 100.7 |
| F+O2→OF+O                                     | 67.8 <sup>a</sup>  | 68.3  | 68.3    | 68.4  | 75.4  | 75.5    | 72.9  |
| OH+CH3F→HOF+CH3                               | 63.6 <sup>a</sup>  | 72.4  | 72.5    | 71.3  | 73.0  | 73.2    | 73.4  |
| OH+FOOF→HOF+FOO                               | -33.8 <sup>a</sup> | -15.2 | -15.1   | -13.6 | -23.5 | -23.4   | -21.2 |
| OH+FOOF→HO2+FOF                               | -9.7 <sup>a</sup>  | -16.2 | -16.2   | -14.4 | -17.5 | -17.4   | -13.0 |
| OH+FOO→HO2+OF                                 | 13.3 <sup>a</sup>  | -1.3  | -1.3    | 1.2   | 4.9   | 5.0     | 8.5   |
| OH+FOO→HOF+O2                                 | -37.5 <sup>a</sup> | -44.3 | -44.3   | -42.3 | -46.1 | -46.0   | -41.6 |
| OH+FOF→HOF+OF                                 | -10.7 <sup>a</sup> | -0.3  | -0.3    | 2.0   | -1.1  | -1.1    | 0.3   |
| OH+FOF→HO2+F2                                 | -13.6 <sup>a</sup> | -12.8 | -12.8   | -13.0 | -11.7 | -11.7   | -7.9  |
| OH+HOF→HO2+HF                                 | -51.3 <sup>a</sup> | -52.6 | -52.6   | -57.8 | -53.6 | -53.7   | -50.8 |
| OH+OF→HOF+O                                   | 1.6 <sup>a</sup>   | 4.6   | 4.6     | 5.2   | 6.2   | 6.1     | 7.4   |
| OH+OF→HO2+F                                   | -15.2 <sup>a</sup> | -20.7 | -20.8   | -19.7 | -18.2 | -18.3   | -15.4 |
| OH+O2N→HO2+NO                                 | 6.8 <sup>a</sup>   | 8.9   | 9.0     | 13.8  | 8.4   | 8.6     | 14.2  |
| OH+O2N→HNO+O2                                 | 8.4 <sup>a</sup>   | 10.1  | 10.1    | 12.2  | -0.6  | -0.5    | 7.3   |
| OH+N2O→HO2+N2                                 | -26.0 <sup>a</sup> | -31.8 | -31.7   | -26.6 | -29.6 | -29.4   | -20.9 |
| OH+N2O→HNO+NO                                 | 19.4 <sup>a</sup>  | 13.3  | 13.4    | 14.5  | -15.6 | -15.5   | -2.9  |
| OH+trans-HONO→HO2+HNO                         | 38.4 <sup>a</sup>  | 28.2  | 28.3    | 28.3  | 28.4  | 28.6    | 33.6  |
| OH+HNCO→HCO+HNO                               | 56.6 <sup>a</sup>  | 20.8  | 20.9    | 24.5  | 15.6  | 15.8    | 26.4  |
| OH+HNCO→HO2+HCN                               | 53.0 <sup>a</sup>  | 21.0  | 21.2    | 29.0  | 34.5  | 34.7    | 43.2  |
| OH+NO→HNO+O                                   | 54.1 <sup>a</sup>  | 48.8  | 48.7    | 47.1  | 48.2  | 48.1    | 50.6  |
| OH+NO→HO2+N                                   | 84.4 <sup>a</sup>  | 79.9  | 79.8    | 83.2  | 92.1  | 92.1    | 96.2  |
| OH+oxirene→HO2+C2H2                           | -17.8 <sup>a</sup> | -20.7 | -20.6   | -18.9 | -16.3 | -16.1   | -15.3 |
| OH+oxirane→HO2+C2H4                           | 19.1 <sup>a</sup>  | 17.7  | 17.8    | 17.5  | 17.9  | 18.1    | 17.3  |
| OH+methanol→HO2+CH4                           | 24.8 <sup>a</sup>  | 19.2  | 19.4    | 22.9  | 24.5  | 24.7    | 28.0  |
| OH+trans-HCOH→HCO+H2O                         | -82.7 <sup>a</sup> | -71.2 | -71.1   | -70.1 | -76.2 | -76.1   | -76.4 |
| OH+trans-HCOH→HO2+CH2                         | 63.4 <sup>a</sup>  | 74.4  | 74.4    | 76.8  | 74.9  | 75.0    | 73.3  |
| OH+formic acid→HO2+trans-HCO                  | 111.1 <sup>a</sup> | 87.0  | 87.2    | 88.9  | 91.8  | 92.1    | 100.7 |

... continued on next page ...



Table S30: ... continued from previous page ...

| Species                                         | Ref.               | OM2   | OM2-D3T | ODM2  | OM3   | OM3-D3T | ODM3  |
|-------------------------------------------------|--------------------|-------|---------|-------|-------|---------|-------|
| OH+formic acid→HCO+H2O2                         | 60.6 <sup>a</sup>  | 48.7  | 48.9    | 51.7  | 45.8  | 46.2    | 51.6  |
| OH+ketene→HO2+CH2C                              | 105.2 <sup>a</sup> | 82.0  | 82.1    | 85.0  | 91.5  | 91.6    | 96.1  |
| OH+ketene→HCO+H2CO                              | -13.4 <sup>a</sup> | -30.6 | -30.4   | -28.2 | -29.4 | -29.1   | -27.1 |
| OH+glyoxal→HO2+oxirene                          | 110.7 <sup>a</sup> | 116.7 | 117.0   | 119.3 | 121.9 | 122.4   | 128.1 |
| OH+glyoxal→HCO+formic acid                      | -39.0 <sup>a</sup> | -29.8 | -29.5   | -30.7 | -30.8 | -30.3   | -29.0 |
| OH+acetaldehyde→HCO+methanol                    | -7.8 <sup>a</sup>  | -8.1  | -7.7    | -8.1  | -9.0  | -8.5    | -5.9  |
| OH+acetaldehyde→HO2+C2H4                        | 45.4 <sup>a</sup>  | 47.8  | 48.0    | 50.4  | 54.9  | 55.2    | 58.4  |
| OH+F2CO→HO2+CF2                                 | 93.5 <sup>a</sup>  | 69.5  | 69.7    | 75.9  | 76.7  | 76.9    | 89.7  |
| OH+F2CO→HCO+FOF                                 | 154.6 <sup>a</sup> | 135.3 | 135.4   | 139.5 | 139.9 | 140.1   | 146.6 |
| OH+HFCO→HOF+HCO                                 | 72.9 <sup>a</sup>  | 61.4  | 61.5    | 62.6  | 62.6  | 62.8    | 68.0  |
| OH+H2CO→HO2+CH2 ( <sup>3</sup> B <sub>1</sub> ) | 115.6 <sup>a</sup> | 116.0 | 116.1   | 115.8 | 118.9 | 119.0   | 121.4 |
| OH+H2CO→HCO+H2O                                 | -30.5 <sup>a</sup> | -29.6 | -29.5   | -31.0 | -32.2 | -32.1   | -28.3 |
| OH+HCO→HO2+CH                                   | 126.9 <sup>a</sup> | 131.5 | 131.5   | 130.2 | 136.9 | 137.0   | 135.5 |
| OH+CO2→HO2+CO                                   | 62.1 <sup>a</sup>  | 50.9  | 50.9    | 56.2  | 60.8  | 60.9    | 70.9  |
| OH+CO2→HCO+O2                                   | 97.1 <sup>a</sup>  | 76.3  | 76.3    | 79.5  | 73.8  | 73.9    | 82.4  |
| OH+CO→HCO+O                                     | 87.5 <sup>a</sup>  | 73.0  | 72.9    | 71.9  | 70.2  | 70.1    | 69.0  |
| OH+CO→HO2+C                                     | 191.4 <sup>a</sup> | 180.6 | 180.6   | 181.3 | 184.5 | 184.5   | 184.0 |
| OH+HCN→HNO+CH                                   | 130.5 <sup>a</sup> | 131.2 | 131.2   | 125.6 | 118.0 | 118.1   | 118.7 |
| OH+CN→HCO+N                                     | 9.1 <sup>a</sup>   | -2.9  | -2.9    | 0.1   | 1.5   | 1.5     | 7.3   |
| OH+CN→HNO+C                                     | 82.7 <sup>a</sup>  | 73.7  | 73.6    | 73.4  | 71.9  | 71.8    | 76.7  |
| OH+trans-HO3→HO2+HO2                            | -10.6 <sup>a</sup> | -19.7 | -19.6   | -16.5 | -15.5 | -15.4   | -12.2 |
| OH+O3→HO2+O2                                    | -41.7 <sup>a</sup> | -44.4 | -44.4   | -41.4 | -56.9 | -56.9   | -54.5 |
| OH+H2O2→HO2+H2O                                 | -32.2 <sup>a</sup> | -32.9 | -32.8   | -32.8 | -30.3 | -30.2   | -27.4 |
| OH+H2O→HO2+H2                                   | 55.2 <sup>a</sup>  | 48.5  | 48.5    | 56.4  | 55.2  | 55.1    | 58.0  |
| OH+trans-H2N2→HNO+NH2                           | 15.3 <sup>a</sup>  | 20.3  | 20.4    | 14.6  | 15.8  | 15.9    | 9.7   |
| OH+propyne→HCO+C2H4                             | -30.7 <sup>a</sup> | -37.3 | -37.1   | -36.0 | -38.7 | -38.5   | -36.3 |
| OH+propene→HCO+C2H6                             | -23.7 <sup>a</sup> | -30.3 | -29.9   | -29.1 | -33.1 | -32.6   | -29.8 |
| OH+C2H3F→HOF+C2H3                               | 76.4 <sup>a</sup>  | 76.8  | 77.0    | 77.7  | 78.0  | 78.3    | 80.2  |
| OH+C2H3F→HCO+CH3F                               | -21.3 <sup>a</sup> | -32.9 | -32.6   | -30.6 | -32.3 | -31.9   | -29.9 |
| OH+C2H4→HCO+CH4                                 | -28.5 <sup>a</sup> | -36.6 | -36.3   | -35.6 | -39.4 | -39.0   | -36.4 |
| OH+C2H3→HCO+CH3                                 | -34.0 <sup>a</sup> | -37.3 | -37.1   | -36.9 | -37.3 | -37.0   | -36.7 |
| OH+C2F2→HCO+CF2                                 | -44.9 <sup>a</sup> | -66.2 | -66.1   | -62.0 | -61.9 | -61.8   | -51.2 |
| OH+HCCF→HOF+C2H                                 | 80.9 <sup>a</sup>  | 88.7  | 88.7    | 89.4  | 80.6  | 80.6    | 94.6  |
| OH+C2H2→HCO+CH2                                 | 42.6 <sup>a</sup>  | 35.6  | 35.7    | 34.6  | 30.3  | 30.4    | 32.1  |
| OH+CF2→HCO+F2                                   | 47.5 <sup>a</sup>  | 53.0  | 53.0    | 50.6  | 51.6  | 51.6    | 49.0  |
| OH+CF2→HOF+CF                                   | 74.6 <sup>a</sup>  | 83.8  | 83.9    | 87.5  | 86.1  | 86.2    | 86.2  |
| OH+CH2 ( <sup>3</sup> B <sub>1</sub> )→HCO+H2   | -91.0 <sup>a</sup> | -97.0 | -97.1   | -90.5 | -95.9 | -96.0   | -91.7 |
| OH+CF→HOF+C                                     | 81.3 <sup>a</sup>  | 93.9  | 93.9    | 92.7  | 96.5  | 96.5    | 93.4  |
| OH+CF→HCO+F                                     | -39.5 <sup>a</sup> | -39.0 | -39.1   | -41.6 | -42.2 | -42.4   | -44.5 |
| OH+F2→HOF+F                                     | -12.4 <sup>a</sup> | -8.2  | -8.3    | -4.7  | -7.6  | -7.7    | -7.3  |
| OH+O2→HO2+O                                     | 52.5 <sup>a</sup>  | 47.6  | 47.5    | 48.7  | 57.2  | 57.1    | 57.5  |
| OH+N2→HNO+N                                     | 129.8 <sup>a</sup> | 125.0 | 125.0   | 124.2 | 106.0 | 105.9   | 114.2 |
| OF+CH3F→FOF+CH3                                 | 74.4 <sup>a</sup>  | 72.7  | 72.7    | 69.3  | 74.2  | 74.3    | 73.1  |
| OF+FOOF→FOF+FOO                                 | -23.1 <sup>a</sup> | -14.9 | -14.9   | -15.6 | -22.4 | -22.3   | -21.5 |
| OF+FOO→FOF+O2                                   | -26.8 <sup>a</sup> | -44.0 | -44.0   | -44.3 | -45.0 | -45.0   | -41.8 |
| OF+FOF→FOO+F2                                   | -26.9 <sup>a</sup> | -11.4 | -11.5   | -14.2 | -16.6 | -16.6   | -16.4 |
| OF+HOF→FOO+HF                                   | -64.6 <sup>a</sup> | -51.2 | -51.3   | -59.0 | -58.6 | -58.6   | -59.3 |
| OF+OF→FOF+O                                     | 12.4 <sup>a</sup>  | -44.4 | -44.6   | 3.2   | -40.8 | -41.1   | 7.2   |
| OF+OF→FOO+F                                     | -28.6 <sup>a</sup> | -68.7 | -68.9   | -20.9 | -71.2 | -71.6   | -24.0 |
| OF+O2N→FOO+NO                                   | -6.5 <sup>a</sup>  | 10.2  | 10.3    | 12.6  | 3.5   | 3.6     | 5.7   |
| OF+N2O→FOO+N2                                   | -39.3 <sup>a</sup> | -30.5 | -30.4   | -27.8 | -34.5 | -34.4   | -29.4 |
| OF+trans-HONO→FOO+HNO                           | 25.1 <sup>a</sup>  | 29.6  | 29.6    | 27.1  | 23.5  | 23.6    | 25.1  |
| OF+HNCO→FOO+HCN                                 | 39.7 <sup>a</sup>  | 22.4  | 22.5    | 27.8  | 29.6  | 29.8    | 34.7  |
| OF+NO→FOO+N                                     | 71.1 <sup>a</sup>  | 81.2  | 81.1    | 82.0  | 87.2  | 87.1    | 87.7  |
| OF+oxirene→FOO+C2H2                             | -31.1 <sup>a</sup> | -19.4 | -19.3   | -20.1 | -21.3 | -21.1   | -23.8 |
| OF+oxirane→FOO+C2H4                             | 5.8 <sup>a</sup>   | 19.0  | 19.1    | 16.3  | 13.0  | 13.2    | 8.7   |
| OF+methanol→FOO+CH4                             | 11.4 <sup>a</sup>  | 20.6  | 20.7    | 21.6  | 19.5  | 19.8    | 19.5  |
| OF+trans-HCOH→FOO+CH2                           | 50.1 <sup>a</sup>  | 75.7  | 75.7    | 75.5  | 70.0  | 70.0    | 64.7  |
| OF+formic acid→FOO+trans-HCO                    | 97.8 <sup>a</sup>  | 88.4  | 88.5    | 87.7  | 86.9  | 87.1    | 92.1  |
| OF+ketene→FOO+CH2C                              | 91.9 <sup>a</sup>  | 83.3  | 83.4    | 83.8  | 86.6  | 86.7    | 87.6  |
| OF+glyoxal→FOO+oxirene                          | 97.4 <sup>a</sup>  | 118.0 | 118.4   | 118.1 | 117.0 | 117.5   | 119.6 |
| OF+acetaldehyde→FOO+C2H4                        | 32.1 <sup>a</sup>  | 49.1  | 49.3    | 49.2  | 50.0  | 50.3    | 49.9  |
| OF+F2CO→FOO+CF2                                 | 80.2 <sup>a</sup>  | 70.9  | 71.0    | 74.7  | 71.7  | 71.9    | 81.2  |
| OF+HFCO→FOF+HCO                                 | 83.6 <sup>a</sup>  | 61.7  | 61.7    | 60.6  | 63.7  | 63.9    | 67.7  |
| OF+H2CO→FOO+CH2 ( <sup>3</sup> B <sub>1</sub> ) | 102.3 <sup>a</sup> | 117.3 | 117.4   | 114.6 | 113.9 | 114.1   | 112.9 |

... continued on next page ...

Table S30: ... continued from previous page ...

| Species              | Ref.               | OM2   | OM2-D3T | ODM2  | OM3   | OM3-D3T | ODM3  |
|----------------------|--------------------|-------|---------|-------|-------|---------|-------|
| OF+HCO→FOO+CH        | 113.6 <sup>a</sup> | 132.8 | 132.8   | 129.0 | 132.0 | 132.0   | 127.0 |
| OF+CO2→FOO+CO        | 48.8 <sup>a</sup>  | 52.2  | 52.2    | 55.0  | 55.9  | 56.0    | 62.4  |
| OF+CO→FOO+C          | 178.1 <sup>a</sup> | 182.0 | 181.9   | 180.1 | 179.6 | 179.5   | 175.5 |
| OF+trans-HO3→FOO+HO2 | -23.9 <sup>a</sup> | -18.3 | -18.3   | -17.7 | -20.4 | -20.4   | -20.7 |
| OF+O3→FOO+O2         | -55.0 <sup>a</sup> | -43.1 | -43.1   | -42.6 | -61.8 | -61.8   | -63.0 |
| OF+H2O2→FOO+H2O      | -45.5 <sup>a</sup> | -31.5 | -31.5   | -34.0 | -35.2 | -35.1   | -35.9 |
| OF+H2O→FOO+H2        | 41.8 <sup>a</sup>  | 49.8  | 49.8    | 55.2  | 50.2  | 50.1    | 49.5  |
| OF+C2H3F→FOF+C2H3    | 87.1 <sup>a</sup>  | 77.1  | 77.2    | 75.7  | 79.1  | 79.4    | 80.0  |
| OF+HCCF→FOF+C2H      | 91.6 <sup>a</sup>  | 88.9  | 89.0    | 87.4  | 81.7  | 81.7    | 94.3  |
| OF+CF2→FOF+CF        | 85.4 <sup>a</sup>  | 84.1  | 84.1    | 85.5  | 87.2  | 87.3    | 85.9  |
| OF+CF→FOF+C          | 92.0 <sup>a</sup>  | 94.2  | 94.2    | 90.7  | 97.6  | 97.6    | 93.1  |
| OF+F2→FOF+F          | -1.7 <sup>a</sup>  | -7.9  | -8.0    | -6.7  | -6.5  | -6.6    | -7.6  |
| OF+O2→FOO+O          | 39.2 <sup>a</sup>  | 48.9  | 48.8    | 47.5  | 52.3  | 52.2    | 49.0  |

a A.Karton, S.Daon, J.M.Martin, Chem.Phys.Lett. 510, 165 (2011).

Table S31: Benchmark Results for the ISOMER20 Subset of the W4-11-CHNOF Set. Reaction Energies (kcal/mol)

| Species                                                                                       | Ref.              | OM2  | OM2-D3T | ODM2 | OM3  | OM3-D3T | ODM3  |
|-----------------------------------------------------------------------------------------------|-------------------|------|---------|------|------|---------|-------|
| The OM $x$ and OM $x$ -D3T energies are uncorrected atomization enthalpies at 298 K           |                   |      |         |      |      |         |       |
| trans-HONO→cis-HONO                                                                           | 0.4 <sup>a</sup>  | -4.6 | -4.6    | -6.4 | -2.9 | -2.9    | -2.5  |
| HCN→HNC                                                                                       | 15.2 <sup>a</sup> | 17.6 | 17.5    | 13.2 | 2.0  | 1.9     | -2.9  |
| HNCO→HOCN                                                                                     | 24.7 <sup>a</sup> | 6.9  | 6.9     | 11.2 | 14.8 | 14.8    | 17.6  |
| HNCO→HONC                                                                                     | 84.6 <sup>a</sup> | 58.8 | 58.8    | 59.7 | 58.6 | 58.6    | 53.7  |
| HNCO→HCNO                                                                                     | 69.8 <sup>a</sup> | 50.0 | 50.0    | 50.4 | 55.5 | 55.5    | 61.9  |
| HOCN→HONC                                                                                     | 59.9 <sup>a</sup> | 51.9 | 51.9    | 48.6 | 43.9 | 43.8    | 36.1  |
| HOCN→HCNO                                                                                     | 45.1 <sup>a</sup> | 43.1 | 43.1    | 39.2 | 40.7 | 40.7    | 44.2  |
| HCNO→HONC                                                                                     | 14.8 <sup>a</sup> | 8.8  | 8.8     | 9.4  | 3.1  | 3.1     | -8.1  |
| formaldehyde→trans-HCOH                                                                       | 52.2 <sup>a</sup> | 40.5 | 40.5    | 39.0 | 43.2 | 43.3    | 48.1  |
| trans-HCOH→cis-HCOH                                                                           | 4.8 <sup>a</sup>  | 1.3  | 1.3     | 3.3  | 6.2  | 6.2     | 7.1   |
| HCCH→H2CC                                                                                     | 45.6 <sup>a</sup> | 31.3 | 31.2    | 32.0 | 31.1 | 31.0    | 33.9  |
| trans-HO3→cis-HO3                                                                             | 0.2 <sup>a</sup>  | -5.7 | -5.7    | -4.9 | -0.7 | -0.8    | -0.5  |
| trans-H2N2→cis-H2N2                                                                           | 5.4 <sup>a</sup>  | -3.2 | -3.2    | -2.1 | 2.3  | 2.2     | 2.0   |
| propyne→allene                                                                                | 1.5 <sup>a</sup>  | -0.0 | -0.1    | 0.4  | -0.0 | -0.1    | 0.4   |
| formic acid→dioxirane                                                                         | 91.9 <sup>a</sup> | 79.0 | 79.1    | 90.2 | 93.4 | 93.5    | 101.5 |
| ketene→oxirene                                                                                | 77.4 <sup>a</sup> | 69.4 | 69.4    | 72.0 | 74.6 | 74.6    | 77.5  |
| acetaldehyde→oxirane                                                                          | 26.3 <sup>a</sup> | 30.5 | 30.6    | 32.9 | 37.3 | 37.5    | 41.2  |
| H2CN→HN=CH                                                                                    | 7.5 <sup>a</sup>  | 6.9  | 6.9     | 3.9  | -0.5 | -0.5    | -0.6  |
| H2NCH2→H3CNH                                                                                  | 7.7 <sup>a</sup>  | 12.2 | 12.2    | 11.4 | 13.3 | 13.3    | 8.9   |
| The OM $x$ and OM $x$ -D3T energies are corrected by excluding ZPVE and thermal contributions |                   |      |         |      |      |         |       |
| trans-HONO→cis-HONO                                                                           | 0.4 <sup>a</sup>  | -4.8 | -4.8    | -6.4 | -3.0 | -3.1    | -2.5  |
| HCN→HNC                                                                                       | 15.2 <sup>a</sup> | 18.3 | 18.2    | 13.2 | 2.2  | 2.2     | -2.9  |
| HNCO→HOCN                                                                                     | 24.7 <sup>a</sup> | 6.6  | 6.7     | 11.2 | 14.3 | 14.3    | 17.6  |
| HNCO→HONC                                                                                     | 84.6 <sup>a</sup> | 59.0 | 59.0    | 59.7 | 58.6 | 58.5    | 53.7  |
| HNCO→HCNO                                                                                     | 69.8 <sup>a</sup> | 49.7 | 49.7    | 50.4 | 55.4 | 55.5    | 61.9  |
| HOCN→HONC                                                                                     | 59.9 <sup>a</sup> | 52.4 | 52.4    | 48.6 | 44.3 | 44.2    | 36.1  |
| HOCN→HCNO                                                                                     | 45.1 <sup>a</sup> | 43.1 | 43.1    | 39.2 | 41.2 | 41.2    | 44.2  |
| HCNO→HONC                                                                                     | 14.8 <sup>a</sup> | 9.3  | 9.3     | 9.4  | 3.1  | 3.1     | -8.1  |
| formaldehyde→trans-HCOH                                                                       | 52.2 <sup>a</sup> | 41.6 | 41.6    | 39.0 | 44.0 | 44.0    | 48.1  |
| trans-HCOH→cis-HCOH                                                                           | 4.8 <sup>a</sup>  | 1.5  | 1.5     | 3.3  | 6.5  | 6.5     | 7.1   |
| HCCH→H2CC                                                                                     | 45.6 <sup>a</sup> | 32.3 | 32.2    | 32.0 | 32.3 | 32.1    | 33.9  |
| trans-HO3→cis-HO3                                                                             | 0.2 <sup>a</sup>  | -5.7 | -5.7    | -4.9 | -0.8 | -0.8    | -0.5  |
| trans-H2N2→cis-H2N2                                                                           | 5.4 <sup>a</sup>  | -3.1 | -3.1    | -2.1 | 2.5  | 2.5     | 2.0   |
| propyne→allene                                                                                | 1.5 <sup>a</sup>  | 0.3  | 0.2     | 0.4  | 0.3  | 0.2     | 0.4   |
| formic acid→dioxirane                                                                         | 91.9 <sup>a</sup> | 78.5 | 78.6    | 90.2 | 93.7 | 93.8    | 101.5 |
| ketene→oxirene                                                                                | 77.4 <sup>a</sup> | 70.5 | 70.5    | 72.0 | 75.6 | 75.6    | 77.5  |
| acetaldehyde→oxirane                                                                          | 26.3 <sup>a</sup> | 30.1 | 30.2    | 32.9 | 37.0 | 37.1    | 41.2  |
| H2CN→HN=CH                                                                                    | 7.5 <sup>a</sup>  | 7.1  | 7.2     | 3.9  | -0.2 | -0.2    | -0.6  |
| H2NCH2→H3CNH                                                                                  | 7.7 <sup>a</sup>  | 12.1 | 12.1    | 11.4 | 13.4 | 13.4    | 8.9   |

a A.Karton, S.Daon, J.M.Martin, Chem.Phys.Lett. 510, 165 (2011).

Table S32: Benchmark Results for the SN13 Subset of the W4-11-CHNOF Set. Reaction Energies (kcal/mol)

| Species                                                                                       | Ref.              | OM2  | OM2-D3T | ODM2 | OM3  | OM3-D3T | ODM3 |
|-----------------------------------------------------------------------------------------------|-------------------|------|---------|------|------|---------|------|
| The OM $x$ and OM $x$ -D3T energies are uncorrected atomization enthalpies at 298 K           |                   |      |         |      |      |         |      |
| CH3F+H→F+CH4                                                                                  | 2.5 <sup>a</sup>  | 7.3  | 7.3     | 1.6  | 4.8  | 4.9     | 2.0  |
| CH2F2+H→F+CH3F                                                                                | 14.7 <sup>a</sup> | 14.7 | 14.7    | 11.1 | 14.3 | 14.4    | 10.3 |
| CH3F+CH3→F+C2H6                                                                               | 17.8 <sup>a</sup> | 24.3 | 23.7    | 21.4 | 19.6 | 18.7    | 20.1 |
| CH2F2+CH3→F+C2H5F                                                                             | 24.0 <sup>a</sup> | 26.3 | 25.7    | 25.0 | 23.2 | 22.3    | 22.6 |
| C2H5F+CH3→F+propane                                                                           | 21.5 <sup>a</sup> | 26.9 | 26.0    | 24.3 | 23.3 | 22.1    | 23.2 |
| CH3F+NH2→F+CH3NH2                                                                             | 23.2 <sup>a</sup> | 28.2 | 27.7    | 27.7 | 31.5 | 30.7    | 33.6 |
| CH3F+NH→F+CH3NH                                                                               | 31.4 <sup>a</sup> | 36.2 | 35.9    | 35.3 | 35.7 | 35.1    | 36.4 |
| CH3F+OH→F+CH3OH                                                                               | 16.7 <sup>a</sup> | 25.7 | 25.4    | 22.6 | 22.7 | 22.3    | 23.0 |
| CH3F+HCO→F+CH3COH                                                                             | 24.5 <sup>a</sup> | 34.2 | 33.7    | 30.7 | 31.9 | 31.0    | 29.0 |
| CH3+FHCO→F+CH3COH                                                                             | 33.8 <sup>a</sup> | 24.4 | 23.9    | 22.0 | 23.0 | 22.1    | 23.5 |
| FHCO+H→F+H2CO                                                                                 | 29.1 <sup>a</sup> | 19.6 | 19.6    | 15.3 | 20.4 | 20.5    | 18.3 |
| F2CO+H→F+FHCO                                                                                 | 16.9 <sup>a</sup> | 16.9 | 17.0    | 15.3 | 17.6 | 17.6    | 14.4 |
| FHCO+HCO→F+glyoxal                                                                            | 48.1 <sup>a</sup> | 42.2 | 41.7    | 40.0 | 45.3 | 44.4    | 43.8 |
| The OM $x$ and OM $x$ -D3T energies are corrected by excluding ZPVE and thermal contributions |                   |      |         |      |      |         |      |
| CH3F+H→F+CH4                                                                                  | 2.5 <sup>a</sup>  | 3.6  | 3.6     | 1.6  | 1.3  | 1.3     | 2.0  |
| CH2F2+H→F+CH3F                                                                                | 14.7 <sup>a</sup> | 10.7 | 10.7    | 11.1 | 10.4 | 10.5    | 10.3 |
| CH3F+CH3→F+C2H6                                                                               | 17.8 <sup>a</sup> | 21.2 | 20.5    | 21.4 | 16.4 | 15.5    | 20.1 |
| CH2F2+CH3→F+C2H5F                                                                             | 24.0 <sup>a</sup> | 23.1 | 22.5    | 25.0 | 19.9 | 19.0    | 22.6 |
| C2H5F+CH3→F+propane                                                                           | 21.5 <sup>a</sup> | 23.8 | 22.9    | 24.3 | 20.1 | 18.8    | 23.2 |
| CH3F+NH2→F+CH3NH2                                                                             | 23.2 <sup>a</sup> | 25.4 | 24.9    | 27.7 | 29.2 | 28.5    | 33.6 |
| CH3F+NH→F+CH3NH                                                                               | 31.4 <sup>a</sup> | 34.8 | 34.5    | 35.3 | 34.7 | 34.1    | 36.4 |
| CH3F+OH→F+CH3OH                                                                               | 16.7 <sup>a</sup> | 24.3 | 24.0    | 22.6 | 21.2 | 20.8    | 23.0 |
| CH3F+HCO→F+CH3COH                                                                             | 24.5 <sup>a</sup> | 32.3 | 31.7    | 30.7 | 30.2 | 29.3    | 29.0 |
| CH3+FHCO→F+CH3COH                                                                             | 33.8 <sup>a</sup> | 21.3 | 20.7    | 22.0 | 19.7 | 18.9    | 23.5 |
| FHCO+H→F+H2CO                                                                                 | 29.1 <sup>a</sup> | 16.1 | 16.1    | 15.3 | 17.0 | 17.1    | 18.3 |
| F2CO+H→F+FHCO                                                                                 | 16.9 <sup>a</sup> | 13.1 | 13.1    | 15.3 | 13.7 | 13.7    | 14.4 |
| FHCO+HCO→F+glyoxal                                                                            | 48.1 <sup>a</sup> | 40.4 | 39.9    | 40.0 | 44.4 | 43.5    | 43.8 |

a A.Karton, S.Daon, J.M.Martin, Chem.Phys.Lett. 510, 165 (2011).

Table S33: Benchmark Results for the MB08–165 Subset of the GMTKN30-CHNOF Set.  
Reaction Energies (kcal/mol)

| Species                                                                                                 | Ref.                | OM2    | OM2-D3T | ODM2   | OM3    | OM3-D3T | ODM3   |
|---------------------------------------------------------------------------------------------------------|---------------------|--------|---------|--------|--------|---------|--------|
| The OM <i>x</i> and OM <i>x</i> -D3T energies are uncorrected atomization enthalpies at 298 K           |                     |        |         |        |        |         |        |
| 001                                                                                                     | 129.0 <sup>a</sup>  | 112.3  | 113.4   | 133.0  | 114.1  | 115.5   | 125.7  |
| 069                                                                                                     | 201.2 <sup>a</sup>  | 152.7  | 154.7   | 206.1  | 190.2  | 193.1   | 214.5  |
| 075                                                                                                     | 32.6 <sup>a</sup>   | 20.8   | 22.4    | 2.5    | 30.6   | 32.9    | 37.8   |
| 079                                                                                                     | 139.5 <sup>a</sup>  | 124.7  | 126.0   | 141.6  | 133.7  | 135.5   | 139.3  |
| 082                                                                                                     | -120.4 <sup>a</sup> | -98.5  | -97.2   | -124.7 | -95.8  | -93.8   | -111.8 |
| 084                                                                                                     | -18.3 <sup>a</sup>  | -15.9  | -15.4   | -23.6  | -15.9  | -15.2   | -20.0  |
| 085                                                                                                     | -117.7 <sup>a</sup> | -96.4  | -96.8   | -146.8 | -108.8 | -109.8  | -142.0 |
| 090                                                                                                     | -109.0 <sup>a</sup> | -106.0 | -105.4  | -107.2 | -103.8 | -103.2  | -108.3 |
| 099                                                                                                     | 67.9 <sup>a</sup>   | 59.7   | 60.8    | 65.0   | 58.8   | 60.3    | 65.4   |
| 101                                                                                                     | 20.5 <sup>a</sup>   | 5.2    | 6.4     | 23.7   | 8.9    | 10.6    | 15.5   |
| 103                                                                                                     | -171.7 <sup>a</sup> | -93.2  | -91.7   | -130.8 | -100.0 | -97.6   | -126.5 |
| 105                                                                                                     | -107.3 <sup>a</sup> | -107.8 | -106.4  | -128.5 | -97.7  | -95.6   | -114.8 |
| 107                                                                                                     | -124.8 <sup>a</sup> | -114.6 | -112.4  | -103.0 | -97.4  | -94.0   | -97.5  |
| 109                                                                                                     | -8.5 <sup>a</sup>   | -25.0  | -23.8   | -3.0   | -9.1   | -7.3    | 0.1    |
| 111                                                                                                     | -362.4 <sup>a</sup> | -333.9 | -333.2  | -406.2 | -315.3 | -314.4  | -375.2 |
| 115                                                                                                     | -67.9 <sup>a</sup>  | -62.7  | -61.3   | -68.9  | -59.1  | -57.0   | -75.4  |
| 117                                                                                                     | -25.5 <sup>a</sup>  | -0.8   | -0.5    | -46.1  | -5.5   | -5.2    | -26.8  |
| 123                                                                                                     | -125.6 <sup>a</sup> | -140.6 | -138.4  | -126.8 | -122.2 | -118.9  | -121.2 |
| 129                                                                                                     | -570.6 <sup>a</sup> | -472.6 | -472.8  | -633.0 | -503.9 | -504.5  | -606.0 |
| 139                                                                                                     | -266.7 <sup>a</sup> | -231.1 | -229.5  | -249.2 | -215.8 | -213.5  | -242.6 |
| 143                                                                                                     | -192.4 <sup>a</sup> | -163.1 | -161.7  | -192.5 | -147.7 | -145.5  | -167.6 |
| 151                                                                                                     | -225.2 <sup>a</sup> | -219.4 | -218.7  | -263.5 | -209.9 | -209.2  | -247.5 |
| 152                                                                                                     | 59.2 <sup>a</sup>   | 42.5   | 44.3    | 58.1   | 62.9   | 65.4    | 66.4   |
| 157                                                                                                     | -240.7 <sup>a</sup> | -217.8 | -217.7  | -270.4 | -231.3 | -231.2  | -267.3 |
| 164                                                                                                     | 52.3 <sup>a</sup>   | 41.7   | 43.5    | 62.1   | 64.0   | 66.5    | 71.5   |
| The OM <i>x</i> and OM <i>x</i> -D3T energies are corrected by excluding ZPVE and thermal contributions |                     |        |         |        |        |         |        |
| 001                                                                                                     | 129.0 <sup>a</sup>  | 122.7  | 123.9   | 133.0  | 125.5  | 126.9   | 125.7  |
| 069                                                                                                     | 201.2 <sup>a</sup>  | 177.4  | 180.7   | 206.1  | 212.5  | 217.9   | 214.5  |
| 075                                                                                                     | 32.6 <sup>a</sup>   | 14.4   | 16.0    | 2.5    | 25.4   | 27.7    | 37.8   |
| 079                                                                                                     | 139.5 <sup>a</sup>  | 132.9  | 134.3   | 141.6  | 133.4  | 143.6   | 139.3  |
| 082                                                                                                     | -120.4 <sup>a</sup> | -112.6 | -111.2  | -124.7 | -108.7 | -106.6  | -111.8 |
| 084                                                                                                     | -18.3 <sup>a</sup>  | -20.1  | -19.6   | -23.6  | -19.6  | -18.9   | -20.0  |
| 085                                                                                                     | -117.7 <sup>a</sup> | -129.6 | -123.3  | -146.8 | -142.6 | -140.0  | -142.0 |
| 090                                                                                                     | -109.0 <sup>a</sup> | -110.9 | -107.8  | -107.2 | -110.0 | -106.2  | -108.3 |
| 099                                                                                                     | 67.9 <sup>a</sup>   | 62.6   | 63.7    | 65.0   | 62.9   | 64.5    | 65.4   |
| 101                                                                                                     | 20.5 <sup>a</sup>   | 12.9   | 13.6    | 23.7   | 14.7   | 18.3    | 15.5   |
| 103                                                                                                     | -171.7 <sup>a</sup> | -116.6 | -115.0  | -130.8 | -120.2 | -117.8  | -126.5 |
| 105                                                                                                     | -107.3 <sup>a</sup> | -122.0 | -120.6  | -128.5 | -110.5 | -108.4  | -114.8 |
| 107                                                                                                     | -124.8 <sup>a</sup> | -104.8 | -102.5  | -103.0 | -88.4  | -84.9   | -97.5  |
| 109                                                                                                     | -8.5 <sup>a</sup>   | -10.2  | -9.0    | -3.0   | 3.3    | 6.3     | 0.1    |
| 111                                                                                                     | -362.4 <sup>a</sup> | -379.1 | -378.3  | -406.2 | -356.0 | -355.1  | -375.2 |
| 115                                                                                                     | -67.9 <sup>a</sup>  | -63.3  | -61.9   | -68.9  | -64.1  | -57.2   | -75.4  |
| 117                                                                                                     | -25.5 <sup>a</sup>  | -26.8  | -26.5   | -46.1  | -31.0  | -28.2   | -26.8  |
| 123                                                                                                     | -125.6 <sup>a</sup> | -130.6 | -128.4  | -126.8 | -112.3 | -108.9  | -121.2 |
| 129                                                                                                     | -570.6 <sup>a</sup> | -579.7 | -579.8  | -633.0 | -601.6 | -602.3  | -606.0 |
| 139                                                                                                     | -266.7 <sup>a</sup> | -244.5 | -242.9  | -249.2 | -228.8 | -226.5  | -242.6 |
| 143                                                                                                     | -192.4 <sup>a</sup> | -178.1 | -176.7  | -192.5 | -161.0 | -158.8  | -167.6 |
| 151                                                                                                     | -225.2 <sup>a</sup> | -245.5 | -244.9  | -263.5 | -237.2 | -234.0  | -247.5 |
| 152                                                                                                     | 59.2 <sup>a</sup>   | 48.3   | 50.0    | 58.1   | 70.3   | 72.9    | 66.4   |
| 157                                                                                                     | -240.7 <sup>a</sup> | -254.6 | -254.5  | -270.4 | -264.7 | -264.7  | -267.3 |
| 164                                                                                                     | 52.3 <sup>a</sup>   | 48.7   | 50.5    | 62.1   | 70.9   | 73.5    | 71.5   |

<sup>a</sup> L.Goerigk and S.Grimme, J.Chem.Theory Comput. 6, 107 (2010) ; M.Korth and S.Grimme, J.Chem.Theory Comput. 5, 993-1003 (2010).

Table S34: Benchmark Results for the W4-08 Subset of the GMTKN30-CHNOF Set. Atomization Energies at 0 K (kcal/mol). The OM*x* and OM*x*-D3T Energies Are Corrected by Excluding ZPVE and Thermal Contributions

| Species | Ref.               | OM2   | OM2-D3T | ODM2  | OM3   | OM3-D3T | ODM3  |
|---------|--------------------|-------|---------|-------|-------|---------|-------|
| c2h6    | 713.1 <sup>a</sup> | 712.4 | 714.2   | 713.4 | 711.5 | 714.4   | 712.0 |
| h2cn    | 343.8 <sup>a</sup> | 345.8 | 346.5   | 347.0 | 346.6 | 347.7   | 347.7 |
| nccn    | 502.0 <sup>a</sup> | 501.2 | 502.1   | 499.9 | 501.3 | 502.9   | 504.0 |
| ch2nh2  | 482.3 <sup>a</sup> | 485.9 | 487.1   | 488.6 | 488.9 | 490.8   | 488.0 |
| ch3nh   | 474.6 <sup>a</sup> | 473.9 | 475.0   | 477.2 | 475.5 | 477.4   | 479.1 |
| ch3nh2  | 582.3 <sup>a</sup> | 578.6 | 580.0   | 582.2 | 578.4 | 580.7   | 580.2 |
| cf2     | 258.8 <sup>a</sup> | 267.1 | 267.4   | 264.9 | 266.4 | 267.0   | 259.7 |
| n2h     | 224.9 <sup>a</sup> | 236.7 | 237.1   | 239.5 | 239.3 | 240.0   | 240.3 |
| n2h2    | 296.5 <sup>a</sup> | 300.0 | 300.7   | 303.6 | 312.1 | 313.1   | 309.4 |
| n2h4    | 438.3 <sup>a</sup> | 434.7 | 435.9   | 439.4 | 436.2 | 438.0   | 439.9 |
| fo2     | 134.7 <sup>a</sup> | 118.0 | 118.3   | 116.0 | 119.3 | 119.9   | 119.0 |
| foof    | 152.4 <sup>a</sup> | 147.5 | 148.0   | 144.8 | 137.7 | 138.6   | 137.8 |
| h2      | 109.5 <sup>a</sup> | 109.0 | 109.1   | 106.5 | 107.6 | 107.7   | 108.4 |
| oh      | 107.2 <sup>a</sup> | 109.9 | 110.0   | 111.1 | 110.7 | 110.8   | 112.0 |
| hf      | 141.6 <sup>a</sup> | 137.2 | 137.2   | 144.0 | 139.9 | 140.0   | 139.9 |
| h2o     | 233.0 <sup>a</sup> | 229.4 | 229.6   | 231.8 | 230.4 | 230.7   | 230.0 |
| ch      | 84.2 <sup>a</sup>  | 86.0  | 86.2    | 90.3  | 88.0  | 88.2    | 91.5  |
| ch2     | 190.7 <sup>a</sup> | 191.5 | 191.8   | 194.3 | 193.6 | 194.0   | 195.3 |
| ch3     | 307.9 <sup>a</sup> | 308.3 | 308.7   | 310.6 | 305.8 | 306.6   | 309.3 |
| ch4     | 420.4 <sup>a</sup> | 421.7 | 422.4   | 422.7 | 420.2 | 421.3   | 420.8 |
| c2h     | 266.2 <sup>a</sup> | 261.0 | 284.3   | 263.1 | 275.2 | 275.9   | 263.4 |
| c2h2    | 405.5 <sup>a</sup> | 404.7 | 405.3   | 405.5 | 404.4 | 405.4   | 405.5 |
| nh3     | 298.0 <sup>a</sup> | 291.7 | 292.1   | 297.9 | 296.0 | 296.7   | 297.5 |
| c2      | 147.0 <sup>a</sup> | 147.7 | 148.0   | 150.6 | 125.7 | 126.2   | 124.8 |
| n2      | 228.5 <sup>a</sup> | 226.1 | 226.3   | 227.5 | 216.2 | 216.5   | 222.8 |
| co      | 259.7 <sup>a</sup> | 250.6 | 250.8   | 248.5 | 250.8 | 251.1   | 247.0 |
| cn      | 181.3 <sup>a</sup> | 174.7 | 175.0   | 176.7 | 182.1 | 182.5   | 185.3 |
| no      | 152.8 <sup>a</sup> | 149.5 | 149.6   | 150.1 | 157.7 | 158.0   | 159.0 |
| o2      | 120.8 <sup>a</sup> | 117.7 | 117.8   | 116.1 | 123.5 | 123.7   | 120.4 |
| of      | 53.1 <sup>a</sup>  | 49.3  | 49.4    | 47.6  | 48.1  | 48.3    | 47.5  |
| f2      | 39.0 <sup>a</sup>  | 37.3  | 37.4    | 38.5  | 35.6  | 35.8    | 34.2  |
| nh      | 83.1 <sup>a</sup>  | 83.4  | 83.5    | 88.2  | 88.8  | 89.0    | 92.7  |
| nh2     | 182.6 <sup>a</sup> | 178.7 | 178.9   | 185.7 | 186.1 | 186.6   | 191.0 |
| hcn     | 313.4 <sup>a</sup> | 318.3 | 318.7   | 319.2 | 316.2 | 316.9   | 318.8 |
| hof     | 158.7 <sup>a</sup> | 154.6 | 154.8   | 153.5 | 152.6 | 153.0   | 152.0 |
| cf      | 132.7 <sup>a</sup> | 138.4 | 138.5   | 134.7 | 138.3 | 138.6   | 133.2 |
| ch2c    | 359.9 <sup>a</sup> | 372.5 | 373.2   | 373.5 | 372.1 | 373.3   | 371.5 |
| ch2ch   | 446.1 <sup>a</sup> | 448.6 | 449.5   | 450.3 | 449.8 | 451.3   | 450.6 |
| c2h4    | 564.1 <sup>a</sup> | 562.8 | 563.9   | 563.7 | 561.3 | 563.3   | 562.4 |
| ch2nh   | 439.4 <sup>a</sup> | 438.0 | 438.9   | 441.2 | 440.8 | 442.3   | 441.4 |
| hco     | 279.4 <sup>a</sup> | 287.5 | 287.9   | 287.7 | 291.2 | 291.8   | 290.0 |
| ch2o    | 374.7 <sup>a</sup> | 377.5 | 378.0   | 377.4 | 378.7 | 379.6   | 379.7 |
| co2     | 390.1 <sup>a</sup> | 371.5 | 371.9   | 372.1 | 377.9 | 378.6   | 380.9 |
| hmo     | 205.9 <sup>a</sup> | 211.0 | 211.3   | 214.4 | 220.8 | 221.4   | 220.6 |
| no2     | 227.9 <sup>a</sup> | 228.7 | 229.2   | 231.5 | 233.2 | 233.9   | 236.4 |
| n2o     | 270.9 <sup>a</sup> | 264.3 | 264.8   | 268.2 | 253.0 | 253.8   | 264.9 |
| o3      | 147.4 <sup>a</sup> | 143.2 | 143.5   | 141.9 | 132.9 | 133.5   | 128.9 |
| hoo     | 175.5 <sup>a</sup> | 179.9 | 180.2   | 178.4 | 177.0 | 177.4   | 174.9 |
| h2o2    | 269.1 <sup>a</sup> | 266.5 | 267.0   | 266.3 | 266.4 | 267.2   | 265.6 |
| f2o     | 93.8 <sup>a</sup>  | 93.7  | 94.0    | 91.9  | 88.9  | 89.3    | 87.8  |

a L.Goerigk and S.Grimme, J.Chem.Theory Comput. 6, 107 (2010) ; A.Karton, A.Tarnopolsky, J.F.Lamere, G.C.Schatz, and J.M.L.Martin, J.Phys.Chem.A 112, 12868 (2008).

Table S35: Benchmark Results for the G21IP Subset of the GMTKN30-CHNOF Set. Ionization Energies (kcal/mol)

| Species                                                        | Ref.               | OM2   | OM2-D3T | ODM2  | OM3   | OM3-D3T | ODM3  |
|----------------------------------------------------------------|--------------------|-------|---------|-------|-------|---------|-------|
| H→H+                                                           | 314.9 <sup>a</sup> | 291.7 | 291.7   | 288.0 | 287.3 | 287.3   | 284.7 |
| C→C+                                                           | 259.6 <sup>a</sup> | 230.9 | 230.9   | 221.6 | 227.7 | 227.7   | 218.1 |
| N→N+                                                           | 335.3 <sup>a</sup> | 314.3 | 314.3   | 316.7 | 309.4 | 309.4   | 307.5 |
| O→O+                                                           | 313.8 <sup>a</sup> | 309.7 | 309.7   | 306.7 | 309.1 | 309.1   | 302.5 |
| F→F+                                                           | 401.7 <sup>a</sup> | 393.4 | 393.4   | 388.2 | 398.8 | 398.8   | 403.9 |
| CH <sub>4</sub> →CH <sub>4</sub> +                             | 296.3 <sup>a</sup> | 284.9 | 284.9   | 284.8 | 288.2 | 288.2   | 289.2 |
| NH <sub>3</sub> →NH <sub>3</sub> +                             | 235.7 <sup>a</sup> | 221.9 | 221.9   | 226.8 | 225.6 | 225.6   | 226.2 |
| OH→OH+                                                         | 300.9 <sup>a</sup> | 298.6 | 298.6   | 296.7 | 301.4 | 301.4   | 298.0 |
| H <sub>2</sub> O→H <sub>2</sub> O+                             | 292.6 <sup>a</sup> | 284.0 | 284.0   | 283.4 | 286.2 | 286.2   | 285.2 |
| HF→HF+                                                         | 371.3 <sup>a</sup> | 362.5 | 362.5   | 360.9 | 374.8 | 374.8   | 380.1 |
| C <sub>2</sub> H <sub>2</sub> →C <sub>2</sub> H <sub>2</sub> + | 264.6 <sup>a</sup> | 258.4 | 258.4   | 253.7 | 264.3 | 264.3   | 260.6 |
| C <sub>2</sub> H <sub>4</sub> →C <sub>2</sub> H <sub>4</sub> + | 243.7 <sup>a</sup> | 232.9 | 232.9   | 228.3 | 239.1 | 239.2   | 235.4 |
| CO→CO+                                                         | 323.0 <sup>a</sup> | 314.5 | 314.5   | 308.6 | 313.5 | 313.5   | 307.5 |
| N <sub>2</sub> →N <sub>2</sub> +                               | 359.4 <sup>a</sup> | 355.4 | 355.4   | 357.7 | 334.7 | 334.7   | 339.1 |
| O <sub>2</sub> →O <sub>2</sub> +                               | 277.7 <sup>a</sup> | 298.1 | 298.1   | 293.0 | 288.9 | 288.9   | 285.2 |

<sup>a</sup> L.Goerigk and S.Grimme, J.Chem.Theory Comput. 6, 107 (2010) ; L.A.Curtiss, K.Raghavachari, G.W.Trucks, and J.A.Pople, J.Chem.Phys. 94, 7221 (1991).

Table S36: Benchmark Results for the G21EA Subset of the GMTKN30-CHNOF Set. Electron Affinities (kcal/mol)

| Species    | Ref.              | OM2   | OM2-D3T | ODM2  | OM3  | OM3-D3T | ODM3  |
|------------|-------------------|-------|---------|-------|------|---------|-------|
| C- → C     | 29.2 <sup>a</sup> | 18.3  | 18.3    | 9.0   | 15.1 | 15.1    | 5.5   |
| O- → O     | 33.7 <sup>a</sup> | 28.1  | 28.1    | 25.2  | 27.6 | 27.6    | 20.9  |
| F- → F     | 78.4 <sup>a</sup> | 70.4  | 70.4    | 65.1  | 75.7 | 75.7    | 80.8  |
| CH- → CH   | 27.9 <sup>a</sup> | 18.0  | 18.0    | 9.6   | 18.1 | 18.1    | 9.5   |
| CH2- → CH2 | 13.4 <sup>a</sup> | 3.2   | 3.2     | -1.5  | 7.0  | 7.0     | 1.7   |
| CH3- → CH3 | 1.2 <sup>a</sup>  | -16.8 | -16.8   | -20.9 | -8.8 | -8.7    | -14.5 |
| NH- → NH   | 8.3 <sup>a</sup>  | -8.9  | -8.9    | -6.3  | -9.6 | -9.6    | -11.6 |
| NH2- → NH2 | 16.8 <sup>a</sup> | -3.8  | -3.8    | -0.7  | -0.5 | -0.5    | -2.6  |
| OH- → OH   | 41.7 <sup>a</sup> | 29.4  | 29.4    | 27.5  | 33.6 | 33.6    | 29.5  |
| O2- → O2   | 9.5 <sup>a</sup>  | 18.9  | 18.9    | 16.4  | 17.0 | 17.0    | 13.0  |
| NO- → NO   | -0.2 <sup>a</sup> | 13.2  | 13.2    | 13.0  | 10.0 | 10.0    | 6.7   |
| CN- → CN   | 89.5 <sup>a</sup> | 88.4  | 88.4    | 85.8  | 88.0 | 88.0    | 84.3  |

<sup>a</sup> L.Goerigk and S.Grimme, J.Chem.Theory Comput. 6, 107 (2010) ; L.A.Curtiss, K.Raghavachari, G.W.Trucks, and J.A.Pople, J.Chem.Phys. 94, 7221 (1991).



Table S37: Benchmark Results for the PA Subset of the GMTKN30-CHNOF Set. Proton Affinities (kcal/mol)

| Species             | Ref.               | OM2   | OM2-D3T | ODM2  | OM3   | OM3-D3T | ODM3  |
|---------------------|--------------------|-------|---------|-------|-------|---------|-------|
| C2H4 + H+ → C2H5+   | 167.8 <sup>a</sup> | 152.6 | 152.8   | 160.8 | 149.4 | 149.8   | 154.3 |
| C4H6 + H+ → C4H7+   | 193.4 <sup>a</sup> | 197.0 | 197.3   | 205.6 | 191.3 | 191.8   | 198.1 |
| C6H8 + H+ → C6H9+   | 209.7 <sup>a</sup> | 212.3 | 212.7   | 221.2 | 206.2 | 206.7   | 213.2 |
| C8H10 + H+ → C8H11+ | 219.7 <sup>a</sup> | 221.6 | 221.9   | 230.6 | 215.3 | 215.8   | 222.3 |
| NH3 + H+ → NH4+     | 211.9 <sup>a</sup> | 221.4 | 221.6   | 221.3 | 213.3 | 213.7   | 215.0 |
| H2O + H+ → H3O+     | 171.6 <sup>a</sup> | 167.6 | 167.8   | 172.3 | 165.7 | 166.0   | 165.8 |
| C2H2 + H+ → C2H3+   | 157.4 <sup>a</sup> | 134.0 | 134.2   | 142.4 | 134.0 | 134.4   | 139.1 |
| H2 + H+ → H3+       | 106.3 <sup>a</sup> | 47.9  | 48.0    | 40.1  | 69.4  | 69.6    | 65.2  |

a L.Goerigk and S.Grimme, J.Chem.Theory Comput. 6, 107 (2010).

Table S38: Benchmark Results for the SIE11 Subset of the GMTKN30-CHNOF Set. Reaction Energies (kcal/mol)

| Species                                                                                   | Ref.              | OM2  | OM2-D3T | ODM2 | OM3  | OM3-D3T | ODM3 |
|-------------------------------------------------------------------------------------------|-------------------|------|---------|------|------|---------|------|
| $[(\text{NH}_3)_2]^+ \rightarrow \text{NH}_3 + [\text{NH}_3]^+$                           | 35.3 <sup>a</sup> | 27.3 | 28.1    | 27.8 | 30.9 | 32.1    | 35.0 |
| $[(\text{H}_2\text{O})_2]^+ \rightarrow \text{H}_2\text{O} + [\text{H}_2\text{O}]^+$      | 37.2 <sup>a</sup> | 31.2 | 31.7    | 31.8 | 30.5 | 31.3    | 30.0 |
| $[\text{C}_4\text{H}_{10}]^+ \rightarrow \text{C}_2\text{H}_5 + [\text{C}_2\text{H}_5]^+$ | 35.3 <sup>a</sup> | 52.7 | 54.6    | 56.4 | 44.0 | 46.7    | 46.9 |
| $[(\text{CH}_3)_2\text{CO}]^+ \rightarrow \text{CH}_3 + [\text{CH}_3\text{CO}]^+$         | 22.6 <sup>a</sup> | 28.6 | 29.8    | 29.5 | 22.4 | 24.3    | 23.5 |
| $\text{C}_2\text{H}_4 \dots \text{F}_2 \rightarrow \text{C}_2\text{H}_4 + \text{F}_2$     | 1.1 <sup>a</sup>  | -0.3 | 0.0     | 0.0  | -0.5 | -0.1    | -0.1 |

a L.Goerigk and S.Grimme, J.Chem.Theory Comput. 6, 107 (2010).

Table S39: Benchmark Results for the BHPERI Subset of the GMTKN30-CHNOF Set. Barriers at 0 K (kcal/mol)

| Species                          | Ref.              | OM2  | OM2-D3T | ODM2 | OM3  | OM3-D3T | ODM3 |
|----------------------------------|-------------------|------|---------|------|------|---------|------|
| [cyclobutene]‡                   | 35.3 <sup>a</sup> | 41.9 | 41.7    | 43.1 | 42.2 | 41.9    | 43.6 |
| [cis-1,3,5-hexatriene]‡          | 30.9 <sup>a</sup> | 38.2 | 37.4    | 38.6 | 36.3 | 35.1    | 37.7 |
| [o-xylene]‡                      | 28.3 <sup>a</sup> | 43.3 | 43.3    | 43.0 | 42.1 | 42.0    | 42.7 |
| [1,3-pentadiene]‡                | 39.6 <sup>a</sup> | 34.3 | 33.8    | 35.4 | 33.7 | 32.8    | 35.6 |
| [1,3-cyclopentadiene]‡           | 28.2 <sup>a</sup> | 42.0 | 42.1    | 42.1 | 37.0 | 37.1    | 38.4 |
| [1,5-hexadiene]‡                 | 35.6 <sup>a</sup> | 41.2 | 40.1    | 40.6 | 42.9 | 41.3    | 42.9 |
| [1,3-butadiene + C2H4]‡          | 22.1 <sup>a</sup> | 28.5 | 25.4    | 26.1 | 28.6 | 24.2    | 26.5 |
| [1,3-cyclopentadiene + C2H4]‡    | 18.3 <sup>a</sup> | 27.7 | 24.5    | 24.3 | 28.4 | 23.8    | 25.2 |
| [1,3-cyclopentadiene]‡           | 9.8 <sup>a</sup>  | 29.4 | 25.0    | 24.6 | 30.5 | 24.5    | 26.0 |
| [cis-triscyclopropacyclohexane]‡ | 23.6 <sup>a</sup> | 38.2 | 38.3    | 38.2 | 38.4 | 38.6    | 38.2 |
| [N2O + C2H4]‡                    | 26.3 <sup>a</sup> | 23.0 | 21.4    | 25.4 | 15.6 | 13.3    | 21.2 |
| [N3H + C2H4]‡                    | 18.1 <sup>a</sup> | 22.3 | 20.4    | 20.5 | 12.5 | 9.8     | 14.0 |
| [N2CH2 + C2H4]‡                  | 12.2 <sup>a</sup> | 16.4 | 14.4    | 13.9 | 13.1 | 10.2    | 12.5 |
| [HCNO + C2H4]‡                   | 11.1 <sup>a</sup> | 11.6 | 9.9     | 12.4 | 10.9 | 8.4     | 10.3 |
| [HCNNH + C2H4]‡                  | 5.3 <sup>a</sup>  | 7.4  | 5.5     | 4.9  | 5.9  | 3.1     | 4.7  |
| [HCNCH2 + C2H4]‡                 | 4.0 <sup>a</sup>  | 8.3  | 6.2     | 6.4  | 10.3 | 7.4     | 9.5  |
| [H2COHN + C2H4]‡                 | 11.5 <sup>a</sup> | 18.8 | 16.7    | 17.2 | 19.5 | 16.4    | 16.5 |
| [H2CNHNNH + C2H4]‡               | 4.0 <sup>a</sup>  | 14.6 | 12.2    | 12.8 | 10.9 | 7.4     | 8.3  |
| [H2CNHCH2 + C2H4]‡               | -1.4 <sup>a</sup> | 11.1 | 8.7     | 7.2  | 11.2 | 7.9     | 7.1  |
| [1,3-cyclopentadiene + C2H4]‡    | 15.0 <sup>a</sup> | 28.8 | 25.5    | 25.3 | 29.2 | 24.5    | 26.0 |
| [furane + C2H4]‡                 | 19.8 <sup>a</sup> | 24.8 | 22.1    | 22.3 | 26.2 | 22.3    | 23.8 |
| [pyrrole + C2H4]‡                | 25.4 <sup>a</sup> | 34.6 | 31.6    | 30.5 | 34.3 | 30.0    | 32.7 |

a L.Goerigk and S.Grimme, J.Chem.Theory Comput. 6, 107 (2010).

Table S40: Benchmark Results for the BH76 Subset of the GMTKN30-CHNOF Set. Barriers at 0 K (kcal/mol)

| Species                             | Ref.               | OM2  | OM2-D3T | ODM2  | OM3   | OM3-D3T | ODM3  |
|-------------------------------------|--------------------|------|---------|-------|-------|---------|-------|
| H + N2O → OH + N2                   | 18.1 <sup>a</sup>  | -1.3 | -1.7    | -4.7  | -4.3  | -4.8    | -4.8  |
| H + N2O ← OH + N2                   | 83.2 <sup>a</sup>  | 68.5 | 67.9    | 65.7  | 68.8  | 67.9    | 65.8  |
| H + FH → HF + H                     | 42.2 <sup>a</sup>  | -1.2 | -1.4    | -9.1  | 1.7   | 1.5     | -5.3  |
| H + FH ← HF + H                     | 42.2 <sup>a</sup>  | -1.2 | -1.4    | -9.1  | 1.7   | 1.5     | -5.3  |
| H + CH3F → HF + CH3                 | 30.4 <sup>a</sup>  | 10.1 | 9.9     | 5.0   | 14.5  | 14.2    | 10.2  |
| H + CH3F ← HF + CH3                 | 57.0 <sup>a</sup>  | 30.1 | 29.7    | 35.3  | 39.5  | 38.9    | 36.6  |
| H + F2 → HF + F                     | 2.3 <sup>a</sup>   | 3.6  | 3.5     | 0.5   | 6.6   | 6.3     | 3.2   |
| H + F2 ← HF + F                     | 106.2 <sup>a</sup> | 99.9 | 99.7    | 105.5 | 106.6 | 106.4   | 108.0 |
| F- + CH3F → CH3F + F-               | -0.3 <sup>a</sup>  | 13.7 | 13.4    | 14.3  | 18.0  | 17.5    | 16.2  |
| F- + CH3F ← CH3F + F-               | -0.3 <sup>a</sup>  | 13.7 | 13.4    | 14.3  | 18.0  | 17.5    | 16.2  |
| F...CH3F → FCH3...F-                | 13.4 <sup>a</sup>  | 22.5 | 22.5    | 23.6  | 26.1  | 26.1    | 25.0  |
| F...CH3F ← FCH3...F-                | 13.4 <sup>a</sup>  | 22.5 | 22.5    | 23.6  | 26.1  | 26.1    | 25.0  |
| OH- + CH3F → CH3OH + F-             | -2.8 <sup>a</sup>  | 11.4 | 10.8    | 11.8  | 11.7  | 10.8    | 6.7   |
| OH- + CH3F ← CH3OH + F-             | 17.3 <sup>a</sup>  | 26.6 | 26.2    | 26.7  | 31.1  | 30.5    | 34.9  |
| OH...CH3F → HOCH3...F-              | 11.0 <sup>a</sup>  | 20.7 | 20.6    | 21.7  | 20.8  | 20.5    | 16.7  |
| OH...CH3F ← HOCH3...F-              | 47.2 <sup>a</sup>  | 57.2 | 57.2    | 61.0  | 63.4  | 63.4    | 66.0  |
| H + N2 → HN2                        | 14.7 <sup>a</sup>  | 2.5  | 2.2     | 2.4   | -7.0  | -7.4    | -5.7  |
| H + N2 ← HN2                        | 10.7 <sup>a</sup>  | 9.5  | 9.4     | 14.4  | 13.4  | 13.2    | 12.0  |
| H + CO → HCO                        | 3.2 <sup>a</sup>   | -1.8 | -2.1    | -2.7  | -0.8  | -1.3    | -1.7  |
| H + CO ← HCO                        | 22.7 <sup>a</sup>  | 31.5 | 31.4    | 36.8  | 36.0  | 35.7    | 41.7  |
| H + C2H4 → C2H5                     | 1.7 <sup>a</sup>   | 4.2  | 3.7     | 3.8   | 4.8   | 4.0     | 4.3   |
| H + C2H4 ← C2H5                     | 41.8 <sup>a</sup>  | 43.5 | 43.3    | 48.4  | 45.6  | 45.3    | 50.1  |
| CH3 + C2H4 → C3H7                   | 6.8 <sup>a</sup>   | 10.5 | 9.3     | 8.9   | 10.3  | 8.6     | 9.1   |
| CH3 + C2H4 ← C3H7                   | 33.0 <sup>a</sup>  | 35.0 | 34.9    | 36.2  | 37.7  | 37.6    | 38.5  |
| HNC → HCN                           | 48.2 <sup>a</sup>  | 89.8 | 89.8    | 93.0  | 76.9  | 76.9    | 82.6  |
| HNC ← HCN                           | 33.1 <sup>a</sup>  | 72.1 | 72.2    | 79.6  | 75.1  | 75.1    | 85.5  |
| OH + H2 → H2O + H                   | 5.1 <sup>a</sup>   | 5.2  | 4.9     | -0.0  | 2.7   | 2.2     | 3.1   |
| OH + H2 ← H2O + H                   | 21.2 <sup>a</sup>  | 12.6 | 12.4    | 12.5  | 12.2  | 11.9    | 12.0  |
| CH3 + H2 → CH4 + H                  | 12.1 <sup>a</sup>  | 5.2  | 4.7     | 1.2   | 0.7   | -0.1    | -1.0  |
| CH3 + H2 ← CH4 + H                  | 15.3 <sup>a</sup>  | 4.2  | 3.8     | 5.1   | 2.1   | 1.5     | 1.3   |
| OH + CH4 → H2O + CH3                | 6.7 <sup>a</sup>   | 2.9  | 2.3     | -0.2  | 3.7   | 3.0     | 5.2   |
| OH + CH4 ← H2O + CH3                | 19.6 <sup>a</sup>  | 11.3 | 10.7    | 8.4   | 11.9  | 11.0    | 11.8  |
| H + H2 → H2 + H                     | 9.6 <sup>a</sup>   | 1.3  | 1.0     | 1.4   | -5.1  | -5.6    | -6.8  |
| H + H2 ← H2 + H                     | 9.6 <sup>a</sup>   | 1.3  | 1.0     | 1.4   | -5.1  | -5.6    | -6.8  |
| OH + NH3 → H2O + NH2                | 3.2 <sup>a</sup>   | 8.9  | 8.4     | 8.2   | 4.3   | 3.5     | 4.1   |
| OH + NH3 ← H2O + NH2                | 12.7 <sup>a</sup>  | 17.3 | 16.7    | 16.4  | 15.3  | 14.5    | 15.6  |
| OH + C2H6 → H2O + C2H5              | 3.4 <sup>a</sup>   | 0.7  | 0.1     | -2.6  | 1.9   | 1.0     | 3.1   |
| OH + C2H6 ← H2O + C2H5              | 19.9 <sup>a</sup>  | 16.2 | 15.4    | 12.9  | 17.9  | 16.7    | 17.4  |
| F + H2 → HF + H                     | 1.8 <sup>a</sup>   | 4.8  | 4.6     | 3.6   | 7.0   | 6.8     | 5.9   |
| F + H2 ← HF + H                     | 33.4 <sup>a</sup>  | 31.0 | 30.9    | 39.5  | 38.2  | 38.0    | 36.7  |
| O + CH4 → OH + CH3                  | 13.7 <sup>a</sup>  | 2.5  | 2.2     | 1.2   | 2.4   | 1.9     | 3.8   |
| O + CH4 ← OH + CH3                  | 8.1 <sup>a</sup>   | 3.4  | 2.9     | 0.2   | 3.4   | 2.7     | 4.2   |
| H + OH → H2 + O                     | 10.7 <sup>a</sup>  | 1.2  | 1.0     | -0.3  | -0.1  | -0.5    | -0.2  |
| H + OH ← H2 + O                     | 13.1 <sup>a</sup>  | 1.4  | 1.2     | -3.2  | -2.6  | -2.9    | -3.0  |
| NH2 + CH3 → NH + CH4                | 8.0 <sup>a</sup>   | 7.8  | 7.2     | 7.3   | 2.9   | 1.9     | 3.8   |
| NH2 + CH3 ← NH + CH4                | 22.4 <sup>a</sup>  | 23.6 | 22.9    | 21.9  | 16.6  | 15.7    | 16.9  |
| NH2 + C2H5 → NHC2H6                 | 7.5 <sup>a</sup>   | 11.1 | 10.1    | 10.6  | 6.7   | 5.4     | 7.6   |
| NH2 + C2H5 ← NHC2H6                 | 18.3 <sup>a</sup>  | 19.8 | 19.0    | 18.2  | 12.5  | 11.5    | 13.0  |
| C2H6 + NH2 → C2H5 + NH3             | 10.4 <sup>a</sup>  | 14.7 | 13.9    | 13.6  | 9.5   | 8.2     | 10.6  |
| C2H6 + NH2 ← C2H5 + NH3             | 17.4 <sup>a</sup>  | 21.9 | 20.9    | 20.9  | 14.4  | 13.0    | 13.4  |
| NH2 + CH4 → NH3 + CH3               | 14.5 <sup>a</sup>  | 18.2 | 17.5    | 17.2  | 12.9  | 11.8    | 14.2  |
| NH2 + CH4 ← NH3 + CH3               | 17.8 <sup>a</sup>  | 18.3 | 17.6    | 17.6  | 10.0  | 8.9     | 9.3   |
| s-trans-cis-C5H8 → s-trans-cis-C5H8 | 38.4 <sup>a</sup>  | 34.7 | 34.2    | 35.7  | 33.8  | 33.0    | 35.7  |
| s-trans-cis-C5H8 ← s-trans-cis-C5H8 | 38.4 <sup>a</sup>  | 34.7 | 34.2    | 35.7  | 33.8  | 33.0    | 35.7  |

<sup>a</sup> L.Goerigk and S.Grimme, J.Chem.Theory Comput. 6, 107 (2010) ; Y.Zhao, B.J.Lynch, D.G.Truhlar, J.Phys.Chem.A 108, 2715 (2004) ; Y.Zhao, N.Gonzalez-Garcia, and D.G.Truhlar, J.Phys.Chem.A 109, 2012 (2005).

Table S41: Benchmark Results for the BH76RC Subset of the GMTKN30-CHNOF Set.  
Reaction Energies (kcal/mol)

| Species                 | Ref.                | OM2   | OM2-D3T | ODM2   | OM3    | OM3-D3T | ODM3   |
|-------------------------|---------------------|-------|---------|--------|--------|---------|--------|
| H + N2O → OH + N2       | -65.1 <sup>a</sup>  | -69.8 | -69.6   | -70.4  | -73.0  | -72.7   | -70.6  |
| H + CH3F → HF + CH3     | -26.6 <sup>a</sup>  | -20.0 | -19.8   | -30.3  | -25.0  | -24.7   | -26.4  |
| H + F2 → HF + F         | -103.9 <sup>a</sup> | -96.2 | -96.2   | -105.0 | -100.1 | -100.0  | -104.8 |
| OH- + CH3F → CH3OH + F- | -20.1 <sup>a</sup>  | -15.2 | -15.4   | -14.9  | -19.4  | -19.7   | -28.2  |
| OH...CH3F → HOCH3...F-  | -36.2 <sup>a</sup>  | -36.5 | -36.6   | -39.3  | -42.6  | -42.9   | -49.3  |
| H + N2 → HN2            | 4.0 <sup>a</sup>    | -7.1  | -7.3    | -12.0  | -20.3  | -20.6   | -17.7  |
| H + CO → HCO            | -19.5 <sup>a</sup>  | -33.3 | -33.4   | -39.5  | -36.7  | -37.0   | -43.4  |
| H + C2H4 → C2H5         | -40.0 <sup>a</sup>  | -39.3 | -39.6   | -44.6  | -40.8  | -41.2   | -45.8  |
| CH3 + C2H4 → C3H7       | -26.1 <sup>a</sup>  | -24.5 | -25.6   | -27.2  | -27.3  | -29.0   | -29.4  |
| HNC → HCN               | -15.1 <sup>a</sup>  | -17.7 | -17.6   | -13.3  | -1.9   | -1.8    | 3.0    |
| OH + H2 → H2O + H       | -16.1 <sup>a</sup>  | -7.4  | -7.5    | -12.5  | -9.6   | -9.7    | -9.0   |
| CH3 + H2 → CH4 + H      | -3.2 <sup>a</sup>   | 1.1   | 0.9     | -3.9   | -1.4   | -1.6    | -2.4   |
| OH + CH4 → H2O + CH3    | -12.9 <sup>a</sup>  | -8.5  | -8.4    | -8.6   | -8.2   | -8.0    | -6.6   |
| OH + NH3 → H2O + NH2    | -9.5 <sup>a</sup>   | -8.3  | -8.3    | -8.2   | -11.0  | -11.0   | -11.5  |
| OH + C2H6 → H2O + C2H5  | -16.5 <sup>a</sup>  | -15.5 | -15.3   | -15.5  | -16.0  | -15.7   | -14.3  |
| F + H2 → HF + H         | -31.6 <sup>a</sup>  | -26.2 | -26.2   | -35.8  | -31.2  | -31.2   | -30.8  |
| O + CH4 → OH + CH3      | 5.6 <sup>a</sup>    | -0.8  | -0.7    | 1.0    | -1.0   | -0.8    | -0.4   |
| H + OH → H2 + O         | -2.4 <sup>a</sup>   | -0.2  | -0.2    | 2.9    | 2.4    | 2.5     | 2.8    |
| NH2 + CH3 → NH + CH4    | -14.4 <sup>a</sup>  | -15.7 | -15.8   | -14.6  | -13.7  | -13.8   | -13.1  |
| NH2 + C2H5 → NHC2H6     | -10.8 <sup>a</sup>  | -8.7  | -8.9    | -7.6   | -5.9   | -6.1    | -5.4   |
| C2H6 + NH2 → C2H5 + NH3 | -7.0 <sup>a</sup>   | -7.2  | -7.0    | -7.4   | -4.9   | -4.7    | -2.8   |
| NH2 + CH4 → NH3 + CH3   | -3.3 <sup>a</sup>   | -0.1  | -0.1    | -0.4   | 2.9    | 2.9     | 4.9    |

<sup>a</sup> L.Goerigk and S.Grimme, J.Chem.Theory Comput. 6, 107 (2010) ; Y.Zhao, B.J.Lynch, D.G.Truhlar, J.Phys.Chem.A 108, 2715 (2004) ; Y.Zhao, N.Gonzalez-Garcia, and D.G.Truhlar, J.Phys.Chem.A 109, 2012 (2005).

Table S42: Benchmark Results for the RSE43 Subset of the GMTKN30-CHNOF Set. Reaction Energies (kcal/mol)

| Species       | Ref.               | OM2   | OM2-D3T | ODM2  | OM3   | OM3-D3T | ODM3  |
|---------------|--------------------|-------|---------|-------|-------|---------|-------|
| (C6H5)CH2     | -15.2 <sup>a</sup> | -8.9  | -8.7    | -9.1  | -8.6  | -8.4    | -8.5  |
| CH2CCN        | 1.9 <sup>a</sup>   | 1.8   | 2.0     | 1.8   | -1.0  | -0.6    | 1.8   |
| CH2CF         | 6.8 <sup>a</sup>   | -1.3  | -1.2    | -0.9  | -4.6  | -4.5    | -1.5  |
| CH3CF2CH2     | 0.1 <sup>a</sup>   | -3.4  | -3.2    | -3.1  | -2.6  | -2.4    | -2.7  |
| CF3CH2        | 1.4 <sup>a</sup>   | -2.3  | -2.2    | -2.0  | -1.3  | -1.1    | -1.4  |
| CH2FCH2       | -1.3 <sup>a</sup>  | -4.1  | -4.0    | -3.8  | -3.6  | -3.5    | -3.9  |
| HOCH2CH2      | -1.8 <sup>a</sup>  | -6.3  | -6.2    | -6.3  | -7.0  | -6.8    | -6.9  |
| CH2CHCH2      | -17.5 <sup>a</sup> | -15.1 | -15.0   | -15.4 | -14.9 | -14.8   | -14.9 |
| CH2CHO        | -10.0 <sup>a</sup> | -8.3  | -8.2    | -8.7  | -6.9  | -6.8    | -6.9  |
| CH2CN         | -8.6 <sup>a</sup>  | -7.3  | -7.3    | -7.3  | -8.2  | -8.1    | -6.7  |
| CH2CONH2      | -6.3 <sup>a</sup>  | -5.3  | -5.1    | -5.6  | -4.5  | -4.3    | -4.0  |
| CH3NHCOCH2    | -6.3 <sup>a</sup>  | -5.2  | -5.0    | -5.5  | -4.3  | -4.1    | -3.9  |
| CH2COOCH3     | -6.6 <sup>a</sup>  | -5.0  | -4.9    | -5.6  | -4.5  | -4.4    | -4.3  |
| CH2COOH       | -6.4 <sup>a</sup>  | -4.9  | -4.8    | -5.4  | -4.5  | -4.3    | -4.3  |
| (CH2CHCH2)CH2 | -3.0 <sup>a</sup>  | -6.1  | -5.9    | -6.1  | -6.6  | -6.3    | -6.4  |
| CH2F          | -3.9 <sup>a</sup>  | -6.7  | -6.7    | -6.6  | -9.2  | -9.2    | -7.8  |
| CH2NH2        | -12.0 <sup>a</sup> | -20.0 | -19.9   | -18.4 | -22.8 | -22.7   | -19.1 |
| CH2NH+3       | 4.7 <sup>a</sup>   | -3.7  | -3.6    | -3.5  | -4.9  | -4.7    | -3.5  |
| CH3NHCH2      | -12.6 <sup>a</sup> | -18.7 | -18.6   | -16.8 | -22.3 | -22.1   | -19.1 |
| CH2NHCHO      | -11.1 <sup>a</sup> | -16.2 | -16.1   | -14.9 | -17.2 | -17.1   | -13.9 |
| CH2NHOH       | -8.6 <sup>a</sup>  | -15.4 | -15.3   | -13.2 | -17.2 | -17.0   | -13.5 |
| (CH3)2NCH2    | -12.8 <sup>a</sup> | -17.6 | -17.3   | -15.3 | -21.8 | -21.4   | -18.5 |
| CH2NO2        | -3.3 <sup>a</sup>  | -6.3  | -6.2    | -7.3  | -4.7  | -4.6    | -3.2  |
| CF3OCH2       | -3.9 <sup>a</sup>  | -10.0 | -9.9    | -9.5  | -10.7 | -10.5   | -8.7  |
| CH3OCH2       | -2.7 <sup>a</sup>  | -8.1  | -8.0    | -7.5  | -8.6  | -8.4    | -7.5  |
| CH2OCHO       | -5.9 <sup>a</sup>  | -10.5 | -10.4   | -9.7  | -10.4 | -10.3   | -8.9  |
| CH3COOCH2     | -6.2 <sup>a</sup>  | -9.9  | -9.7    | -8.9  | -10.2 | -10.0   | -8.5  |
| CH2OH         | -4.2 <sup>a</sup>  | -9.7  | -9.7    | -9.3  | -10.7 | -10.7   | -9.9  |
| H2NCHCN       | -22.5 <sup>a</sup> | -27.1 | -26.9   | -25.0 | -28.6 | -28.4   | -24.6 |
| H2NCHCONH2    | -24.1 <sup>a</sup> | -29.7 | -29.4   | -27.6 | -29.7 | -29.4   | -25.8 |
| H2NCHCOOH     | -25.4 <sup>a</sup> | -31.7 | -31.5   | -30.2 | -33.1 | -32.8   | -29.5 |
| H2CCCH        | -13.1 <sup>a</sup> | -11.0 | -11.0   | -11.3 | -11.2 | -11.1   | -11.1 |
| (CH3)3C       | -6.4 <sup>a</sup>  | -17.5 | -17.1   | -16.4 | -19.4 | -18.8   | -18.1 |
| (CH3)3CCCH2   | -2.3 <sup>a</sup>  | -6.4  | -6.1    | -6.3  | -6.7  | -6.3    | -6.5  |

<sup>a</sup> L.Goerigk and S.Grimme, J.Chem.Theory Comput. 6, 107 (2010) ; F.Neese, T.Schwabe, S.Kossmann, B.Schirmer, and S.Grimme, J.Chem.Theory Comput. 5, 3060 (2009).

Table S43: Benchmark Results for the O3ADD6 Subset of the GMTKN30-CHNOF Set.  
Relative Energies at 0 K (kcal/mol)

| Species     | Ref.               | OM2   | OM2-D3T | ODM2  | OM3   | OM3-D3T | ODM3  |
|-------------|--------------------|-------|---------|-------|-------|---------|-------|
| o3_c2h2_vdw | -1.9 <sup>a</sup>  | -1.3  | -2.0    | -2.0  | -1.1  | -2.0    | -1.9  |
| o3_c2h2_ts  | 7.7 <sup>a</sup>   | -3.8  | -4.8    | -2.8  | 3.6   | 1.9     | 3.1   |
| o3_c2h2_add | -63.8 <sup>a</sup> | -35.9 | -36.9   | -81.3 | -19.2 | -20.6   | -78.9 |
| o3_c2h4_vdw | -1.9 <sup>a</sup>  | -1.6  | -2.5    | -2.5  | -1.0  | -2.2    | -2.1  |
| o3_c2h4_ts  | 3.4 <sup>a</sup>   | -5.0  | -6.4    | -4.9  | 2.0   | -0.0    | 0.7   |
| o3_c2h4_add | -57.1 <sup>a</sup> | -81.9 | -82.9   | -83.5 | -71.1 | -72.7   | -77.2 |

<sup>a</sup> L.Goerigk and S.Grimme, J.Chem.Theory Comput. 6, 107 (2010) ; Y.Zhao, O.Tishchenko, J.R.Gour, W.Li, J.J.Lutz, P.Piecuch, and D.J.Truhlar, J.Phys.Chem.A 113, 5786 (2009).

Table S44: Benchmark Results for the G2RC Subset of the GMTKN30-CHNOF Set. Reaction Energies (kcal/mol)

| Species                                                                                       | Ref.                | OM2    | OM2-D3T | ODM2   | OM3    | OM3-D3T | ODM3   |
|-----------------------------------------------------------------------------------------------|---------------------|--------|---------|--------|--------|---------|--------|
| CO <sub>2</sub> + H <sub>2</sub> → HCOOH                                                      | -2.0 <sup>a</sup>   | -5.5   | -5.9    | -15.1  | -1.3   | -2.0    | -6.2   |
| CH <sub>3</sub> CHO → CO + CH <sub>4</sub>                                                    | -2.5 <sup>a</sup>   | 6.7    | 7.5     | 10.9   | 10.2   | 11.4    | 16.9   |
| CO + H <sub>2</sub> O → CO <sub>2</sub> + H <sub>2</sub>                                      | -7.0 <sup>a</sup>   | -5.0   | -5.1    | -0.3   | -8.5   | -8.6    | -13.1  |
| CH <sub>3</sub> CN + H <sub>2</sub> O → CH <sub>3</sub> CONH <sub>2</sub>                     | -20.1 <sup>a</sup>  | -11.7  | -12.7   | -18.0  | -17.8  | -19.3   | -21.0  |
| C <sub>2</sub> H <sub>2</sub> + HF → CH <sub>2</sub> CHF                                      | -25.4 <sup>a</sup>  | -25.0  | -25.6   | -21.2  | -22.8  | -23.7   | -25.8  |
| H <sub>2</sub> CO + H <sub>2</sub> → CH <sub>3</sub> OH                                       | -29.2 <sup>a</sup>  | -15.7  | -16.1   | -27.4  | -16.9  | -17.5   | -23.3  |
| C <sub>2</sub> H <sub>2</sub> + C <sub>2</sub> H <sub>4</sub> → C <sub>4</sub> H <sub>8</sub> | -32.7 <sup>a</sup>  | -26.5  | -27.9   | -30.7  | -28.7  | -30.8   | -31.8  |
| N <sub>2</sub> + 3H <sub>2</sub> → 2NH <sub>3</sub>                                           | -38.9 <sup>a</sup>  | -7.2   | -7.7    | -44.2  | -36.2  | -37.0   | -46.5  |
| C <sub>2</sub> H <sub>2</sub> + H <sub>2</sub> → C <sub>2</sub> H <sub>4</sub>                | -48.4 <sup>a</sup>  | -40.8  | -41.3   | -50.8  | -42.4  | -43.3   | -48.7  |
| CO + 3H <sub>2</sub> → H <sub>2</sub> O + CH <sub>4</sub>                                     | -64.8 <sup>a</sup>  | -52.3  | -52.8   | -82.5  | -58.6  | -59.5   | -78.0  |
| OF <sub>2</sub> + H <sub>2</sub> → F <sub>2</sub> + H <sub>2</sub> O                          | -68.7 <sup>a</sup>  | -59.0  | -58.9   | -70.7  | -64.9  | -64.9   | -68.3  |
| N <sub>2</sub> O + H <sub>2</sub> → N <sub>2</sub> + H <sub>2</sub> O                         | -80.7 <sup>a</sup>  | -77.6  | -77.5   | -83.1  | -81.2  | -81.0   | -79.4  |
| C <sub>2</sub> H <sub>4</sub> + CH <sub>2</sub> → C <sub>3</sub> H <sub>6</sub>               | -109.1 <sup>a</sup> | -107.5 | -108.4  | -108.1 | -105.7 | -107.1  | -105.9 |
| H <sub>2</sub> + F <sub>2</sub> → 2HF                                                         | -134.3 <sup>a</sup> | -123.9 | -123.9  | -141.7 | -132.6 | -132.6  | -137.2 |
| 3C <sub>2</sub> H <sub>2</sub> → C <sub>6</sub> H <sub>6</sub>                                | -151.6 <sup>a</sup> | -148.1 | -151.2  | -153.8 | -149.4 | -154.3  | -154.2 |

<sup>a</sup> L.Goerigk and S.Grimme, J.Chem.Theory Comput. 6, 107 (2010) ; L.A.Curtiss, K.Raghavachari, P.C.Redfern, and J.A.Pople, J.Chem.Phys. 106, 1063 (1997).



Table S45: Benchmark Results for the ISO34 Subset of the GMTKN30-CHNOF Set. Relative Energies at 0 K (kcal/mol)

| Species                                 | Ref.              | OM2   | OM2-D3T | ODM2 | OM3   | OM3-D3T | ODM3  |
|-----------------------------------------|-------------------|-------|---------|------|-------|---------|-------|
| propyne → allene                        | 1.6 <sup>a</sup>  | -0.2  | -0.3    | 0.1  | -0.2  | -0.3    | 0.2   |
| propyne → cyclopropene                  | 21.9 <sup>a</sup> | 22.5  | 22.5    | 22.6 | 20.8  | 20.6    | 20.9  |
| propylene → cyclopropane                | 7.2 <sup>a</sup>  | 4.8   | 4.8     | 4.6  | 5.0   | 5.0     | 6.1   |
| trans-2-butene → cis-2-butene           | 1.0 <sup>a</sup>  | 2.1   | 2.0     | 2.6  | 2.1   | 1.9     | 2.7   |
| isobutylene → trans-2-butene            | 0.9 <sup>a</sup>  | 1.4   | 1.7     | 1.0  | 0.6   | 1.0     | 0.2   |
| trans-2-butene → 1-butene               | 2.6 <sup>a</sup>  | 3.8   | 3.7     | 3.8  | 4.4   | 4.2     | 4.3   |
| 1,3-butadiene → cyclobutene             | 11.2 <sup>a</sup> | 12.0  | 12.0    | 10.6 | 10.5  | 10.4    | 9.8   |
| cyclopentene → ethenylcyclopropane      | 22.9 <sup>a</sup> | 22.1  | 22.6    | 23.0 | 23.5  | 24.2    | 24.9  |
| piperylene → 1,4-pentadiene             | 6.9 <sup>a</sup>  | 5.5   | 5.3     | 5.6  | 5.6   | 5.5     | 5.6   |
| neopentane → pentane                    | 3.6 <sup>a</sup>  | 7.0   | 7.8     | 6.9  | 4.1   | 5.2     | 4.4   |
| tetramethylbutane → octane              | 1.9 <sup>a</sup>  | 8.0   | 10.9    | 7.7  | 1.0   | 5.1     | 1.5   |
| toluene → norbornadiene                 | 47.0 <sup>a</sup> | 44.2  | 43.7    | 43.2 | 44.1  | 43.4    | 42.6  |
| ethenylbenzene → cyclooctatetraene      | 36.0 <sup>a</sup> | 46.0  | 45.7    | 45.7 | 42.6  | 42.2    | 42.8  |
| acetonitrile → isocyanomethane          | 24.2 <sup>a</sup> | 22.2  | 22.2    | 21.8 | 12.6  | 12.5    | 7.4   |
| ethanamine → dimethylamine              | 7.3 <sup>a</sup>  | 3.2   | 3.2     | 5.9  | 10.0  | 10.0    | 9.4   |
| N-methylmethanimine → aziridine         | 10.8 <sup>a</sup> | 22.7  | 22.8    | 20.3 | 20.3  | 20.3    | 23.5  |
| ethylenediamine → 1,2-dimethylhydrazine | 27.0 <sup>a</sup> | 15.5  | 15.8    | 22.4 | 27.0  | 27.4    | 26.8  |
| pyrrolidine → cyclobutanamine           | 11.2 <sup>a</sup> | 12.2  | 12.4    | 10.5 | 6.7   | 6.9     | 7.6   |
| pyrimidine → pyrazine                   | 4.6 <sup>a</sup>  | 0.2   | 0.2     | 1.8  | -0.8  | -0.8    | 4.1   |
| pyrazine → pyridazine                   | 20.2 <sup>a</sup> | 7.4   | 7.4     | 8.4  | 9.1   | 9.0     | 7.3   |
| 2-methylpyridine → 4-methylpyridine     | 0.9 <sup>a</sup>  | -1.0  | -1.1    | 0.3  | -0.1  | -0.1    | -0.1  |
| aniline → 2-methylpyridine              | 3.2 <sup>a</sup>  | -2.3  | -2.1    | 1.8  | -1.6  | -1.4    | 0.7   |
| cyclohexanamine → 2-methylpiperidine    | 5.3 <sup>a</sup>  | 3.8   | 3.9     | 7.1  | 7.6   | 7.7     | 7.5   |
| ethanol → methoxymethane                | 12.5 <sup>a</sup> | 10.7  | 10.8    | 11.3 | 14.1  | 14.2    | 12.4  |
| acetaldehyde → oxirane                  | 26.5 <sup>a</sup> | 30.3  | 30.4    | 32.5 | 36.9  | 37.1    | 40.8  |
| acetic acid → methyl formate            | 18.2 <sup>a</sup> | 21.6  | 21.7    | 20.8 | 24.3  | 24.3    | 21.7  |
| ethylene glycol → methyl peroxide       | 64.2 <sup>a</sup> | 58.0  | 58.4    | 59.7 | 62.5  | 63.2    | 61.8  |
| acetone → oxetane                       | 31.2 <sup>a</sup> | 41.4  | 41.4    | 39.0 | 44.4  | 44.4    | 42.1  |
| oxolane → ethoxyethene                  | 11.9 <sup>a</sup> | 19.1  | 19.3    | 19.9 | 19.3  | 19.7    | 19.9  |
| N-methylacetamide → dimethylformamide   | 9.5 <sup>a</sup>  | 8.9   | 8.7     | 14.0 | 13.2  | 12.9    | 12.1  |
| oxolan-2-one → ethenyl acetate          | 14.1 <sup>a</sup> | 16.8  | 17.4    | 18.4 | 16.7  | 17.6    | 17.5  |
| oxan-2-one → acetylacetone              | 7.1 <sup>a</sup>  | -11.5 | -11.2   | -9.6 | -15.8 | -15.3   | -12.4 |
| hexanoic acid → methyl pivalate         | 5.6 <sup>a</sup>  | 1.1   | 0.6     | 1.1  | 7.7   | 7.0     | 6.1   |
| 2-methylphenol → phenylmethanol         | 7.3 <sup>a</sup>  | 5.2   | 5.3     | 4.7  | 5.1   | 5.3     | 3.9   |

<sup>a</sup> L.Goerigk and S.Grimme, J.Chem.Theory Comput. 6, 107 (2010) ; S.Grimme, M.Steinmetz, and M.Korth, J.Org.Chem. 72, 2118 (2007) ; M.P.Repasky, J.Chandrasekhar, and W.L.Jorgensen, J.Comput.Chem. 23, 1601 (2002) ; K.W.Sattelmeyer, J.Tirado-Rives, and W.L.Jorgensen, J.Phys.Chem.A 110, 13551 (2006).

Table S46: Benchmark Results for the ISOL22 Subset of the GMTKN30-CHNOF Set. Relative Energies at 0 K (kcal/mol)

| Species | Ref.              | OM2  | OM2-D3T | ODM2 | OM3  | OM3-D3T | ODM3 |
|---------|-------------------|------|---------|------|------|---------|------|
| i2p     | 40.6 <sup>a</sup> | 32.6 | 38.0    | 37.9 | 30.5 | 37.9    | 36.0 |
| i3p     | 11.7 <sup>a</sup> | 10.2 | 10.0    | 10.6 | 1.9  | 1.7     | 4.6  |
| i5p     | 34.9 <sup>a</sup> | 33.1 | 34.7    | 35.6 | 37.2 | 39.7    | 39.0 |
| i6p     | 25.9 <sup>a</sup> | 8.7  | 8.6     | 4.7  | -1.9 | -1.8    | 1.0  |
| i7p     | 18.8 <sup>a</sup> | 17.5 | 20.3    | 19.9 | 16.0 | 19.9    | 18.7 |
| i8p     | 18.3 <sup>a</sup> | 26.9 | 22.2    | 21.0 | 19.9 | 14.0    | 16.7 |
| i9p     | 22.3 <sup>a</sup> | 22.3 | 23.6    | 22.7 | 19.3 | 21.1    | 20.2 |
| i10p    | 7.9 <sup>a</sup>  | 5.6  | 6.4     | 4.7  | 6.2  | 7.5     | 4.1  |
| i11p    | 38.1 <sup>a</sup> | 64.6 | 64.8    | 66.6 | 67.6 | 67.8    | 69.9 |
| i12p    | 1.0 <sup>a</sup>  | 2.5  | 2.5     | 1.6  | 3.2  | 3.1     | 0.4  |
| i13p    | 35.1 <sup>a</sup> | 27.6 | 28.0    | 34.2 | 37.8 | 38.4    | 37.5 |
| i14p    | 5.2 <sup>a</sup>  | 7.6  | 8.4     | 8.2  | 9.2  | 10.3    | 5.7  |
| i15p    | 3.9 <sup>a</sup>  | 9.4  | 10.4    | 15.7 | 9.5  | 11.0    | 15.8 |
| i16p    | 22.6 <sup>a</sup> | 17.9 | 17.7    | 18.5 | 19.7 | 19.6    | 19.0 |
| i17p    | 11.1 <sup>a</sup> | 10.3 | 11.0    | 11.5 | 10.2 | 11.2    | 11.2 |
| i18p    | 26.1 <sup>a</sup> | 29.9 | 31.5    | 32.8 | 28.0 | 30.1    | 29.9 |
| i20p    | 4.5 <sup>a</sup>  | 3.2  | 2.8     | 3.7  | 4.7  | 4.3     | 3.3  |
| i22p    | 0.5 <sup>a</sup>  | -0.4 | 2.7     | 3.7  | 0.4  | 4.5     | 4.6  |

<sup>a</sup> L.Goerigk and S.Grimme, J.Chem.Theory Comput. 7, 291 (2011) ; R.Huenerbein, B.Schirmer, J.Moellmann, and S.Grimme, Phys.Chem.Chem.Phys. 12, 6940 (2010).

Table S47: Benchmark Results for the DC9 Subset of the GMTKN30-CHNOF Set. Relative Energies at 0 K (kcal/mol)

| Species                                                                                                         | Ref.               | OM2    | OM2-D3T | ODM2   | OM3    | OM3-D3T | ODM3   |
|-----------------------------------------------------------------------------------------------------------------|--------------------|--------|---------|--------|--------|---------|--------|
| 2-pyridone → 2-hydroxypyridine                                                                                  | -1.0 <sup>a</sup>  | -1.7   | -1.6    | -0.8   | 1.0    | 1.2     | 3.3    |
| [C20]cage → [C20]bowl                                                                                           | -13.3 <sup>a</sup> | -106.9 | -104.2  | -115.0 | -106.9 | -102.2  | -104.9 |
| hepta-1,2,3,5,6-hexaene → hepta-1,3,5-triyne                                                                    | -14.3 <sup>a</sup> | -14.3  | -14.2   | -15.0  | -14.1  | -14.1   | -15.5  |
| 2 tetramethyl-ethen → octamethylcylobutane                                                                      | -19.2 <sup>a</sup> | -14.9  | -22.4   | -22.1  | -7.5   | -17.6   | -15.0  |
| (CH) <sub>12</sub> isomerization                                                                                | -19.5 <sup>a</sup> | -34.2  | -35.3   | -35.0  | -32.4  | -34.2   | -31.8  |
| carbo-[3]-oxacarbon isomerization                                                                               | -26.9 <sup>a</sup> | -80.1  | -80.5   | -83.2  | -66.8  | -67.3   | -65.5  |
| N <sub>2</sub> CH <sub>2</sub> + C <sub>2</sub> H <sub>4</sub> → (CH <sub>2</sub> ) <sub>3</sub> N <sub>2</sub> | -38.1 <sup>a</sup> | -46.7  | -48.4   | -49.0  | -50.5  | -53.2   | -50.0  |

a L.Goerigk and S.Grimme, J.Chem.Theory Comput. 6, 107 (2010).

Table S48: Benchmark Results for the DARC Subset of the GMTKN30-CHNOF Set. Relative Energies at 0 K (kcal/mol)

| Species                                      | Ref.               | OM2   | OM2-D3T | ODM2  | OM3   | OM3-D3T | ODM3  |
|----------------------------------------------|--------------------|-------|---------|-------|-------|---------|-------|
| ethene + butadiene                           | -43.8 <sup>a</sup> | -40.0 | -42.6   | -44.0 | -43.5 | -47.3   | -46.5 |
| ethyne + butadiene                           | -59.3 <sup>a</sup> | -57.1 | -59.2   | -60.0 | -60.2 | -63.4   | -62.4 |
| ethene + cyclopentadiene                     | -30.0 <sup>a</sup> | -26.3 | -29.2   | -31.1 | -25.9 | -30.1   | -29.9 |
| ethyne + cyclopentadiene                     | -33.1 <sup>a</sup> | -36.0 | -38.4   | -39.9 | -35.3 | -38.9   | -38.9 |
| ethene + cyclohexadiene                      | -36.5 <sup>a</sup> | -34.6 | -37.9   | -39.1 | -34.8 | -39.5   | -38.8 |
| ethyne + cyclohexadiene                      | -48.2 <sup>a</sup> | -51.3 | -54.1   | -54.9 | -50.3 | -54.5   | -54.2 |
| furane + maleine (endo-product)              | -14.4 <sup>a</sup> | -31.6 | -35.6   | -35.8 | -26.7 | -32.3   | -31.8 |
| furane + maleine (exo-product)               | -16.2 <sup>a</sup> | -32.5 | -36.2   | -36.8 | -27.6 | -32.8   | -32.9 |
| furane + maleinimide (endo-product)          | -17.2 <sup>a</sup> | -32.0 | -36.0   | -36.7 | -28.6 | -34.4   | -33.6 |
| furane + maleinimide (exo-product)           | -19.2 <sup>a</sup> | -33.4 | -37.2   | -38.2 | -30.1 | -35.5   | -35.0 |
| cyclopentadiene + maleine (endo-product)     | -31.6 <sup>a</sup> | -37.9 | -42.3   | -42.9 | -34.6 | -40.7   | -39.4 |
| cyclopentadiene + maleine (exo-product)      | -32.1 <sup>a</sup> | -38.9 | -43.1   | -43.9 | -35.6 | -41.5   | -40.6 |
| cyclopentadiene + maleinimide (endo-product) | -34.1 <sup>a</sup> | -37.9 | -42.4   | -43.5 | -36.2 | -42.5   | -40.9 |
| cyclopentadiene + maleinimide (exo-product)  | -34.4 <sup>a</sup> | -38.9 | -43.3   | -44.5 | -37.2 | -43.3   | -42.1 |

<sup>a</sup> L.Goerigk and S.Grimme, J.Chem.Theory Comput. 6, 107 (2010) ; E.R.Johnson, P.Mori-Sanchez, A.J.Cohen, and W.J.Yang, J.Chem.Phys. 129, 204112 (2008).

Table S49: Benchmark Results for the BSR36 Subset of the GMTKN30-CHNOF Set. Reaction Energies (kcal/mol)

| Species                                                                                       | Ref.              | OM2  | OM2-D3T | ODM2 | OM3  | OM3-D3T | ODM3 |
|-----------------------------------------------------------------------------------------------|-------------------|------|---------|------|------|---------|------|
| The OM $x$ and OM $x$ -D3T energies are uncorrected atomization enthalpies at 298 K           |                   |      |         |      |      |         |      |
| 2,3-dimethylbutane + 4 CH <sub>4</sub> → 5 C <sub>2</sub> H <sub>6</sub>                      | 9.8 <sup>a</sup>  | 13.4 | 15.9    | 14.8 | 9.0  | 12.4    | 11.4 |
| 2-methylpentane + 4 CH <sub>4</sub> → 5 C <sub>2</sub> H <sub>6</sub>                         | 9.7 <sup>a</sup>  | 12.6 | 14.6    | 14.3 | 9.4  | 12.0    | 11.8 |
| 2,2-dimethylbutane + 4 CH <sub>4</sub> → 5 C <sub>2</sub> H <sub>6</sub>                      | 11.4 <sup>a</sup> | 16.2 | 18.9    | 17.7 | 10.7 | 14.3    | 13.2 |
| 3-methylpentane + 4 CH <sub>4</sub> → 5 C <sub>2</sub> H <sub>6</sub>                         | 9.0 <sup>a</sup>  | 11.6 | 13.8    | 13.1 | 8.2  | 11.1    | 10.6 |
| hexane + 4 CH <sub>4</sub> → 5 C <sub>2</sub> H <sub>6</sub>                                  | 8.7 <sup>a</sup>  | 11.0 | 12.5    | 12.6 | 8.9  | 10.8    | 11.1 |
| heptane + 5 CH <sub>4</sub> → 6 C <sub>2</sub> H <sub>6</sub>                                 | 10.9 <sup>a</sup> | 13.7 | 15.6    | 15.8 | 11.1 | 13.5    | 14.0 |
| 2,4-dimethylpentane + 5 CH <sub>4</sub> → 6 C <sub>2</sub> H <sub>6</sub>                     | 13.1 <sup>a</sup> | 16.9 | 19.9    | 19.1 | 11.9 | 15.8    | 15.2 |
| 2-methylhexane + 5 CH <sub>4</sub> → 6 C <sub>2</sub> H <sub>6</sub>                          | 11.9 <sup>a</sup> | 15.4 | 17.8    | 17.5 | 11.6 | 14.7    | 14.7 |
| 2,2-dimethylpentane + 5 CH <sub>4</sub> → 6 C <sub>2</sub> H <sub>6</sub>                     | 13.5 <sup>a</sup> | 19.1 | 22.2    | 21.0 | 13.0 | 17.2    | 16.2 |
| 2,3-dimethylpentane + 5 CH <sub>4</sub> → 6 C <sub>2</sub> H <sub>6</sub>                     | 11.4 <sup>a</sup> | 15.4 | 18.6    | 17.3 | 10.4 | 14.7    | 13.4 |
| 2,2,3-trimethylbutane + 5 CH <sub>4</sub> → 6 C <sub>2</sub> H <sub>6</sub>                   | 13.0 <sup>a</sup> | 19.5 | 23.3    | 21.4 | 12.1 | 17.3    | 15.4 |
| 3,3-dimethylpentane + 5 CH <sub>4</sub> → 6 C <sub>2</sub> H <sub>6</sub>                     | 12.8 <sup>a</sup> | 17.3 | 21.0    | 19.3 | 10.8 | 15.7    | 14.0 |
| 3-methylhexane + 5 CH <sub>4</sub> → 6 C <sub>2</sub> H <sub>6</sub>                          | 11.2 <sup>a</sup> | 14.5 | 17.1    | 16.5 | 10.6 | 14.0    | 13.6 |
| 3-ethylpentane + 5 CH <sub>4</sub> → 6 C <sub>2</sub> H <sub>6</sub>                          | 10.2 <sup>a</sup> | 13.9 | 16.7    | 16.0 | 9.9  | 13.6    | 13.0 |
| tetramethylbutane + 6 CH <sub>4</sub> → 7 C <sub>2</sub> H <sub>6</sub>                       | 15.1 <sup>a</sup> | 24.7 | 30.0    | 27.1 | 13.9 | 21.1    | 18.1 |
| cyclopentane + 5 CH <sub>4</sub> → 5 C <sub>2</sub> H <sub>6</sub>                            | 2.4 <sup>a</sup>  | 11.2 | 11.5    | 10.5 | 7.4  | 7.8     | 7.0  |
| cyclohexane + 6 CH <sub>4</sub> → 6 C <sub>2</sub> H <sub>6</sub>                             | 10.7 <sup>a</sup> | 16.9 | 18.2    | 17.2 | 13.0 | 14.7    | 14.0 |
| methylcyclopentane + 6 CH <sub>4</sub> → 6 C <sub>2</sub> H <sub>6</sub>                      | 6.3 <sup>a</sup>  | 16.4 | 17.4    | 16.3 | 11.5 | 12.8    | 12.0 |
| methylcyclohexane + 7 CH <sub>4</sub> → 7 C <sub>2</sub> H <sub>6</sub>                       | 14.9 <sup>a</sup> | 22.3 | 24.4    | 23.3 | 17.0 | 19.7    | 19.0 |
| 1,1-dimethylcyclopentane + 7 CH <sub>4</sub> → 7 C <sub>2</sub> H <sub>6</sub>                | 10.7 <sup>a</sup> | 23.3 | 25.5    | 23.5 | 15.6 | 18.6    | 16.9 |
| cis-1,3-dimethylcyclopentane + 7 CH <sub>4</sub> → 7 C <sub>2</sub> H <sub>6</sub>            | 10.1 <sup>a</sup> | 21.7 | 23.4    | 22.2 | 15.8 | 18.0    | 17.1 |
| cis-1,2-dimethylcyclopentane + 7 CH <sub>4</sub> → 7 C <sub>2</sub> H <sub>6</sub>            | 9.1 <sup>a</sup>  | 20.0 | 22.2    | 20.2 | 13.4 | 16.2    | 14.5 |
| trans-1,2-dimethylcyclopentane + 7 CH <sub>4</sub> → 7 C <sub>2</sub> H <sub>6</sub>          | 10.5 <sup>a</sup> | 21.5 | 23.4    | 22.1 | 15.3 | 17.8    | 16.8 |
| trans-1,3-dimethylcyclopentane + 7 CH <sub>4</sub> → 7 C <sub>2</sub> H <sub>6</sub>          | 9.8 <sup>a</sup>  | 22.0 | 23.8    | 22.5 | 16.0 | 18.3    | 17.4 |
| spiro[4.5]decane + 12 CH <sub>4</sub> → 11 C <sub>2</sub> H <sub>6</sub>                      | 19.3 <sup>a</sup> | 37.0 | 40.9    | 37.5 | 25.6 | 30.7    | 27.9 |
| bicyclo[3.3.2]decane + 12 CH <sub>4</sub> → 11 C <sub>2</sub> H <sub>6</sub>                  | 9.7 <sup>a</sup>  | 15.0 | 19.5    | 15.3 | 8.2  | 14.2    | 9.3  |
| decahydroazulene + 12 CH <sub>4</sub> → 11 C <sub>2</sub> H <sub>6</sub>                      | 15.2 <sup>a</sup> | 29.7 | 33.2    | 30.8 | 21.4 | 25.9    | 23.8 |
| trans-decalin + 12 CH <sub>4</sub> → 11 C <sub>2</sub> H <sub>6</sub>                         | 26.1 <sup>a</sup> | 39.4 | 43.0    | 41.0 | 29.9 | 34.8    | 33.5 |
| cis-decalin + 12 CH <sub>4</sub> → 11 C <sub>2</sub> H <sub>6</sub>                           | 23.4 <sup>a</sup> | 36.8 | 40.9    | 37.9 | 27.0 | 32.4    | 29.9 |
| dicyclohexyl + 14 CH <sub>4</sub> → 13 C <sub>2</sub> H <sub>6</sub>                          | 28.0 <sup>a</sup> | 42.4 | 47.6    | 44.8 | 31.4 | 38.2    | 36.1 |
| hexylcyclohexane + 12 CH <sub>4</sub> → 12 C <sub>2</sub> H <sub>6</sub>                      | 25.4 <sup>a</sup> | 35.3 | 39.7    | 38.6 | 27.2 | 32.9    | 32.5 |
| adamantane + 14 CH <sub>4</sub> → 12 C <sub>2</sub> H <sub>6</sub>                            | 27.6 <sup>a</sup> | 50.6 | 54.0    | 49.4 | 36.8 | 41.4    | 37.8 |
| 1,3-dimethyladamantane + 16 CH <sub>4</sub> → 14 C <sub>2</sub> H <sub>6</sub>                | 39.6 <sup>a</sup> | 66.2 | 71.9    | 66.6 | 47.4 | 55.0    | 51.1 |
| 2,2-dimethyladamantane + 16 CH <sub>4</sub> → 14 C <sub>2</sub> H <sub>6</sub>                | 32.4 <sup>a</sup> | 59.1 | 65.3    | 59.1 | 40.5 | 48.8    | 43.5 |
| 1,3,5,7-tetramethyladamantane + 18 CH <sub>4</sub> → 16 C <sub>2</sub> H <sub>6</sub>         | 51.4 <sup>a</sup> | 81.5 | 89.7    | 83.7 | 57.9 | 68.6    | 64.4 |
| diamantane + 22 CH <sub>4</sub> → 18 C <sub>2</sub> H <sub>6</sub>                            | 47.1 <sup>a</sup> | 85.3 | 91.2    | 83.4 | 62.2 | 69.9    | 64.0 |
| The OM $x$ and OM $x$ -D3T energies are corrected by excluding ZPVE and thermal contributions |                   |      |         |      |      |         |      |
| 2,3-dimethylbutane + 4 CH <sub>4</sub> → 5 C <sub>2</sub> H <sub>6</sub>                      | 9.8 <sup>a</sup>  | 12.1 | 14.7    | 14.8 | 7.8  | 11.2    | 11.4 |
| 2-methylpentane + 4 CH <sub>4</sub> → 5 C <sub>2</sub> H <sub>6</sub>                         | 9.7 <sup>a</sup>  | 11.6 | 13.5    | 14.3 | 8.4  | 11.0    | 11.8 |
| 2,2-dimethylbutane + 4 CH <sub>4</sub> → 5 C <sub>2</sub> H <sub>6</sub>                      | 11.4 <sup>a</sup> | 14.9 | 17.6    | 17.7 | 9.3  | 13.0    | 13.2 |
| 3-methylpentane + 4 CH <sub>4</sub> → 5 C <sub>2</sub> H <sub>6</sub>                         | 9.0 <sup>a</sup>  | 10.6 | 12.7    | 13.1 | 7.2  | 10.0    | 10.6 |
| hexane + 4 CH <sub>4</sub> → 5 C <sub>2</sub> H <sub>6</sub>                                  | 8.7 <sup>a</sup>  | 10.1 | 11.6    | 12.6 | 8.0  | 10.0    | 11.1 |
| heptane + 5 CH <sub>4</sub> → 6 C <sub>2</sub> H <sub>6</sub>                                 | 10.9 <sup>a</sup> | 12.6 | 14.5    | 15.8 | 10.1 | 12.5    | 14.0 |
| 2,4-dimethylpentane + 5 CH <sub>4</sub> → 6 C <sub>2</sub> H <sub>6</sub>                     | 13.1 <sup>a</sup> | 15.4 | 18.4    | 19.1 | 10.4 | 14.4    | 15.2 |
| 2-methylhexane + 5 CH <sub>4</sub> → 6 C <sub>2</sub> H <sub>6</sub>                          | 11.9 <sup>a</sup> | 14.1 | 16.5    | 17.5 | 10.4 | 13.5    | 14.7 |
| 2,2-dimethylpentane + 5 CH <sub>4</sub> → 6 C <sub>2</sub> H <sub>6</sub>                     | 13.5 <sup>a</sup> | 17.5 | 20.7    | 21.0 | 11.4 | 15.6    | 16.2 |
| 2,3-dimethylpentane + 5 CH <sub>4</sub> → 6 C <sub>2</sub> H <sub>6</sub>                     | 11.4 <sup>a</sup> | 13.9 | 17.2    | 17.3 | 8.9  | 13.2    | 13.4 |
| 2,2,3-trimethylbutane + 5 CH <sub>4</sub> → 6 C <sub>2</sub> H <sub>6</sub>                   | 13.0 <sup>a</sup> | 17.9 | 21.7    | 21.4 | 10.3 | 15.5    | 15.4 |
| 3,3-dimethylpentane + 5 CH <sub>4</sub> → 6 C <sub>2</sub> H <sub>6</sub>                     | 12.8 <sup>a</sup> | 15.8 | 19.5    | 19.3 | 9.2  | 14.1    | 14.0 |
| 3-methylhexane + 5 CH <sub>4</sub> → 6 C <sub>2</sub> H <sub>6</sub>                          | 11.2 <sup>a</sup> | 13.2 | 15.8    | 16.5 | 9.3  | 12.7    | 13.6 |
| 3-ethylpentane + 5 CH <sub>4</sub> → 6 C <sub>2</sub> H <sub>6</sub>                          | 10.2 <sup>a</sup> | 12.6 | 15.4    | 16.0 | 8.6  | 12.3    | 13.0 |
| tetramethylbutane + 6 CH <sub>4</sub> → 7 C <sub>2</sub> H <sub>6</sub>                       | 15.1 <sup>a</sup> | 22.7 | 28.0    | 27.1 | 11.5 | 18.8    | 18.1 |
| cyclopentane + 5 CH <sub>4</sub> → 5 C <sub>2</sub> H <sub>6</sub>                            | 2.4 <sup>a</sup>  | 8.0  | 8.3     | 10.5 | 4.2  | 4.7     | 7.0  |
| cyclohexane + 6 CH <sub>4</sub> → 6 C <sub>2</sub> H <sub>6</sub>                             | 10.7 <sup>a</sup> | 14.4 | 15.7    | 17.2 | 10.5 | 12.3    | 14.0 |
| methylcyclopentane + 6 CH <sub>4</sub> → 6 C <sub>2</sub> H <sub>6</sub>                      | 6.3 <sup>a</sup>  | 12.8 | 13.9    | 16.3 | 7.9  | 9.2     | 12.0 |
| methylcyclohexane + 7 CH <sub>4</sub> → 7 C <sub>2</sub> H <sub>6</sub>                       | 14.9 <sup>a</sup> | 19.4 | 21.4    | 23.3 | 14.1 | 16.8    | 19.0 |
| 1,1-dimethylcyclopentane + 7 CH <sub>4</sub> → 7 C <sub>2</sub> H <sub>6</sub>                | 10.7 <sup>a</sup> | 19.3 | 21.5    | 23.5 | 11.5 | 14.5    | 16.9 |
| cis-1,3-dimethylcyclopentane + 7 CH <sub>4</sub> → 7 C <sub>2</sub> H <sub>6</sub>            | 10.1 <sup>a</sup> | 18.5 | 19.6    | 22.2 | 12.5 | 14.1    | 17.1 |
| cis-1,2-dimethylcyclopentane + 7 CH <sub>4</sub> → 7 C <sub>2</sub> H <sub>6</sub>            | 9.1 <sup>a</sup>  | 16.7 | 18.9    | 20.2 | 10.1 | 13.0    | 14.5 |
| trans-1,2-dimethylcyclopentane + 7 CH <sub>4</sub> → 7 C <sub>2</sub> H <sub>6</sub>          | 10.5 <sup>a</sup> | 17.6 | 19.5    | 22.1 | 12.0 | 14.5    | 16.8 |
| trans-1,3-dimethylcyclopentane + 7 CH <sub>4</sub> → 7 C <sub>2</sub> H <sub>6</sub>          | 9.8 <sup>a</sup>  | 18.8 | 20.5    | 22.5 | 12.8 | 15.0    | 17.4 |

... continued on next page ...

Table S49: ... continued from previous page ...

| Species                                                                               | Ref.              | OM2  | OM2-D3T | ODM2 | OM3  | OM3-D3T | ODM3 |
|---------------------------------------------------------------------------------------|-------------------|------|---------|------|------|---------|------|
| spiro[4.5]decane + 12 CH <sub>4</sub> → 11 C <sub>2</sub> H <sub>6</sub>              | 19.3 <sup>a</sup> | 31.3 | 35.2    | 37.5 | 19.9 | 25.1    | 27.9 |
| bicyclo[3.3.2]decane + 12 CH <sub>4</sub> → 11 C <sub>2</sub> H <sub>6</sub>          | 9.7 <sup>a</sup>  | 9.3  | 14.1    | 15.3 | 2.8  | 8.8     | 9.3  |
| decahydroazulene + 12 CH <sub>4</sub> → 11 C <sub>2</sub> H <sub>6</sub>              | 15.2 <sup>a</sup> | 24.1 | 27.7    | 30.8 | 15.8 | 20.4    | 23.8 |
| trans-decalin + 12 CH <sub>4</sub> → 11 C <sub>2</sub> H <sub>6</sub>                 | 26.1 <sup>a</sup> | 34.0 | 37.7    | 41.0 | 24.6 | 29.5    | 33.5 |
| cis-decalin + 12 CH <sub>4</sub> → 11 C <sub>2</sub> H <sub>6</sub>                   | 23.4 <sup>a</sup> | 31.4 | 35.5    | 37.9 | 21.7 | 27.1    | 29.9 |
| dicyclohexyl + 14 CH <sub>4</sub> → 13 C <sub>2</sub> H <sub>6</sub>                  | 28.0 <sup>a</sup> | 36.6 | 41.8    | 44.8 | 25.7 | 32.5    | 36.1 |
| hexylcyclohexane + 12 CH <sub>4</sub> → 12 C <sub>2</sub> H <sub>6</sub>              | 25.4 <sup>a</sup> | 31.2 | 35.7    | 38.6 | 23.3 | 29.0    | 32.5 |
| adamantane + 14 CH <sub>4</sub> → 12 C <sub>2</sub> H <sub>6</sub>                    | 27.6 <sup>a</sup> | 43.1 | 46.5    | 49.4 | 29.4 | 34.0    | 37.8 |
| 1,3-dimethyladamantane + 16 CH <sub>4</sub> → 14 C <sub>2</sub> H <sub>6</sub>        | 39.6 <sup>a</sup> | 57.8 | 63.5    | 66.6 | 38.9 | 46.5    | 51.1 |
| 2,2-dimethyladamantane + 16 CH <sub>4</sub> → 14 C <sub>2</sub> H <sub>6</sub>        | 32.4 <sup>a</sup> | 50.9 | 57.1    | 59.1 | 32.0 | 40.4    | 43.5 |
| 1,3,5,7-tetramethyladamantane + 18 CH <sub>4</sub> → 16 C <sub>2</sub> H <sub>6</sub> | 51.4 <sup>a</sup> | 72.2 | 80.3    | 83.7 | 48.2 | 59.0    | 64.4 |
| diamantane + 22 CH <sub>4</sub> → 18 C <sub>2</sub> H <sub>6</sub>                    | 47.1 <sup>a</sup> | 72.9 | 78.8    | 83.4 | 49.8 | 57.6    | 64.0 |

a L.Goerigk and S.Grimme, J.Chem.Theory Comput. 7, 291 (2011) ; H.Krieg, and S.Grimme, Mol.Phys. 108, 2655 (2010).

Table S50: Benchmark Results for the IDISP Subset of the GMTKN30-CHNOF Set. Reaction Energies (kcal/mol)

| Species                                              | Ref.               | OM2   | OM2-D3T | ODM2  | OM3   | OM3-D3T | ODM3  |
|------------------------------------------------------|--------------------|-------|---------|-------|-------|---------|-------|
| 2 anthracene → anthracene dimer                      | -9.0 <sup>a</sup>  | -18.3 | -28.9   | -29.1 | -17.9 | -31.5   | -30.6 |
| 2 p-xylene → [2.2]-paracyclophane + 2 H <sub>2</sub> | -58.5 <sup>a</sup> | -52.1 | -45.2   | -62.6 | -54.8 | -45.8   | -56.8 |
| n-octane → iso-octane                                | -1.9 <sup>a</sup>  | -8.1  | -11.1   | -7.9  | -0.5  | -4.8    | -1.1  |
| [C14H30]folded → [C14H30]linear                      | 8.2 <sup>a</sup>   | -0.5  | -6.5    | -0.2  | 11.8  | 3.4     | 10.9  |
| [C22H46]folded → [C22H46]linear                      | -3.1 <sup>a</sup>  | -6.4  | -4.2    | -5.2  | -7.0  | -4.3    | -5.7  |
| n-undecane → 2,2,3,3,4,4-hexamethyl-pentane          | 0.4 <sup>a</sup>   | -9.8  | -0.6    | -3.3  | -15.2 | -3.5    | -7.1  |

<sup>a</sup> L.Goerigk and S.Grimme, J.Chem.Theory Comput. 7, 291 (2011) ; T.Schwabe and S.Grimme, Phys.Chem.Chem.Phys. 9, 3397 (2007).

Table S51: Benchmark Results for the WATER27 Subset of the GMTKN30-CHNOF Set.  
Reaction Energies (kcal/mol)

| Species                             | Ref.               | OM2   | OM2-D3T | ODM2  | OM3   | OM3-D3T | ODM3  |
|-------------------------------------|--------------------|-------|---------|-------|-------|---------|-------|
| [H2O]2                              | 5.0 <sup>a</sup>   | 4.0   | 4.4     | 4.5   | 4.5   | 5.0     | 4.6   |
| [H2O]3 cyclic                       | 15.8 <sup>a</sup>  | 12.0  | 13.2    | 13.7  | 13.1  | 14.8    | 13.2  |
| [H2O]4 cyclic                       | 27.4 <sup>a</sup>  | 22.9  | 24.8    | 26.0  | 26.6  | 29.3    | 27.0  |
| [H2O]5 cyclic                       | 35.9 <sup>a</sup>  | 30.6  | 33.0    | 34.4  | 36.2  | 39.5    | 36.6  |
| [H2O]6 prism                        | 46.0 <sup>a</sup>  | 36.9  | 41.4    | 43.3  | 41.1  | 47.1    | 42.9  |
| [H2O]6 cage                         | 45.8 <sup>a</sup>  | 36.1  | 40.4    | 42.4  | 40.7  | 46.5    | 42.5  |
| [H2O]6 book                         | 45.3 <sup>a</sup>  | 37.3  | 40.8    | 42.7  | 43.2  | 48.1    | 44.3  |
| [H2O]6 cyclic                       | 44.3 <sup>a</sup>  | 38.8  | 41.7    | 43.0  | 46.2  | 50.1    | 46.3  |
| [H2O]8 cube (D2d)                   | 72.6 <sup>a</sup>  | 58.0  | 64.8    | 68.2  | 66.1  | 75.3    | 69.3  |
| [H2O]8 cube (S4)                    | 72.6 <sup>a</sup>  | 58.0  | 64.8    | 68.3  | 66.1  | 75.2    | 69.2  |
| [H2O]20 dodecahedron                | 200.1 <sup>a</sup> | 160.1 | 177.4   | 186.1 | 188.8 | 211.6   | 196.8 |
|                                     | 198.6 <sup>b</sup> |       |         |       |       |         |       |
| [H2O]20 fused cubes                 | 212.6 <sup>a</sup> | 164.1 | 186.3   | 195.3 | 181.7 | 211.3   | 193.3 |
|                                     | 208.0 <sup>b</sup> |       |         |       |       |         |       |
| [H2O]20 face-sharing                | 215.0 <sup>a</sup> | 166.6 | 188.0   | 196.9 | 187.4 | 215.9   | 198.6 |
|                                     | 208.0 <sup>b</sup> |       |         |       |       |         |       |
| [H2O]20 edge-sharing                | 217.9 <sup>a</sup> | 167.3 | 188.3   | 197.1 | 188.6 | 216.3   | 198.6 |
|                                     | 209.7 <sup>b</sup> |       |         |       |       |         |       |
| H3O+[H2O]                           | 33.5 <sup>a</sup>  | 35.2  | 35.7    | 35.0  | 43.0  | 43.8    | 42.7  |
| H3O+[H2O]2                          | 56.9 <sup>a</sup>  | 56.2  | 57.3    | 56.2  | 65.5  | 67.0    | 64.6  |
| H3O+[H2O]3                          | 76.5 <sup>a</sup>  | 74.2  | 75.8    | 75.3  | 83.5  | 85.8    | 82.8  |
| H3O+[H2O]6 (3D)                     | 117.8 <sup>a</sup> | 107.3 | 112.2   | 114.5 | 118.5 | 125.1   | 120.7 |
| H3O+[H2O]2 (2D)                     | 114.9 <sup>a</sup> | 110.2 | 113.9   | 114.6 | 124.4 | 129.4   | 125.3 |
| OH-[H2O]                            | 26.6 <sup>a</sup>  | 34.9  | 35.3    | 36.6  | 41.4  | 41.9    | 42.9  |
| OH-[H2O]2                           | 48.4 <sup>a</sup>  | 53.6  | 54.4    | 56.1  | 61.0  | 62.3    | 62.3  |
| OH-[H2O]3                           | 67.6 <sup>a</sup>  | 70.1  | 71.6    | 74.2  | 78.3  | 80.5    | 80.2  |
| OH-[H2O]4 (C4)                      | 84.8 <sup>a</sup>  | 82.4  | 85.3    | 88.0  | 88.6  | 92.7    | 90.7  |
| OH-[H2O]4 (Cs)                      | 84.8 <sup>a</sup>  | 82.0  | 85.4    | 88.0  | 89.7  | 94.4    | 92.4  |
| OH-[H2O]5                           | 100.7 <sup>a</sup> | 92.9  | 97.6    | 100.7 | 98.1  | 104.6   | 100.8 |
| OH-[H2O]6                           | 115.7 <sup>a</sup> | 104.7 | 110.6   | 114.6 | 111.3 | 119.4   | 115.3 |
| [H2O]8 cube (S4) - H3O+[H2O]6 [OH-] | 28.5 <sup>a</sup>  | 20.3  | 21.1    | 20.0  | -0.0  | 1.0     | 4.6   |

<sup>a</sup> L.Goerigk and S.Grimme, J.Chem.Theory Comput. 6, 107 (2010) ; V.S.Bryantsev, M.S.Diallo, A.C.T.van Duin, and W.A.Goddard III, J.Chem.Theory Comput. 5, 1016 (2009).



Table S52: Benchmark Results for the S22 Subset of the GMTKN30-CHNOF Set. Dissociation Energies (kcal/mol)

| Species | Ref.              | OM2  | OM2-D3T | ODM2 | OM3  | OM3-D3T | ODM3 |
|---------|-------------------|------|---------|------|------|---------|------|
| 01      | 3.2 <sup>a</sup>  | 2.0  | 2.5     | 2.5  | 2.1  | 2.8     | 2.7  |
| 02      | 5.0 <sup>a</sup>  | 4.2  | 4.5     | 4.8  | 4.5  | 5.1     | 4.7  |
| 03      | 18.8 <sup>a</sup> | 13.6 | 14.8    | 15.6 | 11.5 | 13.3    | 12.9 |
| 04      | 16.1 <sup>a</sup> | 13.0 | 14.3    | 15.1 | 11.7 | 13.5    | 13.8 |
| 05      | 20.7 <sup>a</sup> | 17.5 | 19.5    | 19.6 | 16.2 | 18.7    | 18.7 |
| 06      | 17.0 <sup>a</sup> | 11.0 | 13.4    | 13.2 | 11.3 | 14.3    | 16.1 |
| 07      | 16.7 <sup>a</sup> | 11.1 | 13.6    | 13.4 | 11.4 | 14.5    | 16.3 |
| 08      | 0.5 <sup>a</sup>  | -0.1 | 0.5     | 0.5  | -0.1 | 0.5     | 0.5  |
| 09      | 1.5 <sup>a</sup>  | 0.4  | 1.5     | 1.4  | -0.2 | 1.2     | 1.0  |
| 10      | 1.4 <sup>a</sup>  | 0.2  | 1.4     | 1.4  | -0.1 | 1.4     | 1.3  |
| 11      | 2.6 <sup>a</sup>  | -1.1 | 2.4     | 2.8  | -1.0 | 3.2     | 3.4  |
| 12      | 4.2 <sup>a</sup>  | 0.9  | 4.4     | 5.1  | 0.6  | 4.9     | 5.3  |
| 13      | 9.7 <sup>a</sup>  | 4.3  | 9.1     | 9.3  | 3.9  | 9.8     | 9.7  |
| 14      | 4.6 <sup>a</sup>  | -1.6 | 3.2     | 3.7  | -1.4 | 4.5     | 4.5  |
| 15      | 11.7 <sup>a</sup> | 4.0  | 10.6    | 11.1 | 3.3  | 11.5    | 11.2 |
| 16      | 1.5 <sup>a</sup>  | 1.1  | 1.6     | 1.6  | 0.6  | 1.3     | 1.2  |
| 17      | 3.3 <sup>a</sup>  | 2.3  | 3.5     | 3.4  | 1.9  | 3.4     | 3.1  |
| 18      | 2.3 <sup>a</sup>  | 1.3  | 2.5     | 2.6  | 0.8  | 2.3     | 2.3  |
| 19      | 4.5 <sup>a</sup>  | 3.1  | 4.5     | 4.5  | 1.7  | 3.6     | 3.3  |
| 20      | 2.7 <sup>a</sup>  | 0.7  | 2.8     | 2.7  | -0.1 | 2.5     | 2.4  |
| 21      | 5.6 <sup>a</sup>  | 2.4  | 5.2     | 5.0  | 1.2  | 4.6     | 4.2  |
| 22      | 7.1 <sup>a</sup>  | 3.9  | 6.2     | 6.2  | 3.3  | 6.1     | 5.7  |

<sup>a</sup> L.Goerigk and S.Grimme, *J.Chem.Theory Comput.* 7, 291 (2011) ; P.Jurecka, J.Sponer, J.Cerny, and P.Hobza, *Phys.Chem.Chem.Phys.* 8, 1985 (2006) ; T.Takatani, E.G.Hohenstein, M.Malagoli, M.S.Marshall, and C.D.Sherrill, *J.Chem.Phys.* 132, 144104 (2010).

Table S53: Benchmark Results for the ADIM6 Subset of the GMTKN30-CHNOF Set. Dissociation Energies (kcal/mol)

| Species                | Ref.             | OM2 | OM2-D3T | ODM2 | OM3  | OM3-D3T | ODM3 |
|------------------------|------------------|-----|---------|------|------|---------|------|
| (ethane)2 → 2 ethane   | 1.3 <sup>a</sup> | 0.0 | 1.2     | 1.2  | -0.3 | 1.2     | 1.1  |
| (propane)2 → 2 propane | 2.0 <sup>a</sup> | 0.1 | 1.9     | 1.9  | -0.5 | 1.7     | 1.6  |
| (butane)2 → 2 butane   | 2.8 <sup>a</sup> | 0.2 | 2.8     | 2.8  | -0.6 | 2.6     | 2.4  |
| (pentane)2 → 2 pentane | 3.7 <sup>a</sup> | 0.3 | 3.7     | 3.6  | -0.8 | 3.3     | 3.1  |
| (hexane)2 → 2 hexane   | 4.6 <sup>a</sup> | 0.4 | 4.6     | 4.5  | -1.0 | 4.2     | 3.9  |
| (heptane)2 → 2 heptane | 5.6 <sup>a</sup> | 0.2 | 5.3     | 5.1  | -1.5 | 4.6     | 4.2  |

<sup>a</sup> L.Goerigk and S.Grimme, J.Chem.Theory Comput. 7, 291 (2011) ; S.Tsuzuki, K.Honda, T.Uchimaru, and M.Mikami, J.Chem.Phys. 124, 114304 (2006) ; H.Krieg and S.Grimme, Mol.Phys. 108, 2655 (2010).

Table S54: Benchmark Results for the PCONF Subset of the GMTKN30-CHNOF Set.  
Relative Energies at 0 K (kcal/mol)

| Species | Ref.             | OM2  | OM2-D3T | ODM2 | OM3  | OM3-D3T | ODM3 |
|---------|------------------|------|---------|------|------|---------|------|
| 444     | 0.1 <sup>a</sup> | 0.3  | 2.0     | 1.5  | -0.2 | 2.0     | 1.7  |
| 357     | 0.9 <sup>a</sup> | 1.4  | 2.0     | 1.8  | 1.4  | 2.1     | 1.7  |
| 366     | 1.1 <sup>a</sup> | -1.3 | 1.8     | 0.6  | -0.2 | 3.6     | 3.1  |
| 215     | 0.8 <sup>a</sup> | 1.1  | 2.4     | 1.8  | 0.4  | 2.1     | 1.7  |
| 300     | 1.3 <sup>a</sup> | -1.8 | 0.9     | 0.9  | -1.5 | 1.9     | 1.5  |
| 114     | 1.9 <sup>a</sup> | 3.1  | 3.7     | 2.5  | 3.1  | 3.7     | 3.1  |
| 412     | 2.4 <sup>a</sup> | 1.2  | 1.6     | 1.5  | 0.0  | 0.6     | 0.4  |
| 691     | 2.1 <sup>a</sup> | -0.3 | 2.4     | 2.6  | -0.1 | 3.4     | 3.4  |
| 470     | 2.5 <sup>a</sup> | 1.1  | 2.8     | 1.7  | 0.9  | 3.1     | 1.7  |
| 224     | 2.0 <sup>a</sup> | 2.2  | 3.4     | 1.8  | 1.5  | 3.1     | 2.5  |

<sup>a</sup> L.Goerigk and S.Grimme, *J.Chem.Theory Comput.* 6, 107 (2010) ; D.Reha, H.Valdes, J.Vondrasek, P.Hobza, A.Abu-Riziq, B.Crews, and M.S.de Vries, *Chem.-Eur.J.* 11, 6803 (2005).

Table S55: Benchmark Results for the ACONF Subset of the GMTKN30-CHNOF Set.  
Relative Energies at 0 K (kcal/mol)

| Species  | Ref.             | OM2 | OM2-D3T | ODM2 | OM3 | OM3-D3T | ODM3 |
|----------|------------------|-----|---------|------|-----|---------|------|
| B_G      | 0.6 <sup>a</sup> | 0.9 | 0.7     | 1.1  | 1.0 | 0.8     | 1.2  |
| P_TG     | 0.6 <sup>a</sup> | 0.8 | 0.6     | 0.9  | 1.0 | 0.7     | 1.1  |
| P_GG     | 1.0 <sup>a</sup> | 2.0 | 1.5     | 2.2  | 2.4 | 1.8     | 2.6  |
| P_GX     | 2.8 <sup>a</sup> | 3.3 | 2.9     | 3.4  | 3.3 | 2.7     | 3.5  |
| H_gtt    | 0.6 <sup>a</sup> | 0.8 | 0.6     | 0.9  | 1.0 | 0.7     | 1.1  |
| H_tgt    | 0.6 <sup>a</sup> | 0.7 | 0.5     | 0.8  | 0.9 | 0.7     | 1.0  |
| H_tgg    | 0.9 <sup>a</sup> | 1.9 | 1.3     | 2.1  | 2.4 | 1.6     | 2.6  |
| H_gtg    | 1.2 <sup>a</sup> | 1.6 | 1.2     | 1.8  | 1.9 | 1.4     | 2.2  |
| H_g+t+g- | 1.3 <sup>a</sup> | 1.7 | 1.3     | 2.0  | 2.0 | 1.5     | 2.3  |
| H_ggg    | 1.2 <sup>a</sup> | 2.9 | 2.1     | 3.2  | 3.7 | 2.6     | 3.9  |
| H_g+x-t+ | 2.6 <sup>a</sup> | 3.1 | 2.6     | 3.2  | 3.2 | 2.6     | 3.3  |
| H_t+g+x- | 2.7 <sup>a</sup> | 3.1 | 2.7     | 3.2  | 3.2 | 2.6     | 3.4  |
| H_g+x-g- | 3.3 <sup>a</sup> | 3.8 | 3.1     | 4.0  | 4.0 | 3.1     | 4.2  |
| H_x+g-g- | 3.1 <sup>a</sup> | 4.3 | 3.5     | 4.4  | 4.6 | 3.4     | 4.7  |
| H_x+g-x+ | 4.9 <sup>a</sup> | 6.1 | 5.3     | 6.2  | 6.1 | 4.9     | 6.2  |

<sup>a</sup> L.Goerigk and S.Grimme, J.Chem.Theory Comput. 6, 107 (2010) ; D.Gruzman, A.Karton, and J.M.L.Martin, J.Phys.Chem.A 113, 11974 (2009).

Table S56: Benchmark Results for the SCONF Subset of the GMTKN30-CHNOF Set. Relative Energies at 0 K (kcal/mol)

| Species | Ref.             | OM2  | OM2-D3T | ODM2 | OM3  | OM3-D3T | ODM3 |
|---------|------------------|------|---------|------|------|---------|------|
| C2      | 0.8 <sup>a</sup> | 0.2  | 0.1     | 0.2  | 0.4  | 0.3     | 0.4  |
| C3      | 2.6 <sup>a</sup> | 1.3  | 1.7     | 3.8  | 1.8  | 2.4     | 2.5  |
| C4      | 3.4 <sup>a</sup> | 1.3  | 1.6     | 3.9  | 2.1  | 2.6     | 2.7  |
| C5      | 4.9 <sup>a</sup> | 5.3  | 5.7     | 6.4  | 5.7  | 6.3     | 6.1  |
| C6      | 5.2 <sup>a</sup> | 5.0  | 5.4     | 5.8  | 5.2  | 5.9     | 5.4  |
| C7      | 4.5 <sup>a</sup> | 2.1  | 2.3     | 4.4  | 3.0  | 3.4     | 3.2  |
| C8      | 4.7 <sup>a</sup> | 2.6  | 2.8     | 5.1  | 3.7  | 4.1     | 4.1  |
| C9      | 6.7 <sup>a</sup> | 5.7  | 6.2     | 6.8  | 6.3  | 7.2     | 6.3  |
| C10     | 6.8 <sup>a</sup> | 4.4  | 4.9     | 6.2  | 5.4  | 6.3     | 5.6  |
| C11     | 6.1 <sup>a</sup> | 3.3  | 3.6     | 5.9  | 4.8  | 5.4     | 5.2  |
| C12     | 6.0 <sup>a</sup> | 2.8  | 3.2     | 5.3  | 4.2  | 4.8     | 4.5  |
| C13     | 6.2 <sup>a</sup> | 5.0  | 5.2     | 6.3  | 6.8  | 7.1     | 6.7  |
| C14     | 6.8 <sup>a</sup> | 4.5  | 4.9     | 6.2  | 5.5  | 6.1     | 5.8  |
| C15     | 6.7 <sup>a</sup> | 3.6  | 3.9     | 5.6  | 5.0  | 5.5     | 5.3  |
| G2      | 0.3 <sup>a</sup> | -0.4 | -0.5    | -0.7 | -0.5 | -0.6    | -0.6 |
| G3      | 5.9 <sup>a</sup> | 3.4  | 2.2     | -1.9 | 1.8  | -0.0    | 0.1  |
| G4      | 5.3 <sup>a</sup> | 5.0  | 3.7     | -0.6 | 1.9  | 0.1     | 0.2  |

<sup>a</sup> L.Goerigk and S.Grimme, J.Chem.Theory Comput. 6, 107 (2010) ; G.I.Csonka, A.D.French, G.P.Johnson, and C.A.Stortz, J.Chem.Theory Comput. 5, 679 (2009).

Table S57: Benchmark Results for the MGAE109/11 Subset of the CE345-CHNOF Set. Atomization Energies at 0 K (kcal/mol). The OM*x* and OM*x*-D3T Energies Are Corrected by Excluding ZPVE and Thermal Contributions

| Species    | Ref.                | OM2    | OM2-D3T | ODM2   | OM3    | OM3-D3T | ODM3   |
|------------|---------------------|--------|---------|--------|--------|---------|--------|
| C2F4       | 591.1 <sup>a</sup>  | 578.6  | 580.0   | 581.6  | 580.3  | 582.5   | 581.2  |
| C2H2       | 405.5 <sup>a</sup>  | 404.5  | 405.2   | 405.3  | 404.1  | 405.2   | 405.2  |
| C2H4       | 563.7 <sup>a</sup>  | 562.8  | 564.0   | 563.7  | 561.3  | 563.3   | 562.4  |
| C2H4O      | 651.1 <sup>a</sup>  | 650.5  | 652.0   | 648.4  | 645.4  | 647.9   | 642.4  |
| C2H5       | 603.9 <sup>a</sup>  | 606.3  | 607.7   | 608.3  | 606.2  | 608.5   | 608.2  |
| C2H5O      | 699.0 <sup>a</sup>  | 698.0  | 699.9   | 698.9  | 696.1  | 699.2   | 698.0  |
| C2H5OCH3   | 1095.6 <sup>a</sup> | 1092.9 | 1096.4  | 1094.9 | 1089.5 | 1094.9  | 1092.6 |
| C2H6       | 713.0 <sup>a</sup>  | 712.4  | 714.2   | 713.4  | 711.5  | 714.3   | 712.0  |
| C3H4_all   | 703.5 <sup>a</sup>  | 702.8  | 704.4   | 703.9  | 702.8  | 705.4   | 703.6  |
| C3H4_cyc   | 683.0 <sup>a</sup>  | 680.2  | 681.9   | 681.5  | 682.0  | 684.7   | 682.9  |
| C3H4_pro   | 705.1 <sup>a</sup>  | 702.8  | 704.4   | 704.0  | 702.8  | 705.4   | 703.7  |
| C3H6       | 853.7 <sup>a</sup>  | 855.7  | 858.0   | 856.2  | 854.5  | 858.3   | 853.9  |
| C3H8       | 1007.1 <sup>a</sup> | 1005.5 | 1008.7  | 1007.1 | 1004.7 | 1009.7  | 1005.7 |
| C4H10_anti | 1301.7 <sup>a</sup> | 1298.7 | 1303.3  | 1301.0 | 1298.0 | 1305.3  | 1299.7 |
| C4H10_iso  | 1303.4 <sup>a</sup> | 1300.9 | 1305.8  | 1303.4 | 1299.3 | 1306.9  | 1301.3 |
| C4H4O      | 994.3 <sup>a</sup>  | 986.6  | 989.5   | 988.0  | 984.9  | 989.6   | 985.7  |
| C4H5N      | 1071.9 <sup>a</sup> | 1061.9 | 1065.5  | 1061.5 | 1059.1 | 1064.9  | 1060.5 |
| C4H6_bic   | 987.6 <sup>a</sup>  | 975.7  | 978.7   | 977.1  | 976.7  | 981.5   | 976.4  |
| C4H6_cyc   | 1002.0 <sup>a</sup> | 996.7  | 999.8   | 999.2  | 996.6  | 1001.6  | 998.9  |
| C4H6_tra   | 1012.7 <sup>a</sup> | 1008.4 | 1011.5  | 1009.9 | 1006.8 | 1011.7  | 1008.8 |
| C4H6_ylne  | 1004.5 <sup>a</sup> | 1000.9 | 1003.6  | 1002.4 | 1001.3 | 1005.5  | 1002.0 |
| C4H8_cyc   | 1149.4 <sup>a</sup> | 1148.3 | 1152.4  | 1151.2 | 1147.5 | 1153.9  | 1149.3 |
| C4H8_iso   | 1159.0 <sup>a</sup> | 1158.0 | 1161.9  | 1159.4 | 1156.7 | 1162.9  | 1158.2 |
| C4H9_t     | 1199.7 <sup>a</sup> | 1207.0 | 1211.3  | 1208.7 | 1207.2 | 1213.8  | 1208.5 |
| C5H5N      | 1238.1 <sup>a</sup> | 1239.3 | 1243.8  | 1237.7 | 1238.1 | 1245.3  | 1237.7 |
| C5H8_spi   | 1284.7 <sup>a</sup> | 1285.1 | 1289.5  | 1286.1 | 1285.5 | 1292.3  | 1285.5 |
| C6H6       | 1368.1 <sup>a</sup> | 1367.6 | 1372.6  | 1368.0 | 1366.7 | 1374.7  | 1368.0 |
| CCH        | 265.3 <sup>a</sup>  | 283.8  | 284.2   | 263.0  | 275.0  | 275.7   | 263.2  |
| CF3CN      | 641.2 <sup>a</sup>  | 644.6  | 646.1   | 647.9  | 641.8  | 644.3   | 643.0  |
| CF4        | 477.9 <sup>a</sup>  | 469.6  | 470.5   | 478.4  | 467.7  | 469.2   | 468.5  |
| CH         | 84.2 <sup>a</sup>   | 86.0   | 86.1    | 90.3   | 88.0   | 88.2    | 91.5   |
| CH2_1A1    | 181.5 <sup>a</sup>  | 178.4  | 178.7   | 184.4  | 181.0  | 181.4   | 185.5  |
| CH2_3B1    | 190.8 <sup>a</sup>  | 191.5  | 191.8   | 194.4  | 193.6  | 194.0   | 195.4  |
| CH2CH      | 446.1 <sup>a</sup>  | 448.7  | 449.6   | 450.3  | 449.9  | 451.3   | 450.6  |
| CH2OH      | 410.1 <sup>a</sup>  | 413.5  | 414.3   | 415.1  | 414.3  | 415.5   | 413.9  |
| CH3        | 307.9 <sup>a</sup>  | 308.3  | 308.7   | 310.6  | 305.8  | 306.6   | 309.3  |
| CH3CH2OH   | 810.8 <sup>a</sup>  | 806.9  | 809.1   | 808.4  | 806.5  | 810.1   | 807.1  |
| CH3CHCH2   | 860.9 <sup>a</sup>  | 859.7  | 862.1   | 860.9  | 858.9  | 862.7   | 860.1  |
| CH3CHCH3   | 901.0 <sup>a</sup>  | 906.0  | 908.7   | 907.9  | 906.7  | 911.0   | 908.3  |
| CH3CHO     | 677.4 <sup>a</sup>  | 680.3  | 681.9   | 681.1  | 682.3  | 684.9   | 683.6  |
| CH3CN      | 616.0 <sup>a</sup>  | 615.5  | 616.9   | 616.4  | 613.8  | 616.0   | 617.5  |
| CH3CO      | 582.0 <sup>a</sup>  | 594.6  | 595.8   | 593.6  | 597.2  | 599.9   | 595.5  |
| CH3COCH3   | 978.5 <sup>a</sup>  | 983.8  | 986.8   | 984.8  | 984.4  | 989.1   | 985.9  |
| CH3COOH    | 803.7 <sup>a</sup>  | 797.8  | 799.9   | 798.9  | 797.4  | 800.8   | 799.2  |
| CH3NH2     | 582.3 <sup>a</sup>  | 578.7  | 580.2   | 582.4  | 578.4  | 580.8   | 580.3  |
| CH3NO2     | 601.8 <sup>a</sup>  | 597.2  | 599.0   | 599.7  | 591.9  | 594.8   | 591.6  |
| CH3OCH3    | 798.5 <sup>a</sup>  | 796.9  | 799.1   | 799.0  | 793.6  | 797.1   | 796.5  |
| CH3OH      | 513.5 <sup>a</sup>  | 510.9  | 511.9   | 512.7  | 510.8  | 512.4   | 511.5  |
| CH4        | 420.4 <sup>a</sup>  | 421.7  | 422.4   | 422.7  | 420.2  | 421.3   | 420.8  |
| CHF3       | 458.7 <sup>a</sup>  | 452.4  | 453.2   | 455.0  | 449.2  | 450.5   | 450.0  |
| CN         | 181.4 <sup>a</sup>  | 174.6  | 174.8   | 176.5  | 181.6  | 181.9   | 185.2  |
| CO         | 259.7 <sup>a</sup>  | 250.4  | 250.5   | 248.2  | 250.5  | 250.8   | 246.7  |
| CO2        | 390.2 <sup>a</sup>  | 370.7  | 371.2   | 371.2  | 377.1  | 377.8   | 380.1  |
| F2         | 39.0 <sup>a</sup>   | 37.7   | 37.8    | 39.0   | 36.4   | 36.5    | 35.0   |
| H2         | 109.5 <sup>a</sup>  | 110.9  | 111.0   | 108.2  | 108.9  | 109.0   | 109.1  |
| H2CCO      | 532.7 <sup>a</sup>  | 524.2  | 525.2   | 525.5  | 529.6  | 531.2   | 530.3  |
| H2CO       | 374.7 <sup>a</sup>  | 377.3  | 377.9   | 377.2  | 378.5  | 379.5   | 379.5  |
| H2O        | 233.0 <sup>a</sup>  | 229.4  | 229.6   | 231.8  | 230.3  | 230.7   | 229.9  |
| HCN        | 313.4 <sup>a</sup>  | 318.2  | 318.6   | 319.0  | 315.7  | 316.4   | 318.6  |
| HCO        | 279.4 <sup>a</sup>  | 287.6  | 287.9   | 287.7  | 291.3  | 291.9   | 290.1  |
| HCOCO      | 634.0 <sup>a</sup>  | 640.3  | 641.8   | 640.0  | 642.2  | 644.5   | 643.8  |

... continued on next page ...

Table S57: ... continued from previous page ...

| Species | Ref.               | OM2   | OM2-D3T | ODM2  | OM3   | OM3-D3T | ODM3  |
|---------|--------------------|-------|---------|-------|-------|---------|-------|
| HCOOCH3 | 785.9 <sup>a</sup> | 775.9 | 778.0   | 778.3 | 773.3 | 776.6   | 777.7 |
| HCOOH   | 501.5 <sup>a</sup> | 492.7 | 493.6   | 494.3 | 492.5 | 494.0   | 494.8 |
| HF      | 141.6 <sup>a</sup> | 137.1 | 137.2   | 144.0 | 139.9 | 140.0   | 139.8 |
| HOOH    | 269.0 <sup>a</sup> | 267.1 | 267.5   | 266.8 | 266.9 | 267.7   | 266.2 |
| N2      | 228.5 <sup>a</sup> | 226.1 | 226.3   | 227.6 | 215.2 | 215.6   | 222.5 |
| NF3     | 205.7 <sup>a</sup> | 204.0 | 204.5   | 200.5 | 208.8 | 209.7   | 210.8 |
| NH      | 83.1 <sup>a</sup>  | 83.4  | 83.5    | 88.2  | 88.7  | 88.9    | 92.7  |
| NH2     | 182.6 <sup>a</sup> | 178.7 | 179.0   | 185.7 | 186.1 | 186.5   | 191.0 |
| NH2NH2  | 438.6 <sup>a</sup> | 435.3 | 436.5   | 439.9 | 436.1 | 437.9   | 439.7 |
| NH3     | 298.0 <sup>a</sup> | 291.9 | 292.4   | 298.2 | 296.0 | 296.7   | 297.6 |
| NO      | 152.8 <sup>a</sup> | 149.8 | 150.0   | 150.4 | 158.3 | 158.6   | 159.2 |
| O2      | 120.8 <sup>a</sup> | 117.0 | 117.1   | 115.4 | 123.7 | 123.9   | 120.6 |
| OH      | 107.2 <sup>a</sup> | 109.9 | 109.9   | 111.1 | 110.6 | 110.7   | 111.9 |

<sup>a</sup> Y. Zhao, N.E. Schultz, and D.G. Truhlar, J.Chem.Theory Comput. 2, 364-382 (2006) ; R. Peverati and D.G. Truhlar, J.Chem.Phys. 135, 191102 (2011).

Table S58: Benchmark Results for the IsoL6/11 Subset of the CE345-CHNOF Set. Relative Energies at 0 K (kcal/mol)

| Species    | Ref.              | OM2  | OM2-D3T | ODM2 | OM3  | OM3-D3T | ODM3 |
|------------|-------------------|------|---------|------|------|---------|------|
| 10-product | 6.8 <sup>a</sup>  | 5.6  | 6.4     | 4.7  | 6.2  | 7.5     | 4.1  |
| 13-product | 33.5 <sup>a</sup> | 27.6 | 28.0    | 34.2 | 37.8 | 38.4    | 37.5 |
| 14-product | 5.3 <sup>a</sup>  | 7.6  | 8.4     | 8.2  | 9.2  | 10.3    | 5.7  |
| 20-product | 4.7 <sup>a</sup>  | 3.2  | 2.8     | 3.7  | 4.7  | 4.3     | 3.3  |
| 3-product  | 9.8 <sup>a</sup>  | 10.2 | 10.0    | 10.6 | 1.9  | 1.7     | 4.6  |
| 9-product  | 21.8 <sup>a</sup> | 22.3 | 23.6    | 22.7 | 19.3 | 21.1    | 20.2 |

a S. Luo, Y. Zhao, and D.G. Truhlar, Phys.Chem.Chem.Phys. 13, 13683-13689 (2011).



Table S59: Benchmark Results for the IP21 Subset of the CE345-CHNOF Set. Ionization Energies (kcal/mol)

| Species       | Ref.               | OM2   | OM2-D3T | ODM2  | OM3   | OM3-D3T | ODM3  |
|---------------|--------------------|-------|---------|-------|-------|---------|-------|
| C → C+ + e-   | 259.7 <sup>a</sup> | 230.9 | 230.9   | 221.6 | 227.7 | 227.7   | 218.1 |
| O → O+ + e-   | 313.7 <sup>a</sup> | 309.7 | 309.7   | 306.7 | 309.1 | 309.1   | 302.5 |
| O2 → O2+ + e- | 278.9 <sup>a</sup> | 296.7 | 296.7   | 291.8 | 288.7 | 288.7   | 285.1 |
| OH → OH+ + e- | 298.9 <sup>a</sup> | 296.6 | 296.6   | 294.4 | 297.7 | 297.7   | 294.2 |

<sup>a</sup> Y. Zhao, N.E. Schultz, and D.G. Truhlar, *J.Chem.Theory Comput.* 2, 364-382 (2006) ; Y. Zhao, N.E. Schultz, and D.G. Truhlar, *J.Chem.Phys.* 123, 161103 (2005) ; Y. Zhao and D.G. Truhlar, *J.Phys.Chem.A* 109, 5656-5667 (2005) ; B.J. Lynch, Y. Zhao, and D.G. Truhlar,

Table S60: Benchmark Results for the EA13/03 Subset of the CE345-CHNOF Set. Electron Affinities (kcal/mol)

| Species       | Ref.              | OM2  | OM2-D3T | ODM2 | OM3  | OM3-D3T | ODM3 |
|---------------|-------------------|------|---------|------|------|---------|------|
| C + e- → C-   | 29.2 <sup>a</sup> | 18.3 | 18.3    | 9.0  | 15.1 | 15.1    | 5.5  |
| O + e- → O-   | 33.8 <sup>a</sup> | 28.1 | 28.1    | 25.2 | 27.6 | 27.6    | 20.9 |
| O2 + e- → O2- | 10.8 <sup>a</sup> | 20.6 | 20.6    | 18.0 | 18.5 | 18.5    | 14.6 |
| OH + e- → OH- | 42.3 <sup>a</sup> | 29.4 | 29.4    | 27.5 | 33.6 | 33.6    | 29.5 |

<sup>a</sup> Y. Zhao, N.E. Schultz, and D.G. Truhlar, J.Chem.Theory Comput. 2, 364-382 (2006) ; Y. Zhao, N.E. Schultz, and D.G. Truhlar, J.Chem.Phys. 123, 161103 (2005) ; Y. Zhao and D.G. Truhlar, J.Phys.Chem.A 109, 5656-5667 (2005) ; B.J. Lynch, Y. Zhao, and D.G. Truhlar,

Table S61: Benchmark Results for the PA8/06 Subset of the CE345-CHNOF Set. Proton Affinities (kcal/mol)

| Species           | Ref.               | OM2   | OM2-D3T | ODM2  | OM3   | OM3-D3T | ODM3  |
|-------------------|--------------------|-------|---------|-------|-------|---------|-------|
| C2H2 + H+ → C2H3+ | 156.6 <sup>a</sup> | 133.3 | 133.5   | 141.8 | 133.3 | 133.7   | 138.5 |
| H2 + H+ → H3+     | 105.9 <sup>a</sup> | 42.8  | 42.9    | 34.6  | 65.1  | 65.3    | 60.0  |
| H2O + H+ → H3O+   | 171.8 <sup>a</sup> | 167.7 | 167.9   | 172.6 | 165.9 | 166.2   | 166.2 |
| NH3 + H+ → NH4+   | 211.9 <sup>a</sup> | 221.5 | 221.8   | 221.5 | 213.5 | 213.9   | 215.0 |

a Y. Zhao and D.G. Truhlar, J.Phys.Chem.A 110, 10478-10486 (2006).

Table S62: Benchmark Results for the ABDE12 Subset of the CE345-CHNOF Set. Dissociation Energies (kcal/mol)

| Species                         | Ref.               | OM2   | OM2-D3T | ODM2  | OM3   | OM3-D3T | ODM3  |
|---------------------------------|--------------------|-------|---------|-------|-------|---------|-------|
| CH3-CH3 → CH3 + CH3             | 97.4 <sup>a</sup>  | 96.3  | 97.1    | 92.6  | 100.2 | 101.5   | 93.8  |
| CH3-OCH3 → CH3 + OCH3           | 89.8 <sup>a</sup>  | 85.5  | 86.4    | 84.9  | 85.0  | 86.4    | 83.9  |
| C2H5-CH3 → C2H5 + CH3           | 95.9 <sup>a</sup>  | 91.2  | 92.5    | 88.6  | 93.1  | 94.9    | 88.6  |
| C2H5-H → C2H5 + H               | 108.9 <sup>a</sup> | 106.2 | 106.5   | 105.3 | 105.4 | 105.9   | 103.9 |
| C2H5-OCH3 → C2H5 + OCH3         | 95.3 <sup>a</sup>  | 83.4  | 84.6    | 83.1  | 80.6  | 82.4    | 81.0  |
| C2H5-OH → C2H5 + OH             | 100.3 <sup>a</sup> | 91.2  | 91.9    | 89.5  | 90.4  | 91.5    | 87.7  |
| (CH3)2HC-CH3 → (CH3)2HC + CH3   | 95.0 <sup>a</sup>  | 86.9  | 88.6    | 85.3  | 87.3  | 89.8    | 84.2  |
| (CH3)2HC-OCH3 → (CH3)2HC + OCH3 | 91.5 <sup>a</sup>  | 80.7  | 82.4    | 81.8  | 76.9  | 79.3    | 78.6  |
| (CH3)3C-CH3 → (CH3)3C + CH3     | 93.7 <sup>a</sup>  | 83.7  | 85.8    | 83.1  | 82.6  | 85.7    | 80.9  |
| (CH3)3C-H → (CH3)3C + H         | 103.9 <sup>a</sup> | 94.3  | 94.9    | 95.2  | 92.7  | 93.6    | 93.3  |
| (CH3)3C-OCH3 → (CH3)3C + OCH3   | 89.3 <sup>a</sup>  | 78.8  | 80.5    | 81.1  | 73.9  | 77.1    | 76.7  |
| (CH3)3C-OH → (CH3)3C + OH       | 115.0 <sup>a</sup> | 89.9  | 91.2    | 90.9  | 87.0  | 88.9    | 86.6  |

<sup>a</sup> Y. Zhao, N.E. Schultz, and D.G. Truhlar, J.Chem.Theory Comput. 2, 364-382 (2006) ; Y. Zhao and D.G. Truhlar, J.Chem.Phys. 125, 194101 (2006) ; E.I. Izgorodina, M.L. Coote, and L.J. Radom, J.Phys.Chem.A 109, 7558-7566 (2005) ; R. Peverati, Y. Zhao, and D.G. Truhlar,

Table S63: Benchmark Results for the HC7/11 Subset of the CE345-CHNOF Set. Reaction Energies (kcal/mol)

| Species                                                                                                          | Ref.               | OM2   | OM2-D3T | ODM2  | OM3   | OM3-D3T | ODM3  |
|------------------------------------------------------------------------------------------------------------------|--------------------|-------|---------|-------|-------|---------|-------|
| D3d-octahedrane $\rightarrow$ (CH) <sub>12</sub> #22-isomer                                                      | 14.3 <sup>a</sup>  | 22.3  | 22.3    | 21.7  | 20.6  | 20.9    | 18.7  |
| D3d-octahedrane $\rightarrow$ (CH) <sub>12</sub> #31-isomer                                                      | 25.0 <sup>a</sup>  | 36.1  | 36.6    | 37.1  | 34.6  | 35.7    | 34.0  |
| (CH <sub>3</sub> ) <sub>3</sub> CC(CH <sub>3</sub> ) <sub>3</sub> $\rightarrow$ n-C <sub>8</sub> H <sub>18</sub> | 1.9 <sup>a</sup>   | 7.8   | 10.8    | 7.6   | 0.2   | 4.5     | 0.8   |
| n-C <sub>6</sub> H <sub>14</sub> + 4 CH <sub>4</sub> $\rightarrow$ 5 C <sub>2</sub> H <sub>6</sub>               | 9.8 <sup>a</sup>   | 10.8  | 12.2    | 12.3  | 8.6   | 10.5    | 10.8  |
| n-C <sub>8</sub> H <sub>18</sub> + 6 CH <sub>4</sub> $\rightarrow$ 7 C <sub>2</sub> H <sub>6</sub>               | 14.8 <sup>a</sup>  | 16.2  | 18.4    | 18.6  | 13.0  | 15.9    | 16.4  |
| adamantane $\rightarrow$ 3 C <sub>2</sub> H <sub>4</sub> + 2 C <sub>2</sub> H <sub>2</sub>                       | 194.0 <sup>a</sup> | 175.3 | 185.8   | 191.3 | 178.2 | 193.5   | 192.6 |
| bicycle[2.2.2]octane $\rightarrow$ 3 C <sub>2</sub> H <sub>4</sub> + C <sub>2</sub> H <sub>2</sub>               | 127.2 <sup>a</sup> | 112.5 | 119.7   | 123.7 | 116.3 | 126.9   | 125.9 |

a R. Peverati, Y. Zhao, and D.G. Truhlar, J.Phys.Chem.Lett. 2, 1991-1997 (2011).

Table S64: Benchmark Results for the  $\pi$ TC13 Subset of the CE345-CHNOF Set. Proton Affinities (kcal/mol)

| Species                              | Ref.               | OM2   | OM2-D3T | ODM2  | OM3   | OM3-D3T | ODM3  |
|--------------------------------------|--------------------|-------|---------|-------|-------|---------|-------|
| C10H12 + H+ $\rightarrow$ C10H13+    | 225.9 <sup>a</sup> | 227.9 | 228.3   | 237.1 | 221.3 | 221.8   | 228.4 |
| C2H4 + H+ $\rightarrow$ C2H5+        | 167.8 <sup>a</sup> | 151.7 | 151.9   | 160.0 | 148.4 | 148.8   | 153.3 |
| C4H6 + H+ $\rightarrow$ C4H7+        | 193.4 <sup>a</sup> | 197.1 | 197.4   | 205.7 | 191.1 | 191.6   | 198.0 |
| C6H8 + H+ $\rightarrow$ C6H9+        | 209.7 <sup>a</sup> | 212.4 | 212.7   | 221.3 | 206.0 | 206.6   | 213.1 |
| C8H10 + H+ $\rightarrow$ C8H11+      | 219.7 <sup>a</sup> | 221.7 | 222.0   | 230.7 | 215.1 | 215.7   | 222.2 |
| C9H10NH + H+ $\rightarrow$ C9H10NH2+ | 241.0 <sup>a</sup> | 241.8 | 242.2   | 247.8 | 234.3 | 234.9   | 240.4 |
| CH2NH + H+ $\rightarrow$ CH2NH2+     | 214.5 <sup>a</sup> | 213.7 | 214.0   | 218.2 | 208.6 | 209.0   | 213.1 |
| C3H4NH + H+ $\rightarrow$ C3H4NH2+   | 226.2 <sup>a</sup> | 227.1 | 227.5   | 232.2 | 221.1 | 221.6   | 226.6 |
| C5H6NH + H+ $\rightarrow$ C5H6NH2+   | 233.4 <sup>a</sup> | 234.3 | 234.7   | 239.8 | 227.6 | 228.1   | 233.3 |
| C7H8NH + H+ $\rightarrow$ C7H8NH2+   | 238.2 <sup>a</sup> | 238.8 | 239.2   | 244.6 | 231.6 | 232.2   | 237.6 |

<sup>a</sup> Y. Zhao, N.E. Schultz, and D.G. Truhlar, J.Chem.Phys. 123, 161103 (2005) ; Y. Zhao and D.G. Truhlar, J.Phys.Chem.A 110, 10478-10486 (2006) ; Y. Zhao, and D.G. Truhlar, J.Chem.Phys. 125, 194101 (2006).

Table S65: Benchmark Results for the  $\pi$ TC13 Subset of the CE345-CHNOF Set. Relative Energies at 0 K (kcal/mol)

| Species                                  | Ref.               | OM2   | OM2-D3T | ODM2  | OM3   | OM3-D3T | ODM3  |
|------------------------------------------|--------------------|-------|---------|-------|-------|---------|-------|
| H2C=C=CH2 $\rightarrow$ HCC-CH3          | -1.4 <sup>a</sup>  | -0.5  | -0.4    | -0.9  | -0.6  | -0.6    | -1.0  |
| H2C=CCC=CH2 $\rightarrow$ HCC-CC-CH3     | -8.8 <sup>a</sup>  | -8.4  | -8.4    | -9.0  | -8.8  | -8.7    | -9.6  |
| H2C=CCCC=CH2 $\rightarrow$ HCC-CC-CC-CH3 | -14.3 <sup>a</sup> | -15.6 | -15.6   | -16.4 | -16.1 | -16.0   | -17.4 |

<sup>a</sup> Y. Zhao, N.E. Schultz, and D.G. Truhlar, J.Chem.Phys. 123, 161103 (2005) ; Y. Zhao and D.G. Truhlar, J.Phys.Chem.A 110, 10478-10486 (2006) ; Y. Zhao, and D.G. Truhlar, J.Chem.Phys. 125, 194101 (2006).

Table S66: Benchmark Results for the HTBH38/08 Subset of the CE345-CHNOF Set. Barriers at 0 K (kcal/mol)

| Species              | Ref.              | OM2  | OM2-D3T | ODM2 | OM3  | OM3-D3T | ODM3 |
|----------------------|-------------------|------|---------|------|------|---------|------|
| TS C2H5 + NH2        | 7.5 <sup>a</sup>  | 11.1 | 10.1    | 10.6 | 6.7  | 5.4     | 7.6  |
| TS C2H5 + NH2        | 18.3 <sup>a</sup> | 19.8 | 19.0    | 18.2 | 12.5 | 11.5    | 13.0 |
| TS CH3 + H2          | 12.1 <sup>a</sup> | 5.2  | 4.7     | 1.2  | 0.7  | -0.1    | -1.0 |
| TS CH3 + H2          | 15.3 <sup>a</sup> | 4.2  | 3.8     | 5.1  | 2.1  | 1.5     | 1.3  |
| TS CH3 + NH2         | 8.0 <sup>a</sup>  | 7.8  | 7.2     | 7.3  | 2.9  | 1.9     | 3.8  |
| TS CH3 + NH2         | 22.4 <sup>a</sup> | 23.6 | 22.9    | 21.9 | 16.6 | 15.7    | 16.9 |
| TS F + H2            | 1.4 <sup>a</sup>  | 4.8  | 4.6     | 3.6  | 7.0  | 6.8     | 5.9  |
| TS F + H2            | 33.4 <sup>a</sup> | 31.0 | 30.9    | 39.5 | 38.2 | 38.0    | 36.7 |
| TS H + HO            | 10.5 <sup>a</sup> | 1.2  | 1.0     | -0.3 | -0.1 | -0.5    | -0.2 |
| TS H + HO            | 12.9 <sup>a</sup> | 1.4  | 1.2     | -3.2 | -2.6 | -2.9    | -3.0 |
| TS H + H2            | 9.6 <sup>a</sup>  | 1.3  | 1.0     | 1.4  | -5.1 | -5.6    | -6.8 |
| TS NH2 + CH4         | 14.5 <sup>a</sup> | 18.2 | 17.5    | 17.2 | 12.9 | 11.8    | 14.2 |
| TS NH2 + CH4         | 17.8 <sup>a</sup> | 18.3 | 17.6    | 17.6 | 10.0 | 8.9     | 9.3  |
| TS NH2 + C2H6        | 10.4 <sup>a</sup> | 14.7 | 13.9    | 13.6 | 9.5  | 8.2     | 10.6 |
| TS NH2 + C2H6        | 17.4 <sup>a</sup> | 21.9 | 20.9    | 20.9 | 14.4 | 13.0    | 13.4 |
| TS O + CH4           | 13.5 <sup>a</sup> | 2.5  | 2.2     | 1.2  | 2.4  | 1.9     | 3.8  |
| TS O + CH4           | 7.9 <sup>a</sup>  | 3.4  | 2.9     | 0.2  | 3.4  | 2.7     | 4.2  |
| TS OH + H2           | 4.9 <sup>a</sup>  | 5.2  | 4.9     | -0.0 | 2.7  | 2.2     | 3.1  |
| TS OH + H2           | 21.2 <sup>a</sup> | 12.6 | 12.4    | 12.5 | 12.2 | 11.9    | 12.0 |
| TS OH + NH3          | 3.0 <sup>a</sup>  | 8.9  | 8.4     | 8.2  | 4.3  | 3.5     | 4.1  |
| TS OH + NH3          | 12.7 <sup>a</sup> | 17.3 | 16.7    | 16.4 | 15.3 | 14.5    | 15.6 |
| TS OH + CH4          | 6.5 <sup>a</sup>  | 2.9  | 2.3     | -0.2 | 3.7  | 3.0     | 5.2  |
| TS OH + CH4          | 19.6 <sup>a</sup> | 11.3 | 10.7    | 8.4  | 11.9 | 11.0    | 11.8 |
| TS OH + C2H6         | 3.2 <sup>a</sup>  | 0.7  | 0.1     | -2.6 | 1.9  | 1.0     | 3.1  |
| TS OH + C2H6         | 19.9 <sup>a</sup> | 16.2 | 15.4    | 12.9 | 17.9 | 16.7    | 17.4 |
| TS s-t-C5H8 → c-C5H8 | 38.4 <sup>a</sup> | 34.7 | 34.2    | 35.7 | 33.8 | 33.0    | 35.7 |

<sup>a</sup> Y. Zhao, N.E. Schultz, and D.G. Truhlar, *J.Chem.Theory Comput.* 2, 364-382 (2006) ; Y. Zhao, B.J. Lynch, and D.G. Truhlar, *Phys.Chem.Chem.Phys.* 7, 43-52 (2005) ; Y. Zhao, N. Gonzalez-Garcia, and D.G. Truhlar, *J.Phys.Chem.A* 109, 2012-2018 (2005) ;



Table S67: Benchmark Results for the NHTBH38/08 Subset of the CE345-CHNOF Set. Barriers at 0 K (kcal/mol)

| Species       | Ref.               | OM2  | OM2-D3T | ODM2  | OM3   | OM3-D3T | ODM3  |
|---------------|--------------------|------|---------|-------|-------|---------|-------|
| TS CH3 + C2H4 | 6.8 <sup>a</sup>   | 10.5 | 9.3     | 8.9   | 10.3  | 8.6     | 9.1   |
| TS CH3 + C2H4 | 33.0 <sup>a</sup>  | 35.0 | 34.9    | 36.2  | 37.7  | 37.6    | 38.5  |
| TS F- + CH3F  | -0.3 <sup>a</sup>  | 13.7 | 13.4    | 14.3  | 18.0  | 17.5    | 16.2  |
| TS F- + CH3F  | 13.4 <sup>a</sup>  | 22.5 | 22.5    | 23.6  | 26.1  | 26.1    | 25.0  |
| TS H + N2     | 14.4 <sup>a</sup>  | 2.5  | 2.2     | 2.4   | -7.0  | -7.4    | -5.7  |
| TS H + N2     | 10.6 <sup>a</sup>  | 9.5  | 9.4     | 14.4  | 13.4  | 13.2    | 12.0  |
| TS H + CO     | 3.2 <sup>a</sup>   | -1.8 | -2.1    | -2.7  | -0.8  | -1.3    | -1.7  |
| TS H + CO     | 22.7 <sup>a</sup>  | 31.5 | 31.4    | 36.8  | 36.0  | 35.7    | 41.7  |
| TS H + F2     | 2.3 <sup>a</sup>   | 3.6  | 3.5     | 0.5   | 6.6   | 6.3     | 3.2   |
| TS H + F2     | 105.8 <sup>a</sup> | 99.9 | 99.7    | 105.5 | 106.6 | 106.4   | 108.0 |
| TS H + FH     | 42.2 <sup>a</sup>  | -1.2 | -1.4    | -9.1  | 1.7   | 1.5     | -5.3  |
| TS H + N2O    | 17.1 <sup>a</sup>  | -1.3 | -1.7    | -4.7  | -4.3  | -4.8    | -4.8  |
| TS H + N2O    | 82.3 <sup>a</sup>  | 68.5 | 67.9    | 65.7  | 68.8  | 67.9    | 65.8  |
| TS H + C2H4   | 1.7 <sup>a</sup>   | 4.2  | 3.7     | 3.8   | 4.8   | 4.0     | 4.3   |
| TS H + C2H4   | 41.8 <sup>a</sup>  | 43.5 | 43.3    | 48.4  | 45.6  | 45.3    | 50.1  |
| TS H + FCH3   | 30.4 <sup>a</sup>  | 10.1 | 9.9     | 5.0   | 14.5  | 14.2    | 10.2  |
| TS H + FCH3   | 57.0 <sup>a</sup>  | 30.1 | 29.7    | 35.3  | 39.5  | 38.9    | 36.6  |
| TS HCN        | 48.1 <sup>a</sup>  | 89.8 | 89.8    | 93.0  | 76.9  | 76.9    | 82.6  |
| TS HCN        | 32.8 <sup>a</sup>  | 72.1 | 72.2    | 79.6  | 75.1  | 75.1    | 85.5  |
| TS OH- + CH3F | -2.4 <sup>a</sup>  | 11.4 | 10.8    | 11.8  | 11.7  | 10.8    | 6.7   |
| TS OH- + CH3F | 17.7 <sup>a</sup>  | 26.6 | 26.2    | 26.7  | 31.1  | 30.5    | 34.9  |
| TS OH- + CH3F | 11.0 <sup>a</sup>  | 20.7 | 20.6    | 21.7  | 20.8  | 20.5    | 16.7  |
| TS OH- + CH3F | 47.2 <sup>a</sup>  | 57.2 | 57.2    | 61.0  | 63.4  | 63.4    | 66.0  |

<sup>a</sup> Y. Zhao, N.E. Schultz, and D.G. Truhlar, J.Chem.Theory Comput. 2, 364-382 (2006) ; Y. Zhao, B.J. Lynch, and D.G. Truhlar, Phys.Chem.Chem.Phys. 7, 43-52 (2005) ; Y. Zhao, N. Gonzalez-Garcia, and D.G. Truhlar, J.Phys.Chem.A 109, 2012-2018 (2005) ;

Table S68: Benchmark Results for the NCCE31/05 Subset of the CE345-CHNOF Set. Dissociation Energies (kcal/mol)

| Species       | Ref.              | OM2  | OM2-D3T | ODM2 | OM3  | OM3-D3T | ODM3 |
|---------------|-------------------|------|---------|------|------|---------|------|
| C2H2-C2H2     | 1.3 <sup>a</sup>  | 1.0  | 1.5     | 1.5  | 0.6  | 1.3     | 1.2  |
| C2H4-C2H4     | 1.4 <sup>a</sup>  | 0.4  | 1.5     | 1.4  | -0.1 | 1.3     | 1.1  |
| C2H4-F2       | 1.1 <sup>a</sup>  | -0.3 | -0.0    | -0.0 | -0.6 | -0.1    | -0.1 |
| CH4-CH4       | 0.5 <sup>a</sup>  | -0.1 | 0.5     | 0.5  | -0.2 | 0.5     | 0.5  |
| H2O-H2O       | 5.0 <sup>a</sup>  | 4.0  | 4.3     | 4.5  | 4.4  | 4.9     | 4.6  |
| HCONH2-HCONH2 | 14.9 <sup>a</sup> | 11.9 | 13.3    | 13.6 | 10.7 | 12.5    | 11.9 |
| HCOOH-HCOOH   | 16.1 <sup>a</sup> | 12.6 | 13.8    | 14.5 | 11.0 | 12.7    | 12.1 |
| HF-HF         | 4.6 <sup>a</sup>  | 1.6  | 1.8     | 2.3  | -0.1 | 0.2     | 0.2  |
| NH3-NH3       | 3.1 <sup>a</sup>  | 2.0  | 2.5     | 2.5  | 2.3  | 2.9     | 3.1  |
| NH3-H2O       | 6.4 <sup>a</sup>  | 4.5  | 5.0     | 4.4  | 5.7  | 6.4     | 6.7  |
| P-C6H6-C6H6   | 2.8 <sup>a</sup>  | -1.7 | 1.2     | 1.6  | -2.2 | 1.2     | 1.5  |
| S-C6H6-C6H6   | 1.8 <sup>a</sup>  | -2.1 | 0.4     | 0.8  | -2.4 | 0.5     | 0.8  |
| T-C6H6-C6H6   | 2.7 <sup>a</sup>  | 0.2  | 2.1     | 2.1  | -1.2 | 1.2     | 1.2  |

<sup>a</sup> Y. Zhao and D.G. Truhlar, J.Phys.Chem.A 109, 5656-5667 (2005) ; Y. Zhao and D.G. Truhlar, J.Chem.Theory Comput. 1, 415-432 (2005).

Table S69: Benchmark Results for the PDDG Set. Heats of Formation (kcal/mol)

| Species                          | Ref.               | OM2   | OM2-D3T | ODM2  | OM3   | OM3-D3T | ODM3  |
|----------------------------------|--------------------|-------|---------|-------|-------|---------|-------|
| 01.zt Hydrogen                   | 0.0 <sup>a</sup>   | -3.4  | -3.5    | -0.1  | -0.0  | -0.1    | 0.0   |
| 02.zt Methane                    | -17.9 <sup>b</sup> | -19.3 | -19.9   | -19.3 | -18.0 | -19.1   | -17.8 |
| 03.zt Ethane                     | -20.0 <sup>c</sup> | -21.2 | -23.0   | -20.8 | -20.8 | -23.6   | -20.0 |
| 04.zt n-Propane                  | -25.0 <sup>c</sup> | -25.5 | -28.7   | -25.2 | -25.4 | -30.4   | -24.8 |
| 05.zt n-Butane                   | -30.0 <sup>c</sup> | -30.1 | -34.8   | -29.9 | -30.3 | -37.5   | -29.8 |
| 06.zt n-Pentane                  | -35.1 <sup>c</sup> | -34.7 | -40.8   | -34.7 | -35.2 | -44.6   | -34.9 |
| 07.zt n-Hexane                   | -40.0 <sup>c</sup> | -39.2 | -46.9   | -39.4 | -40.0 | -51.6   | -39.9 |
| 08.zt n-Heptane                  | -44.9 <sup>c</sup> | -43.8 | -53.0   | -44.2 | -44.8 | -58.7   | -45.0 |
| 09.zt n-Octane                   | -49.8 <sup>c</sup> | -48.3 | -59.0   | -48.9 | -49.7 | -65.8   | -50.1 |
| 10.zt n-Nonane                   | -54.8 <sup>c</sup> | -52.9 | -65.1   | -53.7 | -54.5 | -72.9   | -55.1 |
| 11.zt n-Decane                   | -59.6 <sup>b</sup> | -57.5 | -71.2   | -58.4 | -59.3 | -79.9   | -60.2 |
| 12.zt 2-Methylpropane            | -32.1 <sup>c</sup> | -31.8 | -36.7   | -31.9 | -31.3 | -38.8   | -31.1 |
| 13.zt 2,2-Dimethylpropane        | -40.1 <sup>c</sup> | -39.6 | -46.4   | -40.2 | -37.6 | -48.1   | -38.2 |
| 14.zt 2-Methylbutane             | -36.9 <sup>c</sup> | -35.9 | -42.4   | -36.1 | -35.5 | -45.4   | -35.5 |
| 15.zt 2,2-Dimethylbutane         | -44.5 <sup>b</sup> | -42.8 | -51.6   | -43.4 | -40.7 | -54.0   | -41.5 |
| 16.zt 2-Methylpentane            | -41.8 <sup>b</sup> | -40.4 | -48.5   | -40.9 | -40.3 | -52.5   | -40.6 |
| 17.zt 3-Methylpentane            | -41.1 <sup>b</sup> | -39.9 | -48.2   | -40.2 | -39.5 | -52.0   | -39.9 |
| 18.zt 2,3-Dimethylbutan          | -42.5 <sup>d</sup> | -41.1 | -49.7   | -41.7 | -39.8 | -52.8   | -40.4 |
| 19.zt 2,2,3-Trimethylbutane      | -49.0 <sup>d</sup> | -47.5 | -58.6   | -48.5 | -44.4 | -60.9   | -45.8 |
| 20.zt 3-Ethylpentane             | -45.2 <sup>b</sup> | -42.6 | -53.0   | -43.0 | -42.3 | -57.8   | -42.8 |
| 21.zt 2,2,3,3-Tetramethylbutane  | -53.9 <sup>c</sup> | -53.4 | -67.1   | -54.9 | -48.1 | -68.3   | -50.9 |
| 22.zt 2-Methylhexane             | -46.5 <sup>b</sup> | -45.0 | -54.6   | -45.6 | -45.1 | -59.6   | -45.7 |
| 23.zt 3-Methylhexane             | -45.7 <sup>b</sup> | -44.4 | -54.3   | -45.0 | -44.4 | -59.1   | -45.0 |
| 24.zt 2,2-Dimethylpentane        | -49.2 <sup>b</sup> | -47.3 | -57.7   | -48.2 | -45.5 | -61.1   | -46.6 |
| 25.zt 3,3-Dimethylpentane        | -48.1 <sup>b</sup> | -45.7 | -56.5   | -46.3 | -43.5 | -59.6   | -44.4 |
| 26.zt 2,3-Dimethylpentane        | -47.3 <sup>b</sup> | -44.7 | -55.2   | -45.5 | -43.5 | -59.1   | -44.5 |
| 27.zt 2,4-Dimethylpentane        | -48.2 <sup>b</sup> | -46.1 | -56.3   | -47.1 | -45.3 | -60.6   | -46.5 |
| 28.zt 2-Methylheptane            | -51.5 <sup>b</sup> | -49.5 | -60.7   | -50.4 | -50.0 | -66.7   | -50.8 |
| 29.zt 3-Methylheptane            | -50.8 <sup>b</sup> | -49.0 | -60.4   | -49.8 | -49.2 | -66.3   | -50.1 |
| 30.zt 4-Methylheptane            | -50.7 <sup>b</sup> | -48.9 | -60.4   | -49.8 | -49.2 | -66.3   | -50.1 |
| 31.zt 3-Ethylhexane              | -50.4 <sup>b</sup> | -47.1 | -59.2   | -47.8 | -47.1 | -64.9   | -48.0 |
| 32.zt 2,2-Dimethylhexane         | -53.7 <sup>b</sup> | -51.8 | -63.8   | -53.0 | -50.3 | -68.2   | -51.7 |
| 33.zt 2,3-Dimethylhexane         | -51.1 <sup>b</sup> | -49.3 | -61.3   | -50.3 | -48.3 | -66.2   | -49.6 |
| 34.zt 2,4-Dimethylhexane         | -52.4 <sup>b</sup> | -50.1 | -62.1   | -51.3 | -49.4 | -67.2   | -50.9 |
| 35.zt 2,5-Dimethylhexane         | -53.2 <sup>b</sup> | -50.7 | -62.4   | -51.8 | -50.2 | -67.6   | -51.5 |
| 36.zt 3,3-Dimethylhexane         | -52.6 <sup>b</sup> | -50.2 | -62.6   | -51.1 | -48.3 | -66.7   | -49.6 |
| 37.zt 3,4-Dimethylhexane         | -50.9 <sup>b</sup> | -48.1 | -60.3   | -48.9 | -47.0 | -65.2   | -48.2 |
| 38.zt 3-Ethyl-2-methylpentane    | -50.4 <sup>b</sup> | -47.4 | -60.1   | -48.3 | -46.1 | -64.8   | -47.4 |
| 39.zt 3-Ethyl-3-methylpentane    | -51.4 <sup>b</sup> | -48.7 | -61.8   | -49.7 | -46.3 | -65.6   | -47.7 |
| 40.zt 2,2,3-Trimethylpentane     | -52.6 <sup>b</sup> | -51.3 | -64.3   | -52.6 | -48.3 | -67.5   | -50.1 |
| 41.zt 2,2,4-Trimethylpentane     | -53.5 <sup>b</sup> | -51.6 | -64.2   | -53.2 | -49.4 | -68.1   | -51.4 |
| 42.zt 2,3,3-Trimethylpentane     | -51.7 <sup>b</sup> | -50.2 | -63.3   | -51.2 | -46.9 | -66.4   | -48.5 |
| 43.zt 2,3,4-Trimethylpentane     | -51.9 <sup>b</sup> | -49.6 | -62.4   | -50.8 | -47.6 | -66.5   | -49.1 |
| 44.zt 3,3-Diethylpentane         | -55.6 <sup>c</sup> | -51.4 | -66.8   | -52.7 | -48.8 | -71.3   | -50.7 |
| 45.zt 2,2,3,3-Tetramethylpentane | -56.7 <sup>b</sup> | -55.9 | -71.7   | -57.4 | -50.4 | -73.6   | -52.8 |
| 46.zt 2,2,3,4-Tetramethylpentane | -56.6 <sup>b</sup> | -53.5 | -67.3   | -53.5 | -50.7 | -70.6   | -50.2 |
| 47.zt 2,2,4,4-Tetramethylpentane | -57.8 <sup>b</sup> | -54.7 | -70.0   | -56.9 | -50.8 | -73.2   | -53.5 |
| 48.zt 2,3,3,4-Tetramethylpentane | -56.4 <sup>b</sup> | -51.5 | -67.1   | -52.9 | -47.1 | -70.1   | -49.2 |
| 49.zt Ethylene                   | 12.4 <sup>b</sup>  | 12.9  | 11.7    | 12.9  | 13.9  | 12.0    | 13.7  |
| 50.zt Propene                    | 4.9 <sup>b</sup>   | 5.5   | 3.1     | 4.9   | 5.6   | 1.8     | 5.0   |
| 51.zt 1-Butene                   | -0.2 <sup>b</sup>  | 0.1   | -3.8    | 0.2   | 0.3   | -5.7    | 0.3   |
| 52.zt 1-Pentene                  | -5.3 <sup>b</sup>  | -4.6  | -9.9    | -4.7  | -4.6  | -12.8   | -4.8  |
| 53.zt 1-Hexene                   | -9.9 <sup>b</sup>  | -9.1  | -16.0   | -9.4  | -9.4  | -19.9   | -9.9  |
| 54.zt 1-Heptene                  | -14.8 <sup>b</sup> | -13.7 | -22.1   | -14.2 | -14.2 | -27.0   | -14.9 |
| 55.zt 1-Octene                   | -19.4 <sup>b</sup> | -18.3 | -28.2   | -18.9 | -19.1 | -34.0   | -20.0 |
| 56.zt 1-Nonene                   | -25.0 <sup>e</sup> | -22.8 | -34.2   | -23.7 | -23.9 | -41.1   | -25.1 |
| 57.zt 1-Decene                   | -29.8 <sup>f</sup> | -27.4 | -40.3   | -28.4 | -28.7 | -48.2   | -30.2 |
| 58.zt trans-2-Butene             | -3.0 <sup>b</sup>  | -3.8  | -7.5    | -3.7  | -4.0  | -9.8    | -3.9  |
| 59.zt cis-2-Butene               | -1.9 <sup>b</sup>  | -1.9  | -5.8    | -2.0  | -2.2  | -8.2    | -2.3  |
| 60.zt cis-2-Pentene              | -7.0 <sup>b</sup>  | -6.9  | -12.4   | -7.1  | -7.2  | -15.6   | -7.3  |
| 61.zt trans-2-Pentene            | -7.9 <sup>b</sup>  | -8.3  | -13.5   | -8.3  | -8.6  | -16.6   | -8.6  |
| 62.zt cis-2-Hexene               | -12.5 <sup>b</sup> | -11.6 | -18.2   | -11.1 | -12.1 | -22.3   | -11.6 |

... continued on next page ...

Table S69: ... continued from previous page ...

| Species                            | Ref.               | OM2   | OM2-D3T | ODM2  | OM3   | OM3-D3T | ODM3  |
|------------------------------------|--------------------|-------|---------|-------|-------|---------|-------|
| 63.zt trans-2-Hexene               | -12.9 <sup>b</sup> | -13.0 | -19.7   | -13.1 | -13.5 | -23.7   | -13.8 |
| 64.zt cis-3-Hexene                 | -11.4 <sup>b</sup> | -11.0 | -17.9   | -11.3 | -11.3 | -21.9   | -11.7 |
| 65.zt trans-3-Hexene               | -13.0 <sup>b</sup> | -12.8 | -19.5   | -12.9 | -13.2 | -23.4   | -13.3 |
| 66.zt 2-Methylpropene              | -4.3 <sup>b</sup>  | -3.1  | -7.0    | -3.9  | -2.9  | -9.0    | -3.8  |
| 67.zt 2-Methyl-2-butene            | -10.1 <sup>b</sup> | -11.6 | -17.2   | -11.5 | -11.4 | -19.9   | -11.3 |
| 68.zt 2-Methyl-1-butene            | -8.6 <sup>b</sup>  | -8.7  | -14.3   | -8.4  | -8.2  | -16.8   | -8.0  |
| 69.zt 3-Methyl-1-butene            | -6.6 <sup>b</sup>  | -6.5  | -12.2   | -6.9  | -5.6  | -14.2   | -6.1  |
| 70.zt 2,3-Dimethyl-2-butene        | -16.4 <sup>b</sup> | -19.8 | -27.2   | -19.7 | -18.9 | -30.2   | -18.9 |
| 71.zt 2,3-Dimethyl-1-butene        | -15.2 <sup>b</sup> | -14.8 | -22.3   | -14.9 | -13.5 | -25.0   | -13.9 |
| 72.zt 2-Methyl-1-pentene           | -14.2 <sup>b</sup> | -13.4 | -20.6   | -13.4 | -13.1 | -23.9   | -13.2 |
| 73.zt 3-Methyl-1-pentene           | -11.8 <sup>b</sup> | -9.3  | -16.9   | -9.7  | -8.4  | -19.8   | -9.0  |
| 74.zt 4-Methyl-1-pentene           | -12.2 <sup>b</sup> | -10.4 | -17.7   | -10.9 | -9.8  | -20.8   | -10.6 |
| 75.zt 2-Methyl-2-pentene           | -16.0 <sup>b</sup> | -15.7 | -22.9   | -15.5 | -15.6 | -26.5   | -15.4 |
| 76.zt cis-3-Methyl-2-pentene       | -14.9 <sup>b</sup> | -15.8 | -23.2   | -15.8 | -15.5 | -26.7   | -15.6 |
| 77.zt trans-3-Methyl-2-pentene     | -15.1 <sup>b</sup> | -16.0 | -23.3   | -16.0 | -15.7 | -26.8   | -15.8 |
| 78.zt cis-4-Methyl-2-pentene       | -13.7 <sup>b</sup> | -13.1 | -19.9   | -13.4 | -12.7 | -23.8   | -13.1 |
| 79.zt trans-4-Methyl-2-pentene     | -14.7 <sup>b</sup> | -13.5 | -20.7   | -13.7 | -13.0 | -23.9   | -13.4 |
| 80.zt 2-Ethyl-1-butene             | -13.4 <sup>b</sup> | -13.2 | -20.5   | -13.0 | -12.4 | -23.5   | -12.4 |
| 81.zt 3,3-Dimethyl-1-butene        | -14.5 <sup>b</sup> | -13.1 | -20.9   | -14.3 | -10.6 | -22.3   | -12.1 |
| 82.zt 5-Methyl-1-hexene            | -15.7 <sup>b</sup> | -14.9 | -23.8   | -15.7 | -14.6 | -27.9   | -15.7 |
| 83.zt 3-Methyl-trans-3-hexene      | -18.4 <sup>b</sup> | -20.7 | -29.5   | -21.0 | -20.6 | -33.9   | -20.9 |
| 84.zt 3-Methyl-cis-3-hexene        | -19.0 <sup>b</sup> | -20.5 | -29.4   | -20.7 | -20.3 | -33.7   | -20.6 |
| 85.zt 2,4-Dimethyl-1-pentene       | -20.0 <sup>b</sup> | -19.2 | -28.6   | -19.9 | -18.3 | -32.3   | -19.2 |
| 86.zt 4,4-Dimethyl-1-pentene       | -19.4 <sup>b</sup> | -17.9 | -27.7   | -19.2 | -15.7 | -30.2   | -17.5 |
| 87.zt 2,4-Dimethyl-2-pentene       | -21.2 <sup>b</sup> | -22.4 | -31.4   | -22.8 | -21.6 | -35.1   | -22.1 |
| 88.zt 4,4-Dimethyl-trans-2-pentene | -21.2 <sup>b</sup> | -21.7 | -31.0   | -22.6 | -19.6 | -33.6   | -20.9 |
| 89.zt 4,4-Dimethyl-cis-2-pentene   | -17.4 <sup>b</sup> | -18.0 | -27.7   | -18.6 | -15.9 | -30.4   | -16.9 |
| 90.zt 3-Methyl-2-ethyl-1-butene    | -19.0 <sup>b</sup> | -19.2 | -28.7   | -19.6 | -17.7 | -31.9   | -18.4 |
| 91.zt 2,3,3-Trimethyl-1-butene     | -20.4 <sup>b</sup> | -21.4 | -31.3   | -22.0 | -18.1 | -32.9   | -19.1 |
| 92.zt 2,2-Dimethyl-cis-3-hexene    | -21.3 <sup>b</sup> | -22.7 | -34.0   | -23.6 | -20.6 | -37.5   | -21.9 |
| 93.zt 2,2-Dimethyl-trans-3-hexene  | -25.7 <sup>b</sup> | -26.3 | -37.1   | -27.3 | -24.2 | -40.5   | -25.7 |
| 94.zt 2-Methyl-3-ethyl-1-pentene   | -24.0 <sup>b</sup> | -23.6 | -35.2   | -24.6 | -22.2 | -39.4   | -23.7 |
| 95.zt 2,4,4-Trimethyl-1-pentene    | -26.4 <sup>b</sup> | -25.8 | -37.7   | -27.1 | -23.2 | -40.7   | -25.1 |
| 96.zt 2,4,4-Trimethyl-2-pentene    | -25.1 <sup>b</sup> | -27.2 | -38.7   | -28.0 | -24.6 | -41.7   | -25.8 |
| 97.zt Allene                       | 45.6 <sup>b</sup>  | 45.9  | 44.3    | 45.7  | 45.5  | 42.9    | 45.7  |
| 98.zt 1,2-Butadiene                | 38.8 <sup>b</sup>  | 38.1  | 35.2    | 38.1  | 37.6  | 33.0    | 38.0  |
| 99.zt 1,2-Pentadiene               | 33.6 <sup>b</sup>  | 33.3  | 29.0    | 33.2  | 32.8  | 26.0    | 33.1  |
| 100.zt 2,3-Pentadiene              | 31.8 <sup>b</sup>  | 30.4  | 26.2    | 30.5  | 29.5  | 23.0    | 30.2  |
| 101.zt 3-Methyl-1,2-butadiene      | 30.9 <sup>g</sup>  | 29.4  | 24.9    | 29.5  | 29.3  | 22.4    | 29.9  |
| 102.zt trans-Dimethyl butatriene   | 63.3 <sup>h</sup>  | 64.2  | 59.5    | 63.8  | 62.4  | 55.1    | 63.3  |
| 103.zt 1,3-Butadiene               | 26.1 <sup>b</sup>  | 29.4  | 26.3    | 29.3  | 30.3  | 25.5    | 29.8  |
| 104.zt 1, trans-3-Pentadiene       | 18.1 <sup>b</sup>  | 20.5  | 16.1    | 20.4  | 20.9  | 14.0    | 20.4  |
| 105.zt 1, cis-3-Pentadiene         | 19.1 <sup>b</sup>  | 21.4  | 16.9    | 21.5  | 21.8  | 14.7    | 21.4  |
| 106.zt 1,4-Pentadiene              | 25.2 <sup>b</sup>  | 26.0  | 21.4    | 25.8  | 26.3  | 19.3    | 25.5  |
| 107.zt cis-1,3,5-Hexatriene        | 41.1 <sup>i</sup>  | 44.8  | 39.7    | 44.5  | 45.8  | 37.9    | 44.7  |
| 108.zt 1,5-Hexadiene               | 20.1 <sup>b</sup>  | 21.0  | 14.9    | 20.6  | 21.2  | 11.9    | 20.2  |
| 109.zt Isoprene                    | 18.1 <sup>b</sup>  | 21.4  | 16.6    | 21.7  | 22.6  | 15.2    | 21.9  |
| 110.zt 2,3-Dimethyl-1,3-butadiene  | 10.8 <sup>b</sup>  | 12.6  | 6.0     | 12.8  | 13.9  | 4.0     | 13.7  |
| 111.zt 4-Methyl-1,3-pentadiene     | 11.4 <sup>j</sup>  | 12.6  | 6.4     | 12.8  | 13.3  | 3.8     | 13.1  |
| 112.zt Acetylene                   | 54.3 <sup>b</sup>  | 54.2  | 53.6    | 53.9  | 54.7  | 53.7    | 54.2  |
| 113.zt Propyne                     | 44.4 <sup>b</sup>  | 44.5  | 42.9    | 44.3  | 44.1  | 41.5    | 44.3  |
| 114.zt 1-Butyne                    | 39.5 <sup>b</sup>  | 39.5  | 36.5    | 39.3  | 39.2  | 34.6    | 39.5  |
| 115.zt 1-Pentyne                   | 34.4 <sup>k</sup>  | 34.6  | 30.1    | 34.3  | 34.2  | 27.4    | 34.4  |
| 116.zt 1-Hexyne                    | 29.2 <sup>k</sup>  | 30.0  | 24.1    | 29.5  | 29.4  | 20.3    | 29.4  |
| 117.zt 1-Heptyne                   | 24.8 <sup>k</sup>  | 25.5  | 18.0    | 24.8  | 24.6  | 13.3    | 24.3  |
| 118.zt 1-Octyne                    | 19.3 <sup>k</sup>  | 20.9  | 11.9    | 20.0  | 19.8  | 6.2     | 19.2  |
| 119.zt 1-Nonyne                    | 14.9 <sup>k</sup>  | 16.3  | 5.8     | 15.3  | 14.9  | -0.9    | 14.2  |
| 120.zt 1-Decyne                    | 10.0 <sup>f</sup>  | 11.8  | -0.2    | 10.5  | 10.1  | -8.0    | 9.1   |
| 121.zt 2-Butyne                    | 34.7 <sup>b</sup>  | 35.1  | 32.4    | 35.1  | 33.8  | 29.6    | 34.6  |
| 122.zt 2-Pentyne                   | 30.7 <sup>k</sup>  | 30.0  | 26.0    | 30.1  | 28.9  | 22.6    | 29.9  |
| 123.zt 2-Hexyne                    | 25.7 <sup>k</sup>  | 25.1  | 19.6    | 24.4  | 23.9  | 15.4    | 24.1  |
| 124.zt 3-Hexyne                    | 25.2 <sup>k</sup>  | 25.0  | 19.5    | 24.6  | 24.0  | 15.6    | 25.1  |
| 125.zt 3-Methyl-1-butyne           | 32.6 <sup>d</sup>  | 32.4  | 27.8    | 32.0  | 32.9  | 25.8    | 33.0  |

... continued on next page ...

Table S69: ... continued from previous page ...

| Species                                  | Ref.               | OM2   | OM2-D3T | ODM2  | OM3   | OM3-D3T | ODM3  |
|------------------------------------------|--------------------|-------|---------|-------|-------|---------|-------|
| 126.zt 3,3-Dimethylbutyne                | 25.6 <sup>l</sup>  | 23.8  | 17.2    | 23.1  | 25.9  | 16.0    | 25.5  |
| 127.zt 2-Heptyne                         | 20.3 <sup>m</sup>  | 20.6  | 13.6    | 19.7  | 19.1  | 8.3     | 19.1  |
| 128.zt 1,3-Butadiyne                     | 113.0 <sup>d</sup> | 118.0 | 116.6   | 116.8 | 116.1 | 113.7   | 115.9 |
| 129.zt 3-Heptyne                         | 19.8 <sup>m</sup>  | 20.1  | 13.1    | 20.0  | 18.9  | 8.3     | 19.9  |
| 130.zt 2-Octyne                          | 15.2 <sup>m</sup>  | 16.0  | 7.5     | 15.0  | 14.2  | 1.3     | 14.0  |
| 131.zt 3-Octyne                          | 14.9 <sup>m</sup>  | 15.6  | 7.1     | 15.3  | 14.1  | 1.3     | 14.8  |
| 132.zt 4-Octyne                          | 14.4 <sup>m</sup>  | 15.2  | 6.7     | 15.0  | 13.9  | 1.1     | 14.7  |
| 133.zt 1-Buten-3-yne                     | 72.8 <sup>d</sup>  | 71.2  | 69.0    | 70.7  | 71.2  | 67.6    | 70.9  |
| 134.zt 1-Pentyne-cis-3-ene               | 61.1 <sup>n</sup>  | 62.7  | 58.9    | 62.4  | 62.3  | 56.4    | 62.3  |
| 135.zt 1-Pentyne-trans-3-ene             | 61.4 <sup>n</sup>  | 61.8  | 58.2    | 61.3  | 61.5  | 55.9    | 61.3  |
| 136.zt 3-Methyl-1-butyne-3-ene           | 61.8 <sup>o</sup>  | 61.8  | 58.1    | 61.6  | 62.1  | 56.3    | 62.2  |
| 137.zt Benzene                           | 19.8 <sup>b</sup>  | 18.8  | 13.8    | 19.7  | 18.5  | 10.6    | 18.9  |
| 138.zt Naphthalene                       | 36.0 <sup>b</sup>  | 34.8  | 25.3    | 35.8  | 35.7  | 21.0    | 35.7  |
| 139.zt Anthracene                        | 55.2 <sup>b</sup>  | 55.5  | 41.4    | 56.4  | 57.5  | 35.8    | 57.0  |
| 140.zt Biphenyl                          | 43.5 <sup>b</sup>  | 39.0  | 27.0    | 40.1  | 40.2  | 21.9    | 40.1  |
| 141.zt Azulene                           | 73.5 <sup>b</sup>  | 83.4  | 74.0    | 82.7  | 82.5  | 68.1    | 81.6  |
| 142.zt Indene                            | 39.1 <sup>b</sup>  | 37.5  | 29.1    | 38.2  | 37.5  | 24.4    | 37.3  |
| 143.zt Biphenylene                       | 100.5 <sup>f</sup> | 103.7 | 93.3    | 105.4 | 103.2 | 87.1    | 104.4 |
| 144.zt Toluene                           | 12.0 <sup>b</sup>  | 9.5   | 2.9     | 9.7   | 9.6   | -0.6    | 9.9   |
| 145.zt Ethylbenzene                      | 7.2 <sup>b</sup>   | 4.8   | -3.5    | 5.4   | 5.0   | -7.7    | 5.1   |
| 146.zt Styrene                           | 35.3 <sup>b</sup>  | 34.7  | 27.3    | 35.4  | 35.8  | 24.1    | 35.4  |
| 147.zt Phenylacetylene                   | 78.2 <sup>d</sup>  | 75.3  | 69.0    | 75.6  | 75.6  | 65.7    | 75.9  |
| 148.zt Cumene                            | 0.9 <sup>d</sup>   | -1.5  | -11.8   | -1.2  | -0.5  | -16.1   | -0.9  |
| 149.zt n-Propylbenzene                   | 1.9 <sup>d</sup>   | 0.1   | -9.8    | 0.5   | 0.1   | -14.9   | -0.1  |
| 150.zt a-Methylstyrene                   | 27.0 <sup>d</sup>  | 25.8  | 16.5    | 26.5  | 27.1  | 13.0    | 27.0  |
| 151.zt b-cis-Methylstyrene               | 29.0 <sup>d</sup>  | 27.7  | 18.4    | 28.2  | 28.1  | 14.0    | 27.8  |
| 152.zt b-trans-Methylstyrene             | 28.0 <sup>d</sup>  | 25.9  | 17.1    | 26.5  | 26.4  | 12.8    | 26.1  |
| 153.zt o-Xylene                          | 4.6 <sup>b</sup>   | 0.3   | -8.1    | 0.9   | 1.3   | -11.7   | 1.4   |
| 154.zt m-Xylene                          | 4.1 <sup>b</sup>   | 0.2   | -7.9    | -0.3  | 0.7   | -11.9   | 0.9   |
| 155.zt p-Xylene                          | 4.3 <sup>b</sup>   | 0.3   | -7.8    | 0.9   | 0.8   | -11.8   | -0.2  |
| 156.zt 1-Methyl-2-ethylbenzene           | 0.4 <sup>b</sup>   | -3.7  | -14.0   | -3.2  | -2.5  | -18.3   | -2.7  |
| 157.zt 1-Methyl-3-ethylbenzene           | -0.4 <sup>b</sup>  | -4.5  | -14.4   | -4.6  | -3.9  | -19.0   | -3.9  |
| 158.zt 1-Methyl-4-ethylbenzene           | -0.8 <sup>b</sup>  | -4.4  | -14.3   | -4.5  | -3.8  | -18.9   | -3.8  |
| 159.zt 1,2,4-Trimethylbenzene            | -3.3 <sup>b</sup>  | -8.8  | -18.9   | -9.0  | -7.5  | -22.9   | -7.6  |
| 160.zt 1,2,3-Trimethylbenzene            | -2.3 <sup>b</sup>  | -7.6  | -17.9   | -7.0  | -5.8  | -21.6   | -5.7  |
| 161.zt Mesitylene                        | -3.8 <sup>b</sup>  | -9.0  | -18.8   | -9.8  | -8.1  | -23.1   | -8.7  |
| 162.zt Indane                            | 14.4 <sup>b</sup>  | 9.9   | 0.3     | 10.3  | 9.3   | -5.1    | 9.6   |
| 163.zt Cyclopropane                      | 12.7 <sup>b</sup>  | 9.9   | 7.6     | 10.7  | 10.1  | 6.3     | 11.9  |
| 164.zt Cyclobutane                       | 6.8 <sup>b</sup>   | 3.0   | -1.0    | 2.4   | 2.9   | -3.3    | 3.3   |
| 165.zt Cyclopentane                      | -18.4 <sup>b</sup> | -19.7 | -25.5   | -19.9 | -20.8 | -29.8   | -20.3 |
| 166.zt Cyclohexane                       | -29.5 <sup>b</sup> | -27.0 | -34.9   | -27.2 | -28.4 | -40.5   | -28.4 |
| 167.zt Cycloheptane                      | -28.2 <sup>b</sup> | -23.7 | -33.7   | -24.1 | -26.4 | -41.5   | -26.6 |
| 168.zt Cyclooctane                       | -29.7 <sup>b</sup> | -23.8 | -35.8   | -25.0 | -27.8 | -45.6   | -29.0 |
| 169.zt Cyclononane                       | -31.7 <sup>b</sup> | -25.6 | -39.9   | -27.1 | -29.3 | -50.4   | -31.1 |
| 170.zt Methylcyclopropane                | 5.5 <sup>e</sup>   | 4.9   | 1.0     | 5.4   | 4.6   | -1.4    | 6.0   |
| 171.zt Methylcyclopentane                | -25.3 <sup>b</sup> | -26.7 | -34.4   | -26.8 | -27.5 | -39.1   | -27.0 |
| 172.zt ax-Methylcyclohexane              | -35.2 <sup>p</sup> | -32.2 | -42.2   | -32.6 | -33.0 | -48.1   | -33.4 |
| 173.zt Ethylcyclopropane                 | 1.1 <sup>q</sup>   | 0.1   | -5.3    | 0.5   | -0.3  | -8.6    | 0.9   |
| 174.zt Ethylcyclopentane                 | -30.3 <sup>b</sup> | -31.1 | -40.5   | -31.4 | -32.0 | -46.1   | -31.8 |
| 175.zt Propylcyclopentane                | -35.4 <sup>b</sup> | -35.7 | -46.6   | -36.2 | -36.8 | -53.2   | -36.9 |
| 176.zt Butylcyclopentane                 | -40.2 <sup>d</sup> | -40.2 | -52.7   | -40.9 | -41.6 | -60.3   | -42.0 |
| 177.zt Ethylcyclohexane                  | -41.0 <sup>b</sup> | -38.0 | -49.5   | -38.9 | -38.9 | -56.2   | -40.0 |
| 178.zt n-Propylcyclohexane               | -46.2 <sup>b</sup> | -41.4 | -54.7   | -42.5 | -42.5 | -62.4   | -43.7 |
| 179.zt Methylenecyclopropane             | 47.9 <sup>b</sup>  | 45.0  | 42.0    | 45.4  | 43.7  | 39.1    | 44.7  |
| 180.zt Methylenecyclobutane              | 29.1 <sup>c</sup>  | 25.4  | 20.8    | 24.9  | 25.6  | 18.3    | 25.5  |
| 181.zt Methylenecyclopentane             | 3.0 <sup>c</sup>   | -1.3  | -8.0    | -1.2  | -1.9  | -12.0   | -1.6  |
| 182.zt 1,2,3-Trimethylenecyclopropane    | 94.6 <sup>r</sup>  | 112.4 | 108.2   | 112.9 | 109.5 | 102.9   | 109.8 |
| 183.zt 1,2-Dimethylenecyclobutane        | 48.8 <sup>h</sup>  | 48.2  | 42.8    | 47.9  | 48.9  | 40.5    | 48.7  |
| 184.zt 3-(2-Propylidenen)-1,4-pentadiene | 30.9 <sup>h</sup>  | 30.7  | 21.3    | 30.3  | 33.1  | 19.0    | 31.9  |
| 185.zt cis-1,2-Dimethylcyclopropane      | 1.3 <sup>k</sup>   | 0.6   | -5.0    | 1.1   | 0.1   | -8.4    | 1.1   |
| 186.zt Ethylcyclobutane                  | -6.3 <sup>h</sup>  | -8.8  | -16.1   | -9.8  | -8.8  | -19.9   | -9.0  |
| 187.zt cis-1,2-Dimethylcyclopentane      | -30.9 <sup>b</sup> | -31.7 | -41.6   | -32.1 | -31.9 | -46.6   | -31.8 |
| 188.zt trans-1,2-Dimethylcyclopentane    | -32.7 <sup>b</sup> | -33.7 | -43.3   | -34.9 | -34.0 | -48.3   | -34.4 |

... continued on next page ...

Table S69: ... continued from previous page ...

| Species                                      | Ref.               | OM2   | OM2-D3T | ODM2  | OM3   | OM3-D3T | ODM3  |
|----------------------------------------------|--------------------|-------|---------|-------|-------|---------|-------|
| 189.zt cis-1,3-Dimethylcyclopentane          | -32.5 <sup>b</sup> | -33.7 | -43.1   | -34.2 | -34.1 | -48.2   | -34.8 |
| 190.zt trans-1,3-Dimethylcyclopentane        | -31.9 <sup>b</sup> | -33.8 | -43.2   | -34.3 | -34.1 | -48.3   | -34.3 |
| 191.zt cis-1,2-Dimethylcyclohexane           | -41.1 <sup>b</sup> | -38.2 | -50.3   | -39.1 | -38.1 | -56.3   | -39.3 |
| 192.zt trans-1,2-Dimethylcyclohexane         | -43.0 <sup>b</sup> | -40.0 | -51.8   | -41.3 | -40.0 | -57.7   | -41.5 |
| 193.zt cis-1,3-Dimethylcyclohexane           | -44.1 <sup>b</sup> | -40.7 | -52.4   | -42.1 | -41.1 | -58.5   | -42.6 |
| 194.zt trans-1,3-Dimethylcyclohexane         | -42.2 <sup>b</sup> | -39.0 | -50.9   | -40.1 | -39.2 | -57.0   | -40.5 |
| 195.zt cis-1,4-Dimethylcyclohexane           | -42.2 <sup>b</sup> | -39.0 | -51.0   | -40.1 | -39.3 | -57.1   | -40.5 |
| 196.zt trans-1,4-Dimethylcyclohexane         | -44.1 <sup>b</sup> | -40.8 | -52.4   | -42.2 | -41.1 | -58.5   | -42.6 |
| 197.zt cis-cis-1,3,5- Trimethylcyclohexane   | -50.7 <sup>b</sup> | -47.5 | -61.0   | -49.6 | -47.3 | -67.4   | -49.7 |
| 198.zt cis-trans-1,3,5- Trimethylcyclohexane | -49.4 <sup>d</sup> | -45.8 | -59.6   | -47.5 | -45.4 | -66.0   | -47.5 |
| 199.zt 1,1-Dimethylcyclopropane              | -2.0 <sup>s</sup>  | -1.8  | -7.3    | -1.3  | -1.6  | -10.2   | -0.8  |
| 200.zt 1,1-Dimethylcyclopentane              | -33.0 <sup>b</sup> | -35.1 | -44.9   | -35.8 | -34.4 | -49.1   | -34.8 |
| 201.zt 1,1-Dimethylcyclohexane               | -43.2 <sup>b</sup> | -40.5 | -52.7   | -41.7 | -39.6 | -57.8   | -41.1 |
| 202.zt Vinylcyclopropane                     | 30.4 <sup>h</sup>  | 29.8  | 25.3    | 30.2  | 30.1  | 23.1    | 31.0  |
| 203.zt 1,3-Cycloheptadiene                   | 22.6 <sup>b</sup>  | 27.0  | 19.1    | 27.2  | 24.8  | 12.8    | 24.9  |
| 204.zt Cyclooctatetraene                     | 71.1 <sup>b</sup>  | 75.2  | 67.2    | 74.3  | 73.9  | 61.6    | 72.1  |
| 205.zt Cyclopropene                          | 66.2 <sup>b</sup>  | 67.4  | 65.7    | 66.9  | 65.5  | 62.8    | 65.6  |
| 206.zt Cyclobutene                           | 37.5 <sup>b</sup>  | 41.3  | 38.2    | 40.2  | 40.8  | 35.8    | 40.0  |
| 207.zt Cyclopentene                          | 8.2 <sup>b</sup>   | 6.8   | 1.9     | 7.0   | 5.7   | -2.0    | 6.0   |
| 208.zt Cyclohexene                           | -1.1 <sup>b</sup>  | 0.4   | -6.4    | 0.6   | -1.1  | -11.6   | -0.9  |
| 209.zt Cyclooctene                           | -6.5 <sup>b</sup>  | 2.0   | -9.2    | 1.5   | -0.8  | -17.6   | -1.4  |
| 210.zt 1-Methylcyclopropene                  | 58.2 <sup>b</sup>  | 59.6  | 56.7    | 59.7  | 57.1  | 52.6    | 57.7  |
| 211.zt 1,2-Dimethylcyclopropene              | 46.4 <sup>k</sup>  | 51.8  | 47.7    | 52.5  | 48.9  | 42.5    | 49.9  |
| 212.zt cis-1-Methyl-2- vinylcyclopropane     | 24.6 <sup>h</sup>  | 25.4  | 19.1    | 25.6  | 25.4  | 15.9    | 25.8  |
| 213.zt 3,4-Dimethylenecyclobutene            | 80.4 <sup>h</sup>  | 90.8  | 86.4    | 90.9  | 90.6  | 83.7    | 90.6  |
| 214.zt 1,2,3,4,5-Pentamethyl cyclopentadiene | -5.9 <sup>h</sup>  | -10.3 | -23.4   | -11.4 | -8.7  | -28.2   | -9.2  |
| 215.zt 1-Methylcyclopentene                  | -0.6 <sup>b</sup>  | -2.9  | -9.3    | -2.6  | -3.7  | -13.7   | -3.3  |
| 216.zt 3-Methylcyclopentene                  | 2.0 <sup>b</sup>   | -0.2  | -6.8    | -0.3  | -0.7  | -10.9   | -0.9  |
| 217.zt 4-Methylcyclopentene                  | 3.5 <sup>b</sup>   | -0.4  | -7.1    | -0.6  | -1.1  | -11.3   | -1.3  |
| 218.zt 1-Ethylcyclohexene                    | -15.2 <sup>b</sup> | -13.6 | -23.9   | -13.7 | -14.5 | -30.0   | -14.7 |
| 219.zt 1,3,5-Cycloheptatriene                | 43.9 <sup>b</sup>  | 46.7  | 39.8    | 46.7  | 46.1  | 35.4    | 45.8  |
| 220.zt 1,3-Cyclopentadiene                   | 31.9 <sup>b</sup>  | 33.3  | 29.3    | 33.5  | 32.6  | 26.2    | 32.2  |
| 221.zt Fulvene                               | 53.6 <sup>h</sup>  | 56.9  | 52.1    | 57.3  | 57.4  | 49.9    | 56.9  |
| 222.zt 1,3-Cyclohexadiene                    | 25.4 <sup>b</sup>  | 25.9  | 20.0    | 26.5  | 24.8  | 15.6    | 24.9  |
| 223.zt Bullvalene                            | 79.8 <sup>f</sup>  | 84.5  | 73.3    | 85.5  | 83.5  | 66.5    | 84.3  |
| 224.zt Bicyclobutane                         | 51.9 <sup>b</sup>  | 62.0  | 59.0    | 61.7  | 59.9  | 55.2    | 61.4  |
| 225.zt Spiropentane                          | 44.2 <sup>b</sup>  | 42.8  | 38.4    | 43.6  | 41.0  | 34.3    | 42.7  |
| 226.zt Bicyclopropyl                         | 30.9 <sup>b</sup>  | 30.5  | 24.4    | 31.1  | 30.1  | 20.7    | 32.2  |
| 227.zt Bicyclo[2.1.0]pentane                 | 37.3 <sup>k</sup>  | 40.1  | 35.4    | 39.5  | 39.0  | 31.6    | 39.3  |
| 228.zt Norbornane                            | -12.4 <sup>q</sup> | -12.5 | -21.5   | -13.3 | -12.4 | -26.3   | -13.2 |
| 229.zt Norbornadiene                         | 58.6 <sup>c</sup>  | 51.8  | 44.9    | 51.5  | 52.1  | 41.1    | 50.7  |
| 230.zt Bicyclo[2.2.2]octane                  | -23.6 <sup>c</sup> | -22.0 | -33.3   | -22.1 | -23.3 | -40.4   | -23.3 |
| 231.zt 1,4-Dimethylnorbornane                | -30.6 <sup>t</sup> | -29.9 | -43.1   | -31.6 | -27.9 | -47.5   | -29.9 |
| 232.zt 2,3-Dimethylnorbornane                | -25.7 <sup>t</sup> | -25.2 | -38.5   | -27.0 | -24.1 | -43.9   | -26.2 |
| 233.zt Bicyclo[2.2.0]hexane                  | 29.8 <sup>u</sup>  | 24.6  | 17.9    | 22.8  | 24.7  | 14.5    | 24.0  |
| 234.zt cis-Bicyclo[4.2.0]octane              | -6.4 <sup>b</sup>  | -5.0  | -15.8   | -6.2  | -6.1  | -22.4   | -6.7  |
| 235.zt cis-Bicyclo[3.3.0]octane              | -22.2 <sup>c</sup> | -26.1 | -36.8   | -26.5 | -27.1 | -43.2   | -27.0 |
| 236.zt trans-Bicyclo[3.3.0]octane            | -15.9 <sup>c</sup> | -14.1 | -24.8   | -15.1 | -15.5 | -31.6   | -16.1 |
| 237.zt cis-Bicyclo[4.3.0]nonane              | -30.4 <sup>b</sup> | -29.1 | -42.3   | -30.0 | -30.4 | -50.1   | -31.1 |
| 238.zt trans-Bicyclo[4.3.0]nonane            | -31.4 <sup>b</sup> | -25.3 | -38.2   | -26.1 | -26.8 | -46.1   | -27.4 |
| 239.zt cis-Bicyclo[4.4.0]decane              | -40.4 <sup>c</sup> | -35.9 | -51.5   | -37.4 | -37.0 | -60.2   | -39.0 |
| 240.zt trans-Bicyclo[4.4.0]decane            | -43.5 <sup>c</sup> | -38.5 | -53.6   | -40.5 | -39.8 | -62.3   | -42.3 |
| 241.zt Cubane                                | 148.7 <sup>b</sup> | 144.6 | 137.2   | 141.2 | 146.4 | 134.8   | 144.1 |
| 242.zt Adamantane                            | -31.9 <sup>c</sup> | -30.4 | -45.6   | -31.5 | -30.2 | -53.1   | -32.0 |
| 243.zt Diamantane                            | -34.9 <sup>v</sup> | -35.3 | -58.3   | -38.1 | -33.5 | -67.6   | -37.8 |
| 244.zt Bicyclo[3.1.0]hexane                  | 9.1 <sup>b</sup>   | 8.9   | 2.3     | 9.5   | 7.6   | -2.6    | 8.8   |
| 245.zt Bicyclo[4.1.0]heptane                 | 0.3 <sup>b</sup>   | 4.3   | -4.4    | 4.7   | 2.4   | -10.9   | 3.2   |
| 246.zt Bicyclo[5.1.0]octane                  | -3.9 <sup>b</sup>  | 5.5   | -5.4    | 5.5   | 2.9   | -13.4   | 3.3   |
| 247.zt Bicyclo[6.1.0]nonane                  | -7.4 <sup>b</sup>  | 5.1   | -8.0    | 4.6   | 1.9   | -17.6   | 1.7   |
| 248.zt Bicyclo[1.1.1]pentane                 | 49.6 <sup>u</sup>  | 63.5  | 58.7    | 60.6  | 61.2  | 53.7    | 59.8  |
| 249.zt Bicyclo[2.1.1]hexane                  | 15.3 <sup>u</sup>  | 20.5  | 13.6    | 18.6  | 20.1  | 9.4     | 18.8  |
| 250.zt Cyclodecane                           | -36.9 <sup>c</sup> | -28.5 | -45.0   | -30.3 | -32.2 | -56.5   | -34.7 |
| 251.zt Cyclododecane                         | -54.6 <sup>c</sup> | -39.8 | -60.4   | -43.0 | -43.4 | -73.3   | -47.4 |

... continued on next page ...

Table S69: ... continued from previous page ...

| Species                        | Ref.               | OM2   | OM2-D3T | ODM2  | OM3   | OM3-D3T | ODM3  |
|--------------------------------|--------------------|-------|---------|-------|-------|---------|-------|
| 252.zt eq-Methylcyclohexane    | -37.0 <sup>c</sup> | -33.9 | -43.7   | -34.7 | -34.8 | -49.5   | -35.6 |
| 253.zt Protoadamantane         | -20.5 <sup>c</sup> | -21.1 | -36.3   | -22.2 | -21.2 | -43.9   | -22.7 |
| 254.zt tri-tert-Butylmethane   | -56.2 <sup>w</sup> | -49.7 | -75.9   | -52.6 | -41.3 | -79.2   | -46.1 |
| b01.zt Nitrogen                | 0.0 <sup>a</sup>   | 2.8   | 2.6     | 1.5   | 2.6   | 2.2     | 4.6   |
| b02.zt Ammonia                 | -11.0 <sup>f</sup> | -5.9  | -6.3    | -12.0 | -11.2 | -12.0   | -11.3 |
| b03.zt Methylamine             | -5.5 <sup>b</sup>  | -4.1  | -5.6    | -6.3  | -5.8  | -8.1    | -5.6  |
| b04.zt Ethylamine              | -11.3 <sup>b</sup> | -8.6  | -11.3   | -11.9 | -11.1 | -15.5   | -11.3 |
| b05.zt n-Propylamine           | -16.8 <sup>b</sup> | -13.5 | -17.7   | -16.9 | -16.1 | -22.7   | -16.5 |
| b06.zt n-Butylamine            | -22.7 <sup>c</sup> | -18.0 | -23.7   | -21.6 | -20.9 | -29.7   | -21.5 |
| b07.zt Dimethylamine           | -4.4 <sup>b</sup>  | -5.1  | -7.9    | -4.2  | -2.2  | -6.5    | -3.2  |
| b08.zt Trimethylamine          | -5.7 <sup>c</sup>  | -8.0  | -12.4   | -4.5  | -0.1  | -6.7    | -2.9  |
| b09.zt Isopropylamine          | -20.0 <sup>c</sup> | -14.5 | -18.9   | -19.4 | -17.4 | -24.2   | -18.3 |
| b10.zt sec-Butylamine          | -25.4 <sup>c</sup> | -19.4 | -25.5   | -23.1 | -22.7 | -32.0   | -23.3 |
| b11.zt tert-Butylamine         | -28.9 <sup>c</sup> | -22.3 | -28.7   | -27.4 | -24.6 | -34.3   | -25.6 |
| b12.zt Diethylamine            | -17.3 <sup>c</sup> | -14.7 | -20.3   | -15.9 | -13.8 | -22.3   | -15.5 |
| b13.zt Triethylamine           | -22.1 <sup>c</sup> | -18.0 | -27.5   | -17.9 | -14.9 | -29.4   | -18.9 |
| b14.zt Diisopropylamine        | -34.4 <sup>e</sup> | -25.3 | -34.9   | -28.3 | -25.2 | -39.3   | -27.8 |
| b15.zt Hydrocyanic acid        | 32.3 <sup>y</sup>  | 26.1  | 25.7    | 25.5  | 25.3  | 24.7    | 25.4  |
| b16.zt Acetonitrile            | 17.7 <sup>z</sup>  | 17.5  | 16.2    | 17.3  | 15.3  | 13.2    | 15.3  |
| b17.zt Propionitrile           | 12.3 <sup>c</sup>  | 12.3  | 9.6     | 12.1  | 10.2  | 6.0     | 10.5  |
| b18.zt n-Propyl cyanide        | 8.1 <sup>c</sup>   | 7.5   | 3.3     | 7.1   | 5.3   | -1.1    | 5.4   |
| b19.zt Isopropyl cyanide       | 5.6 <sup>c</sup>   | 5.1   | 0.8     | 4.6   | 3.5   | -3.1    | 3.6   |
| b20.zt Cyanogen                | 73.3 <sup>c</sup>  | 74.8  | 73.9    | 76.2  | 68.2  | 66.7    | 70.5  |
| b21.zt Malononitrile           | 63.6 <sup>a1</sup> | 56.6  | 54.4    | 56.9  | 51.7  | 48.2    | 52.3  |
| b22.zt Acrylonitrile           | 43.2 <sup>c</sup>  | 45.6  | 43.6    | 45.3  | 43.7  | 40.5    | 43.6  |
| b23.zt E-2-Butenedinitrile     | 81.3 <sup>b</sup>  | 79.7  | 76.9    | 79.7  | 75.2  | 70.8    | 75.8  |
| b24.zt Tricyanoethylene        | 124.4 <sup>b</sup> | 119.1 | 115.1   | 120.1 | 111.4 | 105.4   | 113.5 |
| b25.zt Dicyanacetylene         | 127.5 <sup>y</sup> | 138.0 | 136.1   | 137.6 | 128.3 | 125.3   | 130.0 |
| b26.zt Hydrazine               | 22.8 <sup>y</sup>  | 18.5  | 17.4    | 17.6  | 16.5  | 14.7    | 17.2  |
| b27.zt Methylhydrazine         | 22.6 <sup>b</sup>  | 18.2  | 15.8    | 18.7  | 20.1  | 16.5    | 20.1  |
| b28.zt 1,2-Dimethylhydrazine   | 22.0 <sup>c</sup>  | 17.5  | 13.9    | 19.6  | 23.2  | 17.6    | 22.1  |
| b29.zt 1,1-Dimethylhydrazine   | 20.1 <sup>c</sup>  | 14.8  | 10.8    | 17.8  | 27.0  | 15.4    | 22.2  |
| b30.zt 2,3-Diazabutadiene      | 58.0 <sup>e</sup>  | 55.7  | 53.4    | 57.4  | 55.7  | 52.2    | 56.4  |
| b31.zt Tetramethyltetrazene    | 64.7 <sup>c</sup>  | 55.2  | 47.0    | 60.3  | 74.0  | 61.9    | 68.2  |
| b32.zt Azidomethylbenzene      | 99.5 <sup>f</sup>  | 91.3  | 82.7    | 94.2  | 93.0  | 80.0    | 92.8  |
| b33.zt Methyl azide            | 67.0 <sup>e</sup>  | 67.0  | 65.1    | 68.7  | 67.8  | 64.9    | 68.6  |
| b34.zt Isocyanomethane         | 39.1 <sup>c</sup>  | 38.3  | 36.9    | 37.6  | 26.7  | 24.4    | 21.8  |
| b35.zt trans-Diazene           | 36.0 <sup>e</sup>  | 37.2  | 36.6    | 35.3  | 26.4  | 25.4    | 31.6  |
| b36.zt Azoisopropane           | 8.6 <sup>c</sup>   | 4.6   | -4.7    | 2.0   | 6.0   | -7.9    | 7.4   |
| b37.zt Ethylenediamine         | -4.1 <sup>f</sup>  | 3.4   | -0.5    | -3.6  | -1.6  | -7.5    | -2.9  |
| b38.zt Methyleneimine          | 16.0 <sup>b1</sup> | 20.9  | 20.0    | 18.5  | 16.1  | 14.6    | 16.2  |
| b39.zt Guanidine               | 8.0 <sup>e</sup>   | 31.9  | 29.2    | 17.7  | 20.8  | 16.6    | 14.6  |
| b40.zt Aziridine               | 30.2 <sup>c</sup>  | 36.3  | 34.3    | 36.0  | 35.4  | 32.3    | 38.0  |
| b41.zt Pyrrolidine             | -0.8 <sup>c</sup>  | 0.0   | -4.4    | -0.7  | 0.4   | -7.8    | -0.5  |
| b42.zt Piperidine              | -11.3 <sup>c</sup> | -6.6  | -13.9   | -8.2  | -6.3  | -17.5   | -8.2  |
| b43.zt Cyclopentyl azide       | 52.8 <sup>e</sup>  | 58.2  | 49.8    | 60.4  | 59.3  | 46.8    | 59.7  |
| b44.zt Cyclohexyl azide        | 36.9 <sup>e</sup>  | 51.0  | 40.9    | 52.7  | 52.3  | 37.3    | 51.4  |
| b45.zt Diazirine               | 63.9 <sup>c1</sup> | 87.4  | 86.4    | 89.3  | 80.2  | 78.5    | 91.8  |
| b46.zt Pyrrole                 | 25.9 <sup>c</sup>  | 33.7  | 30.2    | 35.6  | 32.0  | 26.3    | 33.9  |
| b47.zt Tetrazole               | 80.0 <sup>c</sup>  | 70.7  | 68.3    | 75.2  | 73.5  | 69.6    | 74.0  |
| b48.zt [1,1'-Biphenyl]-2-amine | 44.1 <sup>f</sup>  | 45.1  | 31.4    | 41.9  | 44.1  | 23.4    | 43.1  |
| b49.zt Dipropyldiazene         | 12.3 <sup>c</sup>  | 8.0   | -0.7    | 6.0   | 9.3   | -4.2    | 12.1  |
| b50.zt Pyridine                | 33.5 <sup>c</sup>  | 30.8  | 26.3    | 33.5  | 29.4  | 22.3    | 31.8  |
| b51.zt Pyridazine              | 66.5 <sup>c</sup>  | 48.4  | 44.3    | 55.3  | 51.1  | 44.6    | 56.0  |
| b52.zt Pyrimidine              | 46.8 <sup>c</sup>  | 44.5  | 40.4    | 48.0  | 41.9  | 35.4    | 43.8  |
| b53.zt Pyrazine                | 46.9 <sup>c</sup>  | 44.9  | 40.9    | 50.0  | 42.0  | 35.5    | 47.8  |
| b54.zt 2-Methylpyridine        | 23.7 <sup>c</sup>  | 22.6  | 16.6    | 23.9  | 20.9  | 11.5    | 23.0  |
| b55.zt 3-Methylpyridine        | 25.4 <sup>c</sup>  | 21.2  | 15.2    | 23.4  | 20.3  | 10.8    | 22.1  |
| b56.zt 4-Methylpyridine        | 24.8 <sup>c</sup>  | 21.2  | 15.1    | 23.2  | 20.4  | 10.9    | 21.9  |
| b57.zt 2,3-Dimethylpyridine    | 16.3 <sup>b</sup>  | 13.4  | 5.5     | 14.6  | 12.3  | 0.2     | 14.3  |
| b58.zt 2,4-Dimethylpyridine    | 15.3 <sup>b</sup>  | 13.1  | 5.5     | 13.6  | 11.9  | 0.1     | 13.1  |
| b59.zt 2,5-Dimethylpyridine    | 15.9 <sup>b</sup>  | 13.3  | 5.7     | 13.9  | 11.9  | 0.2     | 12.9  |
| b60.zt 2,6-Dimethylpyridine    | 14.0 <sup>b</sup>  | 14.5  | 6.9     | 14.3  | 12.4  | 0.7     | 13.2  |
| b61.zt 3,4-Dimethylpyridine    | 16.7 <sup>b</sup>  | 11.8  | 3.8     | 14.3  | 11.7  | -0.5    | 13.8  |

... continued on next page ...

Table S69: ... continued from previous page ...

| Species                           | Ref.                | OM2    | OM2-D3T | ODM2   | OM3    | OM3-D3T | ODM3   |
|-----------------------------------|---------------------|--------|---------|--------|--------|---------|--------|
| b62.zt 3,5-Dimethylpyridine       | 17.4 <sup>b</sup>   | 11.7   | 4.0     | 13.8   | 11.1   | -0.7    | 12.9   |
| b63.zt Benzotriazole              | 80.2 <sup>f</sup>   | 76.8   | 69.9    | 80.7   | 77.9   | 67.0    | 79.2   |
| b64.zt Indole                     | 37.4 <sup>c</sup>   | 48.5   | 40.6    | 49.0   | 47.0   | 34.8    | 47.5   |
| b65.zt Aniline                    | 20.8 <sup>c</sup>   | 25.2   | 19.0    | 22.0   | 22.3   | 12.7    | 22.0   |
| b66.zt Phenyl cyanide             | 51.5 <sup>c</sup>   | 49.7   | 43.7    | 50.1   | 48.0   | 38.6    | 48.3   |
| b67.zt Phenylhydrazine            | 48.5 <sup>c</sup>   | 47.9   | 40.5    | 49.5   | 48.9   | 37.5    | 49.0   |
| b68.zt Cyclobutylamine            | 9.8 <sup>c</sup>    | 11.9   | 6.7     | 7.8    | 8.4    | 0.4     | 8.0    |
| b69.zt Cyclopentylamine           | -13.1 <sup>c</sup>  | -9.9   | -17.0   | -14.6  | -13.8  | -24.6   | -14.2  |
| b70.zt Cyclohexylamine            | -25.1 <sup>c</sup>  | -17.3  | -26.5   | -22.8  | -21.2  | -35.1   | -22.9  |
| b71.zt Isobutylamine              | 18.4 <sup>f</sup>   | 22.4   | 19.0    | 18.9   | 19.3   | 14.0    | 20.6   |
| b72.zt Quinuclidine               | -1.0 <sup>c</sup>   | 2.3    | -8.5    | 6.4    | 7.3    | -9.1    | 5.4    |
| b73.zt 2-Methylpiperidine         | -20.2 <sup>c</sup>  | -13.3  | -22.4   | -16.5  | -13.3  | -27.0   | -16.1  |
| b74.zt Quinoline                  | 47.9 <sup>d1</sup>  | 48.7   | 39.7    | 50.4   | 48.0   | 34.1    | 49.7   |
| b75.zt Isoquinoline               | 48.9 <sup>d1</sup>  | 46.9   | 37.9    | 49.8   | 46.7   | 32.7    | 48.4   |
| b76.zt Quinoxaline                | 57.4 <sup>e1</sup>  | 64.7   | 56.3    | 67.8   | 61.9   | 48.8    | 66.8   |
| b77.zt Acridine                   | 65.5 <sup>f1</sup>  | 71.7   | 58.2    | 72.0   | 71.6   | 50.9    | 72.7   |
| b78.zt Phenazine                  | 80.9 <sup>g1</sup>  | 90.1   | 77.3    | 90.9   | 87.1   | 67.4    | 91.7   |
| b79.zt 3,4-Benzoquinoline         | 57.5 <sup>d1</sup>  | 60.3   | 46.5    | 62.2   | 61.0   | 39.9    | 61.9   |
| b80.zt 5,6-Benzoquinoline         | 55.9 <sup>h1</sup>  | 60.6   | 46.8    | 62.4   | 61.2   | 40.0    | 62.7   |
| b81.zt 7,8-Benzoquinoline         | 59.9 <sup>f1</sup>  | 59.3   | 45.6    | 61.0   | 59.8   | 38.8    | 61.3   |
| b82.zt Carbazole                  | 50.1 <sup>i1</sup>  | 58.7   | 46.3    | 58.0   | 57.6   | 38.6    | 57.1   |
| b83.zt Benzimidazole              | 43.4 <sup>j1</sup>  | 57.5   | 50.2    | 57.6   | 56.6   | 45.1    | 57.2   |
| b84.zt Indazole                   | 58.1 <sup>j1</sup>  | 64.4   | 57.0    | 68.0   | 65.5   | 54.0    | 68.0   |
| b85.zt Pyrazole                   | 42.9 <sup>j1</sup>  | 47.8   | 44.6    | 52.0   | 49.3   | 44.3    | 52.1   |
| b86.zt Imidazole                  | 31.8 <sup>j1</sup>  | 40.0   | 36.9    | 42.4   | 39.7   | 34.6    | 42.7   |
| b87.zt N-Methylpyrrole            | 24.6 <sup>f</sup>   | 31.1   | 26.0    | 35.8   | 33.5   | 25.6    | 33.6   |
| b88.zt N-Methylmethanimine        | 18.5 <sup>c</sup>   | 14.8   | 12.8    | 15.6   | 15.6   | 12.4    | 14.9   |
| b89.zt N-Benzylideneaniline       | 60.6 <sup>c</sup>   | 68.3   | 54.9    | 67.6   | 67.7   | 47.3    | 66.1   |
| c01.zt Water                      | -57.8 <sup>d</sup>  | -56.5  | -56.7   | -58.9  | -58.5  | -58.8   | -58.0  |
| c02.zt Methanol                   | -48.1 <sup>b</sup>  | -49.3  | -50.3   | -50.1  | -49.8  | -51.4   | -49.7  |
| c03.zt Ethanol                    | -56.2 <sup>b</sup>  | -56.9  | -59.1   | -56.7  | -57.2  | -60.8   | -56.6  |
| c04.zt 1-Propanol                 | -61.2 <sup>b</sup>  | -61.9  | -65.6   | -61.9  | -62.2  | -67.9   | -61.6  |
| c05.zt 1-Butanol                  | -65.8 <sup>b</sup>  | -66.4  | -71.6   | -66.5  | -66.9  | -74.8   | -66.6  |
| c06.zt 1-Pentanol                 | -70.7 <sup>b</sup>  | -71.0  | -77.6   | -71.3  | -71.8  | -81.9   | -71.7  |
| c07.zt 1-Hexanol                  | -75.7 <sup>b</sup>  | -75.5  | -83.7   | -76.0  | -76.6  | -89.0   | -76.7  |
| c08.zt 1-Heptanol                 | -79.1 <sup>b</sup>  | -80.1  | -89.8   | -80.8  | -81.5  | -96.1   | -81.8  |
| c09.zt 1-Octanol                  | -85.3 <sup>b</sup>  | -84.7  | -95.9   | -85.5  | -86.3  | -103.1  | -86.9  |
| c10.zt 1-Nonanol                  | -91.1 <sup>b</sup>  | -89.2  | -101.9  | -90.3  | -91.1  | -110.2  | -91.9  |
| c11.zt 2-Propanol                 | -65.1 <sup>b</sup>  | -66.3  | -70.1   | -67.0  | -66.6  | -72.5   | -66.5  |
| c12.zt Isobutanol                 | -67.8 <sup>b</sup>  | -67.9  | -73.5   | -69.6  | -68.1  | -76.7   | -68.5  |
| c13.zt 2-Butanol                  | -70.0 <sup>b</sup>  | -71.1  | -76.5   | -71.9  | -71.3  | -79.5   | -71.3  |
| c14.zt tert-Butanol               | -74.7 <sup>b</sup>  | -76.8  | -82.4   | -78.1  | -75.9  | -84.5   | -76.1  |
| c15.zt 2-Pentanol                 | -75.2 <sup>b</sup>  | -75.6  | -82.5   | -76.5  | -76.0  | -86.5   | -76.2  |
| c16.zt 3-Pentanol                 | -75.2 <sup>b</sup>  | -75.8  | -82.8   | -76.6  | -75.8  | -86.4   | -75.9  |
| c17.zt 2-Methyl-1-butanol         | -72.2 <sup>f</sup>  | -72.3  | -79.5   | -72.8  | -72.0  | -82.8   | -72.2  |
| c18.zt 3-Methyl-1-butanol         | -72.0 <sup>b</sup>  | -72.2  | -79.4   | -74.2  | -72.8  | -83.6   | -73.7  |
| c19.zt 2-Methyl-2-butanol         | -79.1 <sup>b</sup>  | -80.7  | -88.2   | -82.0  | -79.4  | -90.7   | -79.7  |
| c20.zt 3-Methyl-2-butanol         | -75.3 <sup>b</sup>  | -77.2  | -84.6   | -78.3  | -76.2  | -87.3   | -76.7  |
| c21.zt 2-Ethyl-1-hexanol          | -87.3 <sup>b</sup>  | -84.3  | -96.8   | -86.8  | -85.0  | -103.6  | -86.6  |
| c22.zt Ethylene glycol            | -92.6 <sup>c</sup>  | -92.8  | -95.5   | -93.0  | -93.2  | -97.5   | -92.5  |
| c23.zt 1,2-Propanediol            | -104.6 <sup>b</sup> | -103.4 | -107.8  | -105.3 | -104.0 | -110.8  | -103.9 |
| c24.zt 1,3-Butanediol             | -107.5 <sup>b</sup> | -107.3 | -113.2  | -109.9 | -108.3 | -117.3  | -109.2 |
| c25.zt 2,3-Butanediol             | -115.3 <sup>b</sup> | -111.9 | -118.0  | -113.6 | -111.2 | -120.4  | -111.4 |
| c26.zt Glycerol                   | -139.3 <sup>b</sup> | -140.9 | -145.8  | -143.0 | -141.7 | -149.2  | -141.6 |
| c27.zt L-Erythritol               | -185.3 <sup>b</sup> | -188.2 | -195.4  | -190.5 | -187.9 | -198.8  | -187.8 |
| c28.zt Allyl alcohol              | -29.6 <sup>b</sup>  | -30.6  | -33.5   | -30.9  | -30.6  | -35.2   | -30.8  |
| c29.zt tert-Pentyl alcohol        | -78.7 <sup>d</sup>  | -76.1  | -83.8   | -78.4  | -74.6  | -86.2   | -75.9  |
| c30.zt Cyclopentanol              | -58.0 <sup>b</sup>  | -61.9  | -68.4   | -62.7  | -62.8  | -72.7   | -62.4  |
| c31.zt Cyclohexanol               | -68.4 <sup>b</sup>  | -68.9  | -77.5   | -70.2  | -69.9  | -82.9   | -70.6  |
| c32.zt cis-2-Methylcyclohexanol   | -78.2 <sup>c</sup>  | -73.9  | -84.7   | -75.4  | -74.0  | -90.3   | -75.0  |
| c33.zt trans-2-Methylcyclohexanol | -84.3 <sup>c</sup>  | -75.9  | -86.5   | -77.7  | -76.0  | -91.9   | -77.3  |
| c34.zt cis-3-Methylcyclohexanol   | -83.9 <sup>c</sup>  | -75.7  | -86.1   | -77.5  | -76.2  | -91.9   | -77.6  |
| c35.zt trans-3-Methylcyclohexanol | -78.7 <sup>c</sup>  | -74.7  | -85.3   | -76.5  | -75.3  | -91.2   | -76.5  |
| c36.zt cis-4-Methylcyclohexanol   | -83.1 <sup>c</sup>  | -74.6  | -85.2   | -76.4  | -75.3  | -91.1   | -76.5  |

... continued on next page ...



Table S69: ... continued from previous page ...

| Species                                      | Ref.                | OM2    | OM2-D3T | ODM2   | OM3    | OM3-D3T | ODM3   |
|----------------------------------------------|---------------------|--------|---------|--------|--------|---------|--------|
| c37.zt trans-4-Methylcyclohexanol            | -87.8 <sup>c</sup>  | -75.7  | -86.2   | -77.6  | -76.2  | -91.9   | -77.6  |
| c38.zt Phenol                                | -23.0 <sup>b</sup>  | -21.7  | -27.2   | -22.4  | -23.6  | -32.3   | -23.2  |
| c39.zt Benzyl alcohol                        | -22.6 <sup>f</sup>  | -27.1  | -34.3   | -27.8  | -27.3  | -38.5   | -27.6  |
| c40.zt o-Cresol                              | -30.7 <sup>b</sup>  | -30.5  | -37.7   | -31.4  | -32.0  | -43.1   | -31.7  |
| c41.zt m-Cresol                              | -31.6 <sup>b</sup>  | -31.1  | -38.3   | -32.6  | -32.6  | -43.7   | -32.4  |
| c42.zt p-Cresol                              | -30.0 <sup>b</sup>  | -30.6  | -37.7   | -31.5  | -32.2  | -43.3   | -32.0  |
| c43.zt 2,3-Xylenol                           | -37.6 <sup>b</sup>  | -39.5  | -48.7   | -40.3  | -39.8  | -53.8   | -39.5  |
| c44.zt 2,4-Xylenol                           | -38.9 <sup>b</sup>  | -39.5  | -48.4   | -40.5  | -40.3  | -54.0   | -40.1  |
| c45.zt 2,5-Xylenol                           | -38.6 <sup>b</sup>  | -39.9  | -48.8   | -41.4  | -40.6  | -54.3   | -40.3  |
| c46.zt 2,6-Xylenol                           | -38.7 <sup>b</sup>  | -39.4  | -48.4   | -40.4  | -40.0  | -53.8   | -39.7  |
| c47.zt 3,4-Xylenol                           | -37.4 <sup>b</sup>  | -39.9  | -48.9   | -41.0  | -40.6  | -54.5   | -40.6  |
| c48.zt 3,5-Xylenol                           | -38.6 <sup>b</sup>  | -40.5  | -49.3   | -42.7  | -41.7  | -55.1   | -41.5  |
| c49.zt Hydroquinone                          | -63.4 <sup>b</sup>  | -60.6  | -66.7   | -63.1  | -64.5  | -74.0   | -64.3  |
| c50.zt Furfuryl alcohol                      | -50.6 <sup>b</sup>  | -49.3  | -54.2   | -50.5  | -49.4  | -57.0   | -49.0  |
| c51.zt Diethylene glycol                     | -136.5 <sup>c</sup> | -132.2 | -138.0  | -134.6 | -130.0 | -138.9  | -132.2 |
| c52.zt Dimethyl ether                        | -44.0 <sup>b</sup>  | -45.6  | -47.7   | -45.9  | -42.8  | -46.2   | -44.3  |
| c53.zt Diethyl ether                         | -60.3 <sup>b</sup>  | -61.1  | -65.9   | -60.2  | -58.4  | -65.7   | -59.4  |
| c54.zt Dipropyl ether                        | -69.8 <sup>b</sup>  | -71.1  | -78.9   | -70.5  | -68.1  | -79.9   | -69.4  |
| c55.zt Dibutyl ether                         | -79.8 <sup>b</sup>  | -80.1  | -90.9   | -79.8  | -77.7  | -93.9   | -79.4  |
| c56.zt Diisopropyl ether                     | -76.2 <sup>b</sup>  | -77.7  | -86.2   | -78.1  | -74.1  | -86.8   | -76.2  |
| c57.zt di-sec-Butyl ether                    | -86.3 <sup>b</sup>  | -84.8  | -97.5   | -85.8  | -80.9  | -99.3   | -83.5  |
| c58.zt di-tert-Butyl ether                   | -86.5 <sup>c</sup>  | -92.3  | -105.7  | -94.6  | -85.1  | -104.9  | -88.7  |
| c59.zt Methyl ethyl ether                    | -51.7 <sup>b</sup>  | -53.4  | -56.8   | -53.0  | -50.6  | -56.0   | -51.9  |
| c60.zt Methyl propyl ether                   | -56.8 <sup>b</sup>  | -58.4  | -63.3   | -58.1  | -55.5  | -63.0   | -56.9  |
| c61.zt Methyl isopropyl ether                | -60.2 <sup>b</sup>  | -61.7  | -66.9   | -61.9  | -58.6  | -66.5   | -60.3  |
| c62.zt Methyl tert-butyl ether               | -67.7 <sup>c</sup>  | -70.5  | -77.9   | -71.4  | -66.1  | -77.2   | -68.3  |
| c63.zt Isopropyl tert-Butyl ether            | -85.6 <sup>d</sup>  | -86.6  | -97.5   | -88.1  | -81.4  | -97.6   | -84.4  |
| c64.zt Dimethoxymethane                      | -83.3 <sup>b</sup>  | -79.9  | -83.7   | -78.9  | -71.4  | -77.3   | -75.1  |
| c65.zt 1,1-Dimethoxyethane                   | -93.3 <sup>b</sup>  | -91.6  | -97.7   | -93.4  | -83.3  | -92.5   | -88.0  |
| c66.zt 2,2-Diethoxypropane                   | -121.1 <sup>c</sup> | -120.7 | -131.4  | -120.8 | -111.0 | -126.9  | -109.4 |
| c67.zt Divinyl ether                         | -3.3 <sup>b</sup>   | 4.5    | 1.2     | 3.9    | 4.6    | -0.6    | 2.9    |
| c68.zt Ethyl vinyl ether                     | -33.6 <sup>b</sup>  | -28.2  | -32.3   | -28.1  | -26.8  | -33.1   | -28.1  |
| c69.zt Ethylene oxide                        | -12.6 <sup>b</sup>  | -13.3  | -14.8   | -10.1  | -8.8   | -11.2   | -5.1   |
| c70.zt Propylene oxide                       | -22.6 <sup>b</sup>  | -21.2  | -24.0   | -18.4  | -17.1  | -21.5   | -13.7  |
| c71.zt Oxetane                               | -19.2 <sup>c</sup>  | -17.7  | -20.6   | -18.8  | -15.8  | -20.5   | -17.2  |
| c72.zt Tetrahydrofuran                       | -44.0 <sup>c</sup>  | -47.9  | -52.5   | -48.9  | -46.3  | -53.5   | -47.3  |
| c73.zt Tetrahydropyran                       | -53.4 <sup>c</sup>  | -53.1  | -59.6   | -54.5  | -51.7  | -61.8   | -53.8  |
| c74.zt 1,3-Dioxolan                          | -71.2 <sup>c</sup>  | -78.5  | -82.0   | -79.9  | -70.8  | -76.2   | -74.0  |
| c75.zt 1,4-Dioxane                           | -75.5 <sup>b</sup>  | -76.5  | -81.8   | -79.3  | -72.4  | -80.5   | -76.3  |
| c76.zt 1,3-Dioxane                           | -83.7 <sup>b</sup>  | -82.9  | -88.3   | -84.7  | -75.9  | -84.1   | -80.7  |
| c77.zt 2-Methyl-1,3-dioxan                   | -95.4 <sup>b</sup>  | -95.0  | -101.8  | -96.0  | -87.6  | -98.0   | -92.2  |
| c78.zt 4-Methyl-1,3-dioxan                   | -90.5 <sup>b</sup>  | -92.6  | -99.6   | -94.1  | -85.0  | -95.6   | -90.0  |
| c79.zt cis-2,4-Dimethyl-1,3-dioxan           | -102.3 <sup>b</sup> | -104.6 | -113.0  | -105.4 | -96.5  | -109.4  | -101.5 |
| c80.zt 4,5-Dimethyl-1,3-dioxan               | -98.2 <sup>b</sup>  | -99.7  | -108.6  | -101.7 | -90.8  | -104.3  | -96.5  |
| c81.zt 5,5-Dimethyl-1,3-dioxan               | -100.7 <sup>b</sup> | -98.2  | -107.5  | -101.0 | -88.6  | -102.6  | -94.7  |
| c82.zt 2-cis-4-trans-6-Trimethyl- 1,3-dioxan | -106.8 <sup>b</sup> | -112.2 | -122.7  | -113.6 | -103.6 | -119.3  | -108.8 |
| c83.zt 2-Methoxytetrahydropyran              | -95.5 <sup>c</sup>  | -97.2  | -106.1  | -99.2  | -90.3  | -103.6  | -95.2  |
| c84.zt 1,3-Dioxacycloheptane                 | -82.8 <sup>c</sup>  | -84.1  | -91.3   | -86.1  | -77.6  | -88.6   | -82.9  |
| c85.zt a-Trioxan                             | -113.3 <sup>c</sup> | -116.3 | -120.4  | -117.4 | -100.5 | -107.0  | -109.0 |
| c86.zt Anisole                               | -17.3 <sup>b</sup>  | -16.0  | -23.0   | -16.3  | -14.1  | -25.0   | -15.4  |
| c87.zt Furan                                 | -8.3 <sup>b</sup>   | -2.9   | -5.9    | -3.4   | -2.7   | -7.4    | -2.2   |
| c88.zt Dihydropyran                          | -27.0 <sup>f</sup>  | -24.5  | -30.1   | -26.2  | -24.3  | -33.0   | -26.0  |
| c89.zt Formaldehyde                          | -25.9 <sup>c</sup>  | -30.3  | -30.9   | -30.0  | -31.9  | -32.8   | -32.3  |
| c90.zt Acetaldehyde                          | -39.7 <sup>b</sup>  | -44.2  | -45.8   | -44.1  | -46.5  | -49.1   | -46.7  |
| c91.zt Propanal                              | -45.5 <sup>b</sup>  | -48.2  | -51.3   | -48.7  | -50.5  | -55.3   | -50.5  |
| c92.zt Butanal                               | -48.9 <sup>b</sup>  | -53.0  | -57.5   | -53.6  | -55.4  | -62.4   | -55.6  |
| c93.zt Pentanal                              | -54.5 <sup>d</sup>  | -57.5  | -63.5   | -58.3  | -60.2  | -69.4   | -60.6  |
| c94.zt Hexanal                               | -59.4 <sup>d</sup>  | -62.1  | -69.6   | -63.1  | -65.1  | -76.5   | -65.7  |
| c95.zt Heptanal                              | -63.1 <sup>d</sup>  | -66.7  | -75.7   | -67.8  | -69.9  | -83.6   | -70.8  |
| c96.zt Octanal                               | -69.2 <sup>d</sup>  | -71.2  | -81.8   | -72.6  | -74.7  | -90.6   | -75.8  |
| c97.zt 2-Methylpropanal                      | -52.2 <sup>b</sup>  | -55.2  | -60.0   | -55.4  | -57.1  | -64.3   | -57.5  |
| c98.zt 2-Butanone                            | -57.0 <sup>b</sup>  | -62.4  | -66.9   | -62.2  | -63.4  | -70.3   | -63.0  |
| c99.zt 2-Butenal                             | -24.0 <sup>b</sup>  | -28.5  | -32.1   | -28.4  | -30.1  | -35.8   | -30.3  |

... continued on next page ...

Table S69: ... continued from previous page ...

| Species                             | Ref.                | OM2    | OM2-D3T | ODM2   | OM3    | OM3-D3T | ODM3   |
|-------------------------------------|---------------------|--------|---------|--------|--------|---------|--------|
| c100.zt Glyoxal                     | -50.7 <sup>c</sup>  | -59.1  | -60.6   | -58.5  | -62.6  | -65.0   | -63.1  |
| c101.zt Benzaldehyde                | -8.8 <sup>c</sup>   | -14.5  | -20.9   | -13.6  | -15.6  | -25.6   | -15.7  |
| c102.zt Acetic anhydride            | -137.1 <sup>b</sup> | -139.5 | -143.9  | -139.7 | -138.8 | -145.7  | -143.4 |
| c103.zt Maleic anhydride            | -95.2 <sup>c</sup>  | -87.1  | -90.4   | -87.4  | -87.2  | -92.5   | -90.4  |
| c104.zt Acetone                     | -51.9 <sup>b</sup>  | -57.4  | -60.4   | -57.8  | -59.3  | -63.9   | -59.3  |
| c105.zt 3-Pentanone                 | -61.6 <sup>b</sup>  | -67.1  | -73.4   | -67.0  | -67.9  | -77.3   | -67.1  |
| c106.zt 2-Pentanone                 | -61.9 <sup>b</sup>  | -67.0  | -73.0   | -66.9  | -68.3  | -77.5   | -68.5  |
| c107.zt 3-Methyl-2-butanone         | -62.8 <sup>k1</sup> | -69.2  | -75.5   | -69.4  | -69.8  | -79.3   | -69.5  |
| c108.zt 2-Hexanone                  | -66.9 <sup>b</sup>  | -71.6  | -79.1   | -71.7  | -73.1  | -84.5   | -73.5  |
| c109.zt 3,3-Dimethyl-2-butanone     | -69.5 <sup>k1</sup> | -76.9  | -85.5   | -77.5  | -74.9  | -88.2   | -75.7  |
| c110.zt 3-Hexanone                  | -66.5 <sup>b</sup>  | -71.7  | -79.4   | -71.7  | -72.8  | -84.4   | -72.2  |
| c111.zt 2-Methyl-3-pentanone        | -68.4 <sup>l1</sup> | -73.9  | -82.0   | -74.3  | -73.9  | -85.7   | -73.5  |
| c112.zt 2,2-Dimethyl-3-pentanone    | -75.0 <sup>l1</sup> | -81.3  | -91.6   | -82.0  | -78.9  | -94.1   | -79.8  |
| c113.zt 2,4-Dimethyl-3-pentanone    | -74.4 <sup>l1</sup> | -80.7  | -90.5   | -81.5  | -79.8  | -94.5   | -80.0  |
| c114.zt Isopropyl tert-butyl ketone | -80.8 <sup>b</sup>  | -88.0  | -100.4  | -89.4  | -85.1  | -103.5  | -86.3  |
| c115.zt Diacetyl                    | -78.2 <sup>b</sup>  | -88.8  | -93.0   | -89.0  | -90.7  | -97.3   | -90.5  |
| c116.zt Acetylacetone               | -90.5 <sup>b</sup>  | -99.2  | -105.2  | -99.3  | -101.8 | -111.0  | -101.6 |
| c117.zt p-Benzoquinone              | -29.3 <sup>b</sup>  | -32.5  | -37.9   | -31.6  | -32.9  | -41.3   | -32.0  |
| c118.zt Cyclopentanone              | -46.0 <sup>b</sup>  | -55.0  | -60.6   | -54.7  | -57.5  | -66.1   | -56.9  |
| c119.zt Cyclohexanone               | -54.0 <sup>b</sup>  | -59.9  | -67.6   | -60.0  | -62.1  | -73.7   | -61.8  |
| c120.zt Cycloheptanone              | -59.1 <sup>c</sup>  | -59.3  | -69.1   | -59.8  | -61.7  | -76.5   | -61.7  |
| c121.zt Acetophenone                | -20.7 <sup>c</sup>  | -27.4  | -35.5   | -26.5  | -27.6  | -40.0   | -26.9  |
| c122.zt Furfural                    | -36.1 <sup>c</sup>  | -50.7  | -56.4   | -50.9  | -50.8  | -59.6   | -49.6  |
| c123.zt Tropolone                   | -37.1 <sup>c</sup>  | -32.0  | -39.1   | -32.9  | -34.4  | -45.4   | -32.2  |
| c124.zt Formic acid                 | -90.6 <sup>b</sup>  | -86.9  | -87.8   | -88.0  | -88.2  | -89.7   | -89.6  |
| c125.zt Acetic acid                 | -103.3 <sup>b</sup> | -101.0 | -103.0  | -102.2 | -102.7 | -106.0  | -103.8 |
| c126.zt Propionic acid              | -108.4 <sup>c</sup> | -106.3 | -109.8  | -107.6 | -107.5 | -112.9  | -108.4 |
| c127.zt n-Butyric acid              | -113.7 <sup>c</sup> | -111.2 | -116.2  | -112.0 | -112.3 | -120.0  | -113.4 |
| c128.zt n-Valeric acid              | -117.1 <sup>c</sup> | -115.6 | -122.1  | -117.2 | -117.1 | -127.0  | -118.4 |
| c129.zt Hexanoic acid               | -122.5 <sup>c</sup> | -120.3 | -128.3  | -121.5 | -121.9 | -134.1  | -123.5 |
| c130.zt Heptanoic acid              | -127.7 <sup>c</sup> | -124.8 | -134.3  | -126.3 | -126.8 | -141.2  | -128.5 |
| c131.zt Oxalic acid                 | -173.0 <sup>c</sup> | -162.5 | -165.0  | -163.1 | -164.2 | -168.1  | -164.3 |
| c132.zt Maleic acid                 | -162.4 <sup>c</sup> | -149.1 | -153.9  | -150.6 | -150.5 | -157.9  | -152.0 |
| c133.zt Succinic acid               | -196.7 <sup>c</sup> | -184.8 | -190.2  | -186.5 | -187.2 | -195.5  | -189.0 |
| c134.zt Acrylic acid                | -80.4 <sup>d</sup>  | -68.9  | -71.7   | -69.6  | -69.2  | -73.6   | -70.1  |
| c135.zt Benzoic acid                | -70.7 <sup>c</sup>  | -71.1  | -78.0   | -71.2  | -71.0  | -81.8   | -71.3  |
| c136.zt Methyl formate              | -85.0 <sup>c</sup>  | -81.4  | -83.5   | -82.1  | -79.4  | -82.6   | -82.1  |
| c137.zt Ethyl acetate               | -106.3 <sup>b</sup> | -103.9 | -108.5  | -105.0 | -102.1 | -109.2  | -104.7 |
| c138.zt Ethyl propionate            | -111.1 <sup>c</sup> | -109.1 | -115.2  | -109.8 | -106.8 | -116.1  | -109.2 |
| c139.zt Isopropyl acrylate          | -89.7 <sup>m1</sup> | -86.9  | -95.2   | -88.1  | -83.8  | -96.5   | -86.4  |
| c140.zt Methyl valerate             | -112.7 <sup>c</sup> | -110.4 | -118.1  | -111.7 | -108.2 | -120.0  | -111.3 |
| c141.zt n-Butyl acetate             | -116.1 <sup>c</sup> | -113.4 | -121.0  | -114.8 | -111.6 | -123.2  | -114.6 |
| c142.zt Methyl caproate             | -118.0 <sup>c</sup> | -114.9 | -124.2  | -116.5 | -113.0 | -127.1  | -116.4 |
| c143.zt Ethyl pentanoate            | -121.2 <sup>c</sup> | -118.4 | -127.6  | -119.8 | -116.4 | -130.2  | -119.3 |
| c144.zt Vinyl acetate               | -75.3 <sup>c</sup>  | -71.3  | -75.2   | -72.3  | -70.4  | -76.5   | -73.2  |
| c145.zt Methyl crotonate            | -81.7 <sup>c</sup>  | -79.3  | -84.6   | -80.1  | -76.6  | -84.9   | -79.0  |
| c146.zt Ethyl crotonate             | -89.8 <sup>c</sup>  | -87.6  | -94.2   | -88.4  | -84.9  | -95.1   | -86.9  |
| c147.zt Ethyl pent-4-ynoate         | -55.7 <sup>c</sup>  | -48.5  | -55.9   | -50.3  | -46.5  | -57.7   | -48.9  |
| c148.zt Ethyl pent-3-ynoate         | -56.8 <sup>c</sup>  | -50.6  | -57.6   | -52.3  | -50.0  | -60.7   | -52.3  |
| c149.zt Ethyl pent-2-ynoate         | -59.8 <sup>c</sup>  | -47.1  | -54.0   | -47.4  | -45.5  | -56.1   | -46.7  |
| c150.zt Ethyl b-vinylacrylate       | -69.2 <sup>b</sup>  | -62.5  | -69.8   | -63.6  | -59.1  | -70.4   | -61.8  |
| c151.zt Ethyl 4-pentenoate          | -92.2 <sup>c</sup>  | -88.1  | -96.5   | -89.6  | -85.6  | -98.3   | -88.4  |
| c152.zt Ethyl cis-3-pentenoate      | -92.7 <sup>c</sup>  | -90.8  | -99.2   | -91.8  | -88.6  | -101.4  | -91.2  |
| c153.zt Ethyl trans-3-pentenoate    | -93.2 <sup>c</sup>  | -92.1  | -100.2  | -92.9  | -89.8  | -102.2  | -92.3  |
| c154.zt Ethyl cis-2-pentenoate      | -94.3 <sup>c</sup>  | -90.9  | -99.4   | -92.0  | -88.3  | -101.1  | -90.5  |
| c155.zt Ethyl trans-2-pentenoate    | -94.2 <sup>c</sup>  | -92.1  | -100.3  | -93.0  | -89.4  | -101.8  | -91.6  |
| c156.zt n-Propyl crotonate          | -94.5 <sup>c</sup>  | -92.5  | -100.7  | -93.5  | -89.7  | -102.1  | -91.8  |
| c157.zt Isopropyl crotonate         | -98.2 <sup>c</sup>  | -97.3  | -105.8  | -98.1  | -94.1  | -107.0  | -96.6  |
| c158.zt Propiolactone               | -67.6 <sup>c</sup>  | -54.2  | -56.8   | -55.3  | -54.0  | -58.3   | -56.4  |
| c159.zt Ethylene carbonate          | -121.5 <sup>c</sup> | -120.4 | -123.7  | -120.7 | -113.3 | -118.5  | -117.6 |
| c160.zt 4-Hydroxy-3-pentene-2-one   | -92.1 <sup>n1</sup> | -94.1  | -99.8   | -96.2  | -97.2  | -106.0  | -97.3  |
| c161.zt Hydrogen peroxide           | -32.5 <sup>o1</sup> | -35.3  | -35.8   | -34.8  | -36.9  | -37.6   | -36.0  |
| c162.zt Dimethyl peroxide           | -30.1 <sup>c</sup>  | -37.3  | -39.9   | -36.1  | -30.7  | -34.6   | -31.7  |
| c163.zt Diethyl peroxide            | -46.1 <sup>c</sup>  | -52.6  | -57.8   | -49.5  | -46.0  | -53.8   | -46.1  |

... continued on next page ...

Table S69: ... continued from previous page ...

| Species                                 | Ref.                 | OM2    | OM2-D3T | ODM2   | OM3    | OM3-D3T | ODM3   |
|-----------------------------------------|----------------------|--------|---------|--------|--------|---------|--------|
| c164.zt Ozone                           | 34.1 <sup>f</sup>    | 37.9   | 37.5    | 39.7   | 48.7   | 48.1    | 52.8   |
| c165.zt Carbon monoxide                 | -26.4 <sup>f</sup>   | -20.3  | -20.5   | -19.3  | -21.5  | -21.8   | -17.5  |
| c166.zt Carbon dioxide                  | -94.0 <sup>f</sup>   | -80.5  | -80.9   | -81.8  | -87.7  | -88.4   | -89.4  |
| c167.zt Ketene                          | -11.4 <sup>f</sup>   | -5.1   | -6.1    | -6.5   | -11.0  | -12.6   | -10.9  |
| c168.zt Carbon suboxide                 | -22.4 <sup>f</sup>   | -3.2   | -4.4    | -6.5   | -16.9  | -18.9   | -16.2  |
| c169.zt Pentamethylene formal           | -80.5 <sup>c</sup>   | -86.3  | -95.5   | -88.9  | -80.6  | -94.3   | -86.5  |
| c170.zt 1,3-Dioxindane                  | -71.5 <sup>f</sup>   | -70.0  | -77.8   | -73.1  | -73.3  | -85.4   | -72.6  |
| c171.zt Furoic acid                     | -93.2 <sup>c</sup>   | -87.4  | -92.2   | -88.3  | -86.9  | -94.4   | -86.7  |
| c172.zt Fumeric Acid                    | -161.5 <sup>c</sup>  | -154.0 | -158.5  | -155.7 | -155.5 | -162.4  | -157.2 |
| c173.zt 1-Ethoxypropane                 | -65.1 <sup>c</sup>   | -66.1  | -72.4   | -65.3  | -63.2  | -72.8   | -64.4  |
| c174.zt 3,3-Dimethyl oxetane            | -35.4 <sup>c</sup>   | -34.5  | -40.9   | -35.9  | -31.5  | -41.2   | -33.4  |
| c175.zt 3-Oxabicyclo[3.2.2]nonan        | -53.2 <sup>p1</sup>  | -50.1  | -62.4   | -52.2  | -48.9  | -67.3   | -51.6  |
| c176.zt 1,2-Diethoxyethane              | -97.6 <sup>c</sup>   | -101.2 | -109.1  | -99.8  | -95.1  | -107.1  | -97.8  |
| c177.zt 2,2-Dimethoxypropane            | -102.7 <sup>c</sup>  | -107.8 | -115.6  | -109.0 | -99.0  | -110.7  | -103.5 |
| c178.zt 2-Ethylhexanal                  | -71.6 <sup>b</sup>   | -72.4  | -83.9   | -73.2  | -74.1  | -91.2   | -75.4  |
| c179.zt 4-Heptanone                     | -71.3 <sup>q1</sup>  | -76.3  | -85.7   | -76.6  | -77.3  | -91.0   | -78.3  |
| c180.zt 5-Nonanone                      | -82.4 <sup>k1</sup>  | -85.5  | -97.8   | -86.2  | -87.2  | -105.6  | -87.4  |
| c181.zt 6-Undecanone                    | -92.6 <sup>q1</sup>  | -94.6  | -110.1  | -95.6  | -96.9  | -119.7  | -97.5  |
| c182.zt 3-Methyl-2-pentanone            | -67.9 <sup>q1</sup>  | -73.3  | -81.3   | -73.7  | -73.8  | -85.9   | -73.9  |
| c183.zt 3,3-Dimethyl-2-pentanone        | -72.6 <sup>q1</sup>  | -80.2  | -90.7   | -80.8  | -78.3  | -94.1   | -78.9  |
| c184.zt 4-Methyl-2-pentanone            | -69.6 <sup>q1</sup>  | -73.4  | -81.6   | -74.0  | -74.3  | -86.5   | -74.6  |
| c185.zt 4,4-Dimethyl-2-pentanone        | -76.6 <sup>q1</sup>  | -80.9  | -91.4   | -82.1  | -80.0  | -95.6   | -81.2  |
| c186.zt 3,3,4-Trimethyl-2-pentanone     | -78.5 <sup>q1</sup>  | -86.2  | -99.2   | -87.6  | -83.2  | -102.4  | -84.6  |
| c187.zt 3,3,4,4-Tetramethyl-2-pentanone | -83.1 <sup>q1</sup>  | -92.4  | -108.1  | -94.4  | -86.9  | -110.0  | -89.3  |
| c188.zt di-tert-Butyl ketone            | -82.7 <sup>l1</sup>  | -92.3  | -107.2  | -93.8  | -86.7  | -108.7  | -88.4  |
| c189.zt tert-Butyl neopentyl ketone     | -94.1 <sup>l1</sup>  | -99.1  | -116.0  | -101.8 | -95.0  | -119.5  | -97.8  |
| c190.zt Dineopentyl ketone              | -100.7 <sup>r1</sup> | -102.1 | -121.9  | -106.5 | -100.3 | -126.8  | -103.3 |
| c191.zt Cyclooctanone                   | -64.9 <sup>c</sup>   | -62.8  | -74.7   | -64.1  | -65.7  | -83.5   | -66.8  |
| c192.zt Norbornan-2-one                 | -40.8 <sup>s1</sup>  | -45.8  | -54.6   | -46.6  | -46.7  | -60.3   | -47.7  |
| c193.zt Norbornan-7-one                 | -32.0 <sup>s1</sup>  | -41.2  | -49.9   | -41.8  | -42.4  | -55.9   | -43.1  |
| c194.zt Bicyclo[3.2.1]octan-2-one       | -51.8 <sup>t1</sup>  | -57.0  | -68.1   | -57.5  | -57.9  | -74.7   | -58.3  |
| c195.zt Bicyclo[3.2.1]octan-3-one       | -52.9 <sup>t1</sup>  | -58.1  | -69.2   | -58.7  | -59.4  | -76.1   | -60.0  |
| c196.zt Bicyclo[3.2.1]octan-8-one       | -46.2 <sup>t1</sup>  | -54.6  | -65.7   | -55.3  | -55.9  | -72.7   | -56.5  |
| c197.zt Bicyclo[3.3.1]nonane-3-one      | -63.8 <sup>t1</sup>  | -64.6  | -78.1   | -65.4  | -66.2  | -86.6   | -67.3  |
| c198.zt Bicyclo[3.3.1]nonane-9-one      | -57.3 <sup>t1</sup>  | -59.8  | -73.2   | -60.4  | -61.9  | -82.0   | -62.4  |
| c199.zt Adamantanone                    | -55.1 <sup>t1</sup>  | -64.0  | -78.9   | -65.1  | -63.9  | -86.4   | -65.5  |
| c200.zt Diadamantanone                  | -56.6 <sup>t1</sup>  | -68.8  | -91.5   | -71.5  | -67.1  | -100.8  | -71.1  |
| c201.zt Camphor                         | -63.9 <sup>t1</sup>  | -67.2  | -83.0   | -69.4  | -64.5  | -87.9   | -67.4  |
| c202.zt 2-Methyl-2-propenal             | -25.4 <sup>f</sup>   | -27.1  | -30.9   | -26.7  | -27.9  | -33.9   | -28.1  |
| c203.zt 2-Ethylacrolein                 | -31.4 <sup>f</sup>   | -31.1  | -36.5   | -31.3  | -31.7  | -40.1   | -32.5  |
| c204.zt Xanthone                        | -23.5 <sup>f</sup>   | -26.8  | -40.2   | -27.7  | -24.8  | -45.4   | -25.7  |
| c205.zt Methyl acetate                  | -98.8 <sup>c</sup>   | -95.6  | -98.8   | -96.7  | -93.8  | -99.0   | -96.7  |
| c206.zt Isovaleric acid                 | -123.0 <sup>c</sup>  | -111.9 | -119.1  | -113.0 | -112.3 | -123.1  | -113.6 |
| c207.zt Pivalic acid                    | -117.4 <sup>c</sup>  | -116.5 | -123.9  | -117.3 | -114.3 | -125.7  | -115.5 |
| c208.zt Octanoic acid                   | -132.8 <sup>c</sup>  | -123.2 | -134.3  | -125.1 | -125.3 | -142.1  | -127.5 |
| c209.zt 2-Ethylhexanoic acid            | -133.7 <sup>c</sup>  | -124.1 | -136.2  | -125.7 | -126.3 | -142.5  | -126.4 |
| c210.zt Methyl heptanoate               | -123.5 <sup>c</sup>  | -119.4 | -130.2  | -121.2 | -117.9 | -134.2  | -121.4 |
| c211.zt n-Propyl pentanoate             | -127.5 <sup>c</sup>  | -123.5 | -134.1  | -124.6 | -121.2 | -137.3  | -124.2 |
| c212.zt n-Butyl pentanoate              | -133.9 <sup>c</sup>  | -128.0 | -140.1  | -129.3 | -126.0 | -144.3  | -129.2 |
| c213.zt Methyl pivalate                 | -118.2 <sup>c</sup>  | -116.9 | -125.6  | -118.7 | -111.6 | -124.7  | -114.5 |
| c214.zt Ethyl pivalate                  | -128.1 <sup>c</sup>  | -125.1 | -135.3  | -126.4 | -119.8 | -134.9  | -122.5 |
| c215.zt Methyl isovalerate              | -119.0 <sup>c</sup>  | -112.3 | -120.7  | -113.6 | -109.3 | -121.8  | -112.3 |
| c216.zt Ethyl isovalerate               | -126.0 <sup>c</sup>  | -120.5 | -130.6  | -122.3 | -117.5 | -132.0  | -120.2 |
| c217.zt Methyl a-methylbutyrate         | -117.7 <sup>c</sup>  | -112.8 | -121.0  | -114.3 | -109.1 | -121.6  | -111.7 |
| c218.zt Ethyl a-methylbutyrate          | -124.9 <sup>c</sup>  | -120.9 | -130.5  | -122.0 | -117.3 | -131.8  | -119.6 |
| c219.zt sec-Butyl butyrate              | -130.3 <sup>c</sup>  | -128.5 | -139.7  | -129.4 | -125.3 | -142.1  | -128.6 |
| c220.zt sec-Butyl pentanoate            | -137.0 <sup>c</sup>  | -133.0 | -145.8  | -134.1 | -130.1 | -149.1  | -133.6 |
| c221.zt Isopropyl pentanoate            | -130.2 <sup>c</sup>  | -128.3 | -139.3  | -129.2 | -125.6 | -142.1  | -128.9 |
| c222.zt Isobutyl pentanoate             | -135.9 <sup>c</sup>  | -129.8 | -142.6  | -131.8 | -127.0 | -146.2  | -130.6 |
| c223.zt Butyrolactone                   | -87.6 <sup>u1</sup>  | -88.9  | -93.3   | -89.7  | -87.9  | -94.7   | -89.8  |
| c224.zt Valerolactone                   | -90.7 <sup>u1</sup>  | -91.0  | -97.3   | -91.4  | -89.2  | -98.9   | -91.5  |
| c225.zt Caprolactone                    | -94.7 <sup>v1</sup>  | -90.7  | -99.1   | -91.2  | -89.0  | -101.7  | -91.5  |
| c226.zt Hepanlactone                    | -98.3 <sup>v1</sup>  | -95.9  | -106.5  | -96.9  | -94.2  | -110.1  | -97.5  |
| c227.zt tert-Butyl hydroperoxide        | -58.8 <sup>c</sup>   | -62.8  | -69.1   | -62.4  | -59.1  | -68.5   | -59.3  |
| c228.zt di-tert-Butyl peroxide          | -83.4 <sup>c</sup>   | -86.9  | -100.2  | -88.0  | -78.8  | -98.3   | -81.7  |

... continued on next page ...

Table S69: ... continued from previous page ...

| Species                                   | Ref.                | OM2    | OM2-D3T | ODM2   | OM3    | OM3-D3T | ODM3   |
|-------------------------------------------|---------------------|--------|---------|--------|--------|---------|--------|
| c229.zt eq-Cyclohexyl hydroperoxide       | -55.0 <sup>o1</sup> | -55.7  | -64.8   | -55.0  | -53.5  | -67.3   | -54.0  |
| c230.zt 1-Methyl cyclohexyl hydroperoxide | -63.0 <sup>o1</sup> | -64.7  | -76.2   | -64.9  | -61.4  | -78.5   | -62.5  |
| c231.zt 1-Hydroperoxyhexane               | -62.0 <sup>o1</sup> | -63.1  | -71.7   | -61.8  | -60.9  | -73.9   | -61.1  |
| c232.zt 2-Hydroperoxyhexane               | -64.0 <sup>o1</sup> | -66.1  | -75.3   | -65.3  | -63.5  | -77.2   | -63.7  |
| c233.zt 3-Hydroperoxyhexane               | -63.0 <sup>o1</sup> | -66.1  | -75.5   | -67.2  | -63.6  | -77.6   | -64.5  |
| c234.zt Tropone                           | 10.5 <sup>c</sup>   | 15.2   | 8.7     | 15.5   | 13.5   | 3.4     | 14.2   |
| c235.zt Ethyl phenyl ketone               | -26.0 <sup>c</sup>  | -32.0  | -41.3   | -30.8  | -31.6  | -46.4   | -30.9  |
| c236.zt Methyl hydroperoxide              | -31.3 <sup>w1</sup> | -36.7  | -38.1   | -35.7  | -33.9  | -36.1   | -33.8  |
| c237.zt Ethyl hydroperoxide               | -47.5 <sup>c</sup>  | -43.8  | -46.6   | -43.3  | -41.5  | -45.8   | -41.3  |
| c238.zt Isopropyl hydroperoxide           | -47.1 <sup>w1</sup> | -53.2  | -57.5   | -52.0  | -50.3  | -57.0   | -50.1  |
| d01.zt Formamide                          | -44.5 <sup>x1</sup> | -39.8  | -41.1   | -43.2  | -46.3  | -48.4   | -48.5  |
| d02.zt Dimethylformamide                  | -45.8 <sup>b</sup>  | -43.5  | -47.6   | -39.4  | -41.4  | -47.7   | -45.5  |
| d03.zt Acetamide                          | -57.0 <sup>f</sup>  | -50.7  | -53.2   | -55.6  | -57.4  | -61.4   | -59.1  |
| d04.zt Butanamide                         | -66.7 <sup>f</sup>  | -60.3  | -65.9   | -65.9  | -66.7  | -75.2   | -68.7  |
| d05.zt Pentanamide                        | -69.4 <sup>c</sup>  | -64.8  | -72.0   | -70.1  | -71.6  | -82.4   | -73.6  |
| d06.zt Hexanamide                         | -78.4 <sup>c</sup>  | -69.4  | -78.1   | -74.9  | -76.4  | -89.5   | -78.7  |
| d07.zt Urea                               | -58.7 <sup>c</sup>  | -39.9  | -42.1   | -50.6  | -49.3  | -52.8   | -54.2  |
| d08.zt Oxamide                            | -96.2 <sup>c</sup>  | -80.4  | -83.9   | -88.7  | -92.8  | -98.1   | -94.8  |
| d09.zt n-Propylcarbamate                  | -112.7 <sup>c</sup> | -99.1  | -104.9  | -105.1 | -101.8 | -110.6  | -106.2 |
| d10.zt e-Caprolactam                      | -58.8 <sup>c</sup>  | -50.7  | -59.9   | -53.0  | -55.7  | -69.5   | -59.2  |
| d11.zt N,N-Dimethylbutryamide             | -64.7 <sup>f</sup>  | -62.7  | -71.5   | -60.3  | -60.0  | -73.3   | -64.0  |
| d12.zt Nitromethane                       | -17.9 <sup>b</sup>  | -17.3  | -19.1   | -17.0  | -15.7  | -18.5   | -12.9  |
| d13.zt Nitroethane                        | -24.4 <sup>b</sup>  | -23.4  | -26.6   | -23.8  | -22.0  | -27.0   | -20.4  |
| d14.zt 1-Nitropropane                     | -30.0 <sup>b</sup>  | -28.2  | -32.9   | -28.8  | -26.8  | -34.0   | -25.3  |
| d15.zt 2-Nitropropane                     | -33.2 <sup>b</sup>  | -31.2  | -36.1   | -32.7  | -29.9  | -37.4   | -28.6  |
| d16.zt 1-Nitrobutane                      | -34.4 <sup>b</sup>  | -32.8  | -39.0   | -33.5  | -31.5  | -40.9   | -30.2  |
| d17.zt 2-Nitrobutane                      | -39.1 <sup>b</sup>  | -36.2  | -42.9   | -38.0  | -34.8  | -44.9   | -33.7  |
| d18.zt Nitric acid                        | -32.1 <sup>y</sup>  | -33.6  | -34.6   | -35.9  | -33.4  | -35.1   | -33.4  |
| d19.zt Methyl nitrate                     | -29.1 <sup>b</sup>  | -32.7  | -34.9   | -34.9  | -28.4  | -31.8   | -29.8  |
| d20.zt Ethyl nitrate                      | -36.8 <sup>b</sup>  | -41.6  | -45.1   | -43.0  | -36.6  | -42.0   | -37.8  |
| d21.zt n-Propylnitrate                    | -41.6 <sup>b</sup>  | -46.7  | -51.7   | -48.3  | -41.5  | -49.1   | -42.7  |
| d22.zt Isopropylnitrate                   | -45.6 <sup>b</sup>  | -51.7  | -57.0   | -53.6  | -46.1  | -54.0   | -47.4  |
| d23.zt Nitrous acid                       | -18.3 <sup>f</sup>  | -19.7  | -20.3   | -19.9  | -26.8  | -27.8   | -25.8  |
| d24.zt Methyl nitrite                     | -15.6 <sup>f</sup>  | -16.8  | -18.4   | -17.4  | -20.0  | -22.6   | -20.3  |
| d25.zt Methacrylamide                     | -37.7 <sup>f</sup>  | -33.5  | -38.4   | -38.2  | -38.7  | -46.3   | -40.3  |
| d26.zt N-Methylacetamide                  | -59.3 <sup>f</sup>  | -51.4  | -55.3   | -52.4  | -54.1  | -60.2   | -56.4  |
| d27.zt 5-Methylisoxazole                  | 3.6 <sup>b</sup>    | 12.6   | 8.7     | 14.3   | 13.0   | 6.8     | 13.1   |
| d28.zt 3-Methylisoxazole                  | 4.8 <sup>b</sup>    | 16.4   | 12.4    | 15.8   | 16.1   | 9.9     | 15.6   |
| d29.zt 3,5-Dimethylisoxazole              | -4.3 <sup>b</sup>   | 5.2    | -0.2    | 5.0    | 5.0    | -3.3    | 4.6    |
| d30.zt 3,4,5-Trimethylisoxazole           | -4.8 <sup>b</sup>   | -3.4   | -10.6   | -3.1   | -3.1   | -14.1   | -3.6   |
| d31.zt Isocyanic acid                     | -24.3 <sup>f</sup>  | -7.2   | -7.9    | -13.8  | -19.5  | -20.7   | -25.0  |
| d32.zt Propanamide                        | -61.9 <sup>f</sup>  | -55.7  | -59.8   | -60.6  | -62.0  | -68.4   | -63.5  |
| d33.zt Dimethylaminomethane               | -48.6 <sup>f</sup>  | -47.2  | -52.2   | -46.3  | -41.1  | -48.5   | -45.6  |
| d34.zt N-Butyl acetamide                  | -72.8 <sup>b</sup>  | -65.8  | -74.3   | -68.0  | -69.1  | -81.8   | -73.1  |
| d35.zt Isophthalamide                     | -91.4 <sup>f</sup>  | -57.4  | -67.7   | -66.8  | -67.9  | -83.5   | -71.6  |
| d36.zt Glycine                            | -93.7 <sup>b</sup>  | -88.2  | -91.3   | -92.6  | -91.3  | -96.1   | -92.5  |
| d37.zt L-Alanine                          | -99.1 <sup>y1</sup> | -95.1  | -99.8   | -100.7 | -98.0  | -105.3  | -99.3  |
| d38.zt L-Valine                           | -108.8 <sup>b</sup> | -109.5 | -118.1  | -112.1 | -111.4 | -124.2  | -109.8 |
| d39.zt L-Leucine                          | -116.3 <sup>b</sup> | -113.6 | -123.8  | -116.5 | -115.7 | -130.9  | -114.8 |
| d40.zt Benzamide                          | -24.1 <sup>f</sup>  | -20.1  | -27.7   | -24.3  | -25.2  | -36.9   | -26.7  |
| d41.zt 2-Methyl propanamide               | -67.5 <sup>f</sup>  | -62.8  | -68.7   | -68.1  | -68.3  | -77.2   | -70.3  |

a M.W.Chase, C.A.Davies, J.R.Downey, D.R.Frurip, R.A.McDonald, and A.N.Syverud, "JANAF Thermochemical Tables", 3rd edition, J.Phys.Chem.Ref.Data 14, Suppl.1 (1985). b J.D.Cox, G.Pilcher, "Thermochemistry of Organic and Organometallic Compounds", Academic Press Inc., New York (1970). c J.B.Pedley, R.D.Naylor, S.P.Kirby, "Thermochemical Data of Organic Compounds", 2 ed., Chapman and Hall, New York (1986). d R.D.Stull, E.F.J.Westrum, G.C.Sinke, "The Chemical Thermodynamics of Organic Compounds", John Wiley & Sons, Inc., New York (1969). e S.G.Lias, J.E.Bartmess, J.F.Liebman, J.L.Holmes, R.D.Levin, W.G.Mallard, J.Phys.Chem.Ref.Data, Suppl. 17 (1998). f H.Y.Afeefy, J.F.Liebman, and S.E.Stein, "Neutral Thermochemical Data", 20899 (<http://webbook.nist.gov>) ed.; P.J.Linstrom, and W.G.Mallard, Ed., National Institute of Standards and Technology, Gaithersburg, MD (2001). g W.V.Steele, R.D.Chirico, A.Nguyen, I.A.Hossenlopp, and N.K.Smith, Am.Inst.Chem.Eng.Symp.Ser. (AIChE Symp.Ser.) 138 (1990). h W.R.Roth, O.Adamczak, R.Breuckmann, H.W.Lennartz, and R.Boese, Chem.Ber. 124, 2499-2521 (1991). i W.Fang and D.W.Rogers, J.Org.Chem. 57, 2294 (1992). j S.W.Benson and H.E.O'Neal, "Kinetic Data on Gas Phase Unimolecular Reactions" (1970). k R.B.Turner, P.Goebel, B.J.Mallon, W.v.E.Doering, J.F.J.Coburn, and M.Pomerantz, J.Am.Chem.Soc. 90, 4315 (1968). l T.V.Siretskaya, V.V.Takhistov, S.M.Pimenova, V.M.Orlov, and V.N.Pustobaev, React.Kinet.Catal.Lett. 31, 15 (1986). m D.w.Rogers, O.A.Dagdagan, and N.L.Allinger, J.Am.Chem.Soc.

101, 671 (1979). n R.Shaw, "The Chemistry of the Carbon-Carbon Triple Bond", John Wiley & Sons, New York, Vol. 1 (1978). o N.D.Lebedeva, V.L.Ryadnenko, N.N.Kiseleva, and L.F.Nazarova, Vses.Konf.Kalorim.Rasshir.Tezisy.Dokl.7th. 1, 91 (1977). p value, S.F.N.M. q P.v.R.Schleyer, J.E.Williams, and K.R.Blanchard, J.Am.Chem.Soc. 92, 2377 (1970). r T.Bally, H.Baumgaertel, U.Buechler, E.Haselbach, W.Lohr, J.P.Maier, and J.Vogt, Helv.Chim.Acta. 61, 741 (1978). s W.D.Good, R.T.Moore, A.g.Osborn, and D.R.Douslin, J.Chem.Thermodyn. 6, 303 (1974). t M.P.Kozina, L.P.Timofeeva, S.M.Skuratov, N.A.Belikova, E.M.Milvitskaya, and A.F.Plate, J.Chem.Thermodyn. 3, 563 (1971). u K.B.Wiberg, and J.J.Wendoloski, J.Am.Chem.Soc. 104, 5679 (1982). v T.Clark, T.M.O.Knox, M.A.McKervey, H.Mackle, and J.J.Rooney, J.Am.Chem.Soc. 101, 2404 (1979). w S.P.Verevkin, M.Nolke, H.D.Beckhaus, and C.Ruchardt, J.Org.Chem. 62, 4683 (1997). x J.D.Cox, D.D.Wagman, V.A.Medvedev, "CODATA Key Values for Thermodynamics", Hemisphere Publishing Corp., New York (1984). y M.W.J.Chase, J.Phys.Chem.Ref.Data Monograph 9, 1 (1998). z X.W.An, and M.Mansson, J.Chem.Thermodyn. 15, 287 (1983). a1 H.D.Beckhaus, B.Dogan, J.Pakusch, S.Verevkin, and C.Ruchardt, Chem.Ber. 123, 2153 (1990). b1 R.A.L.Peerboom, S.Ingemann, N.M.M.Nibbering, and J.F.Liebman, J.Chem.Soc.,Perkin.Trans.2. 1, 1825 (1990). c1 A.H.Laufer, and H.Okabe, J.Phys.Chem. 76, 3504 (1972). d1 W.V.Steele, D.G.Archer, R.D.Chirico, W.B.Collier, I.A.Hossenlopp, A.Nguyen, N.K.Smith, and B.E.Gammon, J.Chem.Thermodyn. 20, 1233 (1988). e1 M.A.V.Silva, M.A.R.Matos, and V.M.F.Morais, J.Chem.Soc.,Faraday.Trans. 91, 1907 (1995). f1 W.V.Steele, R.D.Chirico, I.A.Hossenlopp, A.Nguyen, N.K.Smith, and B.E.Gammon, J.Chem.Thermodyn. 21, 81 (1989). g1 R.Sabbah, and L.Elwatik, Thermochim.Acta. 176, 163 (1991). h1 D.M.McEachern, J.C.Iniguez, and H.C.Ornelas, J.Chem.Eng.Data. 20, 226 (1975). i1 R.Sabbah and I.Antipine, Bull.Soc.Chim.France. 3, 392 (1987). j1 P.Jimenez, M.V.Roux, C.Turrion, and F.Gomis, J.Chem.Thermodyn. 19, 985 (1987). k1 A.Harrop, A.J.Head, and G.B.Lewis, J.Chem.Thermodyn. 2, 203 (1970). l1 P.Sellers, J.Chem.Thermodyn. 2, 211 (1970). m1 W.V.Steele, R.D.Chirico, S.E.Knipmeyer, A.Nguyen, and N.K.Smith, J.Chem.Eng.Data. 41, 1285 (1996). n1 T.P.Melia and R.Merrifield, J.Appl.Chem. 19, 79 (1969). o1 K.S.Chen and N.L.Allinger, J.Comput.Chem. 14, 755 (1993). p1 S.W.S.Wong and E.F.Westrum, J.Am.Chem.Soc. 93, 5317 (1971). q1 J.E.Dubois and H.Herzog, J.Chem.Soc.Chem.Comm. 16, 932 (1972). r1 P.Seller, Acta.Chemica.Scandinava. 25, 2099 (1971). s1 W.V.Steele, J.Chem.Thermodyn. 10, 585 (1978). t1 N.L.Allinger, K.S.Chen, M.Rahman, and A.Pathiaseril, J.Am.Chem.Soc. 113, 4505 (1991). u1 M.Luisa, G.Pilcher, M.Y.Yang, J.M.Brown, and A.D.Conn, J.Chem.Thermodyn. 22, 885 (1990). v1 K.B.Wiberg and R.F.Waldron, J.Am.Chem.Soc. 113, 7697 (1991). w1 S.L.Khursan and V.S.Martem'yanov, Russ.J.Phys.Chem.(Engl.Transl). 65, 321 (1991). x1 A.Bauder and H.H.Gunthard, Helv.Chim.Acta. 41, 670 (1958). y1 S.N.Ngav, R.Sabbah, and M.Laffitte, Thermochim.Acta. 20, 371 (1977).

Table S70: Benchmark Results for the PDDG Set. Ionization Potentials (eV)

| Species                       | Ref.               | OM2   | OM2-D3T | ODM2  | OM3   | OM3-D3T | ODM3  |
|-------------------------------|--------------------|-------|---------|-------|-------|---------|-------|
| 01.zt Hydrogen                | 15.98 <sup>a</sup> | 15.68 | 15.68   | 15.64 | 15.65 | 15.65   | 15.67 |
| 02.zt Methane                 | 14.00 <sup>a</sup> | 13.64 | 13.64   | 13.66 | 14.17 | 14.17   | 14.30 |
| 03.zt Ethane                  | 12.10 <sup>b</sup> | 11.92 | 11.92   | 11.93 | 12.30 | 12.30   | 12.43 |
| 04.zt n-Propane               | 11.50 <sup>a</sup> | 11.39 | 11.39   | 11.36 | 11.69 | 11.69   | 11.82 |
| 05.zt n-Butane                | 11.20 <sup>c</sup> | 10.95 | 10.94   | 10.82 | 11.47 | 11.47   | 11.53 |
| 06.zt n-Pentane               | 10.90 <sup>c</sup> | 10.66 | 10.66   | 10.49 | 11.35 | 11.34   | 11.31 |
| 12.zt 2-Methylpropane         | 11.40 <sup>a</sup> | 11.06 | 11.07   | 10.96 | 11.41 | 11.41   | 11.53 |
| 13.zt 2,2-Dimethylpropane     | 11.30 <sup>a</sup> | 10.82 | 10.82   | 10.70 | 11.31 | 11.31   | 11.31 |
| 14.zt 2-Methylbutane          | 11.00 <sup>c</sup> | 10.65 | 10.65   | 10.53 | 11.13 | 11.13   | 11.17 |
| 49.zt Ethylene                | 10.51 <sup>a</sup> | 10.74 | 10.74   | 10.53 | 11.05 | 11.05   | 10.87 |
| 50.zt Propene                 | 9.88 <sup>b</sup>  | 9.97  | 9.97    | 9.80  | 10.27 | 10.27   | 10.15 |
| 51.zt 1-Butene                | 9.63 <sup>c</sup>  | 9.93  | 9.93    | 9.74  | 10.26 | 10.26   | 10.13 |
| 52.zt 1-Pentene               | 9.52 <sup>c</sup>  | 9.86  | 9.85    | 9.67  | 10.21 | 10.21   | 10.09 |
| 67.zt 2-Methyl-2-butene       | 8.68 <sup>c</sup>  | 8.94  | 8.94    | 8.80  | 9.19  | 9.19    | 9.11  |
| 68.zt 2-Methyl-1-butene       | 9.15 <sup>c</sup>  | 9.47  | 9.47    | 9.29  | 9.78  | 9.78    | 9.67  |
| 69.zt 3-Methyl-1-butene       | 9.53 <sup>c</sup>  | 9.88  | 9.88    | 9.67  | 10.25 | 10.25   | 10.09 |
| 97.zt Allene                  | 11.40 <sup>a</sup> | 10.16 | 10.16   | 9.97  | 10.44 | 10.45   | 10.31 |
| 98.zt 1,2-Butadiene           | 9.33 <sup>c</sup>  | 9.49  | 9.49    | 9.33  | 9.75  | 9.75    | 9.66  |
| 106.zt 1,4-Pentadiene         | 9.62 <sup>c</sup>  | 9.89  | 9.90    | 9.71  | 10.16 | 10.17   | 10.04 |
| 112.zt Acetylene              | 11.40 <sup>a</sup> | 11.55 | 11.55   | 11.35 | 11.79 | 11.79   | 11.64 |
| 113.zt Propyne                | 10.37 <sup>a</sup> | 10.64 | 10.64   | 10.47 | 10.88 | 10.88   | 10.78 |
| 114.zt 1-Butyne               | 10.20 <sup>c</sup> | 10.51 | 10.51   | 10.32 | 10.76 | 10.76   | 10.67 |
| 121.zt 2-Butyne               | 9.59 <sup>c</sup>  | 9.91  | 9.91    | 9.76  | 10.14 | 10.15   | 10.07 |
| 128.zt 1,3-Butadiyne          | 10.17 <sup>a</sup> | 10.30 | 10.30   | 10.06 | 10.47 | 10.47   | 10.29 |
| 137.zt Benzene                | 9.24 <sup>a</sup>  | 9.59  | 9.59    | 9.41  | 9.91  | 9.91    | 9.76  |
| 138.zt Naphthalene            | 8.15 <sup>a</sup>  | 8.51  | 8.51    | 8.31  | 8.79  | 8.79    | 8.63  |
| 139.zt Anthracene             | 7.44 <sup>d</sup>  | 7.81  | 7.81    | 7.59  | 8.07  | 8.07    | 7.91  |
| 144.zt Toluene                | 8.82 <sup>b</sup>  | 9.17  | 9.17    | 9.00  | 9.46  | 9.46    | 9.35  |
| 145.zt Ethylbenzene           | 8.80 <sup>e</sup>  | 9.14  | 9.14    | 8.96  | 9.47  | 9.47    | 9.35  |
| 163.zt Cyclopropane           | 11.00 <sup>b</sup> | 10.88 | 10.88   | 10.71 | 11.47 | 11.47   | 11.38 |
| 164.zt Cyclobutane            | 11.00 <sup>f</sup> | 10.38 | 10.38   | 10.24 | 10.98 | 10.98   | 10.97 |
| 164.zt Cyclobutane            | 10.70 <sup>c</sup> | 10.38 | 10.38   | 10.24 | 10.98 | 10.98   | 10.97 |
| 165.zt Cyclopentane           | 10.70 <sup>c</sup> | 10.91 | 10.91   | 10.87 | 11.28 | 11.29   | 11.38 |
| 166.zt Cyclohexane            | 10.30 <sup>c</sup> | 10.15 | 10.15   | 10.04 | 10.70 | 10.69   | 10.70 |
| 205.zt Cyclopropene           | 9.86 <sup>a</sup>  | 9.84  | 9.84    | 9.70  | 10.13 | 10.13   | 10.06 |
| 206.zt Cyclobutene            | 9.43 <sup>a</sup>  | 9.65  | 9.64    | 9.49  | 9.93  | 9.93    | 9.82  |
| 207.zt Cyclopentene           | 9.18 <sup>a</sup>  | 9.22  | 9.22    | 9.09  | 9.51  | 9.51    | 9.44  |
| 208.zt Cyclohexene            | 8.94 <sup>c</sup>  | 9.29  | 9.29    | 9.14  | 9.59  | 9.59    | 9.51  |
| 219.zt 1,3,5-Cycloheptatriene | 8.50 <sup>d</sup>  | 8.57  | 8.58    | 8.39  | 8.82  | 8.84    | 8.72  |
| 220.zt 1,3-Cyclopentadiene    | 8.57 <sup>a</sup>  | 8.82  | 8.82    | 8.63  | 9.10  | 9.10    | 8.97  |
| 230.zt Bicyclo[2.2.2]octane   | 9.47 <sup>d</sup>  | 9.77  | 9.77    | 9.66  | 10.25 | 10.25   | 10.25 |
| 242.zt Adamantane             | 9.75 <sup>d</sup>  | 9.59  | 9.59    | 9.49  | 10.06 | 10.06   | 10.07 |
| b01.zt Nitrogen               | 15.60 <sup>b</sup> | 15.46 | 15.46   | 15.55 | 14.51 | 14.51   | 14.73 |
| b02.zt Ammonia                | 10.85 <sup>b</sup> | 10.67 | 10.67   | 10.84 | 11.23 | 11.23   | 11.30 |
| b03.zt Methylamine            | 9.45 <sup>f</sup>  | 9.75  | 9.75    | 9.91  | 10.00 | 10.01   | 10.13 |
| b04.zt Ethylamine             | 9.50 <sup>d</sup>  | 9.60  | 9.60    | 9.75  | 9.84  | 9.84    | 9.95  |
| b07.zt Dimethylamine          | 8.93 <sup>f</sup>  | 9.23  | 9.23    | 9.41  | 9.24  | 9.25    | 9.38  |
| b08.zt Trimethylamine         | 8.54 <sup>f</sup>  | 8.84  | 8.85    | 9.07  | 8.67  | 8.69    | 8.87  |
| b15.zt Hydrocyanic acid       | 13.60 <sup>b</sup> | 13.91 | 13.91   | 13.89 | 13.94 | 13.94   | 13.86 |
| b16.zt Acetonitrile           | 12.21 <sup>g</sup> | 12.50 | 12.50   | 12.52 | 12.63 | 12.63   | 12.67 |
| b17.zt Propionitrile          | 11.85 <sup>d</sup> | 12.06 | 12.06   | 12.11 | 12.25 | 12.25   | 12.36 |
| b20.zt Cyanogen               | 13.36 <sup>g</sup> | 13.27 | 13.27   | 13.36 | 13.22 | 13.22   | 13.33 |
| b22.zt Acrylonitrile          | 10.91 <sup>g</sup> | 10.88 | 10.88   | 10.80 | 11.09 | 11.09   | 11.06 |
| b27.zt Methylhydrazine        | 9.30 <sup>e</sup>  | 9.57  | 9.57    | 9.80  | 9.75  | 9.75    | 10.00 |
| b34.zt Isocyanomethane        | 11.30 <sup>d</sup> | 12.14 | 12.14   | 12.12 | 12.20 | 12.20   | 12.31 |
| b40.zt Aziridine              | 9.80 <sup>b</sup>  | 10.13 | 10.13   | 10.19 | 10.39 | 10.39   | 10.41 |
| b46.zt Pyrrole                | 8.21 <sup>g</sup>  | 8.46  | 8.47    | 8.27  | 8.65  | 8.65    | 8.49  |
| b50.zt Pyridine               | 9.67 <sup>h</sup>  | 9.96  | 9.96    | 9.78  | 10.13 | 10.13   | 10.08 |
| b51.zt Pyridazine             | 9.31 <sup>d</sup>  | 9.91  | 9.91    | 9.75  | 9.96  | 9.96    | 10.14 |
| b52.zt Pyrimidine             | 9.73 <sup>d</sup>  | 10.03 | 10.03   | 9.89  | 10.04 | 10.04   | 10.10 |
| b53.zt Pyrazine               | 9.63 <sup>d</sup>  | 9.68  | 9.68    | 9.51  | 9.76  | 9.76    | 9.82  |
| b65.zt Aniline                | 8.05 <sup>d</sup>  | 8.24  | 8.24    | 8.15  | 8.42  | 8.43    | 8.47  |
| b66.zt Phenyl cyanide         | 9.73 <sup>d</sup>  | 9.91  | 9.91    | 9.81  | 10.16 | 10.16   | 10.12 |

... continued on next page ...

Table S70: ... continued from previous page ...

| Species                   | Ref.               | OM2   | OM2-D3T | ODM2  | OM3   | OM3-D3T | ODM3  |
|---------------------------|--------------------|-------|---------|-------|-------|---------|-------|
| c01.zt Water              | 12.62 <sup>b</sup> | 12.91 | 12.91   | 12.88 | 13.12 | 13.12   | 13.05 |
| c02.zt Methanol           | 10.96 <sup>a</sup> | 11.22 | 11.22   | 11.17 | 11.60 | 11.60   | 11.66 |
| c03.zt Ethanol            | 10.63 <sup>d</sup> | 10.88 | 10.88   | 10.85 | 11.21 | 11.21   | 11.28 |
| c16.zt 3-Pentanol         | 10.25 <sup>d</sup> | 10.32 | 10.32   | 10.27 | 10.80 | 10.80   | 10.87 |
| c52.zt Dimethyl ether     | 10.04 <sup>a</sup> | 10.51 | 10.51   | 10.43 | 10.94 | 10.94   | 11.03 |
| c53.zt Diethyl ether      | 9.64 <sup>d</sup>  | 10.23 | 10.23   | 10.16 | 10.60 | 10.60   | 10.68 |
| c69.zt Ethylene oxide     | 10.57 <sup>a</sup> | 11.31 | 11.31   | 11.21 | 11.79 | 11.79   | 11.84 |
| c86.zt Anisole            | 8.40 <sup>d</sup>  | 8.74  | 8.74    | 8.59  | 9.15  | 9.15    | 9.07  |
| c87.zt Furan              | 8.88 <sup>a</sup>  | 9.03  | 9.03    | 8.83  | 9.45  | 9.45    | 9.30  |
| c89.zt Formaldehyde       | 10.88 <sup>b</sup> | 11.03 | 11.03   | 10.91 | 11.26 | 11.26   | 11.25 |
| c90.zt Acetaldehyde       | 10.21 <sup>a</sup> | 10.62 | 10.62   | 10.51 | 10.94 | 10.94   | 10.91 |
| c92.zt Butanal            | 9.84 <sup>d</sup>  | 10.27 | 10.27   | 10.14 | 10.65 | 10.65   | 10.62 |
| c99.zt 2-Butenal          | 9.86 <sup>d</sup>  | 10.30 | 10.30   | 10.19 | 10.63 | 10.63   | 10.55 |
| c100.zt Glyoxal           | 10.59 <sup>a</sup> | 10.57 | 10.57   | 10.50 | 10.75 | 10.75   | 10.72 |
| c101.zt Benzaldehyde      | 9.72 <sup>d</sup>  | 9.93  | 9.94    | 9.79  | 10.26 | 10.27   | 10.15 |
| c103.zt Maleic anhydride  | 11.11 <sup>d</sup> | 11.72 | 11.72   | 11.68 | 12.07 | 12.07   | 11.99 |
| c104.zt Acetone           | 9.72 <sup>a</sup>  | 10.31 | 10.31   | 10.19 | 10.67 | 10.67   | 10.58 |
| c116.zt Acetylacetone     | 9.63 <sup>d</sup>  | 10.30 | 10.30   | 10.18 | 10.68 | 10.69   | 10.59 |
| c124.zt Formic acid       | 11.51 <sup>a</sup> | 11.72 | 11.72   | 11.65 | 12.12 | 12.12   | 12.09 |
| c125.zt Acetic acid       | 10.85 <sup>d</sup> | 11.33 | 11.33   | 11.26 | 11.76 | 11.76   | 11.70 |
| c126.zt Propionic acid    | 10.60 <sup>d</sup> | 11.07 | 11.07   | 11.00 | 11.49 | 11.49   | 11.44 |
| c131.zt Oxalic acid       | 11.20 <sup>d</sup> | 11.41 | 11.41   | 11.36 | 11.62 | 11.62   | 11.53 |
| c135.zt Benzoic acid      | 9.80 <sup>e</sup>  | 10.08 | 10.08   | 9.92  | 10.34 | 10.34   | 10.19 |
| c136.zt Methyl formate    | 11.02 <sup>a</sup> | 11.24 | 11.24   | 11.18 | 11.70 | 11.70   | 11.72 |
| c158.zt Propiolactone     | 10.60 <sup>e</sup> | 10.96 | 10.96   | 10.89 | 11.39 | 11.39   | 11.36 |
| c162.zt Dimethyl peroxide | 9.71 <sup>d</sup>  | 10.71 | 10.72   | 10.66 | 11.16 | 11.19   | 11.23 |
| c164.zt Ozone             | 12.75 <sup>f</sup> | 12.85 | 12.85   | 12.80 | 13.27 | 13.27   | 13.10 |
| c165.zt Carbon monoxide   | 14.01 <sup>a</sup> | 13.60 | 13.60   | 13.36 | 13.68 | 13.68   | 13.42 |
| c166.zt Carbon dioxide    | 13.78 <sup>a</sup> | 13.27 | 13.27   | 13.21 | 13.57 | 13.57   | 13.47 |
| c167.zt Ketene            | 9.64 <sup>a</sup>  | 9.75  | 9.75    | 9.59  | 9.97  | 9.97    | 9.82  |
| c205.zt Methyl acetate    | 10.60 <sup>e</sup> | 10.90 | 10.90   | 10.84 | 11.39 | 11.39   | 11.37 |
| d12.zt Nitromethane       | 11.30 <sup>e</sup> | 11.84 | 11.84   | 11.84 | 11.74 | 11.74   | 11.55 |
| d24.zt Methyl nitrite     | 11.00 <sup>e</sup> | 10.97 | 10.98   | 10.94 | 11.06 | 11.06   | 11.07 |
| d31.zt Isocyanic acid     | 11.60 <sup>e</sup> | 11.34 | 11.34   | 11.44 | 11.43 | 11.43   | 11.54 |
| d37.zt L-Alanine          | 9.60 <sup>i</sup>  | 9.92  | 9.92    | 10.09 | 10.07 | 10.07   | 10.23 |

a J.W.Robinson (ed.), "Handbook of Spectroscopy", Vol.1, CRC Press, Baton Rouge, 1980. b D.W.Turner, C.Baker, A.D.Baker, and C.R.Brundle, "Molecular Photoelectron Spectroscopy", Wiley-Interscience, London, 1970. c G.Bieri, F.Burger, E.Heilbronner, and J.P.Maier, *Helv.Chim.Acta* 60, 2213 (1977). d W.G.Mallard and P.J.Linstrom (eds.), "NIST Chemistry WebBook", NIST Standard Reference Data Base 69, National Institute of Standards and Technology, Gaithersburg MD, 20899; <http://webbook.nist.gov/chemistry> e Taken from the experimental data quoted in: J.J.P.Stewart, *J.Comput.Chem.* 10, 221 (1989). f Taken from the experimental data quoted in: M.J.S. Dewar, W.Thiel, *J.Am.Chem.Soc.* 99, 4907 (1977). g S.G.Lias, J.E.Bartmess, J.F.Liebman, J.L.Holmes, R.D.Levin, and W.G.Mallard, "Gas Phase Ion and Neutral Thermochemistry", *J.Phys.Chem.Ref.Data* 17, Suppl. 1 (1988). h From experimental data of dubious accuracy quoted in: J.J.P.Stewart, *J.Comput.Chem.* 10, 221 (1991). Original source: G.Dittmer and U.Niemann, *Philips J.Res.* 37, 1 (1982). i Reference not defined

Table S71: Benchmark Results for the PM7-CHNOF Set. Heats of Formation (kcal/mol)

| Species                                           | Ref.               | OM2   | OM2-D3T | ODM2  | OM3   | OM3-D3T | ODM3  |
|---------------------------------------------------|--------------------|-------|---------|-------|-------|---------|-------|
| # 3 Hydrogen (Geo)                                | 0.0 <sup>a</sup>   | -3.4  | -3.5    | -0.1  | -0.0  | -0.1    | 0.0   |
| # 588 Nitrogen (Geo)                              | 0.0 <sup>a</sup>   | 2.8   | 2.6     | 1.5   | 2.6   | 2.2     | 4.6   |
| # 1029 Oxygen, triplet state (Geo)                | 0.0 <sup>a</sup>   | 2.0   | 1.9     | 3.9   | -2.6  | -2.8    | 0.4   |
| # 1030 Oxygen (Singlet)                           | 22.0 <sup>a</sup>  | 29.4  | 29.3    | 31.4  | 25.9  | 25.7    | 29.0  |
| # 1532 Fluorine (Geo)                             | 0.0 <sup>a</sup>   | 0.6   | 0.5     | -0.9  | -1.7  | -1.8    | -1.3  |
| # 49 Methylene, singlet (Geo)                     | 99.8 <sup>a</sup>  | 103.9 | 103.7   | 98.4  | 101.3 | 100.8   | 96.9  |
| # 50 Methylene, triplet (Geo)                     | 99.8 <sup>a</sup>  | 91.9  | 91.6    | 89.6  | 90.3  | 89.8    | 88.7  |
| # 54 Methane (Geo)                                | -17.9 <sup>a</sup> | -19.3 | -19.9   | -19.3 | -18.0 | -19.1   | -17.8 |
| # 60 Acetylene (Geo)                              | 54.3 <sup>a</sup>  | 54.2  | 53.6    | 53.9  | 54.7  | 53.7    | 54.2  |
| # 64 Ethylene (Geo)                               | 12.4 <sup>a</sup>  | 12.9  | 11.7    | 12.9  | 13.9  | 12.0    | 13.7  |
| # 69 Ethane (Geo)                                 | -20.0 <sup>a</sup> | -21.2 | -23.0   | -20.8 | -20.8 | -23.6   | -20.0 |
| # 84 Allene (Geo)                                 | 45.6 <sup>a</sup>  | 45.9  | 44.3    | 45.7  | 45.5  | 42.9    | 45.7  |
| # 85 Cyclopropene (Geo)                           | 66.2 <sup>a</sup>  | 67.4  | 65.7    | 66.9  | 65.5  | 62.8    | 65.6  |
| # 88 Propyne (Geo)                                | 44.4 <sup>a</sup>  | 44.5  | 42.9    | 44.3  | 44.1  | 41.5    | 44.3  |
| # 93 Cyclopropane (Geo)                           | 12.7 <sup>a</sup>  | 9.9   | 7.6     | 10.7  | 10.1  | 6.3     | 11.9  |
| # 96 Propene (Geo)                                | 4.9 <sup>a</sup>   | 4.7   | 2.3     | 4.8   | 5.0   | 1.1     | 5.0   |
| # 99 Propane (Geo)                                | -24.8 <sup>a</sup> | -25.5 | -28.7   | -25.2 | -25.4 | -30.4   | -24.8 |
| # 105 Diacetylene (Geo)                           | 113.0 <sup>a</sup> | 118.0 | 116.6   | 116.8 | 116.1 | 113.7   | 115.9 |
| # 109 Vinylacetylene (Geo)                        | 72.8 <sup>a</sup>  | 71.2  | 69.0    | 70.7  | 71.2  | 67.6    | 70.9  |
| # 115 Bicyclobutane (Geo)                         | 51.9 <sup>a</sup>  | 62.0  | 59.0    | 61.7  | 59.9  | 55.2    | 61.4  |
| # 117 2-Butyne (Geo)                              | 34.7 <sup>a</sup>  | 35.1  | 32.4    | 34.5  | 33.8  | 29.6    | 34.1  |
| # 121 1,3-Butadiene (Geo)                         | 26.0 <sup>a</sup>  | 29.4  | 26.3    | 29.3  | 30.3  | 25.5    | 29.8  |
| # 125 1-Butene (Geo)                              | -0.2 <sup>a</sup>  | 0.1   | -3.8    | 0.1   | 0.3   | -5.7    | 0.3   |
| # 127 Cyclobutane (Geo)                           | 6.8 <sup>a</sup>   | 3.0   | -1.0    | 2.4   | 2.9   | -3.3    | 3.3   |
| # 129 Isobutene (Geo)                             | -4.3 <sup>a</sup>  | -4.3  | -8.2    | -4.0  | -3.9  | -10.0   | -3.6  |
| # 131 trans-2-Butene (Geo)                        | -3.0 <sup>a</sup>  | -3.8  | -7.5    | -3.7  | -4.0  | -9.8    | -3.9  |
| # 135 n-Butane (Geo)                              | -30.4 <sup>a</sup> | -30.1 | -34.8   | -29.9 | -30.3 | -37.5   | -29.8 |
| # 136 Isobutane (Geo)                             | -32.4 <sup>a</sup> | -31.8 | -36.7   | -31.9 | -31.3 | -38.8   | -31.1 |
| # 146 Cyclopentadiene (Geo)                       | 32.1 <sup>a</sup>  | 33.3  | 29.3    | 33.5  | 32.6  | 26.2    | 32.2  |
| # 156 Spiropentane (Geo)                          | 44.3 <sup>a</sup>  | 42.8  | 38.4    | 43.6  | 41.0  | 34.3    | 42.7  |
| # 167 Neopentane (Geo)                            | -40.3 <sup>a</sup> | -39.6 | -46.4   | -40.2 | -37.6 | -48.1   | -38.2 |
| # 173 Benzene (Geo)                               | 19.8 <sup>a</sup>  | 18.8  | 13.8    | 19.7  | 18.5  | 10.6    | 18.9  |
| # 175 Fulvene (Geo)                               | 47.5 <sup>a</sup>  | 56.9  | 52.1    | 57.3  | 57.4  | 49.9    | 56.9  |
| # 186 Cyclohexene (Geo)                           | -1.1 <sup>a</sup>  | 0.4   | -6.4    | 0.6   | -1.1  | -11.6   | -0.9  |
| # 194 Cyclohexane (Geo)                           | -29.5 <sup>a</sup> | -27.1 | -35.0   | -27.2 | -28.5 | -40.5   | -28.5 |
| # 279 Naphthalene (Geo)                           | 36.0 <sup>a</sup>  | 34.8  | 25.3    | 35.8  | 35.7  | 21.0    | 35.7  |
| # 324 Biphenyl, for torsion (Torsion angle) (Geo) | 43.5 <sup>a</sup>  | 39.0  | 27.0    | 40.1  | 40.1  | 21.8    | 40.0  |
| # 48 Methylidyne                                  | 142.4 <sup>a</sup> | 140.0 | 139.9   | 136.0 | 138.1 | 137.9   | 134.7 |
| # 53 Methyl, cation                               | 261.0 <sup>a</sup> | 255.7 | 255.3   | 248.1 | 262.4 | 261.6   | 255.0 |
| # 61 Vinyl, cation                                | 266.0 <sup>a</sup> | 258.5 | 257.6   | 252.3 | 262.9 | 261.5   | 258.1 |
| # 62 Vinyl                                        | 59.6 <sup>a</sup>  | 67.4  | 66.6    | 66.5  | 66.4  | 64.9    | 66.1  |
| # 63 Ethylene, cation                             | 257.0 <sup>a</sup> | 244.8 | 243.6   | 238.9 | 251.5 | 249.6   | 246.3 |
| # 66 Methylmethylene                              | 90.3 <sup>a</sup>  | 74.1  | 72.9    | 71.3  | 72.0  | 70.1    | 72.1  |
| # 67 Ethyl, cation                                | 216.0 <sup>a</sup> | 213.4 | 211.9   | 208.1 | 219.2 | 216.8   | 215.3 |
| # 68 Ethyl radical                                | 25.0 <sup>a</sup>  | 24.8  | 23.3    | 23.9  | 24.6  | 22.3    | 23.7  |
| # 81 Cyclopropenyl, cation                        | 257.0 <sup>a</sup> | 259.4 | 258.0   | 253.8 | 262.2 | 260.0   | 258.3 |
| # 82 Propynyl, cation                             | 281.0 <sup>a</sup> | 276.4 | 275.1   | 269.6 | 280.9 | 278.7   | 275.2 |
| # 89 Allyl, cation                                | 226.0 <sup>a</sup> | 223.7 | 221.5   | 217.8 | 230.7 | 227.3   | 225.5 |
| # 90 Cyclopropyl, cation                          | 235.0 <sup>a</sup> | 223.7 | 221.5   | 217.8 | 230.7 | 227.3   | 225.5 |
| # 91 Propenyl, cation                             | 237.0 <sup>a</sup> | 225.7 | 223.8   | 220.7 | 230.2 | 227.2   | 227.3 |
| # 92 Allyl                                        | 40.0 <sup>a</sup>  | 42.9  | 40.8    | 41.9  | 43.6  | 40.2    | 42.1  |
| # 97 i-Propyl radical                             | 16.8 <sup>a</sup>  | 14.3  | 11.6    | 14.1  | 13.4  | 9.0     | 13.2  |
| # 111 1,2-Butadiene                               | 38.8 <sup>a</sup>  | 38.1  | 35.2    | 38.1  | 37.6  | 33.0    | 38.0  |
| # 113 1-Butyne                                    | 39.5 <sup>a</sup>  | 39.5  | 36.5    | 39.3  | 39.2  | 34.6    | 39.5  |
| # 118 Cyclobutene                                 | 37.5 <sup>a</sup>  | 41.3  | 38.2    | 40.2  | 40.8  | 35.8    | 40.0  |
| # 119 Methyl cyclopropene                         | 58.2 <sup>a</sup>  | 59.7  | 56.7    | 59.7  | 57.3  | 52.7    | 57.3  |
| # 120 Methylene cyclopropane                      | 47.9 <sup>a</sup>  | 45.0  | 42.0    | 45.4  | 43.7  | 39.1    | 44.7  |
| # 122 2-Butenyl, cation                           | 200.0 <sup>a</sup> | 199.8 | 196.4   | 194.2 | 206.2 | 200.8   | 201.7 |
| # 123 Cyclobutyl, cation                          | 213.0 <sup>a</sup> | 214.4 | 210.9   | 209.0 | 224.9 | 219.3   | 220.5 |
| # 126 cis-2-Butene                                | -1.9 <sup>a</sup>  | -2.1  | -6.1    | -2.1  | -2.3  | -8.5    | -2.2  |
| # 133 Isobutyl, cation                            | 176.0 <sup>a</sup> | 158.2 | 153.9   | 155.0 | 163.5 | 156.8   | 162.3 |
| # 134 Isobutyl                                    | 4.5 <sup>a</sup>   | 3.2   | -1.1    | 3.6   | 2.4   | -4.2    | 2.9   |
| # 145 Cyclopentadienyl, anion                     | 21.3 <sup>a</sup>  | 28.2  | 24.6    | 32.2  | 20.9  | 15.2    | 23.0  |
| # 148 1,2-Dimethyl cyclopropene                   | 46.4 <sup>a</sup>  | 52.2  | 48.0    | 51.6  | 49.2  | 42.7    | 49.0  |

... continued on next page ...



Table S71: ... continued from previous page ...

| Species                               | Ref.               | OM2   | OM2-D3T | ODM2  | OM3   | OM3-D3T | ODM3  |
|---------------------------------------|--------------------|-------|---------|-------|-------|---------|-------|
| # 149 1,4-Pentadiene                  | 25.3 <sup>a</sup>  | 25.8  | 21.2    | 25.5  | 26.2  | 19.2    | 25.4  |
| # 150 1,cis-3-Pentadiene              | 19.1 <sup>a</sup>  | 22.4  | 17.8    | 22.1  | 22.8  | 15.6    | 22.1  |
| # 151 1,trans-3-Pentadiene            | 18.1 <sup>a</sup>  | 21.4  | 16.9    | 21.5  | 21.8  | 14.7    | 21.4  |
| # 152 Bicyclo(2.1.0)-pentane          | 37.3 <sup>a</sup>  | 40.1  | 35.4    | 39.5  | 39.0  | 31.6    | 39.3  |
| # 153 Cyclopentene                    | 8.3 <sup>a</sup>   | 6.8   | 1.9     | 7.0   | 5.7   | -1.9    | 5.5   |
| # 154 Isoprene                        | 18.0 <sup>a</sup>  | 21.0  | 16.3    | 21.3  | 22.1  | 14.8    | 21.9  |
| # 155 Methylene cyclobutane           | 29.1 <sup>a</sup>  | 25.4  | 20.8    | 24.9  | 25.6  | 18.3    | 25.5  |
| # 158 Cyclopentyl, cation             | 188.0 <sup>a</sup> | 183.8 | 178.5   | 179.4 | 189.3 | 181.0   | 186.8 |
| # 159 2-Methyl-2-butene               | -9.9 <sup>a</sup>  | -11.6 | -17.2   | -11.5 | -11.4 | -19.9   | -11.3 |
| # 160 cis-2-Pentene                   | -6.1 <sup>a</sup>  | -6.9  | -11.8   | -7.1  | -7.2  | -15.6   | -7.3  |
| # 161 cis-Dimethylcyclopropane        | 1.3 <sup>a</sup>   | 0.6   | -5.0    | 1.1   | 0.1   | -8.4    | 1.1   |
| # 162 Cyclopentane                    | -18.3 <sup>a</sup> | -19.7 | -25.5   | -19.9 | -20.8 | -29.8   | -20.3 |
| # 163 trans-2-Pentene                 | -7.9 <sup>a</sup>  | -8.3  | -13.5   | -8.3  | -8.6  | -16.6   | -8.6  |
| # 164 Neopentyl, anion                | 3.2 <sup>a</sup>   | 5.3   | -0.8    | 6.3   | 2.9   | -6.3    | 5.1   |
| # 165 Isopentane                      | -36.8 <sup>a</sup> | -35.9 | -42.4   | -36.1 | -35.5 | -45.4   | -35.5 |
| # 166 n-Pentane                       | -35.1 <sup>a</sup> | -34.7 | -40.8   | -34.7 | -35.2 | -44.6   | -34.9 |
| # 171 C6H5 radical                    | 74.3 <sup>a</sup>  | 71.5  | 67.0    | 72.9  | 70.4  | 63.2    | 72.4  |
| # 176 (E)-1,3,5-Hexatriene            | 40.1 <sup>a</sup>  | 44.8  | 39.7    | 44.5  | 45.8  | 37.9    | 44.7  |
| # 177 (Z)-1,3,5-Hexatriene            | 41.1 <sup>a</sup>  | 46.7  | 41.5    | 46.8  | 47.7  | 39.5    | 47.0  |
| # 178 1,3-Cyclohexadiene              | 25.4 <sup>a</sup>  | 25.9  | 20.0    | 26.5  | 24.8  | 15.6    | 24.9  |
| # 179 1,4-Cyclohexadiene              | 25.0 <sup>a</sup>  | 26.8  | 21.0    | 26.8  | 24.8  | 15.8    | 24.6  |
| # 180 1,2-Dimethylcyclobutene         | 19.8 <sup>a</sup>  | 21.4  | 15.3    | 21.3  | 20.9  | 11.7    | 21.2  |
| # 181 1,5-Hexadiene                   | 20.1 <sup>a</sup>  | 21.0  | 14.9    | 20.6  | 21.2  | 11.9    | 20.2  |
| # 182 1-Methyl cyclopentene           | -1.0 <sup>a</sup>  | -2.8  | -9.2    | -3.0  | -3.7  | -13.7   | -3.7  |
| # 183 3-Methyl cyclopentene           | 2.3 <sup>a</sup>   | -0.2  | -6.8    | -0.3  | -0.7  | -10.9   | -0.9  |
| # 184 4-Methyl cyclopentene           | 3.5 <sup>a</sup>   | -0.4  | -7.1    | -0.6  | -1.1  | -11.3   | -1.3  |
| # 185 Bicyclopropyl                   | 30.9 <sup>a</sup>  | 30.7  | 24.7    | 30.9  | 30.2  | 21.0    | 31.9  |
| # 188 Cyclohexyl, cation              | 177.0 <sup>a</sup> | 171.1 | 163.7   | 166.2 | 179.5 | 168.0   | 176.9 |
| # 189 1-Hexene                        | -10.1 <sup>a</sup> | -9.1  | -16.0   | -9.4  | -9.4  | -19.9   | -9.9  |
| # 190 2,3-Dimethyl-1-butene           | -15.7 <sup>a</sup> | -14.8 | -22.3   | -14.9 | -13.5 | -25.0   | -13.9 |
| # 191 2,3-Dimethyl-2-butene           | -16.8 <sup>a</sup> | -19.8 | -27.2   | -19.7 | -18.9 | -30.2   | -18.9 |
| # 192 (Z)-3-Methyl-2-pentene          | -14.8 <sup>a</sup> | -15.0 | -22.4   | -15.0 | -14.6 | -25.8   | -14.6 |
| # 193 4-Methyl-1-pentene              | -11.8 <sup>a</sup> | -10.8 | -18.2   | -11.5 | -10.3 | -21.4   | -11.3 |
| # 196 2,2-Dimethyl butane             | -44.3 <sup>a</sup> | -42.8 | -51.6   | -43.4 | -40.7 | -54.0   | -41.5 |
| # 197 2,3-Dimethyl butane             | -42.5 <sup>a</sup> | -41.1 | -49.7   | -41.7 | -39.8 | -52.8   | -40.4 |
| # 198 2-Methyl pentane                | -41.7 <sup>a</sup> | -40.4 | -48.5   | -40.9 | -40.3 | -52.5   | -40.6 |
| # 199 3-Methyl pentane                | -41.1 <sup>a</sup> | -39.9 | -48.2   | -40.2 | -39.5 | -52.0   | -39.9 |
| # 200 n-Hexane                        | -39.9 <sup>a</sup> | -39.2 | -46.9   | -39.4 | -40.0 | -51.6   | -39.9 |
| # 203 Benzyl, cation                  | 212.0 <sup>a</sup> | 214.6 | 208.4   | 210.2 | 221.7 | 212.0   | 217.8 |
| # 204 Tropylium, cation               | 209.0 <sup>a</sup> | 206.2 | 200.0   | 202.4 | 211.2 | 201.4   | 208.9 |
| # 205 Cycloheptatriene                | 43.2 <sup>a</sup>  | 46.7  | 39.8    | 46.7  | 46.1  | 35.4    | 45.8  |
| # 206 Norbornadiene                   | 59.7 <sup>a</sup>  | 51.8  | 44.8    | 51.4  | 52.0  | 41.1    | 50.6  |
| # 207 Toluene                         | 12.0 <sup>a</sup>  | 9.5   | 2.9     | 9.7   | 9.6   | -0.6    | 9.9   |
| # 208 1,2-Dimethyl cyclopentene       | -9.9 <sup>a</sup>  | -12.1 | -20.3   | -11.7 | -12.5 | -25.0   | -12.1 |
| # 209 1-Ethyl cyclopentene            | -6.0 <sup>a</sup>  | -6.9  | -15.1   | -6.7  | -7.8  | -20.2   | -7.3  |
| # 210 1-Methyl cyclohexene            | -19.4 <sup>a</sup> | -9.2  | -17.8   | -9.2  | -10.3 | -23.3   | -10.3 |
| # 211 Norbornane                      | -12.4 <sup>a</sup> | -12.5 | -21.5   | -13.3 | -12.4 | -26.3   | -13.2 |
| # 212 1,1-Dimethyl cyclopentane       | -33.0 <sup>a</sup> | -34.4 | -44.3   | -35.8 | -34.4 | -49.1   | -34.8 |
| # 213 1,2-cis-Dimethyl cyclopentane   | -31.0 <sup>a</sup> | -31.7 | -41.6   | -32.1 | -31.9 | -46.6   | -31.8 |
| # 214 1,2-trans-Dimethyl cyclopentane | -32.7 <sup>a</sup> | -33.9 | -43.4   | -34.5 | -34.1 | -48.5   | -34.4 |
| # 215 1,3-cis-Dimethyl cyclopentane   | -31.9 <sup>a</sup> | -33.7 | -43.1   | -34.8 | -34.1 | -48.2   | -34.8 |
| # 216 1-Heptene                       | -14.9 <sup>a</sup> | -13.7 | -22.1   | -14.2 | -14.2 | -27.0   | -14.9 |
| # 217 Ethyl cyclopentane              | -30.4 <sup>a</sup> | -31.1 | -40.5   | -31.4 | -32.0 | -46.1   | -31.8 |
| # 218 Methyl-cyclohexane              | -37.0 <sup>a</sup> | -33.9 | -43.7   | -34.7 | -34.8 | -49.5   | -35.6 |
| # 219 2,2,3-Trimethyl butane          | -48.7 <sup>a</sup> | -47.5 | -58.6   | -48.5 | -44.4 | -60.9   | -45.8 |
| # 220 2,2-Dimethyl pentane            | -49.3 <sup>a</sup> | -47.3 | -57.7   | -48.2 | -45.5 | -61.1   | -46.6 |
| # 221 2,3-Dimethyl pentane            | -47.6 <sup>a</sup> | -44.8 | -55.4   | -45.6 | -43.8 | -59.5   | -44.7 |
| # 222 2,4-Dimethyl pentane            | -48.3 <sup>a</sup> | -44.7 | -54.9   | -46.3 | -44.2 | -59.4   | -45.9 |
| # 223 2-Methyl hexane                 | -46.6 <sup>a</sup> | -45.0 | -54.6   | -45.6 | -45.1 | -59.6   | -45.7 |
| # 224 3,3-Dimethyl pentane            | -48.2 <sup>a</sup> | -45.7 | -56.5   | -46.3 | -43.5 | -59.6   | -44.4 |
| # 225 3-Ethyl pentane                 | -45.3 <sup>a</sup> | -42.5 | -52.8   | -43.2 | -42.5 | -57.8   | -43.3 |
| # 226 3-Methyl hexane                 | -46.0 <sup>a</sup> | -44.4 | -54.3   | -45.0 | -44.4 | -59.1   | -45.0 |
| # 227 n-Heptane                       | -44.8 <sup>a</sup> | -43.8 | -53.0   | -44.2 | -44.8 | -58.7   | -45.0 |
| # 228 Cubane                          | 148.7 <sup>a</sup> | 144.6 | 137.2   | 141.2 | 146.4 | 134.8   | 144.1 |
| # 229 Cyclooctatetraene               | 70.7 <sup>a</sup>  | 75.2  | 67.2    | 74.3  | 73.9  | 61.6    | 72.1  |

... continued on next page ...

Table S71: ... continued from previous page ...

| Species                                         | Ref.               | OM2   | OM2-D3T | ODM2  | OM3   | OM3-D3T | ODM3  |
|-------------------------------------------------|--------------------|-------|---------|-------|-------|---------|-------|
| # 230 Styrene                                   | 35.3 <sup>a</sup>  | 34.7  | 27.3    | 35.4  | 35.6  | 24.1    | 35.4  |
| # 231 Ethylbenzene                              | 7.2 <sup>a</sup>   | 4.8   | -3.5    | 5.4   | 5.0   | -7.7    | 5.1   |
| # 232 m-Xylene                                  | 4.1 <sup>a</sup>   | 0.2   | -7.9    | 0.3   | 0.7   | -11.9   | 0.9   |
| # 233 o-Xylene                                  | 4.6 <sup>a</sup>   | 0.3   | -8.1    | 0.9   | 1.3   | -11.7   | 1.4   |
| # 234 p-Xylene                                  | 4.3 <sup>a</sup>   | 0.3   | -7.8    | 0.4   | 0.8   | -11.8   | 1.0   |
| # 235 1,5-Cyclooctadiene                        | 13.7 <sup>a</sup>  | 24.8  | 14.7    | 23.8  | 23.2  | 7.9     | 21.6  |
| # 236 4-Vinyl cyclohexene                       | 16.6 <sup>a</sup>  | 18.7  | 9.2     | 18.1  | 18.3  | 3.9     | 17.0  |
| # 237 1-Octyne                                  | 19.3 <sup>a</sup>  | 20.9  | 11.9    | 20.0  | 19.8  | 6.2     | 19.2  |
| # 238 2,5-Dimethyl 2,4-hexadiene                | -4.6 <sup>a</sup>  | -3.9  | -13.4   | -3.7  | -3.4  | -17.7   | -3.6  |
| # 239 2-Octyne                                  | 15.2 <sup>a</sup>  | 16.0  | 7.5     | 15.6  | 14.2  | 1.2     | 14.6  |
| # 240 3,4-Dimethyl-(E,E)-2,4-hexadiene          | -0.5 <sup>a</sup>  | -2.6  | -12.5   | -2.8  | -1.5  | -16.4   | -2.1  |
| # 241 3,4-Dimethyl-(E,Z)-2,4-hexadiene          | 0.7 <sup>a</sup>   | -2.7  | -12.8   | -3.1  | -1.8  | -16.8   | -2.5  |
| # 242 3,4-Dimethyl-(Z,Z)-2,4-hexadiene          | -0.9 <sup>a</sup>  | -3.1  | -13.5   | -3.8  | -2.1  | -17.4   | -3.1  |
| # 243 3-Octyne                                  | 14.9 <sup>a</sup>  | 15.5  | 7.1     | 15.3  | 14.2  | 1.3     | 14.8  |
| # 244 4-Octyne                                  | 14.4 <sup>a</sup>  | 15.2  | 6.8     | 14.4  | 14.0  | 1.1     | 14.1  |
| # 245 Bicyclo(2.2.2)-octane                     | -24.1 <sup>a</sup> | -22.2 | -33.6   | -22.8 | -23.4 | -40.5   | -23.9 |
| # 246 Bicyclo-2,2,2-octane                      | -23.7 <sup>a</sup> | -22.2 | -33.6   | -22.3 | -23.4 | -40.5   | -23.3 |
| # 247 1-Octene                                  | -19.8 <sup>a</sup> | -18.3 | -28.2   | -18.9 | -19.1 | -34.0   | -20.0 |
| # 248 Ethylcyclohexane                          | -41.0 <sup>a</sup> | -38.0 | -49.5   | -38.9 | -38.9 | -56.2   | -40.0 |
| # 249 2,2,3,3-Tetramethyl butane                | -54.0 <sup>a</sup> | -53.4 | -67.1   | -54.9 | -48.1 | -68.3   | -50.3 |
| # 250 2,2,3,3-Tetramethylbutane                 | -53.8 <sup>a</sup> | -53.4 | -67.0   | -55.4 | -48.1 | -68.3   | -50.9 |
| # 251 2,2,3-Trimethyl pentane                   | -52.6 <sup>a</sup> | -51.3 | -64.3   | -52.6 | -48.3 | -67.5   | -50.1 |
| # 252 2,2,4-Trimethyl pentane                   | -53.6 <sup>a</sup> | -51.6 | -64.2   | -53.2 | -49.4 | -68.1   | -51.4 |
| # 253 2,2-Dimethyl hexane                       | -53.7 <sup>a</sup> | -51.8 | -63.8   | -53.0 | -50.3 | -68.2   | -51.7 |
| # 254 2,3,3-Trimethyl pentane                   | -51.7 <sup>a</sup> | -50.2 | -63.3   | -51.2 | -46.9 | -66.4   | -48.5 |
| # 255 2,3,4-Trimethyl pentane                   | -52.0 <sup>a</sup> | -48.3 | -61.1   | -49.4 | -46.7 | -65.6   | -48.1 |
| # 256 2,3-Dimethyl hexane                       | -51.1 <sup>a</sup> | -49.4 | -61.5   | -50.4 | -48.6 | -66.6   | -49.8 |
| # 257 2,4-Dimethyl hexane                       | -52.4 <sup>a</sup> | -50.1 | -62.1   | -51.3 | -49.4 | -67.2   | -50.9 |
| # 258 2,5-Dimethyl hexane                       | -53.2 <sup>a</sup> | -50.7 | -62.4   | -51.8 | -50.2 | -67.6   | -51.5 |
| # 259 2-Methyl heptane                          | -51.5 <sup>a</sup> | -49.5 | -60.7   | -50.4 | -50.0 | -66.7   | -50.8 |
| # 260 3,3-Dimethyl hexane                       | -52.6 <sup>a</sup> | -50.2 | -62.6   | -51.1 | -48.3 | -66.7   | -49.6 |
| # 261 3,4-Dimethyl hexane                       | -50.9 <sup>a</sup> | -48.1 | -60.3   | -48.9 | -47.0 | -65.2   | -48.2 |
| # 262 3-Ethyl hexane                            | -50.4 <sup>a</sup> | -47.0 | -58.9   | -48.1 | -47.3 | -64.9   | -48.4 |
| # 263 3-Ethyl-2-methyl pentane                  | -50.5 <sup>a</sup> | -47.3 | -59.7   | -48.4 | -46.4 | -64.8   | -47.8 |
| # 264 3-Ethyl-3-methyl pentane                  | -51.4 <sup>a</sup> | -46.7 | -59.7   | -47.4 | -44.5 | -63.7   | -45.6 |
| # 265 3-Methyl heptane                          | -50.8 <sup>a</sup> | -49.0 | -60.4   | -49.8 | -49.2 | -66.3   | -50.1 |
| # 266 4-Methyl heptane                          | -50.7 <sup>a</sup> | -48.9 | -60.4   | -49.8 | -49.2 | -66.3   | -50.1 |
| # 267 n-Octane                                  | -49.9 <sup>a</sup> | -48.3 | -59.0   | -48.9 | -49.7 | -65.8   | -50.1 |
| # 270 alpha-Methyl styrene                      | 28.3 <sup>a</sup>  | 25.8  | 16.5    | 26.5  | 27.1  | 13.0    | 27.0  |
| # 271 Cyclopropyl benzene                       | 36.0 <sup>a</sup>  | 34.8  | 25.8    | 35.8  | 35.1  | 21.3    | 36.1  |
| # 272 1,3,5-Trimethyl cyclohexane               | -51.5 <sup>a</sup> | -47.5 | -61.0   | -49.6 | -47.3 | -67.4   | -49.7 |
| # 273 cis-cis-trans-1,3,5-Trimethyl cyclohexane | -49.4 <sup>a</sup> | -45.8 | -59.6   | -47.5 | -45.4 | -66.0   | -47.5 |
| # 274 3,3-Diethylpentane                        | -55.4 <sup>a</sup> | -51.5 | -66.7   | -52.6 | -48.8 | -71.2   | -50.5 |
| # 275 n-Nonane                                  | -54.7 <sup>a</sup> | -52.9 | -65.1   | -53.7 | -54.5 | -72.9   | -55.1 |
| # 278 Azulene                                   | 73.5 <sup>a</sup>  | 83.4  | 74.0    | 82.7  | 82.5  | 68.1    | 81.6  |
| # 281 1,4-Dicyclopropylbuta-1,3-diyne           | 134.3 <sup>a</sup> | 148.8 | 141.1   | 148.4 | 145.3 | 133.4   | 148.5 |
| # 282 1-Butynyl benzene                         | 59.4 <sup>a</sup>  | 60.3  | 51.4    | 60.8  | 59.8  | 46.1    | 60.8  |
| # 283 2a,4a,6a,6b-Tetrahydrocyclopentapentalene | 53.1 <sup>a</sup>  | 52.0  | 40.9    | 51.2  | 52.7  | 35.7    | 50.8  |
| # 284 Bulvalene                                 | 79.8 <sup>a</sup>  | 84.5  | 73.3    | 85.5  | 83.5  | 66.5    | 84.3  |
| # 285 Diisopropenyldiacetylene                  | 118.1 <sup>a</sup> | 129.8 | 121.9   | 128.9 | 127.5 | 115.4   | 128.6 |
| # 286 Tricyclo[6.2.0.0]deca-1(8),2,6-triene     | 74.0 <sup>a</sup>  | 73.7  | 64.2    | 73.2  | 74.2  | 59.6    | 74.0  |
| # 287 1,2,6,7-Cyclodecatetraene                 | 85.1 <sup>a</sup>  | 87.9  | 76.4    | 85.4  | 85.1  | 67.8    | 82.8  |
| # 288 Dispiro[2.2.2.2]deca-4,9-diene            | 72.3 <sup>a</sup>  | 71.3  | 60.5    | 71.4  | 72.0  | 55.6    | 72.5  |
| # 289 Tetralin                                  | 6.2 <sup>a</sup>   | 3.2   | -8.3    | 3.5   | 2.9   | -14.7   | 2.6   |
| # 290 (1-Methylpropyl) benzene                  | -4.2 <sup>a</sup>  | -5.7  | -17.8   | -5.7  | -4.7  | -22.9   | -5.5  |
| # 291 (2-Methylpropyl) benzene                  | -5.2 <sup>a</sup>  | -6.1  | -18.3   | -6.5  | -5.4  | -23.7   | -6.6  |
| # 292 1,2,3,4-Tetramethyl benzene               | -8.6 <sup>a</sup>  | -15.3 | -27.6   | -14.7 | -12.7 | -31.3   | -12.6 |
| # 293 1,2,3,4-Tetramethylfulvene                | 19.9 <sup>a</sup>  | 18.9  | 7.0     | 19.5  | 20.9  | 3.0     | 21.0  |
| # 294 1,2,3,5-Tetramethyl benzene               | -10.3 <sup>a</sup> | -16.7 | -28.7   | -16.9 | -14.6 | -32.8   | -14.6 |
| # 295 1,2,4,5-Tetramethyl benzene               | -11.3 <sup>a</sup> | -17.8 | -29.9   | -17.6 | -15.7 | -33.9   | -16.0 |
| # 296 tert-Butyl benzene                        | -5.4 <sup>a</sup>  | -7.8  | -20.5   | -7.9  | -4.8  | -23.8   | -5.8  |
| # 297 Tetrahydrotriquinacene                    | 3.0 <sup>a</sup>   | -2.0  | -15.3   | -3.0  | -2.2  | -22.1   | -3.2  |
| # 298 1,2,3,4,5-Pentamethyl-1,3-cyclopentadiene | -5.9 <sup>a</sup>  | -10.3 | -23.4   | -10.3 | -8.7  | -28.2   | -9.2  |
| # 299 Adamantane                                | -31.9 <sup>a</sup> | -30.4 | -45.6   | -31.5 | -30.2 | -53.1   | -32.0 |
| # 300 Camphene                                  | -6.8 <sup>a</sup>  | -6.1  | -20.7   | -7.8  | -2.4  | -24.2   | -5.0  |

... continued on next page ...

Table S71: ... continued from previous page ...

| Species                                                        | Ref.               | OM2   | OM2-D3T | ODM2  | OM3   | OM3-D3T | ODM3  |
|----------------------------------------------------------------|--------------------|-------|---------|-------|-------|---------|-------|
| # 301 Perhydrotriquinacene                                     | -24.5 <sup>a</sup> | -28.5 | -43.0   | -29.6 | -29.1 | -50.6   | -29.7 |
| # 302 1-Methyl-4-(1-methylethyl)-cyclohexene                   | -26.5 <sup>a</sup> | -20.9 | -36.0   | -22.1 | -21.2 | -43.6   | -22.9 |
| # 303 4-Methyl-1-(1-methylethyl)-cyclohexene                   | -26.6 <sup>a</sup> | -26.5 | -40.7   | -27.6 | -26.1 | -47.3   | -27.7 |
| # 304 cis-Decalin                                              | -40.5 <sup>a</sup> | -29.4 | -44.6   | -30.5 | -31.2 | -53.8   | -32.2 |
| # 305 Spiro(4-5)decane                                         | -34.7 <sup>a</sup> | -36.5 | -51.7   | -37.9 | -36.7 | -59.4   | -38.2 |
| # 306 trans-Decalin                                            | -43.5 <sup>a</sup> | -38.5 | -53.6   | -40.5 | -39.8 | -62.3   | -42.3 |
| # 307 (E)-2,2,5,5-Tetramethyl-3-hexene                         | -39.9 <sup>a</sup> | -39.7 | -54.8   | -41.8 | -35.3 | -57.6   | -38.1 |
| # 308 (Z)-2,2,5,5-Tetramethyl-3-hexene                         | -30.3 <sup>a</sup> | -29.6 | -45.6   | -31.5 | -25.4 | -49.0   | -28.0 |
| # 309 1-Decene                                                 | -29.8 <sup>a</sup> | -27.4 | -40.3   | -28.4 | -28.7 | -48.2   | -30.2 |
| # 310 Butyl cyclohexane                                        | -51.0 <sup>a</sup> | -47.1 | -61.7   | -48.5 | -48.6 | -70.4   | -50.2 |
| # 311 Pentyl cyclopentane                                      | -45.2 <sup>a</sup> | -44.8 | -58.8   | -45.7 | -46.5 | -67.4   | -47.6 |
| # 312 2,2,5,5-Tetramethylhexane                                | -68.0 <sup>a</sup> | -64.3 | -80.8   | -66.6 | -60.5 | -84.7   | -63.5 |
| # 313 3,3,4,4-Tetramethylhexane                                | -63.5 <sup>a</sup> | -58.3 | -76.2   | -59.9 | -52.6 | -78.9   | -55.3 |
| # 314 n-Decane                                                 | -59.7 <sup>a</sup> | -57.5 | -71.2   | -58.4 | -59.3 | -79.9   | -60.2 |
| # 315 Pentamethylbenzene                                       | -16.1 <sup>a</sup> | -23.2 | -37.4   | -22.6 | -19.9 | -41.3   | -20.0 |
| # 316 1,1,4-Trimethylcycloheptane                              | -50.3 <sup>a</sup> | -42.5 | -61.0   | -45.4 | -43.0 | -70.2   | -46.6 |
| # 317 Hexyl cyclopentane                                       | -50.1 <sup>a</sup> | -49.3 | -64.8   | -50.4 | -51.3 | -74.4   | -52.1 |
| # 318 Pentyl cyclohexane                                       | -55.9 <sup>a</sup> | -51.6 | -67.8   | -53.3 | -53.4 | -77.5   | -55.3 |
| # 319 Undecane                                                 | -64.6 <sup>a</sup> | -62.0 | -77.3   | -63.2 | -64.2 | -87.0   | -65.3 |
| # 320 Acenaphthylene                                           | 61.6 <sup>a</sup>  | 67.0  | 55.6    | 68.0  | 67.9  | 50.3    | 67.5  |
| # 321 Biphenylene                                              | 100.5 <sup>a</sup> | 103.7 | 93.3    | 105.4 | 103.2 | 87.1    | 104.4 |
| # 322 Acenaphthene                                             | 37.4 <sup>a</sup>  | 33.9  | 21.6    | 34.7  | 34.3  | 15.3    | 34.2  |
| # 325 Hexamethylbenzene                                        | -18.5 <sup>a</sup> | -28.0 | -44.5   | -27.0 | -23.7 | -48.4   | -23.7 |
| # 326 Hexylcyclohexane                                         | -60.8 <sup>a</sup> | -56.2 | -73.9   | -58.0 | -58.2 | -84.6   | -60.4 |
| # 327 n-Duodecane                                              | -69.2 <sup>a</sup> | -66.6 | -83.4   | -67.9 | -69.0 | -94.1   | -70.4 |
| # 331 Fluorene                                                 | 41.8 <sup>a</sup>  | 40.7  | 27.6    | 41.6  | 41.3  | 21.3    | 41.2  |
| # 333 Tri-t-butylmethane                                       | -56.2 <sup>a</sup> | -49.7 | -75.9   | -52.6 | -41.3 | -79.2   | -46.1 |
| # 334 Tridecane                                                | -74.4 <sup>a</sup> | -71.1 | -89.4   | -72.7 | -73.8 | -101.2  | -75.4 |
| # 335 Anthracene                                               | 55.2 <sup>a</sup>  | 55.5  | 41.4    | 56.4  | 57.5  | 35.8    | 57.0  |
| # 336 Diphenylethyne                                           | 92.0 <sup>a</sup>  | 95.6  | 83.2    | 96.4  | 95.7  | 76.6    | 96.5  |
| # 337 Phenanthrene                                             | 49.5 <sup>a</sup>  | 46.8  | 32.4    | 48.0  | 49.1  | 27.0    | 48.8  |
| # 338 9,10-Dihydro-phenanthrene                                | 37.1 <sup>a</sup>  | 31.6  | 16.1    | 32.4  | 33.2  | 9.6     | 32.5  |
| # 339 9-Methyl-9H-fluorene                                     | 35.4 <sup>a</sup>  | 33.8  | 18.5    | 34.3  | 35.4  | 12.4    | 34.7  |
| # 340 Octalene                                                 | 131.8 <sup>a</sup> | 134.3 | 117.9   | 131.6 | 133.3 | 108.9   | 129.0 |
| # 341 Stilbene                                                 | 53.4 <sup>a</sup>  | 55.8  | 41.8    | 56.8  | 56.9  | 35.4    | 56.2  |
| # 342 1,2,3,4-Tetrahydrophenanthrene                           | 22.1 <sup>a</sup>  | 20.2  | 3.7     | 20.7  | 21.4  | -3.5    | 20.9  |
| # 343 4,4'-Dimethylbiphenyl                                    | 26.6 <sup>a</sup>  | 20.5  | 5.2     | 20.1  | 22.4  | -0.7    | 21.9  |
| # 344 Bibenzyl                                                 | 32.4 <sup>a</sup>  | 30.3  | 15.1    | 30.8  | 30.6  | 7.5     | 29.6  |
| # 346 1,4,5,8-Tetramethylnaphthalene                           | 19.5 <sup>a</sup>  | 11.2  | -6.5    | 12.1  | 15.5  | -11.1   | 15.3  |
| # 347 1,2,3,4,5,6,7,8-Octahydro-anthracene                     | -8.9 <sup>a</sup>  | -12.0 | -30.3   | -12.5 | -12.5 | -39.9   | -13.7 |
| # 348 Diadamantane                                             | -34.9 <sup>a</sup> | -35.4 | -58.3   | -38.1 | -33.6 | -67.7   | -37.9 |
| # 349 1,3,5,7-Tetramethyladamantane                            | -68.0 <sup>a</sup> | -64.8 | -89.0   | -69.6 | -58.6 | -94.2   | -65.3 |
| # 350 (E)-3,4-Di-tert-butyl-3-hexene                           | -40.2 <sup>a</sup> | -43.6 | -69.8   | -46.0 | -35.2 | -73.2   | -39.5 |
| # 351 Cyclotetradecane                                         | -57.2 <sup>a</sup> | -50.8 | -74.5   | -54.9 | -55.0 | -89.1   | -59.9 |
| # 352 n-Nonylcyclopentane                                      | -64.8 <sup>a</sup> | -63.0 | -83.1   | -64.7 | -65.8 | -95.7   | -67.3 |
| # 353 Octylcyclohexane                                         | -70.7 <sup>a</sup> | -65.3 | -86.1   | -67.5 | -67.9 | -98.8   | -70.5 |
| # 354 3,3,4,4-Tetraethylhexane                                 | -63.5 <sup>a</sup> | -54.0 | -82.1   | -56.6 | -48.4 | -88.7   | -52.7 |
| # 355 Octamethylhexane                                         | -59.3 <sup>a</sup> | -58.8 | -87.9   | -62.0 | -46.4 | -88.6   | -51.8 |
| # 356 Tetradecane                                              | -79.4 <sup>a</sup> | -75.7 | -95.5   | -77.4 | -78.7 | -108.3  | -80.5 |
| # 357 4-Methylphenanthrene                                     | 46.8 <sup>a</sup>  | 43.3  | 26.7    | 44.4  | 46.5  | 21.3    | 46.2  |
| # 358 1-Methyldiadamantane                                     | -39.8 <sup>a</sup> | -42.3 | -67.9   | -45.8 | -38.4 | -76.3   | -43.9 |
| # 359 3-Methyladamantane                                       | -37.6 <sup>a</sup> | -40.9 | -66.2   | -44.2 | -38.2 | -75.6   | -43.4 |
| # 360 4-Methyldiadamantane                                     | -43.5 <sup>a</sup> | -44.0 | -69.2   | -47.7 | -40.7 | -78.0   | -46.2 |
| # 361 6-(1,1-dimethylethyl)-2,3-dihydro-1,1-dimethyl-1H-Indene | -24.9 <sup>a</sup> | -32.1 | -53.8   | -33.8 | -27.0 | -59.0   | -29.8 |
| # 362 n-Nonylcyclohexane                                       | -75.6 <sup>a</sup> | -69.9 | -92.1   | -72.3 | -72.8 | -105.8  | -75.6 |
| # 363 Pentadecane                                              | -84.8 <sup>a</sup> | -80.3 | -101.6  | -82.1 | -83.5 | -115.3  | -85.6 |
| # 364 Fluoranthene                                             | 69.8 <sup>a</sup>  | 68.7  | 52.5    | 69.9  | 70.4  | 45.7    | 70.2  |
| # 365 Pyrene                                                   | 53.9 <sup>a</sup>  | 54.4  | 37.6    | 55.4  | 57.7  | 32.1    | 57.1  |
| # 366 2,7-Dimethylphenanthrene                                 | 34.2 <sup>a</sup>  | 28.2  | 10.5    | 29.0  | 31.2  | 4.3     | 30.6  |
| # 367 4,5,9,10-Tetrahydropyrene                                | 21.6 <sup>a</sup>  | 23.8  | 4.8     | 24.1  | 25.4  | -3.1    | 24.2  |
| # 368 9,10-Dimethylphenanthrene                                | 40.0 <sup>a</sup>  | 32.9  | 14.3    | 34.5  | 36.8  | 8.7     | 36.8  |
| # 369 (2.2)Metaparacyclophane                                  | 52.2 <sup>a</sup>  | 43.9  | 20.7    | 39.1  | 45.5  | 11.3    | 38.0  |
| # 370 [2.2]Metacyclophane                                      | 40.7 <sup>a</sup>  | 45.1  | 22.4    | 41.0  | 45.8  | 12.5    | 38.7  |
| # 371 [2.2]Paracyclophane                                      | 58.5 <sup>a</sup>  | 49.6  | 25.9    | 43.7  | 50.6  | 15.8    | 41.7  |
| # 372 1,2,3,6,7,8-Hexahydropyrene                              | 9.7 <sup>a</sup>   | 11.6  | -9.8    | 10.0  | 12.3  | -19.7   | 9.1   |

... continued on next page ...

Table S71: ... continued from previous page ...

| Species                                                        | Ref.                | OM2    | OM2-D3T | ODM2   | OM3    | OM3-D3T | ODM3   |
|----------------------------------------------------------------|---------------------|--------|---------|--------|--------|---------|--------|
| # 373 Tricyclo[8.2.2.2]-hexadecane                             | -36.4 <sup>a</sup>  | -9.7   | -39.7   | -12.8  | -14.7  | -57.9   | -18.8  |
| # 374 1-Hexadecene                                             | -59.4 <sup>a</sup>  | -54.7  | -76.8   | -56.9  | -57.8  | -90.7   | -60.6  |
| # 375 Decylcyclohexane                                         | -80.5 <sup>a</sup>  | -74.4  | -98.2   | -77.0  | -77.6  | -112.9  | -80.7  |
| # 376 n-Undecylcyclopentane                                    | -74.7 <sup>a</sup>  | -72.1  | -95.2   | -74.2  | -75.5  | -109.8  | -77.5  |
| # 377 n-Dodecylcyclopentane                                    | -79.6 <sup>a</sup>  | -76.7  | -101.3  | -78.9  | -80.3  | -116.9  | -82.0  |
| # 378 Undecylcyclohexane                                       | -85.4 <sup>a</sup>  | -79.0  | -104.3  | -81.8  | -82.4  | -120.0  | -85.8  |
| # 379 Heptadecane                                              | -94.2 <sup>a</sup>  | -89.4  | -113.7  | -91.6  | -93.2  | -129.5  | -95.7  |
| # 380 p-Terphenyl                                              | 66.6 <sup>a</sup>   | 59.2   | 40.1    | 60.4   | 61.8   | 32.8    | 61.0   |
| # 381 2,5-Diphenyl-1,5-hexadiene                               | 68.0 <sup>a</sup>   | 62.7   | 40.4    | 61.6   | 65.7   | 33.1    | 62.4   |
| # 382 3,4,5,6-Tetramethylphenanthrene                          | 38.3 <sup>a</sup>   | 22.9   | -0.4    | 22.4   | 28.8   | -5.9    | 26.5   |
| # 383 [3.3]Paracyclophane                                      | 30.9 <sup>a</sup>   | 24.0   | -3.9    | 17.2   | 24.0   | -16.5   | 14.6   |
| # 384 1,1'-(1,1,2,2-Tetramethyl-1,2-ethanediyl)bis-benzene     | 13.7 <sup>a</sup>   | 9.4    | -17.7   | 7.0    | 17.3   | -22.4   | 12.0   |
| # 385 Dodecylcyclohexane                                       | -90.4 <sup>a</sup>  | -83.6  | -110.4  | -86.5  | -87.3  | -127.1  | -90.8  |
| # 386 n-Tridecylcyclopentane                                   | -84.6 <sup>a</sup>  | -81.3  | -107.4  | -83.7  | -85.1  | -124.0  | -87.6  |
| # 387 1,1,2,2-Tetra-t-butylethane                              | -59.9 <sup>a</sup>  | -50.3  | -89.9   | -56.6  | -40.0  | -96.5   | -49.2  |
| # 388 Octadecane                                               | -99.1 <sup>a</sup>  | -93.9  | -119.8  | -96.4  | -98.0  | -136.6  | -100.8 |
| # 392 2,6-Diphenyl-1,6-heptadiene                              | 61.9 <sup>a</sup>   | 58.7   | 35.6    | 58.0   | 61.3   | 27.3    | 58.2   |
| # 393 n-Tetradecylcyclopentane                                 | -89.5 <sup>a</sup>  | -85.8  | -113.5  | -88.4  | -90.0  | -131.1  | -92.7  |
| # 394 n-Tridecylcyclohexane                                    | -95.3 <sup>a</sup>  | -88.1  | -116.5  | -91.3  | -92.1  | -134.2  | -95.9  |
| # 395 Nonadecane                                               | -104.0 <sup>a</sup> | -98.5  | -125.9  | -101.1 | -102.9 | -143.7  | -105.9 |
| # 396 9,10-Dihydro-9,10[1',2']benzanthracene                   | 76.9 <sup>a</sup>   | 65.3   | 42.3    | 65.7   | 68.6   | 34.1    | 65.7   |
| # 397 3,9-Dimethylbenz[a]anthracene                            | 45.1 <sup>a</sup>   | 46.7   | 24.3    | 47.4   | 50.9   | 17.0    | 49.6   |
| # 398 5,6-Dimethyl chrysene                                    | 62.7 <sup>a</sup>   | 52.2   | 28.3    | 53.4   | 57.8   | 21.8    | 56.7   |
| # 399 9,10-Dimethyl-1,2-benzanthracene                         | 66.3 <sup>a</sup>   | 57.8   | 33.8    | 59.0   | 63.4   | 27.4    | 62.5   |
| # 400 1,3,5-Tri-tert-butyl pentalene                           | 3.4 <sup>a</sup>    | 9.2    | -21.0   | 5.7    | 18.1   | -26.0   | 12.8   |
| # 401 Hexacyclopropylethane                                    | 111.5 <sup>a</sup>  | 121.5  | 86.6    | 117.3  | 128.3  | 78.6    | 126.2  |
| # 402 Tetra-tert-butyltetrahedrane                             | 6.2 <sup>a</sup>    | 45.7   | 9.3     | 39.0   | 47.2   | -4.1    | 39.8   |
| # 403 Meso-3,4-dicyclohexyl-2,5-dimethylhexane                 | -71.6 <sup>a</sup>  | -70.4  | -108.8  | -77.7  | -69.2  | -124.1  | -78.7  |
| # 404 Tetradecylcyclohexane                                    | -100.2 <sup>a</sup> | -92.7  | -122.5  | -96.0  | -96.9  | -141.2  | -101.0 |
| # 405 Eicosane                                                 | -108.9 <sup>a</sup> | -103.1 | -132.0  | -105.9 | -107.7 | -150.7  | -110.9 |
| # 406 1,8-Paracyclophane                                       | 6.9 <sup>a</sup>    | 11.0   | -20.5   | 5.6    | 11.0   | -34.4   | 3.3    |
| # 407 Hexadecylcyclopentane                                    | -99.3 <sup>a</sup>  | -93.5  | -124.7  | -96.4  | -98.1  | -144.3  | -101.3 |
| # 408 Pentadecylcyclohexane                                    | -105.1 <sup>a</sup> | -96.1  | -127.8  | -99.5  | -100.6 | -147.4  | -104.7 |
| # 410 1,1'-Diphenyl-1,1'-bicyclopentyl                         | 26.6 <sup>a</sup>   | 20.3   | -14.8   | 15.5   | 26.3   | -24.5   | 19.0   |
| # 411 DL-3,4-di-1-cyclohexen-1-yl-2,2,5,5-tetramethyl hexane   | -50.4 <sup>a</sup>  | -42.0  | -84.8   | -51.6  | -34.5  | -95.6   | -47.4  |
| # 412 Meso-3,4-di-1-cyclohexen-1-yl-2,2,5,5-tetramethyl hexane | -58.4 <sup>a</sup>  | -41.0  | -83.8   | -50.5  | -33.6  | -94.7   | -46.4  |
| # 413 n-Hexadecylcyclohexane                                   | -110.1 <sup>a</sup> | -101.8 | -134.7  | -105.5 | -106.6 | -155.4  | -111.1 |
| # 414 p-Quaterphenyl                                           | 91.4 <sup>a</sup>   | 79.4   | 53.2    | 80.7   | 83.4   | 43.9    | 81.9   |
| # 415 1,1'-Diphenyl-1,1'-bicyclohexyl                          | 10.4 <sup>a</sup>   | 7.7    | -32.5   | 1.6    | 14.5   | -43.6   | 4.6    |
| # 416 6,6'-Paracyclophane                                      | -18.5 <sup>a</sup>  | -5.2   | -40.7   | -10.0  | -6.2   | -57.9   | -13.4  |
| # 418 Tetraphenylmethane                                       | 93.9 <sup>a</sup>   | 82.9   | 49.4    | 79.9   | 90.6   | 42.5    | 83.3   |
| # 419 9,9'-Bi-9H-fluorene                                      | 95.4 <sup>a</sup>   | 89.3   | 56.7    | 86.2   | 92.9   | 45.3    | 86.8   |
| # 420 1,1,1,2-Tetraphenylethane                                | 87.3 <sup>a</sup>   | 80.6   | 44.6    | 76.3   | 87.4   | 35.0    | 78.5   |
| # 421 1,1,2,2-Tetraphenylethane                                | 85.4 <sup>a</sup>   | 80.7   | 45.7    | 76.2   | 84.5   | 33.9    | 76.0   |
| # 422 Pentacyclo hexacosane nonane                             | 78.0 <sup>a</sup>   | 74.6   | 30.7    | 62.1   | 78.0   | 15.0    | 60.3   |
| # 423 2,3-Dimethyl-2,3-bis(4-t-butylphenyl)butane              | -33.3 <sup>a</sup>  | -43.5  | -86.4   | -48.5  | -29.2  | -91.6   | -37.8  |
| # 424 11-n-butyl docosane                                      | -141.8 <sup>a</sup> | -129.1 | -168.8  | -134.0 | -134.4 | -192.8  | -140.1 |
| # 425 5-n-butyl docosane                                       | -140.4 <sup>a</sup> | -129.1 | -168.8  | -134.0 | -134.3 | -192.8  | -140.1 |
| # 426 9,9'-Dimethyl-9,9'-bifluorene                            | 94.3 <sup>a</sup>   | 75.6   | 36.4    | 70.9   | 84.8   | 27.9    | 75.9   |
| # 427 1,1-Diphenyl-1,1-bicyclooctyl                            | 16.6 <sup>a</sup>   | 27.4   | -23.8   | 18.3   | 30.4   | -42.6   | 17.0   |
| # 428 11-Decyl heneicosane                                     | -167.3 <sup>a</sup> | -153.2 | -200.3  | -158.8 | -159.6 | -229.0  | -166.4 |
| # 429 2,4,5,7-Tetramethyl-4,5-bis(4-t-butylphenyl) octane      | -60.6 <sup>a</sup>  | -63.5  | -121.4  | -73.7  | -47.6  | -130.7  | -63.4  |
| # 430 Dotriacontane                                            | -166.5 <sup>a</sup> | -157.8 | -204.9  | -162.9 | -165.7 | -235.7  | -171.8 |
| # 431 4,5-Dipropyl-4,5-bis(4-t-butylphenyl) octane             | -50.8 <sup>a</sup>  | -65.5  | -127.9  | -76.4  | -50.8  | -139.9  | -66.4  |
| # 432 5,6-Dibutyl-5,6-bis(4-t-butylphenyl) decane              | -58.6 <sup>a</sup>  | -77.5  | -147.6  | -90.1  | -63.8  | -163.1  | -81.1  |
| # 433 5,6-Dibutyl-5,6-bis(4-tert-butylphenyl)decane            | -58.6 <sup>a</sup>  | -70.2  | -142.5  | -84.4  | -70.0  | -159.3  | -76.2  |
| # 447 Hydrogen cyanide (Geo)                                   | 32.3 <sup>a</sup>   | 26.1   | 25.7    | 25.5   | 25.3   | 24.7    | 25.4   |
| # 454 Methylamine (Geo)                                        | -5.5 <sup>a</sup>   | -4.1   | -5.6    | -6.3   | -5.8   | -8.1    | -5.6   |
| # 459 Acetonitrile (Geo)                                       | 17.7 <sup>a</sup>   | 17.5   | 16.2    | 17.3   | 15.3   | 13.2    | 15.3   |
| # 460 Methyl isocyanide (Geo)                                  | 39.1 <sup>a</sup>   | 38.3   | 36.9    | 37.6   | 26.7   | 24.4    | 21.8   |
| # 462 Ethyleneimine (Azirane) (Geo)                            | 30.2 <sup>a</sup>   | 36.3   | 34.3    | 36.0   | 35.4   | 32.3    | 38.0   |
| # 467 Dimethylamine (Geo)                                      | -4.4 <sup>a</sup>   | -5.1   | -7.9    | -4.2   | -2.2   | -6.5    | -3.2   |
| # 472 Acrylonitrile (Geo)                                      | 44.1 <sup>a</sup>   | 45.6   | 43.6    | 45.3   | 43.7   | 40.5    | 43.6   |
| # 476 Trimethylamine (Geo)                                     | -5.7 <sup>a</sup>   | -8.0   | -12.4   | -4.5   | -0.1   | -6.7    | -2.9   |
| # 484 Pyrrole (Geo)                                            | 25.9 <sup>a</sup>   | 33.7   | 30.2    | 35.6   | 32.0   | 26.3    | 33.9   |

... continued on next page ...

Table S71: ... continued from previous page ...

| Species                                          | Ref.               | OM2   | OM2-D3T | ODM2  | OM3   | OM3-D3T | ODM3  |
|--------------------------------------------------|--------------------|-------|---------|-------|-------|---------|-------|
| # 493 Pyridine (Geo)                             | 34.6 <sup>a</sup>  | 30.8  | 26.3    | 33.5  | 29.4  | 22.3    | 31.8  |
| # 689 s-Triazine (Geo)                           | 54.0 <sup>a</sup>  | 59.7  | 56.1    | 62.7  | 55.6  | 49.8    | 54.6  |
| # 449 Hydrogen isocyanide                        | 43.5 <sup>a</sup>  | 42.9  | 42.5    | 37.1  | 26.8  | 26.1    | 22.0  |
| # 450 CH <sub>2</sub> -NH <sub>2</sub> , cation  | 178.0 <sup>a</sup> | 174.9 | 173.7   | 172.9 | 173.4 | 171.6   | 175.4 |
| # 451 CH <sub>2</sub> -NH <sub>2</sub> , radical | 0.0 <sup>a</sup>   | 29.3  | 28.2    | 28.0  | 25.2  | 23.3    | 27.3  |
| # 452 CH <sub>3</sub> -NH.                       | 37.0 <sup>a</sup>  | 41.9  | 40.8    | 40.0  | 39.0  | 37.1    | 36.5  |
| # 453 CH <sub>3</sub> NH, anion                  | 30.5 <sup>a</sup>  | 31.9  | 30.8    | 27.1  | 25.6  | 23.8    | 24.5  |
| # 464 Dimethyl nitrogen, anion                   | 24.7 <sup>a</sup>  | 17.4  | 15.1    | 15.7  | 17.1  | 13.4    | 14.6  |
| # 466 Ethylamine                                 | -11.4 <sup>a</sup> | -8.9  | -11.7   | -10.9 | -12.1 | -16.5   | -11.9 |
| # 473 Ethyl cyanide                              | 12.1 <sup>a</sup>  | 12.3  | 9.6     | 12.1  | 10.2  | 6.0     | 10.5  |
| # 474 Cyclopropylamine                           | 18.4 <sup>a</sup>  | 22.1  | 18.6    | 19.8  | 19.5  | 14.1    | 20.8  |
| # 475 Isopropylamine                             | -20.0 <sup>a</sup> | -15.0 | -19.5   | -18.5 | -18.3 | -25.1   | -18.6 |
| # 477 n-Propylamine                              | -16.8 <sup>a</sup> | -13.5 | -17.8   | -15.6 | -16.9 | -23.5   | -16.8 |
| # 481 (E)-2-Butenenitrile                        | 33.6 <sup>a</sup>  | 35.7  | 32.5    | 35.4  | 33.6  | 28.5    | 33.6  |
| # 482 (Z)-2-Butenenitrile                        | 32.0 <sup>a</sup>  | 36.4  | 33.0    | 36.2  | 34.2  | 28.8    | 34.3  |
| # 483 3-Butenenitrile                            | 37.7 <sup>a</sup>  | 39.0  | 35.6    | 38.5  | 37.0  | 31.8    | 36.5  |
| # 486 Butanenitrile                              | 7.4 <sup>a</sup>   | 7.5   | 3.3     | 7.1   | 5.3   | -1.1    | 5.4   |
| # 487 Isobutane nitrile                          | 5.6 <sup>a</sup>   | 5.1   | 0.8     | 4.6   | 3.5   | -3.1    | 3.6   |
| # 488 Pyrrolidine                                | -0.8 <sup>a</sup>  | 0.0   | -5.3    | 0.6   | 0.4   | -7.8    | -0.0  |
| # 489 2-Butylamine                               | -25.4 <sup>a</sup> | -19.4 | -25.5   | -23.1 | -22.7 | -32.0   | -23.3 |
| # 490 2-Methyl-1-propylamine                     | -23.6 <sup>a</sup> | -19.5 | -25.7   | -23.4 | -21.7 | -31.0   | -22.6 |
| # 491 N-Butylamine                               | -22.7 <sup>a</sup> | -18.0 | -23.7   | -21.6 | -20.9 | -29.7   | -21.5 |
| # 492 t-Butylamine                               | -28.9 <sup>a</sup> | -22.3 | -28.7   | -27.4 | -24.6 | -34.3   | -25.6 |
| # 495 N-Methyl pyrrole                           | 24.6 <sup>a</sup>  | 31.1  | 26.0    | 35.8  | 33.5  | 25.6    | 33.6  |
| # 496 1,2,3,6-Tetrahydropyridine                 | 7.1 <sup>a</sup>   | 20.8  | 14.4    | 22.0  | 20.6  | 10.8    | 19.8  |
| # 497 2-Cyanobutane                              | 0.6 <sup>a</sup>   | 0.6   | -5.4    | -0.0  | -0.8  | -9.9    | -1.0  |
| # 498 Butyl cyanide                              | 2.7 <sup>a</sup>   | 2.9   | -2.8    | 2.3   | 0.5   | -8.1    | 0.4   |
| # 499 t-Butylnitrile                             | -0.8 <sup>a</sup>  | -3.7  | -10.0   | -4.6  | -3.9  | -13.3   | -4.3  |
| # 500 Cyclopentylamine                           | -13.1 <sup>a</sup> | -9.9  | -17.0   | -14.6 | -13.8 | -24.6   | -14.2 |
| # 501 Piperidine                                 | -11.3 <sup>a</sup> | -6.7  | -14.1   | -5.7  | -7.2  | -18.5   | -8.2  |
| # 502 N-Methyl-n-butylamine                      | -25.9 <sup>a</sup> | -19.2 | -26.4   | -19.7 | -17.7 | -28.6   | -19.5 |
| # 503 1-Cyclopentenecarbonitrile                 | 37.4 <sup>a</sup>  | 37.3  | 31.3    | 37.1  | 34.7  | 25.6    | 35.3  |
| # 504 2-Cyclopentenecarbonitrile                 | 33.9 <sup>a</sup>  | 37.4  | 31.3    | 36.8  | 35.0  | 25.6    | 34.8  |
| # 505 2-Methyl pyridine                          | 23.6 <sup>a</sup>  | 22.8  | 16.8    | 23.5  | 20.9  | 11.5    | 22.5  |
| # 506 3-Methyl pyridine                          | 24.8 <sup>a</sup>  | 21.2  | 15.2    | 23.4  | 20.3  | 10.8    | 22.1  |
| # 507 4-Methyl pyridine                          | 24.8 <sup>a</sup>  | 21.2  | 15.1    | 23.2  | 20.4  | 10.9    | 21.9  |
| # 508 Aniline                                    | 20.8 <sup>a</sup>  | 25.2  | 19.0    | 22.0  | 22.3  | 12.7    | 22.0  |
| # 509 2,5-Dimethyl-1H-pyrrole                    | 9.5 <sup>a</sup>   | 18.3  | 11.8    | 18.1  | 14.8  | 4.7     | 16.5  |
| # 510 Cyclopentanecarbonitrile                   | 11.7 <sup>a</sup>  | 9.8   | 3.3     | 9.2   | 8.0   | -2.7    | 7.7   |
| # 511 2-Methylpiperidine                         | -20.2 <sup>a</sup> | -13.3 | -22.4   | -16.5 | -13.3 | -27.0   | -16.1 |
| # 512 Cyclohexamethylenimine                     | -10.8 <sup>a</sup> | -5.0  | -14.5   | -4.8  | -7.0  | -21.3   | -8.6  |
| # 513 Cyclohexanamine                            | -25.1 <sup>a</sup> | -17.3 | -26.5   | -22.8 | -21.2 | -35.1   | -22.9 |
| # 514 Di-n-propylamine                           | -27.8 <sup>a</sup> | -24.3 | -32.9   | -25.8 | -23.6 | -36.6   | -25.8 |
| # 515 Diisopropylamine                           | -32.6 <sup>a</sup> | -25.1 | -34.7   | -27.3 | -25.6 | -39.7   | -27.8 |
| # 516 Triethylamine                              | -22.1 <sup>a</sup> | -17.3 | -27.2   | -17.8 | -14.9 | -29.4   | -18.9 |
| # 518 Phenyl cyanide                             | 51.5 <sup>a</sup>  | 49.7  | 43.7    | 50.1  | 48.0  | 38.6    | 48.3  |
| # 519 1-Cyclohexenecarbonitrile                  | 24.3 <sup>a</sup>  | 29.5  | 21.5    | 29.0  | 26.8  | 14.6    | 26.8  |
| # 520 2,6-Dimethylpyridine                       | 13.4 <sup>a</sup>  | 14.5  | 6.9     | 14.3  | 12.5  | 0.8     | 13.2  |
| # 521 2-Cyclohexenecarbonitrile                  | 26.2 <sup>a</sup>  | 31.1  | 22.9    | 30.5  | 28.6  | 16.1    | 28.0  |
| # 522 Benzylamine                                | 21.0 <sup>a</sup>  | 21.7  | 13.8    | 20.1  | 18.7  | 6.7     | 18.6  |
| # 523 m-Toluidine                                | 14.6 <sup>a</sup>  | 15.8  | 8.0     | 12.5  | 13.3  | 1.4     | 13.0  |
| # 524 N-Methylaniline                            | 20.1 <sup>a</sup>  | 25.5  | 17.7    | 26.1  | 26.5  | 14.6    | 25.5  |
| # 525 o-Toluidine                                | 12.7 <sup>a</sup>  | 16.6  | 8.6     | 13.3  | 14.3  | 2.1     | 14.1  |
| # 526 p-Toluidine                                | 10.0 <sup>a</sup>  | 16.3  | 8.6     | 13.0  | 13.8  | 1.9     | 13.4  |
| # 527 Cyanocyclohexane                           | -0.9 <sup>a</sup>  | 2.5   | -6.7    | 1.3   | 0.1   | -13.8   | -0.8  |
| # 528 Cyclohexanecarbonitrile                    | -0.9 <sup>a</sup>  | 2.5   | -6.7    | 1.3   | 0.1   | -13.8   | -0.8  |
| # 529 Hexahydro-1H-pyrrolizine                   | -0.9 <sup>a</sup>  | -2.6  | -12.9   | -0.3  | 1.5   | -13.8   | -0.6  |
| # 530 n-Heptanenitrile                           | -7.4 <sup>a</sup>  | -6.2  | -14.9   | -7.2  | -9.1  | -22.3   | -9.7  |
| # 531 Isopropylbutylamine                        | -39.4 <sup>a</sup> | -29.5 | -40.1   | -31.4 | -29.6 | -45.3   | -31.9 |
| # 532 1-Norbornylcyanide                         | 18.0 <sup>a</sup>  | 15.6  | 5.1     | 14.0  | 15.5  | -0.3    | 14.4  |
| # 533 1-Norbornylisocyanide                      | 39.6 <sup>a</sup>  | 36.1  | 25.5    | 32.0  | 24.8  | 8.8     | 18.4  |
| # 534 5-Ethyl-2-methyl-pyridine                  | 8.3 <sup>a</sup>   | 8.5   | -0.8    | 9.6   | 7.3   | -6.9    | 9.2   |
| # 535 N,N-Dimethyl aniline                       | 24.0 <sup>a</sup>  | 24.9  | 15.2    | 27.6  | 30.5  | 15.8    | 27.6  |
| # 536 N-Ethyl aniline                            | 13.4 <sup>a</sup>  | 20.7  | 11.1    | 21.1  | 20.4  | 6.0     | 19.2  |
| # 537 3-Azabicyclo[3.2.2]nonane                  | -10.4 <sup>a</sup> | -2.3  | -15.5   | -1.8  | -3.7  | -23.4   | -5.1  |

... continued on next page ...

Table S71: ... continued from previous page ...

| Species                                                 | Ref.                | OM2    | OM2-D3T | ODM2   | OM3    | OM3-D3T | ODM3   |
|---------------------------------------------------------|---------------------|--------|---------|--------|--------|---------|--------|
| # 538 n-Heptyl cyanide                                  | -12.1 <sup>a</sup>  | -10.8  | -21.0   | -11.9  | -14.0  | -29.4   | -14.8  |
| # 539 N-(2-Methylpropylidene)-butylamine                | -21.8 <sup>a</sup>  | -16.7  | -29.8   | -21.4  | -18.3  | -35.1   | -20.7  |
| # 540 2-Methyl-N-(2-methylpropyl)-1-propanamine         | -43.2 <sup>a</sup>  | -36.5  | -49.1   | -39.1  | -34.8  | -53.5   | -38.2  |
| # 541 Di-sec-butylamine                                 | -43.9 <sup>a</sup>  | -34.0  | -47.1   | -36.6  | -34.4  | -53.5   | -37.2  |
| # 542 Dibutylamine                                      | -40.9 <sup>a</sup>  | -33.4  | -45.0   | -35.3  | -33.2  | -50.7   | -35.9  |
| # 543 N-(2-Methylpropyl)-1-butanamine                   | -41.8 <sup>a</sup>  | -34.9  | -47.0   | -37.2  | -34.1  | -52.2   | -37.1  |
| # 544 n-Octylamine                                      | -41.5 <sup>a</sup>  | -36.2  | -48.0   | -40.5  | -40.2  | -58.0   | -41.7  |
| # 545 Isoquinoline                                      | 48.9 <sup>a</sup>   | 46.9   | 37.9    | 49.8   | 46.7   | 32.7    | 48.4   |
| # 546 Quinoline                                         | 47.9 <sup>a</sup>   | 48.7   | 39.7    | 50.4   | 48.0   | 34.1    | 49.7   |
| # 547 2,6-Dimethylbenzotrile                            | 34.9 <sup>a</sup>   | 30.1   | 20.4    | 29.9   | 29.8   | 15.0    | 29.4   |
| # 548 (1a,2a,4a)-Bicyclo[2.2.2]oct-5-ene-2-carbonitrile | 36.2 <sup>a</sup>   | 32.6   | 20.8    | 31.7   | 31.1   | 13.3    | 29.7   |
| # 549 (1a,2b,4a)-Bicyclo[2.2.2]oct-5-ene-2-carbonitrile | 36.6 <sup>a</sup>   | 32.4   | 20.5    | 31.5   | 31.2   | 13.3    | 29.7   |
| # 550 1,2,3,4-Tetrahydroquinoline                       | 19.6 <sup>a</sup>   | 22.4   | 11.5    | 21.6   | 22.5   | 5.9     | 20.6   |
| # 551 5,6,7,8-Tetrahydroquinoline                       | 17.0 <sup>a</sup>   | 15.7   | 4.7     | 16.6   | 13.6   | -3.0    | 15.2   |
| # 552 N,N-Dimethyl m-toluidine                          | 17.4 <sup>a</sup>   | 15.6   | 4.2     | 17.6   | 21.6   | 4.4     | 18.5   |
| # 553 N,N-Dimethyl p-toluidine                          | 16.5 <sup>a</sup>   | 16.0   | 4.7     | 18.8   | 22.1   | 5.0     | 19.0   |
| # 554 N-Ethyl m-toluidine                               | 7.3 <sup>a</sup>    | 11.4   | 0.1     | 11.6   | 11.4   | -5.4    | 10.1   |
| # 555 cis-3,7a-H-cis-5,8-H-3,5-Dimethylpyrrolizidine    | -15.9 <sup>a</sup>  | -16.3  | -30.4   | -19.1  | -12.8  | -33.5   | -17.7  |
| # 556 Decahydro trans-quinoline                         | -27.0 <sup>a</sup>  | -18.1  | -32.7   | -19.9  | -18.9  | -40.5   | -22.4  |
| # 557 2,2,6,6-Tetramethyl piperidine                    | -38.2 <sup>a</sup>  | -30.1  | -46.0   | -35.3  | -30.7  | -52.3   | -32.7  |
| # 558 2-Methyl-quinoline                                | 38.0 <sup>a</sup>   | 40.5   | 30.0    | 40.1   | 39.4   | 23.2    | 40.8   |
| # 559 4-Methyl-quinoline                                | 38.7 <sup>a</sup>   | 39.5   | 28.7    | 41.2   | 39.7   | 23.1    | 41.3   |
| # 560 6-Methyl-quinoline                                | 38.5 <sup>a</sup>   | 39.1   | 28.5    | 40.7   | 38.8   | 22.6    | 40.5   |
| # 561 8-Methyl-quinoline                                | 40.1 <sup>a</sup>   | 39.3   | 28.6    | 40.8   | 39.1   | 22.6    | 40.7   |
| # 562 2,4,6-Trimethyl-benzotrile                        | 25.4 <sup>a</sup>   | 20.6   | 9.2     | 19.5   | 20.7   | 3.1     | 20.0   |
| # 563 2,4,6-Trimethylphenyl isocyanide                  | 56.6 <sup>a</sup>   | 42.1   | 30.6    | 38.6   | 31.5   | 14.1    | 25.9   |
| # 564 N,N-Diethyl aniline                               | 14.8 <sup>a</sup>   | 16.6   | 2.7     | 16.9   | 19.8   | -0.7    | 15.8   |
| # 565 n-Nonyl cyanide                                   | -21.9 <sup>a</sup>  | -19.9  | -33.2   | -21.4  | -23.6  | -43.5   | -24.9  |
| # 566 2,6-Dimethyl quinoline                            | 28.9 <sup>a</sup>   | 31.0   | 18.8    | 30.4   | 30.3   | 11.8    | 31.6   |
| # 567 2,7-Dimethyl quinoline                            | 29.1 <sup>a</sup>   | 30.9   | 18.8    | 30.4   | 30.4   | 11.8    | 31.6   |
| # 568 1-Adamantyl cyanide                               | -1.8 <sup>a</sup>   | -3.7   | -20.5   | -6.0   | -3.3   | -28.4   | -6.1   |
| # 569 1-Adamantyl isocyanide                            | 17.5 <sup>a</sup>   | 16.7   | -0.2    | 12.0   | 6.1    | -19.2   | -1.9   |
| # 570 2-Methyl-6-t-butylaniline                         | -10.7 <sup>a</sup>  | -5.0   | -21.4   | -9.3   | -3.5   | -27.8   | -5.5   |
| # 571 n-Undecanenitrile                                 | -27.1 <sup>a</sup>  | -24.5  | -39.3   | -26.2  | -28.5  | -50.6   | -30.0  |
| # 572 Carbazole                                         | 50.1 <sup>a</sup>   | 58.7   | 46.3    | 58.0   | 57.6   | 38.6    | 57.1   |
| # 573 2-Biphenylamine                                   | 44.1 <sup>a</sup>   | 45.1   | 31.4    | 41.9   | 44.1   | 23.4    | 43.1   |
| # 574 Biphenylamine                                     | 48.2 <sup>a</sup>   | 56.0   | 42.8    | 55.0   | 55.7   | 35.6    | 53.9   |
| # 575 2-n-Butyl-2-methylhexanenitrile                   | -31.8 <sup>a</sup>  | -30.7  | -49.8   | -34.1  | -31.5  | -59.4   | -35.0  |
| # 576 6,7-Benzoquinoline                                | 58.2 <sup>a</sup>   | 60.3   | 46.5    | 62.2   | 61.0   | 39.9    | 61.9   |
| # 577 a-Benzoquinoline                                  | 59.8 <sup>a</sup>   | 59.3   | 45.6    | 61.0   | 59.8   | 38.8    | 61.3   |
| # 578 Acridine                                          | 65.5 <sup>a</sup>   | 71.7   | 58.2    | 72.0   | 71.5   | 50.8    | 72.7   |
| # 579 Benzo[f]quinoline                                 | 55.9 <sup>a</sup>   | 60.6   | 46.8    | 62.4   | 61.2   | 40.0    | 62.7   |
| # 580 Phenanthridine                                    | 57.5 <sup>a</sup>   | 60.3   | 46.5    | 62.2   | 61.0   | 39.9    | 61.9   |
| # 581 N-Methylcarbazole                                 | 47.6 <sup>a</sup>   | 55.8   | 41.4    | 59.1   | 59.3   | 37.5    | 57.8   |
| # 582 1,2,3,4-Tetrahydro-N-methylcarbazole              | 22.3 <sup>a</sup>   | 31.9   | 15.5    | 34.8   | 34.0   | 9.3     | 32.7   |
| # 583 9-Ethyl-9H-carbazole                              | 40.6 <sup>a</sup>   | 50.7   | 34.2    | 53.1   | 53.3   | 28.6    | 51.1   |
| # 584 Tetradecanenitrile                                | -41.8 <sup>a</sup>  | -38.2  | -57.5   | -40.4  | -43.0  | -71.8   | -45.2  |
| # 585 Dioctylamine                                      | -76.5 <sup>a</sup>  | -69.9  | -93.6   | -73.3  | -71.9  | -107.3  | -76.4  |
| # 586 Triphenylamine                                    | 78.1 <sup>a</sup>   | 83.6   | 61.6    | 83.8   | 88.3   | 55.9    | 83.4   |
| # 587 Trioctylamine                                     | -114.0 <sup>a</sup> | -101.1 | -138.5  | -104.8 | -102.6 | -158.1  | -111.5 |
| # 593 Diazomethane                                      | 71.0 <sup>a</sup>   | 60.5   | 59.4    | 64.2   | 57.2   | 55.5    | 63.1   |
| # 594 N=N-CH2-                                          | 79.0 <sup>a</sup>   | 87.4   | 86.4    | 89.3   | 80.2   | 78.5    | 91.8   |
| # 595 Methylhydrazine                                   | 22.6 <sup>a</sup>   | 17.0   | 14.6    | 18.9   | 18.6   | 14.9    | 18.6   |
| # 599 1,1-Dimethylhydrazine                             | 20.0 <sup>a</sup>   | 14.8   | 10.8    | 17.8   | 21.4   | 15.4    | 22.2   |
| # 600 1,2-Dimethylhydrazine                             | 22.0 <sup>a</sup>   | 17.1   | 13.2    | 26.3   | 28.4   | 22.8    | 24.4   |
| # 601 Ethylenediamine                                   | -4.1 <sup>a</sup>   | 4.1    | 0.0     | -0.6   | -2.7   | -8.9    | -3.0   |
| # 602 1H-Pyrazole                                       | 42.9 <sup>a</sup>   | 47.8   | 44.6    | 52.0   | 49.3   | 44.3    | 52.1   |
| # 603 Imidazole                                         | 31.8 <sup>a</sup>   | 40.0   | 36.9    | 42.4   | 39.7   | 34.6    | 42.7   |
| # 604 1,2-Propanediamine                                | -12.8 <sup>a</sup>  | -4.1   | -9.8    | -10.0  | -10.5  | -19.2   | -11.4  |
| # 606 Fumaronitrile                                     | 81.3 <sup>a</sup>   | 79.7   | 76.9    | 79.7   | 75.2   | 70.8    | 75.8   |
| # 607 1,3-Diazine                                       | 47.0 <sup>a</sup>   | 44.5   | 40.4    | 48.0   | 41.9   | 35.4    | 43.8   |
| # 608 Pyrazine                                          | 46.9 <sup>a</sup>   | 44.9   | 40.9    | 50.0   | 42.0   | 35.5    | 47.8   |
| # 609 Pyridazine                                        | 66.5 <sup>a</sup>   | 48.4   | 44.3    | 55.3   | 51.1   | 44.6    | 56.0   |
| # 610 Succinonitrile                                    | 50.1 <sup>a</sup>   | 47.7   | 44.0    | 47.3   | 43.4   | 37.7    | 43.4   |
| # 611 2-Methyl-1H-imidazole                             | 21.5 <sup>a</sup>   | 33.5   | 28.9    | 33.9   | 31.4   | 24.3    | 34.3   |

... continued on next page ...

Table S71: ... continued from previous page ...

| Species                                                | Ref.               | OM2   | OM2-D3T | ODM2  | OM3  | OM3-D3T | ODM3  |
|--------------------------------------------------------|--------------------|-------|---------|-------|------|---------|-------|
| # 612 (Dimethylamino) acetonitrile                     | 27.3 <sup>a</sup>  | 27.5  | 22.0    | 29.6  | 29.6 | 21.3    | 28.6  |
| # 613 1,4,5,6-Tetrahydropyrimidine                     | 13.2 <sup>a</sup>  | 26.3  | 20.4    | 26.2  | 26.1 | 17.2    | 20.8  |
| # 614 Piperazine                                       | 6.0 <sup>a</sup>   | 13.5  | 6.7     | 13.2  | 15.3 | 4.9     | 12.3  |
| # 615 2-Aminopyridine                                  | 28.2 <sup>a</sup>  | 36.6  | 31.0    | 32.8  | 32.6 | 23.9    | 32.5  |
| # 616 3-Aminopyridine                                  | 34.5 <sup>a</sup>  | 36.5  | 30.8    | 35.6  | 32.8 | 23.9    | 35.2  |
| # 617 4-Aminopyridine                                  | 31.0 <sup>a</sup>  | 36.0  | 30.4    | 34.3  | 32.6 | 23.8    | 33.5  |
| # 618 Dimethyl propanedinitrile                        | 47.1 <sup>a</sup>  | 38.0  | 32.4    | 37.7  | 35.5 | 27.0    | 35.9  |
| # 619 2-Ethyl-1H-imidazole                             | 16.3 <sup>a</sup>  | 28.4  | 22.3    | 28.8  | 26.5 | 17.1    | 29.4  |
| # 620 Diethylcyanamide                                 | 15.2 <sup>a</sup>  | 23.7  | 16.5    | 25.9  | 27.6 | 16.9    | 23.5  |
| # 621 Butylmethyldiazene                               | 18.9 <sup>a</sup>  | 13.1  | 5.9     | 12.0  | 14.1 | 3.2     | 15.9  |
| # 622 Butylmethyldiazine                               | 18.9 <sup>a</sup>  | 13.1  | 5.9     | 12.0  | 14.1 | 3.2     | 15.9  |
| # 623 N,N-Dimethyl-1,3-propanediamine                  | -8.3 <sup>a</sup>  | -4.1  | -12.7   | -5.5  | 0.2  | -12.7   | -4.3  |
| # 624 2-Cyanopyridine                                  | 67.1 <sup>a</sup>  | 67.0  | 61.5    | 68.2  | 62.3 | 53.7    | 65.4  |
| # 625 3-Cyanopyridine                                  | 66.4 <sup>a</sup>  | 63.2  | 57.7    | 65.6  | 60.3 | 51.5    | 62.7  |
| # 626 4-Cyanopyridine                                  | 67.8 <sup>a</sup>  | 63.6  | 58.1    | 66.1  | 60.7 | 52.0    | 63.2  |
| # 627 2,3-Dimethyl pyrazine                            | 30.1 <sup>a</sup>  | 28.6  | 21.2    | 30.9  | 24.8 | 13.6    | 30.0  |
| # 628 Hexanedinitrile                                  | 35.7 <sup>a</sup>  | 36.9  | 30.2    | 35.8  | 32.3 | 22.1    | 31.7  |
| # 629 Phenylhydrazine                                  | 48.5 <sup>a</sup>  | 47.9  | 40.5    | 49.5  | 48.9 | 37.5    | 49.0  |
| # 630 3(Dimethylamino) propanenitrile                  | 21.6 <sup>a</sup>  | 16.9  | 8.3     | 18.5  | 21.6 | 8.8     | 17.6  |
| # 631 Tetramethyldiazetene                             | 35.9 <sup>a</sup>  | 38.6  | 29.0    | 41.0  | 47.3 | 32.8    | 49.5  |
| # 632 Triethylenediamine                               | 11.5 <sup>a</sup>  | 28.3  | 18.1    | 36.0  | 38.9 | 23.4    | 35.4  |
| # 633 1,2-Diisopropyldiazene                           | 8.6 <sup>a</sup>   | 4.7   | -4.8    | 3.6   | 6.2  | -8.0    | 8.4   |
| # 634 Dipropyldiazene                                  | 12.4 <sup>a</sup>  | 8.0   | -0.6    | 6.0   | 8.7  | -4.2    | 10.2  |
| # 635 1H-Benzimidazole                                 | 43.4 <sup>a</sup>  | 57.5  | 50.2    | 57.6  | 56.6 | 45.1    | 57.2  |
| # 636 1H-Indazole                                      | 58.1 <sup>a</sup>  | 64.4  | 57.0    | 68.0  | 65.5 | 54.0    | 68.0  |
| # 637 1-Methyl-1-phenylhydrazine                       | 50.4 <sup>a</sup>  | 47.2  | 38.0    | 49.7  | 52.8 | 39.0    | 51.4  |
| # 638 t-Butylmalononitrile                             | 30.3 <sup>a</sup>  | 27.4  | 17.4    | 25.6  | 26.0 | 11.3    | 24.5  |
| # 639 Trimethyl pyrazine                               | 17.8 <sup>a</sup>  | 20.4  | 11.5    | 21.4  | 16.2 | 2.7     | 21.2  |
| # 640 1-Piperidineacetonitrile                         | 19.8 <sup>a</sup>  | 25.3  | 15.0    | 24.5  | 24.9 | 8.6     | 21.1  |
| # 641 3,3,5,5-Tetramethyl-1-pyrazoline                 | 9.4 <sup>a</sup>   | -5.8  | -17.4   | -4.3  | 1.0  | -16.2   | 1.7   |
| # 642 m-Dicyanobenzene                                 | 86.7 <sup>a</sup>  | 82.6  | 75.5    | 82.7  | 79.2 | 68.2    | 79.8  |
| # 643 o-Dicyanobenzene                                 | 87.8 <sup>a</sup>  | 83.8  | 76.5    | 84.1  | 80.2 | 69.0    | 81.1  |
| # 644 p-Dicyanobenzene                                 | 85.6 <sup>a</sup>  | 82.3  | 75.1    | 82.3  | 78.9 | 67.8    | 79.5  |
| # 645 Phthalazine                                      | 78.8 <sup>a</sup>  | 65.0  | 56.5    | 71.7  | 68.2 | 54.9    | 71.7  |
| # 646 Quinoxaline                                      | 58.1 <sup>a</sup>  | 62.3  | 53.9    | 64.8  | 60.4 | 47.3    | 61.3  |
| # 647 Quinoxaline                                      | 57.4 <sup>a</sup>  | 64.7  | 56.3    | 67.8  | 61.9 | 48.8    | 66.8  |
| # 648 n-Pentylmalonodinitrile                          | 32.5 <sup>a</sup>  | 29.1  | 19.0    | 28.1  | 24.7 | 9.6     | 24.3  |
| # 649 Tetramethylbutanedinitrile                       | 24.0 <sup>a</sup>  | 15.2  | 2.9     | 12.7  | 16.3 | -1.8    | 14.1  |
| # 650 Tetramethylpyrazine                              | 13.1 <sup>a</sup>  | 12.7  | 2.0     | 12.2  | 8.1  | -8.0    | 12.6  |
| # 651 1,4-Dimethyl-2,3-diaza-bicyclo[2.2.2]oct-2-ene   | 22.1 <sup>a</sup>  | 7.0   | -6.2    | 9.0   | 13.6 | -6.2    | 15.3  |
| # 652 3,4,5,6-Tetrahydro-3,3,6,6-tetramethylpyridazine | 10.0 <sup>a</sup>  | -3.6  | -17.5   | -2.3  | 3.4  | -17.1   | 1.3   |
| # 653 Di-n-butylidiazene                               | 2.2 <sup>a</sup>   | -1.1  | -12.8   | -3.4  | -0.9 | -18.2   | 0.2   |
| # 654 Di-tert-butylidiazene                            | -8.7 <sup>a</sup>  | -10.7 | -24.3   | -14.9 | -7.2 | -27.2   | -7.7  |
| # 655 1,2-Dibutylhydrazine                             | -14.2 <sup>a</sup> | -10.3 | -23.3   | -8.7  | -7.5 | -25.2   | -5.5  |
| # 656 3-Quinolinamine                                  | 49.8 <sup>a</sup>  | 54.6  | 44.4    | 52.5  | 51.4 | 35.8    | 52.9  |
| # 657 5-Quinolinamine                                  | 50.3 <sup>a</sup>  | 55.5  | 45.2    | 53.1  | 52.3 | 36.4    | 53.6  |
| # 658 6-Quinolinamine                                  | 49.3 <sup>a</sup>  | 54.5  | 44.4    | 52.2  | 51.2 | 35.6    | 52.6  |
| # 659 8-Quinolinamine                                  | 44.8 <sup>a</sup>  | 52.8  | 42.5    | 50.4  | 49.2 | 33.4    | 50.8  |
| # 660 2-(Diethylamino)-pentanenitrile                  | -1.1 <sup>a</sup>  | 4.4   | -10.2   | 3.4   | 3.5  | -18.6   | -1.3  |
| # 661 2,2-Bipyridyl                                    | 69.1 <sup>a</sup>  | 65.1  | 54.4    | 67.2  | 62.4 | 45.9    | 66.1  |
| # 662 2,4-Bipyridyl                                    | 67.9 <sup>a</sup>  | 65.3  | 54.5    | 68.9  | 63.4 | 46.7    | 67.2  |
| # 663 4,4'-Bipyridine                                  | 70.1 <sup>a</sup>  | 63.6  | 52.7    | 68.5  | 62.7 | 45.9    | 66.4  |
| # 664 2,3-Dimethyl quinoxaline                         | 41.3 <sup>a</sup>  | 48.2  | 36.4    | 48.3  | 44.8 | 26.8    | 48.6  |
| # 665 alpha N,N-dimethylamino phenylacetonitrile       | 52.7 <sup>a</sup>  | 49.6  | 36.6    | 51.7  | 53.2 | 34.4    | 50.1  |
| # 666 Ethyl(1,1-dimethylpropyl)malonodinitrile         | 14.6 <sup>a</sup>  | 10.5  | -6.0    | 7.4   | 12.0 | -12.1   | 9.1   |
| # 667 Meso-2,3-diethyl-2,3-dimethylsuccinodinitrile    | 15.3 <sup>a</sup>  | 8.4   | -8.1    | 5.2   | 10.0 | -14.1   | 7.1   |
| # 668 Methyl(1,1,2-trimethylpropyl)malonodinitrile     | 19.0 <sup>a</sup>  | 11.4  | -5.8    | 7.9   | 13.7 | -11.3   | 10.3  |
| # 669 Phenazine                                        | 80.9 <sup>a</sup>  | 90.1  | 77.3    | 90.9  | 87.1 | 67.4    | 91.7  |
| # 670 Phenazone                                        | 89.9 <sup>a</sup>  | 77.4  | 64.2    | 83.3  | 83.3 | 63.1    | 86.5  |
| # 671 cis-Azobenzene                                   | 107.7 <sup>a</sup> | 86.4  | 72.2    | 91.0  | 91.8 | 70.6    | 91.5  |
| # 672 Diphenyl diazene                                 | 96.9 <sup>a</sup>  | 91.0  | 78.3    | 90.6  | 91.7 | 72.3    | 94.6  |
| # 673 4,4'-Dimethyl-2,2'-bipyridine                    | 50.0 <sup>a</sup>  | 46.1  | 32.1    | 46.6  | 44.5 | 23.2    | 46.4  |
| # 674 1,(1-Piperidinyl) cyclohexanecarbonitrile        | 0.8 <sup>a</sup>   | 8.2   | -12.0   | 5.5   | 10.4 | -19.2   | 4.4   |
| # 677 a-Phenyl-1-piperidineacetonitrile                | 45.4 <sup>a</sup>  | 47.2  | 28.7    | 45.9  | 49.9 | 22.8    | 44.2  |
| # 680 2,2'-Biquinoline                                 | 101.8 <sup>a</sup> | 101.2 | 81.3    | 100.9 | 99.8 | 69.6    | 102.0 |

... continued on next page ...

Table S71: ... continued from previous page ...

| Species                              | Ref.                | OM2    | OM2-D3T | ODM2   | OM3    | OM3-D3T | ODM3   |
|--------------------------------------|---------------------|--------|---------|--------|--------|---------|--------|
| # 681 Tetraisobutylsuccinonitrile    | -26.7 <sup>a</sup>  | -33.3  | -72.8   | -44.5  | -28.9  | -84.8   | -40.9  |
| # 690 Ethylenetricarbonitrile        | 124.4 <sup>a</sup>  | 119.1  | 115.1   | 120.1  | 111.4  | 105.4   | 113.5  |
| # 691 1,1,1-Ethanetricarbonitrile    | 101.0 <sup>a</sup>  | 85.6   | 80.6    | 86.5   | 80.1   | 72.5    | 82.0   |
| # 693 1,3,5-Tricyanobenzene          | 121.8 <sup>a</sup>  | 117.3  | 109.0   | 117.4  | 111.9  | 99.2    | 113.0  |
| # 694 1,1,1-Tricyano-2-phenyl ethane | 129.2 <sup>a</sup>  | 111.3  | 98.5    | 110.9  | 106.4  | 87.3    | 106.1  |
| # 695 2,2',6',2'-Terpyridine         | 94.3 <sup>a</sup>   | 99.9   | 82.7    | 101.1  | 95.8   | 69.7    | 100.6  |
| # 698 1-H Tetrazole                  | 76.6 <sup>a</sup>   | 70.7   | 68.3    | 75.2   | 73.5   | 69.6    | 74.0   |
| # 699 2-H-Tetrazole                  | 79.9 <sup>a</sup>   | 72.0   | 69.6    | 77.3   | 74.1   | 70.3    | 77.2   |
| # 701 1,3,5,7-Tetraazaadamantane     | 47.6 <sup>a</sup>   | 63.9   | 50.9    | 72.3   | 84.4   | 64.8    | 70.1   |
| # 705 Melamine                       | 12.4 <sup>a</sup>   | 68.5   | 61.8    | 45.9   | 60.1   | 49.7    | 46.4   |
| # 729 Formaldehyde (Geo)             | -26.0 <sup>a</sup>  | -30.3  | -30.9   | -30.0  | -31.9  | -32.8   | -32.3  |
| # 735 Methanol (Geo)                 | -48.1 <sup>a</sup>  | -49.3  | -50.3   | -50.1  | -49.8  | -51.4   | -49.7  |
| # 741 Ketene (Geo)                   | -11.4 <sup>a</sup>  | -5.1   | -6.1    | -6.5   | -11.0  | -12.6   | -10.9  |
| # 744 Acetaldehyde (Geo)             | -39.7 <sup>a</sup>  | -44.2  | -45.8   | -44.1  | -46.5  | -49.1   | -46.7  |
| # 747 Dimethyl ether (Geo)           | -44.0 <sup>a</sup>  | -45.6  | -47.7   | -45.9  | -42.8  | -46.2   | -44.3  |
| # 754 Acetone (Geo)                  | -52.0 <sup>a</sup>  | -57.6  | -60.5   | -57.3  | -59.4  | -64.0   | -58.9  |
| # 762 Furan (Geo)                    | -8.3 <sup>a</sup>   | -2.9   | -5.9    | -3.4   | -2.7   | -7.4    | -2.2   |
| # 1053 Formic acid (Geo)             | -90.5 <sup>a</sup>  | -86.9  | -87.8   | -88.0  | -88.2  | -89.7   | -89.6  |
| # 1054 trans Glyoxal (Geo)           | -50.7 <sup>a</sup>  | -59.1  | -60.6   | -58.5  | -61.8  | -64.2   | -62.6  |
| # 1059 Methyl formate (Geo)          | -83.6 <sup>a</sup>  | -81.4  | -83.5   | -82.1  | -79.4  | -82.6   | -82.1  |
| # 1096 p-Benzoquinone (Geo)          | -29.3 <sup>a</sup>  | -32.5  | -37.9   | -31.6  | -32.9  | -41.3   | -32.0  |
| # 1376 Formic acid, dimer (Geo)      | -194.9 <sup>a</sup> | -188.3 | -191.4  | -191.5 | -193.2 | -198.0  | -197.8 |
| # 727 HCO, cation                    | 199.0 <sup>a</sup>  | 194.8  | 194.5   | 190.8  | 192.6  | 192.0   | 190.3  |
| # 728 HCO                            | 10.4 <sup>a</sup>   | 0.1    | -0.3    | -0.2   | -4.4   | -4.9    | -3.1   |
| # 731 CH2OH, cation                  | 168.0 <sup>a</sup>  | 166.4  | 165.7   | 162.3  | 172.4  | 171.2   | 171.0  |
| # 733 Methoxy, radical               | -0.5 <sup>a</sup>   | 0.4    | -0.4    | 1.3    | 1.3    | -0.0    | 1.7    |
| # 734 Methoxy, anion                 | -36.0 <sup>a</sup>  | -46.1  | -46.9   | -42.4  | -51.1  | -52.4   | -48.6  |
| # 745 Ethylene oxide                 | -12.6 <sup>a</sup>  | -13.3  | -14.8   | -10.1  | -8.8   | -11.2   | -5.1   |
| # 746 Ethoxy, anion                  | -47.5 <sup>a</sup>  | -52.7  | -54.6   | -49.9  | -58.1  | -61.2   | -56.3  |
| # 749 Ethanol                        | -56.2 <sup>a</sup>  | -56.9  | -59.1   | -56.7  | -57.2  | -60.8   | -56.6  |
| # 755 Propanal                       | -45.5 <sup>a</sup>  | -49.1  | -52.1   | -49.0  | -51.2  | -55.9   | -51.4  |
| # 756 Trimethylene oxide             | -19.2 <sup>a</sup>  | -17.7  | -20.6   | -18.8  | -15.8  | -20.5   | -17.2  |
| # 757 Isopropanol                    | -65.1 <sup>a</sup>  | -66.7  | -70.5   | -68.7  | -67.2  | -73.1   | -67.5  |
| # 758 Methyl ethyl ether             | -51.7 <sup>a</sup>  | -53.4  | -56.8   | -53.0  | -50.6  | -56.0   | -51.9  |
| # 759 Propanol                       | -61.2 <sup>a</sup>  | -61.5  | -65.3   | -62.9  | -62.5  | -68.4   | -62.6  |
| # 760 Acetyl acetylene               | 15.6 <sup>a</sup>   | 11.2   | 8.5     | 10.9   | 9.8    | 5.5     | 10.2   |
| # 763 2,3-Dihydrofuran               | -17.3 <sup>a</sup>  | -19.1  | -22.9   | -20.6  | -19.0  | -25.0   | -20.1  |
| # 764 Crotonaldehyde                 | -24.0 <sup>a</sup>  | -27.9  | -31.5   | -27.9  | -29.5  | -35.1   | -30.0  |
| # 765 Divinyl ether                  | -3.3 <sup>a</sup>   | 4.0    | 0.4     | 2.5    | 4.8    | -0.7    | 2.9    |
| # 766 Butanal                        | -48.9 <sup>a</sup>  | -53.7  | -58.1   | -53.6  | -56.0  | -62.9   | -56.4  |
| # 767 Isobutanal                     | -51.6 <sup>a</sup>  | -56.0  | -60.7   | -56.2  | -57.1  | -64.3   | -57.5  |
| # 768 Methyl ethyl ketone            | -57.1 <sup>a</sup>  | -62.4  | -66.9   | -62.2  | -63.7  | -70.7   | -63.0  |
| # 769 Tetrahydrofuran                | -44.0 <sup>a</sup>  | -47.9  | -52.5   | -48.9  | -46.1  | -53.5   | -47.3  |
| # 770 Diethyl ether                  | -60.3 <sup>a</sup>  | -61.1  | -65.9   | -60.2  | -58.4  | -65.7   | -59.4  |
| # 771 t-Butanol                      | -74.7 <sup>a</sup>  | -76.8  | -82.4   | -78.1  | -75.9  | -84.5   | -76.1  |
| # 773 2,3-Dihydro-5-methyl-furan     | -31.1 <sup>a</sup>  | -30.2  | -35.4   | -31.1  | -30.2  | -38.2   | -30.8  |
| # 774 2-Ethylacrolein                | -31.4 <sup>a</sup>  | -32.1  | -37.5   | -31.9  | -32.9  | -41.2   | -33.2  |
| # 775 3,4-Dihydro-2H-pyran           | -27.0 <sup>a</sup>  | -24.5  | -30.1   | -26.2  | -24.3  | -33.0   | -26.0  |
| # 776 3-Penten-2-one                 | -32.6 <sup>a</sup>  | -42.0  | -47.0   | -41.9  | -43.1  | -50.8   | -42.7  |
| # 777 Cyclopentanone                 | -46.0 <sup>a</sup>  | -55.0  | -60.6   | -54.7  | -57.5  | -66.1   | -56.9  |
| # 778 Diethyl ketone                 | -61.6 <sup>a</sup>  | -67.1  | -73.4   | -66.9  | -67.9  | -76.7   | -67.9  |
| # 779 Tetrahydropyran                | -53.4 <sup>a</sup>  | -53.1  | -59.6   | -54.5  | -51.7  | -61.8   | -53.8  |
| # 780 t-Butyl methyl ether           | -67.8 <sup>a</sup>  | -70.5  | -77.9   | -71.4  | -66.1  | -77.2   | -68.3  |
| # 781 Phenoxy, anion                 | -40.5 <sup>a</sup>  | -39.2  | -44.3   | -36.1  | -46.2  | -54.4   | -43.3  |
| # 782 Phenol                         | -23.0 <sup>a</sup>  | -21.7  | -27.2   | -22.4  | -23.6  | -32.3   | -23.2  |
| # 783 4-Methyl-3-penten-2-one        | -42.6 <sup>a</sup>  | -51.2  | -58.0   | -51.1  | -51.7  | -62.2   | -51.2  |
| # 784 Cyclohexanone                  | -54.0 <sup>a</sup>  | -59.9  | -67.6   | -60.0  | -62.1  | -73.7   | -61.8  |
| # 785 Methyl neopentyl ketone        | -76.6 <sup>a</sup>  | -76.9  | -85.5   | -77.5  | -75.4  | -88.2   | -75.7  |
| # 786 Di-isopropyl ether             | -76.3 <sup>a</sup>  | -76.1  | -85.1   | -77.9  | -72.6  | -85.9   | -75.2  |
| # 787 Benzaldehyde                   | -8.8 <sup>a</sup>   | -14.5  | -20.9   | -13.6  | -15.6  | -25.6   | -15.7  |
| # 788 Anisole                        | -17.3 <sup>a</sup>  | -16.0  | -23.0   | -16.3  | -14.1  | -25.0   | -15.4  |
| # 789 m-Cresol                       | -31.9 <sup>a</sup>  | -31.1  | -38.3   | -32.6  | -32.6  | -43.7   | -32.4  |
| # 790 o-Cresol                       | -30.7 <sup>a</sup>  | -30.5  | -37.7   | -31.4  | -32.0  | -43.1   | -31.7  |
| # 791 p-Cresol                       | -29.9 <sup>a</sup>  | -30.6  | -37.7   | -31.5  | -32.2  | -43.3   | -32.0  |
| # 792 2-Methyl-5-hexen-3-yn-2-ol     | 11.0 <sup>a</sup>   | 6.8    | -0.4    | 5.1    | 7.6    | -3.3    | 7.5    |

... continued on next page ...



Table S71: ... continued from previous page ...

| Species                                  | Ref.               | OM2   | OM2-D3T | ODM2  | OM3   | OM3-D3T | ODM3  |
|------------------------------------------|--------------------|-------|---------|-------|-------|---------|-------|
| # 793 2-Norbornanone                     | -40.8 <sup>a</sup> | -45.8 | -54.6   | -46.6 | -46.7 | -60.3   | -47.7 |
| # 794 cis-2,3-Epoxybicyclo[2.2.1]heptane | -12.9 <sup>a</sup> | -6.8  | -15.4   | -5.2  | -1.8  | -15.1   | 0.1   |
| # 795 Norbornan-7-one                    | -32.0 <sup>a</sup> | -41.2 | -49.9   | -41.8 | -42.4 | -55.9   | -43.1 |
| # 796 1-Methoxy cyclohexene              | -38.5 <sup>a</sup> | -37.0 | -45.9   | -37.7 | -35.9 | -49.5   | -37.3 |
| # 797 Bicyclo[2.2.1]heptan-7-ol          | -52.0 <sup>a</sup> | -52.9 | -62.8   | -56.0 | -52.6 | -67.7   | -54.1 |
| # 798 cis-1,2-Epoxybicycloheptane        | -36.4 <sup>a</sup> | -27.6 | -37.0   | -26.0 | -25.1 | -39.4   | -22.9 |
| # 799 Cycloheptanone                     | -59.3 <sup>a</sup> | -59.3 | -69.1   | -59.8 | -61.7 | -76.5   | -61.7 |
| # 800 2,4-Dimethyl 3-pentanone           | -74.4 <sup>a</sup> | -80.7 | -90.5   | -81.5 | -79.8 | -94.5   | -80.6 |
| # 801 2-Methyl cis-cyclohexanol          | -71.9 <sup>a</sup> | -73.9 | -84.8   | -76.6 | -74.1 | -90.5   | -75.5 |
| # 802 3,3-Dimethyl-2-pentanone           | -72.6 <sup>a</sup> | -80.2 | -90.7   | -80.8 | -78.4 | -94.1   | -78.9 |
| # 803 4-Heptanone                        | -71.3 <sup>a</sup> | -76.3 | -85.7   | -76.6 | -77.6 | -91.2   | -77.3 |
| # 804 Heptanal                           | -63.1 <sup>a</sup> | -67.4 | -76.4   | -67.9 | -70.5 | -84.1   | -71.5 |
| # 805 t-Butyl ethyl ketone               | -75.0 <sup>a</sup> | -81.3 | -91.6   | -82.0 | -79.3 | -94.7   | -79.7 |
| # 806 n-Heptanol                         | -81.2 <sup>a</sup> | -80.1 | -89.8   | -80.8 | -81.5 | -96.1   | -81.8 |
| # 807 t-Butyl isopropyl ether            | -85.5 <sup>a</sup> | -86.6 | -97.5   | -88.1 | -81.4 | -97.6   | -84.4 |
| # 808 Benzofuran                         | 3.3 <sup>a</sup>   | 9.2   | 2.1     | 8.5   | 9.3   | -1.8    | 9.4   |
| # 809 1,3-Dihydro isobenzofuran          | -7.2 <sup>a</sup>  | -16.2 | -24.3   | -16.9 | -13.8 | -26.3   | -15.4 |
| # 810 1-Phenylethenol                    | -11.0 <sup>a</sup> | -7.3  | -15.4   | -8.2  | -7.9  | -20.4   | -8.0  |
| # 811 2,3-Dihydro-benzofuran             | -11.1 <sup>a</sup> | -14.8 | -22.8   | -15.9 | -14.2 | -26.6   | -15.2 |
| # 812 Acetophenone                       | -20.7 <sup>a</sup> | -27.4 | -35.5   | -26.5 | -27.6 | -40.0   | -26.9 |
| # 813 2,3-Dimethyl phenol                | -37.6 <sup>a</sup> | -39.5 | -48.7   | -40.3 | -39.8 | -53.8   | -39.5 |
| # 814 2,4-Dimethyl phenol                | -39.0 <sup>a</sup> | -39.5 | -48.4   | -40.5 | -40.3 | -54.0   | -40.1 |
| # 815 2,5-Dimethyl phenol                | -38.7 <sup>a</sup> | -39.9 | -48.8   | -40.8 | -40.6 | -54.3   | -40.3 |
| # 816 2,6-Dimethyl phenol                | -38.7 <sup>a</sup> | -39.0 | -48.0   | -40.4 | -40.0 | -53.8   | -39.9 |
| # 817 2-Ethyl phenol                     | -34.7 <sup>a</sup> | -35.1 | -44.2   | -36.3 | -36.4 | -50.2   | -36.3 |
| # 818 3,4-Dimethyl phenol                | -37.4 <sup>a</sup> | -39.9 | -48.9   | -41.0 | -40.6 | -54.5   | -40.6 |
| # 819 3,5-Dimethyl phenol                | -38.6 <sup>a</sup> | -40.5 | -49.3   | -42.2 | -41.6 | -55.1   | -42.0 |
| # 820 3-Ethyl phenol                     | -34.9 <sup>a</sup> | -35.8 | -44.7   | -36.9 | -37.2 | -50.8   | -37.1 |
| # 821 4-Ethyl phenol                     | -34.5 <sup>a</sup> | -35.3 | -44.2   | -36.4 | -36.8 | -50.4   | -36.8 |
| # 822 Benzyl alcohol                     | -22.6 <sup>a</sup> | -31.5 | -40.4   | -32.6 | -32.1 | -45.7   | -32.8 |
| # 823 Ethoxybenzene                      | -24.3 <sup>a</sup> | -24.0 | -32.4   | -23.7 | -22.1 | -35.0   | -23.1 |
| # 824 Phenetole                          | -26.3 <sup>a</sup> | -23.5 | -32.4   | -24.8 | -21.7 | -35.1   | -23.6 |
| # 825 1-Methylnorcamphor                 | -48.9 <sup>a</sup> | -54.8 | -65.7   | -56.0 | -54.8 | -71.2   | -56.2 |
| # 826 Bicyclo[2.2.2]octanone             | -52.2 <sup>a</sup> | -57.3 | -68.4   | -57.4 | -58.8 | -75.6   | -59.0 |
| # 827 Bicyclo[3.2.1]octan-2-one          | -52.0 <sup>a</sup> | -57.0 | -68.1   | -57.5 | -57.9 | -74.7   | -58.3 |
| # 828 Bicyclo[3.2.1]octan-3-one          | -52.9 <sup>a</sup> | -58.1 | -69.2   | -58.7 | -59.4 | -76.1   | -60.0 |
| # 829 Bicyclo[3.2.1]octan-8-one          | -46.2 <sup>a</sup> | -54.6 | -65.7   | -55.3 | -55.9 | -72.7   | -56.5 |
| # 830 cis-Bicyclo[3.3.0]-octan-2-one     | -55.0 <sup>a</sup> | -60.3 | -70.9   | -60.6 | -62.4 | -78.3   | -62.2 |
| # 831 trans-Bicyclo[3.3.0]-octan-2-one   | -49.4 <sup>a</sup> | -46.3 | -56.7   | -47.3 | -49.3 | -65.0   | -50.0 |
| # 832 3-Oxabicyclo[3.2.2]nonane          | -53.2 <sup>a</sup> | -50.1 | -62.4   | -52.2 | -48.9 | -67.3   | -51.6 |
| # 833 6-Methyl-5-hepten-2-one            | -60.1 <sup>a</sup> | -57.8 | -67.8   | -58.2 | -59.4 | -74.4   | -59.8 |
| # 834 8-Oxatricyclo[3,2,1,0(1,5)]octane  | 6.4 <sup>a</sup>   | 28.7  | 17.2    | 30.8  | 34.1  | 16.7    | 33.5  |
| # 835 Bicyclo(2.2.2)octan-2-ol           | -68.0 <sup>a</sup> | -64.5 | -76.8   | -67.0 | -65.2 | -83.7   | -66.3 |
| # 836 cis-1,2-Epoxybicyclooctane         | -39.5 <sup>a</sup> | -24.6 | -36.2   | -23.3 | -23.0 | -40.3   | -21.0 |
| # 837 Cyclooctanone                      | -65.1 <sup>a</sup> | -62.8 | -74.7   | -64.1 | -65.7 | -83.6   | -66.8 |
| # 838 2,2,4-Trimethyl-3-pentanone        | -80.9 <sup>a</sup> | -88.0 | -100.4  | -89.4 | -85.1 | -103.5  | -86.3 |
| # 839 2-Octanone                         | -82.5 <sup>a</sup> | -80.7 | -91.3   | -81.2 | -83.0 | -98.9   | -83.2 |
| # 840 3,3,4-Trimethyl pentan-2-one       | -78.5 <sup>a</sup> | -86.2 | -99.2   | -87.6 | -83.2 | -102.4  | -84.6 |
| # 841 3-Octanone                         | -80.9 <sup>a</sup> | -80.9 | -91.6   | -81.3 | -82.4 | -98.5   | -82.4 |
| # 842 4-Octanone                         | -83.5 <sup>a</sup> | -80.9 | -91.8   | -81.3 | -82.4 | -98.3   | -82.3 |
| # 843 Octanal                            | -69.8 <sup>a</sup> | -72.0 | -82.5   | -72.7 | -75.3 | -91.2   | -76.6 |
| # 844 1-Octanol                          | -85.3 <sup>a</sup> | -84.7 | -95.9   | -85.5 | -86.3 | -103.1  | -86.9 |
| # 845 1-Tert-butoxybutane                | -86.3 <sup>a</sup> | -87.8 | -99.6   | -88.6 | -83.4 | -101.1  | -86.4 |
| # 846 2-(1,1-Dimethylethoxy)-butane      | -90.8 <sup>a</sup> | -90.9 | -103.9  | -92.9 | -85.4 | -104.5  | -88.9 |
| # 847 Di-n-butyl ether                   | -79.8 <sup>a</sup> | -80.1 | -90.9   | -79.8 | -77.7 | -93.9   | -79.4 |
| # 848 Di-sec-butyl ether                 | -86.3 <sup>a</sup> | -85.2 | -97.8   | -87.5 | -81.2 | -99.6   | -84.3 |
| # 849 sec-Butyl-tert-butyl ether         | -88.0 <sup>a</sup> | -89.6 | -102.1  | -91.1 | -84.3 | -102.7  | -87.4 |
| # 850 tert-Butyl ether                   | -86.3 <sup>a</sup> | -92.3 | -105.7  | -94.6 | -85.1 | -104.9  | -88.7 |
| # 851 tert-Butyl isobutyl ether          | -88.0 <sup>a</sup> | -89.6 | -102.1  | -91.1 | -84.3 | -102.7  | -87.4 |
| # 852 3,4-Dihydro-1H-2-benzopyran        | -15.1 <sup>a</sup> | -22.2 | -32.3   | -23.2 | -19.5 | -35.0   | -21.9 |
| # 853 3,4-Dihydro-2H-1-benzopyran        | -19.7 <sup>a</sup> | -21.8 | -31.8   | -23.1 | -20.6 | -36.0   | -22.4 |
| # 854 Benzyl methyl ketone               | -22.6 <sup>a</sup> | -32.3 | -42.2   | -32.0 | -33.3 | -48.4   | -33.7 |
| # 855 2-(1-Methylethyl)-phenol           | -41.9 <sup>a</sup> | -41.4 | -52.4   | -42.8 | -41.7 | -58.3   | -42.0 |
| # 856 2,4,6-Trimethyl phenol             | -42.3 <sup>a</sup> | -48.4 | -59.0   | -49.7 | -48.6 | -64.8   | -48.7 |
| # 857 3-(1-Methylethyl)-phenol           | -41.9 <sup>a</sup> | -42.1 | -53.1   | -43.6 | -42.8 | -59.3   | -43.2 |

... continued on next page ...

Table S71: ... continued from previous page ...

| Species                                        | Ref.                | OM2    | OM2-D3T | ODM2   | OM3    | OM3-D3T | ODM3   |
|------------------------------------------------|---------------------|--------|---------|--------|--------|---------|--------|
| # 858 4-(-1-Methylethyl)-phenol                | -41.9 <sup>a</sup>  | -41.6  | -52.5   | -43.1  | -42.3  | -58.8   | -42.8  |
| # 859 2,6,6-Trimethyl-2-cyclohexen-1-one       | -55.6 <sup>a</sup>  | -57.7  | -70.2   | -58.4  | -55.7  | -74.4   | -56.4  |
| # 860 Bicycle[3.3.1]nonan-9-one -check -3-one  | -57.3 <sup>a</sup>  | -60.4  | -73.8   | -61.3  | -61.4  | -81.6   | -62.4  |
| # 861 cis Octahydro-2H-inden-2-one             | -59.7 <sup>a</sup>  | -62.3  | -75.1   | -62.9  | -65.3  | -84.4   | -66.0  |
| # 862 trans Octahydro-2H-inden-2-one           | -59.6 <sup>a</sup>  | -64.1  | -76.8   | -65.6  | -66.8  | -85.7   | -68.7  |
| # 863 Cyclononane                              | -66.9 <sup>a</sup>  | -64.1  | -78.4   | -66.1  | -67.3  | -88.4   | -69.2  |
| # 864 2,6-Dimethyl-4-heptanone                 | -85.5 <sup>a</sup>  | -89.1  | -102.5  | -90.6  | -89.0  | -108.7  | -90.2  |
| # 865 2-Nonanone                               | -81.4 <sup>a</sup>  | -85.3  | -97.4   | -86.0  | -87.8  | -106.0  | -88.3  |
| # 866 3,3,4,4-Tetramethyl-2-pentanone          | -83.1 <sup>a</sup>  | -92.4  | -108.1  | -94.4  | -86.9  | -110.0  | -89.3  |
| # 867 5-Nonanone                               | -82.4 <sup>a</sup>  | -84.5  | -96.5   | -86.2  | -86.9  | -105.0  | -88.3  |
| # 868 Di-tert-butyl ketone                     | -82.7 <sup>a</sup>  | -92.3  | -107.2  | -93.8  | -86.7  | -108.7  | -88.4  |
| # 869 1-Nonanol                                | -89.8 <sup>a</sup>  | -89.2  | -101.9  | -90.3  | -91.1  | -110.2  | -91.9  |
| # 870 Amyl-t-butyl ether                       | -91.0 <sup>a</sup>  | -92.4  | -105.7  | -93.1  | -88.3  | -108.2  | -91.0  |
| # 871 Butyl 1,1-dimethylpropyl ether           | -91.3 <sup>a</sup>  | -91.7  | -105.6  | -92.4  | -87.0  | -107.5  | -89.7  |
| # 872 4-Phenyl-3-buten-2-one                   | -11.5 <sup>a</sup>  | -11.7  | -21.8   | -11.2  | -12.1  | -27.7   | -12.1  |
| # 873 2-Adamantone                             | -55.1 <sup>a</sup>  | -64.0  | -78.9   | -65.1  | -63.9  | -86.4   | -65.5  |
| # 874 2-Isopropyl-4-methylphenol               | -47.4 <sup>a</sup>  | -49.5  | -62.4   | -52.2  | -49.1  | -68.5   | -49.8  |
| # 875 2-Isopropyl-5-methylphenol               | -44.1 <sup>a</sup>  | -50.7  | -63.4   | -52.3  | -50.6  | -69.6   | -51.1  |
| # 876 2-Isopropyl-6-methylphenol               | -45.4 <sup>a</sup>  | -49.4  | -62.4   | -52.0  | -48.7  | -68.2   | -49.3  |
| # 877 2-Methyl-5-isopropylphenol               | -46.4 <sup>a</sup>  | -50.9  | -63.6   | -52.4  | -50.7  | -69.9   | -51.2  |
| # 878 3-Isopropyl-2-methylphenol               | -43.6 <sup>a</sup>  | -48.9  | -62.0   | -50.2  | -48.3  | -68.0   | -48.7  |
| # 879 3-Methyl-2-isopropylphenol               | -41.0 <sup>a</sup>  | -48.0  | -61.4   | -51.0  | -47.0  | -67.0   | -47.5  |
| # 880 3-Methyl-5-isopropylphenol               | -50.2 <sup>a</sup>  | -51.5  | -64.1   | -53.7  | -51.7  | -70.7   | -52.3  |
| # 881 4-Isopropyl-2-methylphenol               | -49.4 <sup>a</sup>  | -50.5  | -63.2   | -52.1  | -50.3  | -69.5   | -50.9  |
| # 882 4-Isopropyl-3-methylphenol               | -44.0 <sup>a</sup>  | -47.2  | -60.4   | -48.8  | -47.2  | -66.9   | -47.9  |
| # 883 4-Methyl-3-isopropylphenol               | -44.2 <sup>a</sup>  | -47.2  | -60.4   | -48.8  | -47.2  | -66.9   | -47.9  |
| # 884 m-tert-Butylphenol                       | -44.3 <sup>a</sup>  | -48.5  | -61.8   | -50.3  | -47.1  | -67.1   | -48.2  |
| # 885 o-sec-Butylphenol                        | -45.8 <sup>a</sup>  | -45.0  | -58.0   | -46.6  | -45.0  | -64.6   | -45.8  |
| # 886 o-tert-Butylphenol                       | -47.6 <sup>a</sup>  | -47.8  | -61.3   | -50.0  | -45.9  | -66.1   | -47.2  |
| # 887 p-sec-Butylphenol                        | -45.6 <sup>a</sup>  | -45.8  | -58.5   | -47.6  | -46.6  | -65.7   | -47.5  |
| # 888 p-tert-Butyl phenol                      | -44.5 <sup>a</sup>  | -47.9  | -61.2   | -49.7  | -46.6  | -66.5   | -47.8  |
| # 889 1-Adamantol                              | -74.3 <sup>a</sup>  | -76.5  | -92.5   | -79.2  | -75.1  | -99.1   | -77.5  |
| # 890 2-Adamantol                              | -71.5 <sup>a</sup>  | -71.9  | -88.2   | -75.5  | -71.1  | -95.4   | -73.8  |
| # 891 Camphor                                  | -63.9 <sup>a</sup>  | -67.2  | -83.0   | -69.4  | -64.5  | -87.9   | -67.4  |
| # 892 Octahydro-3a-methyl-cis-2H-inden-2-one   | -68.6 <sup>a</sup>  | -72.7  | -88.1   | -74.4  | -73.6  | -96.5   | -76.0  |
| # 893 Octahydro-3a-methyl-trans-2H-inden-2-one | -65.8 <sup>a</sup>  | -69.2  | -84.6   | -71.0  | -69.8  | -92.8   | -72.5  |
| # 894 Beta-caran-3-ol                          | -61.9 <sup>a</sup>  | -57.3  | -72.8   | -59.2  | -56.7  | -79.5   | -58.0  |
| # 895 Cyclodecanone                            | -72.9 <sup>a</sup>  | -66.5  | -82.8   | -69.1  | -70.1  | -93.9   | -72.6  |
| # 896 2,2,5,5-Tetramethyl-3-hexanone           | -94.1 <sup>a</sup>  | -99.3  | -116.0  | -101.8 | -95.0  | -119.5  | -97.8  |
| # 897 Decanol                                  | -94.5 <sup>a</sup>  | -93.8  | -108.0  | -95.0  | -96.0  | -117.3  | -97.0  |
| # 898 Dipentyl ether                           | -93.1 <sup>a</sup>  | -87.5  | -101.6  | -88.7  | -86.0  | -107.2  | -88.7  |
| # 899 2,4,5-Trimethyl-acetophenone             | -45.2 <sup>a</sup>  | -54.3  | -68.0   | -54.1  | -52.6  | -73.2   | -52.9  |
| # 900 2,4,6-Trimethyl-acetophenone             | -49.0 <sup>a</sup>  | -53.3  | -67.2   | -53.6  | -52.3  | -73.0   | -53.0  |
| # 901 2-tert-Butyl-p-cresol                    | -49.5 <sup>a</sup>  | -56.7  | -71.9   | -59.7  | -54.4  | -75.5   | -56.5  |
| # 902 3-Methyl-2-phenylbutane-2-ol             | -50.5 <sup>a</sup>  | -57.6  | -73.2   | -59.4  | -53.4  | -76.6   | -55.2  |
| # 903 Cycloundecanone                          | -77.0 <sup>a</sup>  | -69.7  | -88.0   | -72.4  | -73.2  | -100.0  | -76.5  |
| # 904 2,2,6,6-Tetramethyl-4-heptanone          | -100.7 <sup>a</sup> | -104.0 | -122.4  | -107.0 | -100.3 | -127.2  | -103.7 |
| # 905 Dipentyl ketone                          | -92.6 <sup>a</sup>  | -94.6  | -110.0  | -95.6  | -96.9  | -119.5  | -98.1  |
| # 906 Decyl methyl ether                       | -91.1 <sup>a</sup>  | -90.3  | -105.8  | -91.3  | -89.3  | -112.5  | -92.3  |
| # 907 Dibenzofuran                             | 11.3 <sup>a</sup>   | 17.2   | 5.7     | 16.5   | 17.5   | -0.2    | 17.3   |
| # 908 m-Hydroxybiphenyl                        | 5.1 <sup>a</sup>    | -1.5   | -14.1   | -2.1   | -2.0   | -21.2   | -2.2   |
| # 909 o-Hydroxybiphenyl                        | 4.0 <sup>a</sup>    | -0.2   | -12.9   | -1.0   | -0.4   | -19.9   | -0.8   |
| # 910 p-Hydroxybiphenyl                        | 0.0 <sup>a</sup>    | -1.3   | -13.8   | -1.9   | -1.8   | -21.0   | -2.0   |
| # 911 Isobutyl phenyl ketone                   | -38.4 <sup>a</sup>  | -51.6  | -67.4   | -52.4  | -50.0  | -73.4   | -51.3  |
| # 912 2,6-Diisopropylphenol                    | -60.7 <sup>a</sup>  | -60.3  | -77.2   | -62.8  | -58.3  | -83.4   | -59.8  |
| # 913 Benzophenone                             | 11.9 <sup>a</sup>   | 3.0    | -10.6   | 4.0    | 4.4    | -16.4   | 4.3    |
| # 914 Anthone                                  | 5.6 <sup>a</sup>    | -1.2   | -16.1   | -0.9   | 0.0    | -22.8   | -0.5   |
| # 915 1,1'-Diadamantylketone                   | -87.9 <sup>a</sup>  | -89.9  | -126.5  | -94.6  | -84.1  | -137.8  | -91.2  |
| # 1051 Formate, anion                          | -106.6 <sup>a</sup> | -111.8 | -112.4  | -109.0 | -118.7 | -119.8  | -118.1 |
| # 1056 Acetate, anion                          | -122.5 <sup>a</sup> | -121.9 | -123.6  | -120.5 | -127.6 | -130.5  | -127.0 |
| # 1057 Acetic acid                             | -103.3 <sup>a</sup> | -101.0 | -103.0  | -102.2 | -102.7 | -106.0  | -103.8 |
| # 1058 Acetic acid                             | -103.3 <sup>a</sup> | -101.0 | -103.0  | -102.2 | -102.7 | -106.0  | -103.8 |
| # 1061 Dimethyl peroxide                       | -30.1 <sup>a</sup>  | -37.3  | -39.9   | -36.1  | -30.7  | -34.6   | -31.7  |
| # 1062 Ethylene glycol                         | -93.9 <sup>a</sup>  | -91.7  | -94.6   | -94.8  | -93.6  | -98.1   | -94.5  |
| # 1067 2-Oxo-propanal                          | -64.8 <sup>a</sup>  | -74.0  | -76.8   | -73.2  | -77.0  | -81.4   | -76.6  |

... continued on next page ...

Table S71: ... continued from previous page ...

| Species                               | Ref.                | OM2    | OM2-D3T | ODM2   | OM3    | OM3-D3T | ODM3   |
|---------------------------------------|---------------------|--------|---------|--------|--------|---------|--------|
| # 1068 2-Propenoic acid               | -79.0 <sup>a</sup>  | -74.4  | -77.2   | -75.4  | -74.8  | -79.2   | -75.6  |
| # 1069 beta-Propiolactone             | -67.6 <sup>a</sup>  | -54.2  | -56.8   | -55.3  | -54.0  | -58.3   | -56.4  |
| # 1070 1,3-Dioxalane                  | -72.1 <sup>a</sup>  | -78.5  | -82.0   | -79.9  | -70.8  | -76.2   | -74.0  |
| # 1071 Ethyl formate                  | -95.2 <sup>a</sup>  | -89.8  | -93.3   | -90.6  | -87.7  | -93.2   | -90.4  |
| # 1072 Methyl acetate                 | -97.9 <sup>a</sup>  | -95.7  | -99.0   | -96.2  | -93.8  | -99.0   | -96.7  |
| # 1073 Propionic acid                 | -108.4 <sup>a</sup> | -106.3 | -109.8  | -107.6 | -107.5 | -113.0  | -108.4 |
| # 1074 1,3-Propanediol                | -97.6 <sup>a</sup>  | -97.5  | -101.7  | -97.7  | -98.1  | -104.5  | -97.8  |
| # 1075 2-Methoxyethanol               | -90.1 <sup>a</sup>  | -89.2  | -93.1   | -89.1  | -86.3  | -92.4   | -87.6  |
| # 1076 Dimethoxymethane               | -83.2 <sup>a</sup>  | -85.6  | -89.7   | -86.7  | -78.3  | -84.5   | -82.6  |
| # 1077 Propylene glycol               | -102.7 <sup>a</sup> | -101.4 | -105.9  | -103.8 | -102.1 | -108.9  | -102.5 |
| # 1078 2-Butenoic acid                | -88.1 <sup>a</sup>  | -84.7  | -88.8   | -85.7  | -85.6  | -91.9   | -86.1  |
| # 1079 2-Methyl-2-propenic acid       | -87.8 <sup>a</sup>  | -83.7  | -88.0   | -84.3  | -83.5  | -90.2   | -83.9  |
| # 1080 Diacetyl                       | -78.2 <sup>a</sup>  | -89.2  | -93.4   | -88.5  | -91.6  | -98.2   | -90.5  |
| # 1081 gamma Butyrolactone            | -87.0 <sup>a</sup>  | -88.9  | -93.3   | -89.7  | -87.9  | -94.7   | -89.4  |
| # 1082 Methyl 2-propenoate            | -79.6 <sup>a</sup>  | -69.2  | -73.1   | -69.9  | -66.0  | -72.2   | -68.5  |
| # 1083 1,1 Dimethoxy ethene           | -67.1 <sup>a</sup>  | -59.4  | -64.3   | -58.5  | -51.3  | -58.7   | -54.6  |
| # 1084 1,3 Dioxan                     | -80.9 <sup>a</sup>  | -82.9  | -88.3   | -84.7  | -75.9  | -84.1   | -80.7  |
| # 1085 1,4-Dioxane                    | -75.5 <sup>a</sup>  | -76.5  | -81.8   | -79.3  | -72.4  | -80.5   | -76.3  |
| # 1086 Ethyl acetate                  | -106.5 <sup>a</sup> | -103.9 | -108.5  | -104.7 | -102.1 | -109.2  | -104.7 |
| # 1087 1,2-Dimethoxyethane            | -81.9 <sup>a</sup>  | -85.5  | -90.7   | -85.3  | -79.5  | -87.4   | -82.6  |
| # 1088 1,4 Butandiol                  | -101.8 <sup>a</sup> | -102.7 | -108.4  | -103.1 | -103.6 | -112.2  | -103.4 |
| # 1089 Diethyl peroxide               | -46.1 <sup>a</sup>  | -48.9  | -54.7   | -49.4  | -44.4  | -53.0   | -45.9  |
| # 1090 Dimethyl acetal                | -93.1 <sup>a</sup>  | -95.1  | -100.7  | -94.8  | -86.5  | -95.1   | -90.9  |
| # 1091 Acetylacetone                  | -91.9 <sup>a</sup>  | -99.2  | -105.2  | -99.3  | -101.8 | -111.0  | -101.6 |
| # 1092 Ethyl propionate               | -111.5 <sup>a</sup> | -109.1 | -115.2  | -110.2 | -106.8 | -116.1  | -109.2 |
| # 1093 Isopropyl acetate              | -115.1 <sup>a</sup> | -113.7 | -120.2  | -114.2 | -111.3 | -121.1  | -113.8 |
| # 1094 1,5 Pentandiol                 | -105.6 <sup>a</sup> | -107.2 | -114.3  | -107.7 | -108.3 | -119.1  | -108.3 |
| # 1097 1,2-Benzenediol                | -65.7 <sup>a</sup>  | -56.6  | -62.7   | -59.1  | -60.3  | -69.9   | -60.1  |
| # 1098 Hydroquinone                   | -66.2 <sup>a</sup>  | -60.6  | -66.7   | -63.1  | -64.5  | -74.0   | -64.3  |
| # 1099 Resorcinol                     | -68.0 <sup>a</sup>  | -62.6  | -68.8   | -65.0  | -66.1  | -75.7   | -65.6  |
| # 1100 1,3-Cyclohexanedione           | -80.2 <sup>a</sup>  | -90.8  | -98.1   | -90.3  | -94.4  | -105.6  | -94.2  |
| # 1101 1,4-Cyclohexanedione           | -79.5 <sup>a</sup>  | -90.4  | -97.8   | -90.2  | -93.5  | -104.8  | -93.1  |
| # 1102 2,4-Hexanedione                | -105.1 <sup>a</sup> | -104.4 | -112.3  | -104.7 | -106.1 | -118.1  | -106.1 |
| # 1103 2-Oxepanone                    | -94.7 <sup>a</sup>  | -91.6  | -100.1  | -93.2  | -89.5  | -102.3  | -92.9  |
| # 1104 3-Methyl-2,4-pentandione       | -102.5 <sup>a</sup> | -106.1 | -114.1  | -106.4 | -107.2 | -119.2  | -107.1 |
| # 1105 Ethyl-(E)-2-butenolate         | -89.8 <sup>a</sup>  | -87.6  | -94.2   | -88.6  | -84.9  | -95.1   | -86.9  |
| # 1106 1,1-Dimethoxy-2-butene         | -72.4 <sup>a</sup>  | -76.2  | -84.1   | -77.3  | -67.9  | -79.1   | -72.2  |
| # 1107 4-Hydroxy-4-methylpentan-2-one | -116.2 <sup>a</sup> | -120.3 | -129.3  | -122.1 | -119.9 | -133.4  | -120.4 |
| # 1108 5,5-Dimethyl-1,3-dioxane       | -100.7 <sup>a</sup> | -98.2  | -107.5  | -101.0 | -88.6  | -102.6  | -94.7  |
| # 1109 cis-2,4-Dimethyl-1,3-dioxane   | -102.3 <sup>a</sup> | -104.6 | -113.0  | -105.4 | -96.5  | -109.4  | -101.5 |
| # 1110 Ethyl butanoate                | -115.9 <sup>a</sup> | -113.8 | -121.4  | -114.8 | -111.6 | -123.2  | -114.3 |
| # 1111 Hexanoic acid                  | -122.5 <sup>a</sup> | -120.3 | -128.3  | -121.5 | -121.9 | -134.1  | -123.5 |
| # 1112 Methyl 2-methylbutanoate       | -117.7 <sup>a</sup> | -112.7 | -121.0  | -114.3 | -109.1 | -121.6  | -111.7 |
| # 1113 Methyl 2,2-dimethyl-propanoate | -118.2 <sup>a</sup> | -117.1 | -125.7  | -118.7 | -111.6 | -124.7  | -114.5 |
| # 1114 Methyl 3-methylbutanoate       | -119.0 <sup>a</sup> | -112.3 | -120.7  | -113.5 | -109.3 | -121.8  | -112.3 |
| # 1115 Methyl pentanoate              | -112.7 <sup>a</sup> | -110.4 | -118.1  | -111.7 | -108.2 | -120.0  | -111.3 |
| # 1116 t-Butyl acetate                | -123.4 <sup>a</sup> | -123.9 | -132.5  | -125.6 | -119.9 | -132.9  | -123.6 |
| # 1117 trans 4,5-Dimethyl-1,3-dioxane | -98.2 <sup>a</sup>  | -99.7  | -108.6  | -101.7 | -90.8  | -104.3  | -96.5  |
| # 1118 1,1-Diethoxy ethane            | -108.4 <sup>a</sup> | -110.4 | -119.5  | -112.4 | -103.0 | -116.5  | -107.8 |
| # 1119 1,1-Dimethoxy-butane           | -101.7 <sup>a</sup> | -104.8 | -113.7  | -105.0 | -96.1  | -109.3  | -100.9 |
| # 1120 1,2-Diethoxy ethane            | -97.6 <sup>a</sup>  | -101.2 | -109.1  | -99.8  | -95.1  | -107.1  | -97.8  |
| # 1121 1,6-Hexanediol                 | -109.8 <sup>a</sup> | -111.9 | -120.5  | -112.6 | -113.3 | -126.4  | -113.5 |
| # 1122 2,3-Dimethyl-2,3-butanediol    | -129.2 <sup>a</sup> | -133.4 | -143.9  | -136.8 | -129.8 | -145.4  | -131.0 |
| # 1124 3-(2-Furanyl)-2-propenal       | -25.3 <sup>a</sup>  | -21.1  | -27.4   | -21.5  | -22.0  | -31.7   | -22.3  |
| # 1125 Benzoic acid                   | -70.1 <sup>a</sup>  | -71.1  | -78.0   | -71.2  | -71.0  | -81.8   | -71.3  |
| # 1126 Phenyl formate                 | -51.5 <sup>a</sup>  | -49.3  | -56.1   | -48.3  | -47.4  | -58.0   | -49.7  |
| # 1127 Tropolone                      | -37.2 <sup>a</sup>  | -24.9  | -32.0   | -25.6  | -27.3  | -38.3   | -26.2  |
| # 1128 3-Methyl-1,2-benzenediol       | -71.5 <sup>a</sup>  | -70.0  | -77.9   | -72.5  | -73.3  | -80.3   | -72.6  |
| # 1129 4-Methyl 1,2-Benzenediol       | -71.3 <sup>a</sup>  | -65.7  | -73.4   | -68.4  | -69.1  | -81.0   | -69.0  |
| # 1130 Ethyl 2-methylene-3-butenolate | -69.2 <sup>a</sup>  | -61.6  | -69.4   | -62.4  | -56.8  | -68.8   | -59.2  |
| # 1131 Ethyl 2-pentynoate             | -59.8 <sup>a</sup>  | -47.1  | -54.0   | -48.0  | -45.5  | -56.1   | -46.7  |
| # 1132 Ethyl 3-pentynoate             | -56.8 <sup>a</sup>  | -50.5  | -58.2   | -52.6  | -50.0  | -60.6   | -52.9  |
| # 1133 Ethyl 4-pentynoate             | -55.7 <sup>a</sup>  | -48.5  | -55.9   | -50.3  | -46.5  | -57.7   | -48.9  |
| # 1134 3,5-Heptanedione               | -104.9 <sup>a</sup> | -108.7 | -118.8  | -109.7 | -110.4 | -125.0  | -110.5 |
| # 1135 3-Ethyl-2,4-pentanedione       | -105.1 <sup>a</sup> | -110.8 | -120.7  | -111.6 | -111.8 | -126.6  | -112.3 |

... continued on next page ...

Table S71: ... continued from previous page ...

| Species                                       | Ref.                | OM2    | OM2-D3T | ODM2   | OM3    | OM3-D3T | ODM3   |
|-----------------------------------------------|---------------------|--------|---------|--------|--------|---------|--------|
| # 1136 5-Methyl-2,4-hexanedione               | -108.2 <sup>a</sup> | -111.2 | -120.9  | -112.0 | -112.2 | -126.7  | -112.6 |
| # 1137 Butyl 2-propenoate                     | -89.7 <sup>a</sup>  | -86.9  | -95.2   | -88.1  | -83.8  | -96.5   | -86.4  |
| # 1138 Ethyl (Z)-2-pentenoate                 | -94.3 <sup>a</sup>  | -92.1  | -100.3  | -93.2  | -89.4  | -101.8  | -91.6  |
| # 1139 Ethyl (Z)-3-pentenoate                 | -92.6 <sup>a</sup>  | -92.1  | -100.2  | -93.2  | -89.8  | -102.2  | -92.3  |
| # 1140 Ethyl 4-pentenoate                     | -92.1 <sup>a</sup>  | -88.1  | -96.5   | -89.3  | -85.6  | -98.3   | -88.8  |
| # 1141 Ethyl trans-2-pentenoate               | -94.2 <sup>a</sup>  | -92.1  | -100.3  | -93.2  | -89.4  | -101.8  | -91.6  |
| # 1142 Heptanolactone                         | -98.3 <sup>a</sup>  | -90.5  | -101.2  | -91.5  | -88.8  | -104.7  | -91.6  |
| # 1143 Isopropyl 2-butenolate                 | -98.2 <sup>a</sup>  | -97.3  | -105.8  | -98.1  | -94.1  | -107.0  | -96.6  |
| # 1144 Propyl (E)-2-butenolate                | -94.4 <sup>a</sup>  | -92.5  | -100.7  | -93.5  | -89.7  | -102.1  | -91.8  |
| # 1145 (2a,4a,6b)-2,4,6-Trimethyl-1,3-dioxane | -106.8 <sup>a</sup> | -114.1 | -124.3  | -114.8 | -105.5 | -120.7  | -110.7 |
| # 1146 1,1-Dimethoxycyclopentane              | -95.0 <sup>a</sup>  | -101.8 | -112.5  | -102.9 | -92.5  | -108.5  | -96.9  |
| # 1147 1,1-Dimethylpropyl acetate             | -128.8 <sup>a</sup> | -128.1 | -138.7  | -129.3 | -123.6 | -139.3  | -126.7 |
| # 1148 Ethyl 2-methylbutanoate                | -123.3 <sup>a</sup> | -120.8 | -130.8  | -122.2 | -117.3 | -132.1  | -120.0 |
| # 1149 Ethyl 3-methylbutanoate                | -126.0 <sup>a</sup> | -120.4 | -130.6  | -122.3 | -117.5 | -132.5  | -120.7 |
| # 1150 Ethyl pentanoate                       | -121.2 <sup>a</sup> | -118.4 | -127.5  | -119.8 | -116.4 | -130.2  | -119.3 |
| # 1151 Methyl 3,3-dimethylbutanoate           | -122.3 <sup>a</sup> | -120.1 | -130.8  | -122.0 | -115.4 | -131.4  | -119.3 |
| # 1152 Methyl hexanoate                       | -118.0 <sup>a</sup> | -114.9 | -124.2  | -116.3 | -113.0 | -127.1  | -116.4 |
| # 1153 1,3-Diethoxypropane                    | -104.3 <sup>a</sup> | -106.2 | -115.6  | -104.9 | -100.4 | -114.6  | -103.5 |
| # 1154 1,7-Heptanediol                        | -114.1 <sup>a</sup> | -116.4 | -126.6  | -117.3 | -118.0 | -133.4  | -118.5 |
| # 1155 m-Methylbenzoic acid                   | -78.4 <sup>a</sup>  | -80.4  | -89.0   | -81.3  | -79.9  | -93.1   | -80.3  |
| # 1156 Methyl benzoate                        | -66.8 <sup>a</sup>  | -65.7  | -74.0   | -65.7  | -62.1  | -74.9   | -64.2  |
| # 1157 o-Methylbenzoic acid                   | -76.6 <sup>a</sup>  | -79.6  | -88.5   | -80.1  | -78.6  | -92.3   | -79.1  |
| # 1158 p-Methylbenzoic acid                   | -79.0 <sup>a</sup>  | -80.8  | -89.4   | -81.7  | -80.4  | -93.6   | -81.4  |
| # 1159 1,3-Dioxolane-2-phenyl                 | -49.1 <sup>a</sup>  | -60.2  | -70.7   | -62.1  | -51.0  | -66.9   | -54.9  |
| # 1160 2,3-Dimethylbenzoic acid               | -82.7 <sup>a</sup>  | -88.9  | -99.7   | -89.3  | -86.4  | -102.8  | -86.8  |
| # 1161 2,4-Dimethylbenzoic acid               | -84.8 <sup>a</sup>  | -90.1  | -100.6  | -91.2  | -88.8  | -104.8  | -89.9  |
| # 1162 2,5-Dimethylbenzoic acid               | -83.9 <sup>a</sup>  | -89.5  | -100.0  | -90.0  | -88.1  | -104.2  | -88.7  |
| # 1163 2,6-Dimethylbenzoic acid               | -81.6 <sup>a</sup>  | -88.1  | -98.9   | -88.7  | -86.4  | -102.9  | -87.3  |
| # 1164 2-Ethylbenzoic acid                    | -81.4 <sup>a</sup>  | -83.8  | -94.7   | -84.8  | -82.3  | -98.8   | -83.2  |
| # 1165 3,4-Dimethylbenzoic acid               | -86.6 <sup>a</sup>  | -90.0  | -100.5  | -90.5  | -88.7  | -104.7  | -89.3  |
| # 1166 3,5-Dimethylbenzoic acid               | -87.1 <sup>a</sup>  | -89.7  | -99.9   | -91.4  | -88.8  | -104.4  | -89.4  |
| # 1167 3-Ethylbenzoic acid                    | -82.9 <sup>a</sup>  | -85.1  | -95.5   | -85.6  | -84.5  | -100.3  | -85.1  |
| # 1168 4-Ethylbenzoic acid                    | -85.0 <sup>a</sup>  | -85.6  | -95.9   | -86.1  | -85.0  | -100.7  | -85.5  |
| # 1169 Methyl 4-methylbenzoate                | -74.7 <sup>a</sup>  | -75.3  | -85.2   | -76.1  | -71.4  | -86.6   | -73.6  |
| # 1170 1,2-Naphthalenediol                    | -47.9 <sup>a</sup>  | -44.9  | -55.7   | -47.1  | -47.0  | -63.7   | -46.3  |
| # 1171 1,3-Naphthalenediol                    | -50.5 <sup>a</sup>  | -47.4  | -58.2   | -49.5  | -49.3  | -65.8   | -48.9  |
| # 1172 1,4-Naphthalenediol                    | -47.1 <sup>a</sup>  | -45.7  | -56.5   | -47.7  | -47.7  | -64.3   | -47.3  |
| # 1173 2,3-Naphthalenediol                    | -46.1 <sup>a</sup>  | -41.4  | -52.2   | -43.8  | -43.7  | -60.2   | -43.8  |
| # 1174 1-Phenyl-1,3-butanedione               | -58.3 <sup>a</sup>  | -69.4  | -80.9   | -69.2  | -69.0  | -86.1   | -68.9  |
| # 1175 2,3,4-Trimethylbenzoic acid            | -90.2 <sup>a</sup>  | -95.8  | -108.6  | -96.4  | -93.2  | -112.5  | -93.8  |
| # 1176 2,3,5-Trimethylbenzoic acid            | -91.3 <sup>a</sup>  | -98.0  | -110.5  | -98.6  | -95.1  | -114.0  | -95.8  |
| # 1177 2,3,6-Trimethylbenzoic acid            | -88.7 <sup>a</sup>  | -96.3  | -109.1  | -97.2  | -93.8  | -113.1  | -95.0  |
| # 1178 2,4,5-Trimethylbenzoic acid            | -92.3 <sup>a</sup>  | -99.0  | -111.5  | -99.8  | -96.9  | -115.8  | -97.7  |
| # 1179 2,4,6-Trimethylbenzoic acid            | -89.4 <sup>a</sup>  | -97.8  | -110.3  | -99.2  | -95.6  | -114.5  | -96.6  |
| # 1180 2-Isopropyl benzoic acid               | -85.8 <sup>a</sup>  | -90.5  | -103.3  | -91.5  | -87.7  | -107.0  | -89.0  |
| # 1181 2-Methyl-2-phenyl-1,3-dioxolane        | -62.6 <sup>a</sup>  | -73.3  | -85.8   | -74.9  | -63.2  | -81.9   | -67.1  |
| # 1182 3,4,5-Trimethylbenzoic acid            | -93.2 <sup>a</sup>  | -97.8  | -110.3  | -98.4  | -95.8  | -114.6  | -96.4  |
| # 1183 3-Isopropyl benzoic acid               | -89.8 <sup>a</sup>  | -91.6  | -104.0  | -92.5  | -90.2  | -108.8  | -91.3  |
| # 1184 4-Isopropyl benzoic acid               | -91.5 <sup>a</sup>  | -91.8  | -104.2  | -92.7  | -90.5  | -109.1  | -91.6  |
| # 1185 2-Isopropyl-6-methyl-pyrocatechol      | -90.6 <sup>a</sup>  | -89.9  | -103.4  | -93.1  | -91.4  | -111.7  | -91.5  |
| # 1186 Cyclohexyl butanoate                   | -130.4 <sup>a</sup> | -126.3 | -140.7  | -127.8 | -124.1 | -145.6  | -128.0 |
| # 1187 Ethyl octanoate                        | -136.2 <sup>a</sup> | -132.2 | -146.0  | -133.9 | -130.9 | -151.5  | -134.5 |
| # 1188 1,10-Decanediol                        | -125.0 <sup>a</sup> | -130.1 | -144.9  | -131.6 | -132.6 | -154.7  | -133.8 |
| # 1189 1-Naphthoic acid                       | -53.3 <sup>a</sup>  | -55.2  | -67.0   | -55.3  | -52.8  | -71.0   | -53.3  |
| # 1190 Isonaphthoic acid                      | -55.6 <sup>a</sup>  | -55.1  | -66.7   | -55.2  | -53.9  | -71.7   | -54.6  |
| # 1191 2,3,4,5-Tetramethylbenzoic acid        | -95.3 <sup>a</sup>  | -105.0 | -119.7  | -105.4 | -101.1 | -123.2  | -101.6 |
| # 1192 2,3,4,6-Tetramethylbenzoic acid        | -95.2 <sup>a</sup>  | -104.3 | -119.1  | -105.2 | -101.2 | -123.3  | -102.4 |
| # 1193 2,3,5,6-Tetramethylbenzoic acid        | -95.6 <sup>a</sup>  | -104.5 | -119.3  | -105.7 | -101.3 | -123.3  | -102.8 |
| # 1194 p-tert-Butyl benzoic acid              | -95.2 <sup>a</sup>  | -98.2  | -112.9  | -99.4  | -94.8  | -116.9  | -96.5  |
| # 1195 Oxacyclododecan-2-one                  | -123.6 <sup>a</sup> | -115.8 | -134.7  | -120.3 | -115.5 | -142.9  | -122.0 |
| # 1196 Ethyl nonanoate                        | -141.1 <sup>a</sup> | -136.8 | -152.1  | -138.6 | -135.7 | -158.5  | -138.9 |
| # 1197 1,1-Dibutoxypropane                    | -132.1 <sup>a</sup> | -135.1 | -151.5  | -135.3 | -126.4 | -150.6  | -131.6 |
| # 1198 5,5-Dimethyl-2-phenyl-1,3-dioxane      | -74.4 <sup>a</sup>  | -78.1  | -94.5   | -80.2  | -66.8  | -91.2   | -73.6  |
| # 1199 Pentamethylbenzoic acid                | -101.1 <sup>a</sup> | -109.8 | -126.8  | -110.6 | -105.6 | -130.9  | -106.9 |
| # 1200 2,2,6,6-Tetramethyl-3,5-heptanedione   | -126.3 <sup>a</sup> | -141.6 | -162.4  | -146.0 | -137.8 | -167.6  | -141.3 |

... continued on next page ...

Table S71: ... continued from previous page ...

| Species                                             | Ref.                | OM2    | OM2-D3T | ODM2   | OM3    | OM3-D3T | ODM3   |
|-----------------------------------------------------|---------------------|--------|---------|--------|--------|---------|--------|
| # 1201 Ethyl decanoate                              | -146.3 <sup>a</sup> | -141.3 | -158.2  | -143.4 | -140.6 | -165.6  | -144.6 |
| # 1202 Xanthone                                     | -23.5 <sup>a</sup>  | -26.8  | -40.2   | -27.7  | -24.8  | -45.4   | -25.7  |
| # 1203 Phenyl benzoate                              | -34.0 <sup>a</sup>  | -35.9  | -49.3   | -36.1  | -32.8  | -53.3   | -35.3  |
| # 1204 9,10-Anthroquinone                           | -18.1 <sup>a</sup>  | -32.7  | -47.5   | -31.4  | -30.4  | -53.0   | -29.5  |
| # 1205 9,10-Phenanthroquinone                       | -11.1 <sup>a</sup>  | -23.6  | -38.5   | -21.6  | -21.6  | -44.4   | -20.7  |
| # 1318 1,3,5-Trioxane                               | -111.3 <sup>a</sup> | -114.5 | -118.6  | -116.3 | -99.1  | -105.5  | -107.2 |
| # 1319 Methyl hydroxyacetate                        | -133.1 <sup>a</sup> | -130.5 | -134.3  | -132.3 | -128.2 | -134.1  | -130.6 |
| # 1320 Glycerol                                     | -138.1 <sup>a</sup> | -139.3 | -144.4  | -143.4 | -140.1 | -147.9  | -140.8 |
| # 1323 Maleic anhydride                             | -95.2 <sup>a</sup>  | -87.1  | -90.4   | -87.4  | -87.2  | -92.5   | -90.4  |
| # 1324 Acetic anhydride                             | -137.1 <sup>a</sup> | -139.5 | -143.9  | -139.7 | -138.8 | -145.7  | -142.3 |
| # 1325 Trimethoxymethane                            | -127.1 <sup>a</sup> | -129.8 | -136.2  | -131.1 | -115.0 | -124.5  | -122.5 |
| # 1326 2,5,8-Trioxanonane                           | -124.6 <sup>a</sup> | -125.5 | -133.8  | -124.8 | -116.1 | -128.7  | -120.9 |
| # 1328 m-Salicylic acid                             | -112.1 <sup>a</sup> | -110.8 | -118.4  | -112.7 | -112.5 | -124.2  | -112.9 |
| # 1329 o-Salicylic acid                             | -118.5 <sup>a</sup> | -114.7 | -122.5  | -116.8 | -116.0 | -128.0  | -115.9 |
| # 1330 p-Salicylic acid                             | -117.7 <sup>a</sup> | -112.3 | -119.8  | -114.1 | -113.8 | -125.5  | -114.0 |
| # 1331 2,3-Butanediol, 2,3-dimethyl-, monoformate   | -161.7 <sup>a</sup> | -162.7 | -174.8  | -164.4 | -155.8 | -173.8  | -159.8 |
| # 1332 Trimethoxymethyl benzene                     | -103.6 <sup>a</sup> | -112.5 | -125.9  | -113.9 | -94.9  | -115.5  | -103.0 |
| # 1333 1-tert-Butoxy-3-propoxy-2-propanol           | -169.2 <sup>a</sup> | -169.9 | -186.1  | -172.4 | -162.1 | -185.8  | -166.8 |
| # 1334 1-Butoxy-3-tert-butyl-2-propanol             | -172.8 <sup>a</sup> | -175.6 | -193.1  | -177.3 | -167.7 | -193.5  | -172.9 |
| # 1335 Benzoic acid, anhydride                      | -76.3 <sup>a</sup>  | -79.4  | -93.2   | -79.0  | -75.2  | -97.7   | -78.7  |
| # 1375 Oxalic acid                                  | -175.0 <sup>a</sup> | -162.5 | -165.0  | -163.1 | -164.2 | -168.1  | -164.3 |
| # 1378 Dioxybismethanol                             | -124.5 <sup>a</sup> | -123.2 | -127.0  | -125.6 | -115.4 | -121.2  | -119.0 |
| # 1380 1,4-Dioxan-2,5-dione                         | -146.3 <sup>a</sup> | -146.1 | -151.0  | -147.0 | -141.1 | -148.6  | -146.1 |
| # 1381 Dimethyl oxalate                             | -169.5 <sup>a</sup> | -158.8 | -163.6  | -159.9 | -152.9 | -160.4  | -157.1 |
| # 1382 1,3,5,7-Tetroxane                            | -148.2 <sup>a</sup> | -151.3 | -157.9  | -152.5 | -130.9 | -140.7  | -142.9 |
| # 1383 Dimethyl malonate                            | -176.4 <sup>a</sup> | -171.4 | -177.8  | -173.1 | -167.4 | -177.1  | -172.7 |
| # 1384 Ethylmalonic acid                            | -203.1 <sup>a</sup> | -195.3 | -202.8  | -197.7 | -196.6 | -207.9  | -199.0 |
| # 1385 Methylene diacetate                          | -186.6 <sup>a</sup> | -185.7 | -191.9  | -186.0 | -178.8 | -188.4  | -184.3 |
| # 1386 Tetramethoxymethane                          | -173.8 <sup>a</sup> | -180.0 | -188.5  | -180.6 | -157.6 | -170.2  | -167.9 |
| # 1387 1,1-Diacetoxymethane                         | -194.2 <sup>a</sup> | -198.5 | -207.0  | -199.6 | -191.0 | -203.6  | -197.2 |
| # 1388 Dimethyl methylmalonate                      | -183.7 <sup>a</sup> | -180.2 | -188.5  | -182.1 | -174.3 | -187.0  | -179.9 |
| # 1389 2,2-Diacetoxymethane                         | -199.3 <sup>a</sup> | -207.5 | -217.9  | -208.8 | -198.2 | -213.7  | -205.5 |
| # 1390 Diethyl malonate                             | -190.1 <sup>a</sup> | -188.4 | -198.2  | -191.1 | -184.2 | -197.9  | -189.0 |
| # 1391 Dimethyl dimethylmalonate                    | -191.9 <sup>a</sup> | -190.2 | -200.8  | -191.6 | -180.7 | -197.3  | -187.0 |
| # 1392 3,5,7,9-Tetraoxundecane                      | -177.1 <sup>a</sup> | -175.7 | -187.0  | -176.5 | -158.9 | -173.5  | -167.0 |
| # 1393 12-Crown-4                                   | -150.8 <sup>a</sup> | -149.4 | -163.7  | -155.5 | -140.4 | -161.4  | -151.8 |
| # 1394 5,8-Dihydroxy-1,4-naphthalenedione           | -119.3 <sup>a</sup> | -120.7 | -132.3  | -123.7 | -121.2 | -139.0  | -120.1 |
| # 1395 Dimethyl isophthalate                        | -150.4 <sup>a</sup> | -149.0 | -160.6  | -150.2 | -141.7 | -159.5  | -146.4 |
| # 1396 Dimethyl phthalate                           | -144.9 <sup>a</sup> | -144.8 | -157.3  | -146.8 | -137.9 | -156.5  | -143.5 |
| # 1397 1-(tert-Butyldioxy)-3-propoxy-2-propanol     | -157.0 <sup>a</sup> | -157.7 | -175.1  | -162.0 | -149.9 | -173.9  | -154.2 |
| # 1400 Benzal diacetate                             | -167.3 <sup>a</sup> | -166.6 | -180.5  | -168.0 | -157.9 | -178.5  | -164.7 |
| # 1401 1-Butoxy-1-tert-butyl-2-propanol             | -161.3 <sup>a</sup> | -175.3 | -194.8  | -178.2 | -163.7 | -190.6  | -168.9 |
| # 1402 1,1-Ethanediol, 2-phenyl-, diacetate         | -167.3 <sup>a</sup> | -173.0 | -188.7  | -174.5 | -164.8 | -188.0  | -172.3 |
| # 1403 Benzyl diacetate                             | -161.8 <sup>a</sup> | -173.0 | -188.7  | -174.5 | -164.8 | -188.0  | -172.3 |
| # 1406 1,4,9,10-Anthracenetetrone                   | -50.0 <sup>a</sup>  | -70.8  | -86.1   | -69.0  | -70.5  | -93.8   | -69.9  |
| # 1407 1,4-Dihydroxy-9,10-anthracenedione           | -112.6 <sup>a</sup> | -121.0 | -137.4  | -123.9 | -120.0 | -145.0  | -119.0 |
| # 1408 Diphenyl oxalate                             | -104.5 <sup>a</sup> | -99.4  | -114.2  | -100.4 | -94.5  | -117.2  | -99.3  |
| # 1409 Dimethyl naphthalene-2,6-dicarboxylate       | -132.7 <sup>a</sup> | -133.6 | -149.9  | -134.6 | -125.0 | -149.7  | -130.1 |
| # 1412 p-Diacetylbenzene diethyl ketal              | -189.7 <sup>a</sup> | -205.0 | -233.6  | -209.1 | -182.7 | -225.7  | -190.1 |
| # 1431 Tartaric acid                                | -227.5 <sup>a</sup> | -220.1 | -224.6  | -223.1 | -221.0 | -228.1  | -222.7 |
| # 1432 1,3,5,7,9-pentaoxecane                       | -186.4 <sup>a</sup> | -194.2 | -203.5  | -195.8 | -167.6 | -181.3  | -182.0 |
| # 1433 3,5,7,9,11-Pentaoxa-tridecane                | -216.5 <sup>a</sup> | -219.1 | -231.6  | -220.6 | -195.5 | -215.2  | -208.2 |
| # 1434 15-Crown-5                                   | -191.1 <sup>a</sup> | -192.2 | -210.9  | -198.7 | -179.8 | -206.7  | -193.9 |
| # 1447 Trimethyl methanetricarboxylate              | -252.1 <sup>a</sup> | -247.1 | -257.2  | -250.6 | -239.7 | -254.8  | -248.7 |
| # 1448 Triethyl methanetricarboxylate               | -280.4 <sup>a</sup> | -273.4 | -289.0  | -278.7 | -265.2 | -286.6  | -273.7 |
| # 1449 Triethyl 1,1,1-ethanetricarboxylate          | -286.2 <sup>a</sup> | -283.9 | -302.1  | -289.9 | -273.1 | -299.3  | -282.7 |
| # 1466 Tetraethylpyromellitate                      | -353.0 <sup>a</sup> | -338.3 | -365.2  | -346.5 | -324.5 | -364.7  | -338.4 |
| # 1467 Tetrapropyl 1,2,4,5-benzene tetracarboxylate | -370.0 <sup>a</sup> | -360.6 | -395.9  | -367.5 | -344.5 | -394.9  | -360.0 |
| # 1496 Fluoromethane (Geo)                          | -56.8 <sup>a</sup>  | -60.4  | -61.1   | -58.6  | -57.3  | -58.5   | -57.8  |
| # 1498 Fluoroacetylene (Geo)                        | 30.0 <sup>a</sup>   | 26.9   | 26.2    | 26.8   | 23.9   | 22.9    | 24.1   |
| # 1500 Fluoroethylene (Geo)                         | -32.5 <sup>a</sup>  | -32.3  | -33.5   | -31.7  | -32.2  | -34.1   | -32.6  |
| # 1586 Trifluoromethane (Geo)                       | -166.3 <sup>a</sup> | -166.8 | -167.6  | -168.0 | -162.0 | -163.3  | -162.4 |
| # 1494 Fluoromethyl, cation                         | 200.3 <sup>a</sup>  | 193.7  | 193.2   | 191.7  | 199.2  | 198.4   | 198.8  |
| # 1502 CH3CHF, cation                               | 166.0 <sup>a</sup>  | 158.1  | 156.6   | 155.6  | 161.7  | 159.2   | 161.4  |
| # 1503 Fluoroethane                                 | -62.9 <sup>a</sup>  | -67.5  | -69.4   | -66.1  | -65.8  | -68.8   | -65.9  |

... continued on next page ...

Table S71: ... continued from previous page ...

| Species                                     | Ref.                | OM2    | OM2-D3T | ODM2   | OM3    | OM3-D3T | ODM3   |
|---------------------------------------------|---------------------|--------|---------|--------|--------|---------|--------|
| # 1505 2-Fluoropropane                      | -69.4 <sup>a</sup>  | -76.2  | -79.4   | -75.4  | -75.1  | -80.2   | -75.3  |
| # 1506 Fluorobenzene                        | -27.8 <sup>a</sup>  | -27.3  | -32.3   | -26.7  | -28.0  | -35.9   | -27.9  |
| # 1507 Fluorocyclohexane                    | -80.4 <sup>a</sup>  | -78.4  | -86.3   | -78.1  | -78.0  | -90.2   | -79.0  |
| # 1508 1-Fluorononane                       | -101.2 <sup>a</sup> | -99.6  | -111.8  | -99.3  | -99.3  | -117.8  | -100.9 |
| # 1544 Difluoromethyl, cation               | 142.4 <sup>a</sup>  | 136.8  | 136.3   | 135.6  | 141.5  | 140.6   | 144.8  |
| # 1545 Difluoromethane, cation              | 185.2 <sup>a</sup>  | 173.7  | 172.9   | 173.1  | 180.1  | 178.9   | 182.5  |
| # 1546 Difluoromethane                      | -108.1 <sup>a</sup> | -110.9 | -111.6  | -109.4 | -106.6 | -107.8  | -107.1 |
| # 1550 gem-Difluoroethylene                 | -80.5 <sup>a</sup>  | -72.2  | -73.5   | -70.8  | -71.7  | -73.7   | -72.2  |
| # 1551 CH3CF2, cation                       | 107.0 <sup>a</sup>  | 106.6  | 105.1   | 103.1  | 108.4  | 105.9   | 111.2  |
| # 1552 1,1-Difluoroethane                   | -118.8 <sup>a</sup> | -121.8 | -123.6  | -121.5 | -119.4 | -122.4  | -119.8 |
| # 1554 1,2-Difluorobenzene                  | -67.7 <sup>a</sup>  | -69.1  | -74.1   | -68.7  | -69.9  | -77.9   | -70.0  |
| # 1555 1,3-Difluorobenzene                  | -73.9 <sup>a</sup>  | -72.9  | -78.0   | -72.5  | -74.0  | -82.0   | -74.0  |
| # 1556 1,4-Difluorobenzene                  | -73.3 <sup>a</sup>  | -72.6  | -77.6   | -72.2  | -73.5  | -81.5   | -73.8  |
| # 1585 Trifluoromethane, cation             | 151.9 <sup>a</sup>  | 137.2  | 136.4   | 134.4  | 143.8  | 142.2   | 147.4  |
| # 1588 Trifluoroethylene                    | -117.3 <sup>a</sup> | -116.4 | -117.7  | -116.3 | -115.9 | -118.0  | -116.3 |
| # 1589 CF3CH2, cation                       | 114.0 <sup>a</sup>  | 111.1  | 109.5   | 101.3  | 118.7  | 116.1   | 112.4  |
| # 1590 CH2F.CF2, cation                     | 81.0 <sup>a</sup>   | 75.0   | 73.4    | 73.1   | 80.4   | 77.8    | 82.9   |
| # 1591 CF3CH2.                              | -123.6 <sup>a</sup> | -127.3 | -129.0  | -132.1 | -124.3 | -126.9  | -126.7 |
| # 1592 1,1,1-Trifluoroethane                | -178.9 <sup>a</sup> | -178.4 | -180.4  | -181.8 | -176.3 | -179.4  | -176.9 |
| # 1593 (Trifluoromethyl)-benzene            | -138.9 <sup>a</sup> | -145.5 | -152.3  | -147.9 | -141.6 | -152.1  | -142.8 |
| # 1594 Trifluoromethylbenzene               | -143.2 <sup>a</sup> | -145.5 | -152.3  | -147.9 | -141.6 | -152.2  | -142.2 |
| # 1617 1,2,4,5-Tetrafluorobenzene           | -154.6 <sup>a</sup> | -154.5 | -159.7  | -154.6 | -155.9 | -164.1  | -156.2 |
| # 1618 1-Fluoro-3-(trifluoro-methyl)benzene | -189.4 <sup>a</sup> | -190.3 | -197.1  | -193.7 | -186.9 | -197.5  | -188.3 |
| # 1625 Pentafluorobenzene                   | -192.5 <sup>a</sup> | -191.8 | -197.1  | -191.8 | -192.7 | -201.0  | -192.7 |
| # 1626 2,3,4,5,6-Pentafluorotoluene         | -201.6 <sup>a</sup> | -200.9 | -207.7  | -201.3 | -200.6 | -211.3  | -201.1 |
| # 921 Hydrogen isocyanate (Geo)             | -24.3 <sup>a</sup>  | -7.2   | -7.9    | -13.8  | -19.5  | -20.7   | -25.0  |
| # 924 Formamide (Geo)                       | -44.5 <sup>a</sup>  | -39.8  | -41.1   | -43.2  | -46.3  | -48.4   | -48.5  |
| # 1358 Pro-pro (Geo)                        | -131.4 <sup>a</sup> | -126.2 | -143.7  | -129.1 | -124.4 | -149.8  | -132.0 |
| # 1360 Val-val (Geo)                        | -160.6 <sup>a</sup> | -163.6 | -182.6  | -173.1 | -167.4 | -195.0  | -173.8 |
| # 1362 Ile-ile (Geo)                        | -176.5 <sup>a</sup> | -171.8 | -194.8  | -181.7 | -175.4 | -208.6  | -182.4 |
| # 1456 Trinitromethane (Geo)                | -3.2 <sup>a</sup>   | 6.1    | 1.1     | 0.9    | 9.0    | 1.6     | 13.4   |
| # 1473 Pentaerythritol tetranitrate (Geo)   | -92.5 <sup>a</sup>  | -117.4 | -134.2  | -127.3 | -96.9  | -121.6  | -105.5 |
| # 925 Acetaldoxime                          | -5.4 <sup>a</sup>   | -2.7   | -5.1    | -5.5   | -8.4   | -12.2   | -10.2  |
| # 926 Acetamide                             | -57.0 <sup>a</sup>  | -50.7  | -53.2   | -55.6  | -57.4  | -61.4   | -59.1  |
| # 927 Isoxazole                             | 19.6 <sup>a</sup>   | 23.9   | 21.3    | 25.1   | 24.2   | 20.0    | 24.2   |
| # 928 Oxalone                               | -3.7 <sup>a</sup>   | 2.8    | 0.3     | 3.8    | 5.2    | 1.1     | 7.7    |
| # 929 Acrylamine                            | -31.1 <sup>a</sup>  | -24.4  | -27.6   | -29.4  | -29.9  | -35.0   | -31.8  |
| # 930 Methoxyacetonitrile                   | -8.5 <sup>a</sup>   | -10.7  | -13.7   | -10.8  | -10.0  | -14.7   | -11.3  |
| # 931 Dimethylformamide                     | -45.8 <sup>a</sup>  | -43.5  | -47.6   | -39.4  | -41.4  | -47.7   | -45.5  |
| # 932 N-Methyl acetamide                    | -59.3 <sup>a</sup>  | -50.6  | -54.7   | -51.6  | -53.2  | -59.6   | -55.9  |
| # 933 Propanamide                           | -61.9 <sup>a</sup>  | -55.3  | -59.3   | -60.9  | -61.7  | -68.0   | -64.1  |
| # 934 Dimethylaminomethanol                 | -48.6 <sup>a</sup>  | -47.0  | -52.1   | -45.0  | -41.3  | -48.8   | -45.4  |
| # 935 3-Methyl isoxazole                    | 8.5 <sup>a</sup>    | 16.4   | 12.4    | 15.8   | 16.1   | 9.9     | 15.6   |
| # 936 5-Methyl isoxazole                    | 8.1 <sup>a</sup>    | 12.6   | 8.7     | 14.3   | 13.0   | 6.8     | 13.1   |
| # 937 2-Pyrrolidinone                       | -47.2 <sup>a</sup>  | -42.5  | -47.6   | -44.9  | -46.9  | -54.7   | -49.9  |
| # 938 4,5-Dihydro-2-methyl oxazole          | -31.2 <sup>a</sup>  | -25.6  | -30.2   | -27.4  | -23.9  | -31.1   | -25.7  |
| # 939 Methacrylamide                        | -37.7 <sup>a</sup>  | -33.5  | -38.4   | -38.2  | -38.7  | -46.3   | -40.3  |
| # 940 2-Methyl propanamide                  | -67.5 <sup>a</sup>  | -62.8  | -68.7   | -68.1  | -68.3  | -77.2   | -70.3  |
| # 941 Butanamide                            | -66.7 <sup>a</sup>  | -60.1  | -65.7   | -65.9  | -66.7  | -75.2   | -68.7  |
| # 942 Isobutylamide                         | -67.5 <sup>a</sup>  | -62.8  | -68.7   | -68.1  | -68.3  | -77.2   | -70.3  |
| # 944 N,N-Diethyl-hydroxylamine             | -29.1 <sup>a</sup>  | -24.5  | -30.9   | -25.0  | -23.1  | -32.8   | -28.3  |
| # 945 2-Pyridinol                           | -19.0 <sup>a</sup>  | -11.5  | -16.5   | -11.9  | -14.9  | -22.8   | -14.2  |
| # 946 3-Pyridinol                           | -10.4 <sup>a</sup>  | -9.0   | -14.1   | -7.5   | -11.8  | -19.8   | -8.9   |
| # 947 4-Pyridinol                           | -7.2 <sup>a</sup>   | -9.9   | -15.0   | -9.0   | -12.5  | -20.5   | -10.7  |
| # 948 Pyridine 1 oxide                      | 21.0 <sup>a</sup>   | 25.6   | 20.5    | 28.0   | 26.8   | 18.7    | 33.7   |
| # 949 3,5-Dimethyl isoxazole                | -4.3 <sup>a</sup>   | 5.2    | -0.2    | 5.0    | 5.0    | -3.3    | 4.6    |
| # 950 1-Methyl-2-pyrrolidinone              | -50.4 <sup>a</sup>  | -46.2  | -52.8   | -44.7  | -45.8  | -56.0   | -49.8  |
| # 951 2-Ethyl-4,5-dihydro-oxazole           | -35.6 <sup>a</sup>  | -30.6  | -36.8   | -32.5  | -28.6  | -38.1   | -30.9  |
| # 952 N,N-Dimethylamino-2-propen-3-al       | -24.9 <sup>a</sup>  | -20.0  | -26.3   | -15.5  | -17.2  | -26.8   | -19.8  |
| # 953 1-(Dimethylamino)-2-propanone         | -43.0 <sup>a</sup>  | -48.7  | -56.3   | -46.5  | -42.6  | -53.9   | -46.1  |
| # 954 2,2-Dimethyl-propanamide              | -74.8 <sup>a</sup>  | -70.8  | -78.9   | -77.0  | -74.5  | -86.6   | -76.9  |
| # 955 N,N-Dimethyl propanamide              | -59.8 <sup>a</sup>  | -57.8  | -65.2   | -55.2  | -55.0  | -66.1   | -58.7  |
| # 956 2-Hydroxy-6-methylpyridine            | -28.8 <sup>a</sup>  | -19.6  | -26.2   | -22.1  | -23.5  | -33.7   | -23.7  |
| # 957 2-Methyl-3-pyridinol                  | -20.2 <sup>a</sup>  | -16.9  | -23.6   | -16.8  | -20.0  | -30.5   | -17.2  |
| # 958 3-Hydroxy-2-methylpyridine            | -20.2 <sup>a</sup>  | -16.6  | -23.3   | -17.3  | -19.9  | -30.3   | -17.4  |

... continued on next page ...

Table S71: ... continued from previous page ...

| Species                                            | Ref.               | OM2   | OM2-D3T | ODM2  | OM3   | OM3-D3T | ODM3  |
|----------------------------------------------------|--------------------|-------|---------|-------|-------|---------|-------|
| # 959 3-Hydroxy-6-methylpyridine                   | -16.7 <sup>a</sup> | -16.7 | -23.3   | -17.4 | -20.2 | -30.4   | -17.6 |
| # 960 4-Hydroxy-2-methylpyridine                   | -17.1 <sup>a</sup> | -18.1 | -24.7   | -18.8 | -21.2 | -31.4   | -20.2 |
| # 961 6-Methyl-2(1H)-pyridinone                    | -28.8 <sup>a</sup> | -19.8 | -26.5   | -21.4 | -25.3 | -35.7   | -26.2 |
| # 962 m-Amino phenol                               | -23.6 <sup>a</sup> | -16.0 | -22.7   | -20.8 | -20.6 | -31.0   | -20.6 |
| # 963 o-Amino phenol                               | -25.0 <sup>a</sup> | -14.6 | -21.5   | -18.8 | -19.6 | -30.2   | -19.1 |
| # 964 p-Amino phenol                               | -21.6 <sup>a</sup> | -13.9 | -20.6   | -18.8 | -18.6 | -29.0   | -19.0 |
| # 965 Trimethyl isoxazole                          | -4.8 <sup>a</sup>  | -3.4  | -10.6   | -3.1  | -3.1  | -14.1   | -3.6  |
| # 966 Caprolactam                                  | -57.3 <sup>a</sup> | -47.5 | -56.8   | -49.5 | -52.1 | -66.1   | -55.0 |
| # 967 Cyclohexanone oxime                          | -17.9 <sup>a</sup> | -13.3 | -22.1   | -15.6 | -19.8 | -33.0   | -22.0 |
| # 968 N,N-Diethyl acetamide                        | -68.6 <sup>a</sup> | -61.8 | -71.4   | -60.8 | -61.2 | -75.5   | -65.9 |
| # 969 N,N-Dimethylbutylamine                       | -64.7 <sup>a</sup> | -62.7 | -71.5   | -60.3 | -60.0 | -73.3   | -64.0 |
| # 970 Benzoxazole                                  | 10.8 <sup>a</sup>  | 17.1  | 10.5    | 17.1  | 18.4  | 8.1     | 19.8  |
| # 971 Isocyanatobenzene                            | -3.5 <sup>a</sup>  | 17.1  | 10.5    | 14.5  | 7.8   | -2.3    | 2.9   |
| # 972 Benzamide                                    | -24.1 <sup>a</sup> | -20.1 | -27.7   | -24.3 | -25.2 | -36.9   | -26.7 |
| # 973 N,N-Dimethylamino-2,4-pentadiene-5-al        | -6.9 <sup>a</sup>  | -3.1  | -11.5   | 1.1   | 0.1   | -12.7   | -3.1  |
| # 974 2-Methoxy-3,3-dimethylbutanenitrile          | -39.4 <sup>a</sup> | -43.6 | -54.3   | -45.9 | -38.7 | -54.5   | -42.0 |
| # 975 N,N-Diethylaminoacetone                      | -55.8 <sup>a</sup> | -55.7 | -67.3   | -56.3 | -52.5 | -69.7   | -57.3 |
| # 976 N,N-Dimethyl-tert-butylcarboxamide           | -68.4 <sup>a</sup> | -70.0 | -81.8   | -68.0 | -64.0 | -81.5   | -68.6 |
| # 977 alpha-oxo Benzeneacetone nitrile             | 28.1 <sup>a</sup>  | 17.4  | 9.8     | 17.8  | 15.0  | 3.3     | 16.1  |
| # 978 1,3-dimethyl-2-nitroso-benzene               | 33.4 <sup>a</sup>  | 19.7  | 10.1    | 19.9  | 17.3  | 2.7     | 19.0  |
| # 979 N-methyl-N-phenyl formamide                  | -18.1 <sup>a</sup> | -11.6 | -21.0   | -8.4  | -9.8  | -24.2   | -14.0 |
| # 980 Octanone-1-oxime                             | -35.7 <sup>a</sup> | -30.5 | -41.9   | -34.3 | -37.4 | -54.6   | -40.4 |
| # 981 Octanone-2-oxime                             | -43.2 <sup>a</sup> | -33.6 | -45.3   | -36.5 | -40.1 | -57.7   | -42.8 |
| # 982 Octanone-3-oxime                             | -41.3 <sup>a</sup> | -34.0 | -46.1   | -37.0 | -39.9 | -57.9   | -42.4 |
| # 983 Octanone-4-oxime                             | -43.3 <sup>a</sup> | -34.1 | -46.3   | -37.1 | -39.9 | -57.9   | -42.4 |
| # 984 2(1H)-Quinolinone                            | -6.1 <sup>a</sup>  | 0.1   | -9.6    | -1.5  | -3.5  | -18.4   | -5.5  |
| # 985 3-Phenyl isoxazole                           | 33.3 <sup>a</sup>  | 47.0  | 37.9    | 46.9  | 48.0  | 33.8    | 46.6  |
| # 986 4-Quinololinol                               | 5.0 <sup>a</sup>   | 7.1   | -2.5    | 7.2   | 5.7   | -9.2    | 7.0   |
| # 987 5-Phenyl isoxazole                           | 38.3 <sup>a</sup>  | 42.5  | 33.5    | 44.4  | 44.1  | 30.1    | 44.1  |
| # 988 8-Quinololinol                               | 1.6 <sup>a</sup>   | 5.8   | -3.8    | 6.1   | 3.3   | -11.5   | 5.4   |
| # 989 a-Cyanoacetophenone                          | 16.8 <sup>a</sup>  | 10.5  | 1.3     | 10.9  | 7.7   | -6.3    | 7.9   |
| # 990 2,4,6-Trimethylnitrosobenzene                | 25.7 <sup>a</sup>  | 9.7   | -1.6    | 9.2   | 7.7   | -9.3    | 9.4   |
| # 991 N,N-Dimethyl benzamide                       | -20.6 <sup>a</sup> | -21.9 | -33.1   | -18.9 | -18.2 | -35.1   | -22.4 |
| # 992 N,N-Dimethylamino-2,4,6-heptatriene-7-al     | 5.2 <sup>a</sup>   | 12.7  | 2.3     | 16.6  | 16.2  | 0.4     | 12.4  |
| # 993 2,2,6,6-Tetramethyl-4-piperidinone           | -65.4 <sup>a</sup> | -64.7 | -80.5   | -70.0 | -64.2 | -87.4   | -67.9 |
| # 994 2-Methyl-4-hydroxyquinoline                  | -5.6 <sup>a</sup>  | -1.2  | -12.4   | -3.3  | -3.0  | -20.1   | -2.0  |
| # 995 2-Methyl-8-quinolinol                        | -9.4 <sup>a</sup>  | -2.5  | -13.7   | -3.8  | -5.3  | -22.5   | -3.6  |
| # 996 3-Methyl-5-phenyl isoxazole                  | 24.5 <sup>a</sup>  | 35.0  | 24.6    | 35.1  | 36.1  | 19.9    | 35.5  |
| # 997 4-Methyl-2-hydroxyquinoline                  | -14.6 <sup>a</sup> | -3.6  | -15.0   | -5.3  | -5.0  | -22.4   | -5.5  |
| # 998 5-Methyl-3-phenyl isoxazole                  | 23.6 <sup>a</sup>  | 35.7  | 25.2    | 36.6  | 36.7  | 20.5    | 36.1  |
| # 999 beta-Cyanopropiophenone                      | 7.2 <sup>a</sup>   | 1.6   | -9.1    | 1.6   | -0.5  | -16.8   | -0.6  |
| # 1000 2,4,6-Trimethylbenzimidazole, N-oxide       | 32.7 <sup>a</sup>  | 35.9  | 24.0    | 31.1  | 30.2  | 12.3    | 30.3  |
| # 1001 2-(Dimethylamino)-acetophenone              | -11.1 <sup>a</sup> | -18.4 | -31.7   | -16.0 | -10.4 | -30.1   | -14.5 |
| # 1002 N,N,4-Trimethyl benzamide                   | -26.9 <sup>a</sup> | -31.4 | -44.2   | -28.6 | -27.3 | -46.6   | -31.6 |
| # 1003 (E)-3-(Methylamino)-1-phenyl-but-2-enone    | -12.8 <sup>a</sup> | -9.6  | -23.0   | -9.4  | -9.2  | -29.4   | -9.8  |
| # 1004 1-Propanone, 2-(dimethylamino)-1-phenyl-    | -16.7 <sup>a</sup> | -23.9 | -39.4   | -21.3 | -16.0 | -38.8   | -20.2 |
| # 1005 2-Propanamine, 2-methyl-N-(phenylmethyl)-   | 7.4 <sup>a</sup>   | 8.8   | -6.2    | 9.1   | 12.8  | -9.6    | 14.8  |
| # 1006 1-Adamantanecarboxamide                     | -76.2 <sup>a</sup> | -67.6 | -86.5   | -74.9 | -72.1 | -100.1  | -77.2 |
| # 1007 N,N-Dimethylnonamide                        | -89.4 <sup>a</sup> | -85.4 | -101.9  | -84.1 | -84.1 | -108.7  | -89.3 |
| # 1008 Phenoxazine                                 | 22.5 <sup>a</sup>  | 32.0  | 18.9    | 29.6  | 33.7  | 13.8    | 30.4  |
| # 1009 2-(Diethylamino)-1-phenylethanone           | -23.0 <sup>a</sup> | -25.1 | -42.9   | -25.9 | -19.0 | -44.7   | -24.8 |
| # 1010 9,10-Dihydro-9-oxoacridine                  | 8.3 <sup>a</sup>   | 11.6  | -2.8    | 10.9  | 11.4  | -10.5   | 11.0  |
| # 1011 Benzenamine, N-(phenylmethylene)-, N-oxide  | 62.9 <sup>a</sup>  | 63.4  | 47.8    | 64.2  | 65.8  | 42.6    | 69.1  |
| # 1012 1-Propanone, 2-(diethylamino)-1-phenyl-     | -29.7 <sup>a</sup> | -30.3 | -50.3   | -31.3 | -25.1 | -54.1   | -31.1 |
| # 1013 N,N-Dimethyl-1-adamantylcarboxamide         | -68.4 <sup>a</sup> | -69.3 | -91.9   | -69.4 | -64.5 | -97.7   | -72.0 |
| # 1014 4-Isopropylbenzylidene t-butylamine N-oxide | -12.2 <sup>a</sup> | -11.5 | -31.9   | -12.0 | -6.2  | -36.4   | -5.1  |
| # 1017 Urea                                        | -58.7 <sup>a</sup> | -39.9 | -42.1   | -50.6 | -49.3 | -52.8   | -54.2 |
| # 1018 N-Methyl urea                               | -56.3 <sup>a</sup> | -40.9 | -44.5   | -47.5 | -46.3 | -51.8   | -51.7 |
| # 1019 Dimethyl furazan                            | 25.6 <sup>a</sup>  | 33.2  | 27.9    | 33.4  | 31.5  | 23.4    | 30.6  |
| # 1020 Isopropylurea                               | -69.3 <sup>a</sup> | -52.8 | -59.6   | -61.2 | -59.5 | -69.7   | -65.5 |
| # 1021 5-Amino-3,4-dimethylisoxazole               | 1.2 <sup>a</sup>   | 13.7  | 6.9     | 9.5   | 10.9  | 0.6     | 8.8   |
| # 1022 (1-Methylpropyl) urea                       | -73.4 <sup>a</sup> | -57.3 | -66.1   | -66.2 | -64.1 | -77.1   | -70.6 |
| # 1023 N,N-diethylurea                             | -65.1 <sup>a</sup> | -51.6 | -60.8   | -56.1 | -54.0 | -67.5   | -61.3 |
| # 1024 Tetramethylurea                             | -49.1 <sup>a</sup> | -42.5 | -51.4   | -37.9 | -33.5 | -46.7   | -42.1 |
| # 1027 4-Amino-2(1H)-pyrimidinone                  | -14.2 <sup>a</sup> | 9.5   | 3.8     | 2.3   | 2.9   | -5.9    | -0.7  |

... continued on next page ...

Table S71: ... continued from previous page ...

| Species                                               | Ref.                | OM2    | OM2-D3T | ODM2   | OM3    | OM3-D3T | ODM3   |
|-------------------------------------------------------|---------------------|--------|---------|--------|--------|---------|--------|
| # 1213 Methyl nitrite                                 | -15.8 <sup>a</sup>  | -16.8  | -18.4   | -17.4  | -20.0  | -22.6   | -20.3  |
| # 1214 Nitromethane                                   | -17.9 <sup>a</sup>  | -17.3  | -19.1   | -17.0  | -15.7  | -18.5   | -12.9  |
| # 1215 Ethyl nitrite                                  | -25.9 <sup>a</sup>  | -24.9  | -27.9   | -25.8  | -28.1  | -32.8   | -28.3  |
| # 1216 Glycine                                        | -93.7 <sup>a</sup>  | -90.8  | -93.9   | -93.3  | -94.1  | -99.0   | -94.2  |
| # 1217 Methyl carbamate                               | -101.6 <sup>a</sup> | -85.9  | -88.9   | -92.0  | -88.7  | -93.3   | -93.3  |
| # 1218 Nitroethane                                    | -23.5 <sup>a</sup>  | -23.4  | -26.6   | -23.8  | -22.1  | -26.8   | -19.8  |
| # 1219 Alanine                                        | -99.1 <sup>a</sup>  | -98.4  | -103.2  | -102.2 | -101.2 | -108.5  | -101.4 |
| # 1220 beta-Alanine                                   | -101.0 <sup>a</sup> | -94.1  | -98.6   | -98.6  | -97.7  | -104.7  | -99.1  |
| # 1221 Isopropyl nitrite                              | -31.9 <sup>a</sup>  | -35.0  | -39.5   | -35.5  | -37.4  | -44.3   | -37.6  |
| # 1222 N-Methylglycine                                | -87.8 <sup>a</sup>  | -89.6  | -94.1   | -90.8  | -88.4  | -95.3   | -90.7  |
| # 1223 Propyl nitrite                                 | -28.4 <sup>a</sup>  | -30.3  | -34.7   | -30.4  | -33.1  | -39.7   | -33.1  |
| # 1224 Urethane                                       | -106.7 <sup>a</sup> | -94.2  | -98.4   | -99.8  | -97.0  | -103.6  | -101.3 |
| # 1225 Methyl cyanoacetate                            | -58.2 <sup>a</sup>  | -57.7  | -62.0   | -58.5  | -57.8  | -64.4   | -60.4  |
| # 1226 Succinimide                                    | -89.8 <sup>a</sup>  | -79.7  | -84.6   | -83.5  | -88.3  | -95.9   | -93.3  |
| # 1227 2-Nitrobutane                                  | -39.1 <sup>a</sup>  | -36.2  | -42.9   | -38.0  | -34.8  | -44.9   | -33.7  |
| # 1228 2-Nitroisobutane                               | -42.2 <sup>a</sup>  | -39.8  | -46.7   | -42.2  | -37.8  | -48.2   | -37.3  |
| # 1229 4-Aminobutanoic acid                           | -105.0 <sup>a</sup> | -98.8  | -104.9  | -103.4 | -102.6 | -111.9  | -104.1 |
| # 1230 Isobutyl nitrite                               | -36.1 <sup>a</sup>  | -36.8  | -43.0   | -37.3  | -38.9  | -48.2   | -39.4  |
| # 1231 n-Butyl nitrite                                | -34.8 <sup>a</sup>  | -34.2  | -40.1   | -35.4  | -37.6  | -46.6   | -38.0  |
| # 1232 Sec-butyl nitrite                              | -36.5 <sup>a</sup>  | -39.8  | -46.0   | -40.4  | -41.9  | -51.3   | -42.2  |
| # 1233 t-Butyl nitrite                                | -41.0 <sup>a</sup>  | -45.6  | -52.1   | -46.6  | -46.6  | -56.5   | -47.1  |
| # 1234 Diethanolamine                                 | -94.9 <sup>a</sup>  | -86.5  | -93.2   | -91.2  | -86.7  | -96.8   | -89.8  |
| # 1235 N-Methylmaleimide                              | -61.2 <sup>a</sup>  | -44.4  | -50.0   | -44.7  | -46.5  | -55.2   | -53.8  |
| # 1236 Glutarimide                                    | -94.1 <sup>a</sup>  | -87.4  | -94.2   | -90.6  | -94.8  | -105.2  | -99.6  |
| # 1237 N-Methylsuccinimide                            | -93.1 <sup>a</sup>  | -82.8  | -89.3   | -83.1  | -86.3  | -96.2   | -92.7  |
| # 1238 Proline                                        | -87.5 <sup>a</sup>  | -87.9  | -95.3   | -90.6  | -88.9  | -100.8  | -90.7  |
| # 1239 5-Aminovaleric acid                            | -110.0 <sup>a</sup> | -103.5 | -111.1  | -108.3 | -107.6 | -119.1  | -109.4 |
| # 1240 N,N-Dimethylglycine methyl ester               | -88.5 <sup>a</sup>  | -86.7  | -94.4   | -84.8  | -77.2  | -88.6   | -82.5  |
| # 1241 tert-Pentyl nitrite                            | -45.8 <sup>a</sup>  | -49.6  | -58.1   | -50.7  | -50.1  | -62.8   | -50.7  |
| # 1242 Valine                                         | -108.2 <sup>a</sup> | -109.5 | -118.1  | -114.1 | -111.4 | -124.2  | -112.6 |
| # 1243 1,1-Dimethoxy-trimethylamine                   | -85.0 <sup>a</sup>  | -85.9  | -94.6   | -83.9  | -71.6  | -84.4   | -80.0  |
| # 1244 Niacin                                         | -52.9 <sup>a</sup>  | -57.7  | -64.2   | -56.1  | -58.9  | -69.0   | -57.6  |
| # 1245 Nitrobenzene                                   | 15.4 <sup>a</sup>   | 13.0   | 6.4     | 12.1   | 14.3   | 4.1     | 18.0   |
| # 1247 Ethyl 2-cyanopropionate                        | -74.6 <sup>a</sup>  | -74.7  | -82.3   | -76.0  | -73.6  | -85.0   | -76.1  |
| # 1248 Ethyl N,N-dimethylglycinate                    | -97.3 <sup>a</sup>  | -94.9  | -104.1  | -93.4  | -85.3  | -99.0   | -90.8  |
| # 1249 Hexanoic acid, 6-amino-                        | -115.3 <sup>a</sup> | -108.1 | -117.3  | -111.8 | -113.2 | -127.0  | -115.3 |
| # 1250 Isoleucine                                     | -110.0 <sup>a</sup> | -110.7 | -121.3  | -116.3 | -113.1 | -128.8  | -115.6 |
| # 1251 Leucine                                        | -113.1 <sup>a</sup> | -113.5 | -123.6  | -118.1 | -115.8 | -130.8  | -117.2 |
| # 1252 Methyl N,N-dimethylalaninate                   | -94.3 <sup>a</sup>  | -93.7  | -103.5  | -91.6  | -84.3  | -98.4   | -89.1  |
| # 1253 N,N-Dimethylacetamide dimethyl acetal          | -92.5 <sup>a</sup>  | -94.3  | -105.5  | -94.3  | -79.3  | -95.6   | -88.0  |
| # 1254 m-Aminobenzoic acid                            | -69.2 <sup>a</sup>  | -64.6  | -72.8   | -68.9  | -67.1  | -79.6   | -68.0  |
| # 1255 o-Aminobenzoic acid                            | -70.8 <sup>a</sup>  | -67.3  | -75.7   | -72.0  | -70.0  | -82.8   | -70.4  |
| # 1256 p-Aminobenzoic acid                            | -70.2 <sup>a</sup>  | -66.5  | -74.6   | -70.9  | -69.3  | -81.9   | -70.1  |
| # 1257 p-Nitrotoluene                                 | 7.4 <sup>a</sup>    | 2.9    | -5.2    | 1.4    | 4.6    | -8.0    | 7.8    |
| # 1258 Phenyl nitromethane                            | 7.3 <sup>a</sup>    | 8.2    | -0.2    | 7.9    | 9.7    | -3.0    | 11.3   |
| # 1260 Methyl N,N-,a,a-tetramethylglycinate           | -108.1 <sup>a</sup> | -99.8  | -112.2  | -98.8  | -89.4  | -107.4  | -95.0  |
| # 1261 2,6-Dimethylnitrobenzene                       | 2.1 <sup>a</sup>    | -4.3   | -14.7   | -5.4   | -1.0   | -16.8   | 2.1    |
| # 1262 2-Amino-2-phenylacetic acid                    | -67.0 <sup>a</sup>  | -65.8  | -76.0   | -69.9  | -68.1  | -83.6   | -69.6  |
| # 1263 2-Nitro-m-xylene                               | 2.1 <sup>a</sup>    | -4.3   | -14.7   | -5.4   | -1.0   | -16.8   | 2.1    |
| # 1264 N-Phenylglycine                                | -64.2 <sup>a</sup>  | -60.0  | -69.9   | -60.5  | -60.7  | -75.5   | -62.2  |
| # 1265 8-Aminocaprylic acid                           | -125.0 <sup>a</sup> | -117.3 | -129.5  | -122.7 | -122.1 | -140.4  | -124.6 |
| # 1266 2-Methyl-1H-isoindole-1,3(2H)-dione            | -55.9 <sup>a</sup>  | -43.4  | -53.4   | -43.2  | -44.9  | -60.3   | -51.6  |
| # 1267 Nitromesitylene                                | -6.4 <sup>a</sup>   | -14.2  | -26.3   | -16.0  | -10.5  | -28.8   | -8.0   |
| # 1268 Phenylalanine                                  | -69.3 <sup>a</sup>  | -71.0  | -83.1   | -75.7  | -73.7  | -91.7   | -75.8  |
| # 1269 2,2,6,6-Tetramethyl-4-oxo-1-piperidinyloxy     | -51.5 <sup>a</sup>  | -64.7  | -80.8   | -67.6  | -60.5  | -84.1   | -65.5  |
| # 1270 1-Hydroxy-2,2,6,6-tetramethyl-4-piperidinone   | -71.2 <sup>a</sup>  | -75.1  | -92.1   | -80.6  | -70.8  | -95.6   | -79.8  |
| # 1271 4-Hydroxy-2,2,6,6-tetramethyl-1-piperidinyloxy | -69.6 <sup>a</sup>  | -74.3  | -91.3   | -78.2  | -69.0  | -93.8   | -74.6  |
| # 1272 1-Hydroxy-2,2,6,6-tetramethyl-4-piperidinol    | -82.5 <sup>a</sup>  | -83.7  | -101.5  | -90.0  | -78.3  | -104.3  | -87.9  |
| # 1273 1-Nitroso-2-naphthalenol                       | 8.6 <sup>a</sup>    | 6.8    | -4.6    | 6.0    | 5.2    | -12.4   | 8.2    |
| # 1274 1-Nitroso-4-naphthalenol                       | 17.8 <sup>a</sup>   | 11.0   | -0.3    | 10.4   | 7.5    | -9.8    | 9.8    |
| # 1275 2-Nitroso-1-naphthalenol                       | 8.9 <sup>a</sup>    | 6.6    | -4.8    | 6.0    | 4.8    | -12.6   | 8.1    |
| # 1276 N,N-Dimethyl 4-methoxybenzamide                | -53.7 <sup>a</sup>  | -57.0  | -70.3   | -55.3  | -51.0  | -70.9   | -56.8  |
| # 1277 1-Nitroadamantane                              | -45.7 <sup>a</sup>  | -40.0  | -57.5   | -44.3  | -37.1  | -63.2   | -39.1  |
| # 1278 2-Nitroadamantane                              | -43.0 <sup>a</sup>  | -36.6  | -54.3   | -39.6  | -34.3  | -60.5   | -35.7  |
| # 1279 Phenol, 2-[(phenylimino)methyl]-, N-oxide      | 12.9 <sup>a</sup>   | 14.5   | -0.8    | 13.4   | 13.7   | -9.4    | 13.4   |

... continued on next page ...



Table S71: ... continued from previous page ...

| Species                                                   | Ref.                | OM2    | OM2-D3T | ODM2   | OM3    | OM3-D3T | ODM3   |
|-----------------------------------------------------------|---------------------|--------|---------|--------|--------|---------|--------|
| # 1280 Benzenamine, N-[(4-methoxyphenyl)methyl]-, N-oxide | 26.2 <sup>a</sup>   | 25.1   | 8.7     | 25.7   | 30.9   | 6.0     | 33.4   |
| # 1281 N-(3-Phenoxy-2-hydroxypropyl)aniline               | -44.1 <sup>a</sup>  | -28.7  | -47.1   | -33.1  | -26.1  | -54.3   | -30.2  |
| # 1283 Oxalamide                                          | -92.5 <sup>a</sup>  | -80.4  | -83.9   | -88.7  | -92.8  | -98.1   | -94.8  |
| # 1285 N-Nitrodimethylamine                               | -3.2 <sup>a</sup>   | -7.1   | -11.4   | -4.4   | 1.5    | -5.1    | 1.7    |
| # 1286 Acetyl-urea                                        | -105.6 <sup>a</sup> | -84.7  | -89.7   | -93.7  | -94.6  | -102.3  | -102.0 |
| # 1287 Propanediamide                                     | -99.5 <sup>a</sup>  | -87.6  | -92.7   | -97.2  | -99.9  | -107.7  | -103.2 |
| # 1288 Pyrazine-1,4-dioxide                               | 36.3 <sup>a</sup>   | 37.4   | 32.1    | 41.0   | 40.9   | 32.7    | 53.7   |
| # 1289 Uracil                                             | -72.4 <sup>a</sup>  | -52.5  | -57.8   | -57.1  | -61.2  | -69.4   | -68.2  |
| # 1290 Thymine                                            | -78.6 <sup>a</sup>  | -62.1  | -69.0   | -67.3  | -69.8  | -80.4   | -76.9  |
| # 1291 m-Nitroaniline                                     | 14.9 <sup>a</sup>   | 19.3   | 11.5    | 14.3   | 17.9   | 5.9     | 20.8   |
| # 1292 p-Nitroaniline                                     | 13.2 <sup>a</sup>   | 16.5   | 8.7     | 11.5   | 14.8   | 2.9     | 18.7   |
| # 1293 Lysine                                             | -102.5 <sup>a</sup> | -100.1 | -111.0  | -107.2 | -106.4 | -122.5  | -108.2 |
| # 1294 Isophthalamide                                     | -70.3 <sup>a</sup>  | -59.2  | -69.5   | -68.3  | -69.2  | -84.9   | -72.5  |
| # 1295 Teraphthalamide                                    | -69.7 <sup>a</sup>  | -58.6  | -68.9   | -67.8  | -68.7  | -84.4   | -72.1  |
| # 1296 N,N-Dimethyl-m-nitroaniline                        | 17.4 <sup>a</sup>   | 18.5   | 7.1     | 19.9   | 25.4   | 8.2     | 26.3   |
| # 1297 N,N-Dimethyl-p-nitroaniline                        | 16.1 <sup>a</sup>   | 16.1   | 4.8     | 18.9   | 22.7   | 5.5     | 24.6   |
| # 1298 Tryptophan                                         | -51.6 <sup>a</sup>  | -41.1  | -56.8   | -46.9  | -44.8  | -68.0   | -47.6  |
| # 1300 Imidodicarbonic diamide                            | -104.4 <sup>a</sup> | -78.0  | -82.6   | -92.0  | -90.9  | -97.9   | -100.4 |
| # 1301 Histidine                                          | -63.5 <sup>a</sup>  | -48.6  | -58.5   | -52.3  | -52.5  | -67.3   | -51.8  |
| # 1302 Arginine                                           | -84.3 <sup>a</sup>  | -59.2  | -71.5   | -75.9  | -70.1  | -88.3   | -79.5  |
| # 1340 Methyl nitrate                                     | -29.1 <sup>a</sup>  | -32.7  | -34.9   | -34.9  | -28.4  | -31.8   | -29.8  |
| # 1341 Oxamic acid                                        | -132.0 <sup>a</sup> | -122.2 | -125.1  | -127.0 | -129.6 | -133.5  | -131.1 |
| # 1342 Ethyl nitrate                                      | -36.8 <sup>a</sup>  | -41.6  | -45.1   | -43.0  | -36.6  | -42.0   | -37.8  |
| # 1343 Serine                                             | -133.5 <sup>a</sup> | -131.3 | -136.8  | -137.4 | -135.2 | -143.4  | -136.8 |
| # 1344 2-Nitrofuran                                       | -6.9 <sup>a</sup>   | -3.0   | -7.2    | -4.4   | -0.8   | -7.5    | 3.9    |
| # 1345 Threonine                                          | -140.5 <sup>a</sup> | -140.6 | -147.9  | -146.0 | -143.5 | -154.5  | -145.1 |
| # 1346 m-Nitrophenol                                      | -25.2 <sup>a</sup>  | -25.9  | -33.1   | -28.5  | -26.4  | -37.5   | -22.9  |
| # 1347 o-Nitrophenol                                      | -30.8 <sup>a</sup>  | -30.4  | -37.7   | -32.8  | -29.6  | -41.0   | -25.5  |
| # 1348 p-Nitrophenol                                      | -27.4 <sup>a</sup>  | -28.4  | -35.5   | -30.8  | -28.4  | -39.5   | -24.4  |
| # 1349 Tyrosine                                           | -111.6 <sup>a</sup> | -111.0 | -123.6  | -117.5 | -115.4 | -134.3  | -117.6 |
| # 1352 Barbituric acid                                    | -121.8 <sup>a</sup> | -107.7 | -113.7  | -114.3 | -119.8 | -128.9  | -130.2 |
| # 1353 Asparagine                                         | -137.8 <sup>a</sup> | -132.0 | -139.4  | -141.7 | -141.1 | -152.4  | -144.2 |
| # 1354 GLY-GLY                                            | -136.4 <sup>a</sup> | -125.8 | -132.8  | -130.3 | -132.6 | -143.1  | -135.6 |
| # 1355 Glutamine                                          | -142.4 <sup>a</sup> | -135.9 | -145.0  | -146.1 | -145.4 | -159.0  | -149.3 |
| # 1356 ALA-ALA                                            | -152.4 <sup>a</sup> | -141.2 | -151.8  | -149.8 | -147.2 | -163.1  | -151.2 |
| # 1357 8-Hydroxy-5-nitroquinoline                         | -0.4 <sup>a</sup>   | -0.7   | -12.3   | -2.0   | -0.4   | -18.1   | 5.5    |
| # 1364 LEU-LEU                                            | -177.1 <sup>a</sup> | -171.4 | -193.1  | -182.2 | -176.3 | -208.0  | -183.1 |
| # 1366 1,3,5-Triazine-2,4,6(1H,3H,5H)-trione              | -134.8 <sup>a</sup> | -99.4  | -104.9  | -110.2 | -113.0 | -121.4  | -129.3 |
| # 1367 1,3,5-Trimethyl-s-triazine-2,4,6-trione            | -141.1 <sup>a</sup> | -108.9 | -119.5  | -110.0 | -105.2 | -121.2  | -126.6 |
| # 1368 2,4,6-Trimethoxy-s-triazine                        | -70.1 <sup>a</sup>  | -43.6  | -52.9   | -53.3  | -41.2  | -55.3   | -55.1  |
| # 1413 Aspartic acid                                      | -185.9 <sup>a</sup> | -181.3 | -188.2  | -187.0 | -185.3 | -195.7  | -187.4 |
| # 1414 Glutamic acid                                      | -189.7 <sup>a</sup> | -188.2 | -196.8  | -193.7 | -191.9 | -204.7  | -193.8 |
| # 1415 4-Nitrocatechol                                    | -69.3 <sup>a</sup>  | -66.9  | -74.7   | -70.9  | -68.9  | -80.9   | -64.6  |
| # 1416 p-Nitrobenzoic acid                                | -68.7 <sup>a</sup>  | -74.4  | -83.0   | -76.4  | -73.0  | -86.2   | -70.2  |
| # 1419 Dinitromethane                                     | -13.3 <sup>a</sup>  | -7.9   | -11.1   | -9.7   | -5.4   | -10.3   | -1.5   |
| # 1420 m-Dinitrobenzene                                   | 11.3 <sup>a</sup>   | 11.4   | 3.2     | 8.7    | 14.2   | 1.6     | 21.0   |
| # 1421 o-Dinitrobenzene                                   | 20.2 <sup>a</sup>   | 11.4   | 3.2     | 8.7    | 14.2   | 1.6     | 21.0   |
| # 1422 p-Dinitrobenzene                                   | 13.3 <sup>a</sup>   | 11.4   | 3.2     | 8.6    | 14.2   | 1.5     | 20.8   |
| # 1423 2,4-Dinitrotoluene                                 | 7.9 <sup>a</sup>    | 1.6    | -8.5    | -1.2   | 5.4    | -10.0   | 12.3   |
| # 1424 Dinitrophenylmethane                               | 8.3 <sup>a</sup>    | 14.5   | 4.1     | 11.6   | 18.0   | 2.3     | 19.5   |
| # 1425 N,N'-Bis(m-methoxyphenyl) terephthalamide          | -81.3 <sup>a</sup>  | -68.5  | -96.4   | -74.8  | -67.4  | -109.3  | -76.2  |
| # 1426 N,N'-Bis(o-methoxyphenyl) terephthalamide          | -74.2 <sup>a</sup>  | -70.3  | -99.0   | -77.2  | -68.1  | -110.7  | -77.2  |
| # 1427 N,N'-Bis(p-methoxyphenyl) terephthalamide          | -76.6 <sup>a</sup>  | -66.8  | -94.8   | -73.2  | -65.7  | -107.6  | -74.7  |
| # 1428 Methyl dinitramine                                 | 10.3 <sup>a</sup>   | 13.5   | 9.2     | 12.6   | 21.6   | 15.0    | 21.2   |
| # 1438 SER-SER                                            | -211.6 <sup>a</sup> | -214.2 | -226.3  | -226.7 | -220.9 | -238.9  | -226.1 |
| # 1439 THR-THR                                            | -230.2 <sup>a</sup> | -232.7 | -249.4  | -246.1 | -236.7 | -260.9  | -243.0 |
| # 1458 1,1,1-Trinitroethane                               | -12.4 <sup>a</sup>  | -6.9   | -13.9   | -13.9  | -4.2   | -14.6   | -1.0   |
| # 1459 2,4,6-Trinitrotoluene                              | 12.9 <sup>a</sup>   | 4.9    | -7.1    | 0.2    | 10.9   | -7.4    | 20.8   |
| # 1460 2-(Diacetoxymethyl)-5-nitrofuran                   | -184.4 <sup>a</sup> | -186.4 | -199.1  | -188.6 | -175.3 | -194.2  | -177.1 |
| # 1461 ASP-ASP                                            | -269.0 <sup>a</sup> | -256.5 | -272.4  | -266.5 | -265.3 | -288.4  | -275.5 |
| # 1462 2,4,6-Trinitroanisole                              | -5.8 <sup>a</sup>   | -16.3  | -28.9   | -22.3  | -6.8   | -25.7   | 1.7    |
| # 1463 2,4,6-Trinitrophenetole                            | -20.1 <sup>a</sup>  | -25.7  | -40.5   | -33.3  | -16.7  | -38.7   | -9.4   |
| # 1471 Glycerol trinitrate                                | -64.7 <sup>a</sup>  | -84.9  | -94.8   | -92.6  | -72.0  | -86.5   | -77.3  |
| # 1475 Bis(2,2,2-trinitroethyl)-amine                     | 11.3 <sup>a</sup>   | 15.2   | -4.6    | -3.1   | 22.9   | -5.7    | 24.8   |

a Taken from the experimental and high-level ab initio data quoted in: [http://openmopac.net/PM7\\_accuracy/molecules.html](http://openmopac.net/PM7_accuracy/molecules.html)

; J.J.P.Stewart, J.Mol.Model. 19, 1 (2013).

Table S72: Benchmark Results for the PM7-CHNOF Set. Ionization Potentials (eV)

| Species                                          | Ref.               | OM2   | OM2-D3T | ODM2  | OM3   | OM3-D3T | ODM3  |
|--------------------------------------------------|--------------------|-------|---------|-------|-------|---------|-------|
| # 3 Hydrogen (Geo)                               | 15.40 <sup>a</sup> | 15.68 | 15.68   | 15.64 | 15.65 | 15.65   | 15.67 |
| # 588 Nitrogen (Geo)                             | 15.60 <sup>a</sup> | 15.46 | 15.46   | 15.55 | 14.51 | 14.51   | 14.73 |
| # 54 Methane (Geo)                               | 13.60 <sup>a</sup> | 13.64 | 13.64   | 13.66 | 14.17 | 14.17   | 14.30 |
| # 60 Acetylene (Geo)                             | 11.40 <sup>a</sup> | 11.55 | 11.55   | 11.35 | 11.79 | 11.79   | 11.64 |
| # 64 Ethylene (Geo)                              | 10.50 <sup>a</sup> | 10.74 | 10.74   | 10.53 | 11.05 | 11.05   | 10.87 |
| # 69 Ethane (Geo)                                | 12.00 <sup>a</sup> | 11.92 | 11.92   | 11.93 | 12.30 | 12.30   | 12.43 |
| # 84 Allene (Geo)                                | 10.10 <sup>a</sup> | 10.16 | 10.16   | 9.97  | 10.44 | 10.45   | 10.31 |
| # 85 Cyclopropene (Geo)                          | 9.90 <sup>a</sup>  | 9.84  | 9.84    | 9.70  | 10.13 | 10.13   | 10.06 |
| # 88 Propyne (Geo)                               | 10.40 <sup>a</sup> | 10.64 | 10.64   | 10.47 | 10.88 | 10.88   | 10.78 |
| # 93 Cyclopropane (Geo)                          | 11.00 <sup>a</sup> | 10.88 | 10.88   | 10.71 | 11.47 | 11.47   | 11.38 |
| # 96 Propene (Geo)                               | 9.90 <sup>a</sup>  | 9.99  | 9.99    | 9.81  | 10.28 | 10.29   | 10.16 |
| # 99 Propane (Geo)                               | 11.50 <sup>a</sup> | 11.39 | 11.39   | 11.36 | 11.69 | 11.69   | 11.82 |
| # 105 Diacetylene (Geo)                          | 10.20 <sup>a</sup> | 10.30 | 10.30   | 10.06 | 10.47 | 10.47   | 10.29 |
| # 107 CH <sub>2</sub> =C=C=CH <sub>2</sub> (Geo) | 9.10 <sup>a</sup>  | 9.35  | 9.35    | 9.11  | 9.60  | 9.60    | 9.39  |
| # 117 2-Butyne (Geo)                             | 9.60 <sup>a</sup>  | 9.91  | 9.91    | 9.76  | 10.14 | 10.14   | 10.07 |
| # 121 1,3-Butadiene (Geo)                        | 9.10 <sup>a</sup>  | 9.32  | 9.32    | 9.10  | 9.61  | 9.61    | 9.43  |
| # 125 1-Butene (Geo)                             | 9.70 <sup>a</sup>  | 9.93  | 9.93    | 9.74  | 10.26 | 10.26   | 10.13 |
| # 127 Cyclobutane (Geo)                          | 10.70 <sup>a</sup> | 10.38 | 10.38   | 10.24 | 10.98 | 10.98   | 10.97 |
| # 135 n-Butane (Geo)                             | 11.20 <sup>a</sup> | 10.95 | 10.94   | 10.82 | 11.47 | 11.47   | 11.53 |
| # 136 Isobutane (Geo)                            | 11.40 <sup>a</sup> | 11.06 | 11.07   | 10.96 | 11.41 | 11.41   | 11.53 |
| # 146 Cyclopentadiene (Geo)                      | 8.60 <sup>a</sup>  | 8.82  | 8.82    | 8.63  | 9.10  | 9.10    | 8.97  |
| # 167 Neopentane (Geo)                           | 11.30 <sup>a</sup> | 10.82 | 10.82   | 10.70 | 11.31 | 11.31   | 11.31 |
| # 173 Benzene (Geo)                              | 9.20 <sup>a</sup>  | 9.59  | 9.59    | 9.41  | 9.91  | 9.91    | 9.76  |
| # 186 Cyclohexene (Geo)                          | 10.30 <sup>a</sup> | 9.29  | 9.29    | 9.14  | 9.59  | 9.59    | 9.51  |
| # 194 Cyclohexane (Geo)                          | 10.30 <sup>a</sup> | 10.16 | 10.16   | 10.05 | 10.72 | 10.71   | 10.73 |
| # 279 Naphthalene (Geo)                          | 8.10 <sup>a</sup>  | 8.51  | 8.51    | 8.31  | 8.79  | 8.79    | 8.63  |
| # 111 1,2-Butadiene                              | 9.10 <sup>a</sup>  | 9.49  | 9.49    | 9.33  | 9.75  | 9.75    | 9.66  |
| # 113 1-Butyne                                   | 10.20 <sup>a</sup> | 10.51 | 10.51   | 10.32 | 10.76 | 10.76   | 10.67 |
| # 118 Cyclobutene                                | 9.40 <sup>a</sup>  | 9.65  | 9.64    | 9.49  | 9.93  | 9.93    | 9.82  |
| # 153 Cyclopentene                               | 9.20 <sup>a</sup>  | 9.22  | 9.22    | 9.09  | 9.51  | 9.51    | 9.44  |
| # 162 Cyclopentane                               | 10.50 <sup>a</sup> | 10.91 | 10.91   | 10.87 | 11.28 | 11.29   | 11.38 |
| # 166 n-Pentane                                  | 10.30 <sup>a</sup> | 10.66 | 10.66   | 10.49 | 11.35 | 11.34   | 11.31 |
| # 205 Cycloheptatriene                           | 8.50 <sup>a</sup>  | 8.57  | 8.58    | 8.39  | 8.82  | 8.84    | 8.72  |
| # 207 Toluene                                    | 8.80 <sup>a</sup>  | 9.16  | 9.16    | 9.00  | 9.46  | 9.46    | 9.35  |
| # 231 Ethylbenzene                               | 8.80 <sup>a</sup>  | 9.14  | 9.14    | 8.96  | 9.47  | 9.47    | 9.35  |
| # 245 Bicyclo(2.2.2)-octane                      | 9.40 <sup>a</sup>  | 9.76  | 9.75    | 9.64  | 10.23 | 10.23   | 10.23 |
| # 299 Adamantane                                 | 9.60 <sup>a</sup>  | 9.59  | 9.59    | 9.49  | 10.06 | 10.06   | 10.07 |
| # 335 Anthracene                                 | 8.20 <sup>a</sup>  | 7.81  | 7.81    | 7.59  | 8.07  | 8.07    | 7.91  |
| # 447 Hydrogen cyanide (Geo)                     | 13.60 <sup>a</sup> | 13.91 | 13.91   | 13.89 | 13.94 | 13.94   | 13.86 |
| # 454 Methylamine (Geo)                          | 9.60 <sup>a</sup>  | 9.75  | 9.75    | 9.91  | 10.00 | 10.01   | 10.13 |
| # 459 Acetonitrile (Geo)                         | 12.20 <sup>a</sup> | 12.50 | 12.50   | 12.52 | 12.63 | 12.63   | 12.67 |
| # 460 Methyl isocyanide (Geo)                    | 11.30 <sup>a</sup> | 12.14 | 12.14   | 12.12 | 12.20 | 12.20   | 12.31 |
| # 462 Ethyleneimine (Azirane) (Geo)              | 9.90 <sup>a</sup>  | 10.13 | 10.13   | 10.19 | 10.39 | 10.39   | 10.41 |
| # 467 Dimethylamine (Geo)                        | 8.90 <sup>a</sup>  | 9.23  | 9.23    | 9.41  | 9.24  | 9.25    | 9.38  |
| # 470 CH <sub>3</sub> CN (Geo)                   | 11.80 <sup>a</sup> | 11.58 | 11.58   | 11.49 | 11.67 | 11.67   | 11.65 |
| # 472 Acrylonitrile (Geo)                        | 10.90 <sup>a</sup> | 10.88 | 10.88   | 10.80 | 11.09 | 11.09   | 11.06 |
| # 476 Trimethylamine (Geo)                       | 8.50 <sup>a</sup>  | 8.84  | 8.85    | 9.07  | 8.67  | 8.69    | 8.87  |
| # 484 Pyrrole (Geo)                              | 8.20 <sup>a</sup>  | 8.46  | 8.47    | 8.27  | 8.65  | 8.65    | 8.49  |
| # 493 Pyridine (Geo)                             | 9.70 <sup>a</sup>  | 9.96  | 9.96    | 9.78  | 10.13 | 10.13   | 10.08 |
| # 466 Ethylamine                                 | 9.50 <sup>a</sup>  | 9.60  | 9.60    | 9.63  | 9.95  | 9.95    | 10.01 |
| # 473 Ethyl cyanide                              | 11.90 <sup>a</sup> | 12.06 | 12.06   | 12.11 | 12.25 | 12.25   | 12.36 |
| # 508 Aniline                                    | 7.70 <sup>a</sup>  | 8.24  | 8.24    | 8.15  | 8.42  | 8.43    | 8.47  |
| # 518 Phenyl cyanide                             | 9.70 <sup>a</sup>  | 9.91  | 9.91    | 9.81  | 10.16 | 10.16   | 10.12 |
| # 593 Diazomethane                               | 9.00 <sup>a</sup>  | 8.84  | 8.84    | 8.74  | 8.75  | 8.75    | 8.63  |
| # 595 Methylhydrazine                            | 9.30 <sup>a</sup>  | 9.73  | 9.73    | 9.98  | 9.90  | 9.91    | 10.11 |
| # 687 Methyl Azide                               | 9.80 <sup>a</sup>  | 9.63  | 9.64    | 9.77  | 9.25  | 9.25    | 9.44  |
| # 729 Formaldehyde (Geo)                         | 10.10 <sup>a</sup> | 11.03 | 11.03   | 10.91 | 11.26 | 11.26   | 11.25 |
| # 735 Methanol (Geo)                             | 11.00 <sup>a</sup> | 11.22 | 11.22   | 11.17 | 11.60 | 11.60   | 11.66 |
| # 741 Ketene (Geo)                               | 9.60 <sup>a</sup>  | 9.75  | 9.75    | 9.59  | 9.97  | 9.97    | 9.82  |
| # 744 Acetaldehyde (Geo)                         | 10.20 <sup>a</sup> | 10.62 | 10.62   | 10.51 | 10.94 | 10.94   | 10.91 |
| # 747 Dimethyl ether (Geo)                       | 10.00 <sup>a</sup> | 10.51 | 10.51   | 10.43 | 10.94 | 10.94   | 11.03 |
| # 752 Acrolein (Geo)                             | 10.10 <sup>a</sup> | 10.55 | 10.55   | 10.44 | 10.86 | 10.86   | 10.82 |
| # 754 Acetone (Geo)                              | 9.70 <sup>a</sup>  | 10.29 | 10.29   | 10.17 | 10.65 | 10.65   | 10.56 |
| # 762 Furan (Geo)                                | 8.90 <sup>a</sup>  | 9.03  | 9.03    | 8.83  | 9.45  | 9.45    | 9.30  |

... continued on next page ...

Table S72: ... continued from previous page ...

| Species                       | Ref.               | OM2   | OM2-D3T | ODM2  | OM3   | OM3-D3T | ODM3  |
|-------------------------------|--------------------|-------|---------|-------|-------|---------|-------|
| # 1053 Formic acid (Geo)      | 11.50 <sup>a</sup> | 11.72 | 11.72   | 11.65 | 12.12 | 12.12   | 12.09 |
| # 1054 trans Glyoxal (Geo)    | 10.60 <sup>a</sup> | 10.57 | 10.57   | 10.50 | 10.77 | 10.77   | 10.74 |
| # 1059 Methyl formate (Geo)   | 11.00 <sup>a</sup> | 11.24 | 11.24   | 11.18 | 11.70 | 11.70   | 11.72 |
| # 745 Ethylene oxide          | 10.60 <sup>a</sup> | 11.31 | 11.31   | 11.21 | 11.79 | 11.79   | 11.84 |
| # 749 Ethanol                 | 10.60 <sup>a</sup> | 10.88 | 10.88   | 10.85 | 11.21 | 11.21   | 11.28 |
| # 755 Propanal                | 10.00 <sup>a</sup> | 10.38 | 10.38   | 10.28 | 10.71 | 10.71   | 10.69 |
| # 766 Butanal                 | 9.80 <sup>a</sup>  | 10.33 | 10.32   | 10.20 | 10.71 | 10.70   | 10.69 |
| # 770 Diethyl ether           | 9.60 <sup>a</sup>  | 10.23 | 10.23   | 10.16 | 10.60 | 10.60   | 10.68 |
| # 787 Benzaldehyde            | 9.70 <sup>a</sup>  | 9.93  | 9.94    | 9.79  | 10.26 | 10.27   | 10.15 |
| # 788 Anisole                 | 8.40 <sup>a</sup>  | 8.74  | 8.74    | 8.59  | 9.15  | 9.15    | 9.07  |
| # 1057 Acetic acid            | 10.80 <sup>a</sup> | 11.33 | 11.33   | 11.26 | 11.76 | 11.76   | 11.70 |
| # 1058 Acetic acid            | 10.80 <sup>a</sup> | 11.33 | 11.33   | 11.26 | 11.76 | 11.76   | 11.70 |
| # 1061 Dimethyl peroxide      | 10.60 <sup>a</sup> | 10.71 | 10.72   | 10.66 | 11.16 | 11.19   | 11.23 |
| # 1069 beta-Propiolactone     | 10.60 <sup>a</sup> | 10.96 | 10.96   | 10.89 | 11.39 | 11.39   | 11.36 |
| # 1072 Methyl acetate         | 10.60 <sup>a</sup> | 11.04 | 11.04   | 10.82 | 11.39 | 11.39   | 11.37 |
| # 1073 Propionic acid         | 10.50 <sup>a</sup> | 11.07 | 11.07   | 11.00 | 11.48 | 11.48   | 11.44 |
| # 1091 Acetylacetone          | 9.10 <sup>a</sup>  | 10.30 | 10.30   | 10.18 | 10.68 | 10.69   | 10.59 |
| # 1125 Benzoic acid           | 9.80 <sup>a</sup>  | 10.08 | 10.08   | 9.92  | 10.34 | 10.34   | 10.19 |
| # 1323 Maleic anhydride       | 10.80 <sup>a</sup> | 11.72 | 11.72   | 11.68 | 12.07 | 12.07   | 12.00 |
| # 1329 o-Salicylic acid       | 9.80 <sup>a</sup>  | 9.23  | 9.23    | 9.13  | 9.51  | 9.51    | 9.44  |
| # 1375 Oxalic acid            | 11.20 <sup>a</sup> | 11.41 | 11.41   | 11.36 | 11.62 | 11.62   | 11.53 |
| # 1496 Fluoromethane (Geo)    | 13.30 <sup>a</sup> | 13.07 | 13.07   | 13.11 | 13.41 | 13.41   | 13.67 |
| # 1498 Fluoroacetylene (Geo)  | 11.30 <sup>a</sup> | 11.33 | 11.33   | 11.21 | 11.52 | 11.52   | 11.51 |
| # 1500 Fluoroethylene (Geo)   | 10.60 <sup>a</sup> | 10.59 | 10.59   | 10.44 | 10.85 | 10.85   | 10.81 |
| # 1586 Trifluoromethane (Geo) | 14.80 <sup>a</sup> | 14.17 | 14.17   | 14.19 | 14.45 | 14.45   | 14.78 |
| # 1503 Fluoroethane           | 12.40 <sup>a</sup> | 12.01 | 12.01   | 12.02 | 12.28 | 12.28   | 12.47 |
| # 1505 2-Fluoropropane        | 11.10 <sup>a</sup> | 11.59 | 11.59   | 11.51 | 11.92 | 11.92   | 12.09 |
| # 1506 Fluorobenzene          | 9.20 <sup>a</sup>  | 9.58  | 9.58    | 9.43  | 9.85  | 9.85    | 9.79  |
| # 1546 Difluoromethane        | 13.20 <sup>a</sup> | 12.98 | 12.98   | 13.02 | 13.23 | 13.23   | 13.54 |
| # 1550 gem-Difluoroethylene   | 10.70 <sup>a</sup> | 10.38 | 10.38   | 10.27 | 10.56 | 10.56   | 10.63 |
| # 1552 1,1-Difluoroethane     | 12.80 <sup>a</sup> | 12.30 | 12.30   | 12.28 | 12.69 | 12.69   | 12.91 |
| # 1588 Trifluoroethylene      | 10.50 <sup>a</sup> | 10.40 | 10.40   | 10.30 | 10.53 | 10.53   | 10.66 |
| # 1592 1,1,1-Trifluoroethane  | 13.80 <sup>a</sup> | 13.23 | 13.23   | 13.21 | 13.78 | 13.78   | 13.98 |
| # 1594 Trifluoromethylbenze   | 9.70 <sup>a</sup>  | 10.20 | 10.20   | 10.01 | 10.47 | 10.48   | 10.35 |
| # 1625 Pentafluorobenzene     | 9.80 <sup>a</sup>  | 10.19 | 10.19   | 10.08 | 10.30 | 10.30   | 10.39 |
| # 921 Hydrogen isocyanate     | 11.60 <sup>a</sup> | 11.34 | 11.34   | 11.44 | 11.43 | 11.43   | 11.54 |
| # 1213 Methyl nitrite         | 11.00 <sup>a</sup> | 10.97 | 10.98   | 10.94 | 11.06 | 11.06   | 11.07 |
| # 1214 Nitromethane           | 11.30 <sup>a</sup> | 11.84 | 11.84   | 11.84 | 11.74 | 11.74   | 11.55 |
| # 1219 Alanine                | 8.90 <sup>a</sup>  | 9.84  | 9.84    | 9.86  | 10.06 | 10.07   | 10.11 |
| # 1245 Nitrobenzene           | 9.90 <sup>a</sup>  | 10.50 | 10.50   | 10.32 | 10.81 | 10.81   | 10.66 |

<sup>a</sup> Taken from the experimental and high-level ab initio data quoted in: [http://openmopac.net/PM7\\_accuracy/molecules.html](http://openmopac.net/PM7_accuracy/molecules.html) ; J.J.P.Stewart, J.Mol.Model. 19, 1 (2013).

Table S73: Benchmark Results for the C7H10O2 Set. Atomization Enthalpies at 298 K (kcal/mol)

| Species | Ref.                | OM2    | OM2-D3T | ODM2   | OM3    | OM3-D3T | ODM3   |
|---------|---------------------|--------|---------|--------|--------|---------|--------|
| gdb 1   | 1909.1 <sup>a</sup> | 1905.9 | 1905.9  | 1907.7 | 1903.6 | 1903.6  | 1903.5 |
| gdb 2   | 1908.3 <sup>a</sup> | 1904.9 | 1904.9  | 1907.0 | 1902.3 | 1902.2  | 1902.4 |
| gdb 3   | 1904.5 <sup>a</sup> | 1896.8 | 1896.8  | 1898.9 | 1897.4 | 1897.4  | 1896.9 |
| gdb 4   | 1906.2 <sup>a</sup> | 1904.5 | 1904.5  | 1906.8 | 1903.3 | 1903.2  | 1903.1 |
| gdb 5   | 1907.7 <sup>a</sup> | 1905.2 | 1905.2  | 1907.6 | 1904.2 | 1904.2  | 1904.3 |
| gdb 6   | 1904.3 <sup>a</sup> | 1896.8 | 1896.8  | 1898.9 | 1897.3 | 1897.3  | 1896.8 |
| gdb 7   | 1907.7 <sup>a</sup> | 1904.4 | 1904.4  | 1906.4 | 1903.4 | 1903.4  | 1903.0 |
| gdb 8   | 1910.1 <sup>a</sup> | 1906.7 | 1906.7  | 1908.2 | 1906.2 | 1906.2  | 1905.7 |
| gdb 9   | 1907.9 <sup>a</sup> | 1904.8 | 1904.8  | 1906.0 | 1904.1 | 1904.1  | 1903.2 |
| gdb 10  | 1906.5 <sup>a</sup> | 1902.4 | 1902.4  | 1903.9 | 1900.9 | 1900.8  | 1900.6 |
| gdb 11  | 1899.8 <sup>a</sup> | 1891.4 | 1891.4  | 1892.5 | 1887.9 | 1887.9  | 1890.1 |
| gdb 12  | 1908.0 <sup>a</sup> | 1901.6 | 1901.6  | 1903.0 | 1901.4 | 1901.4  | 1901.5 |
| gdb 13  | 1895.5 <sup>a</sup> | 1886.7 | 1886.6  | 1888.7 | 1884.1 | 1884.1  | 1885.8 |
| gdb 14  | 1905.8 <sup>a</sup> | 1899.2 | 1899.2  | 1900.9 | 1898.5 | 1898.4  | 1898.7 |
| gdb 15  | 1911.0 <sup>a</sup> | 1904.2 | 1904.2  | 1905.5 | 1905.9 | 1905.9  | 1904.6 |
| gdb 16  | 1903.9 <sup>a</sup> | 1896.8 | 1896.8  | 1899.1 | 1896.6 | 1896.6  | 1897.3 |
| gdb 17  | 1905.0 <sup>a</sup> | 1900.8 | 1900.8  | 1903.0 | 1899.8 | 1899.8  | 1899.8 |
| gdb 18  | 1894.1 <sup>a</sup> | 1890.0 | 1890.0  | 1890.8 | 1885.7 | 1885.7  | 1887.1 |
| gdb 19  | 1903.7 <sup>a</sup> | 1896.7 | 1896.7  | 1899.4 | 1895.6 | 1895.6  | 1896.4 |
| gdb 20  | 1902.6 <sup>a</sup> | 1897.4 | 1897.4  | 1899.0 | 1896.3 | 1896.3  | 1896.4 |
| gdb 21  | 1892.5 <sup>a</sup> | 1887.8 | 1887.8  | 1889.0 | 1883.6 | 1883.6  | 1885.4 |
| gdb 22  | 1906.0 <sup>a</sup> | 1903.0 | 1903.0  | 1904.6 | 1902.4 | 1902.4  | 1902.0 |
| gdb 23  | 1906.0 <sup>a</sup> | 1898.4 | 1898.4  | 1900.4 | 1899.7 | 1899.7  | 1898.5 |
| gdb 24  | 1898.1 <sup>a</sup> | 1890.5 | 1890.5  | 1891.5 | 1886.7 | 1886.6  | 1888.1 |
| gdb 25  | 1908.9 <sup>a</sup> | 1904.3 | 1904.3  | 1905.3 | 1904.3 | 1904.2  | 1903.8 |
| gdb 26  | 1907.8 <sup>a</sup> | 1900.6 | 1900.5  | 1901.9 | 1902.3 | 1902.3  | 1901.1 |
| gdb 27  | 1899.8 <sup>a</sup> | 1892.5 | 1892.5  | 1892.9 | 1889.4 | 1889.4  | 1890.6 |
| gdb 28  | 1909.0 <sup>a</sup> | 1906.1 | 1906.1  | 1907.2 | 1906.4 | 1906.3  | 1905.9 |
| gdb 29  | 1897.9 <sup>a</sup> | 1891.1 | 1891.1  | 1891.9 | 1889.4 | 1889.4  | 1890.0 |
| gdb 30  | 1908.1 <sup>a</sup> | 1903.4 | 1903.4  | 1905.1 | 1903.0 | 1903.0  | 1902.8 |
| gdb 31  | 1895.5 <sup>a</sup> | 1888.9 | 1888.9  | 1890.3 | 1886.6 | 1886.6  | 1887.4 |
| gdb 32  | 1903.8 <sup>a</sup> | 1900.4 | 1900.4  | 1902.1 | 1900.1 | 1900.0  | 1899.9 |
| gdb 33  | 1902.8 <sup>a</sup> | 1899.0 | 1899.0  | 1900.7 | 1898.7 | 1898.7  | 1898.5 |
| gdb 34  | 1892.7 <sup>a</sup> | 1885.3 | 1885.3  | 1886.9 | 1883.0 | 1883.0  | 1883.9 |
| gdb 35  | 1894.8 <sup>a</sup> | 1886.5 | 1886.6  | 1887.6 | 1883.0 | 1882.9  | 1884.7 |
| gdb 36  | 1908.9 <sup>a</sup> | 1904.8 | 1904.8  | 1905.6 | 1904.8 | 1904.8  | 1904.7 |
| gdb 37  | 1907.8 <sup>a</sup> | 1900.6 | 1900.5  | 1901.8 | 1902.4 | 1902.3  | 1901.1 |
| gdb 38  | 1899.4 <sup>a</sup> | 1892.4 | 1892.4  | 1892.8 | 1889.1 | 1889.1  | 1891.1 |
| gdb 39  | 1904.7 <sup>a</sup> | 1899.8 | 1899.8  | 1901.2 | 1899.7 | 1899.7  | 1899.2 |
| gdb 40  | 1892.5 <sup>a</sup> | 1885.5 | 1885.4  | 1886.6 | 1883.0 | 1882.9  | 1883.7 |
| gdb 41  | 1903.7 <sup>a</sup> | 1898.7 | 1898.7  | 1900.0 | 1898.6 | 1898.6  | 1898.1 |
| gdb 42  | 1894.7 <sup>a</sup> | 1886.5 | 1886.5  | 1887.4 | 1882.9 | 1882.9  | 1884.5 |
| gdb 43  | 1906.1 <sup>a</sup> | 1901.3 | 1901.3  | 1902.1 | 1901.5 | 1901.5  | 1900.8 |
| gdb 44  | 1896.6 <sup>a</sup> | 1889.0 | 1889.0  | 1889.4 | 1885.8 | 1885.7  | 1887.1 |
| gdb 45  | 1908.0 <sup>a</sup> | 1903.2 | 1903.2  | 1904.9 | 1902.9 | 1902.9  | 1902.6 |
| gdb 46  | 1905.9 <sup>a</sup> | 1898.3 | 1898.3  | 1900.1 | 1899.7 | 1899.7  | 1898.7 |
| gdb 47  | 1897.7 <sup>a</sup> | 1888.0 | 1888.0  | 1889.5 | 1885.9 | 1885.9  | 1887.1 |
| gdb 48  | 1901.8 <sup>a</sup> | 1897.5 | 1897.4  | 1899.7 | 1896.7 | 1896.7  | 1896.7 |
| gdb 49  | 1892.4 <sup>a</sup> | 1882.7 | 1882.7  | 1884.1 | 1879.6 | 1879.6  | 1880.6 |
| gdb 50  | 1905.4 <sup>a</sup> | 1899.5 | 1899.5  | 1900.0 | 1899.3 | 1899.3  | 1898.8 |
| gdb 51  | 1902.9 <sup>a</sup> | 1894.6 | 1894.6  | 1896.8 | 1896.2 | 1896.2  | 1895.5 |
| gdb 52  | 1898.2 <sup>a</sup> | 1890.2 | 1890.2  | 1890.3 | 1886.8 | 1886.7  | 1888.0 |
| gdb 53  | 1893.9 <sup>a</sup> | 1888.8 | 1888.8  | 1889.2 | 1885.2 | 1885.2  | 1886.3 |
| gdb 54  | 1905.8 <sup>a</sup> | 1899.6 | 1899.6  | 1900.1 | 1899.5 | 1899.5  | 1899.1 |
| gdb 55  | 1896.1 <sup>a</sup> | 1888.5 | 1888.5  | 1889.2 | 1886.6 | 1886.5  | 1887.2 |
| gdb 56  | 1894.2 <sup>a</sup> | 1890.3 | 1890.3  | 1890.6 | 1886.7 | 1886.7  | 1888.0 |
| gdb 57  | 1905.4 <sup>a</sup> | 1899.5 | 1899.5  | 1899.8 | 1899.4 | 1899.4  | 1898.6 |
| gdb 58  | 1902.8 <sup>a</sup> | 1894.6 | 1894.6  | 1896.5 | 1896.2 | 1896.2  | 1895.4 |
| gdb 59  | 1898.1 <sup>a</sup> | 1890.2 | 1890.2  | 1890.8 | 1886.7 | 1886.7  | 1887.9 |
| gdb 60  | 1893.6 <sup>a</sup> | 1889.1 | 1889.1  | 1889.2 | 1885.3 | 1885.3  | 1886.1 |
| gdb 61  | 1907.6 <sup>a</sup> | 1901.5 | 1901.5  | 1902.9 | 1902.5 | 1902.5  | 1902.3 |
| gdb 62  | 1900.2 <sup>a</sup> | 1892.3 | 1892.3  | 1892.0 | 1889.4 | 1889.4  | 1890.5 |

... continued on next page ...

Table S73: ... continued from previous page ...

| Species | Ref.                | OM2    | OM2-D3T | ODM2   | OM3    | OM3-D3T | ODM3   |
|---------|---------------------|--------|---------|--------|--------|---------|--------|
| gdb 63  | 1896.2 <sup>a</sup> | 1891.3 | 1891.3  | 1890.9 | 1888.0 | 1888.0  | 1888.7 |
| gdb 64  | 1905.7 <sup>a</sup> | 1899.5 | 1899.5  | 1899.5 | 1899.5 | 1899.5  | 1898.8 |
| gdb 65  | 1895.9 <sup>a</sup> | 1888.4 | 1888.4  | 1888.9 | 1886.4 | 1886.4  | 1886.9 |
| gdb 66  | 1894.9 <sup>a</sup> | 1889.5 | 1889.5  | 1889.5 | 1886.2 | 1886.2  | 1887.2 |
| gdb 67  | 1903.3 <sup>a</sup> | 1897.0 | 1897.0  | 1899.6 | 1896.9 | 1896.8  | 1897.2 |
| gdb 68  | 1895.7 <sup>a</sup> | 1885.3 | 1885.3  | 1886.6 | 1883.1 | 1883.1  | 1883.7 |
| gdb 69  | 1893.1 <sup>a</sup> | 1887.1 | 1887.0  | 1887.8 | 1883.2 | 1883.2  | 1884.6 |
| gdb 70  | 1894.8 <sup>a</sup> | 1886.7 | 1886.7  | 1887.3 | 1882.6 | 1883.2  | 1884.9 |
| gdb 71  | 1893.7 <sup>a</sup> | 1888.6 | 1888.6  | 1888.1 | 1885.0 | 1885.0  | 1885.8 |
| gdb 72  | 1893.7 <sup>a</sup> | 1887.5 | 1887.5  | 1887.7 | 1884.4 | 1884.4  | 1885.8 |
| gdb 73  | 1902.3 <sup>a</sup> | 1895.5 | 1895.5  | 1897.5 | 1896.4 | 1896.4  | 1896.7 |
| gdb 74  | 1890.4 <sup>a</sup> | 1882.6 | 1882.6  | 1883.9 | 1879.6 | 1879.6  | 1881.0 |
| gdb 75  | 1892.8 <sup>a</sup> | 1887.6 | 1887.6  | 1887.6 | 1883.8 | 1883.8  | 1884.9 |
| gdb 76  | 1891.5 <sup>a</sup> | 1885.3 | 1885.3  | 1885.9 | 1881.8 | 1881.8  | 1883.3 |
| gdb 77  | 1900.1 <sup>a</sup> | 1893.1 | 1893.1  | 1895.7 | 1893.8 | 1893.8  | 1894.3 |
| gdb 78  | 1863.7 <sup>a</sup> | 1865.6 | 1865.6  | 1868.1 | 1857.9 | 1857.8  | 1863.5 |
| gdb 79  | 1856.9 <sup>a</sup> | 1859.9 | 1859.9  | 1864.0 | 1854.6 | 1854.6  | 1859.8 |
| gdb 80  | 1865.3 <sup>a</sup> | 1865.1 | 1865.1  | 1868.3 | 1857.5 | 1857.5  | 1863.6 |
| gdb 81  | 1855.6 <sup>a</sup> | 1858.6 | 1858.6  | 1861.9 | 1853.1 | 1853.1  | 1858.0 |
| gdb 82  | 1855.7 <sup>a</sup> | 1856.0 | 1856.0  | 1860.1 | 1851.5 | 1851.5  | 1857.1 |
| gdb 83  | 1859.4 <sup>a</sup> | 1862.7 | 1862.7  | 1865.8 | 1854.7 | 1854.7  | 1860.0 |
| gdb 84  | 1868.4 <sup>a</sup> | 1867.7 | 1867.7  | 1869.9 | 1860.2 | 1860.2  | 1865.8 |
| gdb 85  | 1862.5 <sup>a</sup> | 1861.0 | 1861.0  | 1864.3 | 1856.4 | 1856.4  | 1861.0 |
| gdb 86  | 1866.5 <sup>a</sup> | 1865.8 | 1865.8  | 1868.8 | 1858.0 | 1857.9  | 1864.1 |
| gdb 87  | 1869.8 <sup>a</sup> | 1870.5 | 1870.5  | 1872.2 | 1862.9 | 1862.8  | 1868.0 |
| gdb 88  | 1864.3 <sup>a</sup> | 1869.3 | 1869.3  | 1871.9 | 1861.5 | 1861.4  | 1865.7 |
| gdb 89  | 1866.1 <sup>a</sup> | 1871.7 | 1871.7  | 1874.2 | 1863.9 | 1863.9  | 1867.8 |
| gdb 90  | 1865.3 <sup>a</sup> | 1871.5 | 1871.5  | 1873.1 | 1863.6 | 1863.6  | 1867.3 |
| gdb 91  | 1855.1 <sup>a</sup> | 1860.0 | 1860.0  | 1861.5 | 1854.8 | 1854.8  | 1858.3 |
| gdb 92  | 1840.0 <sup>a</sup> | 1837.5 | 1837.5  | 1839.4 | 1832.2 | 1832.2  | 1836.0 |
| gdb 93  | 1837.5 <sup>a</sup> | 1835.1 | 1835.0  | 1836.5 | 1829.8 | 1829.8  | 1833.3 |
| gdb 94  | 1835.6 <sup>a</sup> | 1832.7 | 1832.7  | 1834.0 | 1827.8 | 1827.8  | 1831.7 |
| gdb 95  | 1838.9 <sup>a</sup> | 1836.6 | 1836.6  | 1833.9 | 1829.0 | 1829.0  | 1827.7 |
| gdb 96  | 1836.4 <sup>a</sup> | 1834.3 | 1834.3  | 1831.7 | 1827.4 | 1827.4  | 1826.2 |
| gdb 97  | 1831.6 <sup>a</sup> | 1813.5 | 1813.5  | 1812.0 | 1807.5 | 1807.5  | 1804.0 |
| gdb 98  | 1842.0 <sup>a</sup> | 1827.0 | 1827.0  | 1826.2 | 1823.0 | 1823.0  | 1821.4 |
| gdb 99  | 1840.1 <sup>a</sup> | 1824.9 | 1824.9  | 1824.0 | 1820.7 | 1820.7  | 1819.3 |
| gdb 100 | 1847.8 <sup>a</sup> | 1837.7 | 1837.7  | 1834.0 | 1829.4 | 1829.4  | 1824.2 |
| gdb 101 | 1832.3 <sup>a</sup> | 1820.8 | 1820.8  | 1823.1 | 1819.6 | 1819.6  | 1822.0 |
| gdb 102 | 1870.0 <sup>a</sup> | 1870.9 | 1870.9  | 1869.9 | 1864.5 | 1864.5  | 1863.6 |
| gdb 103 | 1826.4 <sup>a</sup> | 1810.3 | 1810.2  | 1808.9 | 1804.4 | 1804.4  | 1801.2 |
| gdb 104 | 1820.2 <sup>a</sup> | 1806.5 | 1806.4  | 1809.8 | 1802.5 | 1802.4  | 1804.2 |
| gdb 105 | 1838.1 <sup>a</sup> | 1823.7 | 1823.7  | 1823.3 | 1819.4 | 1819.4  | 1818.1 |
| gdb 106 | 1831.0 <sup>a</sup> | 1819.0 | 1819.0  | 1821.1 | 1817.9 | 1817.9  | 1820.2 |
| gdb 107 | 1844.5 <sup>a</sup> | 1836.1 | 1836.1  | 1832.6 | 1827.6 | 1827.5  | 1822.6 |
| gdb 108 | 1841.9 <sup>a</sup> | 1828.0 | 1828.0  | 1827.5 | 1823.6 | 1823.6  | 1822.1 |
| gdb 109 | 1839.2 <sup>a</sup> | 1835.0 | 1835.0  | 1834.0 | 1828.8 | 1828.8  | 1827.2 |
| gdb 110 | 1870.4 <sup>a</sup> | 1871.6 | 1871.6  | 1870.8 | 1864.9 | 1864.9  | 1864.2 |
| gdb 111 | 1871.1 <sup>a</sup> | 1874.9 | 1874.9  | 1875.9 | 1868.3 | 1868.2  | 1871.8 |
| gdb 112 | 1841.0 <sup>a</sup> | 1829.1 | 1829.1  | 1832.3 | 1827.4 | 1827.4  | 1830.3 |
| gdb 113 | 1841.7 <sup>a</sup> | 1833.2 | 1833.2  | 1835.7 | 1830.3 | 1830.3  | 1833.1 |
| gdb 114 | 1839.0 <sup>a</sup> | 1834.9 | 1834.9  | 1836.6 | 1830.4 | 1830.4  | 1833.2 |
| gdb 115 | 1850.3 <sup>a</sup> | 1844.8 | 1844.8  | 1844.6 | 1837.1 | 1837.1  | 1835.8 |
| gdb 116 | 1856.3 <sup>a</sup> | 1846.8 | 1846.8  | 1850.7 | 1845.3 | 1845.3  | 1850.3 |
| gdb 117 | 1864.4 <sup>a</sup> | 1857.5 | 1857.5  | 1860.0 | 1851.8 | 1851.8  | 1857.2 |
| gdb 118 | 1858.5 <sup>a</sup> | 1843.1 | 1843.1  | 1846.1 | 1842.4 | 1842.4  | 1846.3 |
| gdb 119 | 1860.0 <sup>a</sup> | 1846.4 | 1846.4  | 1849.1 | 1844.8 | 1844.8  | 1848.7 |
| gdb 120 | 1859.1 <sup>a</sup> | 1845.8 | 1845.8  | 1848.5 | 1844.0 | 1844.0  | 1847.7 |
| gdb 121 | 1866.1 <sup>a</sup> | 1857.3 | 1857.3  | 1856.9 | 1851.0 | 1851.0  | 1850.9 |
| gdb 122 | 1881.1 <sup>a</sup> | 1879.7 | 1879.7  | 1881.4 | 1874.9 | 1874.6  | 1877.9 |
| gdb 123 | 1877.0 <sup>a</sup> | 1876.3 | 1876.3  | 1879.3 | 1874.3 | 1874.3  | 1877.8 |
| gdb 124 | 1879.9 <sup>a</sup> | 1879.4 | 1879.4  | 1882.0 | 1876.0 | 1876.0  | 1879.5 |
| gdb 125 | 1882.7 <sup>a</sup> | 1882.5 | 1882.5  | 1884.8 | 1878.1 | 1878.1  | 1881.8 |
| gdb 126 | 1888.6 <sup>a</sup> | 1882.9 | 1882.9  | 1881.6 | 1876.4 | 1876.4  | 1874.9 |
| gdb 127 | 1886.4 <sup>a</sup> | 1888.2 | 1888.2  | 1890.9 | 1879.6 | 1879.6  | 1884.3 |

... continued on next page ...

Table S73: ... continued from previous page ...

| Species | Ref.                | OM2    | OM2-D3T | ODM2   | OM3    | OM3-D3T | ODM3   |
|---------|---------------------|--------|---------|--------|--------|---------|--------|
| gdb 128 | 1886.2 <sup>a</sup> | 1885.8 | 1885.8  | 1889.3 | 1880.3 | 1880.3  | 1883.6 |
| gdb 129 | 1892.7 <sup>a</sup> | 1894.0 | 1894.0  | 1896.7 | 1885.6 | 1885.5  | 1889.4 |
| gdb 130 | 1886.3 <sup>a</sup> | 1883.1 | 1883.1  | 1883.1 | 1875.1 | 1875.1  | 1875.0 |
| gdb 131 | 1886.2 <sup>a</sup> | 1882.2 | 1882.2  | 1882.2 | 1874.4 | 1874.4  | 1875.0 |
| gdb 132 | 1889.5 <sup>a</sup> | 1885.4 | 1885.4  | 1884.9 | 1877.2 | 1877.2  | 1876.2 |
| gdb 133 | 1880.8 <sup>a</sup> | 1885.2 | 1885.2  | 1888.0 | 1879.1 | 1879.1  | 1882.3 |
| gdb 134 | 1885.7 <sup>a</sup> | 1891.2 | 1891.2  | 1893.4 | 1882.7 | 1882.7  | 1886.8 |
| gdb 135 | 1885.7 <sup>a</sup> | 1886.0 | 1886.0  | 1885.3 | 1878.3 | 1878.3  | 1877.4 |
| gdb 136 | 1859.0 <sup>a</sup> | 1859.6 | 1859.6  | 1864.0 | 1854.7 | 1854.7  | 1859.1 |
| gdb 137 | 1863.1 <sup>a</sup> | 1863.3 | 1863.3  | 1866.6 | 1856.0 | 1856.0  | 1861.2 |
| gdb 138 | 1861.8 <sup>a</sup> | 1856.9 | 1856.9  | 1856.9 | 1850.8 | 1850.8  | 1850.5 |
| gdb 139 | 1862.4 <sup>a</sup> | 1859.7 | 1859.7  | 1859.9 | 1852.8 | 1852.8  | 1852.6 |
| gdb 140 | 1886.7 <sup>a</sup> | 1885.5 | 1885.5  | 1887.8 | 1879.3 | 1879.3  | 1884.3 |
| gdb 141 | 1888.4 <sup>a</sup> | 1888.8 | 1888.8  | 1891.7 | 1883.4 | 1883.4  | 1887.7 |
| gdb 142 | 1882.8 <sup>a</sup> | 1881.9 | 1881.9  | 1885.1 | 1878.6 | 1878.6  | 1882.3 |
| gdb 143 | 1880.3 <sup>a</sup> | 1879.9 | 1879.9  | 1883.1 | 1876.6 | 1876.6  | 1880.6 |
| gdb 144 | 1884.8 <sup>a</sup> | 1884.3 | 1884.3  | 1887.1 | 1879.2 | 1879.1  | 1882.8 |
| gdb 145 | 1865.6 <sup>a</sup> | 1860.6 | 1860.6  | 1863.5 | 1853.9 | 1853.9  | 1859.1 |
| gdb 146 | 1862.4 <sup>a</sup> | 1855.3 | 1855.3  | 1859.6 | 1851.8 | 1851.8  | 1856.9 |
| gdb 147 | 1866.6 <sup>a</sup> | 1859.1 | 1859.1  | 1861.5 | 1853.0 | 1853.0  | 1858.5 |
| gdb 148 | 1856.9 <sup>a</sup> | 1844.4 | 1844.4  | 1847.7 | 1842.3 | 1842.3  | 1846.1 |
| gdb 149 | 1860.2 <sup>a</sup> | 1845.7 | 1845.7  | 1848.5 | 1844.3 | 1844.3  | 1847.8 |
| gdb 150 | 1859.8 <sup>a</sup> | 1843.8 | 1843.8  | 1847.1 | 1842.3 | 1842.3  | 1846.4 |
| gdb 151 | 1852.1 <sup>a</sup> | 1836.9 | 1836.9  | 1842.1 | 1831.2 | 1831.2  | 1838.3 |
| gdb 152 | 1846.5 <sup>a</sup> | 1830.1 | 1830.1  | 1836.3 | 1826.1 | 1826.1  | 1832.7 |
| gdb 153 | 1838.6 <sup>a</sup> | 1827.2 | 1827.2  | 1829.6 | 1823.8 | 1823.8  | 1825.6 |
| gdb 154 | 1841.8 <sup>a</sup> | 1829.5 | 1829.5  | 1832.3 | 1825.2 | 1825.1  | 1826.8 |
| gdb 155 | 1842.9 <sup>a</sup> | 1828.0 | 1827.9  | 1831.5 | 1825.1 | 1825.0  | 1828.1 |
| gdb 156 | 1840.6 <sup>a</sup> | 1826.1 | 1826.1  | 1829.4 | 1823.5 | 1823.4  | 1826.9 |
| gdb 157 | 1846.1 <sup>a</sup> | 1836.9 | 1836.9  | 1837.2 | 1830.1 | 1830.1  | 1829.8 |
| gdb 158 | 1842.8 <sup>a</sup> | 1834.3 | 1834.3  | 1834.6 | 1827.8 | 1827.8  | 1827.8 |
| gdb 159 | 1875.5 <sup>a</sup> | 1868.1 | 1868.1  | 1872.1 | 1861.9 | 1861.9  | 1866.6 |
| gdb 160 | 1869.7 <sup>a</sup> | 1864.5 | 1864.5  | 1868.9 | 1859.9 | 1859.8  | 1864.3 |
| gdb 161 | 1872.3 <sup>a</sup> | 1865.1 | 1865.1  | 1870.0 | 1860.7 | 1860.7  | 1864.9 |
| gdb 162 | 1877.2 <sup>a</sup> | 1870.1 | 1870.1  | 1874.2 | 1862.9 | 1862.9  | 1868.1 |
| gdb 163 | 1876.9 <sup>a</sup> | 1872.2 | 1872.2  | 1874.4 | 1866.1 | 1866.0  | 1868.2 |
| gdb 164 | 1877.6 <sup>a</sup> | 1872.9 | 1872.9  | 1874.9 | 1866.9 | 1866.9  | 1868.8 |
| gdb 165 | 1854.0 <sup>a</sup> | 1834.4 | 1834.4  | 1838.7 | 1828.4 | 1828.4  | 1834.9 |
| gdb 166 | 1852.3 <sup>a</sup> | 1828.1 | 1828.1  | 1833.9 | 1825.6 | 1825.5  | 1831.4 |
| gdb 167 | 1853.3 <sup>a</sup> | 1831.9 | 1831.9  | 1836.6 | 1826.1 | 1826.1  | 1832.7 |
| gdb 168 | 1847.2 <sup>a</sup> | 1828.6 | 1828.6  | 1831.4 | 1825.2 | 1825.1  | 1826.9 |
| gdb 169 | 1843.5 <sup>a</sup> | 1827.6 | 1827.6  | 1830.0 | 1823.7 | 1823.7  | 1825.7 |
| gdb 170 | 1842.4 <sup>a</sup> | 1826.6 | 1826.6  | 1829.0 | 1822.7 | 1822.7  | 1824.4 |
| gdb 171 | 1870.7 <sup>a</sup> | 1865.6 | 1865.6  | 1868.9 | 1859.6 | 1859.6  | 1862.6 |
| gdb 172 | 1879.7 <sup>a</sup> | 1885.0 | 1885.0  | 1888.0 | 1874.7 | 1874.7  | 1878.7 |
| gdb 173 | 1873.4 <sup>a</sup> | 1873.0 | 1873.0  | 1875.6 | 1865.4 | 1865.4  | 1868.2 |
| gdb 174 | 1882.2 <sup>a</sup> | 1882.2 | 1882.2  | 1885.0 | 1874.8 | 1874.8  | 1876.9 |
| gdb 175 | 1886.5 <sup>a</sup> | 1883.8 | 1883.8  | 1887.7 | 1874.7 | 1874.7  | 1880.3 |
| gdb 176 | 1879.5 <sup>a</sup> | 1876.4 | 1876.4  | 1879.1 | 1870.5 | 1870.4  | 1873.0 |
| gdb 177 | 1881.7 <sup>a</sup> | 1878.4 | 1878.4  | 1881.5 | 1872.3 | 1872.3  | 1874.7 |
| gdb 178 | 1856.1 <sup>a</sup> | 1845.4 | 1845.4  | 1849.7 | 1838.6 | 1838.5  | 1843.6 |
| gdb 179 | 1845.7 <sup>a</sup> | 1838.1 | 1838.1  | 1839.8 | 1832.8 | 1832.8  | 1833.2 |
| gdb 180 | 1844.2 <sup>a</sup> | 1836.5 | 1836.5  | 1838.5 | 1832.0 | 1832.0  | 1833.1 |
| gdb 181 | 1865.2 <sup>a</sup> | 1862.4 | 1862.3  | 1865.3 | 1857.5 | 1857.5  | 1862.2 |
| gdb 182 | 1865.0 <sup>a</sup> | 1866.0 | 1866.0  | 1868.7 | 1861.5 | 1861.5  | 1864.5 |
| gdb 183 | 1872.8 <sup>a</sup> | 1869.6 | 1869.6  | 1868.8 | 1862.8 | 1862.8  | 1861.6 |
| gdb 184 | 1870.7 <sup>a</sup> | 1865.5 | 1865.5  | 1864.6 | 1858.8 | 1858.8  | 1858.1 |
| gdb 185 | 1868.1 <sup>a</sup> | 1871.2 | 1871.2  | 1873.7 | 1863.2 | 1863.0  | 1866.5 |
| gdb 186 | 1865.5 <sup>a</sup> | 1864.8 | 1864.8  | 1864.3 | 1857.4 | 1857.4  | 1856.3 |
| gdb 187 | 1863.3 <sup>a</sup> | 1862.7 | 1862.7  | 1862.7 | 1855.7 | 1855.7  | 1855.1 |
| gdb 188 | 1861.4 <sup>a</sup> | 1856.2 | 1856.2  | 1859.2 | 1853.1 | 1853.1  | 1855.7 |
| gdb 189 | 1875.3 <sup>a</sup> | 1864.8 | 1864.8  | 1864.5 | 1859.5 | 1859.4  | 1858.4 |
| gdb 190 | 1855.0 <sup>a</sup> | 1860.2 | 1860.2  | 1865.4 | 1856.3 | 1856.3  | 1861.7 |
| gdb 191 | 1911.8 <sup>a</sup> | 1917.1 | 1917.1  | 1920.4 | 1910.2 | 1910.2  | 1913.6 |
| gdb 192 | 1915.6 <sup>a</sup> | 1921.4 | 1921.4  | 1923.7 | 1911.7 | 1911.7  | 1915.6 |

... continued on next page ...

Table S73: ... continued from previous page ...

| Species | Ref.                | OM2    | OM2-D3T | ODM2   | OM3    | OM3-D3T | ODM3   |
|---------|---------------------|--------|---------|--------|--------|---------|--------|
| gdb 193 | 1914.3 <sup>a</sup> | 1922.1 | 1922.1  | 1924.5 | 1912.0 | 1912.0  | 1915.9 |
| gdb 194 | 1911.3 <sup>a</sup> | 1917.5 | 1917.5  | 1920.6 | 1908.2 | 1908.2  | 1912.8 |
| gdb 195 | 1868.2 <sup>a</sup> | 1868.1 | 1868.1  | 1871.2 | 1862.5 | 1862.5  | 1867.6 |
| gdb 196 | 1872.6 <sup>a</sup> | 1872.7 | 1872.7  | 1875.2 | 1868.0 | 1867.9  | 1871.1 |
| gdb 197 | 1878.8 <sup>a</sup> | 1880.4 | 1880.4  | 1882.7 | 1873.2 | 1873.2  | 1877.4 |
| gdb 198 | 1864.5 <sup>a</sup> | 1862.4 | 1862.4  | 1862.8 | 1856.9 | 1856.9  | 1857.6 |
| gdb 199 | 1866.6 <sup>a</sup> | 1864.3 | 1864.3  | 1865.3 | 1859.1 | 1859.0  | 1859.9 |
| gdb 200 | 1871.2 <sup>a</sup> | 1870.2 | 1870.2  | 1873.4 | 1864.7 | 1864.7  | 1869.4 |
| gdb 201 | 1865.3 <sup>a</sup> | 1864.4 | 1864.4  | 1867.9 | 1860.9 | 1860.9  | 1865.3 |
| gdb 202 | 1864.4 <sup>a</sup> | 1861.4 | 1861.4  | 1865.0 | 1859.7 | 1859.7  | 1863.6 |
| gdb 203 | 1877.3 <sup>a</sup> | 1876.6 | 1876.6  | 1878.3 | 1870.1 | 1870.1  | 1873.2 |
| gdb 204 | 1887.3 <sup>a</sup> | 1893.7 | 1893.7  | 1898.6 | 1887.5 | 1887.5  | 1891.7 |
| gdb 205 | 1895.1 <sup>a</sup> | 1902.2 | 1902.2  | 1906.2 | 1893.8 | 1893.8  | 1899.0 |
| gdb 206 | 1896.2 <sup>a</sup> | 1904.2 | 1904.2  | 1907.9 | 1895.5 | 1895.4  | 1899.5 |
| gdb 207 | 1895.8 <sup>a</sup> | 1901.2 | 1901.2  | 1904.9 | 1892.8 | 1892.7  | 1898.1 |
| gdb 208 | 1890.0 <sup>a</sup> | 1895.8 | 1895.8  | 1900.9 | 1890.0 | 1890.0  | 1894.8 |
| gdb 209 | 1896.6 <sup>a</sup> | 1894.1 | 1894.1  | 1897.7 | 1888.9 | 1888.9  | 1892.1 |
| gdb 210 | 1891.9 <sup>a</sup> | 1890.4 | 1890.4  | 1894.2 | 1885.4 | 1885.4  | 1889.6 |
| gdb 211 | 1891.5 <sup>a</sup> | 1897.4 | 1897.4  | 1899.4 | 1889.0 | 1889.0  | 1891.8 |
| gdb 212 | 1892.0 <sup>a</sup> | 1897.1 | 1897.1  | 1899.3 | 1889.1 | 1889.1  | 1892.1 |
| gdb 213 | 1886.4 <sup>a</sup> | 1888.4 | 1888.4  | 1891.0 | 1881.7 | 1881.7  | 1886.0 |
| gdb 214 | 1890.2 <sup>a</sup> | 1894.4 | 1894.4  | 1897.4 | 1887.2 | 1887.2  | 1891.1 |
| gdb 215 | 1882.7 <sup>a</sup> | 1884.9 | 1884.9  | 1888.4 | 1880.4 | 1880.4  | 1884.2 |
| gdb 216 | 1890.9 <sup>a</sup> | 1889.9 | 1889.9  | 1889.2 | 1882.3 | 1882.3  | 1880.9 |
| gdb 217 | 1892.1 <sup>a</sup> | 1889.9 | 1889.9  | 1889.6 | 1882.8 | 1882.8  | 1882.3 |
| gdb 218 | 1890.5 <sup>a</sup> | 1889.4 | 1889.4  | 1889.0 | 1881.9 | 1881.9  | 1881.1 |
| gdb 219 | 1887.7 <sup>a</sup> | 1889.9 | 1889.9  | 1894.8 | 1883.7 | 1883.7  | 1888.5 |
| gdb 220 | 1891.9 <sup>a</sup> | 1897.2 | 1897.2  | 1901.0 | 1888.6 | 1888.6  | 1894.1 |
| gdb 221 | 1891.3 <sup>a</sup> | 1896.4 | 1896.4  | 1900.2 | 1888.1 | 1888.1  | 1892.9 |
| gdb 222 | 1891.9 <sup>a</sup> | 1889.2 | 1889.2  | 1892.6 | 1883.1 | 1883.1  | 1886.5 |
| gdb 223 | 1891.2 <sup>a</sup> | 1890.5 | 1890.5  | 1893.4 | 1884.9 | 1884.9  | 1888.3 |
| gdb 224 | 1900.2 <sup>a</sup> | 1904.5 | 1904.5  | 1907.2 | 1894.5 | 1894.5  | 1899.1 |
| gdb 225 | 1892.6 <sup>a</sup> | 1895.9 | 1895.9  | 1899.1 | 1888.3 | 1888.3  | 1891.8 |
| gdb 226 | 1902.4 <sup>a</sup> | 1909.0 | 1909.0  | 1910.1 | 1897.8 | 1897.8  | 1900.3 |
| gdb 227 | 1894.9 <sup>a</sup> | 1899.0 | 1899.0  | 1902.0 | 1891.7 | 1891.7  | 1894.8 |
| gdb 228 | 1900.3 <sup>a</sup> | 1902.6 | 1902.6  | 1905.5 | 1895.2 | 1895.2  | 1898.1 |
| gdb 229 | 1865.8 <sup>a</sup> | 1863.3 | 1863.3  | 1865.6 | 1859.6 | 1859.5  | 1863.0 |
| gdb 230 | 1859.9 <sup>a</sup> | 1865.0 | 1865.0  | 1869.5 | 1861.3 | 1861.3  | 1865.5 |
| gdb 231 | 1864.9 <sup>a</sup> | 1854.0 | 1854.0  | 1853.5 | 1848.4 | 1848.3  | 1847.7 |
| gdb 232 | 1870.5 <sup>a</sup> | 1876.8 | 1876.8  | 1881.6 | 1868.1 | 1868.1  | 1874.4 |
| gdb 233 | 1871.3 <sup>a</sup> | 1867.0 | 1867.0  | 1871.1 | 1862.3 | 1862.2  | 1867.0 |
| gdb 234 | 1872.8 <sup>a</sup> | 1869.9 | 1869.9  | 1874.4 | 1864.9 | 1864.9  | 1869.7 |
| gdb 235 | 1885.5 <sup>a</sup> | 1881.5 | 1881.5  | 1885.8 | 1873.0 | 1873.0  | 1879.6 |
| gdb 236 | 1878.8 <sup>a</sup> | 1875.0 | 1875.0  | 1877.9 | 1869.4 | 1869.4  | 1872.2 |
| gdb 237 | 1880.4 <sup>a</sup> | 1874.2 | 1874.2  | 1876.9 | 1868.6 | 1868.6  | 1871.6 |
| gdb 238 | 1881.0 <sup>a</sup> | 1873.5 | 1873.5  | 1876.6 | 1867.5 | 1867.5  | 1870.0 |
| gdb 239 | 1881.2 <sup>a</sup> | 1875.3 | 1875.2  | 1879.6 | 1870.0 | 1870.0  | 1874.5 |
| gdb 240 | 1878.3 <sup>a</sup> | 1872.4 | 1872.4  | 1876.6 | 1867.4 | 1867.4  | 1872.1 |
| gdb 241 | 1886.5 <sup>a</sup> | 1880.8 | 1880.8  | 1884.7 | 1873.8 | 1873.7  | 1878.6 |
| gdb 242 | 1889.0 <sup>a</sup> | 1898.4 | 1898.4  | 1900.4 | 1890.5 | 1890.5  | 1893.6 |
| gdb 243 | 1885.1 <sup>a</sup> | 1890.7 | 1890.7  | 1894.1 | 1886.7 | 1886.7  | 1889.7 |
| gdb 244 | 1881.3 <sup>a</sup> | 1887.3 | 1887.3  | 1890.6 | 1883.3 | 1883.3  | 1886.6 |
| gdb 245 | 1888.9 <sup>a</sup> | 1893.9 | 1893.9  | 1896.5 | 1887.6 | 1887.6  | 1891.3 |
| gdb 246 | 1889.6 <sup>a</sup> | 1892.3 | 1892.3  | 1891.7 | 1885.5 | 1885.5  | 1884.4 |
| gdb 247 | 1890.0 <sup>a</sup> | 1891.3 | 1891.3  | 1890.5 | 1884.3 | 1884.3  | 1882.8 |
| gdb 248 | 1888.8 <sup>a</sup> | 1889.1 | 1889.1  | 1888.2 | 1882.6 | 1882.5  | 1881.4 |
| gdb 249 | 1867.5 <sup>a</sup> | 1860.5 | 1860.5  | 1863.4 | 1854.3 | 1854.3  | 1859.8 |
| gdb 250 | 1864.0 <sup>a</sup> | 1857.3 | 1857.3  | 1861.1 | 1853.9 | 1853.9  | 1858.4 |
| gdb 251 | 1868.3 <sup>a</sup> | 1864.9 | 1864.9  | 1867.1 | 1857.6 | 1857.6  | 1862.8 |
| gdb 252 | 1869.5 <sup>a</sup> | 1862.3 | 1862.3  | 1862.6 | 1855.9 | 1855.9  | 1856.0 |
| gdb 253 | 1863.7 <sup>a</sup> | 1858.7 | 1858.7  | 1859.0 | 1852.5 | 1852.5  | 1852.5 |
| gdb 254 | 1862.7 <sup>a</sup> | 1857.6 | 1857.6  | 1857.9 | 1851.2 | 1851.2  | 1851.2 |
| gdb 255 | 1862.4 <sup>a</sup> | 1849.7 | 1849.7  | 1853.2 | 1848.0 | 1848.0  | 1851.6 |
| gdb 256 | 1862.6 <sup>a</sup> | 1851.2 | 1851.2  | 1854.2 | 1848.7 | 1848.7  | 1852.4 |
| gdb 257 | 1862.7 <sup>a</sup> | 1850.6 | 1850.6  | 1853.8 | 1848.0 | 1848.0  | 1851.7 |

... continued on next page ...



Table S73: ... continued from previous page ...

| Species | Ref.                | OM2    | OM2-D3T | ODM2   | OM3    | OM3-D3T | ODM3   |
|---------|---------------------|--------|---------|--------|--------|---------|--------|
| gdb 258 | 1876.2 <sup>a</sup> | 1871.6 | 1871.6  | 1875.6 | 1863.7 | 1863.7  | 1868.8 |
| gdb 259 | 1869.2 <sup>a</sup> | 1865.2 | 1865.2  | 1869.6 | 1860.7 | 1860.7  | 1864.8 |
| gdb 260 | 1867.4 <sup>a</sup> | 1864.1 | 1864.1  | 1868.1 | 1859.4 | 1859.4  | 1863.8 |
| gdb 261 | 1870.1 <sup>a</sup> | 1866.6 | 1866.6  | 1870.5 | 1861.3 | 1861.3  | 1865.2 |
| gdb 262 | 1869.0 <sup>a</sup> | 1865.5 | 1865.5  | 1869.2 | 1860.9 | 1860.9  | 1865.1 |
| gdb 263 | 1869.4 <sup>a</sup> | 1865.6 | 1865.6  | 1869.7 | 1860.5 | 1860.5  | 1864.5 |
| gdb 264 | 1877.6 <sup>a</sup> | 1872.5 | 1872.5  | 1874.7 | 1865.9 | 1865.8  | 1867.8 |
| gdb 265 | 1876.3 <sup>a</sup> | 1872.4 | 1872.4  | 1874.3 | 1866.0 | 1865.9  | 1868.0 |
| gdb 266 | 1843.2 <sup>a</sup> | 1827.9 | 1827.9  | 1831.0 | 1825.1 | 1825.1  | 1828.0 |
| gdb 267 | 1841.3 <sup>a</sup> | 1825.0 | 1825.0  | 1828.0 | 1822.6 | 1822.6  | 1825.7 |
| gdb 268 | 1841.4 <sup>a</sup> | 1826.8 | 1826.8  | 1829.6 | 1824.0 | 1824.0  | 1827.0 |
| gdb 269 | 1838.5 <sup>a</sup> | 1823.8 | 1823.8  | 1826.5 | 1821.1 | 1821.1  | 1824.6 |
| gdb 270 | 1848.6 <sup>a</sup> | 1839.1 | 1839.1  | 1839.0 | 1832.1 | 1832.1  | 1831.0 |
| gdb 271 | 1846.8 <sup>a</sup> | 1836.3 | 1836.3  | 1836.3 | 1829.5 | 1829.5  | 1829.1 |
| gdb 272 | 1868.2 <sup>a</sup> | 1869.0 | 1869.0  | 1871.5 | 1863.5 | 1863.5  | 1866.1 |
| gdb 273 | 1865.3 <sup>a</sup> | 1865.0 | 1865.0  | 1868.1 | 1860.6 | 1860.6  | 1863.6 |
| gdb 274 | 1861.3 <sup>a</sup> | 1861.6 | 1861.5  | 1864.5 | 1857.1 | 1857.1  | 1860.6 |
| gdb 275 | 1871.5 <sup>a</sup> | 1873.2 | 1873.2  | 1872.9 | 1864.9 | 1864.9  | 1863.8 |
| gdb 276 | 1874.6 <sup>a</sup> | 1868.9 | 1868.9  | 1867.9 | 1861.5 | 1861.5  | 1859.7 |
| gdb 277 | 1870.0 <sup>a</sup> | 1864.6 | 1864.6  | 1863.6 | 1857.5 | 1857.4  | 1856.4 |
| gdb 278 | 1863.1 <sup>a</sup> | 1862.7 | 1862.7  | 1863.6 | 1855.6 | 1855.6  | 1856.0 |
| gdb 279 | 1868.8 <sup>a</sup> | 1860.8 | 1860.8  | 1859.9 | 1854.3 | 1854.3  | 1852.9 |
| gdb 280 | 1862.4 <sup>a</sup> | 1859.7 | 1859.7  | 1862.6 | 1855.3 | 1855.3  | 1858.8 |
| gdb 281 | 1859.6 <sup>a</sup> | 1856.3 | 1856.3  | 1855.3 | 1850.8 | 1850.8  | 1849.6 |
| gdb 282 | 1855.0 <sup>a</sup> | 1852.3 | 1852.3  | 1854.0 | 1850.8 | 1850.8  | 1854.1 |
| gdb 283 | 1870.0 <sup>a</sup> | 1859.9 | 1859.9  | 1855.9 | 1852.9 | 1852.9  | 1847.7 |
| gdb 284 | 1880.8 <sup>a</sup> | 1882.4 | 1882.4  | 1883.9 | 1875.5 | 1875.5  | 1878.5 |
| gdb 285 | 1877.0 <sup>a</sup> | 1876.9 | 1876.9  | 1878.9 | 1870.0 | 1870.0  | 1874.3 |
| gdb 286 | 1881.2 <sup>a</sup> | 1883.7 | 1883.7  | 1885.7 | 1877.0 | 1876.9  | 1880.7 |
| gdb 287 | 1869.2 <sup>a</sup> | 1868.6 | 1868.6  | 1871.9 | 1865.4 | 1865.4  | 1869.4 |
| gdb 288 | 1871.0 <sup>a</sup> | 1868.6 | 1868.6  | 1871.5 | 1865.3 | 1865.3  | 1869.4 |
| gdb 289 | 1872.4 <sup>a</sup> | 1871.4 | 1871.4  | 1873.4 | 1867.5 | 1867.5  | 1870.2 |
| gdb 290 | 1867.4 <sup>a</sup> | 1863.8 | 1863.8  | 1867.0 | 1861.9 | 1861.9  | 1866.0 |
| gdb 291 | 1871.0 <sup>a</sup> | 1867.6 | 1867.6  | 1868.1 | 1861.8 | 1861.8  | 1862.2 |
| gdb 292 | 1871.3 <sup>a</sup> | 1866.6 | 1866.6  | 1866.5 | 1860.9 | 1860.9  | 1860.7 |
| gdb 293 | 1886.9 <sup>a</sup> | 1899.9 | 1899.9  | 1904.1 | 1894.3 | 1894.3  | 1898.4 |
| gdb 294 | 1892.0 <sup>a</sup> | 1903.9 | 1903.9  | 1907.0 | 1896.0 | 1896.0  | 1900.5 |
| gdb 295 | 1888.8 <sup>a</sup> | 1899.6 | 1899.6  | 1903.8 | 1893.7 | 1893.6  | 1897.9 |
| gdb 296 | 1893.2 <sup>a</sup> | 1895.0 | 1894.9  | 1898.3 | 1890.4 | 1890.4  | 1893.7 |
| gdb 297 | 1887.1 <sup>a</sup> | 1889.5 | 1889.5  | 1894.4 | 1883.4 | 1883.4  | 1888.4 |
| gdb 298 | 1891.7 <sup>a</sup> | 1894.9 | 1894.9  | 1898.4 | 1886.3 | 1886.3  | 1891.6 |
| gdb 299 | 1883.5 <sup>a</sup> | 1885.7 | 1885.7  | 1890.5 | 1879.6 | 1879.6  | 1884.6 |
| gdb 300 | 1884.7 <sup>a</sup> | 1888.3 | 1888.3  | 1892.9 | 1882.4 | 1882.4  | 1887.1 |
| gdb 301 | 1883.9 <sup>a</sup> | 1883.6 | 1883.6  | 1886.8 | 1877.8 | 1877.8  | 1880.8 |
| gdb 302 | 1888.9 <sup>a</sup> | 1887.6 | 1887.6  | 1891.2 | 1881.5 | 1881.5  | 1884.8 |
| gdb 303 | 1887.8 <sup>a</sup> | 1887.3 | 1887.3  | 1890.3 | 1881.6 | 1881.6  | 1884.6 |
| gdb 304 | 1868.0 <sup>a</sup> | 1865.3 | 1865.3  | 1868.7 | 1860.6 | 1860.6  | 1864.1 |
| gdb 305 | 1866.0 <sup>a</sup> | 1862.4 | 1862.4  | 1864.9 | 1858.6 | 1858.6  | 1862.1 |
| gdb 306 | 1864.3 <sup>a</sup> | 1861.9 | 1861.9  | 1864.6 | 1858.2 | 1858.2  | 1861.7 |
| gdb 307 | 1870.5 <sup>a</sup> | 1868.4 | 1868.4  | 1869.1 | 1861.1 | 1861.1  | 1861.2 |
| gdb 308 | 1872.1 <sup>a</sup> | 1866.0 | 1866.0  | 1865.3 | 1859.5 | 1859.5  | 1858.5 |
| gdb 309 | 1872.1 <sup>a</sup> | 1866.7 | 1866.7  | 1866.1 | 1860.6 | 1860.5  | 1859.8 |
| gdb 310 | 1884.7 <sup>a</sup> | 1889.6 | 1889.6  | 1891.8 | 1883.9 | 1883.9  | 1887.2 |
| gdb 311 | 1882.2 <sup>a</sup> | 1886.7 | 1886.7  | 1889.5 | 1883.7 | 1883.7  | 1886.7 |
| gdb 312 | 1881.8 <sup>a</sup> | 1888.4 | 1888.4  | 1891.1 | 1883.9 | 1883.9  | 1887.1 |
| gdb 313 | 1890.3 <sup>a</sup> | 1893.0 | 1893.0  | 1895.0 | 1886.4 | 1886.4  | 1890.1 |
| gdb 314 | 1879.3 <sup>a</sup> | 1881.2 | 1881.2  | 1884.2 | 1878.9 | 1878.9  | 1882.0 |
| gdb 315 | 1878.5 <sup>a</sup> | 1883.8 | 1883.8  | 1886.7 | 1879.8 | 1879.8  | 1883.4 |
| gdb 316 | 1880.4 <sup>a</sup> | 1885.8 | 1885.6  | 1888.8 | 1881.9 | 1881.9  | 1885.3 |
| gdb 317 | 1887.6 <sup>a</sup> | 1889.0 | 1889.0  | 1888.3 | 1882.7 | 1882.6  | 1881.3 |
| gdb 318 | 1885.0 <sup>a</sup> | 1886.8 | 1886.8  | 1886.2 | 1880.3 | 1880.3  | 1879.4 |
| gdb 319 | 1886.7 <sup>a</sup> | 1888.1 | 1888.1  | 1887.6 | 1881.7 | 1881.7  | 1880.6 |
| gdb 320 | 1857.6 <sup>a</sup> | 1857.7 | 1857.7  | 1860.9 | 1854.9 | 1854.9  | 1859.7 |
| gdb 321 | 1848.2 <sup>a</sup> | 1839.0 | 1839.0  | 1841.2 | 1834.2 | 1834.1  | 1835.7 |
| gdb 322 | 1848.4 <sup>a</sup> | 1838.5 | 1838.5  | 1839.6 | 1833.0 | 1833.0  | 1834.0 |

... continued on next page ...

Table S73: ... continued from previous page ...

| Species | Ref.                | OM2    | OM2-D3T | ODM2   | OM3    | OM3-D3T | ODM3   |
|---------|---------------------|--------|---------|--------|--------|---------|--------|
| gdb 323 | 1847.8 <sup>a</sup> | 1841.1 | 1841.1  | 1844.4 | 1838.4 | 1838.4  | 1841.9 |
| gdb 324 | 1846.6 <sup>a</sup> | 1836.1 | 1836.1  | 1839.2 | 1835.1 | 1835.1  | 1838.4 |
| gdb 325 | 1851.3 <sup>a</sup> | 1847.5 | 1847.5  | 1851.1 | 1842.1 | 1842.1  | 1848.0 |
| gdb 326 | 1865.0 <sup>a</sup> | 1862.3 | 1862.3  | 1866.6 | 1857.1 | 1857.0  | 1861.7 |
| gdb 327 | 1861.4 <sup>a</sup> | 1858.7 | 1858.7  | 1863.1 | 1853.8 | 1853.8  | 1858.1 |
| gdb 328 | 1861.7 <sup>a</sup> | 1868.4 | 1868.4  | 1873.8 | 1859.6 | 1859.6  | 1866.2 |
| gdb 329 | 1870.1 <sup>a</sup> | 1861.5 | 1861.5  | 1865.1 | 1856.6 | 1856.6  | 1859.7 |
| gdb 330 | 1859.9 <sup>a</sup> | 1857.1 | 1857.1  | 1856.6 | 1850.6 | 1850.6  | 1849.7 |
| gdb 331 | 1860.6 <sup>a</sup> | 1856.1 | 1856.0  | 1855.2 | 1850.7 | 1850.7  | 1850.3 |
| gdb 332 | 1859.1 <sup>a</sup> | 1857.7 | 1857.7  | 1859.6 | 1852.3 | 1852.3  | 1856.6 |
| gdb 333 | 1870.1 <sup>a</sup> | 1862.5 | 1862.5  | 1858.6 | 1854.0 | 1854.0  | 1848.7 |
| gdb 334 | 1864.1 <sup>a</sup> | 1858.1 | 1858.1  | 1862.0 | 1855.5 | 1855.5  | 1859.3 |
| gdb 335 | 1864.1 <sup>a</sup> | 1857.1 | 1857.1  | 1860.3 | 1854.4 | 1854.4  | 1858.1 |
| gdb 336 | 1864.1 <sup>a</sup> | 1861.2 | 1861.2  | 1863.6 | 1856.7 | 1856.7  | 1859.9 |
| gdb 337 | 1862.9 <sup>a</sup> | 1854.2 | 1854.2  | 1857.1 | 1852.7 | 1852.7  | 1856.2 |
| gdb 338 | 1847.1 <sup>a</sup> | 1841.9 | 1841.9  | 1844.7 | 1838.5 | 1838.5  | 1841.7 |
| gdb 339 | 1865.7 <sup>a</sup> | 1867.2 | 1867.2  | 1870.3 | 1860.7 | 1860.7  | 1866.0 |
| gdb 340 | 1861.1 <sup>a</sup> | 1857.0 | 1857.0  | 1857.3 | 1849.8 | 1849.8  | 1849.7 |
| gdb 341 | 1870.1 <sup>a</sup> | 1865.9 | 1865.9  | 1866.3 | 1859.0 | 1859.0  | 1859.1 |
| gdb 342 | 1871.5 <sup>a</sup> | 1862.2 | 1862.2  | 1861.3 | 1856.0 | 1856.0  | 1854.5 |
| gdb 343 | 1865.8 <sup>a</sup> | 1860.9 | 1860.9  | 1860.5 | 1854.9 | 1854.9  | 1854.6 |
| gdb 344 | 1891.7 <sup>a</sup> | 1893.0 | 1893.0  | 1896.0 | 1885.2 | 1885.2  | 1891.6 |
| gdb 345 | 1886.8 <sup>a</sup> | 1889.2 | 1889.2  | 1893.8 | 1884.1 | 1884.1  | 1889.8 |
| gdb 346 | 1887.9 <sup>a</sup> | 1891.5 | 1891.5  | 1895.1 | 1885.9 | 1885.9  | 1890.9 |
| gdb 347 | 1896.2 <sup>a</sup> | 1899.7 | 1899.7  | 1903.3 | 1892.4 | 1892.4  | 1897.9 |
| gdb 348 | 1869.6 <sup>a</sup> | 1865.5 | 1865.5  | 1868.1 | 1860.6 | 1860.6  | 1866.1 |
| gdb 349 | 1869.8 <sup>a</sup> | 1864.7 | 1864.7  | 1864.9 | 1858.7 | 1858.7  | 1859.5 |
| gdb 350 | 1866.3 <sup>a</sup> | 1863.5 | 1863.5  | 1863.2 | 1856.9 | 1856.9  | 1857.3 |
| gdb 351 | 1896.0 <sup>a</sup> | 1897.3 | 1897.3  | 1899.2 | 1889.7 | 1889.7  | 1895.4 |
| gdb 352 | 1890.6 <sup>a</sup> | 1892.5 | 1892.5  | 1895.7 | 1887.3 | 1887.2  | 1891.9 |
| gdb 353 | 1895.8 <sup>a</sup> | 1896.7 | 1896.7  | 1898.5 | 1888.7 | 1888.7  | 1894.4 |
| gdb 354 | 1866.6 <sup>a</sup> | 1871.1 | 1871.1  | 1873.2 | 1866.6 | 1866.6  | 1869.6 |
| gdb 355 | 1831.3 <sup>a</sup> | 1813.0 | 1813.5  | 1815.8 | 1808.8 | 1808.8  | 1809.7 |
| gdb 356 | 1829.9 <sup>a</sup> | 1811.3 | 1811.3  | 1813.5 | 1807.0 | 1806.9  | 1808.2 |
| gdb 357 | 1870.4 <sup>a</sup> | 1872.1 | 1872.1  | 1875.1 | 1867.3 | 1867.3  | 1871.0 |
| gdb 358 | 1868.1 <sup>a</sup> | 1869.3 | 1869.3  | 1872.0 | 1864.4 | 1864.4  | 1868.4 |
| gdb 359 | 1827.4 <sup>a</sup> | 1811.2 | 1811.2  | 1813.7 | 1806.9 | 1806.9  | 1808.4 |
| gdb 360 | 1824.9 <sup>a</sup> | 1809.0 | 1809.0  | 1811.5 | 1804.9 | 1804.9  | 1806.6 |
| gdb 361 | 1839.8 <sup>a</sup> | 1825.7 | 1824.5  | 1827.8 | 1823.5 | 1821.9  | 1825.3 |
| gdb 362 | 1837.1 <sup>a</sup> | 1822.5 | 1822.5  | 1825.8 | 1820.2 | 1820.2  | 1823.8 |
| gdb 363 | 1872.5 <sup>a</sup> | 1872.7 | 1872.7  | 1875.9 | 1867.6 | 1867.5  | 1871.4 |
| gdb 364 | 1869.7 <sup>a</sup> | 1870.0 | 1870.0  | 1873.1 | 1865.2 | 1865.2  | 1869.5 |
| gdb 365 | 1861.1 <sup>a</sup> | 1866.5 | 1866.5  | 1870.1 | 1858.3 | 1858.3  | 1863.0 |
| gdb 366 | 1860.8 <sup>a</sup> | 1858.9 | 1858.9  | 1861.3 | 1853.6 | 1853.6  | 1856.0 |
| gdb 367 | 1863.2 <sup>a</sup> | 1860.8 | 1860.8  | 1861.2 | 1853.6 | 1853.5  | 1853.7 |
| gdb 368 | 1861.5 <sup>a</sup> | 1861.4 | 1861.4  | 1861.7 | 1853.9 | 1853.8  | 1853.2 |
| gdb 369 | 1865.3 <sup>a</sup> | 1860.8 | 1860.8  | 1859.3 | 1852.7 | 1852.7  | 1850.1 |
| gdb 370 | 1876.1 <sup>a</sup> | 1878.5 | 1878.5  | 1881.4 | 1872.8 | 1872.8  | 1875.5 |
| gdb 371 | 1882.0 <sup>a</sup> | 1884.7 | 1884.7  | 1886.6 | 1876.3 | 1876.3  | 1879.8 |
| gdb 372 | 1880.4 <sup>a</sup> | 1878.1 | 1878.1  | 1877.7 | 1870.3 | 1870.2  | 1869.2 |
| gdb 373 | 1848.3 <sup>a</sup> | 1840.7 | 1840.7  | 1843.6 | 1837.5 | 1837.4  | 1839.9 |
| gdb 374 | 1852.5 <sup>a</sup> | 1850.8 | 1850.8  | 1850.9 | 1843.7 | 1843.7  | 1842.7 |
| gdb 375 | 1848.0 <sup>a</sup> | 1846.5 | 1846.5  | 1846.1 | 1839.3 | 1839.3  | 1838.7 |
| gdb 376 | 1872.3 <sup>a</sup> | 1866.4 | 1866.4  | 1865.5 | 1858.6 | 1858.6  | 1857.2 |
| gdb 377 | 1885.0 <sup>a</sup> | 1891.5 | 1891.5  | 1892.9 | 1882.0 | 1882.0  | 1884.2 |
| gdb 378 | 1885.2 <sup>a</sup> | 1891.6 | 1891.6  | 1893.2 | 1882.4 | 1882.3  | 1884.7 |
| gdb 379 | 1885.1 <sup>a</sup> | 1884.9 | 1884.8  | 1887.3 | 1878.1 | 1878.0  | 1881.7 |
| gdb 380 | 1885.8 <sup>a</sup> | 1889.4 | 1889.4  | 1891.1 | 1881.8 | 1881.8  | 1883.7 |
| gdb 381 | 1879.0 <sup>a</sup> | 1879.1 | 1879.1  | 1882.2 | 1874.6 | 1874.6  | 1877.3 |
| gdb 382 | 1884.1 <sup>a</sup> | 1882.4 | 1882.4  | 1882.3 | 1874.5 | 1874.5  | 1874.1 |
| gdb 383 | 1886.3 <sup>a</sup> | 1887.0 | 1887.0  | 1885.9 | 1878.2 | 1878.2  | 1876.0 |
| gdb 384 | 1882.3 <sup>a</sup> | 1880.5 | 1880.5  | 1880.1 | 1872.3 | 1872.3  | 1871.6 |
| gdb 385 | 1869.0 <sup>a</sup> | 1867.4 | 1867.3  | 1870.8 | 1864.1 | 1864.0  | 1867.0 |
| gdb 386 | 1871.8 <sup>a</sup> | 1868.9 | 1868.9  | 1868.0 | 1862.3 | 1862.2  | 1861.1 |
| gdb 387 | 1869.6 <sup>a</sup> | 1878.7 | 1878.7  | 1881.8 | 1870.2 | 1870.2  | 1873.9 |

... continued on next page ...

Table S73: ... continued from previous page ...

| Species | Ref.                | OM2    | OM2-D3T | ODM2   | OM3    | OM3-D3T | ODM3   |
|---------|---------------------|--------|---------|--------|--------|---------|--------|
| gdb 388 | 1869.9 <sup>a</sup> | 1866.7 | 1866.7  | 1870.1 | 1863.4 | 1863.3  | 1865.7 |
| gdb 389 | 1863.7 <sup>a</sup> | 1862.6 | 1862.6  | 1862.6 | 1865.6 | 1859.8  | 1862.6 |
| gdb 390 | 1868.6 <sup>a</sup> | 1871.8 | 1871.8  | 1871.8 | 1864.0 | 1864.0  | 1862.8 |
| gdb 391 | 1869.0 <sup>a</sup> | 1870.1 | 1870.1  | 1869.9 | 1862.9 | 1862.9  | 1862.1 |
| gdb 392 | 1869.8 <sup>a</sup> | 1873.2 | 1873.2  | 1873.4 | 1865.9 | 1865.8  | 1865.0 |
| gdb 393 | 1847.1 <sup>a</sup> | 1843.4 | 1843.4  | 1845.6 | 1837.9 | 1837.9  | 1840.0 |
| gdb 394 | 1849.3 <sup>a</sup> | 1841.7 | 1841.7  | 1844.6 | 1837.8 | 1837.8  | 1839.9 |
| gdb 395 | 1844.4 <sup>a</sup> | 1837.3 | 1837.3  | 1839.8 | 1834.0 | 1834.0  | 1836.7 |
| gdb 396 | 1854.8 <sup>a</sup> | 1851.4 | 1851.4  | 1851.4 | 1843.4 | 1843.4  | 1841.8 |
| gdb 397 | 1848.4 <sup>a</sup> | 1846.5 | 1846.5  | 1846.1 | 1838.8 | 1838.8  | 1837.7 |
| gdb 398 | 1852.6 <sup>a</sup> | 1850.0 | 1850.0  | 1849.5 | 1841.5 | 1841.4  | 1839.5 |
| gdb 399 | 1864.2 <sup>a</sup> | 1865.3 | 1865.3  | 1864.0 | 1859.6 | 1859.6  | 1857.6 |
| gdb 400 | 1869.4 <sup>a</sup> | 1868.8 | 1868.8  | 1863.9 | 1860.0 | 1860.0  | 1853.9 |
| gdb 401 | 1865.5 <sup>a</sup> | 1860.2 | 1860.2  | 1862.8 | 1855.7 | 1855.7  | 1858.1 |
| gdb 402 | 1870.7 <sup>a</sup> | 1864.6 | 1864.6  | 1863.7 | 1856.5 | 1856.5  | 1854.6 |
| gdb 403 | 1865.2 <sup>a</sup> | 1864.5 | 1864.5  | 1865.3 | 1856.4 | 1856.3  | 1856.5 |
| gdb 404 | 1868.0 <sup>a</sup> | 1862.2 | 1862.2  | 1861.0 | 1856.8 | 1856.8  | 1855.6 |
| gdb 405 | 1856.0 <sup>a</sup> | 1854.0 | 1854.0  | 1856.9 | 1851.8 | 1851.8  | 1855.1 |
| gdb 406 | 1876.2 <sup>a</sup> | 1867.3 | 1867.3  | 1862.9 | 1859.2 | 1859.2  | 1853.6 |
| gdb 407 | 1864.1 <sup>a</sup> | 1860.4 | 1860.4  | 1859.1 | 1854.7 | 1854.6  | 1853.4 |
| gdb 408 | 1867.6 <sup>a</sup> | 1868.1 | 1868.1  | 1871.5 | 1862.9 | 1862.9  | 1865.9 |
| gdb 409 | 1867.4 <sup>a</sup> | 1863.7 | 1863.7  | 1866.5 | 1860.4 | 1860.4  | 1863.2 |
| gdb 410 | 1867.7 <sup>a</sup> | 1863.9 | 1863.9  | 1866.9 | 1860.7 | 1860.7  | 1863.7 |
| gdb 411 | 1871.7 <sup>a</sup> | 1867.5 | 1867.5  | 1866.7 | 1860.5 | 1860.5  | 1859.0 |
| gdb 412 | 1872.9 <sup>a</sup> | 1868.1 | 1868.1  | 1867.3 | 1861.4 | 1861.4  | 1860.2 |
| gdb 413 | 1867.5 <sup>a</sup> | 1873.5 | 1873.4  | 1873.7 | 1865.5 | 1865.5  | 1864.8 |
| gdb 414 | 1863.2 <sup>a</sup> | 1865.8 | 1865.8  | 1864.6 | 1858.1 | 1858.1  | 1856.2 |
| gdb 415 | 1864.6 <sup>a</sup> | 1864.3 | 1864.3  | 1863.2 | 1858.4 | 1858.4  | 1856.2 |
| gdb 416 | 1862.2 <sup>a</sup> | 1865.2 | 1865.2  | 1866.8 | 1859.7 | 1859.7  | 1861.9 |
| gdb 417 | 1869.9 <sup>a</sup> | 1868.1 | 1868.1  | 1863.5 | 1858.8 | 1858.7  | 1852.5 |
| gdb 418 | 1867.0 <sup>a</sup> | 1862.5 | 1862.5  | 1861.3 | 1855.4 | 1855.4  | 1854.3 |
| gdb 419 | 1868.1 <sup>a</sup> | 1861.7 | 1861.7  | 1860.4 | 1856.2 | 1856.2  | 1854.7 |
| gdb 420 | 1865.1 <sup>a</sup> | 1863.9 | 1863.9  | 1865.3 | 1858.3 | 1858.3  | 1861.9 |
| gdb 421 | 1874.7 <sup>a</sup> | 1866.3 | 1866.3  | 1861.6 | 1857.5 | 1857.5  | 1851.5 |
| gdb 422 | 1865.9 <sup>a</sup> | 1862.9 | 1862.9  | 1861.7 | 1856.9 | 1856.9  | 1855.6 |
| gdb 423 | 1866.7 <sup>a</sup> | 1863.6 | 1863.6  | 1862.2 | 1856.5 | 1856.5  | 1855.0 |
| gdb 424 | 1869.8 <sup>a</sup> | 1868.0 | 1868.0  | 1867.2 | 1860.7 | 1860.7  | 1860.6 |
| gdb 425 | 1872.4 <sup>a</sup> | 1871.4 | 1871.4  | 1873.4 | 1864.8 | 1864.8  | 1869.6 |
| gdb 426 | 1871.3 <sup>a</sup> | 1868.1 | 1868.1  | 1867.6 | 1861.1 | 1861.0  | 1861.1 |
| gdb 427 | 1870.3 <sup>a</sup> | 1867.7 | 1867.7  | 1867.3 | 1860.4 | 1860.4  | 1860.2 |
| gdb 428 | 1846.2 <sup>a</sup> | 1840.3 | 1840.3  | 1835.0 | 1830.4 | 1830.4  | 1823.7 |
| gdb 429 | 1847.2 <sup>a</sup> | 1842.2 | 1842.2  | 1837.2 | 1832.1 | 1832.1  | 1824.9 |
| gdb 430 | 1860.6 <sup>a</sup> | 1851.9 | 1851.9  | 1851.7 | 1844.2 | 1844.1  | 1843.1 |
| gdb 431 | 1859.5 <sup>a</sup> | 1850.5 | 1850.5  | 1850.6 | 1843.0 | 1842.9  | 1842.3 |
| gdb 432 | 1863.2 <sup>a</sup> | 1854.6 | 1854.6  | 1852.9 | 1845.9 | 1845.9  | 1842.8 |
| gdb 433 | 1859.5 <sup>a</sup> | 1862.4 | 1862.3  | 1864.0 | 1855.8 | 1855.7  | 1858.3 |
| gdb 434 | 1867.4 <sup>a</sup> | 1864.7 | 1864.7  | 1863.4 | 1857.4 | 1857.4  | 1855.3 |
| gdb 435 | 1864.1 <sup>a</sup> | 1861.0 | 1861.0  | 1859.6 | 1854.8 | 1854.8  | 1852.7 |
| gdb 436 | 1865.6 <sup>a</sup> | 1863.3 | 1863.3  | 1862.0 | 1856.4 | 1856.3  | 1854.8 |
| gdb 437 | 1862.9 <sup>a</sup> | 1860.2 | 1860.2  | 1859.1 | 1853.9 | 1853.9  | 1852.4 |
| gdb 438 | 1872.1 <sup>a</sup> | 1864.8 | 1864.8  | 1860.0 | 1855.7 | 1855.6  | 1849.3 |
| gdb 439 | 1849.1 <sup>a</sup> | 1841.9 | 1841.8  | 1844.8 | 1836.3 | 1836.3  | 1838.5 |
| gdb 440 | 1849.8 <sup>a</sup> | 1845.4 | 1845.4  | 1845.2 | 1837.4 | 1837.4  | 1836.2 |
| gdb 441 | 1848.1 <sup>a</sup> | 1843.7 | 1843.7  | 1843.6 | 1835.9 | 1835.9  | 1835.1 |
| gdb 442 | 1873.1 <sup>a</sup> | 1871.3 | 1871.3  | 1870.1 | 1864.2 | 1864.2  | 1863.5 |
| gdb 443 | 1874.0 <sup>a</sup> | 1871.7 | 1871.7  | 1870.5 | 1864.7 | 1864.7  | 1864.1 |
| gdb 444 | 1857.5 <sup>a</sup> | 1848.8 | 1848.8  | 1849.2 | 1841.8 | 1841.8  | 1841.4 |
| gdb 445 | 1859.5 <sup>a</sup> | 1850.4 | 1850.3  | 1848.8 | 1842.4 | 1842.3  | 1839.9 |
| gdb 446 | 1855.9 <sup>a</sup> | 1859.8 | 1859.8  | 1861.5 | 1852.9 | 1852.9  | 1856.0 |
| gdb 447 | 1860.4 <sup>a</sup> | 1858.3 | 1858.3  | 1857.2 | 1852.7 | 1852.7  | 1851.0 |
| gdb 448 | 1864.1 <sup>a</sup> | 1861.2 | 1861.2  | 1860.0 | 1855.1 | 1855.1  | 1853.6 |
| gdb 449 | 1845.8 <sup>a</sup> | 1839.0 | 1839.0  | 1837.8 | 1831.8 | 1831.7  | 1829.5 |
| gdb 450 | 1843.6 <sup>a</sup> | 1834.5 | 1834.5  | 1833.6 | 1829.7 | 1829.7  | 1828.1 |
| gdb 451 | 1841.2 <sup>a</sup> | 1836.5 | 1836.4  | 1834.9 | 1829.9 | 1829.8  | 1828.0 |
| gdb 452 | 1849.3 <sup>a</sup> | 1845.4 | 1845.3  | 1841.7 | 1835.8 | 1835.7  | 1830.1 |

... continued on next page ...

Table S73: ... continued from previous page ...

| Species | Ref.                | OM2    | OM2-D3T | ODM2   | OM3    | OM3-D3T | ODM3   |
|---------|---------------------|--------|---------|--------|--------|---------|--------|
| gdb 453 | 1845.8 <sup>a</sup> | 1840.6 | 1840.6  | 1835.6 | 1831.3 | 1831.3  | 1824.1 |
| gdb 454 | 1845.3 <sup>a</sup> | 1839.5 | 1839.5  | 1839.5 | 1834.9 | 1831.0  | 1824.5 |
| gdb 455 | 1846.0 <sup>a</sup> | 1838.5 | 1838.5  | 1837.7 | 1833.0 | 1833.0  | 1830.7 |
| gdb 456 | 1848.5 <sup>a</sup> | 1845.5 | 1845.5  | 1841.5 | 1836.2 | 1836.1  | 1830.5 |
| gdb 457 | 1860.9 <sup>a</sup> | 1852.4 | 1852.4  | 1851.3 | 1844.3 | 1844.3  | 1842.0 |
| gdb 458 | 1858.6 <sup>a</sup> | 1850.7 | 1850.7  | 1851.4 | 1843.6 | 1843.6  | 1843.0 |
| gdb 459 | 1860.8 <sup>a</sup> | 1865.1 | 1865.1  | 1867.9 | 1858.5 | 1858.5  | 1860.9 |
| gdb 460 | 1862.3 <sup>a</sup> | 1862.3 | 1862.3  | 1861.5 | 1855.8 | 1855.8  | 1853.8 |
| gdb 461 | 1869.8 <sup>a</sup> | 1863.3 | 1863.3  | 1858.7 | 1854.8 | 1854.8  | 1849.1 |
| gdb 462 | 1847.2 <sup>a</sup> | 1839.5 | 1839.4  | 1842.8 | 1834.3 | 1834.3  | 1837.0 |
| gdb 463 | 1845.6 <sup>a</sup> | 1841.5 | 1841.5  | 1841.8 | 1834.1 | 1834.0  | 1833.6 |
| gdb 464 | 1846.1 <sup>a</sup> | 1841.5 | 1841.5  | 1841.8 | 1834.6 | 1834.6  | 1834.3 |
| gdb 465 | 1847.8 <sup>a</sup> | 1843.6 | 1843.9  | 1844.3 | 1836.5 | 1836.5  | 1835.7 |
| gdb 466 | 1844.5 <sup>a</sup> | 1841.2 | 1841.1  | 1839.6 | 1833.6 | 1833.5  | 1831.0 |
| gdb 467 | 1844.5 <sup>a</sup> | 1836.9 | 1836.9  | 1835.9 | 1831.5 | 1831.5  | 1829.5 |
| gdb 468 | 1846.3 <sup>a</sup> | 1841.3 | 1841.2  | 1839.8 | 1833.3 | 1833.4  | 1830.5 |
| gdb 469 | 1847.8 <sup>a</sup> | 1845.4 | 1845.4  | 1841.5 | 1835.7 | 1835.6  | 1830.2 |
| gdb 470 | 1865.5 <sup>a</sup> | 1865.1 | 1865.1  | 1863.7 | 1857.5 | 1857.4  | 1855.4 |
| gdb 471 | 1869.2 <sup>a</sup> | 1863.2 | 1863.2  | 1858.5 | 1854.3 | 1854.3  | 1848.4 |
| gdb 472 | 1861.2 <sup>a</sup> | 1859.8 | 1859.8  | 1859.0 | 1853.8 | 1853.8  | 1852.3 |
| gdb 473 | 1865.1 <sup>a</sup> | 1865.7 | 1865.7  | 1864.8 | 1858.4 | 1858.4  | 1856.4 |
| gdb 474 | 1873.0 <sup>a</sup> | 1871.5 | 1871.5  | 1870.1 | 1864.2 | 1864.2  | 1863.4 |
| gdb 475 | 1872.0 <sup>a</sup> | 1869.5 | 1869.5  | 1868.7 | 1862.4 | 1862.4  | 1862.0 |
| gdb 476 | 1872.9 <sup>a</sup> | 1871.5 | 1871.5  | 1870.0 | 1864.0 | 1864.0  | 1863.2 |
| gdb 477 | 1861.7 <sup>a</sup> | 1852.6 | 1852.5  | 1856.9 | 1847.4 | 1847.4  | 1851.2 |
| gdb 478 | 1862.7 <sup>a</sup> | 1853.1 | 1853.1  | 1855.6 | 1846.8 | 1846.7  | 1848.5 |
| gdb 479 | 1857.9 <sup>a</sup> | 1849.2 | 1849.2  | 1853.2 | 1844.3 | 1844.3  | 1848.7 |
| gdb 480 | 1860.2 <sup>a</sup> | 1851.4 | 1851.4  | 1853.4 | 1845.5 | 1845.5  | 1847.7 |
| gdb 481 | 1858.8 <sup>a</sup> | 1863.7 | 1863.6  | 1866.3 | 1856.7 | 1856.7  | 1860.6 |
| gdb 482 | 1860.0 <sup>a</sup> | 1853.7 | 1853.7  | 1856.9 | 1851.4 | 1851.4  | 1854.5 |
| gdb 483 | 1862.4 <sup>a</sup> | 1857.6 | 1857.6  | 1860.5 | 1854.9 | 1854.9  | 1858.1 |
| gdb 484 | 1858.7 <sup>a</sup> | 1856.7 | 1856.7  | 1858.9 | 1853.1 | 1853.0  | 1856.1 |
| gdb 485 | 1862.3 <sup>a</sup> | 1859.8 | 1859.8  | 1862.1 | 1855.7 | 1855.7  | 1858.9 |
| gdb 486 | 1865.4 <sup>a</sup> | 1856.5 | 1856.5  | 1859.3 | 1850.4 | 1850.4  | 1852.5 |
| gdb 487 | 1860.9 <sup>a</sup> | 1852.6 | 1852.6  | 1855.1 | 1846.6 | 1846.6  | 1849.2 |
| gdb 488 | 1862.4 <sup>a</sup> | 1854.3 | 1854.3  | 1858.7 | 1849.0 | 1849.0  | 1853.1 |
| gdb 489 | 1853.5 <sup>a</sup> | 1847.3 | 1847.3  | 1851.8 | 1841.7 | 1841.7  | 1845.3 |
| gdb 490 | 1849.1 <sup>a</sup> | 1843.9 | 1843.9  | 1847.9 | 1838.4 | 1838.4  | 1842.3 |
| gdb 491 | 1851.3 <sup>a</sup> | 1846.7 | 1846.7  | 1850.8 | 1841.4 | 1841.4  | 1845.4 |
| gdb 492 | 1850.4 <sup>a</sup> | 1845.8 | 1845.8  | 1849.8 | 1840.4 | 1840.4  | 1844.3 |
| gdb 493 | 1846.2 <sup>a</sup> | 1842.4 | 1842.4  | 1846.2 | 1837.2 | 1837.2  | 1841.6 |
| gdb 494 | 1845.8 <sup>a</sup> | 1842.5 | 1842.5  | 1846.2 | 1837.4 | 1837.3  | 1841.8 |
| gdb 495 | 1875.3 <sup>a</sup> | 1874.0 | 1874.0  | 1876.8 | 1868.7 | 1868.7  | 1872.9 |
| gdb 496 | 1875.4 <sup>a</sup> | 1872.5 | 1872.5  | 1875.5 | 1866.7 | 1866.7  | 1870.8 |
| gdb 497 | 1872.9 <sup>a</sup> | 1870.4 | 1870.4  | 1873.3 | 1864.9 | 1864.9  | 1869.5 |
| gdb 498 | 1875.3 <sup>a</sup> | 1874.5 | 1874.5  | 1877.1 | 1868.7 | 1868.7  | 1872.6 |
| gdb 499 | 1864.5 <sup>a</sup> | 1855.6 | 1855.6  | 1859.7 | 1850.8 | 1850.8  | 1854.4 |
| gdb 500 | 1863.2 <sup>a</sup> | 1852.1 | 1852.1  | 1856.7 | 1847.0 | 1847.0  | 1851.7 |
| gdb 501 | 1860.4 <sup>a</sup> | 1851.9 | 1851.9  | 1856.6 | 1846.8 | 1846.8  | 1851.5 |
| gdb 502 | 1866.1 <sup>a</sup> | 1857.0 | 1857.0  | 1859.3 | 1851.0 | 1851.0  | 1853.3 |
| gdb 503 | 1857.3 <sup>a</sup> | 1851.0 | 1851.0  | 1855.0 | 1845.7 | 1845.7  | 1850.1 |
| gdb 504 | 1855.5 <sup>a</sup> | 1857.9 | 1857.9  | 1862.4 | 1849.5 | 1849.5  | 1855.3 |
| gdb 505 | 1861.3 <sup>a</sup> | 1856.6 | 1856.6  | 1860.0 | 1850.4 | 1850.4  | 1853.9 |
| gdb 506 | 1853.3 <sup>a</sup> | 1846.6 | 1846.6  | 1851.1 | 1841.7 | 1841.7  | 1846.6 |
| gdb 507 | 1853.4 <sup>a</sup> | 1849.1 | 1849.1  | 1853.6 | 1844.1 | 1844.1  | 1848.8 |
| gdb 508 | 1853.7 <sup>a</sup> | 1847.9 | 1847.9  | 1851.9 | 1842.6 | 1842.6  | 1846.9 |
| gdb 509 | 1854.0 <sup>a</sup> | 1846.8 | 1846.8  | 1850.8 | 1841.8 | 1841.8  | 1846.7 |
| gdb 510 | 1854.2 <sup>a</sup> | 1846.7 | 1846.7  | 1850.8 | 1842.1 | 1842.1  | 1846.3 |
| gdb 511 | 1861.8 <sup>a</sup> | 1850.5 | 1850.5  | 1852.9 | 1844.7 | 1844.7  | 1847.1 |
| gdb 512 | 1876.0 <sup>a</sup> | 1873.5 | 1873.5  | 1878.1 | 1868.3 | 1868.3  | 1872.5 |
| gdb 513 | 1887.4 <sup>a</sup> | 1891.0 | 1891.0  | 1893.2 | 1881.2 | 1881.2  | 1884.2 |
| gdb 514 | 1881.2 <sup>a</sup> | 1879.4 | 1879.4  | 1883.1 | 1871.3 | 1871.2  | 1876.1 |
| gdb 515 | 1864.8 <sup>a</sup> | 1866.3 | 1866.3  | 1868.9 | 1857.5 | 1857.5  | 1860.8 |
| gdb 516 | 1853.0 <sup>a</sup> | 1844.4 | 1844.4  | 1848.1 | 1839.9 | 1839.9  | 1843.1 |
| gdb 517 | 1872.9 <sup>a</sup> | 1866.6 | 1866.6  | 1870.3 | 1861.2 | 1861.2  | 1865.0 |

... continued on next page ...

Table S73: ... continued from previous page ...

| Species | Ref.                | OM2    | OM2-D3T | ODM2   | OM3    | OM3-D3T | ODM3   |
|---------|---------------------|--------|---------|--------|--------|---------|--------|
| gdb 518 | 1874.2 <sup>a</sup> | 1867.9 | 1867.9  | 1871.0 | 1862.6 | 1862.6  | 1866.5 |
| gdb 519 | 1881.0 <sup>a</sup> | 1877.7 | 1877.7  | 1879.6 | 1870.9 | 1870.9  | 1873.1 |
| gdb 520 | 1873.3 <sup>a</sup> | 1867.2 | 1867.2  | 1870.6 | 1862.1 | 1862.1  | 1865.7 |
| gdb 521 | 1860.7 <sup>a</sup> | 1858.2 | 1858.2  | 1862.6 | 1853.2 | 1853.2  | 1857.3 |
| gdb 522 | 1867.9 <sup>a</sup> | 1866.4 | 1866.4  | 1869.3 | 1858.1 | 1858.1  | 1862.6 |
| gdb 523 | 1859.6 <sup>a</sup> | 1853.2 | 1853.2  | 1857.0 | 1848.6 | 1848.6  | 1852.3 |
| gdb 524 | 1860.6 <sup>a</sup> | 1852.3 | 1852.3  | 1855.6 | 1847.2 | 1847.2  | 1851.0 |
| gdb 525 | 1863.5 <sup>a</sup> | 1856.5 | 1856.5  | 1858.9 | 1850.2 | 1850.2  | 1853.5 |
| gdb 526 | 1866.0 <sup>a</sup> | 1873.6 | 1873.6  | 1877.5 | 1865.4 | 1865.4  | 1870.0 |
| gdb 527 | 1865.0 <sup>a</sup> | 1862.9 | 1862.9  | 1867.0 | 1858.5 | 1858.5  | 1862.3 |
| gdb 528 | 1861.8 <sup>a</sup> | 1861.6 | 1861.6  | 1865.1 | 1856.8 | 1856.8  | 1860.9 |
| gdb 529 | 1865.0 <sup>a</sup> | 1855.6 | 1855.6  | 1858.9 | 1852.0 | 1852.0  | 1855.2 |
| gdb 530 | 1845.6 <sup>a</sup> | 1838.9 | 1838.9  | 1843.1 | 1834.6 | 1834.6  | 1838.8 |
| gdb 531 | 1873.4 <sup>a</sup> | 1873.5 | 1873.5  | 1877.6 | 1867.9 | 1867.9  | 1871.8 |
| gdb 532 | 1873.7 <sup>a</sup> | 1873.7 | 1873.7  | 1878.0 | 1868.1 | 1868.1  | 1872.0 |
| gdb 533 | 1870.4 <sup>a</sup> | 1867.0 | 1867.0  | 1870.2 | 1862.1 | 1862.1  | 1865.1 |
| gdb 534 | 1843.4 <sup>a</sup> | 1833.5 | 1833.5  | 1836.3 | 1829.3 | 1829.3  | 1832.5 |
| gdb 535 | 1868.9 <sup>a</sup> | 1868.6 | 1868.6  | 1872.6 | 1863.8 | 1863.7  | 1867.9 |
| gdb 536 | 1873.4 <sup>a</sup> | 1872.4 | 1872.4  | 1876.5 | 1867.3 | 1867.3  | 1870.8 |
| gdb 537 | 1872.7 <sup>a</sup> | 1881.0 | 1881.0  | 1885.0 | 1872.1 | 1872.1  | 1876.8 |
| gdb 538 | 1869.9 <sup>a</sup> | 1865.4 | 1865.4  | 1869.0 | 1861.0 | 1861.0  | 1863.9 |
| gdb 539 | 1869.1 <sup>a</sup> | 1870.4 | 1870.4  | 1874.3 | 1865.3 | 1865.3  | 1869.0 |
| gdb 540 | 1867.3 <sup>a</sup> | 1868.0 | 1868.0  | 1871.8 | 1862.9 | 1862.9  | 1866.9 |
| gdb 541 | 1869.9 <sup>a</sup> | 1870.4 | 1870.4  | 1874.3 | 1864.9 | 1864.8  | 1868.5 |
| gdb 542 | 1866.8 <sup>a</sup> | 1867.4 | 1867.4  | 1871.1 | 1862.4 | 1862.3  | 1866.7 |
| gdb 543 | 1868.6 <sup>a</sup> | 1869.9 | 1869.7  | 1873.7 | 1864.7 | 1864.6  | 1868.9 |
| gdb 544 | 1891.2 <sup>a</sup> | 1896.2 | 1896.2  | 1898.7 | 1891.7 | 1891.7  | 1895.6 |
| gdb 545 | 1874.4 <sup>a</sup> | 1877.8 | 1877.8  | 1880.6 | 1869.9 | 1869.9  | 1875.6 |
| gdb 546 | 1868.1 <sup>a</sup> | 1867.0 | 1867.0  | 1869.7 | 1862.3 | 1862.3  | 1866.4 |
| gdb 547 | 1866.5 <sup>a</sup> | 1864.7 | 1864.7  | 1867.3 | 1860.1 | 1860.1  | 1864.0 |
| gdb 548 | 1889.5 <sup>a</sup> | 1895.1 | 1895.1  | 1897.9 | 1885.2 | 1885.2  | 1888.9 |
| gdb 549 | 1885.5 <sup>a</sup> | 1880.1 | 1880.1  | 1883.8 | 1874.1 | 1874.1  | 1878.6 |
| gdb 550 | 1888.9 <sup>a</sup> | 1884.1 | 1884.1  | 1887.3 | 1877.8 | 1877.8  | 1880.9 |
| gdb 551 | 1885.2 <sup>a</sup> | 1879.4 | 1879.3  | 1883.0 | 1873.2 | 1873.2  | 1877.6 |
| gdb 552 | 1869.7 <sup>a</sup> | 1880.3 | 1880.3  | 1884.8 | 1871.2 | 1871.2  | 1876.3 |
| gdb 553 | 1868.4 <sup>a</sup> | 1869.0 | 1869.0  | 1873.4 | 1863.7 | 1863.7  | 1868.0 |
| gdb 554 | 1867.8 <sup>a</sup> | 1867.6 | 1867.6  | 1871.7 | 1862.8 | 1862.8  | 1867.3 |
| gdb 555 | 1868.7 <sup>a</sup> | 1869.9 | 1869.9  | 1874.3 | 1864.8 | 1864.8  | 1869.1 |
| gdb 556 | 1863.1 <sup>a</sup> | 1861.3 | 1861.3  | 1863.9 | 1855.1 | 1855.0  | 1859.1 |
| gdb 557 | 1856.9 <sup>a</sup> | 1846.0 | 1846.0  | 1849.0 | 1844.2 | 1844.2  | 1847.2 |
| gdb 558 | 1856.2 <sup>a</sup> | 1848.6 | 1848.6  | 1851.5 | 1845.8 | 1845.8  | 1849.1 |
| gdb 559 | 1870.3 <sup>a</sup> | 1874.9 | 1874.9  | 1879.7 | 1868.9 | 1868.8  | 1873.1 |
| gdb 560 | 1865.0 <sup>a</sup> | 1862.8 | 1862.8  | 1865.9 | 1857.8 | 1857.8  | 1861.5 |
| gdb 561 | 1871.5 <sup>a</sup> | 1868.3 | 1868.3  | 1871.5 | 1863.8 | 1863.8  | 1867.5 |
| gdb 562 | 1870.1 <sup>a</sup> | 1868.7 | 1868.7  | 1871.9 | 1864.3 | 1864.3  | 1868.1 |
| gdb 563 | 1872.7 <sup>a</sup> | 1864.1 | 1864.1  | 1867.3 | 1858.5 | 1858.5  | 1861.8 |
| gdb 564 | 1868.4 <sup>a</sup> | 1866.9 | 1866.9  | 1872.1 | 1860.9 | 1860.9  | 1866.1 |
| gdb 565 | 1872.8 <sup>a</sup> | 1865.7 | 1865.6  | 1868.7 | 1860.1 | 1860.1  | 1863.5 |
| gdb 566 | 1899.5 <sup>a</sup> | 1900.2 | 1900.2  | 1903.8 | 1893.5 | 1893.5  | 1897.2 |
| gdb 567 | 1906.6 <sup>a</sup> | 1907.9 | 1907.9  | 1910.4 | 1898.6 | 1898.5  | 1903.0 |
| gdb 568 | 1898.2 <sup>a</sup> | 1898.9 | 1898.9  | 1902.9 | 1892.6 | 1892.6  | 1897.0 |
| gdb 569 | 1897.1 <sup>a</sup> | 1897.4 | 1897.3  | 1901.6 | 1891.0 | 1891.0  | 1895.7 |
| gdb 570 | 1899.2 <sup>a</sup> | 1901.2 | 1901.2  | 1905.0 | 1895.0 | 1895.0  | 1899.4 |
| gdb 571 | 1877.5 <sup>a</sup> | 1880.2 | 1880.2  | 1882.9 | 1876.8 | 1876.7  | 1879.8 |
| gdb 572 | 1881.0 <sup>a</sup> | 1883.0 | 1883.0  | 1885.6 | 1879.4 | 1879.4  | 1882.7 |
| gdb 573 | 1881.4 <sup>a</sup> | 1882.3 | 1882.3  | 1885.1 | 1879.0 | 1879.0  | 1882.4 |
| gdb 574 | 1878.6 <sup>a</sup> | 1880.3 | 1880.3  | 1883.2 | 1877.7 | 1877.6  | 1880.7 |
| gdb 575 | 1881.8 <sup>a</sup> | 1883.0 | 1883.0  | 1884.9 | 1877.3 | 1877.3  | 1880.6 |
| gdb 576 | 1883.7 <sup>a</sup> | 1885.3 | 1885.3  | 1887.9 | 1881.3 | 1881.3  | 1884.9 |
| gdb 577 | 1881.0 <sup>a</sup> | 1879.6 | 1879.6  | 1884.4 | 1871.4 | 1871.4  | 1877.8 |
| gdb 578 | 1875.7 <sup>a</sup> | 1873.4 | 1873.4  | 1878.2 | 1868.6 | 1868.5  | 1873.2 |
| gdb 579 | 1876.6 <sup>a</sup> | 1873.6 | 1873.6  | 1878.2 | 1869.1 | 1869.1  | 1874.2 |
| gdb 580 | 1867.5 <sup>a</sup> | 1862.2 | 1862.2  | 1865.6 | 1858.0 | 1858.0  | 1862.6 |
| gdb 581 | 1864.9 <sup>a</sup> | 1861.6 | 1861.6  | 1865.0 | 1857.1 | 1857.1  | 1861.9 |
| gdb 582 | 1864.2 <sup>a</sup> | 1860.7 | 1860.7  | 1864.1 | 1855.9 | 1855.9  | 1860.8 |

... continued on next page ...

Table S73: ... continued from previous page ...

| Species | Ref.                | OM2    | OM2-D3T | ODM2   | OM3    | OM3-D3T | ODM3   |
|---------|---------------------|--------|---------|--------|--------|---------|--------|
| gdb 583 | 1897.5 <sup>a</sup> | 1902.2 | 1902.2  | 1905.3 | 1895.0 | 1895.0  | 1899.4 |
| gdb 584 | 1896.8 <sup>a</sup> | 1902.8 | 1902.8  | 1905.4 | 1895.3 | 1895.3  | 1899.8 |
| gdb 585 | 1891.8 <sup>a</sup> | 1896.2 | 1896.2  | 1898.6 | 1888.6 | 1888.6  | 1893.6 |
| gdb 586 | 1886.0 <sup>a</sup> | 1892.1 | 1892.1  | 1895.7 | 1887.3 | 1887.3  | 1891.9 |
| gdb 587 | 1894.9 <sup>a</sup> | 1902.6 | 1902.6  | 1905.6 | 1894.5 | 1894.5  | 1898.7 |
| gdb 588 | 1894.0 <sup>a</sup> | 1901.7 | 1901.7  | 1904.4 | 1893.3 | 1893.2  | 1897.2 |
| gdb 589 | 1910.5 <sup>a</sup> | 1918.0 | 1918.0  | 1920.0 | 1908.8 | 1908.8  | 1911.8 |
| gdb 590 | 1912.2 <sup>a</sup> | 1916.4 | 1916.4  | 1918.9 | 1907.8 | 1907.8  | 1911.8 |
| gdb 591 | 1906.1 <sup>a</sup> | 1912.2 | 1912.2  | 1915.5 | 1905.7 | 1905.7  | 1908.9 |
| gdb 592 | 1905.7 <sup>a</sup> | 1909.9 | 1909.9  | 1914.0 | 1903.9 | 1903.9  | 1908.2 |
| gdb 593 | 1911.3 <sup>a</sup> | 1913.6 | 1913.6  | 1916.7 | 1905.2 | 1905.2  | 1910.0 |
| gdb 594 | 1899.2 <sup>a</sup> | 1902.3 | 1902.3  | 1905.4 | 1894.4 | 1894.4  | 1899.5 |
| gdb 595 | 1899.8 <sup>a</sup> | 1903.3 | 1903.3  | 1906.6 | 1895.6 | 1895.6  | 1900.9 |
| gdb 596 | 1898.7 <sup>a</sup> | 1900.7 | 1900.7  | 1903.5 | 1892.7 | 1892.7  | 1898.1 |
| gdb 597 | 1893.9 <sup>a</sup> | 1894.3 | 1894.3  | 1898.1 | 1889.5 | 1889.5  | 1894.0 |
| gdb 598 | 1896.9 <sup>a</sup> | 1897.9 | 1897.9  | 1900.1 | 1890.9 | 1890.9  | 1895.4 |
| gdb 599 | 1868.1 <sup>a</sup> | 1860.3 | 1860.3  | 1863.3 | 1856.7 | 1856.7  | 1860.6 |
| gdb 600 | 1893.7 <sup>a</sup> | 1897.5 | 1897.5  | 1900.7 | 1890.5 | 1890.4  | 1895.9 |
| gdb 601 | 1888.5 <sup>a</sup> | 1891.1 | 1891.1  | 1894.5 | 1886.2 | 1886.2  | 1890.6 |
| gdb 602 | 1892.5 <sup>a</sup> | 1896.6 | 1896.6  | 1899.6 | 1889.2 | 1889.2  | 1894.4 |
| gdb 603 | 1879.1 <sup>a</sup> | 1877.1 | 1877.1  | 1880.4 | 1874.4 | 1874.4  | 1878.0 |
| gdb 604 | 1885.6 <sup>a</sup> | 1886.6 | 1886.6  | 1889.5 | 1881.1 | 1881.1  | 1885.5 |
| gdb 605 | 1876.1 <sup>a</sup> | 1874.8 | 1874.8  | 1878.1 | 1871.8 | 1871.8  | 1876.2 |
| gdb 606 | 1888.5 <sup>a</sup> | 1891.6 | 1891.6  | 1893.8 | 1885.0 | 1885.0  | 1889.3 |
| gdb 607 | 1880.4 <sup>a</sup> | 1880.7 | 1880.7  | 1884.0 | 1877.5 | 1877.5  | 1881.5 |
| gdb 608 | 1897.7 <sup>a</sup> | 1901.0 | 1901.0  | 1902.6 | 1893.2 | 1893.2  | 1897.4 |
| gdb 609 | 1886.4 <sup>a</sup> | 1888.7 | 1888.7  | 1891.8 | 1884.3 | 1884.3  | 1888.7 |
| gdb 610 | 1892.1 <sup>a</sup> | 1893.7 | 1893.7  | 1896.0 | 1887.2 | 1887.1  | 1891.6 |
| gdb 611 | 1891.8 <sup>a</sup> | 1896.1 | 1896.1  | 1898.6 | 1890.9 | 1890.9  | 1895.0 |
| gdb 612 | 1891.7 <sup>a</sup> | 1896.0 | 1896.0  | 1898.8 | 1887.6 | 1887.6  | 1892.9 |
| gdb 613 | 1885.1 <sup>a</sup> | 1890.1 | 1890.1  | 1893.8 | 1884.7 | 1884.6  | 1889.5 |
| gdb 614 | 1884.3 <sup>a</sup> | 1889.4 | 1889.4  | 1892.9 | 1883.7 | 1883.7  | 1888.7 |
| gdb 615 | 1890.6 <sup>a</sup> | 1895.9 | 1895.9  | 1898.9 | 1888.1 | 1888.1  | 1893.6 |
| gdb 616 | 1885.4 <sup>a</sup> | 1888.5 | 1888.5  | 1890.1 | 1882.3 | 1882.3  | 1886.6 |
| gdb 617 | 1879.6 <sup>a</sup> | 1883.5 | 1883.5  | 1886.6 | 1880.0 | 1880.0  | 1883.7 |
| gdb 618 | 1878.9 <sup>a</sup> | 1880.2 | 1880.2  | 1883.0 | 1876.6 | 1876.6  | 1880.5 |
| gdb 619 | 1875.6 <sup>a</sup> | 1876.9 | 1876.8  | 1879.4 | 1874.0 | 1874.0  | 1877.6 |
| gdb 620 | 1881.4 <sup>a</sup> | 1884.6 | 1884.6  | 1886.8 | 1881.1 | 1881.1  | 1884.4 |
| gdb 621 | 1882.4 <sup>a</sup> | 1885.2 | 1885.2  | 1887.7 | 1880.9 | 1880.8  | 1884.3 |
| gdb 622 | 1887.8 <sup>a</sup> | 1891.9 | 1891.9  | 1893.6 | 1885.3 | 1885.2  | 1889.1 |
| gdb 623 | 1893.1 <sup>a</sup> | 1899.3 | 1899.3  | 1901.4 | 1892.3 | 1892.3  | 1896.8 |
| gdb 624 | 1886.9 <sup>a</sup> | 1896.2 | 1896.2  | 1898.9 | 1891.1 | 1891.1  | 1895.1 |
| gdb 625 | 1889.7 <sup>a</sup> | 1895.0 | 1895.0  | 1897.4 | 1890.3 | 1890.3  | 1894.2 |
| gdb 626 | 1889.1 <sup>a</sup> | 1895.6 | 1895.6  | 1898.6 | 1890.7 | 1890.7  | 1895.2 |
| gdb 627 | 1895.6 <sup>a</sup> | 1899.0 | 1899.0  | 1900.6 | 1891.3 | 1891.3  | 1896.5 |
| gdb 628 | 1891.9 <sup>a</sup> | 1896.3 | 1896.3  | 1899.3 | 1891.3 | 1891.3  | 1895.8 |
| gdb 629 | 1893.0 <sup>a</sup> | 1897.0 | 1897.0  | 1900.2 | 1891.8 | 1891.7  | 1896.1 |
| gdb 630 | 1897.1 <sup>a</sup> | 1898.7 | 1898.7  | 1900.7 | 1891.7 | 1891.7  | 1896.3 |
| gdb 631 | 1896.9 <sup>a</sup> | 1909.0 | 1909.0  | 1911.0 | 1900.9 | 1900.9  | 1904.7 |
| gdb 632 | 1894.9 <sup>a</sup> | 1905.4 | 1905.4  | 1907.2 | 1896.8 | 1896.8  | 1900.9 |
| gdb 633 | 1891.1 <sup>a</sup> | 1900.2 | 1900.2  | 1902.9 | 1894.6 | 1894.6  | 1898.0 |
| gdb 634 | 1895.2 <sup>a</sup> | 1904.1 | 1904.1  | 1905.7 | 1895.3 | 1895.3  | 1899.1 |
| gdb 635 | 1899.4 <sup>a</sup> | 1907.4 | 1907.4  | 1908.8 | 1899.6 | 1899.5  | 1902.7 |
| gdb 636 | 1897.0 <sup>a</sup> | 1906.8 | 1906.8  | 1908.4 | 1898.5 | 1898.5  | 1901.8 |
| gdb 637 | 1873.3 <sup>a</sup> | 1873.2 | 1873.2  | 1875.5 | 1865.6 | 1865.6  | 1872.1 |
| gdb 638 | 1860.4 <sup>a</sup> | 1857.7 | 1857.7  | 1860.0 | 1852.0 | 1852.0  | 1857.9 |
| gdb 639 | 1848.7 <sup>a</sup> | 1848.1 | 1848.1  | 1851.0 | 1843.9 | 1843.9  | 1849.1 |
| gdb 640 | 1846.7 <sup>a</sup> | 1851.8 | 1851.7  | 1855.4 | 1847.1 | 1847.1  | 1852.3 |
| gdb 641 | 1856.2 <sup>a</sup> | 1858.3 | 1858.3  | 1860.0 | 1851.2 | 1851.2  | 1856.9 |
| gdb 642 | 1871.5 <sup>a</sup> | 1876.8 | 1876.8  | 1878.2 | 1874.5 | 1874.5  | 1871.2 |
| gdb 643 | 1871.8 <sup>a</sup> | 1874.2 | 1874.2  | 1875.4 | 1872.3 | 1872.3  | 1872.7 |
| gdb 644 | 1871.4 <sup>a</sup> | 1877.0 | 1876.5  | 1875.4 | 1871.8 | 1871.7  | 1868.5 |
| gdb 645 | 1867.8 <sup>a</sup> | 1872.5 | 1872.5  | 1869.8 | 1868.3 | 1868.1  | 1864.1 |
| gdb 646 | 1873.1 <sup>a</sup> | 1876.5 | 1876.5  | 1874.1 | 1872.6 | 1872.6  | 1868.4 |
| gdb 647 | 1885.2 <sup>a</sup> | 1883.4 | 1883.4  | 1883.6 | 1881.9 | 1881.9  | 1882.3 |

... continued on next page ...

Table S73: ... continued from previous page ...

| Species | Ref.                | OM2    | OM2-D3T | ODM2   | OM3    | OM3-D3T | ODM3   |
|---------|---------------------|--------|---------|--------|--------|---------|--------|
| gdb 648 | 1892.2 <sup>a</sup> | 1894.8 | 1894.8  | 1897.7 | 1894.3 | 1894.2  | 1897.9 |
| gdb 649 | 1888.9 <sup>a</sup> | 1894.6 | 1894.6  | 1898.0 | 1893.6 | 1893.6  | 1896.7 |
| gdb 650 | 1897.5 <sup>a</sup> | 1895.3 | 1895.3  | 1897.5 | 1894.8 | 1894.8  | 1896.6 |
| gdb 651 | 1910.0 <sup>a</sup> | 1916.8 | 1916.8  | 1919.2 | 1914.7 | 1914.7  | 1917.8 |
| gdb 652 | 1907.1 <sup>a</sup> | 1914.5 | 1914.5  | 1916.6 | 1912.8 | 1912.8  | 1915.0 |
| gdb 653 | 1910.5 <sup>a</sup> | 1917.7 | 1917.7  | 1919.8 | 1916.1 | 1916.1  | 1918.4 |
| gdb 654 | 1876.8 <sup>a</sup> | 1876.7 | 1876.7  | 1879.7 | 1876.6 | 1876.6  | 1879.5 |
| gdb 655 | 1873.4 <sup>a</sup> | 1874.1 | 1874.1  | 1877.0 | 1874.2 | 1874.2  | 1877.4 |
| gdb 656 | 1897.6 <sup>a</sup> | 1884.5 | 1884.5  | 1887.0 | 1883.6 | 1883.6  | 1886.8 |
| gdb 657 | 1870.8 <sup>a</sup> | 1875.7 | 1875.7  | 1877.2 | 1876.2 | 1876.2  | 1878.2 |
| gdb 658 | 1895.8 <sup>a</sup> | 1880.5 | 1880.4  | 1881.9 | 1880.4 | 1880.4  | 1882.4 |
| gdb 659 | 1874.9 <sup>a</sup> | 1875.5 | 1875.5  | 1874.7 | 1873.6 | 1873.6  | 1872.0 |
| gdb 660 | 1897.1 <sup>a</sup> | 1907.3 | 1907.3  | 1909.7 | 1906.8 | 1906.8  | 1909.1 |
| gdb 661 | 1893.1 <sup>a</sup> | 1902.0 | 1902.0  | 1904.6 | 1901.5 | 1901.5  | 1904.4 |
| gdb 662 | 1919.7 <sup>a</sup> | 1909.2 | 1909.2  | 1910.6 | 1908.7 | 1908.7  | 1910.9 |
| gdb 663 | 1913.5 <sup>a</sup> | 1921.1 | 1921.1  | 1923.5 | 1919.7 | 1919.7  | 1922.6 |
| gdb 664 | 1913.2 <sup>a</sup> | 1919.8 | 1919.8  | 1922.2 | 1918.2 | 1918.2  | 1921.6 |
| gdb 665 | 1910.0 <sup>a</sup> | 1917.5 | 1917.5  | 1919.6 | 1915.8 | 1915.8  | 1918.3 |
| gdb 666 | 1916.7 <sup>a</sup> | 1924.7 | 1924.7  | 1926.6 | 1922.9 | 1922.9  | 1924.7 |
| gdb 667 | 1933.5 <sup>a</sup> | 1930.7 | 1930.7  | 1931.9 | 1928.2 | 1928.1  | 1930.8 |
| gdb 668 | 1918.0 <sup>a</sup> | 1927.4 | 1927.4  | 1929.2 | 1925.4 | 1925.3  | 1926.9 |
| gdb 669 | 1929.0 <sup>a</sup> | 1929.9 | 1929.9  | 1931.0 | 1927.3 | 1927.3  | 1930.1 |
| gdb 670 | 1915.7 <sup>a</sup> | 1923.4 | 1923.4  | 1925.1 | 1922.1 | 1922.1  | 1924.3 |
| gdb 671 | 1913.4 <sup>a</sup> | 1922.0 | 1922.0  | 1923.8 | 1920.5 | 1920.5  | 1922.8 |
| gdb 672 | 1912.1 <sup>a</sup> | 1920.1 | 1920.1  | 1921.9 | 1918.3 | 1918.3  | 1920.4 |
| gdb 673 | 1931.9 <sup>a</sup> | 1930.6 | 1930.6  | 1931.1 | 1928.0 | 1928.0  | 1930.1 |
| gdb 674 | 1932.8 <sup>a</sup> | 1935.3 | 1935.3  | 1936.1 | 1933.9 | 1933.9  | 1936.0 |
| gdb 675 | 1914.3 <sup>a</sup> | 1927.0 | 1927.0  | 1928.4 | 1926.9 | 1926.9  | 1928.5 |
| gdb 676 | 1911.3 <sup>a</sup> | 1924.1 | 1924.1  | 1925.9 | 1923.9 | 1923.9  | 1926.1 |
| gdb 677 | 1892.2 <sup>a</sup> | 1897.5 | 1897.5  | 1899.8 | 1897.0 | 1896.9  | 1899.7 |
| gdb 678 | 1893.5 <sup>a</sup> | 1896.6 | 1896.6  | 1899.1 | 1896.4 | 1896.4  | 1899.4 |
| gdb 679 | 1894.2 <sup>a</sup> | 1897.0 | 1897.0  | 1899.5 | 1897.1 | 1897.1  | 1900.1 |
| gdb 680 | 1897.4 <sup>a</sup> | 1900.6 | 1900.6  | 1903.2 | 1900.4 | 1900.4  | 1903.4 |
| gdb 681 | 1918.3 <sup>a</sup> | 1904.2 | 1904.2  | 1905.3 | 1904.2 | 1904.2  | 1906.4 |
| gdb 682 | 1908.0 <sup>a</sup> | 1907.6 | 1907.6  | 1908.2 | 1906.2 | 1906.2  | 1907.6 |
| gdb 683 | 1894.0 <sup>a</sup> | 1898.8 | 1898.8  | 1896.6 | 1896.4 | 1896.4  | 1893.6 |
| gdb 684 | 1909.9 <sup>a</sup> | 1910.2 | 1910.2  | 1910.6 | 1908.4 | 1908.4  | 1909.4 |
| gdb 685 | 1889.8 <sup>a</sup> | 1900.4 | 1900.3  | 1901.7 | 1899.8 | 1899.7  | 1900.7 |
| gdb 686 | 1895.5 <sup>a</sup> | 1906.3 | 1906.3  | 1908.2 | 1904.6 | 1904.6  | 1905.9 |
| gdb 687 | 1893.3 <sup>a</sup> | 1902.4 | 1902.4  | 1904.7 | 1901.1 | 1901.1  | 1903.5 |
| gdb 688 | 1896.3 <sup>a</sup> | 1899.5 | 1899.5  | 1901.2 | 1898.8 | 1898.8  | 1899.9 |
| gdb 689 | 1915.1 <sup>a</sup> | 1905.3 | 1905.3  | 1906.2 | 1904.0 | 1904.0  | 1905.9 |
| gdb 690 | 1874.2 <sup>a</sup> | 1875.1 | 1875.1  | 1877.8 | 1874.6 | 1874.6  | 1877.3 |
| gdb 691 | 1873.4 <sup>a</sup> | 1874.2 | 1874.2  | 1877.0 | 1873.8 | 1873.8  | 1876.8 |
| gdb 692 | 1873.0 <sup>a</sup> | 1874.4 | 1874.4  | 1877.2 | 1873.5 | 1873.5  | 1875.9 |
| gdb 693 | 1894.5 <sup>a</sup> | 1882.5 | 1882.5  | 1884.7 | 1881.3 | 1881.3  | 1884.3 |
| gdb 694 | 1874.9 <sup>a</sup> | 1875.8 | 1875.7  | 1874.7 | 1873.5 | 1873.4  | 1871.5 |
| gdb 695 | 1868.6 <sup>a</sup> | 1874.6 | 1874.6  | 1876.0 | 1874.1 | 1874.1  | 1875.5 |
| gdb 696 | 1871.0 <sup>a</sup> | 1869.7 | 1869.7  | 1871.4 | 1869.9 | 1869.8  | 1871.1 |
| gdb 697 | 1892.7 <sup>a</sup> | 1878.3 | 1878.2  | 1879.2 | 1877.8 | 1877.8  | 1879.5 |
| gdb 698 | 1906.9 <sup>a</sup> | 1904.3 | 1904.3  | 1904.7 | 1901.8 | 1901.7  | 1903.9 |
| gdb 699 | 1892.0 <sup>a</sup> | 1896.2 | 1896.2  | 1897.3 | 1896.1 | 1896.1  | 1897.6 |
| gdb 700 | 1900.3 <sup>a</sup> | 1901.1 | 1901.1  | 1898.9 | 1898.1 | 1898.1  | 1895.2 |
| gdb 701 | 1910.9 <sup>a</sup> | 1914.5 | 1914.5  | 1916.1 | 1912.1 | 1912.1  | 1915.0 |
| gdb 702 | 1915.7 <sup>a</sup> | 1919.5 | 1919.5  | 1920.7 | 1917.0 | 1917.0  | 1919.1 |
| gdb 703 | 1899.4 <sup>a</sup> | 1905.4 | 1905.4  | 1906.9 | 1904.9 | 1904.9  | 1906.5 |
| gdb 704 | 1893.9 <sup>a</sup> | 1900.4 | 1900.4  | 1901.8 | 1899.9 | 1899.9  | 1902.0 |
| gdb 705 | 1896.0 <sup>a</sup> | 1909.6 | 1909.6  | 1911.7 | 1908.3 | 1908.3  | 1910.3 |
| gdb 706 | 1901.1 <sup>a</sup> | 1904.1 | 1904.1  | 1906.6 | 1900.4 | 1900.4  | 1904.8 |
| gdb 707 | 1899.6 <sup>a</sup> | 1901.4 | 1901.4  | 1903.5 | 1899.8 | 1899.8  | 1901.8 |
| gdb 708 | 1904.1 <sup>a</sup> | 1906.0 | 1906.0  | 1908.2 | 1903.1 | 1903.1  | 1906.6 |
| gdb 709 | 1887.8 <sup>a</sup> | 1897.4 | 1897.4  | 1900.5 | 1895.5 | 1895.5  | 1898.5 |
| gdb 710 | 1901.4 <sup>a</sup> | 1899.4 | 1899.4  | 1899.5 | 1897.1 | 1897.1  | 1899.2 |
| gdb 711 | 1887.5 <sup>a</sup> | 1891.4 | 1891.4  | 1892.4 | 1891.7 | 1891.7  | 1893.3 |
| gdb 712 | 1895.2 <sup>a</sup> | 1897.2 | 1897.2  | 1895.5 | 1894.8 | 1894.7  | 1892.3 |

... continued on next page ...

Table S73: ... continued from previous page ...

| Species | Ref.                | OM2    | OM2-D3T | ODM2   | OM3    | OM3-D3T | ODM3   |
|---------|---------------------|--------|---------|--------|--------|---------|--------|
| gdb 713 | 1915.4 <sup>a</sup> | 1922.3 | 1922.3  | 1924.2 | 1920.4 | 1920.4  | 1922.5 |
| gdb 714 | 1915.0 <sup>a</sup> | 1923.6 | 1923.6  | 1925.1 | 1921.2 | 1921.2  | 1922.2 |
| gdb 715 | 1913.8 <sup>a</sup> | 1920.9 | 1920.9  | 1922.8 | 1918.7 | 1918.7  | 1920.6 |
| gdb 716 | 1910.6 <sup>a</sup> | 1919.5 | 1919.5  | 1921.8 | 1917.7 | 1917.7  | 1920.2 |
| gdb 717 | 1926.3 <sup>a</sup> | 1926.2 | 1926.2  | 1927.2 | 1923.0 | 1922.9  | 1925.8 |
| gdb 718 | 1899.5 <sup>a</sup> | 1897.0 | 1897.0  | 1898.6 | 1894.2 | 1894.2  | 1897.7 |
| gdb 719 | 1910.1 <sup>a</sup> | 1912.0 | 1912.0  | 1914.0 | 1909.1 | 1909.1  | 1912.3 |
| gdb 720 | 1899.2 <sup>a</sup> | 1899.6 | 1899.6  | 1900.8 | 1899.3 | 1899.3  | 1901.1 |
| gdb 721 | 1897.0 <sup>a</sup> | 1899.9 | 1899.9  | 1901.4 | 1899.2 | 1899.2  | 1901.2 |
| gdb 722 | 1894.2 <sup>a</sup> | 1903.8 | 1903.8  | 1905.9 | 1902.1 | 1902.1  | 1904.7 |
| gdb 723 | 1909.4 <sup>a</sup> | 1922.2 | 1922.2  | 1923.6 | 1921.4 | 1921.4  | 1922.5 |
| gdb 724 | 1912.6 <sup>a</sup> | 1924.0 | 1924.0  | 1925.6 | 1923.2 | 1923.2  | 1924.9 |
| gdb 725 | 1915.2 <sup>a</sup> | 1927.2 | 1927.1  | 1928.7 | 1926.4 | 1926.4  | 1927.9 |
| gdb 726 | 1913.3 <sup>a</sup> | 1925.4 | 1925.4  | 1927.3 | 1924.7 | 1924.7  | 1926.5 |
| gdb 727 | 1930.2 <sup>a</sup> | 1932.4 | 1932.4  | 1933.3 | 1930.5 | 1930.4  | 1932.5 |
| gdb 728 | 1919.2 <sup>a</sup> | 1929.8 | 1929.8  | 1930.2 | 1932.6 | 1932.6  | 1932.6 |
| gdb 729 | 1896.4 <sup>a</sup> | 1901.0 | 1901.0  | 1902.3 | 1899.6 | 1899.6  | 1900.5 |
| gdb 730 | 1893.7 <sup>a</sup> | 1898.6 | 1898.6  | 1900.0 | 1897.2 | 1897.1  | 1899.0 |
| gdb 731 | 1896.4 <sup>a</sup> | 1908.6 | 1908.6  | 1910.6 | 1906.5 | 1906.5  | 1908.1 |
| gdb 732 | 1891.7 <sup>a</sup> | 1903.9 | 1903.9  | 1906.4 | 1902.0 | 1902.0  | 1904.3 |
| gdb 733 | 1911.3 <sup>a</sup> | 1914.1 | 1914.1  | 1915.6 | 1910.9 | 1910.9  | 1913.1 |
| gdb 734 | 1892.4 <sup>a</sup> | 1898.6 | 1898.5  | 1896.2 | 1895.5 | 1895.5  | 1892.5 |
| gdb 735 | 1889.0 <sup>a</sup> | 1900.3 | 1900.3  | 1901.7 | 1899.0 | 1899.0  | 1899.7 |
| gdb 736 | 1887.4 <sup>a</sup> | 1897.1 | 1897.3  | 1898.5 | 1896.7 | 1896.6  | 1897.6 |
| gdb 737 | 1906.9 <sup>a</sup> | 1907.2 | 1907.2  | 1907.8 | 1905.3 | 1905.3  | 1906.5 |
| gdb 738 | 1907.0 <sup>a</sup> | 1904.5 | 1904.5  | 1904.9 | 1902.3 | 1902.3  | 1904.6 |
| gdb 739 | 1907.4 <sup>a</sup> | 1904.5 | 1904.5  | 1904.7 | 1903.5 | 1903.4  | 1905.4 |
| gdb 740 | 1899.8 <sup>a</sup> | 1900.4 | 1900.3  | 1898.1 | 1897.7 | 1897.6  | 1894.9 |
| gdb 741 | 1894.5 <sup>a</sup> | 1898.4 | 1898.4  | 1899.6 | 1898.3 | 1898.3  | 1899.9 |
| gdb 742 | 1890.7 <sup>a</sup> | 1896.1 | 1896.1  | 1897.2 | 1894.7 | 1894.7  | 1896.3 |
| gdb 743 | 1895.3 <sup>a</sup> | 1897.0 | 1897.0  | 1898.8 | 1895.3 | 1895.3  | 1896.7 |
| gdb 744 | 1891.0 <sup>a</sup> | 1899.2 | 1899.2  | 1902.5 | 1897.4 | 1897.3  | 1900.7 |
| gdb 745 | 1889.8 <sup>a</sup> | 1897.6 | 1897.6  | 1900.3 | 1895.3 | 1895.3  | 1898.4 |
| gdb 746 | 1903.0 <sup>a</sup> | 1903.0 | 1903.0  | 1904.7 | 1899.8 | 1899.8  | 1903.3 |
| gdb 747 | 1899.6 <sup>a</sup> | 1898.8 | 1898.7  | 1900.0 | 1896.7 | 1896.7  | 1899.7 |
| gdb 748 | 1899.3 <sup>a</sup> | 1897.6 | 1897.6  | 1898.7 | 1896.4 | 1896.4  | 1899.4 |
| gdb 749 | 1895.1 <sup>a</sup> | 1894.4 | 1894.4  | 1892.8 | 1892.7 | 1892.6  | 1890.3 |
| gdb 750 | 1890.4 <sup>a</sup> | 1894.1 | 1894.1  | 1895.5 | 1894.3 | 1894.3  | 1896.3 |
| gdb 751 | 1888.0 <sup>a</sup> | 1893.5 | 1893.4  | 1894.9 | 1892.8 | 1892.8  | 1894.4 |
| gdb 752 | 1894.5 <sup>a</sup> | 1895.8 | 1895.8  | 1896.7 | 1894.5 | 1894.5  | 1895.8 |
| gdb 753 | 1896.1 <sup>a</sup> | 1899.2 | 1899.2  | 1900.6 | 1898.2 | 1898.2  | 1900.0 |
| gdb 754 | 1895.4 <sup>a</sup> | 1904.3 | 1904.3  | 1906.1 | 1902.3 | 1902.3  | 1904.7 |
| gdb 755 | 1892.2 <sup>a</sup> | 1900.8 | 1900.8  | 1903.1 | 1898.9 | 1898.9  | 1901.4 |
| gdb 756 | 1908.2 <sup>a</sup> | 1909.6 | 1909.6  | 1910.9 | 1906.4 | 1906.4  | 1909.3 |
| gdb 757 | 1910.6 <sup>a</sup> | 1909.1 | 1909.1  | 1911.0 | 1906.4 | 1906.4  | 1910.6 |
| gdb 758 | 1889.2 <sup>a</sup> | 1896.4 | 1896.4  | 1897.9 | 1895.3 | 1895.3  | 1898.3 |
| gdb 759 | 1906.2 <sup>a</sup> | 1904.6 | 1904.6  | 1906.1 | 1902.2 | 1902.2  | 1905.8 |
| gdb 760 | 1920.3 <sup>a</sup> | 1930.8 | 1930.8  | 1931.4 | 1933.8 | 1933.8  | 1934.3 |
| gdb 761 | 1896.7 <sup>a</sup> | 1899.1 | 1899.1  | 1896.5 | 1895.3 | 1895.3  | 1891.8 |
| gdb 762 | 1893.7 <sup>a</sup> | 1898.1 | 1898.1  | 1899.4 | 1897.7 | 1897.7  | 1898.6 |
| gdb 763 | 1894.4 <sup>a</sup> | 1900.1 | 1900.1  | 1901.2 | 1897.9 | 1897.9  | 1899.0 |
| gdb 764 | 1893.2 <sup>a</sup> | 1898.7 | 1898.7  | 1900.1 | 1896.7 | 1896.7  | 1898.0 |
| gdb 765 | 1909.0 <sup>a</sup> | 1907.0 | 1907.0  | 1907.5 | 1903.6 | 1903.6  | 1905.2 |
| gdb 766 | 1896.4 <sup>a</sup> | 1896.4 | 1896.4  | 1894.8 | 1893.7 | 1893.6  | 1890.8 |
| gdb 767 | 1890.0 <sup>a</sup> | 1892.9 | 1892.9  | 1894.3 | 1893.3 | 1893.3  | 1895.2 |
| gdb 768 | 1887.7 <sup>a</sup> | 1893.8 | 1893.8  | 1895.2 | 1893.0 | 1892.9  | 1894.6 |
| gdb 769 | 1887.8 <sup>a</sup> | 1892.4 | 1892.4  | 1894.1 | 1891.6 | 1891.5  | 1893.5 |
| gdb 770 | 1899.4 <sup>a</sup> | 1897.8 | 1897.8  | 1899.2 | 1895.6 | 1895.6  | 1898.5 |
| gdb 771 | 1907.5 <sup>a</sup> | 1905.9 | 1905.9  | 1907.0 | 1904.1 | 1904.1  | 1907.8 |
| gdb 772 | 1888.3 <sup>a</sup> | 1896.6 | 1896.6  | 1898.0 | 1895.4 | 1895.4  | 1898.5 |
| gdb 773 | 1894.4 <sup>a</sup> | 1900.4 | 1900.4  | 1902.1 | 1899.2 | 1899.2  | 1902.3 |
| gdb 774 | 1909.4 <sup>a</sup> | 1920.5 | 1920.5  | 1920.6 | 1923.6 | 1923.6  | 1923.1 |
| gdb 775 | 1892.7 <sup>a</sup> | 1898.6 | 1898.6  | 1900.2 | 1897.5 | 1897.4  | 1900.5 |
| gdb 776 | 1891.6 <sup>a</sup> | 1898.7 | 1898.7  | 1900.7 | 1897.5 | 1897.5  | 1900.8 |
| gdb 777 | 1892.7 <sup>a</sup> | 1896.1 | 1896.1  | 1898.2 | 1895.7 | 1895.6  | 1898.5 |

... continued on next page ...



Table S73: ... continued from previous page ...

| Species | Ref.                | OM2    | OM2-D3T | ODM2   | OM3    | OM3-D3T | ODM3   |
|---------|---------------------|--------|---------|--------|--------|---------|--------|
| gdb 778 | 1905.8 <sup>a</sup> | 1903.2 | 1903.2  | 1904.9 | 1900.2 | 1900.2  | 1904.0 |
| gdb 779 | 1908.7 <sup>a</sup> | 1917.4 | 1917.4  | 1917.1 | 1919.9 | 1919.9  | 1919.5 |
| gdb 780 | 1889.9 <sup>a</sup> | 1899.0 | 1899.0  | 1899.8 | 1901.3 | 1901.2  | 1901.9 |
| gdb 781 | 1887.7 <sup>a</sup> | 1894.4 | 1894.4  | 1894.2 | 1897.4 | 1897.4  | 1896.7 |
| gdb 782 | 1865.1 <sup>a</sup> | 1866.7 | 1866.6  | 1864.4 | 1863.9 | 1863.8  | 1860.9 |
| gdb 783 | 1887.2 <sup>a</sup> | 1898.0 | 1898.0  | 1899.8 | 1900.5 | 1900.5  | 1902.9 |
| gdb 784 | 1885.9 <sup>a</sup> | 1893.7 | 1893.7  | 1893.7 | 1896.6 | 1896.6  | 1897.1 |
| gdb 785 | 1873.3 <sup>a</sup> | 1871.5 | 1871.4  | 1873.2 | 1869.7 | 1869.7  | 1871.4 |
| gdb 786 | 1868.1 <sup>a</sup> | 1868.1 | 1868.1  | 1869.3 | 1866.2 | 1866.2  | 1867.7 |
| gdb 787 | 1871.2 <sup>a</sup> | 1872.1 | 1872.1  | 1870.8 | 1867.6 | 1867.6  | 1865.3 |
| gdb 788 | 1863.0 <sup>a</sup> | 1866.2 | 1866.2  | 1866.9 | 1866.4 | 1866.4  | 1867.1 |
| gdb 789 | 1868.4 <sup>a</sup> | 1867.9 | 1867.9  | 1865.5 | 1864.2 | 1864.1  | 1860.7 |
| gdb 790 | 1871.4 <sup>a</sup> | 1869.6 | 1869.6  | 1867.3 | 1866.2 | 1866.2  | 1863.2 |
| gdb 791 | 1869.6 <sup>a</sup> | 1873.4 | 1873.4  | 1872.0 | 1868.5 | 1868.5  | 1866.6 |
| gdb 792 | 1870.7 <sup>a</sup> | 1872.5 | 1872.5  | 1874.2 | 1870.2 | 1870.1  | 1871.3 |
| gdb 793 | 1864.4 <sup>a</sup> | 1867.4 | 1867.4  | 1868.7 | 1865.0 | 1865.0  | 1866.8 |
| gdb 794 | 1909.0 <sup>a</sup> | 1919.5 | 1919.5  | 1920.6 | 1921.1 | 1921.1  | 1922.4 |
| gdb 795 | 1886.9 <sup>a</sup> | 1893.0 | 1893.0  | 1895.3 | 1890.4 | 1890.4  | 1893.2 |
| gdb 796 | 1886.8 <sup>a</sup> | 1890.5 | 1890.5  | 1893.4 | 1888.0 | 1888.0  | 1891.8 |
| gdb 797 | 1886.9 <sup>a</sup> | 1891.2 | 1891.2  | 1894.2 | 1889.0 | 1889.0  | 1892.6 |
| gdb 798 | 1890.9 <sup>a</sup> | 1892.0 | 1892.0  | 1893.3 | 1889.6 | 1889.6  | 1890.8 |
| gdb 799 | 1889.4 <sup>a</sup> | 1891.8 | 1891.8  | 1893.1 | 1891.9 | 1891.9  | 1893.7 |
| gdb 800 | 1890.1 <sup>a</sup> | 1891.2 | 1891.1  | 1892.4 | 1890.4 | 1890.4  | 1892.7 |
| gdb 801 | 1891.2 <sup>a</sup> | 1891.7 | 1891.7  | 1893.0 | 1891.2 | 1891.2  | 1893.4 |
| gdb 802 | 1888.4 <sup>a</sup> | 1889.4 | 1889.4  | 1890.8 | 1889.3 | 1889.3  | 1891.8 |
| gdb 803 | 1896.8 <sup>a</sup> | 1893.9 | 1893.9  | 1891.8 | 1891.0 | 1891.0  | 1888.5 |
| gdb 804 | 1904.8 <sup>a</sup> | 1908.6 | 1908.6  | 1910.8 | 1905.9 | 1905.9  | 1908.9 |
| gdb 805 | 1905.4 <sup>a</sup> | 1915.2 | 1915.2  | 1916.2 | 1908.3 | 1908.3  | 1909.4 |
| gdb 806 | 1905.5 <sup>a</sup> | 1910.8 | 1910.8  | 1912.5 | 1907.9 | 1907.9  | 1910.3 |
| gdb 807 | 1892.6 <sup>a</sup> | 1903.0 | 1903.0  | 1905.2 | 1900.2 | 1900.2  | 1902.4 |
| gdb 808 | 1889.5 <sup>a</sup> | 1898.7 | 1898.7  | 1901.2 | 1896.4 | 1896.3  | 1899.4 |
| gdb 809 | 1890.5 <sup>a</sup> | 1901.4 | 1901.4  | 1904.2 | 1898.9 | 1898.8  | 1901.8 |
| gdb 810 | 1894.8 <sup>a</sup> | 1896.3 | 1896.3  | 1898.1 | 1894.5 | 1894.5  | 1896.5 |
| gdb 811 | 1892.8 <sup>a</sup> | 1894.7 | 1894.7  | 1896.4 | 1893.1 | 1893.1  | 1895.6 |
| gdb 812 | 1895.2 <sup>a</sup> | 1896.4 | 1896.4  | 1898.2 | 1895.5 | 1895.4  | 1898.6 |
| gdb 813 | 1895.3 <sup>a</sup> | 1895.7 | 1895.7  | 1897.7 | 1895.5 | 1895.5  | 1898.7 |
| gdb 814 | 1895.3 <sup>a</sup> | 1896.0 | 1896.0  | 1897.8 | 1895.4 | 1895.4  | 1898.5 |
| gdb 815 | 1885.3 <sup>a</sup> | 1888.6 | 1888.6  | 1891.7 | 1887.0 | 1887.0  | 1891.1 |
| gdb 816 | 1883.7 <sup>a</sup> | 1889.6 | 1889.6  | 1892.7 | 1888.0 | 1888.0  | 1891.5 |
| gdb 817 | 1889.3 <sup>a</sup> | 1889.6 | 1889.6  | 1891.1 | 1888.0 | 1888.0  | 1889.9 |
| gdb 818 | 1903.0 <sup>a</sup> | 1907.4 | 1907.4  | 1909.7 | 1905.5 | 1905.5  | 1908.7 |
| gdb 819 | 1886.6 <sup>a</sup> | 1888.3 | 1888.3  | 1889.8 | 1889.2 | 1889.2  | 1891.7 |
| gdb 820 | 1888.7 <sup>a</sup> | 1889.9 | 1889.9  | 1891.3 | 1890.4 | 1890.3  | 1892.7 |
| gdb 821 | 1868.8 <sup>a</sup> | 1871.9 | 1871.9  | 1870.8 | 1868.6 | 1868.5  | 1866.6 |
| gdb 822 | 1869.1 <sup>a</sup> | 1870.4 | 1870.4  | 1872.1 | 1869.2 | 1869.2  | 1870.5 |
| gdb 823 | 1887.5 <sup>a</sup> | 1892.9 | 1892.8  | 1894.3 | 1893.6 | 1893.6  | 1895.0 |
| gdb 824 | 1886.0 <sup>a</sup> | 1893.5 | 1893.5  | 1895.1 | 1892.8 | 1892.8  | 1894.4 |
| gdb 825 | 1890.9 <sup>a</sup> | 1894.4 | 1894.4  | 1892.5 | 1891.3 | 1891.3  | 1888.6 |
| gdb 826 | 1871.0 <sup>a</sup> | 1869.5 | 1869.5  | 1871.1 | 1868.9 | 1868.9  | 1870.5 |
| gdb 827 | 1867.8 <sup>a</sup> | 1866.8 | 1866.8  | 1868.3 | 1866.5 | 1866.5  | 1868.4 |
| gdb 828 | 1869.5 <sup>a</sup> | 1871.9 | 1871.9  | 1870.7 | 1868.2 | 1868.2  | 1866.0 |
| gdb 829 | 1869.2 <sup>a</sup> | 1868.1 | 1868.1  | 1865.8 | 1865.9 | 1865.9  | 1862.9 |
| gdb 830 | 1862.6 <sup>a</sup> | 1864.5 | 1864.5  | 1864.8 | 1865.6 | 1865.6  | 1866.4 |
| gdb 831 | 1867.5 <sup>a</sup> | 1867.6 | 1867.6  | 1865.3 | 1864.7 | 1864.7  | 1861.4 |
| gdb 832 | 1874.7 <sup>a</sup> | 1878.8 | 1878.8  | 1881.6 | 1877.2 | 1877.2  | 1879.4 |
| gdb 833 | 1874.9 <sup>a</sup> | 1877.6 | 1877.5  | 1880.1 | 1876.4 | 1876.3  | 1878.9 |
| gdb 834 | 1868.4 <sup>a</sup> | 1873.1 | 1873.1  | 1875.3 | 1872.0 | 1871.9  | 1875.0 |
| gdb 835 | 1888.9 <sup>a</sup> | 1890.3 | 1890.3  | 1892.1 | 1888.5 | 1888.5  | 1890.7 |
| gdb 836 | 1885.2 <sup>a</sup> | 1892.4 | 1892.4  | 1896.0 | 1890.5 | 1890.4  | 1894.0 |
| gdb 837 | 1904.5 <sup>a</sup> | 1908.5 | 1908.5  | 1911.0 | 1906.8 | 1906.8  | 1910.2 |
| gdb 838 | 1907.2 <sup>a</sup> | 1913.7 | 1913.7  | 1915.3 | 1911.1 | 1911.1  | 1912.9 |
| gdb 839 | 1903.8 <sup>a</sup> | 1908.5 | 1908.5  | 1911.0 | 1906.4 | 1906.4  | 1909.8 |
| gdb 840 | 1904.9 <sup>a</sup> | 1910.5 | 1910.5  | 1912.9 | 1908.3 | 1908.3  | 1911.1 |
| gdb 841 | 1889.9 <sup>a</sup> | 1901.7 | 1901.7  | 1904.3 | 1899.8 | 1899.8  | 1902.4 |
| gdb 842 | 1892.6 <sup>a</sup> | 1893.4 | 1893.4  | 1895.4 | 1892.7 | 1892.7  | 1895.5 |

... continued on next page ...

Table S73: ... continued from previous page ...

| Species | Ref.                | OM2    | OM2-D3T | ODM2   | OM3    | OM3-D3T | ODM3   |
|---------|---------------------|--------|---------|--------|--------|---------|--------|
| gdb 843 | 1890.8 <sup>a</sup> | 1900.0 | 1900.0  | 1902.7 | 1898.7 | 1898.7  | 1901.5 |
| gdb 844 | 1889.5 <sup>a</sup> | 1897.5 | 1897.5  | 1897.5 | 1899.9 | 1896.5  | 1899.5 |
| gdb 845 | 1890.5 <sup>a</sup> | 1899.7 | 1899.7  | 1902.5 | 1898.6 | 1898.5  | 1901.5 |
| gdb 846 | 1893.6 <sup>a</sup> | 1894.9 | 1894.9  | 1896.9 | 1894.2 | 1894.2  | 1896.3 |
| gdb 847 | 1917.8 <sup>a</sup> | 1926.1 | 1926.1  | 1926.7 | 1929.2 | 1929.2  | 1930.3 |
| gdb 848 | 1908.7 <sup>a</sup> | 1917.6 | 1917.9  | 1918.6 | 1921.3 | 1921.2  | 1922.7 |
| gdb 849 | 1873.5 <sup>a</sup> | 1877.9 | 1877.9  | 1880.6 | 1876.1 | 1876.1  | 1878.9 |
| gdb 850 | 1868.4 <sup>a</sup> | 1872.5 | 1872.5  | 1874.7 | 1870.8 | 1870.7  | 1873.2 |
| gdb 851 | 1872.3 <sup>a</sup> | 1876.9 | 1876.9  | 1879.5 | 1875.1 | 1875.0  | 1877.8 |
| gdb 852 | 1869.1 <sup>a</sup> | 1875.0 | 1875.0  | 1877.6 | 1873.0 | 1873.0  | 1875.6 |
| gdb 853 | 1869.2 <sup>a</sup> | 1872.1 | 1872.1  | 1870.7 | 1868.7 | 1868.7  | 1866.7 |
| gdb 854 | 1867.7 <sup>a</sup> | 1868.9 | 1868.9  | 1870.5 | 1867.8 | 1867.7  | 1869.6 |
| gdb 855 | 1866.4 <sup>a</sup> | 1868.5 | 1868.5  | 1870.3 | 1867.4 | 1867.4  | 1869.0 |
| gdb 856 | 1884.7 <sup>a</sup> | 1895.0 | 1895.0  | 1896.6 | 1893.7 | 1893.6  | 1895.1 |
| gdb 857 | 1885.7 <sup>a</sup> | 1893.4 | 1893.4  | 1895.1 | 1893.7 | 1893.7  | 1894.9 |
| gdb 858 | 1889.6 <sup>a</sup> | 1894.0 | 1894.0  | 1891.9 | 1891.0 | 1891.0  | 1888.8 |
| gdb 859 | 1884.7 <sup>a</sup> | 1890.9 | 1890.9  | 1892.4 | 1891.4 | 1891.3  | 1892.9 |
| gdb 860 | 1889.0 <sup>a</sup> | 1890.1 | 1890.1  | 1891.9 | 1888.4 | 1888.4  | 1890.5 |
| gdb 861 | 1883.3 <sup>a</sup> | 1889.5 | 1889.5  | 1893.0 | 1887.9 | 1887.9  | 1892.1 |
| gdb 862 | 1885.8 <sup>a</sup> | 1891.7 | 1891.7  | 1894.6 | 1889.6 | 1889.5  | 1893.4 |
| gdb 863 | 1885.9 <sup>a</sup> | 1891.4 | 1891.4  | 1892.2 | 1890.6 | 1890.6  | 1892.5 |
| gdb 864 | 1884.7 <sup>a</sup> | 1889.8 | 1889.8  | 1890.7 | 1889.7 | 1889.6  | 1891.8 |
| gdb 865 | 1893.7 <sup>a</sup> | 1892.4 | 1892.4  | 1890.6 | 1890.2 | 1890.2  | 1888.5 |
| gdb 866 | 1882.8 <sup>a</sup> | 1887.2 | 1887.2  | 1888.7 | 1887.2 | 1887.2  | 1890.0 |
| gdb 867 | 1892.4 <sup>a</sup> | 1893.5 | 1893.4  | 1895.4 | 1892.6 | 1892.5  | 1895.1 |
| gdb 868 | 1891.2 <sup>a</sup> | 1893.4 | 1893.3  | 1894.8 | 1892.4 | 1892.4  | 1895.2 |
| gdb 869 | 1888.8 <sup>a</sup> | 1899.2 | 1899.2  | 1902.4 | 1897.8 | 1897.7  | 1900.9 |
| gdb 870 | 1888.3 <sup>a</sup> | 1899.5 | 1899.5  | 1902.3 | 1897.8 | 1897.8  | 1900.5 |
| gdb 871 | 1890.4 <sup>a</sup> | 1894.8 | 1894.8  | 1896.3 | 1893.9 | 1893.8  | 1897.0 |
| gdb 872 | 1918.4 <sup>a</sup> | 1925.9 | 1925.9  | 1926.5 | 1929.1 | 1929.1  | 1930.3 |
| gdb 873 | 1889.4 <sup>a</sup> | 1894.4 | 1894.4  | 1892.3 | 1890.8 | 1890.8  | 1888.1 |
| gdb 874 | 1885.6 <sup>a</sup> | 1891.4 | 1891.4  | 1892.9 | 1891.5 | 1891.4  | 1893.2 |
| gdb 875 | 1883.7 <sup>a</sup> | 1893.2 | 1893.2  | 1894.7 | 1891.5 | 1891.5  | 1893.5 |
| gdb 876 | 1884.6 <sup>a</sup> | 1895.5 | 1895.5  | 1896.9 | 1893.5 | 1893.3  | 1894.7 |
| gdb 877 | 1908.2 <sup>a</sup> | 1918.1 | 1918.1  | 1918.6 | 1921.0 | 1921.4  | 1922.8 |
| gdb 878 | 1892.6 <sup>a</sup> | 1891.6 | 1891.6  | 1889.5 | 1889.3 | 1889.3  | 1887.3 |
| gdb 879 | 1884.1 <sup>a</sup> | 1887.9 | 1887.9  | 1889.4 | 1887.9 | 1887.9  | 1890.5 |
| gdb 880 | 1884.9 <sup>a</sup> | 1889.6 | 1889.6  | 1891.1 | 1889.1 | 1889.1  | 1891.6 |
| gdb 881 | 1885.9 <sup>a</sup> | 1891.2 | 1891.2  | 1892.0 | 1890.5 | 1890.4  | 1892.2 |
| gdb 882 | 1891.8 <sup>a</sup> | 1897.4 | 1897.4  | 1899.1 | 1896.4 | 1896.3  | 1899.9 |
| gdb 883 | 1888.4 <sup>a</sup> | 1893.5 | 1893.5  | 1895.7 | 1892.8 | 1892.8  | 1896.9 |
| gdb 884 | 1917.5 <sup>a</sup> | 1926.2 | 1926.2  | 1926.6 | 1928.7 | 1928.7  | 1929.4 |
| gdb 885 | 1888.6 <sup>a</sup> | 1893.5 | 1893.5  | 1895.5 | 1892.2 | 1892.2  | 1895.8 |
| gdb 886 | 1887.6 <sup>a</sup> | 1891.5 | 1891.5  | 1893.7 | 1890.8 | 1890.8  | 1894.6 |
| gdb 887 | 1890.0 <sup>a</sup> | 1895.3 | 1895.3  | 1896.9 | 1894.1 | 1894.1  | 1897.2 |
| gdb 888 | 1893.6 <sup>a</sup> | 1905.4 | 1905.3  | 1906.5 | 1907.5 | 1907.4  | 1908.1 |
| gdb 889 | 1891.2 <sup>a</sup> | 1901.3 | 1901.2  | 1901.7 | 1904.0 | 1903.6  | 1904.0 |
| gdb 890 | 1886.9 <sup>a</sup> | 1894.7 | 1894.7  | 1895.3 | 1898.0 | 1897.7  | 1898.9 |
| gdb 891 | 1867.9 <sup>a</sup> | 1867.5 | 1867.4  | 1865.2 | 1864.4 | 1864.3  | 1861.7 |
| gdb 892 | 1869.6 <sup>a</sup> | 1869.7 | 1869.7  | 1867.6 | 1866.4 | 1866.3  | 1863.5 |
| gdb 893 | 1880.2 <sup>a</sup> | 1876.1 | 1876.1  | 1877.1 | 1875.2 | 1874.2  | 1876.4 |
| gdb 894 | 1887.9 <sup>a</sup> | 1894.2 | 1894.2  | 1894.6 | 1897.7 | 1897.7  | 1898.9 |
| gdb 895 | 1892.6 <sup>a</sup> | 1901.1 | 1901.1  | 1902.8 | 1903.1 | 1903.0  | 1905.2 |
| gdb 896 | 1883.5 <sup>a</sup> | 1881.3 | 1881.3  | 1883.8 | 1880.5 | 1880.5  | 1883.4 |
| gdb 897 | 1880.9 <sup>a</sup> | 1878.1 | 1878.1  | 1881.1 | 1877.4 | 1877.4  | 1880.7 |
| gdb 898 | 1886.1 <sup>a</sup> | 1883.5 | 1883.5  | 1884.6 | 1881.6 | 1881.5  | 1882.5 |
| gdb 899 | 1903.7 <sup>a</sup> | 1890.8 | 1890.8  | 1893.8 | 1887.8 | 1887.7  | 1892.5 |
| gdb 900 | 1886.1 <sup>a</sup> | 1889.5 | 1889.5  | 1891.0 | 1890.3 | 1890.2  | 1892.3 |
| gdb 901 | 1886.9 <sup>a</sup> | 1890.3 | 1890.2  | 1891.6 | 1890.1 | 1890.1  | 1892.6 |
| gdb 902 | 1883.9 <sup>a</sup> | 1887.2 | 1887.2  | 1888.8 | 1887.8 | 1887.8  | 1890.3 |
| gdb 903 | 1894.6 <sup>a</sup> | 1892.8 | 1892.8  | 1890.8 | 1890.5 | 1890.5  | 1888.2 |
| gdb 904 | 1901.6 <sup>a</sup> | 1895.0 | 1895.0  | 1894.4 | 1894.2 | 1894.2  | 1896.5 |
| gdb 905 | 1871.7 <sup>a</sup> | 1874.1 | 1874.1  | 1876.7 | 1873.0 | 1872.9  | 1875.8 |
| gdb 906 | 1869.0 <sup>a</sup> | 1871.3 | 1871.3  | 1874.0 | 1870.3 | 1870.3  | 1873.5 |
| gdb 907 | 1887.9 <sup>a</sup> | 1888.5 | 1888.5  | 1891.5 | 1885.0 | 1885.0  | 1889.3 |

... continued on next page ...

Table S73: ... continued from previous page ...

| Species | Ref.                | OM2    | OM2-D3T | ODM2   | OM3    | OM3-D3T | ODM3   |
|---------|---------------------|--------|---------|--------|--------|---------|--------|
| gdb 908 | 1895.0 <sup>a</sup> | 1899.1 | 1899.0  | 1900.6 | 1898.8 | 1898.8  | 1902.0 |
| gdb 909 | 1895.3 <sup>a</sup> | 1899.3 | 1899.3  | 1900.9 | 1899.0 | 1898.8  | 1902.2 |
| gdb 910 | 1879.7 <sup>a</sup> | 1875.7 | 1875.7  | 1878.7 | 1875.5 | 1875.5  | 1879.0 |
| gdb 911 | 1881.8 <sup>a</sup> | 1877.9 | 1877.8  | 1879.0 | 1876.7 | 1876.6  | 1877.9 |
| gdb 912 | 1903.5 <sup>a</sup> | 1889.2 | 1889.0  | 1891.9 | 1886.4 | 1886.3  | 1891.2 |
| gdb 913 | 1882.6 <sup>a</sup> | 1886.5 | 1886.5  | 1888.0 | 1887.6 | 1887.6  | 1889.8 |
| gdb 914 | 1885.8 <sup>a</sup> | 1889.2 | 1889.1  | 1890.9 | 1890.0 | 1890.0  | 1892.4 |
| gdb 915 | 1902.5 <sup>a</sup> | 1895.6 | 1895.6  | 1896.2 | 1895.5 | 1895.4  | 1898.0 |
| gdb 916 | 1890.0 <sup>a</sup> | 1899.2 | 1899.1  | 1900.8 | 1902.5 | 1902.4  | 1904.6 |
| gdb 917 | 1866.5 <sup>a</sup> | 1863.2 | 1863.1  | 1865.2 | 1864.8 | 1864.7  | 1867.0 |
| gdb 918 | 1863.1 <sup>a</sup> | 1864.2 | 1864.2  | 1865.1 | 1864.4 | 1864.4  | 1866.4 |
| gdb 919 | 1872.0 <sup>a</sup> | 1874.2 | 1874.2  | 1873.1 | 1871.3 | 1871.3  | 1869.5 |
| gdb 920 | 1880.5 <sup>a</sup> | 1877.7 | 1877.7  | 1879.1 | 1876.7 | 1876.6  | 1879.7 |
| gdb 921 | 1865.9 <sup>a</sup> | 1865.6 | 1865.6  | 1863.1 | 1863.8 | 1863.7  | 1860.9 |
| gdb 922 | 1867.7 <sup>a</sup> | 1868.5 | 1868.5  | 1866.2 | 1866.0 | 1866.0  | 1863.0 |
| gdb 923 | 1879.0 <sup>a</sup> | 1873.7 | 1873.7  | 1874.1 | 1872.9 | 1872.9  | 1874.5 |
| gdb 924 | 1887.3 <sup>a</sup> | 1893.5 | 1893.5  | 1893.8 | 1898.3 | 1898.3  | 1899.4 |
| gdb 925 | 1868.2 <sup>a</sup> | 1867.1 | 1867.1  | 1869.0 | 1868.4 | 1868.4  | 1870.2 |
| gdb 926 | 1869.8 <sup>a</sup> | 1872.7 | 1872.7  | 1871.4 | 1870.2 | 1870.1  | 1868.6 |
| gdb 927 | 1885.3 <sup>a</sup> | 1884.4 | 1884.4  | 1885.6 | 1881.9 | 1881.8  | 1884.8 |
| gdb 928 | 1881.5 <sup>a</sup> | 1879.4 | 1879.4  | 1881.2 | 1877.8 | 1877.8  | 1879.5 |
| gdb 929 | 1880.9 <sup>a</sup> | 1879.3 | 1879.3  | 1882.5 | 1878.7 | 1878.7  | 1882.2 |
| gdb 930 | 1902.3 <sup>a</sup> | 1890.4 | 1890.4  | 1893.2 | 1887.7 | 1887.7  | 1892.6 |
| gdb 931 | 1884.8 <sup>a</sup> | 1890.5 | 1890.5  | 1892.3 | 1890.9 | 1890.9  | 1893.0 |
| gdb 932 | 1891.4 <sup>a</sup> | 1890.6 | 1890.6  | 1888.9 | 1888.7 | 1888.6  | 1887.0 |
| gdb 933 | 1905.7 <sup>a</sup> | 1902.4 | 1902.4  | 1902.8 | 1900.7 | 1900.7  | 1903.0 |
| gdb 934 | 1868.1 <sup>a</sup> | 1869.5 | 1869.5  | 1872.5 | 1868.7 | 1868.6  | 1872.2 |
| gdb 935 | 1868.0 <sup>a</sup> | 1869.1 | 1869.1  | 1872.2 | 1868.9 | 1868.8  | 1872.5 |
| gdb 936 | 1870.1 <sup>a</sup> | 1872.5 | 1872.5  | 1875.5 | 1871.9 | 1871.9  | 1875.1 |
| gdb 937 | 1884.9 <sup>a</sup> | 1886.2 | 1886.2  | 1888.7 | 1883.1 | 1883.0  | 1887.3 |
| gdb 938 | 1915.3 <sup>a</sup> | 1925.8 | 1925.8  | 1926.3 | 1930.1 | 1930.1  | 1931.4 |
| gdb 939 | 1870.3 <sup>a</sup> | 1873.2 | 1873.2  | 1872.1 | 1870.4 | 1870.4  | 1868.7 |
| gdb 940 | 1865.3 <sup>a</sup> | 1864.0 | 1864.0  | 1865.7 | 1865.5 | 1865.5  | 1867.5 |
| gdb 941 | 1866.3 <sup>a</sup> | 1869.6 | 1869.6  | 1870.7 | 1869.0 | 1868.9  | 1870.5 |
| gdb 942 | 1886.3 <sup>a</sup> | 1885.0 | 1884.9  | 1886.5 | 1882.1 | 1882.0  | 1885.0 |
| gdb 943 | 1891.4 <sup>a</sup> | 1900.2 | 1900.1  | 1901.8 | 1903.3 | 1903.3  | 1905.6 |
| gdb 944 | 1890.9 <sup>a</sup> | 1891.0 | 1891.0  | 1889.3 | 1888.2 | 1888.2  | 1886.4 |
| gdb 945 | 1883.5 <sup>a</sup> | 1887.2 | 1887.2  | 1889.2 | 1886.8 | 1886.8  | 1889.1 |
| gdb 946 | 1887.7 <sup>a</sup> | 1894.0 | 1894.0  | 1895.6 | 1893.6 | 1893.6  | 1895.7 |
| gdb 947 | 1907.1 <sup>a</sup> | 1902.1 | 1901.9  | 1902.3 | 1900.1 | 1900.0  | 1902.3 |
| gdb 948 | 1895.9 <sup>a</sup> | 1900.0 | 1900.0  | 1901.3 | 1899.6 | 1899.6  | 1902.9 |
| gdb 949 | 1917.1 <sup>a</sup> | 1911.1 | 1911.1  | 1911.9 | 1909.1 | 1909.1  | 1912.6 |
| gdb 950 | 1915.8 <sup>a</sup> | 1926.1 | 1926.1  | 1926.6 | 1930.0 | 1930.0  | 1930.9 |
| gdb 951 | 1892.9 <sup>a</sup> | 1896.4 | 1896.4  | 1898.5 | 1896.1 | 1896.1  | 1899.9 |
| gdb 952 | 1895.2 <sup>a</sup> | 1900.0 | 1900.0  | 1901.2 | 1899.4 | 1899.4  | 1902.6 |
| gdb 953 | 1915.8 <sup>a</sup> | 1910.2 | 1910.2  | 1910.9 | 1908.1 | 1908.1  | 1911.5 |
| gdb 954 | 1895.4 <sup>a</sup> | 1903.5 | 1903.5  | 1903.5 | 1906.5 | 1906.5  | 1905.8 |
| gdb 955 | 1892.5 <sup>a</sup> | 1896.5 | 1896.5  | 1896.8 | 1899.6 | 1899.5  | 1900.3 |
| gdb 956 | 1853.1 <sup>a</sup> | 1841.0 | 1841.0  | 1842.1 | 1841.4 | 1841.4  | 1841.7 |
| gdb 957 | 1855.7 <sup>a</sup> | 1839.8 | 1839.8  | 1843.0 | 1840.0 | 1840.0  | 1843.9 |
| gdb 958 | 1873.8 <sup>a</sup> | 1849.6 | 1849.4  | 1853.2 | 1848.8 | 1848.7  | 1853.5 |
| gdb 959 | 1864.0 <sup>a</sup> | 1854.3 | 1854.3  | 1856.1 | 1856.8 | 1856.7  | 1858.8 |
| gdb 960 | 1860.9 <sup>a</sup> | 1852.2 | 1852.2  | 1853.8 | 1854.5 | 1854.5  | 1856.8 |
| gdb 961 | 1869.4 <sup>a</sup> | 1865.2 | 1865.2  | 1864.0 | 1863.3 | 1863.3  | 1861.7 |
| gdb 962 | 1861.3 <sup>a</sup> | 1860.2 | 1860.2  | 1861.5 | 1860.8 | 1860.8  | 1863.3 |
| gdb 963 | 1883.8 <sup>a</sup> | 1873.0 | 1873.0  | 1874.7 | 1871.3 | 1871.3  | 1874.6 |
| gdb 964 | 1890.6 <sup>a</sup> | 1898.0 | 1898.0  | 1899.5 | 1898.2 | 1898.2  | 1901.0 |
| gdb 965 | 1910.9 <sup>a</sup> | 1907.0 | 1906.9  | 1907.9 | 1905.2 | 1905.2  | 1908.3 |
| gdb 966 | 1847.5 <sup>a</sup> | 1837.5 | 1837.5  | 1838.8 | 1838.0 | 1838.0  | 1838.6 |
| gdb 967 | 1851.8 <sup>a</sup> | 1839.0 | 1839.0  | 1842.2 | 1839.5 | 1839.5  | 1843.7 |
| gdb 968 | 1870.1 <sup>a</sup> | 1846.9 | 1846.5  | 1850.9 | 1846.7 | 1846.6  | 1851.9 |
| gdb 969 | 1859.4 <sup>a</sup> | 1850.7 | 1850.7  | 1852.8 | 1853.1 | 1853.1  | 1855.7 |
| gdb 970 | 1858.1 <sup>a</sup> | 1858.3 | 1858.3  | 1859.4 | 1858.8 | 1858.7  | 1861.3 |
| gdb 971 | 1881.9 <sup>a</sup> | 1871.7 | 1871.7  | 1874.0 | 1870.3 | 1870.3  | 1873.9 |
| gdb 972 | 1896.0 <sup>a</sup> | 1902.5 | 1902.4  | 1904.1 | 1907.2 | 1907.2  | 1909.3 |

... continued on next page ...

Table S73: ... continued from previous page ...

| Species  | Ref.                | OM2    | OM2-D3T | ODM2   | OM3    | OM3-D3T | ODM3   |
|----------|---------------------|--------|---------|--------|--------|---------|--------|
| gdb 973  | 1890.3 <sup>a</sup> | 1895.1 | 1895.1  | 1895.4 | 1899.5 | 1899.5  | 1900.4 |
| gdb 974  | 1865.2 <sup>a</sup> | 1862.7 | 1862.7  | 1861.8 | 1860.9 | 1860.9  | 1859.7 |
| gdb 975  | 1863.7 <sup>a</sup> | 1855.4 | 1855.4  | 1857.6 | 1857.5 | 1857.5  | 1859.8 |
| gdb 976  | 1861.3 <sup>a</sup> | 1863.2 | 1863.2  | 1864.1 | 1862.5 | 1862.5  | 1864.9 |
| gdb 977  | 1882.4 <sup>a</sup> | 1872.7 | 1872.7  | 1875.1 | 1871.1 | 1871.1  | 1874.6 |
| gdb 978  | 1889.5 <sup>a</sup> | 1897.6 | 1897.6  | 1897.9 | 1896.7 | 1896.7  | 1899.4 |
| gdb 979  | 1910.1 <sup>a</sup> | 1905.9 | 1905.8  | 1907.5 | 1904.0 | 1903.9  | 1907.8 |
| gdb 980  | 1895.9 <sup>a</sup> | 1902.8 | 1902.8  | 1904.3 | 1907.0 | 1907.0  | 1908.8 |
| gdb 981  | 1892.6 <sup>a</sup> | 1899.2 | 1899.2  | 1901.2 | 1899.1 | 1899.1  | 1902.2 |
| gdb 982  | 1889.3 <sup>a</sup> | 1896.2 | 1896.2  | 1896.4 | 1895.2 | 1895.2  | 1897.9 |
| gdb 983  | 1910.1 <sup>a</sup> | 1905.8 | 1905.7  | 1907.0 | 1903.8 | 1903.7  | 1907.5 |
| gdb 984  | 1857.6 <sup>a</sup> | 1861.6 | 1861.6  | 1861.6 | 1861.2 | 1861.2  | 1863.9 |
| gdb 985  | 1860.9 <sup>a</sup> | 1864.9 | 1864.9  | 1864.8 | 1864.2 | 1864.2  | 1866.8 |
| gdb 986  | 1859.6 <sup>a</sup> | 1864.2 | 1864.2  | 1864.3 | 1863.2 | 1863.2  | 1865.8 |
| gdb 987  | 1882.0 <sup>a</sup> | 1875.3 | 1875.3  | 1876.9 | 1873.6 | 1873.6  | 1877.0 |
| gdb 988  | 1883.6 <sup>a</sup> | 1893.2 | 1893.2  | 1894.8 | 1892.4 | 1892.4  | 1891.8 |
| gdb 989  | 1883.0 <sup>a</sup> | 1888.5 | 1888.5  | 1889.8 | 1889.9 | 1889.8  | 1889.1 |
| gdb 990  | 1886.8 <sup>a</sup> | 1886.1 | 1886.1  | 1886.8 | 1883.1 | 1883.1  | 1885.2 |
| gdb 991  | 1883.4 <sup>a</sup> | 1894.7 | 1894.7  | 1896.0 | 1894.0 | 1894.0  | 1893.3 |
| gdb 992  | 1857.4 <sup>a</sup> | 1859.9 | 1859.9  | 1858.5 | 1853.7 | 1853.7  | 1849.7 |
| gdb 993  | 1888.9 <sup>a</sup> | 1889.5 | 1889.5  | 1890.7 | 1886.0 | 1886.0  | 1888.9 |
| gdb 994  | 1880.0 <sup>a</sup> | 1888.1 | 1888.0  | 1889.7 | 1888.0 | 1888.0  | 1888.3 |
| gdb 995  | 1874.2 <sup>a</sup> | 1879.3 | 1879.3  | 1882.5 | 1881.3 | 1881.3  | 1882.8 |
| gdb 996  | 1874.8 <sup>a</sup> | 1882.4 | 1882.4  | 1885.1 | 1883.6 | 1883.6  | 1884.7 |
| gdb 997  | 1856.3 <sup>a</sup> | 1856.3 | 1856.2  | 1856.4 | 1850.9 | 1850.9  | 1848.1 |
| gdb 998  | 1860.3 <sup>a</sup> | 1862.3 | 1862.3  | 1865.2 | 1863.7 | 1863.7  | 1862.8 |
| gdb 999  | 1853.6 <sup>a</sup> | 1858.4 | 1858.4  | 1862.0 | 1860.4 | 1860.4  | 1860.6 |
| gdb 1000 | 1855.1 <sup>a</sup> | 1855.3 | 1855.3  | 1855.1 | 1850.7 | 1850.6  | 1847.6 |
| gdb 1001 | 1853.5 <sup>a</sup> | 1853.1 | 1853.1  | 1857.3 | 1850.7 | 1850.7  | 1852.8 |
| gdb 1002 | 1851.9 <sup>a</sup> | 1851.3 | 1851.3  | 1855.0 | 1849.2 | 1849.2  | 1851.4 |
| gdb 1003 | 1893.0 <sup>a</sup> | 1893.3 | 1893.3  | 1893.7 | 1891.3 | 1890.8  | 1892.7 |
| gdb 1004 | 1880.6 <sup>a</sup> | 1888.6 | 1888.6  | 1890.8 | 1890.4 | 1890.4  | 1890.5 |
| gdb 1005 | 1851.9 <sup>a</sup> | 1853.1 | 1853.0  | 1852.7 | 1849.1 | 1849.1  | 1846.2 |
| gdb 1006 | 1886.6 <sup>a</sup> | 1881.9 | 1881.7  | 1883.5 | 1879.9 | 1879.7  | 1883.0 |
| gdb 1007 | 1865.9 <sup>a</sup> | 1873.7 | 1873.7  | 1873.8 | 1872.2 | 1872.2  | 1874.0 |
| gdb 1008 | 1874.0 <sup>a</sup> | 1880.5 | 1880.5  | 1882.9 | 1883.2 | 1883.1  | 1884.0 |
| gdb 1009 | 1875.3 <sup>a</sup> | 1881.2 | 1881.2  | 1884.2 | 1883.0 | 1883.0  | 1884.5 |
| gdb 1010 | 1859.3 <sup>a</sup> | 1855.3 | 1855.3  | 1858.1 | 1858.0 | 1858.0  | 1857.8 |
| gdb 1011 | 1857.8 <sup>a</sup> | 1854.7 | 1854.7  | 1856.6 | 1857.7 | 1857.7  | 1857.2 |
| gdb 1012 | 1864.3 <sup>a</sup> | 1873.0 | 1873.0  | 1877.3 | 1872.6 | 1872.5  | 1873.1 |
| gdb 1013 | 1860.9 <sup>a</sup> | 1858.1 | 1858.1  | 1860.8 | 1861.0 | 1861.0  | 1860.7 |
| gdb 1014 | 1858.8 <sup>a</sup> | 1859.5 | 1859.5  | 1861.9 | 1856.0 | 1856.0  | 1857.0 |
| gdb 1015 | 1866.1 <sup>a</sup> | 1873.6 | 1873.6  | 1877.8 | 1872.6 | 1872.6  | 1872.5 |
| gdb 1016 | 1858.4 <sup>a</sup> | 1860.6 | 1860.6  | 1863.4 | 1856.9 | 1856.9  | 1858.0 |
| gdb 1017 | 1869.9 <sup>a</sup> | 1880.1 | 1880.1  | 1881.6 | 1870.7 | 1870.7  | 1873.6 |
| gdb 1018 | 1871.6 <sup>a</sup> | 1882.8 | 1882.8  | 1884.2 | 1873.7 | 1873.7  | 1876.0 |
| gdb 1019 | 1871.1 <sup>a</sup> | 1881.3 | 1881.3  | 1883.8 | 1877.8 | 1877.8  | 1878.9 |
| gdb 1020 | 1857.4 <sup>a</sup> | 1855.0 | 1855.0  | 1855.0 | 1850.2 | 1850.2  | 1847.1 |
| gdb 1021 | 1861.8 <sup>a</sup> | 1857.2 | 1857.2  | 1859.8 | 1860.4 | 1860.4  | 1860.3 |
| gdb 1022 | 1863.9 <sup>a</sup> | 1868.5 | 1868.5  | 1872.1 | 1868.5 | 1868.5  | 1869.7 |
| gdb 1023 | 1865.8 <sup>a</sup> | 1869.1 | 1869.1  | 1872.7 | 1869.4 | 1869.4  | 1870.3 |
| gdb 1024 | 1859.5 <sup>a</sup> | 1858.6 | 1858.6  | 1862.7 | 1856.0 | 1855.9  | 1857.8 |
| gdb 1025 | 1855.3 <sup>a</sup> | 1853.5 | 1853.5  | 1853.5 | 1849.7 | 1849.7  | 1846.7 |
| gdb 1026 | 1870.3 <sup>a</sup> | 1877.9 | 1877.9  | 1880.4 | 1875.6 | 1875.6  | 1877.0 |
| gdb 1027 | 1870.9 <sup>a</sup> | 1880.2 | 1880.1  | 1883.0 | 1872.1 | 1872.0  | 1875.6 |
| gdb 1028 | 1868.6 <sup>a</sup> | 1879.7 | 1879.6  | 1882.1 | 1871.0 | 1870.9  | 1874.1 |
| gdb 1029 | 1860.7 <sup>a</sup> | 1861.3 | 1861.3  | 1864.2 | 1858.1 | 1858.0  | 1859.3 |
| gdb 1030 | 1871.2 <sup>a</sup> | 1877.1 | 1877.1  | 1879.7 | 1875.1 | 1875.1  | 1876.6 |
| gdb 1031 | 1871.6 <sup>a</sup> | 1878.8 | 1878.2  | 1881.2 | 1876.1 | 1876.1  | 1877.2 |
| gdb 1032 | 1869.9 <sup>a</sup> | 1878.7 | 1878.7  | 1880.5 | 1870.1 | 1870.1  | 1873.2 |
| gdb 1033 | 1869.1 <sup>a</sup> | 1871.0 | 1871.0  | 1872.7 | 1863.8 | 1863.8  | 1868.4 |
| gdb 1034 | 1864.0 <sup>a</sup> | 1864.8 | 1864.8  | 1867.5 | 1860.3 | 1860.3  | 1863.8 |
| gdb 1035 | 1868.5 <sup>a</sup> | 1868.3 | 1868.3  | 1870.7 | 1861.7 | 1861.7  | 1866.7 |
| gdb 1036 | 1867.4 <sup>a</sup> | 1870.2 | 1870.2  | 1871.4 | 1863.4 | 1863.4  | 1867.5 |
| gdb 1037 | 1881.5 <sup>a</sup> | 1888.3 | 1888.2  | 1889.4 | 1889.2 | 1889.2  | 1888.8 |

... continued on next page ...

Table S73: ... continued from previous page ...

| Species  | Ref.                | OM2    | OM2-D3T | ODM2   | OM3    | OM3-D3T | ODM3   |
|----------|---------------------|--------|---------|--------|--------|---------|--------|
| gdb 1038 | 1881.7 <sup>a</sup> | 1884.9 | 1884.9  | 1886.9 | 1886.3 | 1886.3  | 1886.8 |
| gdb 1039 | 1883.0 <sup>a</sup> | 1886.5 | 1886.5  | 1888.8 | 1888.9 | 1888.8  | 1888.7 |
| gdb 1040 | 1855.4 <sup>a</sup> | 1853.5 | 1853.5  | 1852.3 | 1849.4 | 1849.4  | 1846.1 |
| gdb 1041 | 1889.6 <sup>a</sup> | 1884.6 | 1884.5  | 1885.9 | 1883.1 | 1883.1  | 1885.9 |
| gdb 1042 | 1874.5 <sup>a</sup> | 1881.7 | 1881.7  | 1881.8 | 1882.6 | 1884.6  | 1884.0 |
| gdb 1043 | 1859.4 <sup>a</sup> | 1855.0 | 1855.0  | 1858.6 | 1859.1 | 1859.1  | 1859.0 |
| gdb 1044 | 1856.2 <sup>a</sup> | 1854.4 | 1854.4  | 1858.1 | 1853.0 | 1852.9  | 1855.4 |
| gdb 1045 | 1856.2 <sup>a</sup> | 1854.0 | 1854.0  | 1856.6 | 1858.0 | 1857.9  | 1857.9 |
| gdb 1046 | 1854.4 <sup>a</sup> | 1852.0 | 1852.0  | 1856.2 | 1851.6 | 1851.6  | 1854.3 |
| gdb 1047 | 1866.8 <sup>a</sup> | 1872.4 | 1872.4  | 1874.7 | 1865.6 | 1865.6  | 1869.2 |
| gdb 1048 | 1868.9 <sup>a</sup> | 1875.4 | 1875.4  | 1877.6 | 1868.5 | 1868.5  | 1871.5 |
| gdb 1049 | 1874.4 <sup>a</sup> | 1878.3 | 1878.3  | 1879.7 | 1881.0 | 1881.0  | 1881.5 |
| gdb 1050 | 1864.3 <sup>a</sup> | 1869.9 | 1869.9  | 1870.1 | 1869.1 | 1869.1  | 1870.6 |
| gdb 1051 | 1843.8 <sup>a</sup> | 1843.3 | 1843.3  | 1846.8 | 1844.3 | 1844.2  | 1845.2 |
| gdb 1052 | 1840.3 <sup>a</sup> | 1839.0 | 1839.0  | 1840.5 | 1834.8 | 1834.8  | 1837.9 |
| gdb 1053 | 1892.6 <sup>a</sup> | 1889.2 | 1889.2  | 1890.3 | 1888.3 | 1888.3  | 1890.8 |
| gdb 1054 | 1869.0 <sup>a</sup> | 1875.8 | 1875.5  | 1878.4 | 1874.9 | 1874.6  | 1877.5 |
| gdb 1055 | 1839.1 <sup>a</sup> | 1838.2 | 1838.2  | 1835.1 | 1831.6 | 1831.6  | 1829.6 |
| gdb 1056 | 1885.5 <sup>a</sup> | 1880.0 | 1879.6  | 1881.0 | 1878.8 | 1878.7  | 1881.5 |
| gdb 1057 | 1864.0 <sup>a</sup> | 1869.2 | 1869.2  | 1868.9 | 1868.9 | 1868.9  | 1870.5 |
| gdb 1058 | 1861.4 <sup>a</sup> | 1866.4 | 1866.4  | 1866.0 | 1866.9 | 1866.9  | 1868.7 |
| gdb 1059 | 1882.1 <sup>a</sup> | 1893.3 | 1893.3  | 1894.4 | 1892.9 | 1892.9  | 1892.0 |
| gdb 1060 | 1898.2 <sup>a</sup> | 1909.4 | 1909.4  | 1909.1 | 1910.1 | 1910.1  | 1908.6 |
| gdb 1061 | 1897.6 <sup>a</sup> | 1909.3 | 1909.3  | 1909.8 | 1910.5 | 1910.5  | 1909.9 |
| gdb 1062 | 1895.4 <sup>a</sup> | 1905.6 | 1905.5  | 1904.6 | 1907.6 | 1907.5  | 1906.2 |
| gdb 1063 | 1884.1 <sup>a</sup> | 1891.2 | 1891.2  | 1893.4 | 1890.3 | 1890.3  | 1891.1 |
| gdb 1064 | 1893.2 <sup>a</sup> | 1903.8 | 1903.8  | 1904.2 | 1905.7 | 1905.6  | 1905.6 |
| gdb 1065 | 1855.3 <sup>a</sup> | 1849.4 | 1849.4  | 1850.2 | 1847.1 | 1847.1  | 1846.6 |
| gdb 1066 | 1867.5 <sup>a</sup> | 1858.4 | 1858.4  | 1862.2 | 1859.8 | 1859.8  | 1861.0 |
| gdb 1067 | 1871.2 <sup>a</sup> | 1862.7 | 1862.7  | 1864.4 | 1861.9 | 1861.9  | 1863.2 |
| gdb 1068 | 1876.4 <sup>a</sup> | 1878.3 | 1878.3  | 1880.6 | 1879.9 | 1879.9  | 1879.9 |
| gdb 1069 | 1906.0 <sup>a</sup> | 1915.5 | 1915.5  | 1916.9 | 1917.4 | 1917.4  | 1918.5 |
| gdb 1070 | 1899.5 <sup>a</sup> | 1906.7 | 1906.7  | 1906.7 | 1908.3 | 1908.3  | 1907.9 |
| gdb 1071 | 1874.5 <sup>a</sup> | 1876.0 | 1876.0  | 1874.6 | 1871.1 | 1871.1  | 1868.8 |
| gdb 1072 | 1873.7 <sup>a</sup> | 1869.2 | 1869.2  | 1871.0 | 1868.4 | 1868.4  | 1869.3 |
| gdb 1073 | 1882.3 <sup>a</sup> | 1885.7 | 1885.7  | 1887.6 | 1885.8 | 1885.7  | 1885.6 |
| gdb 1074 | 1909.8 <sup>a</sup> | 1920.1 | 1920.1  | 1921.8 | 1920.1 | 1920.1  | 1921.1 |
| gdb 1075 | 1906.8 <sup>a</sup> | 1916.6 | 1916.6  | 1917.9 | 1917.7 | 1917.7  | 1918.5 |
| gdb 1076 | 1903.3 <sup>a</sup> | 1914.1 | 1914.1  | 1915.7 | 1910.6 | 1910.5  | 1912.5 |
| gdb 1077 | 1908.7 <sup>a</sup> | 1918.8 | 1918.8  | 1920.2 | 1918.5 | 1918.5  | 1918.7 |
| gdb 1078 | 1902.8 <sup>a</sup> | 1913.9 | 1913.9  | 1913.7 | 1914.7 | 1914.7  | 1913.6 |
| gdb 1079 | 1875.8 <sup>a</sup> | 1877.2 | 1877.2  | 1874.6 | 1872.5 | 1872.5  | 1868.5 |
| gdb 1080 | 1875.4 <sup>a</sup> | 1877.8 | 1877.8  | 1875.2 | 1873.2 | 1873.2  | 1868.9 |
| gdb 1081 | 1896.2 <sup>a</sup> | 1905.4 | 1905.4  | 1905.6 | 1907.1 | 1907.1  | 1907.1 |
| gdb 1082 | 1897.3 <sup>a</sup> | 1910.0 | 1910.0  | 1911.1 | 1910.4 | 1910.4  | 1911.5 |
| gdb 1083 | 1864.3 <sup>a</sup> | 1853.4 | 1853.4  | 1854.4 | 1852.0 | 1852.0  | 1850.4 |
| gdb 1084 | 1874.6 <sup>a</sup> | 1857.9 | 1857.9  | 1861.5 | 1860.6 | 1860.6  | 1861.8 |
| gdb 1085 | 1888.3 <sup>a</sup> | 1888.2 | 1888.2  | 1890.6 | 1886.1 | 1886.1  | 1887.8 |
| gdb 1086 | 1886.9 <sup>a</sup> | 1886.1 | 1886.1  | 1888.8 | 1884.1 | 1884.1  | 1886.2 |
| gdb 1087 | 1891.2 <sup>a</sup> | 1890.2 | 1890.2  | 1891.1 | 1887.2 | 1887.1  | 1887.0 |
| gdb 1088 | 1875.9 <sup>a</sup> | 1867.9 | 1867.9  | 1869.3 | 1868.4 | 1868.4  | 1869.0 |
| gdb 1089 | 1876.9 <sup>a</sup> | 1867.2 | 1867.2  | 1868.6 | 1867.4 | 1867.4  | 1868.5 |
| gdb 1090 | 1885.1 <sup>a</sup> | 1881.7 | 1881.7  | 1883.9 | 1884.1 | 1884.1  | 1884.3 |
| gdb 1091 | 1882.0 <sup>a</sup> | 1878.7 | 1878.7  | 1877.2 | 1874.8 | 1874.7  | 1871.7 |
| gdb 1092 | 1894.6 <sup>a</sup> | 1900.0 | 1900.0  | 1901.4 | 1899.3 | 1899.3  | 1900.0 |
| gdb 1093 | 1895.7 <sup>a</sup> | 1901.1 | 1901.1  | 1902.4 | 1899.4 | 1899.4  | 1900.5 |
| gdb 1094 | 1893.3 <sup>a</sup> | 1898.1 | 1898.1  | 1899.6 | 1896.9 | 1896.9  | 1897.9 |
| gdb 1095 | 1901.4 <sup>a</sup> | 1901.4 | 1901.3  | 1899.0 | 1897.6 | 1897.6  | 1894.0 |
| gdb 1096 | 1877.6 <sup>a</sup> | 1880.9 | 1880.9  | 1883.2 | 1878.4 | 1878.4  | 1880.1 |
| gdb 1097 | 1875.3 <sup>a</sup> | 1878.6 | 1878.6  | 1880.9 | 1876.4 | 1876.4  | 1878.7 |
| gdb 1098 | 1902.0 <sup>a</sup> | 1913.3 | 1913.3  | 1915.2 | 1911.2 | 1911.2  | 1912.6 |
| gdb 1099 | 1901.4 <sup>a</sup> | 1908.6 | 1908.6  | 1909.8 | 1906.8 | 1906.8  | 1908.7 |
| gdb 1100 | 1901.9 <sup>a</sup> | 1908.4 | 1908.4  | 1909.6 | 1906.9 | 1906.8  | 1908.8 |
| gdb 1101 | 1861.6 <sup>a</sup> | 1852.3 | 1852.3  | 1853.1 | 1851.2 | 1851.1  | 1850.5 |
| gdb 1102 | 1872.6 <sup>a</sup> | 1857.2 | 1857.2  | 1861.4 | 1860.3 | 1860.3  | 1862.3 |

... continued on next page ...

Table S73: ... continued from previous page ...

| Species  | Ref.                | OM2    | OM2-D3T | ODM2   | OM3    | OM3-D3T | ODM3   |
|----------|---------------------|--------|---------|--------|--------|---------|--------|
| gdb 1103 | 1886.6 <sup>a</sup> | 1885.2 | 1885.1  | 1888.2 | 1883.8 | 1883.8  | 1886.5 |
| gdb 1104 | 1887.7 <sup>a</sup> | 1886.9 | 1886.9  | 1886.9 | 1888.0 | 1884.5  | 1885.0 |
| gdb 1105 | 1884.5 <sup>a</sup> | 1881.0 | 1881.0  | 1884.2 | 1882.7 | 1882.7  | 1883.3 |
| gdb 1106 | 1875.6 <sup>a</sup> | 1866.9 | 1866.9  | 1869.0 | 1867.5 | 1867.5  | 1868.9 |
| gdb 1107 | 1869.5 <sup>a</sup> | 1862.1 | 1862.1  | 1863.3 | 1862.7 | 1862.7  | 1864.1 |
| gdb 1108 | 1893.2 <sup>a</sup> | 1898.3 | 1898.3  | 1900.0 | 1898.1 | 1898.0  | 1899.0 |
| gdb 1109 | 1896.0 <sup>a</sup> | 1900.6 | 1900.6  | 1902.3 | 1900.1 | 1900.1  | 1901.2 |
| gdb 1110 | 1897.4 <sup>a</sup> | 1908.4 | 1908.4  | 1909.7 | 1910.3 | 1910.2  | 1911.1 |
| gdb 1111 | 1901.8 <sup>a</sup> | 1909.1 | 1909.1  | 1909.3 | 1910.8 | 1910.8  | 1910.3 |
| gdb 1112 | 1873.9 <sup>a</sup> | 1873.2 | 1873.2  | 1875.0 | 1873.3 | 1873.3  | 1874.3 |
| gdb 1113 | 1873.7 <sup>a</sup> | 1875.5 | 1875.5  | 1876.8 | 1874.4 | 1874.4  | 1875.2 |
| gdb 1114 | 1876.7 <sup>a</sup> | 1880.7 | 1880.7  | 1879.4 | 1876.7 | 1876.7  | 1873.6 |
| gdb 1115 | 1907.5 <sup>a</sup> | 1916.2 | 1916.2  | 1916.4 | 1918.4 | 1918.4  | 1916.8 |
| gdb 1116 | 1876.1 <sup>a</sup> | 1878.0 | 1878.0  | 1875.8 | 1874.8 | 1874.8  | 1870.7 |
| gdb 1117 | 1874.5 <sup>a</sup> | 1876.6 | 1876.6  | 1874.0 | 1872.7 | 1872.7  | 1868.4 |
| gdb 1118 | 1897.8 <sup>a</sup> | 1905.2 | 1905.2  | 1905.7 | 1908.6 | 1908.6  | 1908.3 |
| gdb 1119 | 1878.6 <sup>a</sup> | 1876.4 | 1876.4  | 1875.0 | 1873.1 | 1873.1  | 1870.6 |
| gdb 1120 | 1880.9 <sup>a</sup> | 1878.6 | 1878.6  | 1881.0 | 1881.7 | 1881.7  | 1882.3 |
| gdb 1121 | 1874.1 <sup>a</sup> | 1866.7 | 1866.6  | 1868.5 | 1867.5 | 1867.4  | 1868.5 |
| gdb 1122 | 1873.8 <sup>a</sup> | 1874.3 | 1874.3  | 1876.0 | 1874.6 | 1874.5  | 1875.2 |
| gdb 1123 | 1877.2 <sup>a</sup> | 1880.7 | 1880.7  | 1879.0 | 1877.1 | 1877.0  | 1874.3 |
| gdb 1124 | 1880.2 <sup>a</sup> | 1878.0 | 1878.0  | 1880.1 | 1881.5 | 1881.5  | 1881.9 |
| gdb 1125 | 1878.8 <sup>a</sup> | 1876.3 | 1876.2  | 1875.1 | 1872.7 | 1872.7  | 1870.5 |
| gdb 1126 | 1871.2 <sup>a</sup> | 1864.9 | 1864.9  | 1866.4 | 1865.3 | 1865.3  | 1866.4 |
| gdb 1127 | 1887.4 <sup>a</sup> | 1888.1 | 1888.1  | 1889.4 | 1885.1 | 1885.1  | 1885.7 |
| gdb 1128 | 1885.0 <sup>a</sup> | 1884.8 | 1884.8  | 1887.6 | 1882.9 | 1882.9  | 1885.0 |
| gdb 1129 | 1890.0 <sup>a</sup> | 1898.5 | 1898.5  | 1900.1 | 1897.6 | 1897.6  | 1898.6 |
| gdb 1130 | 1898.6 <sup>a</sup> | 1899.7 | 1899.7  | 1897.7 | 1896.4 | 1896.4  | 1893.6 |
| gdb 1131 | 1873.1 <sup>a</sup> | 1876.4 | 1876.4  | 1879.1 | 1874.4 | 1874.3  | 1877.0 |
| gdb 1132 | 1875.2 <sup>a</sup> | 1877.6 | 1877.6  | 1880.3 | 1876.1 | 1876.1  | 1878.6 |
| gdb 1133 | 1875.7 <sup>a</sup> | 1879.7 | 1879.7  | 1882.4 | 1878.0 | 1878.0  | 1880.0 |
| gdb 1134 | 1922.3 <sup>a</sup> | 1935.0 | 1935.0  | 1935.3 | 1937.9 | 1937.9  | 1937.9 |
| gdb 1135 | 1900.1 <sup>a</sup> | 1909.4 | 1909.4  | 1910.6 | 1907.5 | 1907.5  | 1908.9 |
| gdb 1136 | 1877.9 <sup>a</sup> | 1881.9 | 1881.9  | 1880.7 | 1877.7 | 1877.7  | 1875.1 |
| gdb 1137 | 1872.2 <sup>a</sup> | 1871.4 | 1871.4  | 1873.1 | 1871.6 | 1871.6  | 1872.7 |
| gdb 1138 | 1872.9 <sup>a</sup> | 1877.2 | 1877.1  | 1878.1 | 1875.3 | 1875.2  | 1875.8 |
| gdb 1139 | 1898.5 <sup>a</sup> | 1908.6 | 1908.6  | 1909.8 | 1910.7 | 1910.7  | 1911.8 |
| gdb 1140 | 1897.7 <sup>a</sup> | 1899.5 | 1899.5  | 1897.4 | 1895.7 | 1895.7  | 1893.2 |
| gdb 1141 | 1888.5 <sup>a</sup> | 1895.4 | 1895.4  | 1896.9 | 1894.8 | 1894.8  | 1896.2 |
| gdb 1142 | 1892.5 <sup>a</sup> | 1901.9 | 1898.9  | 1900.4 | 1897.4 | 1897.3  | 1898.3 |
| gdb 1143 | 1903.0 <sup>a</sup> | 1912.8 | 1912.8  | 1914.5 | 1910.5 | 1910.4  | 1912.2 |
| gdb 1144 | 1901.1 <sup>a</sup> | 1907.8 | 1907.8  | 1908.9 | 1906.2 | 1906.1  | 1908.4 |
| gdb 1145 | 1922.8 <sup>a</sup> | 1935.6 | 1935.6  | 1935.9 | 1938.0 | 1938.0  | 1937.9 |
| gdb 1146 | 1899.5 <sup>a</sup> | 1905.8 | 1905.8  | 1907.8 | 1904.1 | 1904.0  | 1907.0 |
| gdb 1147 | 1901.2 <sup>a</sup> | 1908.1 | 1908.0  | 1909.2 | 1906.3 | 1906.2  | 1908.4 |
| gdb 1148 | 1901.9 <sup>a</sup> | 1912.7 | 1912.7  | 1912.7 | 1914.5 | 1914.5  | 1913.2 |
| gdb 1149 | 1879.8 <sup>a</sup> | 1889.8 | 1889.8  | 1892.0 | 1889.1 | 1889.1  | 1889.9 |
| gdb 1150 | 1890.1 <sup>a</sup> | 1893.6 | 1893.6  | 1895.6 | 1889.2 | 1889.1  | 1892.9 |
| gdb 1151 | 1898.5 <sup>a</sup> | 1906.1 | 1906.0  | 1906.1 | 1907.8 | 1907.7  | 1907.5 |
| gdb 1152 | 1860.2 <sup>a</sup> | 1850.1 | 1850.0  | 1851.3 | 1849.5 | 1849.4  | 1849.1 |
| gdb 1153 | 1882.8 <sup>a</sup> | 1859.9 | 1859.9  | 1864.2 | 1859.3 | 1859.3  | 1864.2 |
| gdb 1154 | 1870.8 <sup>a</sup> | 1863.3 | 1863.3  | 1865.0 | 1864.8 | 1864.8  | 1866.2 |
| gdb 1155 | 1868.6 <sup>a</sup> | 1861.1 | 1861.0  | 1862.7 | 1862.2 | 1862.1  | 1863.8 |
| gdb 1156 | 1876.4 <sup>a</sup> | 1874.2 | 1874.2  | 1873.1 | 1871.3 | 1871.3  | 1869.1 |
| gdb 1157 | 1888.5 <sup>a</sup> | 1879.1 | 1879.1  | 1880.9 | 1879.0 | 1879.0  | 1882.0 |
| gdb 1158 | 1897.2 <sup>a</sup> | 1907.0 | 1907.0  | 1908.5 | 1906.3 | 1905.9  | 1908.1 |
| gdb 1159 | 1856.2 <sup>a</sup> | 1846.7 | 1846.7  | 1847.9 | 1846.4 | 1846.3  | 1846.1 |
| gdb 1160 | 1874.0 <sup>a</sup> | 1854.5 | 1854.5  | 1857.8 | 1853.5 | 1853.4  | 1858.0 |
| gdb 1161 | 1866.2 <sup>a</sup> | 1859.9 | 1859.8  | 1861.8 | 1860.9 | 1860.9  | 1862.5 |
| gdb 1162 | 1885.6 <sup>a</sup> | 1877.5 | 1877.5  | 1879.1 | 1877.5 | 1877.4  | 1880.2 |
| gdb 1163 | 1902.6 <sup>a</sup> | 1911.5 | 1911.5  | 1913.0 | 1915.1 | 1915.0  | 1916.3 |
| gdb 1164 | 1897.5 <sup>a</sup> | 1905.2 | 1905.2  | 1905.5 | 1908.1 | 1908.1  | 1907.8 |
| gdb 1165 | 1872.3 <sup>a</sup> | 1871.9 | 1871.8  | 1870.9 | 1868.9 | 1868.9  | 1866.8 |
| gdb 1166 | 1870.2 <sup>a</sup> | 1864.4 | 1864.4  | 1866.6 | 1865.4 | 1865.4  | 1866.9 |
| gdb 1167 | 1889.8 <sup>a</sup> | 1883.8 | 1883.8  | 1885.2 | 1882.3 | 1882.2  | 1884.8 |

... continued on next page ...

Table S73: ... continued from previous page ...

| Species  | Ref.                | OM2    | OM2-D3T | ODM2   | OM3    | OM3-D3T | ODM3   |
|----------|---------------------|--------|---------|--------|--------|---------|--------|
| gdb 1168 | 1919.0 <sup>a</sup> | 1918.6 | 1918.6  | 1919.4 | 1917.0 | 1916.9  | 1919.8 |
| gdb 1169 | 1902.9 <sup>a</sup> | 1911.8 | 1911.8  | 1911.8 | 1913.2 | 1915.0  | 1915.8 |
| gdb 1170 | 1898.9 <sup>a</sup> | 1908.3 | 1908.2  | 1910.3 | 1907.0 | 1907.0  | 1909.4 |
| gdb 1171 | 1911.0 <sup>a</sup> | 1911.5 | 1911.5  | 1911.7 | 1908.9 | 1908.9  | 1911.8 |
| gdb 1172 | 1865.6 <sup>a</sup> | 1870.5 | 1870.5  | 1870.4 | 1869.5 | 1869.5  | 1871.2 |
| gdb 1173 | 1867.4 <sup>a</sup> | 1872.9 | 1872.9  | 1872.9 | 1871.2 | 1871.2  | 1873.0 |
| gdb 1174 | 1888.4 <sup>a</sup> | 1884.5 | 1884.2  | 1885.9 | 1882.7 | 1882.7  | 1885.8 |
| gdb 1175 | 1878.1 <sup>a</sup> | 1880.9 | 1880.9  | 1883.4 | 1880.0 | 1880.0  | 1881.6 |
| gdb 1176 | 1873.2 <sup>a</sup> | 1880.7 | 1880.6  | 1883.9 | 1878.8 | 1878.8  | 1881.0 |
| gdb 1177 | 1878.6 <sup>a</sup> | 1884.3 | 1884.3  | 1886.1 | 1883.9 | 1883.9  | 1884.7 |
| gdb 1178 | 1876.7 <sup>a</sup> | 1885.2 | 1885.2  | 1888.3 | 1884.7 | 1884.6  | 1886.1 |
| gdb 1179 | 1850.3 <sup>a</sup> | 1849.0 | 1849.0  | 1848.3 | 1843.0 | 1843.0  | 1840.9 |
| gdb 1180 | 1848.4 <sup>a</sup> | 1848.5 | 1848.5  | 1849.2 | 1843.0 | 1843.0  | 1841.6 |
| gdb 1181 | 1855.5 <sup>a</sup> | 1859.8 | 1859.8  | 1862.6 | 1858.8 | 1858.7  | 1858.5 |
| gdb 1182 | 1857.0 <sup>a</sup> | 1852.8 | 1852.8  | 1856.9 | 1854.8 | 1854.8  | 1855.7 |
| gdb 1183 | 1855.6 <sup>a</sup> | 1855.9 | 1855.9  | 1859.5 | 1856.1 | 1856.1  | 1857.1 |
| gdb 1184 | 1857.5 <sup>a</sup> | 1857.9 | 1857.9  | 1861.2 | 1858.5 | 1858.5  | 1858.7 |
| gdb 1185 | 1855.0 <sup>a</sup> | 1853.3 | 1853.3  | 1853.8 | 1847.2 | 1847.2  | 1845.4 |
| gdb 1186 | 1853.7 <sup>a</sup> | 1851.8 | 1851.8  | 1855.4 | 1848.3 | 1848.3  | 1851.2 |
| gdb 1187 | 1854.9 <sup>a</sup> | 1854.0 | 1854.0  | 1858.3 | 1849.6 | 1849.6  | 1852.2 |
| gdb 1188 | 1851.2 <sup>a</sup> | 1850.6 | 1850.6  | 1854.7 | 1846.2 | 1846.1  | 1849.4 |
| gdb 1189 | 1860.9 <sup>a</sup> | 1867.0 | 1867.0  | 1871.4 | 1865.3 | 1865.3  | 1866.5 |
| gdb 1190 | 1853.5 <sup>a</sup> | 1851.5 | 1851.5  | 1854.5 | 1853.4 | 1853.4  | 1854.3 |
| gdb 1191 | 1853.3 <sup>a</sup> | 1854.7 | 1854.7  | 1858.3 | 1855.4 | 1855.3  | 1856.2 |
| gdb 1192 | 1854.3 <sup>a</sup> | 1853.1 | 1853.1  | 1857.3 | 1849.6 | 1849.5  | 1852.0 |
| gdb 1193 | 1857.9 <sup>a</sup> | 1862.8 | 1862.8  | 1866.1 | 1861.6 | 1861.5  | 1863.0 |
| gdb 1194 | 1854.7 <sup>a</sup> | 1853.8 | 1853.8  | 1854.2 | 1847.9 | 1847.9  | 1846.0 |
| gdb 1195 | 1855.5 <sup>a</sup> | 1857.2 | 1857.2  | 1860.8 | 1857.8 | 1857.8  | 1858.4 |
| gdb 1196 | 1852.7 <sup>a</sup> | 1850.2 | 1850.2  | 1855.1 | 1847.2 | 1847.2  | 1850.5 |
| gdb 1197 | 1851.4 <sup>a</sup> | 1850.8 | 1850.8  | 1855.0 | 1847.2 | 1847.2  | 1849.8 |
| gdb 1198 | 1852.7 <sup>a</sup> | 1851.4 | 1851.4  | 1855.6 | 1848.2 | 1848.2  | 1851.3 |
| gdb 1199 | 1858.8 <sup>a</sup> | 1862.9 | 1862.8  | 1867.4 | 1862.0 | 1862.0  | 1863.6 |
| gdb 1200 | 1866.1 <sup>a</sup> | 1872.0 | 1871.9  | 1874.8 | 1862.6 | 1862.6  | 1867.2 |
| gdb 1201 | 1866.3 <sup>a</sup> | 1873.3 | 1873.3  | 1875.5 | 1864.0 | 1864.0  | 1868.1 |
| gdb 1202 | 1867.3 <sup>a</sup> | 1873.7 | 1873.7  | 1877.6 | 1870.4 | 1870.3  | 1872.5 |
| gdb 1203 | 1865.7 <sup>a</sup> | 1872.0 | 1872.0  | 1876.0 | 1868.5 | 1868.8  | 1871.2 |
| gdb 1204 | 1855.6 <sup>a</sup> | 1856.1 | 1856.1  | 1855.6 | 1848.8 | 1848.7  | 1846.2 |
| gdb 1205 | 1859.6 <sup>a</sup> | 1863.6 | 1863.6  | 1866.5 | 1862.1 | 1862.0  | 1861.9 |
| gdb 1206 | 1856.2 <sup>a</sup> | 1854.4 | 1854.4  | 1857.9 | 1850.0 | 1850.0  | 1852.2 |
| gdb 1207 | 1851.9 <sup>a</sup> | 1852.7 | 1852.7  | 1855.8 | 1847.9 | 1847.9  | 1850.5 |
| gdb 1208 | 1853.4 <sup>a</sup> | 1856.2 | 1856.2  | 1854.7 | 1850.3 | 1850.3  | 1846.7 |
| gdb 1209 | 1875.6 <sup>a</sup> | 1883.9 | 1883.9  | 1885.5 | 1885.3 | 1885.3  | 1885.7 |
| gdb 1210 | 1881.9 <sup>a</sup> | 1889.9 | 1889.8  | 1892.1 | 1888.6 | 1888.5  | 1889.4 |
| gdb 1211 | 1876.4 <sup>a</sup> | 1883.0 | 1883.0  | 1885.7 | 1882.2 | 1882.2  | 1884.3 |
| gdb 1212 | 1858.9 <sup>a</sup> | 1857.2 | 1857.2  | 1856.9 | 1849.8 | 1849.8  | 1847.3 |
| gdb 1213 | 1858.2 <sup>a</sup> | 1855.3 | 1855.3  | 1855.0 | 1849.2 | 1849.2  | 1846.7 |
| gdb 1214 | 1879.1 <sup>a</sup> | 1884.7 | 1884.7  | 1886.4 | 1885.7 | 1885.7  | 1886.3 |
| gdb 1215 | 1887.6 <sup>a</sup> | 1887.6 | 1887.6  | 1889.4 | 1883.3 | 1883.3  | 1886.4 |
| gdb 1216 | 1878.1 <sup>a</sup> | 1885.3 | 1885.3  | 1887.9 | 1884.9 | 1884.9  | 1886.1 |
| gdb 1217 | 1856.6 <sup>a</sup> | 1854.2 | 1854.2  | 1853.9 | 1848.4 | 1848.3  | 1846.1 |
| gdb 1218 | 1854.1 <sup>a</sup> | 1855.5 | 1855.5  | 1854.9 | 1848.4 | 1848.4  | 1846.0 |
| gdb 1219 | 1888.5 <sup>a</sup> | 1885.3 | 1885.3  | 1887.4 | 1881.2 | 1881.1  | 1885.5 |
| gdb 1220 | 1876.3 <sup>a</sup> | 1880.8 | 1880.8  | 1883.4 | 1881.5 | 1881.5  | 1883.5 |
| gdb 1221 | 1862.7 <sup>a</sup> | 1871.9 | 1871.9  | 1873.9 | 1868.1 | 1868.0  | 1871.3 |
| gdb 1222 | 1874.7 <sup>a</sup> | 1879.4 | 1879.4  | 1881.7 | 1879.8 | 1879.8  | 1881.1 |
| gdb 1223 | 1885.1 <sup>a</sup> | 1880.7 | 1880.6  | 1882.7 | 1876.1 | 1876.0  | 1880.3 |
| gdb 1224 | 1864.8 <sup>a</sup> | 1874.1 | 1874.1  | 1875.1 | 1870.2 | 1870.2  | 1872.9 |
| gdb 1225 | 1874.6 <sup>a</sup> | 1881.9 | 1881.9  | 1883.9 | 1882.0 | 1882.0  | 1883.4 |
| gdb 1226 | 1871.8 <sup>a</sup> | 1880.0 | 1880.0  | 1882.3 | 1881.1 | 1881.1  | 1881.6 |
| gdb 1227 | 1874.1 <sup>a</sup> | 1882.6 | 1882.6  | 1883.3 | 1883.3 | 1883.3  | 1883.2 |
| gdb 1228 | 1853.8 <sup>a</sup> | 1854.2 | 1854.2  | 1853.8 | 1849.5 | 1849.5  | 1846.3 |
| gdb 1229 | 1856.2 <sup>a</sup> | 1858.9 | 1858.9  | 1861.8 | 1860.3 | 1860.2  | 1859.5 |
| gdb 1230 | 1855.8 <sup>a</sup> | 1857.6 | 1857.5  | 1860.5 | 1859.5 | 1859.5  | 1858.9 |
| gdb 1231 | 1853.6 <sup>a</sup> | 1853.7 | 1853.7  | 1853.4 | 1849.6 | 1849.6  | 1846.5 |
| gdb 1232 | 1850.0 <sup>a</sup> | 1853.3 | 1853.3  | 1856.5 | 1850.8 | 1850.7  | 1852.1 |

... continued on next page ...

Table S73: ... continued from previous page ...

| Species  | Ref.                | OM2    | OM2-D3T | ODM2   | OM3    | OM3-D3T | ODM3   |
|----------|---------------------|--------|---------|--------|--------|---------|--------|
| gdb 1233 | 1850.2 <sup>a</sup> | 1852.0 | 1852.0  | 1855.4 | 1849.7 | 1849.7  | 1851.3 |
| gdb 1234 | 1879.4 <sup>a</sup> | 1889.1 | 1888.7  | 1890.9 | 1890.5 | 1890.5  | 1890.6 |
| gdb 1235 | 1850.6 <sup>a</sup> | 1852.2 | 1852.2  | 1851.7 | 1848.5 | 1848.5  | 1845.3 |
| gdb 1236 | 1883.4 <sup>a</sup> | 1879.8 | 1880.5  | 1881.5 | 1877.7 | 1877.7  | 1880.1 |
| gdb 1237 | 1872.4 <sup>a</sup> | 1880.2 | 1880.2  | 1882.3 | 1882.9 | 1882.9  | 1883.5 |
| gdb 1238 | 1874.2 <sup>a</sup> | 1883.8 | 1883.7  | 1885.5 | 1882.3 | 1882.2  | 1882.6 |
| gdb 1239 | 1878.8 <sup>a</sup> | 1885.4 | 1885.4  | 1886.8 | 1884.3 | 1884.3  | 1884.6 |
| gdb 1240 | 1885.8 <sup>a</sup> | 1885.7 | 1885.6  | 1886.9 | 1882.0 | 1881.9  | 1884.5 |
| gdb 1241 | 1878.0 <sup>a</sup> | 1883.6 | 1883.6  | 1885.2 | 1884.7 | 1884.7  | 1885.1 |
| gdb 1242 | 1878.4 <sup>a</sup> | 1884.4 | 1884.4  | 1886.4 | 1884.7 | 1884.7  | 1885.9 |
| gdb 1243 | 1851.3 <sup>a</sup> | 1850.1 | 1850.1  | 1849.8 | 1844.5 | 1844.5  | 1842.8 |
| gdb 1244 | 1875.4 <sup>a</sup> | 1881.3 | 1881.2  | 1883.3 | 1879.1 | 1879.1  | 1880.2 |
| gdb 1245 | 1874.8 <sup>a</sup> | 1882.7 | 1882.7  | 1886.1 | 1879.4 | 1879.4  | 1881.8 |
| gdb 1246 | 1871.4 <sup>a</sup> | 1879.9 | 1879.9  | 1882.4 | 1880.5 | 1880.5  | 1881.3 |
| gdb 1247 | 1874.3 <sup>a</sup> | 1880.8 | 1880.8  | 1883.5 | 1882.2 | 1882.2  | 1883.1 |
| gdb 1248 | 1873.9 <sup>a</sup> | 1881.5 | 1881.5  | 1883.4 | 1879.7 | 1879.7  | 1880.4 |
| gdb 1249 | 1876.2 <sup>a</sup> | 1883.5 | 1883.5  | 1885.7 | 1882.9 | 1882.9  | 1883.7 |
| gdb 1250 | 1872.8 <sup>a</sup> | 1877.6 | 1877.6  | 1881.1 | 1878.9 | 1878.8  | 1881.4 |
| gdb 1251 | 1883.4 <sup>a</sup> | 1881.0 | 1881.0  | 1882.6 | 1876.6 | 1876.6  | 1880.4 |
| gdb 1252 | 1874.1 <sup>a</sup> | 1878.4 | 1878.4  | 1880.5 | 1879.7 | 1879.7  | 1881.8 |
| gdb 1253 | 1858.0 <sup>a</sup> | 1852.6 | 1852.5  | 1851.9 | 1847.0 | 1847.0  | 1844.7 |
| gdb 1254 | 1861.4 <sup>a</sup> | 1857.4 | 1857.4  | 1861.2 | 1858.0 | 1858.0  | 1858.6 |
| gdb 1255 | 1856.3 <sup>a</sup> | 1852.2 | 1852.1  | 1851.4 | 1846.7 | 1846.7  | 1844.2 |
| gdb 1256 | 1858.4 <sup>a</sup> | 1855.8 | 1855.8  | 1859.4 | 1856.3 | 1856.3  | 1857.2 |
| gdb 1257 | 1856.9 <sup>a</sup> | 1852.1 | 1852.1  | 1852.8 | 1846.3 | 1846.2  | 1844.7 |
| gdb 1258 | 1856.1 <sup>a</sup> | 1855.0 | 1855.0  | 1859.3 | 1850.4 | 1850.4  | 1852.9 |
| gdb 1259 | 1854.1 <sup>a</sup> | 1851.8 | 1851.8  | 1856.0 | 1847.6 | 1847.6  | 1850.9 |
| gdb 1260 | 1846.8 <sup>a</sup> | 1831.0 | 1831.0  | 1833.2 | 1831.1 | 1831.0  | 1832.3 |
| gdb 1261 | 1858.2 <sup>a</sup> | 1847.0 | 1846.9  | 1847.7 | 1845.4 | 1845.4  | 1844.1 |
| gdb 1262 | 1871.5 <sup>a</sup> | 1854.3 | 1854.3  | 1858.9 | 1858.4 | 1858.3  | 1860.3 |
| gdb 1263 | 1864.2 <sup>a</sup> | 1863.3 | 1863.3  | 1865.7 | 1859.4 | 1859.3  | 1860.2 |
| gdb 1264 | 1876.1 <sup>a</sup> | 1871.0 | 1871.0  | 1870.0 | 1868.0 | 1868.0  | 1865.7 |
| gdb 1265 | 1891.8 <sup>a</sup> | 1869.5 | 1869.4  | 1871.2 | 1870.1 | 1870.0  | 1872.1 |
| gdb 1266 | 1884.4 <sup>a</sup> | 1878.9 | 1878.9  | 1880.8 | 1881.7 | 1881.7  | 1882.3 |
| gdb 1267 | 1829.6 <sup>a</sup> | 1820.3 | 1820.3  | 1816.0 | 1810.8 | 1810.8  | 1805.0 |
| gdb 1268 | 1838.2 <sup>a</sup> | 1830.5 | 1830.5  | 1829.3 | 1826.9 | 1826.9  | 1823.9 |
| gdb 1269 | 1839.4 <sup>a</sup> | 1833.3 | 1833.3  | 1833.1 | 1829.2 | 1829.2  | 1825.8 |
| gdb 1270 | 1883.7 <sup>a</sup> | 1881.0 | 1881.0  | 1880.8 | 1875.8 | 1875.8  | 1873.9 |
| gdb 1271 | 1889.3 <sup>a</sup> | 1867.9 | 1867.9  | 1869.3 | 1868.2 | 1868.2  | 1870.2 |
| gdb 1272 | 1876.5 <sup>a</sup> | 1871.9 | 1871.9  | 1870.8 | 1868.6 | 1868.5  | 1866.1 |
| gdb 1273 | 1885.3 <sup>a</sup> | 1881.1 | 1881.1  | 1884.0 | 1883.7 | 1883.6  | 1884.3 |
| gdb 1274 | 1883.6 <sup>a</sup> | 1881.2 | 1881.1  | 1880.9 | 1875.9 | 1875.9  | 1874.0 |
| gdb 1275 | 1850.5 <sup>a</sup> | 1834.7 | 1834.7  | 1838.3 | 1834.6 | 1834.5  | 1835.8 |
| gdb 1276 | 1822.3 <sup>a</sup> | 1802.7 | 1802.7  | 1805.5 | 1798.2 | 1798.2  | 1798.1 |
| gdb 1277 | 1833.4 <sup>a</sup> | 1810.1 | 1810.1  | 1813.4 | 1810.4 | 1810.4  | 1811.5 |
| gdb 1278 | 1835.3 <sup>a</sup> | 1812.0 | 1812.0  | 1816.8 | 1812.4 | 1812.4  | 1813.7 |
| gdb 1279 | 1845.9 <sup>a</sup> | 1830.6 | 1830.6  | 1834.4 | 1830.9 | 1830.8  | 1832.7 |
| gdb 1280 | 1849.0 <sup>a</sup> | 1833.4 | 1833.4  | 1837.1 | 1833.7 | 1833.7  | 1835.1 |
| gdb 1281 | 1913.4 <sup>a</sup> | 1918.6 | 1918.6  | 1919.6 | 1920.3 | 1920.3  | 1920.6 |
| gdb 1282 | 1860.5 <sup>a</sup> | 1861.5 | 1861.5  | 1863.7 | 1858.1 | 1858.1  | 1858.9 |
| gdb 1283 | 1882.9 <sup>a</sup> | 1881.1 | 1881.1  | 1879.3 | 1876.2 | 1876.2  | 1873.9 |
| gdb 1284 | 1910.2 <sup>a</sup> | 1918.2 | 1918.2  | 1919.0 | 1919.9 | 1919.9  | 1920.6 |
| gdb 1285 | 1882.9 <sup>a</sup> | 1881.8 | 1881.8  | 1880.1 | 1877.0 | 1876.9  | 1874.5 |
| gdb 1286 | 1922.7 <sup>a</sup> | 1916.6 | 1916.6  | 1917.7 | 1914.0 | 1914.0  | 1916.4 |
| gdb 1287 | 1914.3 <sup>a</sup> | 1918.6 | 1918.6  | 1919.2 | 1919.8 | 1919.8  | 1919.8 |
| gdb 1288 | 1854.4 <sup>a</sup> | 1852.7 | 1852.7  | 1856.4 | 1854.6 | 1854.5  | 1855.3 |
| gdb 1289 | 1845.0 <sup>a</sup> | 1830.3 | 1830.3  | 1834.7 | 1830.5 | 1830.5  | 1832.9 |
| gdb 1290 | 1829.9 <sup>a</sup> | 1806.8 | 1806.8  | 1812.2 | 1807.8 | 1807.7  | 1810.1 |
| gdb 1291 | 1836.7 <sup>a</sup> | 1829.6 | 1829.6  | 1828.7 | 1826.2 | 1826.2  | 1823.5 |
| gdb 1292 | 1887.7 <sup>a</sup> | 1865.3 | 1865.3  | 1867.4 | 1866.0 | 1866.0  | 1868.6 |
| gdb 1293 | 1882.9 <sup>a</sup> | 1877.9 | 1877.9  | 1880.1 | 1881.0 | 1881.0  | 1881.8 |
| gdb 1294 | 1853.0 <sup>a</sup> | 1841.0 | 1841.0  | 1842.2 | 1840.1 | 1840.0  | 1839.5 |
| gdb 1295 | 1870.0 <sup>a</sup> | 1851.7 | 1851.7  | 1855.6 | 1855.8 | 1855.8  | 1858.0 |
| gdb 1296 | 1860.0 <sup>a</sup> | 1859.2 | 1859.2  | 1860.9 | 1855.6 | 1855.5  | 1856.8 |
| gdb 1297 | 1871.6 <sup>a</sup> | 1868.5 | 1868.5  | 1867.7 | 1865.0 | 1865.0  | 1863.0 |

... continued on next page ...



Table S73: ... continued from previous page ...

| Species  | Ref.                | OM2    | OM2-D3T | ODM2   | OM3    | OM3-D3T | ODM3   |
|----------|---------------------|--------|---------|--------|--------|---------|--------|
| gdb 1298 | 1884.8 <sup>a</sup> | 1880.0 | 1880.0  | 1882.0 | 1881.9 | 1881.9  | 1882.3 |
| gdb 1299 | 1880.1 <sup>a</sup> | 1878.5 | 1878.5  | 1878.7 | 1873.6 | 1873.6  | 1872.4 |
| gdb 1300 | 1910.1 <sup>a</sup> | 1917.6 | 1917.6  | 1920.5 | 1918.7 | 1918.7  | 1920.5 |
| gdb 1301 | 1922.3 <sup>a</sup> | 1916.1 | 1916.1  | 1917.8 | 1913.4 | 1913.3  | 1916.6 |
| gdb 1302 | 1911.6 <sup>a</sup> | 1915.6 | 1915.6  | 1918.3 | 1917.0 | 1917.0  | 1918.5 |
| gdb 1303 | 1854.4 <sup>a</sup> | 1852.2 | 1852.2  | 1856.9 | 1849.1 | 1849.1  | 1851.8 |
| gdb 1304 | 1856.6 <sup>a</sup> | 1854.9 | 1854.9  | 1858.8 | 1856.1 | 1856.1  | 1857.0 |
| gdb 1305 | 1854.6 <sup>a</sup> | 1851.8 | 1851.8  | 1852.9 | 1846.7 | 1846.6  | 1845.1 |
| gdb 1306 | 1853.7 <sup>a</sup> | 1850.5 | 1850.5  | 1848.8 | 1845.3 | 1845.2  | 1842.8 |
| gdb 1307 | 1914.1 <sup>a</sup> | 1916.0 | 1916.0  | 1917.4 | 1916.8 | 1916.8  | 1917.6 |
| gdb 1308 | 1852.0 <sup>a</sup> | 1849.9 | 1849.9  | 1853.1 | 1846.9 | 1846.8  | 1849.6 |
| gdb 1309 | 1854.7 <sup>a</sup> | 1851.6 | 1851.6  | 1856.1 | 1848.6 | 1848.6  | 1851.5 |
| gdb 1310 | 1881.5 <sup>a</sup> | 1888.0 | 1887.9  | 1889.0 | 1889.4 | 1889.3  | 1888.8 |
| gdb 1311 | 1851.5 <sup>a</sup> | 1849.9 | 1849.8  | 1849.9 | 1846.5 | 1846.5  | 1843.8 |
| gdb 1312 | 1876.6 <sup>a</sup> | 1880.7 | 1880.7  | 1881.9 | 1883.7 | 1883.7  | 1884.2 |
| gdb 1313 | 1889.7 <sup>a</sup> | 1887.3 | 1887.3  | 1888.5 | 1885.0 | 1884.9  | 1887.9 |
| gdb 1314 | 1878.0 <sup>a</sup> | 1881.9 | 1881.9  | 1883.8 | 1882.7 | 1882.7  | 1884.0 |
| gdb 1315 | 1861.6 <sup>a</sup> | 1870.4 | 1870.4  | 1871.4 | 1867.2 | 1867.2  | 1870.1 |
| gdb 1316 | 1873.5 <sup>a</sup> | 1877.4 | 1877.4  | 1879.4 | 1878.6 | 1878.5  | 1880.1 |
| gdb 1317 | 1854.1 <sup>a</sup> | 1850.0 | 1850.0  | 1849.3 | 1844.6 | 1844.6  | 1842.4 |
| gdb 1318 | 1853.3 <sup>a</sup> | 1849.0 | 1849.0  | 1848.5 | 1844.5 | 1844.5  | 1842.4 |
| gdb 1319 | 1861.7 <sup>a</sup> | 1868.5 | 1868.5  | 1870.6 | 1867.6 | 1867.6  | 1869.2 |
| gdb 1320 | 1873.8 <sup>a</sup> | 1878.5 | 1878.5  | 1879.7 | 1881.2 | 1881.2  | 1881.5 |
| gdb 1321 | 1883.1 <sup>a</sup> | 1878.2 | 1878.2  | 1880.3 | 1875.1 | 1875.1  | 1878.0 |
| gdb 1322 | 1864.5 <sup>a</sup> | 1871.3 | 1871.3  | 1873.3 | 1868.9 | 1868.8  | 1871.7 |
| gdb 1323 | 1874.6 <sup>a</sup> | 1881.0 | 1881.0  | 1884.1 | 1882.6 | 1882.0  | 1883.0 |
| gdb 1324 | 1889.9 <sup>a</sup> | 1897.7 | 1897.7  | 1897.7 | 1899.3 | 1899.3  | 1899.0 |
| gdb 1325 | 1887.3 <sup>a</sup> | 1897.8 | 1897.8  | 1898.2 | 1897.8 | 1897.8  | 1898.4 |
| gdb 1326 | 1896.1 <sup>a</sup> | 1905.7 | 1905.7  | 1906.0 | 1906.9 | 1906.9  | 1906.4 |
| gdb 1327 | 1876.1 <sup>a</sup> | 1879.7 | 1879.6  | 1882.8 | 1878.6 | 1878.6  | 1880.6 |
| gdb 1328 | 1875.0 <sup>a</sup> | 1884.6 | 1884.6  | 1886.9 | 1882.6 | 1882.6  | 1884.3 |
| gdb 1329 | 1893.3 <sup>a</sup> | 1899.1 | 1899.1  | 1899.5 | 1900.3 | 1900.3  | 1901.2 |
| gdb 1330 | 1854.0 <sup>a</sup> | 1843.5 | 1843.5  | 1844.8 | 1842.1 | 1842.1  | 1842.4 |
| gdb 1331 | 1861.8 <sup>a</sup> | 1849.2 | 1849.2  | 1854.1 | 1852.0 | 1852.0  | 1854.6 |
| gdb 1332 | 1865.3 <sup>a</sup> | 1857.0 | 1857.0  | 1859.0 | 1857.7 | 1857.7  | 1859.9 |
| gdb 1333 | 1861.5 <sup>a</sup> | 1854.6 | 1854.6  | 1856.5 | 1855.3 | 1855.3  | 1857.7 |
| gdb 1334 | 1870.2 <sup>a</sup> | 1867.5 | 1867.5  | 1866.5 | 1863.8 | 1863.8  | 1862.3 |
| gdb 1335 | 1872.2 <sup>a</sup> | 1872.4 | 1872.4  | 1874.0 | 1873.9 | 1873.8  | 1874.6 |
| gdb 1336 | 1891.4 <sup>a</sup> | 1900.2 | 1900.2  | 1901.9 | 1898.6 | 1898.6  | 1901.4 |
| gdb 1337 | 1900.6 <sup>a</sup> | 1907.8 | 1907.8  | 1908.7 | 1909.2 | 1909.1  | 1909.7 |
| gdb 1338 | 1850.4 <sup>a</sup> | 1840.1 | 1840.1  | 1841.8 | 1839.3 | 1839.3  | 1840.1 |
| gdb 1339 | 1858.7 <sup>a</sup> | 1846.6 | 1846.6  | 1850.7 | 1849.9 | 1849.9  | 1852.6 |
| gdb 1340 | 1861.4 <sup>a</sup> | 1853.6 | 1853.6  | 1856.0 | 1854.5 | 1854.5  | 1857.1 |
| gdb 1341 | 1870.6 <sup>a</sup> | 1871.4 | 1871.4  | 1873.6 | 1873.4 | 1873.4  | 1874.6 |
| gdb 1342 | 1897.9 <sup>a</sup> | 1905.1 | 1905.1  | 1907.2 | 1908.2 | 1908.2  | 1910.5 |
| gdb 1343 | 1891.9 <sup>a</sup> | 1897.7 | 1897.7  | 1898.2 | 1900.6 | 1900.6  | 1901.5 |
| gdb 1344 | 1867.2 <sup>a</sup> | 1865.5 | 1865.5  | 1864.9 | 1862.0 | 1861.9  | 1861.0 |
| gdb 1345 | 1864.8 <sup>a</sup> | 1857.5 | 1857.5  | 1859.7 | 1857.9 | 1857.9  | 1860.1 |
| gdb 1346 | 1871.2 <sup>a</sup> | 1872.4 | 1872.4  | 1874.6 | 1874.0 | 1873.9  | 1875.1 |
| gdb 1347 | 1899.3 <sup>a</sup> | 1904.8 | 1904.7  | 1906.3 | 1906.0 | 1906.0  | 1907.6 |
| gdb 1348 | 1897.8 <sup>a</sup> | 1904.8 | 1904.8  | 1906.3 | 1907.5 | 1907.5  | 1909.4 |
| gdb 1349 | 1893.7 <sup>a</sup> | 1901.7 | 1901.6  | 1904.0 | 1899.9 | 1899.8  | 1903.3 |
| gdb 1350 | 1899.0 <sup>a</sup> | 1904.7 | 1904.7  | 1906.3 | 1905.8 | 1905.8  | 1907.3 |
| gdb 1351 | 1875.3 <sup>a</sup> | 1878.7 | 1878.7  | 1880.8 | 1879.0 | 1879.0  | 1880.7 |
| gdb 1352 | 1873.3 <sup>a</sup> | 1876.6 | 1876.5  | 1878.7 | 1876.9 | 1876.9  | 1878.7 |
| gdb 1353 | 1855.4 <sup>a</sup> | 1851.4 | 1851.4  | 1850.4 | 1845.8 | 1845.8  | 1843.6 |
| gdb 1354 | 1858.5 <sup>a</sup> | 1857.6 | 1857.6  | 1861.6 | 1858.7 | 1858.6  | 1859.4 |
| gdb 1355 | 1856.1 <sup>a</sup> | 1852.0 | 1852.0  | 1851.5 | 1847.2 | 1847.2  | 1845.0 |
| gdb 1356 | 1852.4 <sup>a</sup> | 1853.1 | 1853.0  | 1856.3 | 1855.2 | 1855.1  | 1856.3 |
| gdb 1357 | 1850.0 <sup>a</sup> | 1847.7 | 1847.6  | 1850.1 | 1844.4 | 1844.4  | 1847.1 |
| gdb 1358 | 1849.6 <sup>a</sup> | 1845.3 | 1845.3  | 1848.3 | 1843.0 | 1843.0  | 1845.8 |
| gdb 1359 | 1879.7 <sup>a</sup> | 1883.8 | 1883.8  | 1887.0 | 1885.6 | 1885.6  | 1887.0 |
| gdb 1360 | 1885.4 <sup>a</sup> | 1883.5 | 1883.5  | 1884.1 | 1880.3 | 1880.3  | 1883.4 |
| gdb 1361 | 1853.3 <sup>a</sup> | 1850.2 | 1850.2  | 1849.6 | 1845.6 | 1845.5  | 1843.4 |
| gdb 1362 | 1871.6 <sup>a</sup> | 1878.1 | 1878.1  | 1880.1 | 1878.4 | 1878.4  | 1880.1 |

... continued on next page ...

Table S73: ... continued from previous page ...

| Species  | Ref.                | OM2    | OM2-D3T | ODM2   | OM3    | OM3-D3T | ODM3   |
|----------|---------------------|--------|---------|--------|--------|---------|--------|
| gdb 1363 | 1872.8 <sup>a</sup> | 1876.9 | 1876.8  | 1878.7 | 1877.5 | 1877.4  | 1879.1 |
| gdb 1364 | 1865.0 <sup>a</sup> | 1872.2 | 1872.2  | 1873.2 | 1869.1 | 1869.1  | 1871.6 |
| gdb 1365 | 1851.0 <sup>a</sup> | 1848.6 | 1848.6  | 1847.7 | 1843.4 | 1843.3  | 1841.3 |
| gdb 1366 | 1854.5 <sup>a</sup> | 1856.3 | 1856.3  | 1860.1 | 1857.1 | 1857.1  | 1857.7 |
| gdb 1367 | 1844.4 <sup>a</sup> | 1845.2 | 1845.2  | 1847.1 | 1844.0 | 1843.9  | 1845.7 |
| gdb 1368 | 1852.0 <sup>a</sup> | 1851.0 | 1851.0  | 1851.4 | 1846.4 | 1846.4  | 1844.6 |
| gdb 1369 | 1851.9 <sup>a</sup> | 1851.9 | 1851.9  | 1854.5 | 1853.6 | 1853.6  | 1854.2 |
| gdb 1370 | 1841.1 <sup>a</sup> | 1841.5 | 1841.5  | 1843.7 | 1835.0 | 1835.0  | 1838.9 |
| gdb 1371 | 1850.8 <sup>a</sup> | 1850.0 | 1850.0  | 1852.8 | 1847.0 | 1847.0  | 1849.2 |
| gdb 1372 | 1847.3 <sup>a</sup> | 1846.7 | 1846.7  | 1849.4 | 1844.0 | 1844.0  | 1846.5 |
| gdb 1373 | 1873.8 <sup>a</sup> | 1877.7 | 1877.7  | 1881.2 | 1879.1 | 1879.1  | 1881.5 |
| gdb 1374 | 1872.6 <sup>a</sup> | 1877.0 | 1877.0  | 1880.3 | 1877.4 | 1877.4  | 1879.4 |
| gdb 1375 | 1886.9 <sup>a</sup> | 1881.7 | 1881.7  | 1883.2 | 1877.9 | 1877.9  | 1881.8 |
| gdb 1376 | 1881.1 <sup>a</sup> | 1883.5 | 1883.5  | 1886.0 | 1884.8 | 1884.7  | 1885.3 |
| gdb 1377 | 1866.3 <sup>a</sup> | 1874.1 | 1874.1  | 1874.7 | 1871.6 | 1871.6  | 1873.5 |
| gdb 1378 | 1839.1 <sup>a</sup> | 1838.1 | 1838.1  | 1836.1 | 1830.0 | 1830.0  | 1829.0 |
| gdb 1379 | 1851.7 <sup>a</sup> | 1848.7 | 1848.7  | 1847.6 | 1844.1 | 1844.1  | 1841.5 |
| gdb 1380 | 1860.9 <sup>a</sup> | 1866.3 | 1868.2  | 1870.5 | 1865.0 | 1864.9  | 1868.0 |
| gdb 1381 | 1885.3 <sup>a</sup> | 1880.1 | 1879.8  | 1881.1 | 1877.3 | 1877.3  | 1880.9 |
| gdb 1382 | 1872.4 <sup>a</sup> | 1874.8 | 1874.8  | 1878.0 | 1877.3 | 1877.3  | 1879.3 |
| gdb 1383 | 1877.3 <sup>a</sup> | 1884.0 | 1884.0  | 1886.6 | 1885.2 | 1885.2  | 1886.0 |
| gdb 1384 | 1889.6 <sup>a</sup> | 1886.4 | 1886.2  | 1888.1 | 1883.9 | 1883.6  | 1887.1 |
| gdb 1385 | 1868.7 <sup>a</sup> | 1876.9 | 1876.9  | 1877.3 | 1874.1 | 1874.1  | 1876.0 |
| gdb 1386 | 1840.2 <sup>a</sup> | 1840.5 | 1840.5  | 1838.3 | 1831.9 | 1831.9  | 1830.8 |
| gdb 1387 | 1848.2 <sup>a</sup> | 1847.7 | 1847.7  | 1847.9 | 1843.3 | 1843.3  | 1841.3 |
| gdb 1388 | 1843.1 <sup>a</sup> | 1844.2 | 1844.2  | 1845.4 | 1842.0 | 1842.0  | 1843.2 |
| gdb 1389 | 1862.9 <sup>a</sup> | 1867.6 | 1867.6  | 1868.4 | 1866.3 | 1866.2  | 1869.3 |
| gdb 1390 | 1884.5 <sup>a</sup> | 1877.5 | 1877.5  | 1879.3 | 1874.7 | 1874.7  | 1878.5 |
| gdb 1391 | 1873.0 <sup>a</sup> | 1875.3 | 1875.3  | 1877.2 | 1877.7 | 1877.7  | 1879.4 |
| gdb 1392 | 1859.4 <sup>a</sup> | 1864.2 | 1864.2  | 1864.3 | 1862.3 | 1862.2  | 1864.9 |
| gdb 1393 | 1863.8 <sup>a</sup> | 1868.3 | 1868.3  | 1868.9 | 1866.4 | 1866.4  | 1868.7 |
| gdb 1394 | 1870.5 <sup>a</sup> | 1874.5 | 1874.5  | 1876.3 | 1876.3 | 1876.3  | 1877.7 |
| gdb 1395 | 1883.2 <sup>a</sup> | 1877.6 | 1877.6  | 1879.1 | 1874.9 | 1874.4  | 1878.4 |
| gdb 1396 | 1860.8 <sup>a</sup> | 1865.9 | 1865.9  | 1866.2 | 1864.0 | 1863.9  | 1866.7 |
| gdb 1397 | 1862.3 <sup>a</sup> | 1868.9 | 1868.9  | 1869.3 | 1867.0 | 1867.0  | 1869.7 |
| gdb 1398 | 1869.3 <sup>a</sup> | 1875.0 | 1875.0  | 1877.9 | 1877.1 | 1877.1  | 1878.9 |
| gdb 1399 | 1880.1 <sup>a</sup> | 1883.0 | 1883.0  | 1881.8 | 1879.2 | 1879.2  | 1877.0 |
| gdb 1400 | 1897.7 <sup>a</sup> | 1884.6 | 1884.6  | 1885.5 | 1884.0 | 1884.0  | 1885.2 |
| gdb 1401 | 1883.3 <sup>a</sup> | 1890.9 | 1890.9  | 1892.7 | 1892.0 | 1891.9  | 1891.7 |
| gdb 1402 | 1924.1 <sup>a</sup> | 1939.1 | 1939.1  | 1939.5 | 1940.6 | 1940.6  | 1940.9 |
| gdb 1403 | 1863.1 <sup>a</sup> | 1856.1 | 1856.1  | 1859.1 | 1857.4 | 1857.3  | 1858.0 |
| gdb 1404 | 1894.8 <sup>a</sup> | 1899.4 | 1899.4  | 1899.6 | 1901.9 | 1901.9  | 1902.8 |
| gdb 1405 | 1900.7 <sup>a</sup> | 1909.7 | 1909.7  | 1911.3 | 1911.6 | 1911.6  | 1913.5 |
| gdb 1406 | 1884.3 <sup>a</sup> | 1876.6 | 1876.6  | 1879.1 | 1879.7 | 1879.7  | 1881.0 |
| gdb 1407 | 1895.3 <sup>a</sup> | 1871.3 | 1871.3  | 1872.5 | 1871.3 | 1871.3  | 1873.5 |
| gdb 1408 | 1885.7 <sup>a</sup> | 1878.7 | 1878.7  | 1880.7 | 1882.0 | 1882.0  | 1882.8 |
| gdb 1409 | 1857.3 <sup>a</sup> | 1851.1 | 1851.1  | 1853.3 | 1848.9 | 1848.9  | 1849.3 |
| gdb 1410 | 1842.5 <sup>a</sup> | 1834.4 | 1834.4  | 1837.6 | 1833.2 | 1833.2  | 1835.1 |
| gdb 1411 | 1865.5 <sup>a</sup> | 1853.8 | 1853.8  | 1857.4 | 1854.5 | 1854.5  | 1854.9 |
| gdb 1412 | 1854.5 <sup>a</sup> | 1839.7 | 1839.7  | 1842.5 | 1838.9 | 1838.9  | 1839.7 |
| gdb 1413 | 1886.8 <sup>a</sup> | 1880.4 | 1880.4  | 1882.8 | 1872.5 | 1872.5  | 1875.5 |
| gdb 1414 | 1895.7 <sup>a</sup> | 1888.3 | 1888.3  | 1891.1 | 1885.8 | 1885.7  | 1887.1 |
| gdb 1415 | 1852.9 <sup>a</sup> | 1827.0 | 1827.0  | 1832.9 | 1829.8 | 1829.8  | 1832.0 |
| gdb 1416 | 1841.1 <sup>a</sup> | 1816.7 | 1816.7  | 1820.5 | 1816.7 | 1816.7  | 1817.9 |
| gdb 1417 | 1838.0 <sup>a</sup> | 1814.3 | 1814.3  | 1818.1 | 1813.3 | 1813.3  | 1814.1 |
| gdb 1418 | 1851.4 <sup>a</sup> | 1826.6 | 1826.6  | 1832.4 | 1829.2 | 1829.2  | 1831.1 |
| gdb 1419 | 1839.1 <sup>a</sup> | 1815.6 | 1815.6  | 1819.1 | 1815.3 | 1815.2  | 1816.2 |
| gdb 1420 | 1834.1 <sup>a</sup> | 1826.9 | 1826.9  | 1829.2 | 1830.9 | 1830.9  | 1830.5 |
| gdb 1421 | 1838.2 <sup>a</sup> | 1830.5 | 1830.5  | 1829.8 | 1827.4 | 1827.4  | 1824.5 |
| gdb 1422 | 1832.2 <sup>a</sup> | 1825.9 | 1825.9  | 1825.2 | 1822.7 | 1822.7  | 1819.9 |
| gdb 1423 | 1835.7 <sup>a</sup> | 1828.7 | 1828.7  | 1830.9 | 1831.7 | 1831.7  | 1830.9 |
| gdb 1424 | 1835.1 <sup>a</sup> | 1828.9 | 1828.9  | 1828.0 | 1825.2 | 1825.2  | 1822.4 |
| gdb 1425 | 1875.6 <sup>a</sup> | 1873.4 | 1873.4  | 1876.8 | 1870.1 | 1870.1  | 1872.1 |
| gdb 1426 | 1877.7 <sup>a</sup> | 1871.7 | 1871.7  | 1875.0 | 1869.5 | 1869.5  | 1871.7 |
| gdb 1427 | 1865.8 <sup>a</sup> | 1849.8 | 1849.8  | 1855.0 | 1848.6 | 1848.6  | 1852.0 |

... continued on next page ...

Table S73: ... continued from previous page ...

| Species  | Ref.                | OM2    | OM2-D3T | ODM2   | OM3    | OM3-D3T | ODM3   |
|----------|---------------------|--------|---------|--------|--------|---------|--------|
| gdb 1428 | 1886.1 <sup>a</sup> | 1882.2 | 1882.2  | 1885.0 | 1885.1 | 1885.1  | 1886.5 |
| gdb 1429 | 1882.7 <sup>a</sup> | 1876.1 | 1876.1  | 1878.2 | 1879.6 | 1879.6  | 1880.1 |
| gdb 1430 | 1892.4 <sup>a</sup> | 1869.8 | 1869.8  | 1870.6 | 1869.3 | 1869.3  | 1871.2 |
| gdb 1431 | 1885.2 <sup>a</sup> | 1878.1 | 1878.1  | 1879.9 | 1881.3 | 1881.3  | 1881.9 |
| gdb 1432 | 1910.8 <sup>a</sup> | 1906.0 | 1906.0  | 1906.7 | 1904.2 | 1904.2  | 1906.6 |
| gdb 1433 | 1900.8 <sup>a</sup> | 1907.1 | 1907.1  | 1908.1 | 1910.4 | 1910.4  | 1910.7 |
| gdb 1434 | 1888.0 <sup>a</sup> | 1887.2 | 1887.2  | 1888.7 | 1883.3 | 1883.3  | 1884.2 |
| gdb 1435 | 1898.7 <sup>a</sup> | 1897.0 | 1897.0  | 1899.9 | 1896.9 | 1896.9  | 1898.3 |
| gdb 1436 | 1865.7 <sup>a</sup> | 1856.1 | 1856.1  | 1858.0 | 1856.1 | 1856.1  | 1858.1 |
| gdb 1437 | 1873.6 <sup>a</sup> | 1870.3 | 1870.3  | 1872.4 | 1873.5 | 1873.5  | 1874.7 |
| gdb 1438 | 1849.8 <sup>a</sup> | 1844.2 | 1844.2  | 1844.4 | 1839.1 | 1839.1  | 1838.2 |
| gdb 1439 | 1866.5 <sup>a</sup> | 1854.8 | 1854.8  | 1857.8 | 1856.6 | 1856.5  | 1858.0 |
| gdb 1440 | 1781.5 <sup>a</sup> | 1762.3 | 1762.3  | 1764.3 | 1758.6 | 1758.6  | 1758.7 |
| gdb 1441 | 1805.4 <sup>a</sup> | 1785.4 | 1785.4  | 1789.3 | 1785.3 | 1785.3  | 1787.2 |
| gdb 1442 | 1805.4 <sup>a</sup> | 1786.6 | 1786.6  | 1790.7 | 1786.0 | 1786.0  | 1787.9 |
| gdb 1443 | 1817.5 <sup>a</sup> | 1809.1 | 1809.1  | 1810.2 | 1804.9 | 1804.8  | 1802.5 |
| gdb 1444 | 1888.4 <sup>a</sup> | 1887.7 | 1887.7  | 1888.8 | 1884.3 | 1884.3  | 1885.0 |
| gdb 1445 | 1903.3 <sup>a</sup> | 1894.4 | 1894.4  | 1896.6 | 1891.0 | 1890.9  | 1894.0 |
| gdb 1446 | 1898.1 <sup>a</sup> | 1897.2 | 1897.2  | 1900.1 | 1897.7 | 1897.7  | 1899.6 |
| gdb 1447 | 1850.9 <sup>a</sup> | 1844.5 | 1844.5  | 1842.8 | 1834.8 | 1834.8  | 1832.3 |
| gdb 1448 | 1864.3 <sup>a</sup> | 1855.9 | 1855.9  | 1857.3 | 1850.0 | 1850.0  | 1848.9 |
| gdb 1449 | 1854.6 <sup>a</sup> | 1854.4 | 1854.4  | 1855.0 | 1849.5 | 1849.5  | 1847.7 |
| gdb 1450 | 1824.6 <sup>a</sup> | 1811.8 | 1811.8  | 1809.3 | 1803.5 | 1803.5  | 1799.0 |
| gdb 1451 | 1841.2 <sup>a</sup> | 1821.9 | 1821.9  | 1823.1 | 1819.2 | 1819.2  | 1817.9 |
| gdb 1452 | 1830.6 <sup>a</sup> | 1822.5 | 1822.5  | 1823.6 | 1820.1 | 1820.1  | 1818.2 |
| gdb 1453 | 1845.1 <sup>a</sup> | 1840.9 | 1840.9  | 1841.7 | 1839.2 | 1839.1  | 1839.1 |
| gdb 1454 | 1863.8 <sup>a</sup> | 1853.6 | 1853.6  | 1857.5 | 1856.1 | 1856.1  | 1858.6 |
| gdb 1455 | 1885.3 <sup>a</sup> | 1885.2 | 1885.2  | 1887.5 | 1880.7 | 1880.7  | 1882.0 |
| gdb 1456 | 1849.3 <sup>a</sup> | 1841.6 | 1841.5  | 1837.7 | 1831.1 | 1831.1  | 1825.3 |
| gdb 1457 | 1853.1 <sup>a</sup> | 1848.5 | 1848.5  | 1847.7 | 1843.5 | 1843.5  | 1840.1 |
| gdb 1458 | 1853.1 <sup>a</sup> | 1850.4 | 1850.4  | 1849.8 | 1845.3 | 1845.3  | 1841.9 |
| gdb 1459 | 1868.9 <sup>a</sup> | 1869.5 | 1869.5  | 1868.5 | 1865.0 | 1865.0  | 1863.7 |
| gdb 1460 | 1877.0 <sup>a</sup> | 1880.5 | 1880.5  | 1882.8 | 1881.2 | 1881.2  | 1882.2 |
| gdb 1461 | 1868.8 <sup>a</sup> | 1865.3 | 1865.3  | 1861.1 | 1854.2 | 1854.2  | 1849.2 |
| gdb 1462 | 1875.8 <sup>a</sup> | 1877.4 | 1877.3  | 1876.3 | 1871.3 | 1871.3  | 1868.0 |
| gdb 1463 | 1910.9 <sup>a</sup> | 1909.6 | 1909.5  | 1910.5 | 1906.3 | 1906.3  | 1908.3 |
| gdb 1464 | 1902.0 <sup>a</sup> | 1905.6 | 1905.6  | 1903.9 | 1900.9 | 1900.9  | 1898.6 |
| gdb 1465 | 1902.8 <sup>a</sup> | 1911.2 | 1911.2  | 1911.9 | 1911.5 | 1911.5  | 1910.7 |
| gdb 1466 | 1854.6 <sup>a</sup> | 1843.7 | 1843.7  | 1843.3 | 1840.7 | 1840.7  | 1838.1 |
| gdb 1467 | 1846.5 <sup>a</sup> | 1829.9 | 1829.9  | 1832.9 | 1832.0 | 1831.9  | 1832.7 |
| gdb 1468 | 1859.1 <sup>a</sup> | 1848.8 | 1848.8  | 1852.1 | 1841.3 | 1841.3  | 1843.4 |
| gdb 1469 | 1869.3 <sup>a</sup> | 1858.5 | 1858.5  | 1862.2 | 1854.5 | 1854.5  | 1856.2 |
| gdb 1470 | 1861.4 <sup>a</sup> | 1856.1 | 1856.1  | 1861.0 | 1851.9 | 1851.9  | 1855.2 |
| gdb 1471 | 1869.3 <sup>a</sup> | 1857.9 | 1857.9  | 1861.8 | 1854.7 | 1854.7  | 1856.9 |
| gdb 1472 | 1866.1 <sup>a</sup> | 1859.5 | 1859.5  | 1864.0 | 1856.2 | 1856.2  | 1858.7 |
| gdb 1473 | 1876.7 <sup>a</sup> | 1869.6 | 1869.6  | 1868.3 | 1866.6 | 1866.6  | 1864.1 |
| gdb 1474 | 1860.0 <sup>a</sup> | 1859.9 | 1859.9  | 1862.0 | 1859.6 | 1859.6  | 1860.4 |
| gdb 1475 | 1887.4 <sup>a</sup> | 1881.0 | 1881.0  | 1883.9 | 1883.3 | 1883.3  | 1884.2 |
| gdb 1476 | 1912.7 <sup>a</sup> | 1907.4 | 1907.4  | 1908.1 | 1905.4 | 1905.3  | 1907.5 |
| gdb 1477 | 1891.4 <sup>a</sup> | 1895.6 | 1895.6  | 1897.4 | 1895.0 | 1895.0  | 1897.0 |
| gdb 1478 | 1902.0 <sup>a</sup> | 1906.3 | 1906.3  | 1907.4 | 1909.5 | 1909.4  | 1909.4 |
| gdb 1479 | 1867.8 <sup>a</sup> | 1858.5 | 1858.5  | 1860.1 | 1858.3 | 1858.3  | 1859.9 |
| gdb 1480 | 1868.4 <sup>a</sup> | 1856.8 | 1856.8  | 1858.0 | 1856.2 | 1856.2  | 1858.1 |
| gdb 1481 | 1877.8 <sup>a</sup> | 1873.3 | 1873.3  | 1874.9 | 1875.8 | 1875.8  | 1876.4 |
| gdb 1482 | 1882.1 <sup>a</sup> | 1880.3 | 1880.3  | 1883.0 | 1877.9 | 1877.9  | 1880.5 |
| gdb 1483 | 1896.4 <sup>a</sup> | 1893.2 | 1893.2  | 1896.0 | 1894.0 | 1893.9  | 1895.8 |
| gdb 1484 | 1889.8 <sup>a</sup> | 1894.5 | 1894.5  | 1897.7 | 1889.8 | 1889.7  | 1892.7 |
| gdb 1485 | 1874.7 <sup>a</sup> | 1875.3 | 1875.3  | 1877.7 | 1872.9 | 1872.9  | 1875.2 |
| gdb 1486 | 1879.0 <sup>a</sup> | 1878.7 | 1878.7  | 1881.6 | 1876.5 | 1876.5  | 1879.3 |
| gdb 1487 | 1882.6 <sup>a</sup> | 1891.9 | 1891.9  | 1894.5 | 1891.8 | 1891.7  | 1892.4 |
| gdb 1488 | 1877.8 <sup>a</sup> | 1876.1 | 1876.1  | 1878.6 | 1875.7 | 1875.7  | 1878.3 |
| gdb 1489 | 1883.6 <sup>a</sup> | 1884.0 | 1884.0  | 1886.8 | 1878.4 | 1878.4  | 1880.4 |
| gdb 1490 | 1886.1 <sup>a</sup> | 1886.1 | 1886.1  | 1889.3 | 1881.9 | 1881.9  | 1884.6 |
| gdb 1491 | 1884.1 <sup>a</sup> | 1883.6 | 1883.6  | 1886.5 | 1879.7 | 1879.7  | 1882.3 |
| gdb 1492 | 1887.3 <sup>a</sup> | 1888.0 | 1888.0  | 1887.1 | 1881.6 | 1881.6  | 1878.9 |

... continued on next page ...

Table S73: ... continued from previous page ...

| Species  | Ref.                | OM2    | OM2-D3T | ODM2   | OM3    | OM3-D3T | ODM3   |
|----------|---------------------|--------|---------|--------|--------|---------|--------|
| gdb 1493 | 1904.6 <sup>a</sup> | 1912.7 | 1912.7  | 1914.6 | 1912.8 | 1912.7  | 1914.5 |
| gdb 1494 | 1889.0 <sup>a</sup> | 1885.8 | 1885.8  | 1884.8 | 1880.4 | 1880.4  | 1877.9 |
| gdb 1495 | 1915.2 <sup>a</sup> | 1916.0 | 1916.0  | 1918.0 | 1911.9 | 1911.8  | 1915.0 |
| gdb 1496 | 1910.6 <sup>a</sup> | 1917.2 | 1917.2  | 1918.2 | 1916.4 | 1916.4  | 1916.4 |
| gdb 1497 | 1917.2 <sup>a</sup> | 1928.2 | 1928.2  | 1928.1 | 1930.2 | 1930.2  | 1930.4 |
| gdb 1498 | 1879.2 <sup>a</sup> | 1882.3 | 1882.3  | 1880.8 | 1877.7 | 1877.7  | 1874.9 |
| gdb 1499 | 1903.8 <sup>a</sup> | 1891.7 | 1891.7  | 1892.3 | 1889.7 | 1889.6  | 1890.4 |
| gdb 1500 | 1887.8 <sup>a</sup> | 1894.0 | 1894.0  | 1896.2 | 1895.3 | 1895.3  | 1895.3 |
| gdb 1501 | 1900.0 <sup>a</sup> | 1908.5 | 1908.5  | 1910.1 | 1910.6 | 1910.5  | 1912.5 |
| gdb 1502 | 1899.4 <sup>a</sup> | 1901.5 | 1901.5  | 1899.5 | 1896.5 | 1896.5  | 1893.8 |
| gdb 1503 | 1917.6 <sup>a</sup> | 1915.7 | 1915.7  | 1916.3 | 1912.5 | 1912.5  | 1914.1 |
| gdb 1504 | 1906.6 <sup>a</sup> | 1913.4 | 1913.4  | 1914.7 | 1914.2 | 1914.2  | 1914.0 |
| gdb 1505 | 1924.1 <sup>a</sup> | 1939.2 | 1939.2  | 1939.6 | 1941.3 | 1941.3  | 1942.0 |
| gdb 1506 | 1920.2 <sup>a</sup> | 1921.9 | 1921.9  | 1922.4 | 1917.8 | 1917.7  | 1920.7 |
| gdb 1507 | 1912.9 <sup>a</sup> | 1919.6 | 1919.6  | 1921.0 | 1920.1 | 1920.1  | 1921.1 |
| gdb 1508 | 1864.4 <sup>a</sup> | 1871.7 | 1871.7  | 1875.6 | 1870.1 | 1870.1  | 1871.4 |
| gdb 1509 | 1900.0 <sup>a</sup> | 1909.4 | 1909.3  | 1911.1 | 1906.2 | 1906.2  | 1908.8 |
| gdb 1510 | 1905.2 <sup>a</sup> | 1912.9 | 1912.8  | 1914.6 | 1913.0 | 1913.0  | 1914.5 |
| gdb 1511 | 1858.8 <sup>a</sup> | 1855.7 | 1855.7  | 1858.9 | 1857.7 | 1857.6  | 1858.6 |
| gdb 1512 | 1895.2 <sup>a</sup> | 1902.0 | 1902.0  | 1902.0 | 1902.8 | 1902.8  | 1903.5 |
| gdb 1513 | 1833.7 <sup>a</sup> | 1814.9 | 1814.9  | 1813.5 | 1808.1 | 1808.1  | 1804.2 |
| gdb 1514 | 1829.9 <sup>a</sup> | 1816.3 | 1816.3  | 1817.6 | 1816.7 | 1816.7  | 1815.8 |
| gdb 1515 | 1896.9 <sup>a</sup> | 1877.8 | 1877.8  | 1879.3 | 1878.6 | 1878.6  | 1881.2 |
| gdb 1516 | 1884.6 <sup>a</sup> | 1882.8 | 1882.8  | 1882.3 | 1880.5 | 1880.5  | 1878.9 |
| gdb 1517 | 1882.5 <sup>a</sup> | 1884.0 | 1884.0  | 1886.5 | 1888.0 | 1888.0  | 1889.2 |
| gdb 1518 | 1853.3 <sup>a</sup> | 1840.0 | 1840.0  | 1836.5 | 1831.1 | 1831.1  | 1826.0 |
| gdb 1519 | 1851.2 <sup>a</sup> | 1842.6 | 1842.6  | 1842.3 | 1840.2 | 1840.2  | 1837.9 |
| gdb 1520 | 1847.6 <sup>a</sup> | 1830.1 | 1830.1  | 1833.1 | 1832.5 | 1832.5  | 1833.4 |
| gdb 1521 | 1898.2 <sup>a</sup> | 1882.2 | 1882.1  | 1882.8 | 1880.8 | 1880.8  | 1882.5 |
| gdb 1522 | 1876.6 <sup>a</sup> | 1870.7 | 1870.7  | 1872.7 | 1871.4 | 1871.4  | 1872.7 |
| gdb 1523 | 1884.2 <sup>a</sup> | 1883.6 | 1883.6  | 1882.6 | 1880.0 | 1880.0  | 1877.5 |
| gdb 1524 | 1885.6 <sup>a</sup> | 1886.6 | 1886.6  | 1889.0 | 1889.9 | 1889.9  | 1890.5 |
| gdb 1525 | 1878.9 <sup>a</sup> | 1876.2 | 1876.2  | 1878.9 | 1876.1 | 1876.1  | 1877.9 |
| gdb 1526 | 1895.3 <sup>a</sup> | 1900.4 | 1900.4  | 1900.2 | 1902.0 | 1901.9  | 1901.5 |
| gdb 1527 | 1844.0 <sup>a</sup> | 1842.9 | 1842.8  | 1845.6 | 1841.8 | 1841.7  | 1844.2 |
| gdb 1528 | 1874.6 <sup>a</sup> | 1871.3 | 1871.3  | 1869.8 | 1866.6 | 1866.5  | 1864.3 |
| gdb 1529 | 1874.6 <sup>a</sup> | 1866.4 | 1866.4  | 1868.1 | 1866.2 | 1866.2  | 1867.4 |
| gdb 1530 | 1881.3 <sup>a</sup> | 1882.5 | 1882.4  | 1884.1 | 1883.5 | 1883.5  | 1883.8 |
| gdb 1531 | 1878.3 <sup>a</sup> | 1882.4 | 1882.4  | 1880.7 | 1877.7 | 1877.7  | 1874.6 |
| gdb 1532 | 1881.3 <sup>a</sup> | 1880.1 | 1880.1  | 1881.8 | 1879.8 | 1879.8  | 1879.8 |
| gdb 1533 | 1885.5 <sup>a</sup> | 1893.0 | 1893.0  | 1894.7 | 1893.8 | 1893.8  | 1893.0 |
| gdb 1534 | 1885.4 <sup>a</sup> | 1886.1 | 1886.1  | 1885.2 | 1880.4 | 1880.4  | 1878.1 |
| gdb 1535 | 1872.1 <sup>a</sup> | 1875.8 | 1875.8  | 1879.4 | 1872.9 | 1872.8  | 1875.5 |
| gdb 1536 | 1871.7 <sup>a</sup> | 1863.1 | 1863.1  | 1865.1 | 1863.3 | 1863.3  | 1865.3 |
| gdb 1537 | 1879.0 <sup>a</sup> | 1879.3 | 1879.3  | 1881.6 | 1880.9 | 1880.9  | 1881.9 |
| gdb 1538 | 1900.2 <sup>a</sup> | 1887.5 | 1887.5  | 1890.0 | 1884.8 | 1884.8  | 1888.1 |
| gdb 1539 | 1880.6 <sup>a</sup> | 1880.2 | 1880.2  | 1882.8 | 1878.4 | 1878.4  | 1880.7 |
| gdb 1540 | 1885.5 <sup>a</sup> | 1893.1 | 1893.1  | 1896.3 | 1893.9 | 1893.9  | 1895.5 |
| gdb 1541 | 1863.6 <sup>a</sup> | 1854.0 | 1854.0  | 1857.2 | 1849.7 | 1849.7  | 1852.9 |
| gdb 1542 | 1870.4 <sup>a</sup> | 1861.1 | 1861.1  | 1864.1 | 1859.4 | 1859.3  | 1861.3 |
| gdb 1543 | 1854.8 <sup>a</sup> | 1842.1 | 1842.1  | 1845.3 | 1836.9 | 1836.8  | 1838.5 |
| gdb 1544 | 1859.6 <sup>a</sup> | 1847.5 | 1847.5  | 1850.5 | 1845.9 | 1845.9  | 1846.7 |
| gdb 1545 | 1846.4 <sup>a</sup> | 1839.0 | 1839.0  | 1839.2 | 1830.6 | 1830.6  | 1829.9 |
| gdb 1546 | 1851.2 <sup>a</sup> | 1852.2 | 1852.2  | 1853.0 | 1846.4 | 1846.4  | 1844.8 |
| gdb 1547 | 1900.1 <sup>a</sup> | 1887.7 | 1887.7  | 1890.1 | 1885.1 | 1885.0  | 1888.6 |
| gdb 1548 | 1884.4 <sup>a</sup> | 1883.3 | 1883.3  | 1886.5 | 1881.7 | 1881.7  | 1884.8 |
| gdb 1549 | 1887.1 <sup>a</sup> | 1894.3 | 1894.3  | 1897.7 | 1895.1 | 1895.1  | 1897.0 |
| gdb 1550 | 1874.2 <sup>a</sup> | 1871.7 | 1871.7  | 1870.3 | 1866.5 | 1866.5  | 1864.4 |
| gdb 1551 | 1874.4 <sup>a</sup> | 1866.0 | 1866.0  | 1867.6 | 1865.2 | 1865.2  | 1866.9 |
| gdb 1552 | 1883.5 <sup>a</sup> | 1883.8 | 1883.8  | 1885.6 | 1884.4 | 1884.4  | 1884.9 |
| gdb 1553 | 1886.8 <sup>a</sup> | 1885.3 | 1885.3  | 1886.7 | 1881.6 | 1881.6  | 1882.3 |
| gdb 1554 | 1887.1 <sup>a</sup> | 1886.6 | 1886.6  | 1889.3 | 1884.4 | 1884.3  | 1886.8 |
| gdb 1555 | 1897.8 <sup>a</sup> | 1895.8 | 1895.8  | 1898.9 | 1896.6 | 1896.6  | 1898.8 |
| gdb 1556 | 1890.8 <sup>a</sup> | 1901.0 | 1901.0  | 1902.2 | 1889.2 | 1889.2  | 1892.3 |
| gdb 1557 | 1895.8 <sup>a</sup> | 1902.1 | 1902.1  | 1904.5 | 1896.8 | 1896.8  | 1898.5 |

... continued on next page ...

Table S73: ... continued from previous page ...

| Species  | Ref.                | OM2    | OM2-D3T | ODM2   | OM3    | OM3-D3T | ODM3   |
|----------|---------------------|--------|---------|--------|--------|---------|--------|
| gdb 1558 | 1897.8 <sup>a</sup> | 1901.5 | 1901.5  | 1899.5 | 1896.3 | 1896.3  | 1893.5 |
| gdb 1559 | 1895.9 <sup>a</sup> | 1904.0 | 1904.0  | 1905.8 | 1902.1 | 1902.1  | 1903.5 |
| gdb 1560 | 1904.5 <sup>a</sup> | 1912.5 | 1912.5  | 1913.7 | 1912.8 | 1912.8  | 1912.0 |
| gdb 1561 | 1891.5 <sup>a</sup> | 1888.8 | 1888.8  | 1887.8 | 1882.6 | 1882.6  | 1880.3 |
| gdb 1562 | 1870.1 <sup>a</sup> | 1862.5 | 1862.5  | 1865.3 | 1861.1 | 1861.1  | 1863.0 |
| gdb 1563 | 1869.1 <sup>a</sup> | 1869.1 | 1869.1  | 1871.4 | 1865.9 | 1865.9  | 1867.6 |
| gdb 1564 | 1869.4 <sup>a</sup> | 1873.9 | 1873.9  | 1877.4 | 1871.3 | 1871.3  | 1873.7 |
| gdb 1565 | 1910.1 <sup>a</sup> | 1915.9 | 1915.9  | 1917.1 | 1916.8 | 1916.8  | 1917.7 |
| gdb 1566 | 1869.0 <sup>a</sup> | 1868.9 | 1868.9  | 1871.6 | 1865.8 | 1865.8  | 1867.7 |
| gdb 1567 | 1923.2 <sup>a</sup> | 1921.1 | 1921.1  | 1921.9 | 1916.7 | 1916.7  | 1919.8 |
| gdb 1568 | 1916.9 <sup>a</sup> | 1921.4 | 1921.4  | 1923.1 | 1921.4 | 1921.4  | 1922.3 |
| gdb 1569 | 1887.9 <sup>a</sup> | 1887.6 | 1887.6  | 1886.8 | 1881.1 | 1881.1  | 1878.3 |
| gdb 1570 | 1905.7 <sup>a</sup> | 1914.9 | 1914.9  | 1916.9 | 1914.7 | 1914.7  | 1916.3 |
| gdb 1571 | 1887.8 <sup>a</sup> | 1886.8 | 1886.8  | 1885.7 | 1880.8 | 1880.8  | 1877.9 |
| gdb 1572 | 1912.8 <sup>a</sup> | 1919.2 | 1919.2  | 1920.4 | 1918.9 | 1918.8  | 1919.1 |
| gdb 1573 | 1916.5 <sup>a</sup> | 1928.3 | 1928.3  | 1928.2 | 1929.6 | 1929.6  | 1929.4 |
| gdb 1574 | 1919.7 <sup>a</sup> | 1915.7 | 1915.7  | 1917.2 | 1910.8 | 1910.8  | 1914.5 |
| gdb 1575 | 1905.9 <sup>a</sup> | 1911.7 | 1911.7  | 1913.1 | 1907.9 | 1907.9  | 1910.3 |
| gdb 1576 | 1915.0 <sup>a</sup> | 1919.3 | 1919.3  | 1920.8 | 1919.1 | 1919.0  | 1919.6 |
| gdb 1577 | 1869.0 <sup>a</sup> | 1880.7 | 1880.7  | 1883.2 | 1869.8 | 1869.7  | 1873.7 |
| gdb 1578 | 1872.1 <sup>a</sup> | 1882.9 | 1882.8  | 1885.4 | 1873.1 | 1873.0  | 1877.0 |
| gdb 1579 | 1872.6 <sup>a</sup> | 1881.2 | 1881.2  | 1884.7 | 1876.9 | 1876.8  | 1879.2 |
| gdb 1580 | 1902.0 <sup>a</sup> | 1908.1 | 1908.1  | 1909.3 | 1905.2 | 1905.2  | 1907.5 |
| gdb 1581 | 1908.6 <sup>a</sup> | 1913.7 | 1913.7  | 1915.0 | 1914.1 | 1914.1  | 1914.9 |
| gdb 1582 | 1859.4 <sup>a</sup> | 1862.0 | 1862.0  | 1865.3 | 1856.0 | 1855.9  | 1858.0 |
| gdb 1583 | 1867.5 <sup>a</sup> | 1875.1 | 1875.1  | 1878.9 | 1872.0 | 1872.0  | 1872.4 |
| gdb 1584 | 1861.4 <sup>a</sup> | 1862.8 | 1862.8  | 1866.0 | 1857.1 | 1857.1  | 1858.9 |
| gdb 1585 | 1859.1 <sup>a</sup> | 1856.9 | 1856.9  | 1860.6 | 1853.4 | 1853.3  | 1855.9 |
| gdb 1586 | 1899.8 <sup>a</sup> | 1909.3 | 1909.3  | 1910.6 | 1906.4 | 1906.4  | 1908.8 |
| gdb 1587 | 1907.2 <sup>a</sup> | 1916.1 | 1916.1  | 1917.1 | 1916.4 | 1916.3  | 1916.9 |
| gdb 1588 | 1906.5 <sup>a</sup> | 1912.5 | 1912.5  | 1913.9 | 1908.3 | 1908.3  | 1910.5 |
| gdb 1589 | 1914.0 <sup>a</sup> | 1917.9 | 1917.9  | 1918.9 | 1916.9 | 1916.9  | 1916.9 |
| gdb 1590 | 1869.3 <sup>a</sup> | 1878.9 | 1878.9  | 1881.3 | 1867.9 | 1867.9  | 1872.1 |
| gdb 1591 | 1871.5 <sup>a</sup> | 1879.9 | 1879.9  | 1883.3 | 1875.2 | 1875.2  | 1877.4 |
| gdb 1592 | 1872.4 <sup>a</sup> | 1878.8 | 1878.8  | 1882.4 | 1874.5 | 1874.5  | 1876.4 |
| gdb 1593 | 1825.9 <sup>a</sup> | 1813.5 | 1813.5  | 1812.0 | 1805.6 | 1805.6  | 1802.3 |
| gdb 1594 | 1835.3 <sup>a</sup> | 1826.0 | 1826.0  | 1826.9 | 1822.7 | 1822.3  | 1820.2 |
| gdb 1595 | 1842.1 <sup>a</sup> | 1823.8 | 1823.8  | 1825.0 | 1819.7 | 1819.7  | 1817.7 |
| gdb 1596 | 1837.7 <sup>a</sup> | 1824.1 | 1824.1  | 1823.5 | 1817.9 | 1817.8  | 1816.6 |
| gdb 1597 | 1843.4 <sup>a</sup> | 1831.5 | 1831.5  | 1834.2 | 1831.7 | 1831.7  | 1832.4 |
| gdb 1598 | 1849.8 <sup>a</sup> | 1840.7 | 1840.7  | 1840.0 | 1837.5 | 1837.5  | 1834.3 |
| gdb 1599 | 1878.6 <sup>a</sup> | 1879.5 | 1879.5  | 1882.4 | 1876.9 | 1876.9  | 1880.3 |
| gdb 1600 | 1883.2 <sup>a</sup> | 1883.1 | 1883.1  | 1884.3 | 1879.6 | 1879.5  | 1880.7 |
| gdb 1601 | 1896.1 <sup>a</sup> | 1889.0 | 1889.0  | 1891.9 | 1888.7 | 1888.7  | 1890.5 |
| gdb 1602 | 1887.2 <sup>a</sup> | 1890.9 | 1890.9  | 1892.5 | 1889.9 | 1889.9  | 1891.8 |
| gdb 1603 | 1890.0 <sup>a</sup> | 1892.7 | 1892.7  | 1894.1 | 1891.6 | 1891.5  | 1893.5 |
| gdb 1604 | 1894.4 <sup>a</sup> | 1894.7 | 1894.7  | 1895.5 | 1898.1 | 1898.1  | 1897.6 |
| gdb 1605 | 1868.5 <sup>a</sup> | 1873.9 | 1873.9  | 1876.4 | 1864.8 | 1864.8  | 1869.3 |
| gdb 1606 | 1871.4 <sup>a</sup> | 1878.0 | 1877.9  | 1880.5 | 1869.4 | 1869.4  | 1873.4 |
| gdb 1607 | 1871.8 <sup>a</sup> | 1877.0 | 1877.0  | 1880.4 | 1873.9 | 1873.8  | 1876.2 |
| gdb 1608 | 1878.9 <sup>a</sup> | 1879.7 | 1879.7  | 1878.8 | 1876.1 | 1876.1  | 1874.5 |
| gdb 1609 | 1901.6 <sup>a</sup> | 1888.1 | 1888.0  | 1889.4 | 1886.5 | 1886.5  | 1888.3 |
| gdb 1610 | 1882.7 <sup>a</sup> | 1890.4 | 1890.4  | 1892.6 | 1891.8 | 1891.8  | 1892.0 |
| gdb 1611 | 1890.8 <sup>a</sup> | 1897.1 | 1897.1  | 1897.1 | 1899.3 | 1899.2  | 1899.4 |
| gdb 1612 | 1893.6 <sup>a</sup> | 1903.9 | 1903.9  | 1905.9 | 1905.3 | 1905.2  | 1907.2 |
| gdb 1613 | 1895.4 <sup>a</sup> | 1901.9 | 1901.9  | 1902.0 | 1902.8 | 1902.8  | 1903.5 |
| gdb 1614 | 1871.3 <sup>a</sup> | 1875.1 | 1875.1  | 1872.1 | 1869.7 | 1869.7  | 1865.3 |
| gdb 1615 | 1873.9 <sup>a</sup> | 1877.7 | 1877.7  | 1877.6 | 1874.9 | 1874.9  | 1870.1 |
| gdb 1616 | 1882.6 <sup>a</sup> | 1883.8 | 1883.8  | 1884.7 | 1885.1 | 1884.9  | 1882.6 |
| gdb 1617 | 1896.0 <sup>a</sup> | 1905.0 | 1905.0  | 1904.9 | 1906.6 | 1906.6  | 1906.1 |
| gdb 1618 | 1886.4 <sup>a</sup> | 1894.4 | 1894.4  | 1894.8 | 1896.7 | 1896.7  | 1898.2 |
| gdb 1619 | 1871.4 <sup>a</sup> | 1870.4 | 1870.4  | 1868.0 | 1865.6 | 1865.6  | 1862.4 |
| gdb 1620 | 1876.2 <sup>a</sup> | 1873.7 | 1873.6  | 1871.5 | 1869.3 | 1869.3  | 1866.4 |
| gdb 1621 | 1873.9 <sup>a</sup> | 1876.7 | 1876.7  | 1877.5 | 1880.1 | 1880.1  | 1879.2 |
| gdb 1622 | 1834.9 <sup>a</sup> | 1815.8 | 1815.8  | 1814.3 | 1808.2 | 1808.7  | 1804.9 |

... continued on next page ...

Table S73: ... continued from previous page ...

| Species  | Ref.                | OM2    | OM2-D3T | ODM2   | OM3    | OM3-D3T | ODM3   |
|----------|---------------------|--------|---------|--------|--------|---------|--------|
| gdb 1623 | 1838.1 <sup>a</sup> | 1821.0 | 1821.0  | 1823.0 | 1820.0 | 1820.0  | 1818.7 |
| gdb 1624 | 1846.8 <sup>a</sup> | 1830.2 | 1830.2  | 1830.2 | 1829.5 | 1824.8  | 1822.9 |
| gdb 1625 | 1844.9 <sup>a</sup> | 1829.2 | 1829.2  | 1828.2 | 1823.7 | 1823.7  | 1822.1 |
| gdb 1626 | 1850.9 <sup>a</sup> | 1840.7 | 1840.6  | 1836.7 | 1830.8 | 1830.8  | 1825.2 |
| gdb 1627 | 1849.8 <sup>a</sup> | 1835.0 | 1835.0  | 1837.6 | 1836.1 | 1836.1  | 1836.7 |
| gdb 1628 | 1845.6 <sup>a</sup> | 1833.5 | 1833.5  | 1836.0 | 1834.5 | 1834.5  | 1835.3 |
| gdb 1629 | 1853.7 <sup>a</sup> | 1845.4 | 1845.4  | 1845.0 | 1841.8 | 1841.8  | 1838.6 |
| gdb 1630 | 1874.3 <sup>a</sup> | 1874.3 | 1874.3  | 1873.4 | 1866.8 | 1866.8  | 1865.8 |
| gdb 1631 | 1876.3 <sup>a</sup> | 1878.9 | 1878.9  | 1881.4 | 1877.5 | 1877.5  | 1878.9 |
| gdb 1632 | 1829.1 <sup>a</sup> | 1813.2 | 1813.2  | 1812.0 | 1806.3 | 1806.2  | 1803.2 |
| gdb 1633 | 1830.8 <sup>a</sup> | 1817.2 | 1817.2  | 1819.4 | 1816.4 | 1816.4  | 1815.8 |
| gdb 1634 | 1843.1 <sup>a</sup> | 1828.1 | 1828.1  | 1827.7 | 1823.0 | 1823.0  | 1821.9 |
| gdb 1635 | 1842.0 <sup>a</sup> | 1831.3 | 1831.3  | 1834.3 | 1833.3 | 1833.3  | 1834.6 |
| gdb 1636 | 1899.2 <sup>a</sup> | 1883.0 | 1883.0  | 1884.6 | 1881.7 | 1881.7  | 1884.1 |
| gdb 1637 | 1880.8 <sup>a</sup> | 1879.0 | 1879.0  | 1878.1 | 1876.2 | 1876.2  | 1874.5 |
| gdb 1638 | 1880.5 <sup>a</sup> | 1883.7 | 1883.7  | 1886.2 | 1887.1 | 1887.1  | 1887.8 |
| gdb 1639 | 1871.3 <sup>a</sup> | 1870.0 | 1870.0  | 1867.7 | 1866.2 | 1866.1  | 1863.1 |
| gdb 1640 | 1874.7 <sup>a</sup> | 1872.2 | 1872.2  | 1870.0 | 1869.1 | 1869.1  | 1866.1 |
| gdb 1641 | 1875.7 <sup>a</sup> | 1877.5 | 1877.5  | 1878.7 | 1880.4 | 1880.4  | 1879.6 |
| gdb 1642 | 1848.8 <sup>a</sup> | 1839.1 | 1839.1  | 1835.6 | 1829.7 | 1829.7  | 1824.7 |
| gdb 1643 | 1845.8 <sup>a</sup> | 1831.1 | 1831.0  | 1830.6 | 1825.5 | 1825.5  | 1823.8 |
| gdb 1644 | 1850.5 <sup>a</sup> | 1844.0 | 1844.0  | 1843.9 | 1840.9 | 1840.9  | 1838.4 |
| gdb 1645 | 1849.3 <sup>a</sup> | 1835.9 | 1835.9  | 1838.8 | 1837.0 | 1837.0  | 1837.7 |
| gdb 1646 | 1896.3 <sup>a</sup> | 1880.4 | 1880.4  | 1881.6 | 1878.8 | 1878.7  | 1881.1 |
| gdb 1647 | 1875.1 <sup>a</sup> | 1872.9 | 1872.9  | 1874.8 | 1871.7 | 1871.7  | 1873.3 |
| gdb 1648 | 1879.9 <sup>a</sup> | 1879.6 | 1879.6  | 1878.6 | 1876.2 | 1876.2  | 1874.2 |
| gdb 1649 | 1882.5 <sup>a</sup> | 1884.0 | 1884.0  | 1886.4 | 1887.0 | 1886.9  | 1887.4 |
| gdb 1650 | 1874.8 <sup>a</sup> | 1874.4 | 1874.4  | 1873.7 | 1866.4 | 1866.3  | 1865.8 |
| gdb 1651 | 1878.4 <sup>a</sup> | 1879.7 | 1879.7  | 1882.4 | 1878.5 | 1878.5  | 1880.2 |
| gdb 1652 | 1872.0 <sup>a</sup> | 1867.0 | 1867.0  | 1868.7 | 1867.1 | 1867.0  | 1868.9 |
| gdb 1653 | 1869.4 <sup>a</sup> | 1868.9 | 1868.9  | 1870.1 | 1867.4 | 1867.4  | 1869.3 |
| gdb 1654 | 1877.4 <sup>a</sup> | 1877.8 | 1877.8  | 1876.7 | 1873.4 | 1873.4  | 1871.1 |
| gdb 1655 | 1876.9 <sup>a</sup> | 1877.9 | 1877.9  | 1879.9 | 1880.6 | 1880.6  | 1881.1 |
| gdb 1656 | 1870.6 <sup>a</sup> | 1870.4 | 1870.4  | 1868.0 | 1866.4 | 1866.3  | 1863.4 |
| gdb 1657 | 1872.0 <sup>a</sup> | 1872.2 | 1872.2  | 1870.2 | 1868.1 | 1868.1  | 1865.0 |
| gdb 1658 | 1875.2 <sup>a</sup> | 1873.0 | 1872.8  | 1873.8 | 1876.4 | 1876.3  | 1875.5 |
| gdb 1659 | 1867.3 <sup>a</sup> | 1870.1 | 1870.1  | 1867.7 | 1865.7 | 1865.7  | 1863.1 |
| gdb 1660 | 1872.4 <sup>a</sup> | 1872.4 | 1872.4  | 1870.3 | 1868.6 | 1868.6  | 1865.3 |
| gdb 1661 | 1873.9 <sup>a</sup> | 1877.2 | 1876.2  | 1877.1 | 1879.9 | 1879.9  | 1878.0 |
| gdb 1662 | 1892.2 <sup>a</sup> | 1898.2 | 1898.2  | 1898.6 | 1900.9 | 1900.9  | 1901.8 |
| gdb 1663 | 1872.6 <sup>a</sup> | 1872.0 | 1872.0  | 1873.8 | 1871.6 | 1871.6  | 1872.8 |
| gdb 1664 | 1874.3 <sup>a</sup> | 1876.8 | 1876.8  | 1875.5 | 1872.4 | 1872.4  | 1870.7 |
| gdb 1665 | 1879.0 <sup>a</sup> | 1884.8 | 1884.8  | 1887.2 | 1885.4 | 1885.4  | 1885.6 |
| gdb 1666 | 1844.6 <sup>a</sup> | 1839.9 | 1839.9  | 1836.3 | 1829.3 | 1829.3  | 1824.1 |
| gdb 1667 | 1845.4 <sup>a</sup> | 1832.2 | 1832.2  | 1831.6 | 1825.8 | 1825.8  | 1823.8 |
| gdb 1668 | 1853.1 <sup>a</sup> | 1849.7 | 1849.7  | 1849.2 | 1844.5 | 1844.5  | 1841.4 |
| gdb 1669 | 1852.0 <sup>a</sup> | 1850.2 | 1850.2  | 1849.5 | 1844.7 | 1844.7  | 1841.1 |
| gdb 1670 | 1884.7 <sup>a</sup> | 1883.5 | 1883.5  | 1884.5 | 1879.3 | 1879.8  | 1881.5 |
| gdb 1671 | 1884.1 <sup>a</sup> | 1884.3 | 1884.3  | 1887.5 | 1881.6 | 1881.5  | 1884.5 |
| gdb 1672 | 1894.6 <sup>a</sup> | 1890.7 | 1890.7  | 1893.9 | 1890.6 | 1890.6  | 1892.7 |
| gdb 1673 | 1887.9 <sup>a</sup> | 1896.5 | 1896.5  | 1898.1 | 1894.7 | 1894.7  | 1896.3 |
| gdb 1674 | 1893.9 <sup>a</sup> | 1895.5 | 1895.5  | 1893.6 | 1891.4 | 1891.4  | 1889.5 |
| gdb 1675 | 1896.3 <sup>a</sup> | 1903.4 | 1903.4  | 1904.7 | 1904.1 | 1904.1  | 1904.1 |
| gdb 1676 | 1871.9 <sup>a</sup> | 1874.0 | 1874.0  | 1877.0 | 1871.4 | 1871.4  | 1874.8 |
| gdb 1677 | 1871.2 <sup>a</sup> | 1872.7 | 1872.7  | 1875.5 | 1870.4 | 1870.4  | 1873.8 |
| gdb 1678 | 1874.0 <sup>a</sup> | 1876.5 | 1876.5  | 1879.4 | 1873.9 | 1873.9  | 1876.6 |
| gdb 1679 | 1876.7 <sup>a</sup> | 1885.9 | 1885.9  | 1888.9 | 1885.5 | 1885.5  | 1886.9 |
| gdb 1680 | 1847.4 <sup>a</sup> | 1840.1 | 1840.1  | 1841.1 | 1838.8 | 1838.7  | 1839.1 |
| gdb 1681 | 1875.2 <sup>a</sup> | 1855.2 | 1855.2  | 1858.8 | 1853.5 | 1853.5  | 1858.5 |
| gdb 1682 | 1862.3 <sup>a</sup> | 1850.3 | 1850.3  | 1854.3 | 1853.5 | 1853.5  | 1856.1 |
| gdb 1683 | 1863.6 <sup>a</sup> | 1853.2 | 1853.1  | 1855.0 | 1853.9 | 1853.9  | 1856.5 |
| gdb 1684 | 1882.9 <sup>a</sup> | 1871.2 | 1871.2  | 1873.0 | 1870.1 | 1870.1  | 1873.6 |
| gdb 1685 | 1870.2 <sup>a</sup> | 1868.6 | 1868.5  | 1870.9 | 1871.7 | 1871.6  | 1873.3 |
| gdb 1686 | 1898.9 <sup>a</sup> | 1906.5 | 1906.5  | 1908.3 | 1909.6 | 1909.6  | 1912.0 |
| gdb 1687 | 1893.7 <sup>a</sup> | 1898.5 | 1898.5  | 1899.0 | 1900.1 | 1900.1  | 1901.0 |

... continued on next page ...

Table S73: ... continued from previous page ...

| Species  | Ref.                | OM2    | OM2-D3T | ODM2   | OM3    | OM3-D3T | ODM3   |
|----------|---------------------|--------|---------|--------|--------|---------|--------|
| gdb 1688 | 1889.6 <sup>a</sup> | 1882.5 | 1882.5  | 1884.4 | 1879.6 | 1879.6  | 1883.1 |
| gdb 1689 | 1869.4 <sup>a</sup> | 1868.1 | 1868.1  | 1867.2 | 1864.4 | 1864.3  | 1863.1 |
| gdb 1690 | 1868.9 <sup>a</sup> | 1860.9 | 1860.9  | 1863.0 | 1861.1 | 1861.0  | 1863.4 |
| gdb 1691 | 1877.2 <sup>a</sup> | 1878.9 | 1878.8  | 1881.0 | 1880.4 | 1880.3  | 1881.2 |
| gdb 1692 | 1915.5 <sup>a</sup> | 1915.9 | 1915.9  | 1917.3 | 1912.6 | 1912.5  | 1916.5 |
| gdb 1693 | 1902.2 <sup>a</sup> | 1911.2 | 1911.2  | 1913.1 | 1912.4 | 1912.4  | 1914.1 |
| gdb 1694 | 1898.6 <sup>a</sup> | 1906.8 | 1906.8  | 1908.3 | 1909.4 | 1909.4  | 1911.2 |
| gdb 1695 | 1897.3 <sup>a</sup> | 1905.4 | 1905.4  | 1907.5 | 1903.3 | 1903.2  | 1906.5 |
| gdb 1696 | 1915.2 <sup>a</sup> | 1913.5 | 1913.5  | 1915.0 | 1910.3 | 1910.3  | 1915.1 |
| gdb 1697 | 1903.3 <sup>a</sup> | 1911.3 | 1911.3  | 1912.8 | 1912.4 | 1912.3  | 1913.5 |
| gdb 1698 | 1880.7 <sup>a</sup> | 1883.6 | 1883.6  | 1882.5 | 1878.2 | 1878.2  | 1875.6 |
| gdb 1699 | 1841.8 <sup>a</sup> | 1841.8 | 1841.8  | 1845.3 | 1835.2 | 1835.1  | 1839.8 |
| gdb 1700 | 1851.3 <sup>a</sup> | 1849.4 | 1849.4  | 1852.7 | 1846.8 | 1846.7  | 1849.4 |
| gdb 1701 | 1917.7 <sup>a</sup> | 1929.9 | 1929.9  | 1930.5 | 1931.7 | 1931.9  | 1932.8 |
| gdb 1702 | 1892.5 <sup>a</sup> | 1903.7 | 1903.7  | 1904.5 | 1904.2 | 1904.2  | 1904.8 |
| gdb 1703 | 1873.8 <sup>a</sup> | 1877.9 | 1877.8  | 1876.5 | 1872.8 | 1872.8  | 1870.6 |
| gdb 1704 | 1868.8 <sup>a</sup> | 1868.3 | 1868.3  | 1869.9 | 1867.7 | 1867.7  | 1869.3 |
| gdb 1705 | 1871.5 <sup>a</sup> | 1875.1 | 1875.1  | 1876.3 | 1872.6 | 1872.5  | 1873.5 |
| gdb 1706 | 1880.2 <sup>a</sup> | 1885.5 | 1885.5  | 1887.2 | 1885.5 | 1885.4  | 1885.4 |
| gdb 1707 | 1876.3 <sup>a</sup> | 1879.9 | 1879.9  | 1878.6 | 1875.6 | 1875.5  | 1873.3 |
| gdb 1708 | 1896.6 <sup>a</sup> | 1884.7 | 1884.7  | 1885.5 | 1882.0 | 1882.0  | 1883.5 |
| gdb 1709 | 1877.7 <sup>a</sup> | 1878.2 | 1878.2  | 1879.9 | 1876.4 | 1876.4  | 1877.2 |
| gdb 1710 | 1882.1 <sup>a</sup> | 1889.2 | 1889.2  | 1890.9 | 1889.6 | 1889.6  | 1888.8 |
| gdb 1711 | 1893.6 <sup>a</sup> | 1903.5 | 1903.5  | 1905.0 | 1904.5 | 1904.5  | 1906.7 |
| gdb 1712 | 1894.9 <sup>a</sup> | 1895.0 | 1895.0  | 1893.0 | 1890.4 | 1890.3  | 1888.5 |
| gdb 1713 | 1885.0 <sup>a</sup> | 1890.4 | 1890.4  | 1892.5 | 1888.8 | 1888.8  | 1891.2 |
| gdb 1714 | 1891.8 <sup>a</sup> | 1899.2 | 1899.2  | 1900.6 | 1896.5 | 1896.5  | 1897.9 |
| gdb 1715 | 1900.0 <sup>a</sup> | 1902.8 | 1902.8  | 1903.9 | 1903.4 | 1903.4  | 1903.0 |
| gdb 1716 | 1874.2 <sup>a</sup> | 1877.0 | 1876.9  | 1875.9 | 1868.1 | 1868.1  | 1866.9 |
| gdb 1717 | 1879.7 <sup>a</sup> | 1882.7 | 1882.7  | 1881.5 | 1876.9 | 1876.9  | 1874.0 |
| gdb 1718 | 1897.9 <sup>a</sup> | 1904.3 | 1904.3  | 1906.1 | 1901.6 | 1901.6  | 1904.6 |
| gdb 1719 | 1909.0 <sup>a</sup> | 1909.7 | 1909.7  | 1911.2 | 1910.7 | 1910.7  | 1911.7 |
| gdb 1720 | 1840.6 <sup>a</sup> | 1837.3 | 1837.3  | 1834.7 | 1829.5 | 1829.5  | 1828.4 |
| gdb 1721 | 1843.9 <sup>a</sup> | 1842.4 | 1842.4  | 1843.1 | 1841.1 | 1841.1  | 1842.4 |
| gdb 1722 | 1918.8 <sup>a</sup> | 1930.1 | 1930.1  | 1930.6 | 1931.4 | 1931.4  | 1932.2 |
| gdb 1723 | 1896.5 <sup>a</sup> | 1901.1 | 1901.1  | 1903.1 | 1898.2 | 1898.1  | 1901.7 |
| gdb 1724 | 1898.2 <sup>a</sup> | 1905.1 | 1905.1  | 1906.6 | 1902.0 | 1902.0  | 1904.8 |
| gdb 1725 | 1908.2 <sup>a</sup> | 1910.1 | 1910.1  | 1911.3 | 1910.5 | 1910.5  | 1910.7 |
| gdb 1726 | 1866.7 <sup>a</sup> | 1871.0 | 1871.0  | 1873.4 | 1861.2 | 1861.2  | 1866.6 |
| gdb 1727 | 1862.5 <sup>a</sup> | 1865.1 | 1865.1  | 1868.6 | 1858.1 | 1858.1  | 1862.5 |
| gdb 1728 | 1867.9 <sup>a</sup> | 1868.0 | 1868.0  | 1871.1 | 1858.5 | 1858.5  | 1864.7 |
| gdb 1729 | 1864.6 <sup>a</sup> | 1871.1 | 1871.1  | 1873.8 | 1862.2 | 1862.2  | 1867.2 |
| gdb 1730 | 1872.5 <sup>a</sup> | 1875.7 | 1875.7  | 1879.1 | 1871.1 | 1871.1  | 1874.0 |
| gdb 1731 | 1873.7 <sup>a</sup> | 1877.0 | 1877.0  | 1880.3 | 1872.5 | 1872.5  | 1875.6 |
| gdb 1732 | 1848.3 <sup>a</sup> | 1830.9 | 1830.9  | 1834.2 | 1831.1 | 1831.0  | 1832.7 |
| gdb 1733 | 1859.9 <sup>a</sup> | 1846.6 | 1846.6  | 1850.3 | 1848.6 | 1848.6  | 1849.3 |
| gdb 1734 | 1857.2 <sup>a</sup> | 1839.4 | 1839.4  | 1842.3 | 1838.6 | 1838.6  | 1839.5 |
| gdb 1735 | 1872.4 <sup>a</sup> | 1865.9 | 1865.9  | 1869.4 | 1864.5 | 1864.5  | 1866.8 |
| gdb 1736 | 1864.5 <sup>a</sup> | 1852.8 | 1852.8  | 1855.4 | 1849.4 | 1849.4  | 1852.2 |
| gdb 1737 | 1874.3 <sup>a</sup> | 1870.6 | 1870.6  | 1873.3 | 1869.5 | 1869.5  | 1871.1 |
| gdb 1738 | 1870.9 <sup>a</sup> | 1863.4 | 1863.4  | 1867.1 | 1862.8 | 1862.7  | 1865.3 |
| gdb 1739 | 1873.3 <sup>a</sup> | 1861.6 | 1861.6  | 1863.9 | 1862.0 | 1862.0  | 1862.7 |
| gdb 1740 | 1881.0 <sup>a</sup> | 1874.8 | 1874.7  | 1877.9 | 1877.2 | 1877.2  | 1877.5 |
| gdb 1741 | 1847.2 <sup>a</sup> | 1831.6 | 1831.6  | 1834.5 | 1831.2 | 1831.2  | 1832.5 |
| gdb 1742 | 1858.3 <sup>a</sup> | 1843.9 | 1843.9  | 1847.7 | 1846.6 | 1846.6  | 1847.8 |
| gdb 1743 | 1851.0 <sup>a</sup> | 1835.3 | 1835.2  | 1837.8 | 1834.7 | 1834.7  | 1835.7 |
| gdb 1744 | 1873.7 <sup>a</sup> | 1875.2 | 1875.2  | 1879.5 | 1869.6 | 1869.6  | 1873.6 |
| gdb 1745 | 1876.9 <sup>a</sup> | 1885.1 | 1885.1  | 1890.0 | 1881.4 | 1881.3  | 1884.6 |
| gdb 1746 | 1878.4 <sup>a</sup> | 1880.2 | 1880.2  | 1884.2 | 1877.4 | 1877.4  | 1879.4 |
| gdb 1747 | 1869.7 <sup>a</sup> | 1865.0 | 1865.0  | 1867.6 | 1858.2 | 1858.2  | 1863.5 |
| gdb 1748 | 1860.6 <sup>a</sup> | 1848.8 | 1848.8  | 1851.2 | 1846.0 | 1846.0  | 1849.5 |
| gdb 1749 | 1861.4 <sup>a</sup> | 1848.6 | 1848.6  | 1851.8 | 1845.8 | 1845.8  | 1849.6 |
| gdb 1750 | 1870.5 <sup>a</sup> | 1861.8 | 1861.8  | 1865.2 | 1862.2 | 1862.2  | 1865.0 |
| gdb 1751 | 1868.3 <sup>a</sup> | 1861.4 | 1861.4  | 1864.6 | 1861.4 | 1861.4  | 1864.3 |
| gdb 1752 | 1871.1 <sup>a</sup> | 1865.1 | 1865.1  | 1868.8 | 1864.9 | 1864.9  | 1867.7 |

... continued on next page ...

Table S73: ... continued from previous page ...

| Species  | Ref.                | OM2    | OM2-D3T | ODM2   | OM3    | OM3-D3T | ODM3   |
|----------|---------------------|--------|---------|--------|--------|---------|--------|
| gdb 1753 | 1869.9 <sup>a</sup> | 1856.3 | 1856.3  | 1858.9 | 1857.6 | 1857.6  | 1858.9 |
| gdb 1754 | 1884.1 <sup>a</sup> | 1886.8 | 1886.8  | 1889.7 | 1882.6 | 1882.6  | 1886.0 |
| gdb 1755 | 1891.7 <sup>a</sup> | 1896.9 | 1896.8  | 1898.3 | 1889.4 | 1889.3  | 1892.9 |
| gdb 1756 | 1879.1 <sup>a</sup> | 1879.7 | 1879.7  | 1882.7 | 1875.9 | 1875.9  | 1879.7 |
| gdb 1757 | 1887.7 <sup>a</sup> | 1888.0 | 1887.9  | 1891.0 | 1888.1 | 1888.1  | 1890.2 |
| gdb 1758 | 1890.2 <sup>a</sup> | 1893.1 | 1893.1  | 1895.7 | 1892.8 | 1892.8  | 1894.4 |
| gdb 1759 | 1901.0 <sup>a</sup> | 1909.8 | 1909.8  | 1912.2 | 1908.5 | 1908.4  | 1910.9 |
| gdb 1760 | 1898.0 <sup>a</sup> | 1905.0 | 1905.0  | 1907.7 | 1903.7 | 1903.6  | 1906.6 |
| gdb 1761 | 1895.7 <sup>a</sup> | 1905.0 | 1905.0  | 1907.7 | 1903.2 | 1903.2  | 1905.7 |
| gdb 1762 | 1925.4 <sup>a</sup> | 1912.7 | 1912.7  | 1913.9 | 1911.4 | 1911.4  | 1913.6 |
| gdb 1763 | 1905.9 <sup>a</sup> | 1914.3 | 1914.3  | 1917.0 | 1916.0 | 1916.0  | 1917.1 |
| gdb 1764 | 1912.0 <sup>a</sup> | 1900.8 | 1900.8  | 1902.1 | 1898.2 | 1898.2  | 1900.4 |
| gdb 1765 | 1898.3 <sup>a</sup> | 1894.6 | 1894.6  | 1895.2 | 1892.2 | 1892.2  | 1892.3 |
| gdb 1766 | 1905.1 <sup>a</sup> | 1897.0 | 1897.0  | 1900.1 | 1898.5 | 1898.5  | 1900.3 |
| gdb 1767 | 1903.4 <sup>a</sup> | 1898.4 | 1898.4  | 1901.5 | 1899.6 | 1899.6  | 1901.6 |
| gdb 1768 | 1862.1 <sup>a</sup> | 1854.5 | 1854.5  | 1852.5 | 1846.1 | 1846.1  | 1842.9 |
| gdb 1769 | 1866.5 <sup>a</sup> | 1856.9 | 1856.9  | 1857.4 | 1852.1 | 1852.1  | 1850.6 |
| gdb 1770 | 1870.8 <sup>a</sup> | 1861.4 | 1861.4  | 1865.3 | 1862.2 | 1862.2  | 1863.3 |
| gdb 1771 | 1837.4 <sup>a</sup> | 1819.6 | 1819.6  | 1816.6 | 1812.7 | 1812.7  | 1807.2 |
| gdb 1772 | 1847.6 <sup>a</sup> | 1824.3 | 1824.3  | 1825.0 | 1822.1 | 1822.1  | 1818.4 |
| gdb 1773 | 1848.7 <sup>a</sup> | 1828.5 | 1828.5  | 1833.2 | 1831.5 | 1831.5  | 1832.6 |
| gdb 1774 | 1861.0 <sup>a</sup> | 1849.1 | 1849.1  | 1849.5 | 1848.6 | 1848.6  | 1848.2 |
| gdb 1775 | 1869.6 <sup>a</sup> | 1852.6 | 1852.6  | 1856.2 | 1855.8 | 1855.1  | 1857.3 |
| gdb 1776 | 1894.9 <sup>a</sup> | 1895.2 | 1895.2  | 1899.4 | 1893.9 | 1893.9  | 1896.2 |
| gdb 1777 | 1889.5 <sup>a</sup> | 1887.6 | 1887.6  | 1889.3 | 1886.1 | 1886.1  | 1887.6 |
| gdb 1778 | 1900.0 <sup>a</sup> | 1894.3 | 1894.3  | 1897.0 | 1895.9 | 1895.9  | 1897.1 |
| gdb 1779 | 1895.7 <sup>a</sup> | 1893.2 | 1893.2  | 1893.1 | 1890.2 | 1890.2  | 1889.2 |
| gdb 1780 | 1836.0 <sup>a</sup> | 1817.8 | 1817.8  | 1815.6 | 1810.7 | 1810.6  | 1806.2 |
| gdb 1781 | 1846.5 <sup>a</sup> | 1821.9 | 1821.9  | 1822.8 | 1818.8 | 1818.8  | 1817.2 |
| gdb 1782 | 1886.3 <sup>a</sup> | 1883.6 | 1883.6  | 1885.5 | 1881.7 | 1881.7  | 1884.0 |
| gdb 1783 | 1884.9 <sup>a</sup> | 1883.2 | 1883.2  | 1885.2 | 1880.8 | 1880.8  | 1883.1 |
| gdb 1784 | 1889.9 <sup>a</sup> | 1887.2 | 1887.1  | 1887.8 | 1884.1 | 1884.1  | 1884.3 |
| gdb 1785 | 1895.5 <sup>a</sup> | 1890.3 | 1890.3  | 1893.3 | 1890.9 | 1890.9  | 1892.9 |
| gdb 1786 | 1896.0 <sup>a</sup> | 1902.9 | 1902.9  | 1905.4 | 1900.3 | 1900.3  | 1903.2 |
| gdb 1787 | 1912.4 <sup>a</sup> | 1908.8 | 1908.8  | 1910.9 | 1904.6 | 1904.5  | 1908.4 |
| gdb 1788 | 1900.9 <sup>a</sup> | 1902.1 | 1902.1  | 1903.5 | 1899.4 | 1899.4  | 1900.3 |
| gdb 1789 | 1906.6 <sup>a</sup> | 1910.4 | 1910.4  | 1913.0 | 1911.0 | 1911.0  | 1912.2 |
| gdb 1790 | 1884.8 <sup>a</sup> | 1881.9 | 1881.9  | 1884.2 | 1880.3 | 1880.3  | 1883.0 |
| gdb 1791 | 1889.0 <sup>a</sup> | 1886.5 | 1886.5  | 1887.6 | 1883.9 | 1883.9  | 1885.1 |
| gdb 1792 | 1892.9 <sup>a</sup> | 1889.0 | 1889.0  | 1892.5 | 1890.4 | 1890.4  | 1893.2 |
| gdb 1793 | 1866.8 <sup>a</sup> | 1857.0 | 1857.0  | 1855.3 | 1848.8 | 1848.7  | 1846.0 |
| gdb 1794 | 1874.3 <sup>a</sup> | 1862.8 | 1862.8  | 1863.7 | 1858.1 | 1858.1  | 1857.0 |
| gdb 1795 | 1875.0 <sup>a</sup> | 1867.4 | 1867.4  | 1866.3 | 1859.0 | 1859.0  | 1857.6 |
| gdb 1796 | 1881.6 <sup>a</sup> | 1877.4 | 1877.4  | 1877.8 | 1872.0 | 1872.0  | 1870.8 |
| gdb 1797 | 1856.8 <sup>a</sup> | 1853.3 | 1853.3  | 1855.2 | 1845.8 | 1845.8  | 1846.9 |
| gdb 1798 | 1859.2 <sup>a</sup> | 1855.0 | 1855.0  | 1858.3 | 1850.8 | 1850.8  | 1852.4 |
| gdb 1799 | 1868.0 <sup>a</sup> | 1854.5 | 1854.5  | 1857.2 | 1848.4 | 1848.4  | 1850.7 |
| gdb 1800 | 1866.6 <sup>a</sup> | 1854.1 | 1854.1  | 1856.5 | 1847.7 | 1847.7  | 1849.7 |
| gdb 1801 | 1873.2 <sup>a</sup> | 1859.5 | 1859.5  | 1864.1 | 1857.0 | 1857.0  | 1860.5 |
| gdb 1802 | 1873.0 <sup>a</sup> | 1859.0 | 1859.0  | 1863.7 | 1856.2 | 1856.2  | 1860.0 |
| gdb 1803 | 1867.2 <sup>a</sup> | 1852.3 | 1852.3  | 1856.1 | 1854.6 | 1854.5  | 1856.9 |
| gdb 1804 | 1869.7 <sup>a</sup> | 1854.1 | 1854.1  | 1856.9 | 1855.7 | 1855.7  | 1856.9 |
| gdb 1805 | 1856.3 <sup>a</sup> | 1847.8 | 1847.8  | 1848.5 | 1845.9 | 1845.9  | 1845.8 |
| gdb 1806 | 1837.4 <sup>a</sup> | 1818.0 | 1818.0  | 1819.8 | 1813.0 | 1813.0  | 1813.2 |
| gdb 1807 | 1833.3 <sup>a</sup> | 1815.8 | 1815.8  | 1817.2 | 1811.5 | 1811.5  | 1812.2 |
| gdb 1808 | 1850.6 <sup>a</sup> | 1825.2 | 1825.2  | 1830.4 | 1824.5 | 1824.5  | 1827.5 |
| gdb 1809 | 1845.1 <sup>a</sup> | 1821.9 | 1821.9  | 1826.8 | 1821.5 | 1821.5  | 1824.9 |
| gdb 1810 | 1831.7 <sup>a</sup> | 1815.0 | 1814.9  | 1813.2 | 1808.4 | 1808.3  | 1804.7 |
| gdb 1811 | 1843.1 <sup>a</sup> | 1820.5 | 1820.5  | 1822.0 | 1817.9 | 1817.8  | 1816.8 |
| gdb 1812 | 1878.5 <sup>a</sup> | 1854.5 | 1854.4  | 1857.6 | 1853.4 | 1853.4  | 1858.0 |
| gdb 1813 | 1853.7 <sup>a</sup> | 1842.6 | 1842.5  | 1843.1 | 1842.9 | 1842.9  | 1842.9 |
| gdb 1814 | 1868.6 <sup>a</sup> | 1850.0 | 1849.9  | 1854.5 | 1853.5 | 1853.5  | 1856.3 |
| gdb 1815 | 1915.0 <sup>a</sup> | 1914.4 | 1914.4  | 1915.8 | 1910.7 | 1910.7  | 1914.1 |
| gdb 1816 | 1913.3 <sup>a</sup> | 1911.7 | 1911.7  | 1913.9 | 1908.0 | 1908.0  | 1912.0 |
| gdb 1817 | 1904.7 <sup>a</sup> | 1906.2 | 1906.2  | 1907.6 | 1904.0 | 1904.0  | 1905.4 |

... continued on next page ...



Table S73: ... continued from previous page ...

| Species  | Ref.                | OM2    | OM2-D3T | ODM2   | OM3    | OM3-D3T | ODM3   |
|----------|---------------------|--------|---------|--------|--------|---------|--------|
| gdb 1818 | 1907.3 <sup>a</sup> | 1913.0 | 1913.0  | 1915.5 | 1913.7 | 1913.7  | 1915.4 |
| gdb 1819 | 1875.0 <sup>a</sup> | 1867.8 | 1867.7  | 1866.6 | 1859.4 | 1859.4  | 1857.8 |
| gdb 1820 | 1881.0 <sup>a</sup> | 1877.8 | 1877.8  | 1878.2 | 1872.5 | 1872.5  | 1870.9 |
| gdb 1821 | 1871.1 <sup>a</sup> | 1871.4 | 1871.4  | 1875.7 | 1869.3 | 1869.2  | 1872.2 |
| gdb 1822 | 1867.2 <sup>a</sup> | 1857.4 | 1857.4  | 1855.9 | 1849.1 | 1849.1  | 1846.4 |
| gdb 1823 | 1875.3 <sup>a</sup> | 1863.6 | 1863.6  | 1864.5 | 1859.0 | 1859.0  | 1857.5 |
| gdb 1824 | 1866.5 <sup>a</sup> | 1858.2 | 1858.2  | 1862.4 | 1857.3 | 1857.2  | 1859.0 |
| gdb 1825 | 1884.2 <sup>a</sup> | 1883.2 | 1883.2  | 1886.3 | 1881.3 | 1881.2  | 1884.4 |
| gdb 1826 | 1889.2 <sup>a</sup> | 1886.6 | 1886.6  | 1888.0 | 1883.9 | 1883.9  | 1885.3 |
| gdb 1827 | 1895.7 <sup>a</sup> | 1891.2 | 1891.2  | 1895.0 | 1892.1 | 1892.1  | 1894.8 |
| gdb 1828 | 1912.4 <sup>a</sup> | 1909.1 | 1909.1  | 1911.0 | 1904.7 | 1904.7  | 1908.2 |
| gdb 1829 | 1894.6 <sup>a</sup> | 1900.3 | 1900.3  | 1903.5 | 1897.6 | 1897.6  | 1900.9 |
| gdb 1830 | 1901.2 <sup>a</sup> | 1902.2 | 1902.2  | 1903.5 | 1899.4 | 1899.4  | 1900.3 |
| gdb 1831 | 1908.9 <sup>a</sup> | 1909.3 | 1909.3  | 1911.8 | 1910.0 | 1910.0  | 1910.7 |
| gdb 1832 | 1877.8 <sup>a</sup> | 1883.3 | 1883.3  | 1887.9 | 1880.0 | 1880.0  | 1883.9 |
| gdb 1833 | 1877.1 <sup>a</sup> | 1874.9 | 1874.8  | 1879.2 | 1874.1 | 1874.1  | 1875.7 |
| gdb 1834 | 1872.5 <sup>a</sup> | 1873.2 | 1873.2  | 1874.3 | 1868.4 | 1868.3  | 1868.0 |
| gdb 1835 | 1861.5 <sup>a</sup> | 1854.0 | 1854.0  | 1853.5 | 1846.7 | 1846.7  | 1845.2 |
| gdb 1836 | 1861.0 <sup>a</sup> | 1851.3 | 1851.3  | 1851.1 | 1843.7 | 1843.7  | 1842.7 |
| gdb 1837 | 1866.9 <sup>a</sup> | 1857.3 | 1857.3  | 1855.2 | 1848.4 | 1848.4  | 1844.5 |
| gdb 1838 | 1868.7 <sup>a</sup> | 1858.3 | 1858.3  | 1858.9 | 1854.1 | 1854.1  | 1852.4 |
| gdb 1839 | 1864.1 <sup>a</sup> | 1858.7 | 1858.7  | 1862.3 | 1856.5 | 1856.5  | 1858.1 |
| gdb 1840 | 1885.2 <sup>a</sup> | 1882.7 | 1882.7  | 1885.0 | 1881.3 | 1881.3  | 1884.2 |
| gdb 1841 | 1883.1 <sup>a</sup> | 1881.0 | 1881.0  | 1883.8 | 1879.4 | 1879.3  | 1882.6 |
| gdb 1842 | 1889.0 <sup>a</sup> | 1886.2 | 1886.2  | 1887.2 | 1883.4 | 1883.3  | 1884.5 |
| gdb 1843 | 1893.8 <sup>a</sup> | 1889.7 | 1889.7  | 1893.0 | 1891.0 | 1891.0  | 1893.4 |
| gdb 1844 | 1880.4 <sup>a</sup> | 1854.5 | 1854.5  | 1857.7 | 1853.1 | 1853.1  | 1857.7 |
| gdb 1845 | 1859.6 <sup>a</sup> | 1847.3 | 1847.3  | 1847.9 | 1847.0 | 1847.0  | 1846.6 |
| gdb 1846 | 1868.4 <sup>a</sup> | 1850.4 | 1850.3  | 1854.1 | 1854.2 | 1854.1  | 1856.7 |
| gdb 1847 | 1891.4 <sup>a</sup> | 1897.3 | 1897.3  | 1899.3 | 1895.4 | 1895.4  | 1897.5 |
| gdb 1848 | 1893.6 <sup>a</sup> | 1896.3 | 1896.3  | 1899.4 | 1894.2 | 1894.2  | 1897.6 |
| gdb 1849 | 1889.3 <sup>a</sup> | 1894.4 | 1894.4  | 1897.2 | 1892.5 | 1892.5  | 1895.2 |
| gdb 1850 | 1897.6 <sup>a</sup> | 1898.6 | 1898.6  | 1899.8 | 1896.4 | 1896.4  | 1896.9 |
| gdb 1851 | 1903.1 <sup>a</sup> | 1903.9 | 1903.9  | 1906.1 | 1905.5 | 1905.5  | 1906.2 |
| gdb 1852 | 1894.2 <sup>a</sup> | 1898.8 | 1898.8  | 1901.3 | 1888.7 | 1888.7  | 1894.3 |
| gdb 1853 | 1898.0 <sup>a</sup> | 1903.3 | 1903.3  | 1905.4 | 1893.0 | 1893.0  | 1897.7 |
| gdb 1854 | 1891.9 <sup>a</sup> | 1895.8 | 1895.8  | 1898.7 | 1888.5 | 1888.5  | 1892.5 |
| gdb 1855 | 1899.1 <sup>a</sup> | 1905.0 | 1905.0  | 1906.6 | 1895.2 | 1895.2  | 1899.5 |
| gdb 1856 | 1896.7 <sup>a</sup> | 1899.2 | 1899.2  | 1902.9 | 1895.1 | 1895.1  | 1899.0 |
| gdb 1857 | 1898.3 <sup>a</sup> | 1901.3 | 1901.3  | 1905.2 | 1897.3 | 1897.3  | 1901.0 |
| gdb 1858 | 1896.9 <sup>a</sup> | 1898.9 | 1898.9  | 1900.4 | 1898.8 | 1898.8  | 1900.5 |
| gdb 1859 | 1915.5 <sup>a</sup> | 1909.4 | 1909.4  | 1910.0 | 1907.1 | 1907.0  | 1909.2 |
| gdb 1860 | 1906.0 <sup>a</sup> | 1905.0 | 1905.0  | 1906.1 | 1908.6 | 1908.6  | 1908.4 |
| gdb 1861 | 1905.7 <sup>a</sup> | 1906.4 | 1906.4  | 1907.7 | 1909.8 | 1909.8  | 1909.9 |
| gdb 1862 | 1906.1 <sup>a</sup> | 1904.4 | 1904.3  | 1902.1 | 1900.9 | 1900.9  | 1897.6 |
| gdb 1863 | 1877.8 <sup>a</sup> | 1872.9 | 1872.9  | 1871.3 | 1869.7 | 1869.7  | 1867.8 |
| gdb 1864 | 1869.8 <sup>a</sup> | 1860.1 | 1860.1  | 1861.4 | 1861.3 | 1861.2  | 1862.8 |
| gdb 1865 | 1877.0 <sup>a</sup> | 1872.6 | 1872.6  | 1874.6 | 1876.1 | 1876.1  | 1877.6 |
| gdb 1866 | 1876.8 <sup>a</sup> | 1871.8 | 1871.7  | 1874.0 | 1875.3 | 1875.2  | 1876.9 |
| gdb 1867 | 1850.3 <sup>a</sup> | 1834.2 | 1834.2  | 1836.5 | 1836.7 | 1836.7  | 1836.7 |
| gdb 1868 | 1856.9 <sup>a</sup> | 1845.1 | 1845.1  | 1844.2 | 1842.8 | 1842.7  | 1839.6 |
| gdb 1869 | 1856.5 <sup>a</sup> | 1844.3 | 1844.3  | 1843.6 | 1842.0 | 1842.0  | 1839.4 |
| gdb 1870 | 1856.1 <sup>a</sup> | 1843.8 | 1843.8  | 1839.7 | 1835.0 | 1835.0  | 1829.0 |
| gdb 1871 | 1856.4 <sup>a</sup> | 1849.0 | 1849.0  | 1852.0 | 1853.2 | 1853.1  | 1853.0 |
| gdb 1872 | 1866.6 <sup>a</sup> | 1865.7 | 1865.7  | 1868.1 | 1866.2 | 1866.2  | 1867.4 |
| gdb 1873 | 1875.0 <sup>a</sup> | 1871.3 | 1871.2  | 1870.2 | 1868.2 | 1868.2  | 1865.6 |
| gdb 1874 | 1876.2 <sup>a</sup> | 1872.2 | 1872.2  | 1871.2 | 1869.1 | 1869.1  | 1866.7 |
| gdb 1875 | 1880.9 <sup>a</sup> | 1870.1 | 1870.1  | 1865.8 | 1860.5 | 1860.5  | 1855.2 |
| gdb 1876 | 1874.0 <sup>a</sup> | 1874.8 | 1874.8  | 1877.1 | 1878.3 | 1878.3  | 1878.1 |
| gdb 1877 | 1859.8 <sup>a</sup> | 1851.1 | 1851.1  | 1852.6 | 1849.7 | 1849.7  | 1850.0 |
| gdb 1878 | 1858.7 <sup>a</sup> | 1846.9 | 1846.9  | 1845.6 | 1838.8 | 1838.8  | 1836.5 |
| gdb 1879 | 1864.7 <sup>a</sup> | 1852.9 | 1852.9  | 1857.1 | 1856.8 | 1856.7  | 1858.5 |
| gdb 1880 | 1850.0 <sup>a</sup> | 1839.9 | 1839.9  | 1843.0 | 1839.7 | 1839.7  | 1841.6 |
| gdb 1881 | 1859.5 <sup>a</sup> | 1843.1 | 1843.1  | 1846.4 | 1842.9 | 1842.9  | 1845.2 |
| gdb 1882 | 1850.2 <sup>a</sup> | 1838.7 | 1838.7  | 1838.3 | 1831.6 | 1831.6  | 1830.5 |

... continued on next page ...

Table S73: ... continued from previous page ...

| Species  | Ref.                | OM2    | OM2-D3T | ODM2   | OM3    | OM3-D3T | ODM3   |
|----------|---------------------|--------|---------|--------|--------|---------|--------|
| gdb 1883 | 1851.3 <sup>a</sup> | 1848.0 | 1848.0  | 1852.0 | 1850.9 | 1850.8  | 1852.0 |
| gdb 1884 | 1878.8 <sup>a</sup> | 1876.9 | 1876.9  | 1876.9 | 1879.5 | 1876.2  | 1878.9 |
| gdb 1885 | 1887.4 <sup>a</sup> | 1884.2 | 1884.2  | 1886.9 | 1887.4 | 1887.4  | 1888.1 |
| gdb 1886 | 1907.6 <sup>a</sup> | 1907.9 | 1907.9  | 1905.9 | 1905.2 | 1905.2  | 1903.0 |
| gdb 1887 | 1914.6 <sup>a</sup> | 1909.6 | 1909.6  | 1910.0 | 1908.5 | 1908.5  | 1910.8 |
| gdb 1888 | 1904.1 <sup>a</sup> | 1908.0 | 1908.0  | 1909.3 | 1911.7 | 1911.6  | 1912.3 |
| gdb 1889 | 1890.6 <sup>a</sup> | 1886.8 | 1886.8  | 1889.3 | 1890.2 | 1890.2  | 1890.8 |
| gdb 1890 | 1846.1 <sup>a</sup> | 1829.7 | 1829.7  | 1828.2 | 1824.7 | 1824.7  | 1822.8 |
| gdb 1891 | 1844.9 <sup>a</sup> | 1828.7 | 1828.6  | 1827.3 | 1823.8 | 1823.7  | 1821.8 |
| gdb 1892 | 1852.3 <sup>a</sup> | 1841.7 | 1841.7  | 1837.7 | 1832.5 | 1832.4  | 1826.8 |
| gdb 1893 | 1852.6 <sup>a</sup> | 1842.3 | 1842.3  | 1841.6 | 1840.0 | 1840.0  | 1837.4 |
| gdb 1894 | 1847.5 <sup>a</sup> | 1833.7 | 1833.7  | 1836.2 | 1834.7 | 1834.6  | 1835.1 |
| gdb 1895 | 1885.7 <sup>a</sup> | 1872.7 | 1872.7  | 1874.3 | 1872.1 | 1872.1  | 1875.6 |
| gdb 1896 | 1867.4 <sup>a</sup> | 1857.1 | 1857.1  | 1858.3 | 1859.1 | 1859.0  | 1861.1 |
| gdb 1897 | 1866.9 <sup>a</sup> | 1857.4 | 1857.4  | 1858.6 | 1859.3 | 1859.3  | 1861.2 |
| gdb 1898 | 1875.2 <sup>a</sup> | 1870.3 | 1870.3  | 1868.9 | 1867.9 | 1867.9  | 1866.0 |
| gdb 1899 | 1874.3 <sup>a</sup> | 1870.6 | 1870.3  | 1872.4 | 1875.1 | 1875.0  | 1876.4 |
| gdb 1900 | 1892.4 <sup>a</sup> | 1893.7 | 1893.7  | 1895.0 | 1893.1 | 1893.1  | 1895.1 |
| gdb 1901 | 1892.7 <sup>a</sup> | 1894.2 | 1894.2  | 1895.5 | 1892.7 | 1892.7  | 1894.9 |
| gdb 1902 | 1890.8 <sup>a</sup> | 1894.0 | 1894.0  | 1895.3 | 1893.3 | 1893.3  | 1894.9 |
| gdb 1903 | 1899.5 <sup>a</sup> | 1896.8 | 1896.8  | 1894.7 | 1893.3 | 1893.3  | 1890.5 |
| gdb 1904 | 1901.3 <sup>a</sup> | 1901.0 | 1901.0  | 1902.8 | 1903.2 | 1903.1  | 1903.7 |
| gdb 1905 | 1885.4 <sup>a</sup> | 1881.0 | 1881.0  | 1883.3 | 1883.4 | 1883.4  | 1883.9 |
| gdb 1906 | 1888.4 <sup>a</sup> | 1886.0 | 1886.0  | 1887.6 | 1887.2 | 1887.2  | 1886.9 |
| gdb 1907 | 1880.2 <sup>a</sup> | 1876.9 | 1876.9  | 1875.5 | 1873.0 | 1873.0  | 1870.3 |
| gdb 1908 | 1895.9 <sup>a</sup> | 1899.8 | 1899.8  | 1901.1 | 1899.2 | 1899.2  | 1901.0 |
| gdb 1909 | 1896.0 <sup>a</sup> | 1899.8 | 1899.8  | 1901.1 | 1898.0 | 1897.9  | 1899.6 |
| gdb 1910 | 1911.1 <sup>a</sup> | 1906.1 | 1906.0  | 1906.3 | 1903.5 | 1903.4  | 1905.6 |
| gdb 1911 | 1902.2 <sup>a</sup> | 1903.1 | 1903.1  | 1900.8 | 1899.2 | 1899.2  | 1896.0 |
| gdb 1912 | 1903.9 <sup>a</sup> | 1906.1 | 1906.1  | 1907.1 | 1909.2 | 1909.2  | 1909.0 |
| gdb 1913 | 1883.8 <sup>a</sup> | 1880.1 | 1880.1  | 1882.0 | 1882.8 | 1882.7  | 1882.7 |
| gdb 1914 | 1887.0 <sup>a</sup> | 1884.8 | 1884.8  | 1886.0 | 1886.0 | 1886.0  | 1885.4 |
| gdb 1915 | 1880.4 <sup>a</sup> | 1877.2 | 1877.2  | 1875.5 | 1873.2 | 1873.2  | 1870.1 |
| gdb 1916 | 1887.8 <sup>a</sup> | 1887.3 | 1887.3  | 1889.9 | 1887.6 | 1887.6  | 1888.4 |
| gdb 1917 | 1887.4 <sup>a</sup> | 1885.3 | 1885.3  | 1884.5 | 1878.9 | 1878.9  | 1876.8 |
| gdb 1918 | 1876.3 <sup>a</sup> | 1873.3 | 1873.3  | 1875.5 | 1876.0 | 1876.0  | 1877.3 |
| gdb 1919 | 1874.9 <sup>a</sup> | 1872.1 | 1872.1  | 1870.6 | 1868.0 | 1868.0  | 1866.1 |
| gdb 1920 | 1872.6 <sup>a</sup> | 1864.1 | 1864.1  | 1865.7 | 1864.1 | 1864.1  | 1865.4 |
| gdb 1921 | 1879.3 <sup>a</sup> | 1877.6 | 1877.6  | 1879.0 | 1878.5 | 1878.5  | 1878.6 |
| gdb 1922 | 1850.1 <sup>a</sup> | 1840.7 | 1840.6  | 1836.6 | 1831.7 | 1831.6  | 1826.0 |
| gdb 1923 | 1846.5 <sup>a</sup> | 1831.0 | 1831.0  | 1830.2 | 1826.0 | 1826.0  | 1824.1 |
| gdb 1924 | 1851.3 <sup>a</sup> | 1842.2 | 1842.2  | 1842.0 | 1840.1 | 1840.1  | 1837.7 |
| gdb 1925 | 1887.8 <sup>a</sup> | 1891.0 | 1891.0  | 1892.5 | 1891.0 | 1891.0  | 1893.3 |
| gdb 1926 | 1889.5 <sup>a</sup> | 1895.2 | 1895.2  | 1896.9 | 1893.8 | 1893.8  | 1895.8 |
| gdb 1927 | 1896.8 <sup>a</sup> | 1895.8 | 1895.8  | 1893.8 | 1892.6 | 1892.5  | 1890.4 |
| gdb 1928 | 1894.5 <sup>a</sup> | 1896.8 | 1896.8  | 1898.5 | 1900.5 | 1900.5  | 1901.2 |
| gdb 1929 | 1871.8 <sup>a</sup> | 1868.3 | 1868.3  | 1867.0 | 1865.9 | 1865.8  | 1864.2 |
| gdb 1930 | 1887.0 <sup>a</sup> | 1877.1 | 1877.0  | 1878.1 | 1875.1 | 1875.0  | 1878.3 |
| gdb 1931 | 1869.0 <sup>a</sup> | 1859.8 | 1859.8  | 1861.7 | 1861.6 | 1861.6  | 1863.7 |
| gdb 1932 | 1872.2 <sup>a</sup> | 1869.0 | 1869.0  | 1871.3 | 1873.8 | 1873.8  | 1875.2 |
| gdb 1933 | 1866.2 <sup>a</sup> | 1865.4 | 1865.4  | 1867.8 | 1866.0 | 1866.0  | 1867.3 |
| gdb 1934 | 1877.2 <sup>a</sup> | 1873.5 | 1873.5  | 1872.5 | 1870.5 | 1870.5  | 1867.6 |
| gdb 1935 | 1881.0 <sup>a</sup> | 1870.2 | 1870.2  | 1865.8 | 1860.9 | 1860.8  | 1855.4 |
| gdb 1936 | 1881.4 <sup>a</sup> | 1873.4 | 1873.4  | 1872.5 | 1870.8 | 1870.8  | 1868.3 |
| gdb 1937 | 1873.9 <sup>a</sup> | 1874.2 | 1874.2  | 1876.6 | 1877.8 | 1877.8  | 1877.8 |
| gdb 1938 | 1843.1 <sup>a</sup> | 1833.6 | 1833.6  | 1832.5 | 1831.4 | 1831.4  | 1828.0 |
| gdb 1939 | 1842.8 <sup>a</sup> | 1834.1 | 1834.1  | 1836.4 | 1839.0 | 1838.9  | 1838.4 |
| gdb 1940 | 1841.9 <sup>a</sup> | 1833.3 | 1833.3  | 1835.8 | 1837.8 | 1837.8  | 1837.7 |
| gdb 1941 | 1842.8 <sup>a</sup> | 1833.3 | 1833.3  | 1832.3 | 1831.1 | 1831.1  | 1827.8 |
| gdb 1942 | 1841.1 <sup>a</sup> | 1833.8 | 1833.8  | 1836.2 | 1838.4 | 1838.4  | 1838.1 |
| gdb 1943 | 1846.0 <sup>a</sup> | 1835.8 | 1835.8  | 1834.9 | 1833.8 | 1833.7  | 1830.2 |
| gdb 1944 | 1840.2 <sup>a</sup> | 1828.6 | 1828.6  | 1823.8 | 1820.0 | 1820.0  | 1813.7 |
| gdb 1945 | 1863.0 <sup>a</sup> | 1855.2 | 1855.2  | 1856.6 | 1853.7 | 1853.6  | 1853.5 |
| gdb 1946 | 1859.8 <sup>a</sup> | 1849.3 | 1849.2  | 1847.5 | 1840.9 | 1840.9  | 1838.1 |
| gdb 1947 | 1868.4 <sup>a</sup> | 1856.9 | 1856.9  | 1857.6 | 1852.7 | 1852.7  | 1851.3 |

... continued on next page ...

Table S73: ... continued from previous page ...

| Species  | Ref.                | OM2    | OM2-D3T | ODM2   | OM3    | OM3-D3T | ODM3   |
|----------|---------------------|--------|---------|--------|--------|---------|--------|
| gdb 1948 | 1868.3 <sup>a</sup> | 1857.5 | 1857.5  | 1861.4 | 1860.0 | 1860.0  | 1861.4 |
| gdb 1949 | 1851.9 <sup>a</sup> | 1845.4 | 1845.4  | 1845.4 | 1848.4 | 1842.9  | 1844.2 |
| gdb 1950 | 1850.8 <sup>a</sup> | 1843.0 | 1843.0  | 1846.1 | 1841.9 | 1841.9  | 1843.5 |
| gdb 1951 | 1848.0 <sup>a</sup> | 1839.5 | 1839.4  | 1838.9 | 1831.7 | 1831.6  | 1830.4 |
| gdb 1952 | 1850.8 <sup>a</sup> | 1840.8 | 1840.8  | 1840.4 | 1833.2 | 1833.2  | 1831.9 |
| gdb 1953 | 1855.3 <sup>a</sup> | 1853.0 | 1853.0  | 1853.5 | 1847.6 | 1847.6  | 1845.5 |
| gdb 1954 | 1853.1 <sup>a</sup> | 1844.1 | 1844.1  | 1847.4 | 1843.6 | 1843.6  | 1845.3 |
| gdb 1955 | 1855.6 <sup>a</sup> | 1855.4 | 1855.4  | 1859.4 | 1857.0 | 1857.0  | 1857.7 |
| gdb 1956 | 1867.0 <sup>a</sup> | 1864.2 | 1864.2  | 1862.9 | 1858.0 | 1858.0  | 1856.4 |
| gdb 1957 | 1876.6 <sup>a</sup> | 1868.6 | 1868.6  | 1863.9 | 1859.5 | 1859.5  | 1853.3 |
| gdb 1958 | 1869.6 <sup>a</sup> | 1863.9 | 1863.9  | 1862.8 | 1858.2 | 1858.2  | 1856.3 |
| gdb 1959 | 1870.1 <sup>a</sup> | 1867.6 | 1867.6  | 1870.1 | 1868.4 | 1868.4  | 1869.4 |
| gdb 1960 | 1875.6 <sup>a</sup> | 1871.4 | 1871.4  | 1870.3 | 1869.1 | 1869.1  | 1865.9 |
| gdb 1961 | 1848.7 <sup>a</sup> | 1833.0 | 1833.0  | 1835.8 | 1830.1 | 1830.1  | 1832.6 |
| gdb 1962 | 1853.3 <sup>a</sup> | 1842.6 | 1842.6  | 1842.3 | 1835.6 | 1835.6  | 1834.6 |
| gdb 1963 | 1849.7 <sup>a</sup> | 1840.5 | 1840.5  | 1840.0 | 1833.7 | 1833.7  | 1832.9 |
| gdb 1964 | 1855.8 <sup>a</sup> | 1846.6 | 1846.6  | 1850.2 | 1846.4 | 1846.3  | 1848.3 |
| gdb 1965 | 1851.1 <sup>a</sup> | 1843.1 | 1843.1  | 1846.3 | 1843.1 | 1843.0  | 1845.3 |
| gdb 1966 | 1873.6 <sup>a</sup> | 1865.4 | 1865.4  | 1864.5 | 1857.3 | 1857.3  | 1856.2 |
| gdb 1967 | 1876.6 <sup>a</sup> | 1872.3 | 1872.3  | 1875.1 | 1870.7 | 1870.7  | 1872.3 |
| gdb 1968 | 1880.7 <sup>a</sup> | 1870.1 | 1870.1  | 1865.8 | 1860.8 | 1860.8  | 1855.5 |
| gdb 1969 | 1878.2 <sup>a</sup> | 1874.1 | 1874.1  | 1873.2 | 1871.4 | 1871.4  | 1868.8 |
| gdb 1970 | 1874.4 <sup>a</sup> | 1874.1 | 1874.1  | 1876.3 | 1877.7 | 1877.7  | 1877.8 |
| gdb 1971 | 1868.4 <sup>a</sup> | 1863.0 | 1863.0  | 1861.7 | 1857.1 | 1857.1  | 1856.1 |
| gdb 1972 | 1879.6 <sup>a</sup> | 1870.0 | 1870.0  | 1865.6 | 1861.0 | 1861.0  | 1855.5 |
| gdb 1973 | 1869.0 <sup>a</sup> | 1861.4 | 1861.4  | 1861.1 | 1854.9 | 1854.9  | 1854.3 |
| gdb 1974 | 1869.7 <sup>a</sup> | 1865.5 | 1865.5  | 1868.6 | 1865.4 | 1865.4  | 1867.3 |
| gdb 1975 | 1880.5 <sup>a</sup> | 1872.4 | 1872.3  | 1871.2 | 1870.0 | 1870.0  | 1867.2 |
| gdb 1976 | 1863.1 <sup>a</sup> | 1855.2 | 1855.2  | 1856.7 | 1853.6 | 1853.6  | 1853.4 |
| gdb 1977 | 1859.9 <sup>a</sup> | 1849.3 | 1849.3  | 1847.7 | 1840.9 | 1840.9  | 1838.2 |
| gdb 1978 | 1868.9 <sup>a</sup> | 1855.8 | 1855.8  | 1856.8 | 1851.5 | 1851.5  | 1850.3 |
| gdb 1979 | 1869.1 <sup>a</sup> | 1856.9 | 1856.9  | 1861.0 | 1859.5 | 1859.5  | 1860.7 |
| gdb 1980 | 1869.8 <sup>a</sup> | 1866.6 | 1866.6  | 1870.0 | 1862.4 | 1862.4  | 1866.0 |
| gdb 1981 | 1874.4 <sup>a</sup> | 1867.7 | 1867.7  | 1867.0 | 1860.6 | 1860.6  | 1859.6 |
| gdb 1982 | 1877.6 <sup>a</sup> | 1870.3 | 1870.3  | 1869.7 | 1863.4 | 1863.4  | 1862.7 |
| gdb 1983 | 1874.9 <sup>a</sup> | 1872.3 | 1872.3  | 1875.4 | 1871.9 | 1871.9  | 1874.1 |
| gdb 1984 | 1874.7 <sup>a</sup> | 1871.9 | 1871.9  | 1874.9 | 1871.3 | 1871.3  | 1873.4 |
| gdb 1985 | 1861.4 <sup>a</sup> | 1848.9 | 1848.8  | 1852.2 | 1846.6 | 1846.6  | 1848.5 |
| gdb 1986 | 1850.8 <sup>a</sup> | 1842.6 | 1842.6  | 1845.8 | 1841.8 | 1841.8  | 1843.5 |
| gdb 1987 | 1854.8 <sup>a</sup> | 1853.4 | 1853.4  | 1853.8 | 1847.9 | 1847.9  | 1845.6 |
| gdb 1988 | 1850.8 <sup>a</sup> | 1841.5 | 1841.4  | 1841.1 | 1833.6 | 1833.6  | 1832.3 |
| gdb 1989 | 1847.9 <sup>a</sup> | 1839.0 | 1839.0  | 1838.6 | 1831.2 | 1831.2  | 1830.1 |
| gdb 1990 | 1853.3 <sup>a</sup> | 1844.1 | 1844.1  | 1847.2 | 1842.8 | 1842.8  | 1844.3 |
| gdb 1991 | 1856.6 <sup>a</sup> | 1856.2 | 1856.2  | 1859.9 | 1857.6 | 1857.6  | 1857.8 |
| gdb 1992 | 1887.3 <sup>a</sup> | 1888.7 | 1888.7  | 1890.2 | 1879.2 | 1879.1  | 1881.6 |
| gdb 1993 | 1886.6 <sup>a</sup> | 1888.3 | 1888.3  | 1889.7 | 1878.6 | 1878.6  | 1881.0 |
| gdb 1994 | 1885.0 <sup>a</sup> | 1879.6 | 1879.6  | 1879.4 | 1871.3 | 1871.3  | 1870.8 |
| gdb 1995 | 1886.6 <sup>a</sup> | 1881.2 | 1881.2  | 1880.2 | 1872.2 | 1872.2  | 1870.3 |
| gdb 1996 | 1879.8 <sup>a</sup> | 1877.6 | 1877.6  | 1877.3 | 1869.3 | 1869.3  | 1868.7 |
| gdb 1997 | 1881.5 <sup>a</sup> | 1880.7 | 1880.7  | 1883.8 | 1879.3 | 1879.3  | 1881.5 |
| gdb 1998 | 1889.9 <sup>a</sup> | 1887.4 | 1887.4  | 1890.0 | 1885.4 | 1885.4  | 1886.1 |
| gdb 1999 | 1882.0 <sup>a</sup> | 1880.8 | 1880.8  | 1883.8 | 1879.2 | 1879.2  | 1881.1 |
| gdb 2000 | 1873.4 <sup>a</sup> | 1872.2 | 1872.1  | 1875.3 | 1864.0 | 1864.0  | 1868.0 |
| gdb 2001 | 1872.6 <sup>a</sup> | 1868.0 | 1868.0  | 1868.3 | 1860.9 | 1860.8  | 1860.0 |
| gdb 2002 | 1866.3 <sup>a</sup> | 1863.1 | 1863.1  | 1862.7 | 1856.4 | 1856.4  | 1855.5 |
| gdb 2003 | 1869.1 <sup>a</sup> | 1865.9 | 1865.9  | 1865.9 | 1858.8 | 1858.8  | 1857.8 |
| gdb 2004 | 1875.9 <sup>a</sup> | 1870.6 | 1870.6  | 1874.6 | 1870.3 | 1870.3  | 1872.4 |
| gdb 2005 | 1873.0 <sup>a</sup> | 1867.2 | 1867.2  | 1870.8 | 1867.3 | 1867.3  | 1869.8 |
| gdb 2006 | 1875.3 <sup>a</sup> | 1870.4 | 1870.4  | 1874.4 | 1870.2 | 1870.1  | 1872.4 |
| gdb 2007 | 1887.1 <sup>a</sup> | 1887.4 | 1887.4  | 1890.1 | 1887.3 | 1887.3  | 1888.0 |
| gdb 2008 | 1889.4 <sup>a</sup> | 1887.1 | 1887.1  | 1886.0 | 1880.3 | 1880.2  | 1877.6 |
| gdb 2009 | 1872.9 <sup>a</sup> | 1867.5 | 1867.5  | 1866.6 | 1860.4 | 1860.4  | 1860.2 |
| gdb 2010 | 1876.1 <sup>a</sup> | 1872.7 | 1872.7  | 1875.2 | 1872.2 | 1872.2  | 1874.1 |
| gdb 2011 | 1893.6 <sup>a</sup> | 1897.2 | 1897.2  | 1898.3 | 1897.4 | 1897.4  | 1899.2 |
| gdb 2012 | 1909.8 <sup>a</sup> | 1906.4 | 1906.4  | 1906.8 | 1903.7 | 1903.7  | 1906.2 |

... continued on next page ...

Table S73: ... continued from previous page ...

| Species  | Ref.                | OM2    | OM2-D3T | ODM2   | OM3    | OM3-D3T | ODM3   |
|----------|---------------------|--------|---------|--------|--------|---------|--------|
| gdb 2013 | 1907.3 <sup>a</sup> | 1902.6 | 1902.6  | 1903.2 | 1900.9 | 1900.9  | 1903.4 |
| gdb 2014 | 1902.6 <sup>a</sup> | 1903.4 | 1903.4  | 1901.1 | 1900.8 | 1900.8  | 1898.1 |
| gdb 2015 | 1899.9 <sup>a</sup> | 1904.7 | 1904.6  | 1905.8 | 1908.3 | 1908.3  | 1908.3 |
| gdb 2016 | 1896.9 <sup>a</sup> | 1895.1 | 1895.1  | 1893.2 | 1892.8 | 1892.7  | 1890.9 |
| gdb 2017 | 1888.2 <sup>a</sup> | 1893.7 | 1893.7  | 1895.3 | 1893.4 | 1893.3  | 1895.1 |
| gdb 2018 | 1885.9 <sup>a</sup> | 1892.0 | 1892.0  | 1893.8 | 1891.5 | 1891.4  | 1893.4 |
| gdb 2019 | 1895.4 <sup>a</sup> | 1896.9 | 1896.9  | 1898.5 | 1900.6 | 1900.6  | 1901.4 |
| gdb 2020 | 1876.5 <sup>a</sup> | 1870.7 | 1870.7  | 1866.0 | 1861.8 | 1861.8  | 1856.2 |
| gdb 2021 | 1876.5 <sup>a</sup> | 1873.6 | 1873.6  | 1872.6 | 1871.1 | 1871.1  | 1868.3 |
| gdb 2022 | 1867.7 <sup>a</sup> | 1866.7 | 1866.7  | 1869.5 | 1868.2 | 1868.2  | 1869.4 |
| gdb 2023 | 1858.5 <sup>a</sup> | 1857.0 | 1857.0  | 1858.7 | 1855.3 | 1855.3  | 1858.5 |
| gdb 2024 | 1877.3 <sup>a</sup> | 1869.1 | 1869.1  | 1864.5 | 1861.0 | 1861.0  | 1855.6 |
| gdb 2025 | 1877.3 <sup>a</sup> | 1871.6 | 1871.6  | 1870.5 | 1870.1 | 1870.1  | 1867.4 |
| gdb 2026 | 1862.4 <sup>a</sup> | 1865.6 | 1865.6  | 1867.5 | 1867.3 | 1867.3  | 1868.9 |
| gdb 2027 | 1863.8 <sup>a</sup> | 1863.9 | 1863.9  | 1866.6 | 1864.0 | 1864.0  | 1865.3 |
| gdb 2028 | 1882.1 <sup>a</sup> | 1872.9 | 1872.9  | 1872.0 | 1870.4 | 1870.4  | 1867.4 |
| gdb 2029 | 1881.7 <sup>a</sup> | 1870.2 | 1870.2  | 1866.0 | 1860.8 | 1860.8  | 1855.3 |
| gdb 2030 | 1874.4 <sup>a</sup> | 1874.5 | 1874.4  | 1876.8 | 1878.3 | 1878.3  | 1877.7 |
| gdb 2031 | 1874.3 <sup>a</sup> | 1865.7 | 1865.7  | 1864.9 | 1857.6 | 1857.6  | 1856.4 |
| gdb 2032 | 1876.7 <sup>a</sup> | 1870.9 | 1870.9  | 1873.6 | 1869.2 | 1869.2  | 1870.4 |
| gdb 2033 | 1866.1 <sup>a</sup> | 1866.1 | 1866.1  | 1870.6 | 1865.3 | 1865.2  | 1868.5 |
| gdb 2034 | 1868.0 <sup>a</sup> | 1864.8 | 1864.8  | 1868.5 | 1860.3 | 1860.3  | 1864.0 |
| gdb 2035 | 1876.9 <sup>a</sup> | 1869.3 | 1869.3  | 1868.8 | 1862.0 | 1862.0  | 1861.0 |
| gdb 2036 | 1877.4 <sup>a</sup> | 1869.9 | 1869.9  | 1869.4 | 1862.9 | 1862.9  | 1862.1 |
| gdb 2037 | 1876.4 <sup>a</sup> | 1871.3 | 1871.3  | 1874.3 | 1871.0 | 1871.0  | 1872.7 |
| gdb 2038 | 1875.3 <sup>a</sup> | 1871.3 | 1871.3  | 1874.3 | 1871.0 | 1871.0  | 1873.0 |
| gdb 2039 | 1871.2 <sup>a</sup> | 1874.1 | 1874.1  | 1878.5 | 1873.4 | 1873.4  | 1876.0 |
| gdb 2040 | 1876.8 <sup>a</sup> | 1874.3 | 1874.2  | 1876.7 | 1876.9 | 1876.9  | 1878.1 |
| gdb 2041 | 1881.5 <sup>a</sup> | 1878.8 | 1878.8  | 1880.3 | 1879.5 | 1879.5  | 1879.9 |
| gdb 2042 | 1869.5 <sup>a</sup> | 1862.5 | 1862.5  | 1864.1 | 1862.1 | 1862.1  | 1863.6 |
| gdb 2043 | 1875.4 <sup>a</sup> | 1872.3 | 1872.3  | 1870.9 | 1867.8 | 1867.8  | 1866.2 |
| gdb 2044 | 1846.1 <sup>a</sup> | 1831.6 | 1831.6  | 1834.3 | 1828.3 | 1828.3  | 1830.9 |
| gdb 2045 | 1854.9 <sup>a</sup> | 1845.1 | 1845.1  | 1845.2 | 1837.9 | 1837.9  | 1836.7 |
| gdb 2046 | 1850.1 <sup>a</sup> | 1840.7 | 1840.7  | 1840.3 | 1833.7 | 1833.7  | 1833.1 |
| gdb 2047 | 1858.4 <sup>a</sup> | 1848.3 | 1848.3  | 1851.9 | 1847.8 | 1847.8  | 1849.3 |
| gdb 2048 | 1851.6 <sup>a</sup> | 1843.4 | 1843.4  | 1846.6 | 1843.2 | 1843.2  | 1845.3 |
| gdb 2049 | 1852.9 <sup>a</sup> | 1843.0 | 1843.0  | 1846.8 | 1842.9 | 1842.9  | 1844.2 |
| gdb 2050 | 1843.2 <sup>a</sup> | 1829.1 | 1829.1  | 1827.9 | 1823.8 | 1823.8  | 1821.8 |
| gdb 2051 | 1850.1 <sup>a</sup> | 1840.6 | 1840.6  | 1836.7 | 1831.6 | 1831.6  | 1826.2 |
| gdb 2052 | 1850.9 <sup>a</sup> | 1842.2 | 1842.2  | 1842.1 | 1839.9 | 1839.9  | 1837.6 |
| gdb 2053 | 1847.0 <sup>a</sup> | 1835.4 | 1835.4  | 1838.3 | 1835.8 | 1835.8  | 1836.3 |
| gdb 2054 | 1888.9 <sup>a</sup> | 1878.5 | 1878.5  | 1879.8 | 1876.5 | 1876.4  | 1879.8 |
| gdb 2055 | 1865.7 <sup>a</sup> | 1858.1 | 1858.1  | 1859.5 | 1859.5 | 1859.5  | 1861.5 |
| gdb 2056 | 1871.8 <sup>a</sup> | 1868.6 | 1868.6  | 1867.6 | 1865.8 | 1865.8  | 1864.5 |
| gdb 2057 | 1873.3 <sup>a</sup> | 1869.9 | 1869.9  | 1872.6 | 1874.5 | 1874.5  | 1876.1 |
| gdb 2058 | 1904.3 <sup>a</sup> | 1904.0 | 1904.0  | 1901.9 | 1901.3 | 1901.2  | 1898.5 |
| gdb 2059 | 1908.9 <sup>a</sup> | 1904.7 | 1904.7  | 1904.6 | 1903.3 | 1903.3  | 1905.4 |
| gdb 2060 | 1909.9 <sup>a</sup> | 1906.1 | 1906.1  | 1906.6 | 1903.7 | 1903.7  | 1906.2 |
| gdb 2061 | 1890.1 <sup>a</sup> | 1893.1 | 1893.1  | 1895.0 | 1892.6 | 1892.6  | 1894.9 |
| gdb 2062 | 1901.5 <sup>a</sup> | 1905.1 | 1905.1  | 1906.0 | 1908.7 | 1908.6  | 1908.5 |
| gdb 2063 | 1866.8 <sup>a</sup> | 1861.7 | 1861.7  | 1860.5 | 1855.4 | 1855.4  | 1854.6 |
| gdb 2064 | 1879.7 <sup>a</sup> | 1870.1 | 1870.1  | 1865.7 | 1861.0 | 1861.0  | 1855.4 |
| gdb 2065 | 1869.2 <sup>a</sup> | 1861.3 | 1861.3  | 1861.0 | 1855.1 | 1855.1  | 1854.5 |
| gdb 2066 | 1880.0 <sup>a</sup> | 1871.8 | 1871.8  | 1870.5 | 1869.5 | 1869.5  | 1866.4 |
| gdb 2067 | 1870.2 <sup>a</sup> | 1867.8 | 1867.8  | 1870.1 | 1868.2 | 1868.2  | 1870.0 |
| gdb 2068 | 1868.4 <sup>a</sup> | 1867.7 | 1867.7  | 1869.8 | 1867.7 | 1867.7  | 1869.0 |
| gdb 2069 | 1864.9 <sup>a</sup> | 1862.4 | 1862.4  | 1861.4 | 1855.7 | 1855.7  | 1854.3 |
| gdb 2070 | 1877.0 <sup>a</sup> | 1868.7 | 1868.7  | 1864.1 | 1859.4 | 1859.4  | 1853.2 |
| gdb 2071 | 1869.7 <sup>a</sup> | 1864.0 | 1864.0  | 1863.1 | 1858.2 | 1858.2  | 1856.4 |
| gdb 2072 | 1875.9 <sup>a</sup> | 1871.0 | 1871.0  | 1869.9 | 1868.5 | 1868.5  | 1865.1 |
| gdb 2073 | 1870.5 <sup>a</sup> | 1868.2 | 1868.2  | 1870.8 | 1869.0 | 1869.0  | 1869.8 |
| gdb 2074 | 1866.1 <sup>a</sup> | 1867.1 | 1867.1  | 1869.8 | 1867.0 | 1867.0  | 1868.1 |
| gdb 2075 | 1888.8 <sup>a</sup> | 1894.9 | 1894.9  | 1896.6 | 1893.1 | 1893.1  | 1895.3 |
| gdb 2076 | 1885.2 <sup>a</sup> | 1889.2 | 1889.2  | 1891.0 | 1888.5 | 1888.5  | 1891.2 |
| gdb 2077 | 1897.1 <sup>a</sup> | 1895.9 | 1895.9  | 1894.1 | 1892.6 | 1892.6  | 1890.7 |

... continued on next page ...

Table S73: ... continued from previous page ...

| Species  | Ref.                | OM2    | OM2-D3T | ODM2   | OM3    | OM3-D3T | ODM3   |
|----------|---------------------|--------|---------|--------|--------|---------|--------|
| gdb 2078 | 1894.8 <sup>a</sup> | 1897.1 | 1897.1  | 1898.6 | 1900.2 | 1900.2  | 1901.0 |
| gdb 2079 | 1875.8 <sup>a</sup> | 1871.8 | 1871.8  | 1874.5 | 1872.7 | 1872.7  | 1875.3 |
| gdb 2080 | 1910.6 <sup>a</sup> | 1906.1 | 1906.1  | 1906.2 | 1903.0 | 1903.0  | 1904.8 |
| gdb 2081 | 1895.8 <sup>a</sup> | 1899.2 | 1899.2  | 1900.5 | 1897.3 | 1897.3  | 1898.9 |
| gdb 2082 | 1892.6 <sup>a</sup> | 1895.1 | 1895.1  | 1896.9 | 1894.2 | 1894.2  | 1896.2 |
| gdb 2083 | 1902.9 <sup>a</sup> | 1902.8 | 1902.8  | 1900.3 | 1898.7 | 1898.7  | 1895.3 |
| gdb 2084 | 1904.4 <sup>a</sup> | 1905.0 | 1905.0  | 1906.3 | 1908.2 | 1908.2  | 1907.6 |
| gdb 2085 | 1873.4 <sup>a</sup> | 1868.8 | 1868.8  | 1868.1 | 1861.9 | 1861.9  | 1861.5 |
| gdb 2086 | 1874.0 <sup>a</sup> | 1871.3 | 1871.3  | 1874.6 | 1870.2 | 1870.2  | 1873.4 |
| gdb 2087 | 1874.9 <sup>a</sup> | 1870.8 | 1870.8  | 1873.7 | 1870.9 | 1870.9  | 1873.8 |
| gdb 2088 | 1869.0 <sup>a</sup> | 1858.3 | 1858.3  | 1861.8 | 1855.0 | 1855.0  | 1856.8 |
| gdb 2089 | 1871.4 <sup>a</sup> | 1862.6 | 1862.6  | 1866.7 | 1859.6 | 1859.6  | 1861.7 |
| gdb 2090 | 1870.0 <sup>a</sup> | 1859.4 | 1859.4  | 1862.9 | 1856.5 | 1856.4  | 1858.3 |
| gdb 2091 | 1869.8 <sup>a</sup> | 1858.5 | 1858.5  | 1860.3 | 1852.3 | 1852.3  | 1852.8 |
| gdb 2092 | 1876.5 <sup>a</sup> | 1864.9 | 1864.9  | 1870.2 | 1865.1 | 1865.1  | 1867.7 |
| gdb 2093 | 1853.6 <sup>a</sup> | 1826.0 | 1826.0  | 1831.3 | 1828.9 | 1828.9  | 1830.6 |
| gdb 2094 | 1845.0 <sup>a</sup> | 1820.6 | 1820.6  | 1823.4 | 1820.3 | 1820.3  | 1820.1 |
| gdb 2095 | 1850.4 <sup>a</sup> | 1824.3 | 1824.3  | 1829.6 | 1827.3 | 1827.3  | 1829.2 |
| gdb 2096 | 1847.5 <sup>a</sup> | 1822.4 | 1822.4  | 1825.3 | 1822.3 | 1822.3  | 1822.0 |
| gdb 2097 | 1836.5 <sup>a</sup> | 1817.6 | 1817.5  | 1818.5 | 1813.0 | 1813.0  | 1810.9 |
| gdb 2098 | 1871.0 <sup>a</sup> | 1850.2 | 1850.2  | 1855.0 | 1849.4 | 1849.4  | 1852.3 |
| gdb 2099 | 1860.3 <sup>a</sup> | 1844.9 | 1844.9  | 1847.2 | 1840.6 | 1840.6  | 1841.2 |
| gdb 2100 | 1876.9 <sup>a</sup> | 1854.1 | 1854.1  | 1859.2 | 1856.5 | 1856.5  | 1858.6 |
| gdb 2101 | 1859.0 <sup>a</sup> | 1841.0 | 1841.0  | 1844.8 | 1845.3 | 1845.3  | 1846.4 |
| gdb 2102 | 1862.5 <sup>a</sup> | 1846.0 | 1846.0  | 1849.8 | 1848.6 | 1848.6  | 1849.9 |
| gdb 2103 | 1855.5 <sup>a</sup> | 1835.9 | 1835.9  | 1838.4 | 1837.3 | 1837.3  | 1838.2 |
| gdb 2104 | 1862.2 <sup>a</sup> | 1846.1 | 1846.1  | 1849.6 | 1849.3 | 1849.3  | 1850.2 |
| gdb 2105 | 1853.0 <sup>a</sup> | 1834.7 | 1834.7  | 1836.9 | 1835.8 | 1835.8  | 1836.6 |
| gdb 2106 | 1851.3 <sup>a</sup> | 1835.5 | 1835.5  | 1837.5 | 1835.5 | 1835.5  | 1835.9 |
| gdb 2107 | 1858.9 <sup>a</sup> | 1844.2 | 1844.2  | 1847.9 | 1847.3 | 1847.2  | 1848.2 |
| gdb 2108 | 1856.6 <sup>a</sup> | 1841.8 | 1841.8  | 1845.4 | 1846.1 | 1846.1  | 1847.0 |
| gdb 2109 | 1854.3 <sup>a</sup> | 1838.2 | 1838.2  | 1839.9 | 1838.8 | 1838.8  | 1838.7 |
| gdb 2110 | 1892.7 <sup>a</sup> | 1884.9 | 1884.9  | 1886.1 | 1878.5 | 1878.5  | 1880.8 |
| gdb 2111 | 1893.7 <sup>a</sup> | 1884.2 | 1884.2  | 1886.8 | 1883.7 | 1883.7  | 1885.4 |
| gdb 2112 | 1895.4 <sup>a</sup> | 1886.6 | 1886.6  | 1887.5 | 1880.5 | 1880.5  | 1882.6 |
| gdb 2113 | 1898.4 <sup>a</sup> | 1891.4 | 1891.4  | 1894.8 | 1890.0 | 1890.0  | 1894.4 |
| gdb 2114 | 1876.0 <sup>a</sup> | 1871.9 | 1871.9  | 1874.8 | 1871.2 | 1871.2  | 1873.1 |
| gdb 2115 | 1872.5 <sup>a</sup> | 1865.4 | 1865.4  | 1868.9 | 1865.0 | 1865.0  | 1867.4 |
| gdb 2116 | 1872.4 <sup>a</sup> | 1866.4 | 1866.4  | 1869.9 | 1864.8 | 1864.8  | 1867.1 |
| gdb 2117 | 1867.3 <sup>a</sup> | 1854.9 | 1854.9  | 1857.6 | 1851.7 | 1851.7  | 1854.3 |
| gdb 2118 | 1881.5 <sup>a</sup> | 1875.8 | 1875.8  | 1879.1 | 1878.4 | 1878.4  | 1879.1 |
| gdb 2119 | 1841.1 <sup>a</sup> | 1823.8 | 1823.8  | 1827.8 | 1818.2 | 1818.1  | 1822.6 |
| gdb 2120 | 1842.8 <sup>a</sup> | 1827.9 | 1827.9  | 1829.4 | 1822.7 | 1822.7  | 1822.9 |
| gdb 2121 | 1832.7 <sup>a</sup> | 1818.5 | 1818.5  | 1820.0 | 1815.2 | 1815.2  | 1815.8 |
| gdb 2122 | 1850.3 <sup>a</sup> | 1830.2 | 1830.2  | 1835.1 | 1829.8 | 1829.8  | 1833.1 |
| gdb 2123 | 1849.0 <sup>a</sup> | 1829.6 | 1829.6  | 1833.9 | 1829.8 | 1829.8  | 1833.0 |
| gdb 2124 | 1847.5 <sup>a</sup> | 1827.6 | 1827.6  | 1832.9 | 1827.7 | 1827.7  | 1831.2 |
| gdb 2125 | 1841.5 <sup>a</sup> | 1828.8 | 1828.8  | 1831.6 | 1824.1 | 1824.1  | 1826.9 |
| gdb 2126 | 1843.3 <sup>a</sup> | 1829.8 | 1829.8  | 1832.1 | 1825.0 | 1825.0  | 1827.5 |
| gdb 2127 | 1837.3 <sup>a</sup> | 1824.8 | 1824.8  | 1828.6 | 1820.3 | 1820.3  | 1823.5 |
| gdb 2128 | 1850.4 <sup>a</sup> | 1836.5 | 1836.5  | 1837.9 | 1829.6 | 1829.6  | 1830.6 |
| gdb 2129 | 1853.6 <sup>a</sup> | 1837.6 | 1837.6  | 1842.2 | 1836.2 | 1836.2  | 1839.3 |
| gdb 2130 | 1850.0 <sup>a</sup> | 1840.0 | 1840.0  | 1845.0 | 1838.3 | 1838.3  | 1841.4 |
| gdb 2131 | 1853.3 <sup>a</sup> | 1837.1 | 1837.1  | 1841.2 | 1835.3 | 1835.2  | 1838.1 |
| gdb 2132 | 1842.7 <sup>a</sup> | 1826.4 | 1826.4  | 1830.5 | 1822.6 | 1822.6  | 1825.9 |
| gdb 2133 | 1840.7 <sup>a</sup> | 1827.1 | 1827.1  | 1828.9 | 1822.5 | 1822.5  | 1823.3 |
| gdb 2134 | 1852.4 <sup>a</sup> | 1836.5 | 1836.5  | 1841.0 | 1835.0 | 1835.0  | 1838.1 |
| gdb 2135 | 1852.7 <sup>a</sup> | 1837.5 | 1837.5  | 1841.3 | 1835.9 | 1835.9  | 1838.7 |
| gdb 2136 | 1894.8 <sup>a</sup> | 1896.8 | 1896.8  | 1898.3 | 1889.7 | 1889.7  | 1893.3 |
| gdb 2137 | 1885.4 <sup>a</sup> | 1883.5 | 1883.5  | 1886.6 | 1878.9 | 1878.9  | 1882.4 |
| gdb 2138 | 1892.1 <sup>a</sup> | 1891.6 | 1891.6  | 1893.2 | 1885.5 | 1885.5  | 1888.1 |
| gdb 2139 | 1893.0 <sup>a</sup> | 1892.0 | 1892.0  | 1895.4 | 1889.7 | 1889.7  | 1892.4 |
| gdb 2140 | 1868.8 <sup>a</sup> | 1866.2 | 1866.2  | 1869.7 | 1859.6 | 1859.6  | 1863.1 |
| gdb 2141 | 1876.1 <sup>a</sup> | 1867.7 | 1867.7  | 1871.0 | 1861.3 | 1861.3  | 1863.9 |
| gdb 2142 | 1869.3 <sup>a</sup> | 1865.9 | 1865.9  | 1870.1 | 1859.4 | 1859.3  | 1863.1 |

... continued on next page ...

Table S73: ... continued from previous page ...

| Species  | Ref.                | OM2    | OM2-D3T | ODM2   | OM3    | OM3-D3T | ODM3   |
|----------|---------------------|--------|---------|--------|--------|---------|--------|
| gdb 2143 | 1878.9 <sup>a</sup> | 1874.4 | 1874.3  | 1878.2 | 1871.0 | 1871.0  | 1873.4 |
| gdb 2144 | 1873.6 <sup>a</sup> | 1874.9 | 1874.9  | 1880.1 | 1871.1 | 1871.1  | 1874.8 |
| gdb 2145 | 1870.7 <sup>a</sup> | 1862.7 | 1862.7  | 1866.5 | 1859.7 | 1859.7  | 1861.7 |
| gdb 2146 | 1873.9 <sup>a</sup> | 1862.5 | 1862.5  | 1865.8 | 1859.8 | 1859.8  | 1861.0 |
| gdb 2147 | 1870.1 <sup>a</sup> | 1858.6 | 1858.6  | 1860.5 | 1852.3 | 1852.3  | 1853.0 |
| gdb 2148 | 1873.1 <sup>a</sup> | 1861.3 | 1861.3  | 1864.9 | 1858.5 | 1858.5  | 1860.3 |
| gdb 2149 | 1877.9 <sup>a</sup> | 1866.0 | 1866.0  | 1871.2 | 1866.5 | 1866.5  | 1868.7 |
| gdb 2150 | 1871.9 <sup>a</sup> | 1869.2 | 1869.2  | 1871.5 | 1861.7 | 1861.7  | 1866.7 |
| gdb 2151 | 1865.2 <sup>a</sup> | 1852.8 | 1852.8  | 1855.7 | 1849.8 | 1849.8  | 1853.4 |
| gdb 2152 | 1863.7 <sup>a</sup> | 1852.7 | 1852.7  | 1855.5 | 1849.1 | 1849.1  | 1852.5 |
| gdb 2153 | 1872.4 <sup>a</sup> | 1870.0 | 1870.0  | 1873.2 | 1867.9 | 1867.8  | 1870.2 |
| gdb 2154 | 1871.2 <sup>a</sup> | 1866.3 | 1866.3  | 1870.2 | 1864.9 | 1864.9  | 1867.8 |
| gdb 2155 | 1859.4 <sup>a</sup> | 1845.5 | 1845.5  | 1849.3 | 1847.9 | 1847.9  | 1849.0 |
| gdb 2156 | 1859.5 <sup>a</sup> | 1840.7 | 1840.7  | 1843.5 | 1840.2 | 1840.2  | 1841.1 |
| gdb 2157 | 1869.3 <sup>a</sup> | 1857.8 | 1857.8  | 1859.9 | 1851.7 | 1851.7  | 1852.6 |
| gdb 2158 | 1873.5 <sup>a</sup> | 1861.5 | 1861.5  | 1865.1 | 1859.0 | 1859.0  | 1860.7 |
| gdb 2159 | 1878.1 <sup>a</sup> | 1866.2 | 1866.2  | 1871.4 | 1866.4 | 1866.4  | 1869.0 |
| gdb 2160 | 1868.5 <sup>a</sup> | 1850.0 | 1850.0  | 1854.9 | 1848.6 | 1848.6  | 1851.5 |
| gdb 2161 | 1869.8 <sup>a</sup> | 1849.5 | 1849.5  | 1854.7 | 1848.2 | 1848.2  | 1851.4 |
| gdb 2162 | 1857.8 <sup>a</sup> | 1843.3 | 1843.3  | 1845.8 | 1838.5 | 1838.5  | 1839.4 |
| gdb 2163 | 1867.5 <sup>a</sup> | 1851.5 | 1851.5  | 1853.7 | 1850.5 | 1850.4  | 1849.7 |
| gdb 2164 | 1859.8 <sup>a</sup> | 1845.9 | 1845.9  | 1847.8 | 1841.3 | 1841.3  | 1841.8 |
| gdb 2165 | 1871.7 <sup>a</sup> | 1852.1 | 1852.1  | 1856.7 | 1850.6 | 1850.6  | 1853.5 |
| gdb 2166 | 1877.9 <sup>a</sup> | 1857.3 | 1857.3  | 1862.4 | 1859.3 | 1859.3  | 1861.1 |
| gdb 2167 | 1889.9 <sup>a</sup> | 1886.1 | 1886.1  | 1888.8 | 1877.4 | 1877.4  | 1881.5 |
| gdb 2168 | 1884.6 <sup>a</sup> | 1878.9 | 1878.9  | 1882.7 | 1872.7 | 1872.7  | 1876.1 |
| gdb 2169 | 1885.2 <sup>a</sup> | 1879.1 | 1879.1  | 1882.0 | 1872.5 | 1872.5  | 1874.8 |
| gdb 2170 | 1883.9 <sup>a</sup> | 1879.2 | 1879.2  | 1881.9 | 1873.1 | 1873.1  | 1875.4 |
| gdb 2171 | 1890.0 <sup>a</sup> | 1884.5 | 1884.5  | 1889.0 | 1881.5 | 1881.5  | 1885.0 |
| gdb 2172 | 1890.2 <sup>a</sup> | 1883.0 | 1883.0  | 1887.9 | 1879.6 | 1879.6  | 1883.4 |
| gdb 2173 | 1863.6 <sup>a</sup> | 1847.1 | 1847.1  | 1852.2 | 1840.2 | 1840.2  | 1846.6 |
| gdb 2174 | 1856.7 <sup>a</sup> | 1842.5 | 1842.5  | 1844.9 | 1838.0 | 1838.0  | 1838.9 |
| gdb 2175 | 1854.2 <sup>a</sup> | 1840.4 | 1840.4  | 1842.5 | 1837.0 | 1837.0  | 1838.5 |
| gdb 2176 | 1867.7 <sup>a</sup> | 1847.4 | 1847.4  | 1853.0 | 1846.7 | 1846.7  | 1850.6 |
| gdb 2177 | 1866.0 <sup>a</sup> | 1846.1 | 1846.1  | 1851.3 | 1846.4 | 1846.4  | 1850.3 |
| gdb 2178 | 1866.3 <sup>a</sup> | 1861.9 | 1861.9  | 1866.4 | 1858.7 | 1858.7  | 1861.5 |
| gdb 2179 | 1871.4 <sup>a</sup> | 1871.3 | 1871.3  | 1876.5 | 1870.3 | 1870.2  | 1872.7 |
| gdb 2180 | 1865.3 <sup>a</sup> | 1861.0 | 1861.0  | 1865.3 | 1857.8 | 1857.8  | 1860.5 |
| gdb 2181 | 1864.4 <sup>a</sup> | 1862.7 | 1862.7  | 1866.7 | 1858.8 | 1858.8  | 1860.5 |
| gdb 2182 | 1861.5 <sup>a</sup> | 1859.6 | 1859.6  | 1864.0 | 1855.5 | 1855.5  | 1857.8 |
| gdb 2183 | 1869.3 <sup>a</sup> | 1870.5 | 1870.5  | 1875.6 | 1869.5 | 1869.5  | 1871.2 |
| gdb 2184 | 1898.2 <sup>a</sup> | 1901.1 | 1901.1  | 1903.8 | 1891.9 | 1891.9  | 1895.9 |
| gdb 2185 | 1900.2 <sup>a</sup> | 1903.8 | 1903.8  | 1906.2 | 1894.2 | 1894.2  | 1897.4 |
| gdb 2186 | 1898.0 <sup>a</sup> | 1894.5 | 1894.5  | 1897.3 | 1887.6 | 1887.6  | 1890.3 |
| gdb 2187 | 1898.9 <sup>a</sup> | 1894.7 | 1894.7  | 1898.2 | 1891.0 | 1891.0  | 1893.8 |
| gdb 2188 | 1875.2 <sup>a</sup> | 1876.7 | 1876.7  | 1880.6 | 1870.8 | 1870.8  | 1874.9 |
| gdb 2189 | 1875.3 <sup>a</sup> | 1876.7 | 1876.7  | 1881.1 | 1870.7 | 1870.7  | 1874.8 |
| gdb 2190 | 1875.5 <sup>a</sup> | 1885.6 | 1885.6  | 1890.5 | 1881.8 | 1881.8  | 1885.1 |
| gdb 2191 | 1879.9 <sup>a</sup> | 1881.8 | 1881.8  | 1885.9 | 1879.2 | 1879.2  | 1881.7 |
| gdb 2192 | 1898.0 <sup>a</sup> | 1894.9 | 1894.9  | 1897.9 | 1888.1 | 1888.1  | 1890.6 |
| gdb 2193 | 1898.8 <sup>a</sup> | 1902.8 | 1902.8  | 1905.2 | 1892.8 | 1892.8  | 1896.0 |
| gdb 2194 | 1896.7 <sup>a</sup> | 1900.6 | 1900.6  | 1903.6 | 1890.5 | 1890.5  | 1894.2 |
| gdb 2195 | 1897.3 <sup>a</sup> | 1899.9 | 1899.9  | 1902.8 | 1890.4 | 1890.4  | 1894.5 |
| gdb 2196 | 1900.8 <sup>a</sup> | 1901.4 | 1901.4  | 1905.4 | 1897.5 | 1897.5  | 1899.9 |
| gdb 2197 | 1898.4 <sup>a</sup> | 1898.4 | 1898.4  | 1902.9 | 1894.7 | 1894.7  | 1897.9 |
| gdb 2198 | 1859.6 <sup>a</sup> | 1841.0 | 1841.0  | 1844.6 | 1845.3 | 1845.3  | 1846.3 |
| gdb 2199 | 1855.9 <sup>a</sup> | 1840.1 | 1840.1  | 1843.7 | 1844.6 | 1844.6  | 1845.6 |
| gdb 2200 | 1850.3 <sup>a</sup> | 1833.3 | 1833.3  | 1835.6 | 1833.4 | 1833.4  | 1834.2 |
| gdb 2201 | 1852.4 <sup>a</sup> | 1833.0 | 1833.0  | 1835.4 | 1833.9 | 1833.9  | 1834.9 |
| gdb 2202 | 1890.8 <sup>a</sup> | 1880.8 | 1880.8  | 1883.8 | 1880.5 | 1880.5  | 1882.5 |
| gdb 2203 | 1890.6 <sup>a</sup> | 1881.7 | 1881.7  | 1883.2 | 1875.3 | 1875.3  | 1877.9 |
| gdb 2204 | 1893.5 <sup>a</sup> | 1883.6 | 1883.6  | 1884.7 | 1877.5 | 1877.4  | 1879.8 |
| gdb 2205 | 1893.3 <sup>a</sup> | 1882.6 | 1882.6  | 1885.2 | 1882.6 | 1882.6  | 1884.3 |
| gdb 2206 | 1896.6 <sup>a</sup> | 1885.6 | 1885.6  | 1888.8 | 1888.7 | 1888.7  | 1890.3 |
| gdb 2207 | 1882.9 <sup>a</sup> | 1879.7 | 1879.7  | 1883.1 | 1875.7 | 1875.7  | 1879.5 |

... continued on next page ...

Table S73: ... continued from previous page ...

| Species  | Ref.                | OM2    | OM2-D3T | ODM2   | OM3    | OM3-D3T | ODM3   |
|----------|---------------------|--------|---------|--------|--------|---------|--------|
| gdb 2208 | 1891.4 <sup>a</sup> | 1891.2 | 1891.2  | 1893.7 | 1884.4 | 1884.3  | 1888.7 |
| gdb 2209 | 1893.8 <sup>a</sup> | 1893.1 | 1893.1  | 1895.1 | 1886.5 | 1886.5  | 1890.5 |
| gdb 2210 | 1885.5 <sup>a</sup> | 1881.6 | 1881.6  | 1884.7 | 1877.9 | 1877.9  | 1881.4 |
| gdb 2211 | 1890.6 <sup>a</sup> | 1888.1 | 1888.1  | 1889.9 | 1882.5 | 1882.5  | 1885.3 |
| gdb 2212 | 1893.6 <sup>a</sup> | 1892.8 | 1892.8  | 1895.9 | 1892.2 | 1892.2  | 1894.7 |
| gdb 2213 | 1891.1 <sup>a</sup> | 1887.0 | 1887.0  | 1890.4 | 1887.0 | 1887.0  | 1889.8 |
| gdb 2214 | 1892.4 <sup>a</sup> | 1888.3 | 1888.3  | 1891.1 | 1888.8 | 1888.8  | 1890.5 |
| gdb 2215 | 1869.0 <sup>a</sup> | 1860.9 | 1860.9  | 1865.0 | 1857.7 | 1857.7  | 1860.0 |
| gdb 2216 | 1873.9 <sup>a</sup> | 1862.5 | 1862.5  | 1865.7 | 1859.9 | 1859.9  | 1861.0 |
| gdb 2217 | 1870.6 <sup>a</sup> | 1859.5 | 1859.5  | 1861.1 | 1853.2 | 1853.2  | 1853.5 |
| gdb 2218 | 1874.8 <sup>a</sup> | 1864.4 | 1864.4  | 1869.4 | 1865.0 | 1865.0  | 1867.1 |
| gdb 2219 | 1894.3 <sup>a</sup> | 1897.7 | 1897.7  | 1901.1 | 1888.1 | 1888.1  | 1892.6 |
| gdb 2220 | 1898.9 <sup>a</sup> | 1902.9 | 1902.9  | 1905.4 | 1893.0 | 1893.0  | 1896.3 |
| gdb 2221 | 1898.2 <sup>a</sup> | 1895.5 | 1895.5  | 1898.0 | 1888.7 | 1888.7  | 1891.0 |
| gdb 2222 | 1894.1 <sup>a</sup> | 1896.2 | 1896.2  | 1900.7 | 1892.4 | 1892.4  | 1895.4 |
| gdb 2223 | 1898.0 <sup>a</sup> | 1894.8 | 1894.8  | 1898.2 | 1891.6 | 1891.6  | 1893.8 |
| gdb 2224 | 1894.3 <sup>a</sup> | 1898.6 | 1898.6  | 1899.1 | 1886.9 | 1886.9  | 1888.9 |
| gdb 2225 | 1892.1 <sup>a</sup> | 1892.9 | 1892.9  | 1894.8 | 1884.9 | 1884.9  | 1886.6 |
| gdb 2226 | 1891.7 <sup>a</sup> | 1896.5 | 1896.5  | 1897.4 | 1884.7 | 1884.7  | 1886.9 |
| gdb 2227 | 1896.0 <sup>a</sup> | 1899.9 | 1899.9  | 1900.4 | 1888.6 | 1888.6  | 1890.6 |
| gdb 2228 | 1891.2 <sup>a</sup> | 1891.2 | 1891.2  | 1894.5 | 1886.6 | 1886.6  | 1888.7 |
| gdb 2229 | 1882.0 <sup>a</sup> | 1876.5 | 1876.5  | 1880.7 | 1870.0 | 1870.0  | 1873.9 |
| gdb 2230 | 1887.6 <sup>a</sup> | 1884.0 | 1884.0  | 1887.1 | 1875.1 | 1875.1  | 1879.5 |
| gdb 2231 | 1885.1 <sup>a</sup> | 1878.8 | 1878.8  | 1881.9 | 1872.2 | 1872.2  | 1874.6 |
| gdb 2232 | 1883.9 <sup>a</sup> | 1879.2 | 1879.2  | 1881.8 | 1873.1 | 1873.1  | 1875.4 |
| gdb 2233 | 1890.1 <sup>a</sup> | 1882.7 | 1882.7  | 1887.6 | 1879.7 | 1879.7  | 1883.4 |
| gdb 2234 | 1890.5 <sup>a</sup> | 1884.2 | 1884.2  | 1888.6 | 1881.5 | 1881.5  | 1884.7 |
| gdb 2235 | 1890.0 <sup>a</sup> | 1883.1 | 1883.1  | 1887.2 | 1880.0 | 1880.0  | 1882.4 |
| gdb 2236 | 1876.2 <sup>a</sup> | 1876.9 | 1876.9  | 1881.0 | 1871.2 | 1871.2  | 1875.2 |
| gdb 2237 | 1879.0 <sup>a</sup> | 1886.8 | 1886.8  | 1891.6 | 1883.4 | 1883.4  | 1886.8 |
| gdb 2238 | 1871.6 <sup>a</sup> | 1867.4 | 1867.4  | 1870.6 | 1866.3 | 1866.3  | 1868.4 |
| gdb 2239 | 1873.7 <sup>a</sup> | 1868.3 | 1868.3  | 1871.8 | 1867.0 | 1867.0  | 1869.5 |
| gdb 2240 | 1873.2 <sup>a</sup> | 1860.4 | 1860.4  | 1863.0 | 1861.0 | 1861.0  | 1862.3 |
| gdb 2241 | 1865.9 <sup>a</sup> | 1853.1 | 1853.1  | 1855.6 | 1850.1 | 1850.1  | 1852.8 |
| gdb 2242 | 1874.0 <sup>a</sup> | 1866.0 | 1866.0  | 1869.4 | 1865.2 | 1865.2  | 1867.6 |
| gdb 2243 | 1879.2 <sup>a</sup> | 1870.7 | 1870.7  | 1874.0 | 1873.8 | 1873.8  | 1874.6 |
| gdb 2244 | 1873.7 <sup>a</sup> | 1868.1 | 1868.1  | 1871.2 | 1867.8 | 1867.7  | 1869.9 |
| gdb 2245 | 1872.1 <sup>a</sup> | 1863.7 | 1863.7  | 1867.0 | 1863.2 | 1863.2  | 1865.6 |
| gdb 2246 | 1870.5 <sup>a</sup> | 1862.0 | 1862.0  | 1865.1 | 1861.9 | 1861.9  | 1864.2 |
| gdb 2247 | 1871.7 <sup>a</sup> | 1866.5 | 1866.5  | 1869.4 | 1865.9 | 1865.9  | 1867.9 |
| gdb 2248 | 1873.0 <sup>a</sup> | 1859.7 | 1859.7  | 1861.7 | 1860.7 | 1860.7  | 1861.4 |
| gdb 2249 | 1864.3 <sup>a</sup> | 1851.2 | 1851.2  | 1853.5 | 1848.4 | 1848.4  | 1851.0 |
| gdb 2250 | 1877.4 <sup>a</sup> | 1869.2 | 1869.1  | 1872.3 | 1873.2 | 1873.2  | 1873.9 |
| gdb 2251 | 1867.1 <sup>a</sup> | 1864.2 | 1864.2  | 1868.1 | 1857.8 | 1857.8  | 1861.5 |
| gdb 2252 | 1876.6 <sup>a</sup> | 1868.4 | 1868.4  | 1871.3 | 1862.3 | 1862.3  | 1864.4 |
| gdb 2253 | 1869.8 <sup>a</sup> | 1866.3 | 1866.3  | 1870.1 | 1860.0 | 1860.0  | 1863.5 |
| gdb 2254 | 1879.1 <sup>a</sup> | 1874.7 | 1874.7  | 1878.4 | 1871.5 | 1871.5  | 1873.4 |
| gdb 2255 | 1873.4 <sup>a</sup> | 1874.6 | 1874.6  | 1879.6 | 1871.0 | 1871.0  | 1874.5 |
| gdb 2256 | 1874.9 <sup>a</sup> | 1875.1 | 1875.1  | 1880.2 | 1871.6 | 1871.6  | 1875.4 |
| gdb 2257 | 1869.7 <sup>a</sup> | 1865.4 | 1865.4  | 1867.9 | 1858.6 | 1858.6  | 1863.7 |
| gdb 2258 | 1863.9 <sup>a</sup> | 1850.3 | 1850.3  | 1853.5 | 1847.8 | 1847.8  | 1851.4 |
| gdb 2259 | 1863.1 <sup>a</sup> | 1850.5 | 1850.5  | 1853.0 | 1848.0 | 1848.0  | 1851.4 |
| gdb 2260 | 1870.1 <sup>a</sup> | 1862.7 | 1862.7  | 1865.7 | 1863.5 | 1863.5  | 1866.0 |
| gdb 2261 | 1870.8 <sup>a</sup> | 1863.7 | 1863.7  | 1867.0 | 1863.6 | 1863.6  | 1866.4 |
| gdb 2262 | 1870.0 <sup>a</sup> | 1863.1 | 1863.1  | 1866.5 | 1863.8 | 1863.8  | 1866.1 |
| gdb 2263 | 1895.3 <sup>a</sup> | 1898.8 | 1898.8  | 1901.7 | 1894.2 | 1894.2  | 1896.9 |
| gdb 2264 | 1896.6 <sup>a</sup> | 1904.6 | 1904.6  | 1904.9 | 1894.0 | 1894.0  | 1896.4 |
| gdb 2265 | 1901.0 <sup>a</sup> | 1903.3 | 1903.3  | 1907.2 | 1901.9 | 1901.9  | 1904.1 |
| gdb 2266 | 1914.4 <sup>a</sup> | 1920.3 | 1920.3  | 1922.2 | 1917.9 | 1917.9  | 1920.5 |
| gdb 2267 | 1932.7 <sup>a</sup> | 1929.2 | 1929.2  | 1930.1 | 1925.7 | 1925.7  | 1928.2 |
| gdb 2268 | 1916.4 <sup>a</sup> | 1923.9 | 1923.9  | 1924.9 | 1920.7 | 1920.7  | 1921.7 |
| gdb 2269 | 1910.1 <sup>a</sup> | 1915.3 | 1915.3  | 1917.4 | 1912.5 | 1912.5  | 1915.1 |
| gdb 2270 | 1919.9 <sup>a</sup> | 1925.1 | 1925.1  | 1927.6 | 1925.6 | 1925.6  | 1927.2 |
| gdb 2271 | 1885.6 <sup>a</sup> | 1882.0 | 1882.0  | 1881.2 | 1873.1 | 1873.1  | 1872.3 |
| gdb 2272 | 1887.7 <sup>a</sup> | 1883.5 | 1883.5  | 1882.0 | 1874.1 | 1874.1  | 1871.9 |

... continued on next page ...

Table S73: ... continued from previous page ...

| Species  | Ref.                | OM2    | OM2-D3T | ODM2   | OM3    | OM3-D3T | ODM3   |
|----------|---------------------|--------|---------|--------|--------|---------|--------|
| gdb 2273 | 1883.3 <sup>a</sup> | 1879.7 | 1879.7  | 1879.5 | 1870.8 | 1870.8  | 1870.3 |
| gdb 2274 | 1890.4 <sup>a</sup> | 1892.8 | 1892.8  | 1892.8 | 1882.9 | 1882.9  | 1884.9 |
| gdb 2275 | 1891.7 <sup>a</sup> | 1894.2 | 1894.2  | 1895.1 | 1884.7 | 1884.7  | 1886.5 |
| gdb 2276 | 1886.6 <sup>a</sup> | 1886.0 | 1886.0  | 1885.9 | 1880.3 | 1880.3  | 1878.4 |
| gdb 2277 | 1886.4 <sup>a</sup> | 1885.6 | 1885.6  | 1888.4 | 1882.2 | 1882.2  | 1884.0 |
| gdb 2278 | 1904.5 <sup>a</sup> | 1911.3 | 1911.3  | 1912.9 | 1901.8 | 1901.8  | 1905.3 |
| gdb 2279 | 1901.7 <sup>a</sup> | 1909.0 | 1909.0  | 1910.9 | 1898.9 | 1898.8  | 1902.6 |
| gdb 2280 | 1902.1 <sup>a</sup> | 1906.6 | 1906.6  | 1909.8 | 1902.8 | 1902.7  | 1905.6 |
| gdb 2281 | 1903.1 <sup>a</sup> | 1909.9 | 1909.9  | 1911.8 | 1900.1 | 1900.1  | 1903.8 |
| gdb 2282 | 1903.5 <sup>a</sup> | 1910.5 | 1910.5  | 1912.0 | 1900.9 | 1900.9  | 1904.3 |
| gdb 2283 | 1902.3 <sup>a</sup> | 1906.5 | 1906.5  | 1909.9 | 1902.9 | 1902.9  | 1905.7 |
| gdb 2284 | 1906.7 <sup>a</sup> | 1913.3 | 1913.3  | 1914.8 | 1910.9 | 1910.9  | 1912.8 |
| gdb 2285 | 1904.6 <sup>a</sup> | 1910.7 | 1910.7  | 1912.9 | 1908.3 | 1908.3  | 1910.6 |
| gdb 2286 | 1914.9 <sup>a</sup> | 1918.8 | 1918.8  | 1921.0 | 1919.9 | 1919.9  | 1920.8 |
| gdb 2287 | 1891.4 <sup>a</sup> | 1900.0 | 1900.0  | 1902.5 | 1892.3 | 1892.3  | 1896.3 |
| gdb 2288 | 1895.1 <sup>a</sup> | 1904.1 | 1904.1  | 1906.8 | 1893.8 | 1893.8  | 1899.3 |
| gdb 2289 | 1898.1 <sup>a</sup> | 1908.0 | 1908.0  | 1909.4 | 1898.4 | 1898.4  | 1903.0 |
| gdb 2290 | 1899.2 <sup>a</sup> | 1905.4 | 1905.4  | 1908.5 | 1901.5 | 1901.5  | 1904.3 |
| gdb 2291 | 1913.0 <sup>a</sup> | 1917.8 | 1917.8  | 1919.3 | 1915.1 | 1915.1  | 1917.1 |
| gdb 2292 | 1931.1 <sup>a</sup> | 1927.1 | 1927.1  | 1928.5 | 1923.4 | 1923.4  | 1926.1 |
| gdb 2293 | 1916.7 <sup>a</sup> | 1924.0 | 1924.0  | 1925.1 | 1920.9 | 1920.8  | 1921.7 |
| gdb 2294 | 1912.8 <sup>a</sup> | 1918.1 | 1918.1  | 1920.5 | 1915.5 | 1915.5  | 1918.4 |
| gdb 2295 | 1921.5 <sup>a</sup> | 1923.9 | 1923.9  | 1926.2 | 1924.6 | 1924.6  | 1925.7 |
| gdb 2296 | 1884.3 <sup>a</sup> | 1884.3 | 1884.3  | 1886.6 | 1882.9 | 1882.9  | 1885.2 |
| gdb 2297 | 1905.4 <sup>a</sup> | 1894.5 | 1894.5  | 1895.9 | 1892.0 | 1892.0  | 1894.1 |
| gdb 2298 | 1888.3 <sup>a</sup> | 1894.1 | 1894.1  | 1896.8 | 1894.4 | 1894.4  | 1895.3 |
| gdb 2299 | 1887.9 <sup>a</sup> | 1895.1 | 1895.1  | 1898.3 | 1895.8 | 1895.8  | 1897.3 |
| gdb 2300 | 1881.7 <sup>a</sup> | 1882.5 | 1882.5  | 1884.6 | 1880.7 | 1880.7  | 1882.5 |
| gdb 2301 | 1853.6 <sup>a</sup> | 1853.3 | 1853.3  | 1853.9 | 1847.2 | 1847.2  | 1845.0 |
| gdb 2302 | 1848.9 <sup>a</sup> | 1841.8 | 1841.7  | 1841.3 | 1833.3 | 1833.3  | 1831.9 |
| gdb 2303 | 1855.4 <sup>a</sup> | 1850.9 | 1850.9  | 1853.8 | 1847.6 | 1847.6  | 1848.4 |
| gdb 2304 | 1858.6 <sup>a</sup> | 1861.2 | 1861.2  | 1865.0 | 1860.8 | 1860.8  | 1860.9 |
| gdb 2305 | 1881.1 <sup>a</sup> | 1875.3 | 1875.3  | 1878.2 | 1876.7 | 1876.7  | 1878.0 |
| gdb 2306 | 1870.4 <sup>a</sup> | 1859.4 | 1859.4  | 1860.2 | 1860.4 | 1860.3  | 1861.9 |
| gdb 2307 | 1890.9 <sup>a</sup> | 1890.3 | 1890.3  | 1893.5 | 1886.7 | 1886.7  | 1888.9 |
| gdb 2308 | 1890.1 <sup>a</sup> | 1890.2 | 1890.2  | 1893.4 | 1886.6 | 1886.5  | 1888.8 |
| gdb 2309 | 1894.8 <sup>a</sup> | 1901.5 | 1901.5  | 1905.2 | 1900.1 | 1900.1  | 1901.2 |
| gdb 2310 | 1876.3 <sup>a</sup> | 1877.8 | 1877.8  | 1880.0 | 1875.2 | 1875.2  | 1877.9 |
| gdb 2311 | 1874.9 <sup>a</sup> | 1877.3 | 1877.3  | 1879.5 | 1874.7 | 1874.6  | 1876.9 |
| gdb 2312 | 1882.0 <sup>a</sup> | 1890.7 | 1890.7  | 1893.7 | 1890.4 | 1890.3  | 1892.1 |
| gdb 2313 | 1848.4 <sup>a</sup> | 1837.6 | 1837.6  | 1839.0 | 1830.3 | 1830.3  | 1831.3 |
| gdb 2314 | 1840.7 <sup>a</sup> | 1826.0 | 1826.0  | 1830.6 | 1821.5 | 1821.5  | 1824.9 |
| gdb 2315 | 1861.2 <sup>a</sup> | 1854.8 | 1854.8  | 1857.6 | 1850.8 | 1850.8  | 1851.5 |
| gdb 2316 | 1854.2 <sup>a</sup> | 1840.1 | 1840.1  | 1844.6 | 1838.1 | 1838.1  | 1840.7 |
| gdb 2317 | 1838.5 <sup>a</sup> | 1826.4 | 1826.4  | 1829.8 | 1821.2 | 1821.2  | 1824.5 |
| gdb 2318 | 1837.6 <sup>a</sup> | 1826.0 | 1826.0  | 1829.7 | 1821.3 | 1821.2  | 1824.4 |
| gdb 2319 | 1842.7 <sup>a</sup> | 1829.5 | 1829.5  | 1832.5 | 1824.5 | 1824.5  | 1827.3 |
| gdb 2320 | 1848.8 <sup>a</sup> | 1836.4 | 1836.3  | 1837.6 | 1829.0 | 1829.0  | 1830.0 |
| gdb 2321 | 1850.7 <sup>a</sup> | 1841.8 | 1841.8  | 1846.8 | 1840.2 | 1840.1  | 1843.2 |
| gdb 2322 | 1855.3 <sup>a</sup> | 1846.5 | 1846.5  | 1850.4 | 1844.2 | 1844.1  | 1846.3 |
| gdb 2323 | 1861.3 <sup>a</sup> | 1853.0 | 1853.0  | 1855.5 | 1848.8 | 1848.7  | 1849.2 |
| gdb 2324 | 1853.0 <sup>a</sup> | 1838.3 | 1838.3  | 1842.9 | 1836.7 | 1836.7  | 1839.6 |
| gdb 2325 | 1852.1 <sup>a</sup> | 1842.5 | 1842.5  | 1846.2 | 1837.0 | 1837.0  | 1840.3 |
| gdb 2326 | 1851.1 <sup>a</sup> | 1841.7 | 1841.7  | 1844.8 | 1836.7 | 1836.7  | 1840.1 |
| gdb 2327 | 1854.7 <sup>a</sup> | 1843.6 | 1843.6  | 1848.1 | 1838.7 | 1838.7  | 1842.3 |
| gdb 2328 | 1854.4 <sup>a</sup> | 1844.1 | 1844.1  | 1848.5 | 1839.3 | 1839.3  | 1842.6 |
| gdb 2329 | 1849.8 <sup>a</sup> | 1840.7 | 1840.6  | 1844.4 | 1835.1 | 1835.1  | 1838.6 |
| gdb 2330 | 1855.7 <sup>a</sup> | 1854.2 | 1854.1  | 1858.4 | 1851.3 | 1851.3  | 1854.2 |
| gdb 2331 | 1859.0 <sup>a</sup> | 1855.4 | 1855.4  | 1860.2 | 1852.7 | 1852.6  | 1855.4 |
| gdb 2332 | 1858.4 <sup>a</sup> | 1856.0 | 1856.0  | 1860.7 | 1853.0 | 1853.0  | 1855.5 |
| gdb 2333 | 1870.7 <sup>a</sup> | 1867.5 | 1867.5  | 1870.2 | 1861.7 | 1861.7  | 1865.3 |
| gdb 2334 | 1879.4 <sup>a</sup> | 1882.0 | 1882.0  | 1885.4 | 1878.9 | 1878.9  | 1881.7 |
| gdb 2335 | 1902.1 <sup>a</sup> | 1906.0 | 1906.0  | 1907.5 | 1904.8 | 1904.7  | 1906.4 |
| gdb 2336 | 1897.6 <sup>a</sup> | 1911.1 | 1911.1  | 1913.4 | 1909.0 | 1909.0  | 1911.4 |
| gdb 2337 | 1913.3 <sup>a</sup> | 1916.4 | 1916.4  | 1918.1 | 1913.1 | 1913.1  | 1916.1 |

... continued on next page ...



Table S73: ... continued from previous page ...

| Species  | Ref.                | OM2    | OM2-D3T | ODM2   | OM3    | OM3-D3T | ODM3   |
|----------|---------------------|--------|---------|--------|--------|---------|--------|
| gdb 2338 | 1895.5 <sup>a</sup> | 1900.4 | 1900.4  | 1901.7 | 1898.8 | 1898.8  | 1900.4 |
| gdb 2339 | 1903.9 <sup>a</sup> | 1917.3 | 1917.3  | 1917.3 | 1919.5 | 1918.3  | 1919.0 |
| gdb 2340 | 1875.2 <sup>a</sup> | 1876.1 | 1876.1  | 1878.7 | 1874.8 | 1874.8  | 1877.9 |
| gdb 2341 | 1875.2 <sup>a</sup> | 1877.8 | 1877.8  | 1880.6 | 1876.1 | 1876.1  | 1878.7 |
| gdb 2342 | 1872.7 <sup>a</sup> | 1874.7 | 1874.6  | 1877.2 | 1873.0 | 1873.0  | 1876.0 |
| gdb 2343 | 1877.5 <sup>a</sup> | 1887.0 | 1887.0  | 1890.4 | 1887.6 | 1887.6  | 1889.8 |
| gdb 2344 | 1854.5 <sup>a</sup> | 1848.9 | 1848.9  | 1848.8 | 1841.4 | 1841.3  | 1840.5 |
| gdb 2345 | 1851.1 <sup>a</sup> | 1842.0 | 1842.0  | 1845.1 | 1838.2 | 1838.2  | 1840.2 |
| gdb 2346 | 1850.7 <sup>a</sup> | 1847.4 | 1847.4  | 1847.1 | 1839.3 | 1839.3  | 1838.2 |
| gdb 2347 | 1858.7 <sup>a</sup> | 1860.6 | 1860.6  | 1861.3 | 1855.3 | 1855.3  | 1853.5 |
| gdb 2348 | 1854.6 <sup>a</sup> | 1854.6 | 1854.6  | 1858.1 | 1851.8 | 1851.8  | 1853.4 |
| gdb 2349 | 1878.0 <sup>a</sup> | 1872.6 | 1872.6  | 1872.0 | 1865.2 | 1865.1  | 1864.4 |
| gdb 2350 | 1870.4 <sup>a</sup> | 1869.9 | 1869.9  | 1873.1 | 1865.0 | 1865.0  | 1868.2 |
| gdb 2351 | 1874.5 <sup>a</sup> | 1869.7 | 1869.7  | 1869.2 | 1861.8 | 1861.8  | 1861.0 |
| gdb 2352 | 1879.4 <sup>a</sup> | 1882.7 | 1882.7  | 1882.8 | 1877.3 | 1877.3  | 1875.5 |
| gdb 2353 | 1877.0 <sup>a</sup> | 1877.9 | 1877.9  | 1880.7 | 1875.3 | 1875.3  | 1876.9 |
| gdb 2354 | 1863.6 <sup>a</sup> | 1852.7 | 1852.7  | 1855.2 | 1845.8 | 1845.8  | 1848.1 |
| gdb 2355 | 1866.1 <sup>a</sup> | 1854.7 | 1854.7  | 1857.2 | 1848.0 | 1848.0  | 1850.1 |
| gdb 2356 | 1870.5 <sup>a</sup> | 1866.9 | 1866.9  | 1870.0 | 1862.6 | 1862.6  | 1863.5 |
| gdb 2357 | 1872.5 <sup>a</sup> | 1860.8 | 1860.8  | 1865.6 | 1857.6 | 1857.6  | 1861.2 |
| gdb 2358 | 1852.7 <sup>a</sup> | 1844.4 | 1844.4  | 1848.5 | 1838.9 | 1838.9  | 1843.4 |
| gdb 2359 | 1851.8 <sup>a</sup> | 1843.2 | 1843.2  | 1847.2 | 1837.4 | 1837.3  | 1841.7 |
| gdb 2360 | 1855.2 <sup>a</sup> | 1845.8 | 1845.8  | 1850.0 | 1840.3 | 1840.3  | 1844.5 |
| gdb 2361 | 1854.6 <sup>a</sup> | 1845.7 | 1845.7  | 1849.6 | 1840.2 | 1840.2  | 1844.5 |
| gdb 2362 | 1856.5 <sup>a</sup> | 1854.6 | 1854.6  | 1859.5 | 1851.3 | 1851.2  | 1854.7 |
| gdb 2363 | 1859.3 <sup>a</sup> | 1857.4 | 1857.4  | 1862.1 | 1854.0 | 1853.9  | 1857.4 |
| gdb 2364 | 1858.1 <sup>a</sup> | 1857.0 | 1857.0  | 1861.8 | 1853.7 | 1853.7  | 1856.8 |
| gdb 2365 | 1877.1 <sup>a</sup> | 1870.4 | 1870.4  | 1872.5 | 1872.8 | 1872.8  | 1874.1 |
| gdb 2366 | 1876.5 <sup>a</sup> | 1870.8 | 1870.8  | 1872.3 | 1873.5 | 1873.5  | 1873.8 |
| gdb 2367 | 1867.7 <sup>a</sup> | 1858.1 | 1858.1  | 1859.6 | 1857.5 | 1857.5  | 1859.5 |
| gdb 2368 | 1871.1 <sup>a</sup> | 1859.8 | 1859.8  | 1861.5 | 1859.7 | 1859.7  | 1861.8 |
| gdb 2369 | 1841.0 <sup>a</sup> | 1821.9 | 1821.9  | 1824.8 | 1819.7 | 1819.7  | 1822.9 |
| gdb 2370 | 1839.1 <sup>a</sup> | 1824.2 | 1824.2  | 1826.3 | 1821.1 | 1821.1  | 1824.2 |
| gdb 2371 | 1843.9 <sup>a</sup> | 1823.7 | 1823.7  | 1826.8 | 1821.8 | 1821.8  | 1824.9 |
| gdb 2372 | 1842.0 <sup>a</sup> | 1825.8 | 1825.8  | 1828.2 | 1823.1 | 1823.0  | 1826.1 |
| gdb 2373 | 1853.4 <sup>a</sup> | 1838.9 | 1838.9  | 1842.8 | 1839.4 | 1839.4  | 1841.7 |
| gdb 2374 | 1848.5 <sup>a</sup> | 1839.0 | 1839.0  | 1842.1 | 1839.0 | 1839.0  | 1841.2 |
| gdb 2375 | 1845.1 <sup>a</sup> | 1835.0 | 1835.0  | 1838.5 | 1835.5 | 1835.5  | 1837.4 |
| gdb 2376 | 1840.7 <sup>a</sup> | 1825.4 | 1825.3  | 1824.6 | 1820.5 | 1820.5  | 1819.3 |
| gdb 2377 | 1844.3 <sup>a</sup> | 1828.1 | 1828.1  | 1827.6 | 1823.7 | 1823.7  | 1822.5 |
| gdb 2378 | 1850.5 <sup>a</sup> | 1840.7 | 1840.7  | 1840.8 | 1838.5 | 1838.5  | 1836.4 |
| gdb 2379 | 1842.7 <sup>a</sup> | 1830.9 | 1830.9  | 1833.7 | 1831.8 | 1831.8  | 1832.6 |
| gdb 2380 | 1882.9 <sup>a</sup> | 1871.0 | 1871.0  | 1872.6 | 1870.3 | 1870.2  | 1873.9 |
| gdb 2381 | 1862.8 <sup>a</sup> | 1853.8 | 1853.8  | 1855.7 | 1855.4 | 1855.3  | 1858.0 |
| gdb 2382 | 1865.7 <sup>a</sup> | 1855.5 | 1855.4  | 1857.6 | 1857.4 | 1857.2  | 1859.8 |
| gdb 2383 | 1873.5 <sup>a</sup> | 1869.2 | 1869.2  | 1872.0 | 1873.4 | 1873.3  | 1875.1 |
| gdb 2384 | 1879.1 <sup>a</sup> | 1878.4 | 1878.4  | 1881.0 | 1872.3 | 1872.3  | 1876.2 |
| gdb 2385 | 1886.8 <sup>a</sup> | 1885.8 | 1885.8  | 1888.4 | 1883.2 | 1883.1  | 1885.4 |
| gdb 2386 | 1902.3 <sup>a</sup> | 1908.6 | 1908.6  | 1910.1 | 1907.6 | 1907.6  | 1909.5 |
| gdb 2387 | 1918.4 <sup>a</sup> | 1922.8 | 1922.8  | 1924.1 | 1919.8 | 1919.8  | 1922.4 |
| gdb 2388 | 1915.9 <sup>a</sup> | 1920.2 | 1920.2  | 1922.1 | 1917.2 | 1917.2  | 1920.2 |
| gdb 2389 | 1900.1 <sup>a</sup> | 1906.7 | 1906.7  | 1908.2 | 1905.6 | 1905.6  | 1907.8 |
| gdb 2390 | 1904.8 <sup>a</sup> | 1919.1 | 1919.1  | 1921.3 | 1920.4 | 1920.4  | 1921.3 |
| gdb 2391 | 1875.9 <sup>a</sup> | 1870.7 | 1870.7  | 1870.1 | 1863.1 | 1863.1  | 1862.3 |
| gdb 2392 | 1875.3 <sup>a</sup> | 1870.4 | 1870.4  | 1869.6 | 1862.5 | 1862.5  | 1861.3 |
| gdb 2393 | 1870.3 <sup>a</sup> | 1869.2 | 1869.2  | 1872.8 | 1864.3 | 1864.3  | 1867.5 |
| gdb 2394 | 1882.0 <sup>a</sup> | 1883.9 | 1883.9  | 1883.8 | 1878.6 | 1878.5  | 1876.0 |
| gdb 2395 | 1875.1 <sup>a</sup> | 1881.2 | 1881.2  | 1885.3 | 1878.7 | 1878.7  | 1880.8 |
| gdb 2396 | 1877.8 <sup>a</sup> | 1877.3 | 1877.3  | 1880.0 | 1875.0 | 1874.9  | 1876.3 |
| gdb 2397 | 1852.3 <sup>a</sup> | 1847.7 | 1847.7  | 1847.5 | 1839.8 | 1839.8  | 1838.9 |
| gdb 2398 | 1852.7 <sup>a</sup> | 1847.9 | 1847.9  | 1847.5 | 1839.8 | 1839.8  | 1838.5 |
| gdb 2399 | 1851.5 <sup>a</sup> | 1842.6 | 1842.6  | 1845.8 | 1838.7 | 1838.7  | 1840.7 |
| gdb 2400 | 1858.5 <sup>a</sup> | 1860.9 | 1860.9  | 1861.5 | 1855.1 | 1855.1  | 1852.9 |
| gdb 2401 | 1857.0 <sup>a</sup> | 1855.0 | 1854.9  | 1858.7 | 1853.4 | 1853.4  | 1854.2 |
| gdb 2402 | 1855.8 <sup>a</sup> | 1856.0 | 1855.9  | 1859.3 | 1852.9 | 1852.9  | 1854.3 |

... continued on next page ...

Table S73: ... continued from previous page ...

| Species  | Ref.                | OM2    | OM2-D3T | ODM2   | OM3    | OM3-D3T | ODM3   |
|----------|---------------------|--------|---------|--------|--------|---------|--------|
| gdb 2403 | 1870.9 <sup>a</sup> | 1872.2 | 1872.2  | 1874.9 | 1870.4 | 1870.4  | 1873.4 |
| gdb 2404 | 1871.5 <sup>a</sup> | 1874.0 | 1874.0  | 1874.0 | 1876.6 | 1872.2  | 1875.5 |
| gdb 2405 | 1875.3 <sup>a</sup> | 1876.3 | 1876.3  | 1879.0 | 1874.7 | 1874.7  | 1877.6 |
| gdb 2406 | 1880.2 <sup>a</sup> | 1889.0 | 1889.0  | 1892.6 | 1888.5 | 1888.4  | 1890.2 |
| gdb 2407 | 1888.3 <sup>a</sup> | 1886.7 | 1886.7  | 1889.7 | 1884.6 | 1884.5  | 1887.0 |
| gdb 2408 | 1913.7 <sup>a</sup> | 1916.8 | 1916.8  | 1918.4 | 1913.3 | 1913.3  | 1916.0 |
| gdb 2409 | 1895.4 <sup>a</sup> | 1908.7 | 1908.7  | 1911.6 | 1906.5 | 1906.5  | 1909.1 |
| gdb 2410 | 1900.2 <sup>a</sup> | 1904.1 | 1904.1  | 1905.6 | 1902.7 | 1902.7  | 1904.4 |
| gdb 2411 | 1898.9 <sup>a</sup> | 1902.7 | 1902.7  | 1904.0 | 1901.2 | 1901.2  | 1902.4 |
| gdb 2412 | 1904.8 <sup>a</sup> | 1915.4 | 1915.4  | 1917.6 | 1916.3 | 1916.3  | 1916.4 |
| gdb 2413 | 1879.5 <sup>a</sup> | 1877.9 | 1877.8  | 1881.5 | 1871.7 | 1871.6  | 1875.8 |
| gdb 2414 | 1882.1 <sup>a</sup> | 1889.1 | 1889.1  | 1892.4 | 1885.3 | 1885.3  | 1888.3 |
| gdb 2415 | 1885.4 <sup>a</sup> | 1885.3 | 1885.3  | 1888.2 | 1882.6 | 1882.6  | 1884.8 |
| gdb 2416 | 1863.8 <sup>a</sup> | 1849.5 | 1849.5  | 1851.9 | 1848.0 | 1848.0  | 1847.6 |
| gdb 2417 | 1856.5 <sup>a</sup> | 1843.8 | 1843.8  | 1845.8 | 1838.7 | 1838.7  | 1839.5 |
| gdb 2418 | 1868.8 <sup>a</sup> | 1851.5 | 1851.5  | 1856.1 | 1850.1 | 1850.1  | 1853.0 |
| gdb 2419 | 1874.3 <sup>a</sup> | 1856.8 | 1856.8  | 1862.1 | 1858.8 | 1858.8  | 1861.0 |
| gdb 2420 | 1873.5 <sup>a</sup> | 1870.8 | 1870.8  | 1873.6 | 1869.4 | 1869.4  | 1871.2 |
| gdb 2421 | 1873.2 <sup>a</sup> | 1861.5 | 1861.5  | 1864.2 | 1861.9 | 1861.9  | 1863.2 |
| gdb 2422 | 1866.4 <sup>a</sup> | 1854.6 | 1854.6  | 1857.3 | 1851.3 | 1851.3  | 1854.0 |
| gdb 2423 | 1874.6 <sup>a</sup> | 1869.2 | 1869.2  | 1872.6 | 1867.5 | 1867.5  | 1869.8 |
| gdb 2424 | 1878.8 <sup>a</sup> | 1876.0 | 1876.0  | 1879.4 | 1877.9 | 1877.9  | 1878.7 |
| gdb 2425 | 1885.9 <sup>a</sup> | 1890.7 | 1890.7  | 1893.3 | 1885.8 | 1885.8  | 1888.8 |
| gdb 2426 | 1878.8 <sup>a</sup> | 1881.4 | 1881.4  | 1884.9 | 1876.7 | 1876.7  | 1880.7 |
| gdb 2427 | 1894.5 <sup>a</sup> | 1902.3 | 1902.3  | 1903.2 | 1894.6 | 1894.5  | 1897.5 |
| gdb 2428 | 1889.8 <sup>a</sup> | 1893.7 | 1893.7  | 1896.8 | 1891.9 | 1891.9  | 1893.7 |
| gdb 2429 | 1882.9 <sup>a</sup> | 1879.2 | 1879.2  | 1881.5 | 1872.7 | 1872.7  | 1875.0 |
| gdb 2430 | 1882.1 <sup>a</sup> | 1876.6 | 1876.6  | 1880.0 | 1869.6 | 1869.6  | 1872.4 |
| gdb 2431 | 1883.9 <sup>a</sup> | 1878.6 | 1878.6  | 1882.9 | 1872.0 | 1872.0  | 1875.8 |
| gdb 2432 | 1890.4 <sup>a</sup> | 1887.5 | 1887.5  | 1890.2 | 1878.9 | 1878.9  | 1883.0 |
| gdb 2433 | 1887.3 <sup>a</sup> | 1882.8 | 1882.8  | 1885.7 | 1879.2 | 1879.2  | 1880.5 |
| gdb 2434 | 1888.8 <sup>a</sup> | 1882.4 | 1882.4  | 1887.5 | 1879.0 | 1879.0  | 1882.8 |
| gdb 2435 | 1878.2 <sup>a</sup> | 1871.4 | 1871.4  | 1876.0 | 1865.9 | 1865.9  | 1870.2 |
| gdb 2436 | 1880.3 <sup>a</sup> | 1873.8 | 1873.8  | 1877.9 | 1868.6 | 1868.6  | 1872.5 |
| gdb 2437 | 1890.3 <sup>a</sup> | 1880.7 | 1880.7  | 1885.5 | 1878.6 | 1878.6  | 1881.6 |
| gdb 2438 | 1888.0 <sup>a</sup> | 1879.2 | 1879.2  | 1883.9 | 1876.5 | 1876.5  | 1879.7 |
| gdb 2439 | 1871.3 <sup>a</sup> | 1866.8 | 1866.7  | 1869.9 | 1865.8 | 1865.8  | 1867.8 |
| gdb 2440 | 1870.6 <sup>a</sup> | 1858.0 | 1858.0  | 1860.4 | 1858.7 | 1858.7  | 1860.0 |
| gdb 2441 | 1870.1 <sup>a</sup> | 1857.5 | 1857.5  | 1860.1 | 1858.0 | 1857.9  | 1859.3 |
| gdb 2442 | 1871.2 <sup>a</sup> | 1866.0 | 1866.0  | 1869.5 | 1865.0 | 1865.0  | 1867.3 |
| gdb 2443 | 1872.2 <sup>a</sup> | 1863.3 | 1863.3  | 1866.6 | 1863.1 | 1863.1  | 1865.6 |
| gdb 2444 | 1863.4 <sup>a</sup> | 1850.9 | 1850.9  | 1853.2 | 1847.8 | 1847.8  | 1850.7 |
| gdb 2445 | 1876.5 <sup>a</sup> | 1868.8 | 1868.8  | 1872.2 | 1872.6 | 1872.6  | 1873.4 |
| gdb 2446 | 1889.0 <sup>a</sup> | 1886.9 | 1886.9  | 1889.3 | 1880.5 | 1880.5  | 1883.8 |
| gdb 2447 | 1891.9 <sup>a</sup> | 1891.7 | 1891.7  | 1894.3 | 1884.3 | 1884.3  | 1888.8 |
| gdb 2448 | 1885.4 <sup>a</sup> | 1882.0 | 1882.0  | 1885.0 | 1878.0 | 1878.0  | 1881.5 |
| gdb 2449 | 1894.0 <sup>a</sup> | 1890.4 | 1890.4  | 1893.2 | 1890.2 | 1890.2  | 1891.8 |
| gdb 2450 | 1894.0 <sup>a</sup> | 1893.3 | 1893.3  | 1896.3 | 1892.0 | 1892.0  | 1894.4 |
| gdb 2451 | 1880.8 <sup>a</sup> | 1877.4 | 1877.4  | 1880.2 | 1870.7 | 1870.7  | 1873.2 |
| gdb 2452 | 1886.1 <sup>a</sup> | 1883.6 | 1883.6  | 1886.9 | 1874.3 | 1874.3  | 1878.9 |
| gdb 2453 | 1884.1 <sup>a</sup> | 1879.5 | 1879.5  | 1882.2 | 1872.6 | 1872.6  | 1874.8 |
| gdb 2454 | 1882.9 <sup>a</sup> | 1878.6 | 1878.6  | 1882.4 | 1872.0 | 1872.0  | 1875.6 |
| gdb 2455 | 1888.7 <sup>a</sup> | 1884.9 | 1884.9  | 1887.7 | 1881.6 | 1881.6  | 1882.3 |
| gdb 2456 | 1887.8 <sup>a</sup> | 1884.9 | 1884.9  | 1889.1 | 1881.5 | 1881.5  | 1884.0 |
| gdb 2457 | 1887.3 <sup>a</sup> | 1883.9 | 1883.9  | 1888.4 | 1880.5 | 1880.5  | 1883.9 |
| gdb 2458 | 1884.1 <sup>a</sup> | 1887.4 | 1887.4  | 1890.3 | 1882.8 | 1882.8  | 1886.2 |
| gdb 2459 | 1891.6 <sup>a</sup> | 1897.1 | 1897.1  | 1898.6 | 1889.4 | 1889.4  | 1893.1 |
| gdb 2460 | 1881.3 <sup>a</sup> | 1882.0 | 1882.0  | 1884.9 | 1878.1 | 1878.1  | 1881.6 |
| gdb 2461 | 1886.2 <sup>a</sup> | 1888.7 | 1888.7  | 1891.4 | 1884.6 | 1884.6  | 1887.9 |
| gdb 2462 | 1888.6 <sup>a</sup> | 1889.9 | 1889.9  | 1892.8 | 1889.8 | 1889.8  | 1891.7 |
| gdb 2463 | 1891.3 <sup>a</sup> | 1895.2 | 1895.2  | 1897.8 | 1894.5 | 1894.5  | 1896.4 |
| gdb 2464 | 1890.3 <sup>a</sup> | 1893.8 | 1893.8  | 1896.2 | 1893.1 | 1893.1  | 1894.7 |
| gdb 2465 | 1836.2 <sup>a</sup> | 1825.8 | 1825.8  | 1826.9 | 1819.8 | 1819.8  | 1820.5 |
| gdb 2466 | 1831.9 <sup>a</sup> | 1818.1 | 1818.1  | 1820.8 | 1814.3 | 1814.3  | 1815.1 |
| gdb 2467 | 1840.1 <sup>a</sup> | 1824.2 | 1824.2  | 1828.6 | 1818.2 | 1818.2  | 1822.8 |

... continued on next page ...

Table S73: ... continued from previous page ...

| Species  | Ref.                | OM2    | OM2-D3T | ODM2   | OM3    | OM3-D3T | ODM3   |
|----------|---------------------|--------|---------|--------|--------|---------|--------|
| gdb 2468 | 1849.2 <sup>a</sup> | 1837.5 | 1837.5  | 1839.2 | 1835.2 | 1835.2  | 1834.1 |
| gdb 2469 | 1847.2 <sup>a</sup> | 1830.3 | 1830.3  | 1830.3 | 1835.6 | 1830.1  | 1833.4 |
| gdb 2470 | 1845.9 <sup>a</sup> | 1830.7 | 1830.7  | 1835.1 | 1829.9 | 1829.9  | 1833.1 |
| gdb 2471 | 1886.6 <sup>a</sup> | 1893.7 | 1893.7  | 1896.7 | 1887.9 | 1887.9  | 1891.8 |
| gdb 2472 | 1893.4 <sup>a</sup> | 1897.9 | 1897.9  | 1900.3 | 1890.9 | 1890.9  | 1894.8 |
| gdb 2473 | 1895.6 <sup>a</sup> | 1902.7 | 1902.7  | 1905.4 | 1900.4 | 1900.4  | 1902.6 |
| gdb 2474 | 1869.6 <sup>a</sup> | 1867.8 | 1867.8  | 1868.2 | 1859.7 | 1859.7  | 1859.0 |
| gdb 2475 | 1864.0 <sup>a</sup> | 1863.3 | 1863.3  | 1863.2 | 1855.5 | 1855.5  | 1855.0 |
| gdb 2476 | 1872.0 <sup>a</sup> | 1870.2 | 1870.2  | 1869.9 | 1862.2 | 1862.2  | 1861.1 |
| gdb 2477 | 1874.5 <sup>a</sup> | 1876.5 | 1876.5  | 1879.1 | 1867.6 | 1867.6  | 1871.1 |
| gdb 2478 | 1879.5 <sup>a</sup> | 1876.3 | 1876.2  | 1876.3 | 1871.6 | 1871.6  | 1869.1 |
| gdb 2479 | 1877.5 <sup>a</sup> | 1877.4 | 1877.4  | 1881.2 | 1874.9 | 1874.8  | 1876.6 |
| gdb 2480 | 1876.3 <sup>a</sup> | 1874.9 | 1874.9  | 1878.4 | 1872.5 | 1872.5  | 1874.5 |
| gdb 2481 | 1888.3 <sup>a</sup> | 1891.9 | 1891.9  | 1893.6 | 1891.3 | 1891.2  | 1893.2 |
| gdb 2482 | 1891.6 <sup>a</sup> | 1894.2 | 1894.1  | 1895.8 | 1893.3 | 1893.3  | 1895.4 |
| gdb 2483 | 1891.2 <sup>a</sup> | 1894.1 | 1894.1  | 1895.6 | 1893.9 | 1893.9  | 1895.6 |
| gdb 2484 | 1897.2 <sup>a</sup> | 1897.8 | 1897.8  | 1899.3 | 1901.6 | 1901.6  | 1902.1 |
| gdb 2485 | 1901.6 <sup>a</sup> | 1910.7 | 1910.7  | 1912.8 | 1901.3 | 1901.3  | 1905.5 |
| gdb 2486 | 1901.2 <sup>a</sup> | 1910.1 | 1910.1  | 1913.4 | 1906.7 | 1906.6  | 1909.2 |
| gdb 2487 | 1899.7 <sup>a</sup> | 1908.1 | 1908.1  | 1911.3 | 1905.1 | 1905.1  | 1907.8 |
| gdb 2488 | 1923.4 <sup>a</sup> | 1911.5 | 1911.5  | 1912.6 | 1909.8 | 1909.8  | 1911.8 |
| gdb 2489 | 1899.0 <sup>a</sup> | 1907.9 | 1907.9  | 1910.8 | 1906.3 | 1906.3  | 1909.0 |
| gdb 2490 | 1898.4 <sup>a</sup> | 1905.4 | 1905.4  | 1908.0 | 1903.9 | 1903.9  | 1906.7 |
| gdb 2491 | 1899.0 <sup>a</sup> | 1908.2 | 1908.2  | 1910.2 | 1906.3 | 1906.3  | 1908.0 |
| gdb 2492 | 1905.1 <sup>a</sup> | 1912.6 | 1912.6  | 1915.6 | 1914.4 | 1914.4  | 1914.9 |
| gdb 2493 | 1901.8 <sup>a</sup> | 1910.6 | 1910.6  | 1912.6 | 1901.2 | 1901.2  | 1905.4 |
| gdb 2494 | 1902.7 <sup>a</sup> | 1911.0 | 1911.0  | 1914.2 | 1907.9 | 1907.9  | 1910.2 |
| gdb 2495 | 1901.4 <sup>a</sup> | 1908.2 | 1908.2  | 1911.2 | 1905.1 | 1905.1  | 1907.5 |
| gdb 2496 | 1852.3 <sup>a</sup> | 1840.3 | 1840.3  | 1843.1 | 1834.8 | 1834.8  | 1836.2 |
| gdb 2497 | 1849.6 <sup>a</sup> | 1838.7 | 1838.7  | 1840.8 | 1834.0 | 1834.0  | 1835.8 |
| gdb 2498 | 1853.5 <sup>a</sup> | 1843.0 | 1843.0  | 1844.9 | 1837.7 | 1837.7  | 1838.6 |
| gdb 2499 | 1863.2 <sup>a</sup> | 1848.1 | 1848.1  | 1852.5 | 1840.7 | 1840.7  | 1847.0 |
| gdb 2500 | 1863.5 <sup>a</sup> | 1850.9 | 1850.9  | 1852.7 | 1849.3 | 1849.3  | 1848.2 |
| gdb 2501 | 1866.1 <sup>a</sup> | 1850.0 | 1850.0  | 1855.7 | 1848.8 | 1848.8  | 1852.9 |
| gdb 2502 | 1862.5 <sup>a</sup> | 1847.4 | 1847.4  | 1852.6 | 1846.7 | 1846.7  | 1850.6 |
| gdb 2503 | 1860.5 <sup>a</sup> | 1849.0 | 1849.0  | 1852.1 | 1845.3 | 1845.3  | 1849.2 |
| gdb 2504 | 1863.8 <sup>a</sup> | 1850.9 | 1850.9  | 1853.8 | 1848.2 | 1848.2  | 1851.9 |
| gdb 2505 | 1871.0 <sup>a</sup> | 1866.5 | 1866.5  | 1869.4 | 1859.6 | 1859.6  | 1865.0 |
| gdb 2506 | 1870.8 <sup>a</sup> | 1858.4 | 1858.4  | 1861.3 | 1858.7 | 1858.6  | 1860.3 |
| gdb 2507 | 1869.9 <sup>a</sup> | 1864.3 | 1864.3  | 1867.9 | 1863.8 | 1863.8  | 1866.4 |
| gdb 2508 | 1867.8 <sup>a</sup> | 1864.0 | 1864.0  | 1867.4 | 1863.1 | 1863.1  | 1865.7 |
| gdb 2509 | 1905.4 <sup>a</sup> | 1912.2 | 1912.2  | 1913.3 | 1909.4 | 1909.4  | 1911.2 |
| gdb 2510 | 1921.7 <sup>a</sup> | 1920.4 | 1920.4  | 1920.9 | 1916.9 | 1916.9  | 1919.2 |
| gdb 2511 | 1899.3 <sup>a</sup> | 1908.4 | 1908.4  | 1909.9 | 1906.3 | 1906.3  | 1908.4 |
| gdb 2512 | 1890.6 <sup>a</sup> | 1900.8 | 1900.8  | 1901.3 | 1890.8 | 1890.8  | 1892.9 |
| gdb 2513 | 1918.0 <sup>a</sup> | 1919.8 | 1919.8  | 1920.4 | 1917.1 | 1917.1  | 1920.0 |
| gdb 2514 | 1894.8 <sup>a</sup> | 1903.0 | 1903.0  | 1904.7 | 1902.6 | 1902.5  | 1905.1 |
| gdb 2515 | 1872.8 <sup>a</sup> | 1874.8 | 1874.8  | 1873.5 | 1867.5 | 1867.4  | 1866.1 |
| gdb 2516 | 1900.3 <sup>a</sup> | 1903.8 | 1904.1  | 1905.2 | 1902.4 | 1902.4  | 1904.9 |
| gdb 2517 | 1900.0 <sup>a</sup> | 1904.2 | 1904.2  | 1905.2 | 1902.3 | 1902.3  | 1904.8 |
| gdb 2518 | 1868.9 <sup>a</sup> | 1865.8 | 1865.8  | 1868.2 | 1860.7 | 1860.7  | 1864.0 |
| gdb 2519 | 1891.4 <sup>a</sup> | 1895.3 | 1895.3  | 1897.3 | 1888.9 | 1888.9  | 1892.6 |
| gdb 2520 | 1885.4 <sup>a</sup> | 1892.8 | 1892.8  | 1895.4 | 1888.1 | 1888.0  | 1891.4 |
| gdb 2521 | 1919.6 <sup>a</sup> | 1924.6 | 1924.6  | 1925.9 | 1924.9 | 1924.9  | 1924.8 |
| gdb 2522 | 1918.4 <sup>a</sup> | 1924.3 | 1924.3  | 1925.8 | 1924.7 | 1924.7  | 1925.3 |
| gdb 2523 | 1930.7 <sup>a</sup> | 1926.4 | 1926.4  | 1927.3 | 1922.9 | 1922.9  | 1925.3 |
| gdb 2524 | 1899.5 <sup>a</sup> | 1905.3 | 1905.3  | 1906.7 | 1903.7 | 1903.7  | 1906.0 |
| gdb 2525 | 1899.4 <sup>a</sup> | 1903.5 | 1903.5  | 1904.6 | 1902.0 | 1902.0  | 1903.8 |
| gdb 2526 | 1913.7 <sup>a</sup> | 1911.2 | 1911.2  | 1911.8 | 1908.8 | 1908.8  | 1911.4 |
| gdb 2527 | 1914.0 <sup>a</sup> | 1921.9 | 1921.9  | 1922.9 | 1922.3 | 1922.2  | 1922.4 |
| gdb 2528 | 1887.7 <sup>a</sup> | 1887.4 | 1887.4  | 1885.9 | 1881.0 | 1881.0  | 1877.9 |
| gdb 2529 | 1930.4 <sup>a</sup> | 1925.5 | 1925.5  | 1926.2 | 1922.2 | 1922.2  | 1924.3 |
| gdb 2530 | 1917.9 <sup>a</sup> | 1922.8 | 1922.8  | 1924.1 | 1923.4 | 1923.4  | 1923.8 |
| gdb 2531 | 1900.4 <sup>a</sup> | 1909.7 | 1909.7  | 1911.1 | 1906.8 | 1906.8  | 1908.8 |
| gdb 2532 | 1909.0 <sup>a</sup> | 1914.1 | 1914.1  | 1915.2 | 1914.5 | 1914.5  | 1914.8 |

... continued on next page ...

Table S73: ... continued from previous page ...

| Species  | Ref.                | OM2    | OM2-D3T | ODM2   | OM3    | OM3-D3T | ODM3   |
|----------|---------------------|--------|---------|--------|--------|---------|--------|
| gdb 2533 | 1874.0 <sup>a</sup> | 1876.0 | 1876.0  | 1874.7 | 1868.4 | 1868.4  | 1866.8 |
| gdb 2534 | 1916.2 <sup>a</sup> | 1913.7 | 1913.3  | 1913.8 | 1911.1 | 1911.0  | 1914.1 |
| gdb 2535 | 1896.0 <sup>a</sup> | 1904.4 | 1904.4  | 1906.0 | 1903.7 | 1903.7  | 1906.3 |
| gdb 2536 | 1897.0 <sup>a</sup> | 1902.4 | 1902.4  | 1904.0 | 1900.7 | 1900.6  | 1903.8 |
| gdb 2537 | 1897.8 <sup>a</sup> | 1904.2 | 1904.2  | 1905.3 | 1902.6 | 1902.6  | 1905.3 |
| gdb 2538 | 1876.8 <sup>a</sup> | 1873.3 | 1873.3  | 1877.6 | 1873.7 | 1873.7  | 1875.4 |
| gdb 2539 | 1888.5 <sup>a</sup> | 1885.4 | 1885.4  | 1888.0 | 1888.7 | 1888.7  | 1889.4 |
| gdb 2540 | 1878.1 <sup>a</sup> | 1878.1 | 1878.1  | 1880.5 | 1877.4 | 1877.4  | 1879.7 |
| gdb 2541 | 1893.1 <sup>a</sup> | 1902.2 | 1902.2  | 1902.6 | 1891.9 | 1891.8  | 1894.0 |
| gdb 2542 | 1894.3 <sup>a</sup> | 1903.5 | 1903.5  | 1903.7 | 1893.6 | 1893.6  | 1895.6 |
| gdb 2543 | 1892.7 <sup>a</sup> | 1897.0 | 1897.0  | 1900.1 | 1893.3 | 1893.3  | 1895.8 |
| gdb 2544 | 1889.7 <sup>a</sup> | 1889.3 | 1889.3  | 1892.0 | 1886.3 | 1886.2  | 1888.1 |
| gdb 2545 | 1877.8 <sup>a</sup> | 1875.4 | 1875.4  | 1874.2 | 1867.2 | 1867.2  | 1866.3 |
| gdb 2546 | 1877.0 <sup>a</sup> | 1879.2 | 1879.2  | 1881.6 | 1873.4 | 1873.4  | 1876.6 |
| gdb 2547 | 1869.5 <sup>a</sup> | 1871.5 | 1871.5  | 1872.5 | 1867.2 | 1867.2  | 1866.8 |
| gdb 2548 | 1892.6 <sup>a</sup> | 1897.5 | 1897.5  | 1900.3 | 1888.5 | 1888.5  | 1893.9 |
| gdb 2549 | 1896.2 <sup>a</sup> | 1902.2 | 1902.2  | 1904.4 | 1892.9 | 1892.9  | 1897.2 |
| gdb 2550 | 1890.0 <sup>a</sup> | 1894.5 | 1894.5  | 1897.5 | 1888.2 | 1888.2  | 1892.0 |
| gdb 2551 | 1896.1 <sup>a</sup> | 1902.3 | 1902.3  | 1904.5 | 1893.0 | 1893.0  | 1897.4 |
| gdb 2552 | 1888.0 <sup>a</sup> | 1887.1 | 1887.0  | 1885.9 | 1880.6 | 1880.6  | 1878.0 |
| gdb 2553 | 1870.2 <sup>a</sup> | 1869.8 | 1869.8  | 1869.4 | 1862.3 | 1862.3  | 1862.3 |
| gdb 2554 | 1901.4 <sup>a</sup> | 1908.3 | 1908.3  | 1910.5 | 1899.4 | 1899.4  | 1903.1 |
| gdb 2555 | 1900.0 <sup>a</sup> | 1907.6 | 1907.6  | 1909.6 | 1898.3 | 1898.3  | 1901.9 |
| gdb 2556 | 1893.1 <sup>a</sup> | 1897.0 | 1897.0  | 1900.2 | 1893.3 | 1893.3  | 1895.8 |
| gdb 2557 | 1894.8 <sup>a</sup> | 1903.6 | 1903.6  | 1904.0 | 1893.6 | 1893.6  | 1895.7 |
| gdb 2558 | 1893.1 <sup>a</sup> | 1902.1 | 1902.1  | 1902.6 | 1891.6 | 1891.6  | 1894.0 |
| gdb 2559 | 1889.7 <sup>a</sup> | 1898.7 | 1898.7  | 1901.5 | 1892.2 | 1892.1  | 1895.9 |
| gdb 2560 | 1895.2 <sup>a</sup> | 1905.2 | 1905.2  | 1907.3 | 1896.1 | 1896.1  | 1900.7 |
| gdb 2561 | 1895.2 <sup>a</sup> | 1905.2 | 1905.2  | 1907.3 | 1896.2 | 1896.1  | 1901.0 |
| gdb 2562 | 1887.9 <sup>a</sup> | 1888.3 | 1888.3  | 1891.2 | 1885.6 | 1885.6  | 1887.8 |
| gdb 2563 | 1877.0 <sup>a</sup> | 1876.2 | 1876.2  | 1879.4 | 1870.8 | 1870.8  | 1874.8 |
| gdb 2564 | 1900.7 <sup>a</sup> | 1908.9 | 1908.9  | 1911.0 | 1900.7 | 1900.6  | 1904.5 |
| gdb 2565 | 1914.4 <sup>a</sup> | 1922.1 | 1922.1  | 1923.3 | 1922.2 | 1922.2  | 1922.4 |
| gdb 2566 | 1899.1 <sup>a</sup> | 1905.8 | 1905.8  | 1907.5 | 1904.2 | 1904.1  | 1906.7 |
| gdb 2567 | 1908.7 <sup>a</sup> | 1910.1 | 1910.1  | 1911.4 | 1907.6 | 1907.6  | 1911.2 |
| gdb 2568 | 1918.8 <sup>a</sup> | 1923.1 | 1923.1  | 1924.4 | 1923.3 | 1923.3  | 1923.1 |
| gdb 2569 | 1908.6 <sup>a</sup> | 1915.1 | 1915.1  | 1916.6 | 1915.7 | 1915.7  | 1916.3 |
| gdb 2570 | 1897.6 <sup>a</sup> | 1903.8 | 1903.8  | 1905.0 | 1902.1 | 1902.1  | 1904.9 |
| gdb 2571 | 1916.4 <sup>a</sup> | 1914.2 | 1914.1  | 1914.8 | 1912.1 | 1912.1  | 1915.2 |
| gdb 2572 | 1889.0 <sup>a</sup> | 1885.8 | 1885.8  | 1888.4 | 1889.0 | 1889.0  | 1889.6 |
| gdb 2573 | 1887.7 <sup>a</sup> | 1888.2 | 1888.2  | 1891.1 | 1885.4 | 1885.4  | 1887.5 |
| gdb 2574 | 1889.1 <sup>a</sup> | 1888.5 | 1888.5  | 1891.4 | 1885.4 | 1885.4  | 1887.4 |
| gdb 2575 | 1899.9 <sup>a</sup> | 1907.9 | 1907.9  | 1909.9 | 1898.4 | 1898.4  | 1901.9 |
| gdb 2576 | 1901.1 <sup>a</sup> | 1908.3 | 1908.3  | 1910.6 | 1899.2 | 1899.2  | 1903.0 |
| gdb 2577 | 1900.7 <sup>a</sup> | 1908.8 | 1908.8  | 1911.0 | 1900.5 | 1900.4  | 1904.4 |
| gdb 2578 | 1908.8 <sup>a</sup> | 1910.1 | 1910.1  | 1910.5 | 1907.2 | 1907.1  | 1910.1 |
| gdb 2579 | 1913.3 <sup>a</sup> | 1911.6 | 1911.6  | 1912.2 | 1909.4 | 1909.4  | 1912.3 |
| gdb 2580 | 1897.8 <sup>a</sup> | 1903.9 | 1903.9  | 1905.0 | 1902.4 | 1902.4  | 1905.2 |
| gdb 2581 | 1909.4 <sup>a</sup> | 1914.2 | 1914.1  | 1915.5 | 1914.2 | 1914.2  | 1914.7 |
| gdb 2582 | 1900.8 <sup>a</sup> | 1910.1 | 1910.1  | 1911.8 | 1906.9 | 1906.8  | 1909.1 |
| gdb 2583 | 1877.4 <sup>a</sup> | 1879.0 | 1879.0  | 1881.7 | 1873.0 | 1873.0  | 1877.0 |
| gdb 2584 | 1874.4 <sup>a</sup> | 1876.3 | 1876.3  | 1875.4 | 1868.4 | 1868.4  | 1867.1 |
| gdb 2585 | 1915.8 <sup>a</sup> | 1913.4 | 1913.4  | 1914.2 | 1910.9 | 1910.9  | 1914.1 |
| gdb 2586 | 1896.1 <sup>a</sup> | 1904.4 | 1904.4  | 1906.1 | 1903.5 | 1903.5  | 1906.2 |
| gdb 2587 | 1878.1 <sup>a</sup> | 1878.0 | 1878.0  | 1880.4 | 1877.2 | 1877.2  | 1879.5 |
| gdb 2588 | 1877.2 <sup>a</sup> | 1876.0 | 1876.0  | 1879.4 | 1870.7 | 1870.6  | 1874.7 |
| gdb 2589 | 1908.8 <sup>a</sup> | 1910.0 | 1909.9  | 1911.3 | 1907.4 | 1907.4  | 1911.1 |
| gdb 2590 | 1899.0 <sup>a</sup> | 1905.9 | 1905.9  | 1907.6 | 1904.5 | 1904.5  | 1907.1 |
| gdb 2591 | 1877.1 <sup>a</sup> | 1874.6 | 1874.6  | 1873.3 | 1866.3 | 1866.2  | 1865.4 |
| gdb 2592 | 1896.8 <sup>a</sup> | 1903.9 | 1903.9  | 1905.3 | 1901.7 | 1901.7  | 1904.6 |
| gdb 2593 | 1897.2 <sup>a</sup> | 1902.5 | 1902.5  | 1904.2 | 1900.8 | 1900.7  | 1904.1 |
| gdb 2594 | 1870.6 <sup>a</sup> | 1868.0 | 1868.0  | 1866.8 | 1861.3 | 1861.3  | 1860.8 |
| gdb 2595 | 1912.2 <sup>a</sup> | 1911.1 | 1911.1  | 1911.7 | 1908.1 | 1908.1  | 1910.5 |
| gdb 2596 | 1897.9 <sup>a</sup> | 1904.2 | 1904.2  | 1905.9 | 1902.2 | 1902.2  | 1904.6 |
| gdb 2597 | 1898.5 <sup>a</sup> | 1905.1 | 1905.0  | 1906.7 | 1903.0 | 1903.0  | 1905.5 |

... continued on next page ...

Table S73: ... continued from previous page ...

| Species  | Ref.                | OM2    | OM2-D3T | ODM2   | OM3    | OM3-D3T | ODM3   |
|----------|---------------------|--------|---------|--------|--------|---------|--------|
| gdb 2598 | 1878.1 <sup>a</sup> | 1881.1 | 1881.1  | 1879.7 | 1877.8 | 1877.8  | 1875.2 |
| gdb 2599 | 1881.0 <sup>a</sup> | 1886.6 | 1886.6  | 1889.2 | 1888.2 | 1888.2  | 1888.3 |
| gdb 2600 | 1887.1 <sup>a</sup> | 1881.1 | 1881.1  | 1882.0 | 1883.4 | 1883.4  | 1883.1 |
| gdb 2601 | 1885.4 <sup>a</sup> | 1878.9 | 1878.9  | 1881.0 | 1883.0 | 1883.0  | 1883.3 |
| gdb 2602 | 1883.2 <sup>a</sup> | 1877.4 | 1877.4  | 1875.7 | 1874.7 | 1874.7  | 1871.6 |
| gdb 2603 | 1885.6 <sup>a</sup> | 1878.1 | 1878.1  | 1879.7 | 1881.9 | 1881.9  | 1881.8 |
| gdb 2604 | 1899.2 <sup>a</sup> | 1894.9 | 1894.9  | 1897.4 | 1895.6 | 1895.6  | 1897.1 |
| gdb 2605 | 1892.7 <sup>a</sup> | 1890.0 | 1890.0  | 1891.1 | 1887.2 | 1887.2  | 1887.6 |
| gdb 2606 | 1900.5 <sup>a</sup> | 1896.2 | 1896.2  | 1899.5 | 1897.1 | 1897.1  | 1899.1 |
| gdb 2607 | 1882.5 <sup>a</sup> | 1889.7 | 1889.7  | 1892.0 | 1890.0 | 1890.0  | 1891.0 |
| gdb 2608 | 1884.6 <sup>a</sup> | 1892.4 | 1892.4  | 1895.7 | 1893.2 | 1893.2  | 1894.5 |
| gdb 2609 | 1882.0 <sup>a</sup> | 1881.2 | 1881.1  | 1883.7 | 1879.8 | 1879.8  | 1882.2 |
| gdb 2610 | 1875.1 <sup>a</sup> | 1876.5 | 1876.5  | 1878.8 | 1874.6 | 1874.6  | 1876.8 |
| gdb 2611 | 1913.7 <sup>a</sup> | 1916.7 | 1916.6  | 1918.2 | 1916.0 | 1916.0  | 1916.9 |
| gdb 2612 | 1913.9 <sup>a</sup> | 1919.9 | 1919.9  | 1921.6 | 1919.2 | 1919.2  | 1920.1 |
| gdb 2613 | 1912.9 <sup>a</sup> | 1919.6 | 1919.6  | 1920.0 | 1920.9 | 1920.9  | 1920.9 |
| gdb 2614 | 1900.9 <sup>a</sup> | 1909.4 | 1909.4  | 1911.0 | 1911.2 | 1911.2  | 1913.0 |
| gdb 2615 | 1880.4 <sup>a</sup> | 1883.2 | 1883.2  | 1886.0 | 1882.3 | 1882.3  | 1884.7 |
| gdb 2616 | 1875.8 <sup>a</sup> | 1878.7 | 1878.7  | 1881.0 | 1877.8 | 1877.7  | 1880.5 |
| gdb 2617 | 1902.4 <sup>a</sup> | 1892.3 | 1892.3  | 1894.3 | 1890.5 | 1890.5  | 1892.8 |
| gdb 2618 | 1882.9 <sup>a</sup> | 1890.7 | 1890.7  | 1893.9 | 1891.6 | 1891.6  | 1892.6 |
| gdb 2619 | 1900.7 <sup>a</sup> | 1907.9 | 1907.9  | 1908.4 | 1909.3 | 1909.3  | 1908.9 |
| gdb 2620 | 1901.9 <sup>a</sup> | 1907.6 | 1907.6  | 1909.1 | 1910.5 | 1910.5  | 1910.7 |
| gdb 2621 | 1904.7 <sup>a</sup> | 1905.9 | 1905.9  | 1904.1 | 1902.6 | 1902.6  | 1900.2 |
| gdb 2622 | 1910.3 <sup>a</sup> | 1907.3 | 1907.3  | 1908.2 | 1905.3 | 1905.3  | 1907.4 |
| gdb 2623 | 1897.7 <sup>a</sup> | 1903.4 | 1903.4  | 1901.2 | 1900.1 | 1900.1  | 1897.2 |
| gdb 2624 | 1891.2 <sup>a</sup> | 1899.1 | 1899.1  | 1900.7 | 1899.4 | 1899.4  | 1900.6 |
| gdb 2625 | 1908.8 <sup>a</sup> | 1910.6 | 1910.6  | 1911.3 | 1907.9 | 1907.9  | 1909.6 |
| gdb 2626 | 1900.6 <sup>a</sup> | 1907.5 | 1907.5  | 1908.1 | 1909.2 | 1909.2  | 1908.4 |
| gdb 2627 | 1908.8 <sup>a</sup> | 1915.7 | 1915.7  | 1917.5 | 1916.1 | 1916.1  | 1916.3 |
| gdb 2628 | 1916.7 <sup>a</sup> | 1917.9 | 1917.9  | 1918.5 | 1914.3 | 1914.3  | 1917.2 |
| gdb 2629 | 1924.8 <sup>a</sup> | 1934.2 | 1934.2  | 1933.7 | 1936.1 | 1936.1  | 1935.7 |
| gdb 2630 | 1857.3 <sup>a</sup> | 1853.2 | 1853.2  | 1856.2 | 1854.2 | 1854.1  | 1855.0 |
| gdb 2631 | 1860.3 <sup>a</sup> | 1853.5 | 1853.5  | 1857.1 | 1854.7 | 1854.6  | 1855.7 |
| gdb 2632 | 1859.3 <sup>a</sup> | 1854.7 | 1854.7  | 1857.7 | 1856.0 | 1856.0  | 1856.6 |
| gdb 2633 | 1887.7 <sup>a</sup> | 1887.3 | 1887.3  | 1890.3 | 1888.5 | 1888.5  | 1889.2 |
| gdb 2634 | 1888.8 <sup>a</sup> | 1886.2 | 1886.1  | 1885.5 | 1880.9 | 1880.9  | 1878.3 |
| gdb 2635 | 1886.6 <sup>a</sup> | 1886.6 | 1886.6  | 1886.1 | 1881.7 | 1881.7  | 1879.0 |
| gdb 2636 | 1900.5 <sup>a</sup> | 1908.5 | 1908.5  | 1910.0 | 1911.0 | 1910.9  | 1912.4 |
| gdb 2637 | 1916.0 <sup>a</sup> | 1918.7 | 1918.7  | 1919.7 | 1919.4 | 1919.4  | 1919.5 |
| gdb 2638 | 1915.9 <sup>a</sup> | 1920.3 | 1920.3  | 1921.3 | 1921.2 | 1921.2  | 1921.5 |
| gdb 2639 | 1923.5 <sup>a</sup> | 1937.6 | 1937.6  | 1938.0 | 1940.4 | 1940.4  | 1940.8 |
| gdb 2640 | 1862.7 <sup>a</sup> | 1866.7 | 1866.7  | 1870.3 | 1865.5 | 1865.5  | 1867.1 |
| gdb 2641 | 1864.2 <sup>a</sup> | 1867.4 | 1867.4  | 1872.2 | 1866.2 | 1866.1  | 1867.9 |
| gdb 2642 | 1854.3 <sup>a</sup> | 1850.1 | 1850.1  | 1852.8 | 1852.7 | 1852.7  | 1853.7 |
| gdb 2643 | 1857.7 <sup>a</sup> | 1852.9 | 1852.9  | 1856.0 | 1855.9 | 1855.8  | 1856.7 |
| gdb 2644 | 1895.0 <sup>a</sup> | 1901.0 | 1901.0  | 1901.1 | 1902.5 | 1902.5  | 1903.0 |
| gdb 2645 | 1826.2 <sup>a</sup> | 1812.4 | 1812.4  | 1813.7 | 1813.1 | 1813.1  | 1812.3 |
| gdb 2646 | 1836.2 <sup>a</sup> | 1818.3 | 1818.3  | 1822.9 | 1823.9 | 1823.8  | 1825.7 |
| gdb 2647 | 1895.5 <sup>a</sup> | 1876.4 | 1876.4  | 1878.0 | 1877.8 | 1877.8  | 1880.2 |
| gdb 2648 | 1879.6 <sup>a</sup> | 1880.9 | 1880.9  | 1883.2 | 1885.2 | 1885.2  | 1886.4 |
| gdb 2649 | 1848.1 <sup>a</sup> | 1839.7 | 1839.7  | 1839.2 | 1837.5 | 1837.5  | 1835.2 |
| gdb 2650 | 1843.6 <sup>a</sup> | 1825.9 | 1825.9  | 1829.4 | 1828.8 | 1828.7  | 1829.8 |
| gdb 2651 | 1850.9 <sup>a</sup> | 1844.2 | 1844.2  | 1846.9 | 1848.2 | 1848.2  | 1848.4 |
| gdb 2652 | 1880.8 <sup>a</sup> | 1881.1 | 1881.1  | 1883.7 | 1884.1 | 1884.0  | 1885.2 |
| gdb 2653 | 1896.8 <sup>a</sup> | 1880.9 | 1880.9  | 1881.6 | 1880.1 | 1880.1  | 1881.7 |
| gdb 2654 | 1875.0 <sup>a</sup> | 1869.3 | 1869.3  | 1871.4 | 1870.6 | 1870.6  | 1871.8 |
| gdb 2655 | 1883.5 <sup>a</sup> | 1882.2 | 1882.2  | 1885.6 | 1885.3 | 1885.3  | 1886.4 |
| gdb 2656 | 1875.4 <sup>a</sup> | 1873.2 | 1873.1  | 1876.4 | 1873.4 | 1873.4  | 1875.4 |
| gdb 2657 | 1881.1 <sup>a</sup> | 1880.5 | 1880.5  | 1882.7 | 1883.4 | 1883.4  | 1883.9 |
| gdb 2658 | 1894.1 <sup>a</sup> | 1899.3 | 1899.3  | 1899.1 | 1901.5 | 1901.5  | 1900.9 |
| gdb 2659 | 1840.5 <sup>a</sup> | 1837.5 | 1840.3  | 1843.5 | 1838.2 | 1837.3  | 1842.1 |
| gdb 2660 | 1851.8 <sup>a</sup> | 1847.4 | 1847.4  | 1850.4 | 1851.3 | 1851.2  | 1852.1 |
| gdb 2661 | 1876.8 <sup>a</sup> | 1880.7 | 1880.7  | 1879.1 | 1876.9 | 1876.9  | 1873.7 |
| gdb 2662 | 1882.3 <sup>a</sup> | 1887.4 | 1887.4  | 1888.9 | 1888.7 | 1888.7  | 1888.1 |

... continued on next page ...

Table S73: ... continued from previous page ...

| Species  | Ref.                | OM2    | OM2-D3T | ODM2   | OM3    | OM3-D3T | ODM3   |
|----------|---------------------|--------|---------|--------|--------|---------|--------|
| gdb 2663 | 1884.0 <sup>a</sup> | 1890.8 | 1890.8  | 1893.6 | 1892.3 | 1892.3  | 1892.1 |
| gdb 2664 | 1801.4 <sup>a</sup> | 1785.4 | 1785.4  | 1785.4 | 1789.2 | 1785.1  | 1785.3 |
| gdb 2665 | 1798.9 <sup>a</sup> | 1783.9 | 1783.9  | 1787.8 | 1784.1 | 1784.1  | 1784.6 |
| gdb 2666 | 1818.5 <sup>a</sup> | 1801.5 | 1801.5  | 1806.3 | 1804.2 | 1804.2  | 1806.0 |
| gdb 2667 | 1869.7 <sup>a</sup> | 1871.9 | 1871.9  | 1876.2 | 1869.2 | 1869.2  | 1872.0 |
| gdb 2668 | 1869.7 <sup>a</sup> | 1871.6 | 1871.5  | 1875.7 | 1869.3 | 1869.3  | 1871.9 |
| gdb 2669 | 1878.4 <sup>a</sup> | 1880.6 | 1880.6  | 1884.3 | 1881.3 | 1881.3  | 1882.0 |
| gdb 2670 | 1898.8 <sup>a</sup> | 1886.5 | 1886.5  | 1889.0 | 1884.5 | 1884.5  | 1887.7 |
| gdb 2671 | 1881.7 <sup>a</sup> | 1889.0 | 1889.0  | 1892.0 | 1890.2 | 1890.2  | 1892.0 |
| gdb 2672 | 1883.0 <sup>a</sup> | 1889.9 | 1889.9  | 1894.4 | 1891.2 | 1891.2  | 1893.6 |
| gdb 2673 | 1848.0 <sup>a</sup> | 1848.2 | 1848.2  | 1848.7 | 1842.9 | 1842.9  | 1841.2 |
| gdb 2674 | 1861.3 <sup>a</sup> | 1858.6 | 1858.6  | 1863.4 | 1858.6 | 1858.6  | 1860.2 |
| gdb 2675 | 1890.8 <sup>a</sup> | 1896.0 | 1896.0  | 1899.9 | 1895.7 | 1895.7  | 1897.2 |
| gdb 2676 | 1892.1 <sup>a</sup> | 1897.9 | 1897.9  | 1901.3 | 1893.2 | 1893.2  | 1895.5 |
| gdb 2677 | 1899.0 <sup>a</sup> | 1901.4 | 1901.4  | 1905.4 | 1900.2 | 1900.2  | 1902.7 |
| gdb 2678 | 1901.4 <sup>a</sup> | 1908.0 | 1908.0  | 1910.0 | 1910.9 | 1910.9  | 1912.4 |
| gdb 2679 | 1894.5 <sup>a</sup> | 1897.9 | 1897.9  | 1897.9 | 1900.6 | 1900.5  | 1901.4 |
| gdb 2680 | 1870.4 <sup>a</sup> | 1866.4 | 1866.4  | 1868.3 | 1867.2 | 1867.1  | 1869.1 |
| gdb 2681 | 1867.6 <sup>a</sup> | 1866.6 | 1866.6  | 1867.6 | 1866.0 | 1866.0  | 1867.9 |
| gdb 2682 | 1871.9 <sup>a</sup> | 1877.0 | 1877.0  | 1879.2 | 1880.0 | 1880.0  | 1881.1 |
| gdb 2683 | 1899.9 <sup>a</sup> | 1907.5 | 1907.5  | 1907.7 | 1909.8 | 1909.8  | 1909.3 |
| gdb 2684 | 1868.6 <sup>a</sup> | 1867.6 | 1867.6  | 1865.0 | 1864.9 | 1864.8  | 1862.0 |
| gdb 2685 | 1872.5 <sup>a</sup> | 1874.1 | 1874.1  | 1875.1 | 1877.0 | 1877.0  | 1876.3 |
| gdb 2686 | 1877.3 <sup>a</sup> | 1876.0 | 1876.0  | 1877.4 | 1877.8 | 1877.8  | 1878.7 |
| gdb 2687 | 1875.3 <sup>a</sup> | 1872.6 | 1872.6  | 1874.9 | 1876.1 | 1876.1  | 1877.4 |
| gdb 2688 | 1873.2 <sup>a</sup> | 1870.6 | 1870.6  | 1869.1 | 1867.0 | 1866.9  | 1865.0 |
| gdb 2689 | 1855.4 <sup>a</sup> | 1853.7 | 1853.7  | 1856.6 | 1855.9 | 1855.8  | 1854.8 |
| gdb 2690 | 1860.9 <sup>a</sup> | 1860.0 | 1860.0  | 1864.5 | 1855.4 | 1855.3  | 1857.9 |
| gdb 2691 | 1864.8 <sup>a</sup> | 1868.2 | 1868.2  | 1875.7 | 1867.3 | 1867.2  | 1869.1 |
| gdb 2692 | 1873.5 <sup>a</sup> | 1875.9 | 1875.9  | 1874.5 | 1872.1 | 1872.1  | 1870.3 |
| gdb 2693 | 1869.3 <sup>a</sup> | 1868.9 | 1868.9  | 1870.8 | 1869.3 | 1869.2  | 1870.6 |
| gdb 2694 | 1876.9 <sup>a</sup> | 1884.6 | 1884.6  | 1887.7 | 1885.1 | 1885.1  | 1885.7 |
| gdb 2695 | 1906.1 <sup>a</sup> | 1914.2 | 1914.1  | 1915.5 | 1916.9 | 1916.9  | 1917.7 |
| gdb 2696 | 1876.9 <sup>a</sup> | 1878.2 | 1878.2  | 1877.0 | 1875.4 | 1875.3  | 1873.3 |
| gdb 2697 | 1897.7 <sup>a</sup> | 1884.6 | 1884.5  | 1885.6 | 1883.3 | 1883.2  | 1884.7 |
| gdb 2698 | 1879.0 <sup>a</sup> | 1883.3 | 1883.3  | 1886.1 | 1885.1 | 1885.1  | 1885.3 |
| gdb 2699 | 1893.0 <sup>a</sup> | 1901.8 | 1901.8  | 1903.2 | 1904.4 | 1904.4  | 1906.6 |
| gdb 2700 | 1892.0 <sup>a</sup> | 1897.2 | 1897.2  | 1897.8 | 1900.8 | 1900.7  | 1901.7 |
| gdb 2701 | 1897.8 <sup>a</sup> | 1905.3 | 1905.3  | 1907.0 | 1909.5 | 1909.5  | 1911.5 |
| gdb 2702 | 1904.8 <sup>a</sup> | 1911.6 | 1911.6  | 1913.9 | 1913.4 | 1913.4  | 1914.8 |
| gdb 2703 | 1917.8 <sup>a</sup> | 1928.4 | 1928.4  | 1929.1 | 1931.4 | 1931.3  | 1932.5 |
| gdb 2704 | 1865.9 <sup>a</sup> | 1850.5 | 1850.5  | 1854.8 | 1851.7 | 1851.7  | 1852.8 |
| gdb 2705 | 1859.6 <sup>a</sup> | 1840.2 | 1840.2  | 1843.3 | 1840.1 | 1840.1  | 1840.9 |
| gdb 2706 | 1859.7 <sup>a</sup> | 1846.5 | 1846.4  | 1850.9 | 1849.4 | 1849.4  | 1850.4 |
| gdb 2707 | 1861.6 <sup>a</sup> | 1845.9 | 1845.9  | 1850.1 | 1848.4 | 1848.4  | 1849.7 |
| gdb 2708 | 1851.7 <sup>a</sup> | 1833.4 | 1833.4  | 1836.5 | 1834.4 | 1834.4  | 1835.7 |
| gdb 2709 | 1839.3 <sup>a</sup> | 1814.8 | 1814.8  | 1817.3 | 1814.7 | 1814.7  | 1815.1 |
| gdb 2710 | 1849.6 <sup>a</sup> | 1824.3 | 1824.3  | 1830.6 | 1827.0 | 1827.0  | 1829.2 |
| gdb 2711 | 1837.8 <sup>a</sup> | 1813.3 | 1813.3  | 1816.6 | 1812.7 | 1812.7  | 1813.3 |
| gdb 2712 | 1847.7 <sup>a</sup> | 1822.2 | 1822.2  | 1828.0 | 1825.1 | 1825.1  | 1827.3 |
| gdb 2713 | 1838.1 <sup>a</sup> | 1830.0 | 1830.0  | 1828.6 | 1826.9 | 1826.9  | 1823.8 |
| gdb 2714 | 1840.1 <sup>a</sup> | 1831.2 | 1831.2  | 1833.5 | 1835.0 | 1835.0  | 1834.6 |
| gdb 2715 | 1837.1 <sup>a</sup> | 1828.9 | 1828.9  | 1827.9 | 1826.0 | 1826.0  | 1823.0 |
| gdb 2716 | 1838.9 <sup>a</sup> | 1832.2 | 1832.2  | 1835.0 | 1836.6 | 1836.6  | 1836.4 |
| gdb 2717 | 1885.1 <sup>a</sup> | 1877.5 | 1877.5  | 1879.2 | 1881.2 | 1881.2  | 1881.8 |
| gdb 2718 | 1885.9 <sup>a</sup> | 1876.8 | 1876.8  | 1878.7 | 1880.6 | 1880.6  | 1881.0 |
| gdb 2719 | 1895.8 <sup>a</sup> | 1871.9 | 1871.9  | 1872.4 | 1872.6 | 1872.6  | 1874.1 |
| gdb 2720 | 1884.3 <sup>a</sup> | 1877.0 | 1877.0  | 1879.3 | 1881.4 | 1881.4  | 1882.2 |
| gdb 2721 | 1879.1 <sup>a</sup> | 1858.6 | 1858.6  | 1862.3 | 1862.1 | 1862.1  | 1863.4 |
| gdb 2722 | 1877.8 <sup>a</sup> | 1857.4 | 1857.4  | 1860.5 | 1861.2 | 1861.2  | 1862.2 |
| gdb 2723 | 1866.9 <sup>a</sup> | 1854.9 | 1854.9  | 1854.6 | 1853.9 | 1853.8  | 1851.3 |
| gdb 2724 | 1876.8 <sup>a</sup> | 1871.6 | 1871.6  | 1876.8 | 1871.3 | 1871.3  | 1873.3 |
| gdb 2725 | 1875.5 <sup>a</sup> | 1872.6 | 1872.6  | 1874.8 | 1868.4 | 1868.4  | 1868.5 |
| gdb 2726 | 1873.8 <sup>a</sup> | 1869.9 | 1869.9  | 1874.5 | 1869.9 | 1869.9  | 1872.0 |
| gdb 2727 | 1867.9 <sup>a</sup> | 1852.9 | 1852.9  | 1856.6 | 1855.5 | 1855.5  | 1857.2 |

... continued on next page ...

Table S73: ... continued from previous page ...

| Species  | Ref.                | OM2    | OM2-D3T | ODM2   | OM3    | OM3-D3T | ODM3   |
|----------|---------------------|--------|---------|--------|--------|---------|--------|
| gdb 2728 | 1858.5 <sup>a</sup> | 1847.3 | 1847.3  | 1847.5 | 1845.7 | 1845.7  | 1844.6 |
| gdb 2729 | 1868.4 <sup>a</sup> | 1850.2 | 1850.1  | 1853.3 | 1853.2 | 1853.1  | 1854.8 |
| gdb 2730 | 1856.1 <sup>a</sup> | 1847.3 | 1847.3  | 1845.8 | 1843.1 | 1843.1  | 1839.6 |
| gdb 2731 | 1857.4 <sup>a</sup> | 1851.6 | 1851.6  | 1851.3 | 1847.6 | 1847.6  | 1844.0 |
| gdb 2732 | 1851.7 <sup>a</sup> | 1841.8 | 1841.8  | 1837.7 | 1832.6 | 1832.6  | 1826.5 |
| gdb 2733 | 1854.8 <sup>a</sup> | 1844.7 | 1844.7  | 1844.4 | 1842.4 | 1842.4  | 1839.6 |
| gdb 2734 | 1857.8 <sup>a</sup> | 1852.3 | 1852.3  | 1855.9 | 1854.8 | 1854.8  | 1854.5 |
| gdb 2735 | 1887.1 <sup>a</sup> | 1882.5 | 1882.5  | 1885.3 | 1885.0 | 1885.0  | 1886.0 |
| gdb 2736 | 1886.0 <sup>a</sup> | 1882.2 | 1882.2  | 1885.0 | 1884.8 | 1884.7  | 1885.8 |
| gdb 2737 | 1886.0 <sup>a</sup> | 1881.9 | 1881.9  | 1884.7 | 1884.9 | 1884.9  | 1885.9 |
| gdb 2738 | 1877.7 <sup>a</sup> | 1873.4 | 1873.4  | 1874.5 | 1876.0 | 1876.0  | 1876.6 |
| gdb 2739 | 1868.6 <sup>a</sup> | 1860.0 | 1860.0  | 1861.6 | 1860.3 | 1860.3  | 1861.9 |
| gdb 2740 | 1872.7 <sup>a</sup> | 1861.3 | 1861.3  | 1862.4 | 1861.7 | 1861.7  | 1863.2 |
| gdb 2741 | 1877.6 <sup>a</sup> | 1873.6 | 1873.6  | 1875.5 | 1876.7 | 1876.7  | 1877.4 |
| gdb 2742 | 1851.3 <sup>a</sup> | 1848.6 | 1848.6  | 1844.7 | 1839.1 | 1839.1  | 1833.4 |
| gdb 2743 | 1855.1 <sup>a</sup> | 1856.8 | 1856.8  | 1856.8 | 1852.2 | 1852.1  | 1848.8 |
| gdb 2744 | 1851.9 <sup>a</sup> | 1847.1 | 1847.1  | 1850.5 | 1848.0 | 1848.0  | 1847.9 |
| gdb 2745 | 1851.7 <sup>a</sup> | 1854.2 | 1854.2  | 1849.2 | 1840.9 | 1840.9  | 1843.9 |
| gdb 2746 | 1848.3 <sup>a</sup> | 1834.5 | 1834.5  | 1836.9 | 1832.7 | 1832.7  | 1835.4 |
| gdb 2747 | 1851.9 <sup>a</sup> | 1838.0 | 1838.0  | 1840.4 | 1835.8 | 1835.8  | 1838.9 |
| gdb 2748 | 1863.0 <sup>a</sup> | 1855.7 | 1855.6  | 1857.9 | 1855.9 | 1855.9  | 1857.9 |
| gdb 2749 | 1859.4 <sup>a</sup> | 1852.2 | 1852.1  | 1854.7 | 1852.6 | 1852.6  | 1854.5 |
| gdb 2750 | 1859.8 <sup>a</sup> | 1843.2 | 1843.2  | 1845.9 | 1845.2 | 1845.0  | 1846.2 |
| gdb 2751 | 1884.1 <sup>a</sup> | 1877.1 | 1877.1  | 1879.0 | 1880.7 | 1880.7  | 1881.5 |
| gdb 2752 | 1882.7 <sup>a</sup> | 1877.4 | 1877.4  | 1880.0 | 1881.7 | 1881.7  | 1882.4 |
| gdb 2753 | 1883.5 <sup>a</sup> | 1878.8 | 1878.8  | 1881.4 | 1881.3 | 1881.3  | 1881.9 |
| gdb 2754 | 1870.1 <sup>a</sup> | 1852.2 | 1852.2  | 1856.9 | 1854.7 | 1854.7  | 1857.4 |
| gdb 2755 | 1871.6 <sup>a</sup> | 1855.0 | 1855.0  | 1858.7 | 1858.6 | 1858.6  | 1860.7 |
| gdb 2756 | 1902.7 <sup>a</sup> | 1905.4 | 1905.4  | 1906.3 | 1908.6 | 1908.6  | 1908.8 |
| gdb 2757 | 1903.7 <sup>a</sup> | 1905.4 | 1905.4  | 1906.9 | 1909.2 | 1909.2  | 1909.4 |
| gdb 2758 | 1894.3 <sup>a</sup> | 1898.0 | 1898.0  | 1899.4 | 1898.1 | 1898.1  | 1899.8 |
| gdb 2759 | 1912.7 <sup>a</sup> | 1907.7 | 1907.7  | 1908.3 | 1906.0 | 1905.9  | 1908.1 |
| gdb 2760 | 1887.8 <sup>a</sup> | 1884.6 | 1884.6  | 1887.0 | 1887.5 | 1887.5  | 1888.1 |
| gdb 2761 | 1884.5 <sup>a</sup> | 1877.1 | 1877.1  | 1879.5 | 1880.8 | 1880.8  | 1881.1 |
| gdb 2762 | 1883.6 <sup>a</sup> | 1878.3 | 1878.3  | 1879.9 | 1880.7 | 1880.6  | 1880.7 |
| gdb 2763 | 1885.0 <sup>a</sup> | 1878.6 | 1878.6  | 1880.2 | 1881.9 | 1881.9  | 1882.3 |
| gdb 2764 | 1875.9 <sup>a</sup> | 1855.2 | 1855.2  | 1858.8 | 1859.1 | 1859.1  | 1860.4 |
| gdb 2765 | 1876.4 <sup>a</sup> | 1855.9 | 1855.9  | 1860.2 | 1859.4 | 1859.4  | 1861.4 |
| gdb 2766 | 1834.0 <sup>a</sup> | 1815.0 | 1815.0  | 1816.2 | 1813.1 | 1813.1  | 1811.9 |
| gdb 2767 | 1844.8 <sup>a</sup> | 1828.9 | 1828.9  | 1834.3 | 1831.5 | 1831.5  | 1832.9 |
| gdb 2768 | 1861.6 <sup>a</sup> | 1849.1 | 1849.1  | 1852.9 | 1852.7 | 1852.7  | 1855.4 |
| gdb 2769 | 1887.7 <sup>a</sup> | 1884.9 | 1884.9  | 1888.0 | 1886.3 | 1886.2  | 1887.5 |
| gdb 2770 | 1886.6 <sup>a</sup> | 1883.0 | 1883.0  | 1885.4 | 1884.7 | 1884.7  | 1885.7 |
| gdb 2771 | 1885.1 <sup>a</sup> | 1881.6 | 1881.5  | 1884.6 | 1884.1 | 1884.1  | 1885.2 |
| gdb 2772 | 1870.6 <sup>a</sup> | 1862.1 | 1862.1  | 1864.2 | 1862.7 | 1862.6  | 1864.3 |
| gdb 2773 | 1877.5 <sup>a</sup> | 1875.1 | 1875.1  | 1876.7 | 1877.0 | 1877.0  | 1877.8 |
| gdb 2774 | 1877.8 <sup>a</sup> | 1874.3 | 1874.3  | 1875.9 | 1876.9 | 1876.8  | 1877.7 |
| gdb 2775 | 1883.0 <sup>a</sup> | 1876.9 | 1876.9  | 1878.7 | 1878.8 | 1878.8  | 1879.3 |
| gdb 2776 | 1883.8 <sup>a</sup> | 1878.4 | 1878.4  | 1880.6 | 1881.5 | 1881.5  | 1882.1 |
| gdb 2777 | 1875.3 <sup>a</sup> | 1875.5 | 1875.5  | 1879.0 | 1877.8 | 1877.7  | 1879.2 |
| gdb 2778 | 1873.7 <sup>a</sup> | 1870.1 | 1870.1  | 1872.1 | 1873.6 | 1873.6  | 1875.0 |
| gdb 2779 | 1874.4 <sup>a</sup> | 1870.9 | 1870.9  | 1873.5 | 1874.8 | 1874.8  | 1876.3 |
| gdb 2780 | 1868.4 <sup>a</sup> | 1858.9 | 1858.9  | 1860.9 | 1859.8 | 1859.8  | 1861.7 |
| gdb 2781 | 1903.6 <sup>a</sup> | 1908.7 | 1908.7  | 1909.7 | 1911.2 | 1911.1  | 1911.1 |
| gdb 2782 | 1915.0 <sup>a</sup> | 1911.2 | 1911.2  | 1912.1 | 1909.6 | 1909.6  | 1911.6 |
| gdb 2783 | 1901.3 <sup>a</sup> | 1905.1 | 1905.1  | 1906.4 | 1908.5 | 1908.5  | 1908.7 |
| gdb 2784 | 1883.1 <sup>a</sup> | 1878.8 | 1878.7  | 1881.0 | 1881.0 | 1881.0  | 1881.8 |
| gdb 2785 | 1885.0 <sup>a</sup> | 1883.1 | 1883.1  | 1884.9 | 1884.7 | 1884.7  | 1884.5 |
| gdb 2786 | 1888.9 <sup>a</sup> | 1887.8 | 1887.8  | 1890.8 | 1889.6 | 1889.6  | 1890.3 |
| gdb 2787 | 1870.4 <sup>a</sup> | 1870.7 | 1870.7  | 1872.4 | 1873.7 | 1873.7  | 1874.9 |
| gdb 2788 | 1875.3 <sup>a</sup> | 1874.3 | 1874.3  | 1876.1 | 1876.4 | 1876.4  | 1877.4 |
| gdb 2789 | 1835.9 <sup>a</sup> | 1828.2 | 1828.2  | 1829.9 | 1832.3 | 1832.3  | 1832.2 |
| gdb 2790 | 1831.8 <sup>a</sup> | 1821.6 | 1821.6  | 1824.8 | 1826.7 | 1826.7  | 1826.1 |
| gdb 2791 | 1836.2 <sup>a</sup> | 1828.8 | 1828.8  | 1831.4 | 1833.6 | 1833.6  | 1833.7 |
| gdb 2792 | 1838.8 <sup>a</sup> | 1830.6 | 1830.6  | 1832.6 | 1835.3 | 1835.2  | 1835.2 |

... continued on next page ...

Table S73: ... continued from previous page ...

| Species  | Ref.                | OM2    | OM2-D3T | ODM2   | OM3    | OM3-D3T | ODM3   |
|----------|---------------------|--------|---------|--------|--------|---------|--------|
| gdb 2793 | 1842.8 <sup>a</sup> | 1832.6 | 1832.6  | 1832.8 | 1829.6 | 1829.6  | 1826.9 |
| gdb 2794 | 1839.7 <sup>a</sup> | 1831.8 | 1831.8  | 1831.8 | 1834.6 | 1836.7  | 1836.7 |
| gdb 2795 | 1859.4 <sup>a</sup> | 1852.7 | 1852.6  | 1853.9 | 1851.1 | 1851.1  | 1851.1 |
| gdb 2796 | 1864.8 <sup>a</sup> | 1855.2 | 1855.2  | 1858.5 | 1857.4 | 1857.4  | 1858.9 |
| gdb 2797 | 1847.7 <sup>a</sup> | 1840.4 | 1840.4  | 1843.4 | 1839.2 | 1839.2  | 1841.0 |
| gdb 2798 | 1850.3 <sup>a</sup> | 1842.1 | 1842.1  | 1845.2 | 1841.1 | 1841.1  | 1842.8 |
| gdb 2799 | 1850.2 <sup>a</sup> | 1843.7 | 1843.7  | 1847.2 | 1841.4 | 1841.4  | 1843.0 |
| gdb 2800 | 1851.0 <sup>a</sup> | 1852.4 | 1852.4  | 1855.9 | 1853.6 | 1853.6  | 1854.5 |
| gdb 2801 | 1849.5 <sup>a</sup> | 1842.3 | 1842.3  | 1841.5 | 1839.8 | 1839.8  | 1837.1 |
| gdb 2802 | 1853.8 <sup>a</sup> | 1846.8 | 1846.8  | 1847.2 | 1843.1 | 1843.1  | 1840.1 |
| gdb 2803 | 1852.3 <sup>a</sup> | 1851.4 | 1851.4  | 1854.3 | 1853.8 | 1853.8  | 1852.6 |
| gdb 2804 | 1854.3 <sup>a</sup> | 1843.7 | 1843.6  | 1847.1 | 1843.3 | 1843.3  | 1846.0 |
| gdb 2805 | 1846.8 <sup>a</sup> | 1848.5 | 1848.5  | 1852.9 | 1850.5 | 1850.5  | 1852.0 |
| gdb 2806 | 1830.7 <sup>a</sup> | 1825.2 | 1825.2  | 1827.1 | 1828.6 | 1828.6  | 1828.1 |
| gdb 2807 | 1858.2 <sup>a</sup> | 1852.5 | 1852.5  | 1855.0 | 1849.9 | 1849.9  | 1849.9 |
| gdb 2808 | 1853.8 <sup>a</sup> | 1847.6 | 1847.6  | 1850.4 | 1846.9 | 1846.9  | 1846.7 |
| gdb 2809 | 1864.8 <sup>a</sup> | 1854.8 | 1854.8  | 1858.8 | 1856.9 | 1856.9  | 1858.7 |
| gdb 2810 | 1885.6 <sup>a</sup> | 1887.4 | 1887.4  | 1889.1 | 1878.5 | 1878.5  | 1881.0 |
| gdb 2811 | 1879.7 <sup>a</sup> | 1878.9 | 1878.9  | 1881.8 | 1877.3 | 1877.3  | 1879.4 |
| gdb 2812 | 1887.8 <sup>a</sup> | 1886.3 | 1886.3  | 1888.7 | 1884.3 | 1884.3  | 1885.3 |
| gdb 2813 | 1870.8 <sup>a</sup> | 1870.5 | 1870.5  | 1874.0 | 1862.8 | 1862.8  | 1867.0 |
| gdb 2814 | 1868.0 <sup>a</sup> | 1864.0 | 1864.0  | 1868.7 | 1865.6 | 1865.6  | 1867.3 |
| gdb 2815 | 1869.5 <sup>a</sup> | 1868.3 | 1868.2  | 1871.6 | 1867.9 | 1867.8  | 1870.3 |
| gdb 2816 | 1859.3 <sup>a</sup> | 1844.4 | 1844.4  | 1848.9 | 1847.9 | 1847.8  | 1849.4 |
| gdb 2817 | 1857.3 <sup>a</sup> | 1843.6 | 1843.5  | 1847.9 | 1847.2 | 1847.2  | 1848.5 |
| gdb 2818 | 1851.6 <sup>a</sup> | 1835.6 | 1835.6  | 1838.9 | 1835.7 | 1835.6  | 1836.9 |
| gdb 2819 | 1849.4 <sup>a</sup> | 1833.0 | 1833.0  | 1835.5 | 1833.7 | 1833.7  | 1834.4 |
| gdb 2820 | 1855.2 <sup>a</sup> | 1838.9 | 1838.9  | 1843.1 | 1843.0 | 1843.0  | 1844.6 |
| gdb 2821 | 1851.6 <sup>a</sup> | 1824.8 | 1824.8  | 1831.2 | 1828.0 | 1828.0  | 1830.4 |
| gdb 2822 | 1843.3 <sup>a</sup> | 1816.8 | 1816.8  | 1820.1 | 1817.5 | 1817.4  | 1818.4 |
| gdb 2823 | 1847.4 <sup>a</sup> | 1821.0 | 1821.0  | 1827.0 | 1824.3 | 1824.3  | 1826.8 |
| gdb 2824 | 1839.8 <sup>a</sup> | 1830.4 | 1830.4  | 1832.7 | 1834.9 | 1834.9  | 1834.8 |
| gdb 2825 | 1840.4 <sup>a</sup> | 1830.7 | 1830.7  | 1833.2 | 1834.9 | 1834.8  | 1834.7 |
| gdb 2826 | 1843.2 <sup>a</sup> | 1832.2 | 1832.2  | 1832.1 | 1828.7 | 1828.7  | 1826.3 |
| gdb 2827 | 1840.7 <sup>a</sup> | 1831.3 | 1831.3  | 1830.6 | 1828.8 | 1828.8  | 1825.8 |
| gdb 2828 | 1840.4 <sup>a</sup> | 1831.7 | 1831.7  | 1834.6 | 1836.6 | 1836.6  | 1836.7 |
| gdb 2829 | 1853.9 <sup>a</sup> | 1843.1 | 1843.1  | 1842.2 | 1840.5 | 1840.4  | 1837.7 |
| gdb 2830 | 1847.6 <sup>a</sup> | 1830.8 | 1830.8  | 1833.3 | 1833.4 | 1833.4  | 1833.8 |
| gdb 2831 | 1853.9 <sup>a</sup> | 1843.1 | 1843.1  | 1842.9 | 1841.3 | 1841.3  | 1838.7 |
| gdb 2832 | 1854.5 <sup>a</sup> | 1846.4 | 1846.4  | 1849.4 | 1850.1 | 1850.1  | 1850.1 |
| gdb 2833 | 1858.7 <sup>a</sup> | 1848.2 | 1848.2  | 1853.5 | 1850.3 | 1850.3  | 1852.1 |
| gdb 2834 | 1856.5 <sup>a</sup> | 1840.6 | 1840.6  | 1844.5 | 1844.0 | 1843.9  | 1845.5 |
| gdb 2835 | 1847.6 <sup>a</sup> | 1823.1 | 1823.1  | 1830.5 | 1826.1 | 1826.1  | 1829.1 |
| gdb 2836 | 1848.0 <sup>a</sup> | 1822.1 | 1822.1  | 1828.9 | 1825.5 | 1825.5  | 1827.9 |
| gdb 2837 | 1849.7 <sup>a</sup> | 1823.0 | 1823.0  | 1829.7 | 1826.4 | 1826.4  | 1828.9 |
| gdb 2838 | 1859.6 <sup>a</sup> | 1849.0 | 1849.0  | 1854.3 | 1851.0 | 1851.0  | 1852.6 |
| gdb 2839 | 1858.4 <sup>a</sup> | 1844.4 | 1844.4  | 1849.5 | 1847.3 | 1847.3  | 1849.1 |
| gdb 2840 | 1858.2 <sup>a</sup> | 1844.1 | 1844.1  | 1849.1 | 1847.3 | 1847.3  | 1848.7 |
| gdb 2841 | 1848.0 <sup>a</sup> | 1824.1 | 1824.1  | 1830.9 | 1827.1 | 1827.1  | 1829.8 |
| gdb 2842 | 1876.5 <sup>a</sup> | 1870.7 | 1870.7  | 1874.8 | 1868.6 | 1868.5  | 1870.8 |
| gdb 2843 | 1872.9 <sup>a</sup> | 1868.4 | 1868.4  | 1872.7 | 1867.3 | 1867.3  | 1870.1 |
| gdb 2844 | 1869.7 <sup>a</sup> | 1866.6 | 1866.6  | 1870.2 | 1865.4 | 1865.4  | 1867.7 |
| gdb 2845 | 1877.5 <sup>a</sup> | 1873.8 | 1873.8  | 1878.1 | 1876.2 | 1876.2  | 1877.4 |
| gdb 2846 | 1860.3 <sup>a</sup> | 1846.6 | 1846.6  | 1851.3 | 1849.6 | 1849.6  | 1851.0 |
| gdb 2847 | 1861.9 <sup>a</sup> | 1849.5 | 1849.5  | 1853.9 | 1851.0 | 1851.0  | 1852.1 |
| gdb 2848 | 1862.2 <sup>a</sup> | 1841.6 | 1841.6  | 1844.8 | 1841.8 | 1841.8  | 1842.5 |
| gdb 2849 | 1860.9 <sup>a</sup> | 1845.3 | 1845.3  | 1849.5 | 1848.3 | 1848.3  | 1849.6 |
| gdb 2850 | 1859.6 <sup>a</sup> | 1849.4 | 1849.4  | 1854.0 | 1850.6 | 1850.6  | 1851.9 |
| gdb 2851 | 1861.0 <sup>a</sup> | 1851.1 | 1851.1  | 1856.5 | 1852.6 | 1852.6  | 1854.0 |
| gdb 2852 | 1863.6 <sup>a</sup> | 1850.2 | 1850.2  | 1855.0 | 1852.0 | 1851.9  | 1852.9 |
| gdb 2853 | 1871.3 <sup>a</sup> | 1867.9 | 1867.9  | 1872.1 | 1866.4 | 1866.4  | 1869.2 |
| gdb 2854 | 1878.6 <sup>a</sup> | 1875.5 | 1875.5  | 1879.2 | 1877.0 | 1877.0  | 1878.2 |
| gdb 2855 | 1866.0 <sup>a</sup> | 1848.5 | 1848.5  | 1853.8 | 1848.0 | 1848.0  | 1851.7 |
| gdb 2856 | 1870.3 <sup>a</sup> | 1853.7 | 1853.7  | 1861.0 | 1856.4 | 1856.4  | 1859.7 |
| gdb 2857 | 1870.3 <sup>a</sup> | 1861.2 | 1861.2  | 1865.0 | 1860.6 | 1860.6  | 1862.4 |

... continued on next page ...



Table S73: ... continued from previous page ...

| Species  | Ref.                | OM2    | OM2-D3T | ODM2   | OM3    | OM3-D3T | ODM3   |
|----------|---------------------|--------|---------|--------|--------|---------|--------|
| gdb 2858 | 1871.8 <sup>a</sup> | 1862.8 | 1862.8  | 1866.6 | 1862.0 | 1862.0  | 1864.0 |
| gdb 2859 | 1878.7 <sup>a</sup> | 1875.9 | 1875.8  | 1879.4 | 1876.7 | 1876.7  | 1877.7 |
| gdb 2860 | 1856.9 <sup>a</sup> | 1848.7 | 1848.7  | 1850.0 | 1847.0 | 1847.0  | 1847.4 |
| gdb 2861 | 1857.9 <sup>a</sup> | 1849.6 | 1849.6  | 1851.4 | 1848.5 | 1848.5  | 1848.8 |
| gdb 2862 | 1862.9 <sup>a</sup> | 1851.7 | 1851.7  | 1855.8 | 1854.9 | 1854.9  | 1856.5 |
| gdb 2863 | 1864.4 <sup>a</sup> | 1850.6 | 1850.6  | 1854.9 | 1852.6 | 1852.6  | 1853.3 |
| gdb 2864 | 1859.4 <sup>a</sup> | 1840.4 | 1840.4  | 1843.2 | 1840.3 | 1840.3  | 1840.9 |
| gdb 2865 | 1858.4 <sup>a</sup> | 1845.9 | 1845.9  | 1850.4 | 1849.0 | 1849.0  | 1850.1 |
| gdb 2866 | 1859.8 <sup>a</sup> | 1845.8 | 1845.8  | 1849.6 | 1848.5 | 1848.5  | 1849.2 |
| gdb 2867 | 1850.8 <sup>a</sup> | 1835.5 | 1835.5  | 1837.9 | 1835.7 | 1835.7  | 1836.2 |
| gdb 2868 | 1897.6 <sup>a</sup> | 1889.0 | 1889.0  | 1892.2 | 1887.2 | 1887.2  | 1888.8 |
| gdb 2869 | 1891.9 <sup>a</sup> | 1884.4 | 1884.4  | 1886.0 | 1877.7 | 1877.7  | 1880.2 |
| gdb 2870 | 1902.9 <sup>a</sup> | 1895.1 | 1895.1  | 1899.0 | 1895.3 | 1895.3  | 1896.6 |
| gdb 2871 | 1893.6 <sup>a</sup> | 1884.8 | 1884.8  | 1888.6 | 1883.2 | 1883.2  | 1885.1 |
| gdb 2872 | 1900.8 <sup>a</sup> | 1892.8 | 1892.8  | 1896.2 | 1892.8 | 1892.8  | 1894.3 |
| gdb 2873 | 1891.8 <sup>a</sup> | 1882.1 | 1882.1  | 1884.7 | 1880.4 | 1880.4  | 1882.2 |
| gdb 2874 | 1896.8 <sup>a</sup> | 1886.8 | 1886.7  | 1890.1 | 1885.6 | 1885.6  | 1887.4 |
| gdb 2875 | 1889.7 <sup>a</sup> | 1880.1 | 1880.1  | 1883.3 | 1879.8 | 1879.7  | 1881.8 |
| gdb 2876 | 1889.6 <sup>a</sup> | 1881.1 | 1881.1  | 1882.8 | 1874.5 | 1874.5  | 1877.1 |
| gdb 2877 | 1898.9 <sup>a</sup> | 1890.4 | 1890.4  | 1894.4 | 1892.2 | 1892.2  | 1894.0 |
| gdb 2878 | 1890.3 <sup>a</sup> | 1891.2 | 1891.2  | 1893.8 | 1884.0 | 1884.0  | 1888.2 |
| gdb 2879 | 1881.9 <sup>a</sup> | 1879.3 | 1879.3  | 1883.1 | 1875.3 | 1875.3  | 1879.2 |
| gdb 2880 | 1891.7 <sup>a</sup> | 1888.8 | 1888.8  | 1891.8 | 1887.2 | 1887.2  | 1890.0 |
| gdb 2881 | 1895.1 <sup>a</sup> | 1895.4 | 1895.4  | 1898.9 | 1893.2 | 1893.2  | 1895.3 |
| gdb 2882 | 1894.6 <sup>a</sup> | 1892.6 | 1892.6  | 1896.1 | 1891.8 | 1891.8  | 1893.5 |
| gdb 2883 | 1852.7 <sup>a</sup> | 1826.1 | 1826.1  | 1832.4 | 1829.1 | 1829.1  | 1831.3 |
| gdb 2884 | 1850.3 <sup>a</sup> | 1824.5 | 1824.5  | 1829.6 | 1827.4 | 1827.4  | 1829.2 |
| gdb 2885 | 1841.9 <sup>a</sup> | 1816.4 | 1816.4  | 1819.4 | 1816.7 | 1816.6  | 1817.4 |
| gdb 2886 | 1850.8 <sup>a</sup> | 1824.1 | 1824.1  | 1830.0 | 1827.1 | 1827.1  | 1829.0 |
| gdb 2887 | 1842.1 <sup>a</sup> | 1817.5 | 1817.5  | 1820.7 | 1817.3 | 1817.3  | 1817.5 |
| gdb 2888 | 1867.7 <sup>a</sup> | 1855.3 | 1855.3  | 1860.0 | 1852.5 | 1852.5  | 1854.9 |
| gdb 2889 | 1864.7 <sup>a</sup> | 1853.0 | 1853.0  | 1856.7 | 1850.3 | 1850.3  | 1852.7 |
| gdb 2890 | 1869.1 <sup>a</sup> | 1859.9 | 1859.9  | 1865.8 | 1860.2 | 1860.2  | 1863.3 |
| gdb 2891 | 1867.4 <sup>a</sup> | 1856.2 | 1856.2  | 1859.5 | 1853.3 | 1853.3  | 1855.4 |
| gdb 2892 | 1867.0 <sup>a</sup> | 1859.9 | 1859.9  | 1864.9 | 1857.0 | 1857.0  | 1859.5 |
| gdb 2893 | 1868.1 <sup>a</sup> | 1856.4 | 1856.4  | 1860.4 | 1853.9 | 1853.9  | 1856.0 |
| gdb 2894 | 1873.9 <sup>a</sup> | 1863.3 | 1863.3  | 1868.2 | 1863.8 | 1863.8  | 1866.2 |
| gdb 2895 | 1855.2 <sup>a</sup> | 1841.9 | 1841.9  | 1844.4 | 1840.6 | 1840.6  | 1841.5 |
| gdb 2896 | 1870.6 <sup>a</sup> | 1854.5 | 1854.5  | 1860.6 | 1856.8 | 1856.8  | 1859.1 |
| gdb 2897 | 1892.5 <sup>a</sup> | 1895.0 | 1895.0  | 1898.6 | 1885.4 | 1885.4  | 1890.0 |
| gdb 2898 | 1896.1 <sup>a</sup> | 1890.8 | 1890.8  | 1893.9 | 1887.5 | 1887.5  | 1890.2 |
| gdb 2899 | 1894.8 <sup>a</sup> | 1894.2 | 1894.2  | 1899.4 | 1890.9 | 1890.9  | 1894.1 |
| gdb 2900 | 1839.6 <sup>a</sup> | 1830.7 | 1830.7  | 1833.0 | 1835.2 | 1835.2  | 1835.0 |
| gdb 2901 | 1840.1 <sup>a</sup> | 1831.2 | 1831.2  | 1833.6 | 1835.2 | 1835.2  | 1834.9 |
| gdb 2902 | 1843.1 <sup>a</sup> | 1832.2 | 1832.2  | 1832.3 | 1828.7 | 1828.7  | 1826.3 |
| gdb 2903 | 1840.6 <sup>a</sup> | 1832.4 | 1832.4  | 1835.1 | 1837.4 | 1837.4  | 1837.0 |
| gdb 2904 | 1841.0 <sup>a</sup> | 1832.4 | 1832.4  | 1831.7 | 1830.3 | 1830.3  | 1827.0 |
| gdb 2905 | 1878.4 <sup>a</sup> | 1873.9 | 1873.9  | 1873.4 | 1869.8 | 1869.8  | 1866.9 |
| gdb 2906 | 1874.7 <sup>a</sup> | 1868.9 | 1868.9  | 1867.9 | 1865.9 | 1865.9  | 1863.5 |
| gdb 2907 | 1871.7 <sup>a</sup> | 1874.4 | 1874.4  | 1875.7 | 1876.3 | 1876.2  | 1875.6 |
| gdb 2908 | 1863.9 <sup>a</sup> | 1851.6 | 1851.6  | 1853.3 | 1847.0 | 1847.0  | 1846.2 |
| gdb 2909 | 1863.9 <sup>a</sup> | 1859.0 | 1859.0  | 1863.8 | 1859.3 | 1859.3  | 1860.6 |
| gdb 2910 | 1873.2 <sup>a</sup> | 1870.2 | 1870.2  | 1868.9 | 1867.1 | 1867.1  | 1864.6 |
| gdb 2911 | 1864.9 <sup>a</sup> | 1863.8 | 1863.8  | 1865.8 | 1864.3 | 1864.3  | 1865.3 |
| gdb 2912 | 1876.3 <sup>a</sup> | 1869.2 | 1869.2  | 1868.2 | 1866.7 | 1866.7  | 1864.4 |
| gdb 2913 | 1872.9 <sup>a</sup> | 1872.5 | 1872.5  | 1874.6 | 1875.7 | 1875.6  | 1875.5 |
| gdb 2914 | 1870.9 <sup>a</sup> | 1866.7 | 1866.7  | 1870.0 | 1864.8 | 1864.8  | 1867.2 |
| gdb 2915 | 1879.4 <sup>a</sup> | 1875.3 | 1875.3  | 1878.8 | 1873.0 | 1872.9  | 1874.6 |
| gdb 2916 | 1871.6 <sup>a</sup> | 1867.5 | 1867.5  | 1871.2 | 1865.5 | 1865.5  | 1867.7 |
| gdb 2917 | 1882.8 <sup>a</sup> | 1878.9 | 1878.9  | 1882.7 | 1879.2 | 1879.2  | 1879.8 |
| gdb 2918 | 1872.7 <sup>a</sup> | 1869.3 | 1869.3  | 1872.0 | 1867.4 | 1867.4  | 1869.2 |
| gdb 2919 | 1870.8 <sup>a</sup> | 1864.6 | 1864.6  | 1867.5 | 1863.5 | 1863.5  | 1866.0 |
| gdb 2920 | 1870.3 <sup>a</sup> | 1866.7 | 1866.7  | 1870.2 | 1865.9 | 1865.9  | 1868.0 |
| gdb 2921 | 1868.7 <sup>a</sup> | 1861.0 | 1861.0  | 1864.8 | 1861.4 | 1861.4  | 1864.1 |
| gdb 2922 | 1877.3 <sup>a</sup> | 1872.7 | 1872.7  | 1876.7 | 1875.7 | 1875.7  | 1876.7 |

... continued on next page ...

Table S73: ... continued from previous page ...

| Species  | Ref.                | OM2    | OM2-D3T | ODM2   | OM3    | OM3-D3T | ODM3   |
|----------|---------------------|--------|---------|--------|--------|---------|--------|
| gdb 2923 | 1865.7 <sup>a</sup> | 1848.2 | 1848.2  | 1853.1 | 1847.0 | 1847.0  | 1850.5 |
| gdb 2924 | 1867.3 <sup>a</sup> | 1850.3 | 1850.3  | 1850.3 | 1854.9 | 1849.2  | 1852.5 |
| gdb 2925 | 1861.7 <sup>a</sup> | 1845.0 | 1844.9  | 1851.6 | 1843.5 | 1843.5  | 1848.2 |
| gdb 2926 | 1875.3 <sup>a</sup> | 1857.5 | 1857.5  | 1863.9 | 1859.4 | 1859.4  | 1861.9 |
| gdb 2927 | 1868.0 <sup>a</sup> | 1848.9 | 1848.9  | 1853.5 | 1848.0 | 1848.0  | 1851.3 |
| gdb 2928 | 1867.6 <sup>a</sup> | 1847.6 | 1847.6  | 1852.7 | 1847.0 | 1847.0  | 1850.0 |
| gdb 2929 | 1876.4 <sup>a</sup> | 1855.0 | 1855.0  | 1859.8 | 1857.5 | 1857.5  | 1859.4 |
| gdb 2930 | 1846.6 <sup>a</sup> | 1837.4 | 1837.4  | 1840.3 | 1836.6 | 1836.5  | 1838.5 |
| gdb 2931 | 1854.5 <sup>a</sup> | 1840.7 | 1840.7  | 1844.0 | 1840.1 | 1840.0  | 1842.8 |
| gdb 2932 | 1847.8 <sup>a</sup> | 1838.9 | 1838.9  | 1842.4 | 1838.5 | 1838.4  | 1840.4 |
| gdb 2933 | 1847.7 <sup>a</sup> | 1838.4 | 1838.4  | 1841.9 | 1838.3 | 1838.3  | 1840.4 |
| gdb 2934 | 1850.4 <sup>a</sup> | 1846.3 | 1846.3  | 1850.3 | 1848.8 | 1848.8  | 1849.9 |
| gdb 2935 | 1859.3 <sup>a</sup> | 1843.2 | 1843.2  | 1848.3 | 1836.8 | 1836.8  | 1843.3 |
| gdb 2936 | 1863.3 <sup>a</sup> | 1846.3 | 1846.3  | 1851.6 | 1846.1 | 1846.1  | 1850.2 |
| gdb 2937 | 1861.2 <sup>a</sup> | 1844.6 | 1844.6  | 1849.5 | 1845.1 | 1845.1  | 1849.2 |
| gdb 2938 | 1888.8 <sup>a</sup> | 1887.6 | 1887.6  | 1890.6 | 1889.3 | 1889.3  | 1890.0 |
| gdb 2939 | 1876.3 <sup>a</sup> | 1874.4 | 1874.4  | 1879.3 | 1874.2 | 1874.2  | 1875.8 |
| gdb 2940 | 1887.8 <sup>a</sup> | 1884.7 | 1884.7  | 1887.2 | 1887.7 | 1887.6  | 1888.3 |
| gdb 2941 | 1888.1 <sup>a</sup> | 1887.6 | 1887.6  | 1889.8 | 1887.8 | 1887.8  | 1888.5 |
| gdb 2942 | 1886.8 <sup>a</sup> | 1884.7 | 1884.7  | 1888.7 | 1885.7 | 1885.7  | 1887.1 |
| gdb 2943 | 1886.1 <sup>a</sup> | 1884.8 | 1884.8  | 1888.3 | 1886.4 | 1886.4  | 1887.4 |
| gdb 2944 | 1885.6 <sup>a</sup> | 1881.8 | 1881.8  | 1884.5 | 1883.9 | 1883.9  | 1885.0 |
| gdb 2945 | 1877.3 <sup>a</sup> | 1874.4 | 1874.4  | 1879.5 | 1873.4 | 1873.3  | 1875.2 |
| gdb 2946 | 1870.6 <sup>a</sup> | 1867.7 | 1867.7  | 1872.3 | 1867.5 | 1867.5  | 1869.5 |
| gdb 2947 | 1875.1 <sup>a</sup> | 1875.2 | 1875.2  | 1879.3 | 1873.6 | 1873.6  | 1875.1 |
| gdb 2948 | 1886.0 <sup>a</sup> | 1885.0 | 1885.0  | 1887.1 | 1887.3 | 1887.2  | 1888.0 |
| gdb 2949 | 1878.2 <sup>a</sup> | 1876.2 | 1876.2  | 1878.4 | 1875.5 | 1875.5  | 1878.0 |
| gdb 2950 | 1886.4 <sup>a</sup> | 1883.2 | 1883.2  | 1885.6 | 1886.5 | 1886.5  | 1887.3 |
| gdb 2951 | 1897.6 <sup>a</sup> | 1906.2 | 1906.2  | 1906.4 | 1909.4 | 1909.4  | 1909.7 |
| gdb 2952 | 1898.5 <sup>a</sup> | 1905.6 | 1905.6  | 1907.4 | 1907.9 | 1907.9  | 1908.0 |
| gdb 2953 | 1909.6 <sup>a</sup> | 1907.1 | 1907.1  | 1908.1 | 1905.6 | 1905.6  | 1907.7 |
| gdb 2954 | 1892.4 <sup>a</sup> | 1891.6 | 1891.6  | 1894.9 | 1892.9 | 1892.9  | 1895.3 |
| gdb 2955 | 1896.0 <sup>a</sup> | 1887.8 | 1887.8  | 1889.9 | 1886.0 | 1886.0  | 1888.7 |
| gdb 2956 | 1901.3 <sup>a</sup> | 1906.5 | 1906.5  | 1907.4 | 1910.0 | 1910.0  | 1910.5 |
| gdb 2957 | 1901.8 <sup>a</sup> | 1906.3 | 1906.3  | 1907.6 | 1910.2 | 1910.2  | 1910.9 |
| gdb 2958 | 1912.9 <sup>a</sup> | 1908.4 | 1908.4  | 1908.9 | 1907.4 | 1907.4  | 1909.6 |
| gdb 2959 | 1910.6 <sup>a</sup> | 1905.5 | 1905.5  | 1906.2 | 1904.2 | 1904.2  | 1906.6 |
| gdb 2960 | 1899.3 <sup>a</sup> | 1894.6 | 1894.6  | 1896.9 | 1895.4 | 1895.3  | 1896.7 |
| gdb 2961 | 1893.1 <sup>a</sup> | 1890.3 | 1890.3  | 1891.3 | 1887.5 | 1887.5  | 1887.7 |
| gdb 2962 | 1902.4 <sup>a</sup> | 1894.6 | 1894.6  | 1897.8 | 1895.9 | 1895.9  | 1897.5 |
| gdb 2963 | 1872.6 <sup>a</sup> | 1871.5 | 1871.5  | 1873.6 | 1873.7 | 1873.7  | 1875.0 |
| gdb 2964 | 1877.1 <sup>a</sup> | 1876.0 | 1876.0  | 1877.9 | 1877.1 | 1877.1  | 1877.4 |
| gdb 2965 | 1868.4 <sup>a</sup> | 1861.2 | 1861.2  | 1863.2 | 1860.9 | 1860.8  | 1862.4 |
| gdb 2966 | 1887.5 <sup>a</sup> | 1883.8 | 1883.8  | 1886.3 | 1886.7 | 1886.7  | 1887.3 |
| gdb 2967 | 1903.5 <sup>a</sup> | 1906.8 | 1906.8  | 1907.7 | 1908.8 | 1908.8  | 1908.2 |
| gdb 2968 | 1893.7 <sup>a</sup> | 1899.1 | 1899.0  | 1901.0 | 1898.7 | 1898.7  | 1900.2 |
| gdb 2969 | 1901.2 <sup>a</sup> | 1905.1 | 1905.1  | 1906.2 | 1908.0 | 1908.0  | 1907.9 |
| gdb 2970 | 1876.5 <sup>a</sup> | 1877.9 | 1877.9  | 1880.9 | 1879.6 | 1879.6  | 1880.8 |
| gdb 2971 | 1871.1 <sup>a</sup> | 1859.7 | 1859.7  | 1861.1 | 1859.9 | 1859.9  | 1861.6 |
| gdb 2972 | 1877.1 <sup>a</sup> | 1873.9 | 1873.9  | 1875.4 | 1876.2 | 1876.2  | 1877.0 |
| gdb 2973 | 1894.5 <sup>a</sup> | 1891.3 | 1891.3  | 1895.4 | 1893.0 | 1893.0  | 1895.7 |
| gdb 2974 | 1881.4 <sup>a</sup> | 1878.3 | 1878.3  | 1880.8 | 1877.3 | 1877.3  | 1879.6 |
| gdb 2975 | 1891.4 <sup>a</sup> | 1887.2 | 1887.2  | 1891.1 | 1888.9 | 1888.9  | 1891.4 |
| gdb 2976 | 1877.6 <sup>a</sup> | 1876.2 | 1876.2  | 1878.8 | 1875.5 | 1875.5  | 1878.0 |
| gdb 2977 | 1885.3 <sup>a</sup> | 1884.1 | 1884.1  | 1886.9 | 1886.3 | 1886.3  | 1887.1 |
| gdb 2978 | 1874.9 <sup>a</sup> | 1875.7 | 1875.7  | 1877.3 | 1879.0 | 1879.0  | 1879.5 |
| gdb 2979 | 1870.0 <sup>a</sup> | 1863.8 | 1863.7  | 1865.8 | 1864.2 | 1864.2  | 1865.4 |
| gdb 2980 | 1894.8 <sup>a</sup> | 1891.8 | 1891.8  | 1896.1 | 1893.3 | 1893.3  | 1896.0 |
| gdb 2981 | 1885.6 <sup>a</sup> | 1883.9 | 1883.9  | 1885.2 | 1881.0 | 1881.0  | 1881.6 |
| gdb 2982 | 1862.1 <sup>a</sup> | 1852.8 | 1852.8  | 1851.7 | 1844.4 | 1844.4  | 1842.1 |
| gdb 2983 | 1871.9 <sup>a</sup> | 1861.0 | 1861.0  | 1862.5 | 1855.9 | 1855.9  | 1854.8 |
| gdb 2984 | 1865.2 <sup>a</sup> | 1861.3 | 1861.3  | 1864.3 | 1857.7 | 1857.6  | 1858.0 |
| gdb 2985 | 1883.7 <sup>a</sup> | 1882.0 | 1882.0  | 1883.6 | 1879.4 | 1879.4  | 1881.1 |
| gdb 2986 | 1890.8 <sup>a</sup> | 1888.1 | 1888.1  | 1891.2 | 1889.2 | 1889.1  | 1891.8 |
| gdb 2987 | 1882.7 <sup>a</sup> | 1882.7 | 1882.7  | 1886.0 | 1878.2 | 1878.1  | 1880.0 |

... continued on next page ...

Table S73: ... continued from previous page ...

| Species  | Ref.                | OM2    | OM2-D3T | ODM2   | OM3    | OM3-D3T | ODM3   |
|----------|---------------------|--------|---------|--------|--------|---------|--------|
| gdb 2988 | 1910.1 <sup>a</sup> | 1909.8 | 1909.8  | 1912.1 | 1905.7 | 1905.7  | 1909.3 |
| gdb 2989 | 1899.6 <sup>a</sup> | 1902.1 | 1902.1  | 1903.8 | 1899.4 | 1899.4  | 1900.9 |
| gdb 2990 | 1903.7 <sup>a</sup> | 1908.5 | 1908.4  | 1910.4 | 1908.4 | 1908.4  | 1909.4 |
| gdb 2991 | 1841.6 <sup>a</sup> | 1827.9 | 1827.9  | 1827.3 | 1822.6 | 1822.5  | 1820.9 |
| gdb 2992 | 1846.0 <sup>a</sup> | 1840.2 | 1840.2  | 1839.2 | 1837.8 | 1837.8  | 1835.5 |
| gdb 2993 | 1844.7 <sup>a</sup> | 1832.2 | 1832.2  | 1835.0 | 1833.0 | 1833.0  | 1833.7 |
| gdb 2994 | 1873.6 <sup>a</sup> | 1870.5 | 1870.5  | 1872.3 | 1873.5 | 1873.5  | 1874.6 |
| gdb 2995 | 1873.9 <sup>a</sup> | 1871.2 | 1871.2  | 1873.7 | 1874.8 | 1874.8  | 1876.1 |
| gdb 2996 | 1864.7 <sup>a</sup> | 1856.7 | 1856.7  | 1858.3 | 1857.2 | 1857.2  | 1859.1 |
| gdb 2997 | 1884.4 <sup>a</sup> | 1890.9 | 1890.9  | 1892.8 | 1890.6 | 1890.6  | 1892.5 |
| gdb 2998 | 1892.7 <sup>a</sup> | 1895.0 | 1895.0  | 1896.4 | 1898.8 | 1898.7  | 1899.6 |
| gdb 2999 | 1886.9 <sup>a</sup> | 1877.0 | 1876.9  | 1878.4 | 1875.1 | 1875.1  | 1878.4 |
| gdb 3000 | 1864.6 <sup>a</sup> | 1856.8 | 1856.8  | 1859.0 | 1858.4 | 1858.4  | 1860.7 |
| gdb 3001 | 1867.9 <sup>a</sup> | 1867.8 | 1867.8  | 1869.7 | 1872.2 | 1872.2  | 1873.9 |
| gdb 3002 | 1898.3 <sup>a</sup> | 1895.6 | 1895.6  | 1899.6 | 1896.8 | 1896.8  | 1899.1 |
| gdb 3003 | 1893.6 <sup>a</sup> | 1890.9 | 1890.9  | 1891.9 | 1888.3 | 1888.3  | 1888.7 |
| gdb 3004 | 1906.0 <sup>a</sup> | 1895.6 | 1895.6  | 1897.5 | 1892.9 | 1892.9  | 1895.5 |
| gdb 3005 | 1901.7 <sup>a</sup> | 1894.0 | 1894.0  | 1897.2 | 1895.7 | 1895.7  | 1897.5 |
| gdb 3006 | 1877.1 <sup>a</sup> | 1873.3 | 1873.3  | 1877.1 | 1873.4 | 1873.4  | 1874.8 |
| gdb 3007 | 1872.8 <sup>a</sup> | 1871.3 | 1871.3  | 1873.4 | 1867.5 | 1867.5  | 1867.6 |
| gdb 3008 | 1867.5 <sup>a</sup> | 1855.9 | 1855.9  | 1857.6 | 1850.8 | 1850.8  | 1849.9 |
| gdb 3009 | 1863.2 <sup>a</sup> | 1858.4 | 1858.4  | 1860.4 | 1854.9 | 1854.9  | 1854.3 |
| gdb 3010 | 1864.0 <sup>a</sup> | 1853.7 | 1853.6  | 1854.2 | 1849.2 | 1849.1  | 1847.7 |
| gdb 3011 | 1856.4 <sup>a</sup> | 1847.9 | 1847.9  | 1846.1 | 1839.1 | 1839.1  | 1836.3 |
| gdb 3012 | 1866.3 <sup>a</sup> | 1859.4 | 1859.4  | 1863.0 | 1860.1 | 1860.1  | 1861.0 |
| gdb 3013 | 1847.6 <sup>a</sup> | 1824.8 | 1824.8  | 1826.6 | 1821.9 | 1821.9  | 1820.3 |
| gdb 3014 | 1835.1 <sup>a</sup> | 1822.3 | 1822.2  | 1827.4 | 1820.7 | 1820.6  | 1818.7 |
| gdb 3015 | 1842.7 <sup>a</sup> | 1819.1 | 1819.1  | 1819.8 | 1817.1 | 1817.1  | 1815.1 |
| gdb 3016 | 1831.0 <sup>a</sup> | 1814.9 | 1814.9  | 1812.2 | 1807.9 | 1807.8  | 1802.8 |
| gdb 3017 | 1846.9 <sup>a</sup> | 1828.3 | 1828.3  | 1833.6 | 1831.5 | 1831.5  | 1832.6 |
| gdb 3018 | 1866.5 <sup>a</sup> | 1851.9 | 1851.9  | 1855.1 | 1855.2 | 1855.2  | 1857.4 |
| gdb 3019 | 1864.6 <sup>a</sup> | 1848.9 | 1848.9  | 1853.0 | 1852.6 | 1852.5  | 1855.0 |
| gdb 3020 | 1855.4 <sup>a</sup> | 1845.8 | 1845.8  | 1846.4 | 1845.0 | 1845.0  | 1844.8 |
| gdb 3021 | 1872.5 <sup>a</sup> | 1871.2 | 1871.2  | 1873.3 | 1867.6 | 1867.6  | 1867.5 |
| gdb 3022 | 1876.8 <sup>a</sup> | 1873.3 | 1873.2  | 1877.1 | 1873.5 | 1873.5  | 1874.9 |
| gdb 3023 | 1889.6 <sup>a</sup> | 1886.3 | 1886.3  | 1889.7 | 1881.5 | 1881.5  | 1883.3 |
| gdb 3024 | 1892.0 <sup>a</sup> | 1891.7 | 1891.7  | 1896.6 | 1891.0 | 1891.0  | 1893.2 |
| gdb 3025 | 1897.6 <sup>a</sup> | 1895.7 | 1895.7  | 1899.7 | 1896.8 | 1896.8  | 1899.4 |
| gdb 3026 | 1910.0 <sup>a</sup> | 1898.5 | 1898.5  | 1900.2 | 1896.1 | 1896.1  | 1898.6 |
| gdb 3027 | 1899.3 <sup>a</sup> | 1895.3 | 1895.3  | 1898.7 | 1896.8 | 1896.8  | 1899.0 |
| gdb 3028 | 1893.1 <sup>a</sup> | 1890.0 | 1890.0  | 1890.8 | 1887.7 | 1887.7  | 1888.0 |
| gdb 3029 | 1886.9 <sup>a</sup> | 1885.4 | 1885.4  | 1888.8 | 1881.2 | 1881.2  | 1883.1 |
| gdb 3030 | 1893.4 <sup>a</sup> | 1892.2 | 1892.2  | 1897.1 | 1891.4 | 1891.4  | 1893.7 |
| gdb 3031 | 1871.9 <sup>a</sup> | 1858.6 | 1858.6  | 1861.9 | 1861.0 | 1861.0  | 1862.1 |
| gdb 3032 | 1859.3 <sup>a</sup> | 1850.5 | 1850.5  | 1851.2 | 1848.8 | 1848.7  | 1847.5 |
| gdb 3033 | 1831.0 <sup>a</sup> | 1814.8 | 1814.8  | 1813.1 | 1807.4 | 1807.3  | 1803.4 |
| gdb 3034 | 1842.6 <sup>a</sup> | 1821.4 | 1821.4  | 1823.3 | 1818.4 | 1818.3  | 1817.1 |
| gdb 3035 | 1840.5 <sup>a</sup> | 1826.0 | 1826.0  | 1828.3 | 1823.6 | 1823.6  | 1821.7 |
| gdb 3036 | 1859.7 <sup>a</sup> | 1847.9 | 1847.9  | 1851.1 | 1850.7 | 1850.7  | 1852.4 |
| gdb 3037 | 1851.7 <sup>a</sup> | 1842.8 | 1842.7  | 1843.0 | 1841.2 | 1841.2  | 1840.1 |
| gdb 3038 | 1882.8 <sup>a</sup> | 1878.3 | 1878.3  | 1880.8 | 1876.4 | 1876.4  | 1879.2 |
| gdb 3039 | 1883.1 <sup>a</sup> | 1880.2 | 1880.2  | 1882.2 | 1878.1 | 1878.1  | 1880.3 |
| gdb 3040 | 1885.6 <sup>a</sup> | 1882.3 | 1882.3  | 1883.0 | 1879.4 | 1879.4  | 1879.6 |
| gdb 3041 | 1895.0 <sup>a</sup> | 1888.9 | 1888.9  | 1891.4 | 1889.5 | 1889.5  | 1891.5 |
| gdb 3042 | 1876.6 <sup>a</sup> | 1851.3 | 1851.3  | 1855.1 | 1850.3 | 1850.3  | 1855.2 |
| gdb 3043 | 1854.6 <sup>a</sup> | 1844.3 | 1844.3  | 1845.5 | 1843.6 | 1843.6  | 1843.8 |
| gdb 3044 | 1864.9 <sup>a</sup> | 1850.4 | 1850.4  | 1855.2 | 1854.0 | 1854.0  | 1856.8 |
| gdb 3045 | 1837.4 <sup>a</sup> | 1819.9 | 1819.9  | 1824.6 | 1816.1 | 1816.1  | 1819.6 |
| gdb 3046 | 1835.5 <sup>a</sup> | 1822.9 | 1822.8  | 1825.1 | 1818.0 | 1818.0  | 1819.0 |
| gdb 3047 | 1848.2 <sup>a</sup> | 1838.3 | 1838.3  | 1844.5 | 1836.7 | 1836.7  | 1840.1 |
| gdb 3048 | 1847.8 <sup>a</sup> | 1834.8 | 1834.8  | 1838.4 | 1833.4 | 1833.4  | 1836.1 |
| gdb 3049 | 1847.9 <sup>a</sup> | 1834.5 | 1834.5  | 1839.8 | 1833.2 | 1833.2  | 1836.3 |
| gdb 3050 | 1851.0 <sup>a</sup> | 1840.9 | 1840.9  | 1845.1 | 1838.9 | 1838.9  | 1839.7 |
| gdb 3051 | 1836.9 <sup>a</sup> | 1820.9 | 1820.9  | 1825.0 | 1815.6 | 1815.6  | 1820.0 |
| gdb 3052 | 1837.1 <sup>a</sup> | 1824.9 | 1824.9  | 1826.5 | 1819.4 | 1819.4  | 1819.8 |

... continued on next page ...

Table S73: ... continued from previous page ...

| Species  | Ref.                | OM2    | OM2-D3T | ODM2   | OM3    | OM3-D3T | ODM3   |
|----------|---------------------|--------|---------|--------|--------|---------|--------|
| gdb 3053 | 1827.1 <sup>a</sup> | 1814.6 | 1814.6  | 1816.4 | 1810.9 | 1810.9  | 1811.8 |
| gdb 3054 | 1845.5 <sup>a</sup> | 1830.1 | 1830.1  | 1835.8 | 1830.0 | 1830.0  | 1833.6 |
| gdb 3055 | 1844.4 <sup>a</sup> | 1829.0 | 1829.0  | 1834.3 | 1829.3 | 1829.3  | 1832.9 |
| gdb 3056 | 1845.4 <sup>a</sup> | 1828.5 | 1828.5  | 1834.4 | 1828.3 | 1828.3  | 1831.8 |
| gdb 3057 | 1837.3 <sup>a</sup> | 1822.9 | 1822.9  | 1825.1 | 1822.1 | 1822.1  | 1821.1 |
| gdb 3058 | 1895.3 <sup>a</sup> | 1893.6 | 1893.6  | 1896.5 | 1894.5 | 1894.4  | 1896.5 |
| gdb 3059 | 1894.6 <sup>a</sup> | 1891.5 | 1891.5  | 1894.0 | 1892.6 | 1892.6  | 1894.2 |
| gdb 3060 | 1887.3 <sup>a</sup> | 1886.4 | 1886.4  | 1887.7 | 1883.5 | 1883.5  | 1884.1 |
| gdb 3061 | 1892.3 <sup>a</sup> | 1897.1 | 1897.1  | 1900.4 | 1894.8 | 1894.8  | 1898.0 |
| gdb 3062 | 1910.5 <sup>a</sup> | 1905.6 | 1905.6  | 1907.6 | 1901.9 | 1901.9  | 1905.5 |
| gdb 3063 | 1896.7 <sup>a</sup> | 1898.4 | 1898.4  | 1900.0 | 1896.1 | 1896.1  | 1897.2 |
| gdb 3064 | 1901.8 <sup>a</sup> | 1906.8 | 1906.8  | 1908.9 | 1907.6 | 1907.6  | 1908.9 |
| gdb 3065 | 1869.1 <sup>a</sup> | 1869.4 | 1869.4  | 1871.4 | 1866.2 | 1866.2  | 1866.1 |
| gdb 3066 | 1883.9 <sup>a</sup> | 1883.9 | 1883.9  | 1887.3 | 1880.5 | 1880.5  | 1882.3 |
| gdb 3067 | 1880.5 <sup>a</sup> | 1880.2 | 1880.2  | 1882.6 | 1875.6 | 1875.6  | 1877.5 |
| gdb 3068 | 1882.2 <sup>a</sup> | 1881.0 | 1881.0  | 1884.8 | 1877.0 | 1877.0  | 1879.3 |
| gdb 3069 | 1886.5 <sup>a</sup> | 1888.8 | 1888.8  | 1894.6 | 1887.7 | 1887.6  | 1890.6 |
| gdb 3070 | 1883.1 <sup>a</sup> | 1881.9 | 1881.9  | 1883.3 | 1879.4 | 1879.4  | 1880.9 |
| gdb 3071 | 1881.3 <sup>a</sup> | 1879.0 | 1879.0  | 1882.2 | 1877.6 | 1877.6  | 1880.7 |
| gdb 3072 | 1892.8 <sup>a</sup> | 1886.6 | 1886.6  | 1890.9 | 1887.9 | 1887.9  | 1890.9 |
| gdb 3073 | 1857.8 <sup>a</sup> | 1850.6 | 1850.6  | 1851.7 | 1846.7 | 1846.7  | 1846.2 |
| gdb 3074 | 1867.3 <sup>a</sup> | 1855.6 | 1855.5  | 1857.2 | 1851.0 | 1851.0  | 1850.3 |
| gdb 3075 | 1854.8 <sup>a</sup> | 1845.6 | 1845.6  | 1844.1 | 1837.2 | 1837.2  | 1834.7 |
| gdb 3076 | 1857.5 <sup>a</sup> | 1851.2 | 1851.2  | 1853.0 | 1849.5 | 1849.5  | 1849.7 |
| gdb 3077 | 1864.9 <sup>a</sup> | 1855.7 | 1855.7  | 1859.3 | 1858.1 | 1858.0  | 1859.5 |
| gdb 3078 | 1861.8 <sup>a</sup> | 1852.0 | 1852.0  | 1850.4 | 1843.9 | 1843.8  | 1841.2 |
| gdb 3079 | 1867.7 <sup>a</sup> | 1857.6 | 1857.6  | 1862.7 | 1857.0 | 1857.0  | 1859.1 |
| gdb 3080 | 1872.3 <sup>a</sup> | 1860.8 | 1860.8  | 1862.5 | 1856.1 | 1856.0  | 1855.3 |
| gdb 3081 | 1868.1 <sup>a</sup> | 1861.6 | 1861.6  | 1864.6 | 1857.9 | 1857.9  | 1858.0 |
| gdb 3082 | 1870.5 <sup>a</sup> | 1863.9 | 1863.9  | 1863.0 | 1855.9 | 1855.9  | 1854.7 |
| gdb 3083 | 1864.3 <sup>a</sup> | 1866.3 | 1866.3  | 1871.6 | 1864.4 | 1864.4  | 1867.7 |
| gdb 3084 | 1878.7 <sup>a</sup> | 1874.0 | 1874.0  | 1875.1 | 1868.6 | 1868.6  | 1867.5 |
| gdb 3085 | 1873.4 <sup>a</sup> | 1870.9 | 1870.9  | 1873.9 | 1868.4 | 1868.4  | 1869.2 |
| gdb 3086 | 1851.4 <sup>a</sup> | 1849.6 | 1849.6  | 1851.7 | 1842.1 | 1842.1  | 1843.5 |
| gdb 3087 | 1858.2 <sup>a</sup> | 1853.2 | 1853.2  | 1857.2 | 1849.1 | 1849.1  | 1851.1 |
| gdb 3088 | 1855.7 <sup>a</sup> | 1853.6 | 1853.5  | 1857.5 | 1849.4 | 1849.4  | 1850.9 |
| gdb 3089 | 1861.0 <sup>a</sup> | 1850.4 | 1850.4  | 1853.0 | 1843.7 | 1843.7  | 1846.0 |
| gdb 3090 | 1871.5 <sup>a</sup> | 1856.8 | 1856.8  | 1862.2 | 1853.8 | 1853.8  | 1857.8 |
| gdb 3091 | 1868.6 <sup>a</sup> | 1864.7 | 1864.7  | 1869.1 | 1861.1 | 1861.1  | 1862.6 |
| gdb 3092 | 1860.9 <sup>a</sup> | 1849.0 | 1849.0  | 1852.6 | 1851.5 | 1851.4  | 1854.1 |
| gdb 3093 | 1861.8 <sup>a</sup> | 1848.1 | 1848.1  | 1851.6 | 1849.8 | 1849.8  | 1851.4 |
| gdb 3094 | 1849.6 <sup>a</sup> | 1843.7 | 1843.7  | 1844.3 | 1841.5 | 1841.5  | 1841.3 |
| gdb 3095 | 1828.8 <sup>a</sup> | 1811.7 | 1811.7  | 1813.3 | 1806.4 | 1806.3  | 1806.4 |
| gdb 3096 | 1825.6 <sup>a</sup> | 1810.2 | 1810.2  | 1811.6 | 1805.5 | 1805.5  | 1806.1 |
| gdb 3097 | 1847.3 <sup>a</sup> | 1824.4 | 1824.3  | 1829.7 | 1824.0 | 1824.0  | 1827.6 |
| gdb 3098 | 1841.5 <sup>a</sup> | 1820.8 | 1820.8  | 1825.7 | 1820.4 | 1820.4  | 1824.3 |
| gdb 3099 | 1834.4 <sup>a</sup> | 1824.4 | 1824.3  | 1826.9 | 1821.8 | 1821.8  | 1821.6 |
| gdb 3100 | 1868.1 <sup>a</sup> | 1857.6 | 1857.6  | 1862.1 | 1858.6 | 1860.6  | 1860.7 |
| gdb 3101 | 1853.6 <sup>a</sup> | 1847.2 | 1847.2  | 1847.9 | 1846.2 | 1846.2  | 1845.5 |
| gdb 3102 | 1826.3 <sup>a</sup> | 1811.5 | 1811.5  | 1809.6 | 1804.8 | 1804.8  | 1801.0 |
| gdb 3103 | 1838.0 <sup>a</sup> | 1818.9 | 1818.9  | 1820.7 | 1816.4 | 1816.3  | 1815.8 |
| gdb 3104 | 1829.7 <sup>a</sup> | 1818.9 | 1818.9  | 1821.9 | 1816.1 | 1816.1  | 1814.9 |
| gdb 3105 | 1871.1 <sup>a</sup> | 1848.5 | 1848.2  | 1852.3 | 1847.8 | 1847.6  | 1853.0 |
| gdb 3106 | 1848.1 <sup>a</sup> | 1839.2 | 1839.2  | 1840.1 | 1839.3 | 1839.3  | 1839.4 |
| gdb 3107 | 1860.4 <sup>a</sup> | 1847.3 | 1847.3  | 1852.5 | 1850.4 | 1850.3  | 1853.5 |
| gdb 3108 | 1884.3 <sup>a</sup> | 1884.0 | 1884.0  | 1887.4 | 1880.7 | 1880.7  | 1882.4 |
| gdb 3109 | 1874.5 <sup>a</sup> | 1879.7 | 1879.7  | 1883.7 | 1876.5 | 1876.5  | 1880.0 |
| gdb 3110 | 1881.5 <sup>a</sup> | 1880.4 | 1880.3  | 1884.5 | 1878.0 | 1878.0  | 1880.4 |
| gdb 3111 | 1900.3 <sup>a</sup> | 1902.8 | 1902.8  | 1904.3 | 1900.8 | 1900.8  | 1902.4 |
| gdb 3112 | 1910.9 <sup>a</sup> | 1908.5 | 1908.5  | 1910.6 | 1905.1 | 1905.0  | 1908.7 |
| gdb 3113 | 1905.3 <sup>a</sup> | 1909.4 | 1909.4  | 1911.6 | 1910.3 | 1910.3  | 1911.8 |
| gdb 3114 | 1885.5 <sup>a</sup> | 1878.8 | 1878.8  | 1881.5 | 1877.3 | 1877.3  | 1879.5 |
| gdb 3115 | 1856.2 <sup>a</sup> | 1848.7 | 1848.7  | 1848.6 | 1844.6 | 1844.6  | 1841.3 |
| gdb 3116 | 1854.8 <sup>a</sup> | 1849.8 | 1849.8  | 1849.9 | 1845.6 | 1845.6  | 1842.4 |
| gdb 3117 | 1855.4 <sup>a</sup> | 1845.1 | 1845.1  | 1844.8 | 1842.5 | 1842.5  | 1839.4 |

... continued on next page ...

Table S73: ... continued from previous page ...

| Species  | Ref.                | OM2    | OM2-D3T | ODM2   | OM3    | OM3-D3T | ODM3   |
|----------|---------------------|--------|---------|--------|--------|---------|--------|
| gdb 3118 | 1852.1 <sup>a</sup> | 1841.9 | 1841.9  | 1838.0 | 1832.6 | 1832.6  | 1826.7 |
| gdb 3119 | 1858.1 <sup>a</sup> | 1853.4 | 1853.4  | 1857.2 | 1855.8 | 1855.8  | 1855.6 |
| gdb 3120 | 1874.7 <sup>a</sup> | 1876.2 | 1876.2  | 1879.0 | 1877.7 | 1877.7  | 1879.2 |
| gdb 3121 | 1873.4 <sup>a</sup> | 1872.3 | 1872.3  | 1874.8 | 1875.5 | 1875.5  | 1876.8 |
| gdb 3122 | 1873.8 <sup>a</sup> | 1871.0 | 1871.0  | 1869.6 | 1867.4 | 1867.4  | 1865.6 |
| gdb 3123 | 1887.3 <sup>a</sup> | 1883.7 | 1883.7  | 1882.1 | 1878.7 | 1878.7  | 1876.2 |
| gdb 3124 | 1888.0 <sup>a</sup> | 1887.7 | 1887.7  | 1890.7 | 1889.1 | 1889.1  | 1889.7 |
| gdb 3125 | 1902.1 <sup>a</sup> | 1908.3 | 1908.3  | 1908.9 | 1910.0 | 1910.0  | 1909.7 |
| gdb 3126 | 1913.1 <sup>a</sup> | 1910.0 | 1910.0  | 1910.6 | 1908.5 | 1908.5  | 1910.5 |
| gdb 3127 | 1901.8 <sup>a</sup> | 1907.6 | 1907.6  | 1909.2 | 1910.8 | 1910.8  | 1911.3 |
| gdb 3128 | 1903.9 <sup>a</sup> | 1906.1 | 1906.1  | 1904.1 | 1902.8 | 1902.8  | 1900.4 |
| gdb 3129 | 1879.4 <sup>a</sup> | 1878.2 | 1878.2  | 1880.9 | 1879.8 | 1879.8  | 1880.7 |
| gdb 3130 | 1879.9 <sup>a</sup> | 1879.1 | 1879.1  | 1880.9 | 1879.9 | 1879.9  | 1880.4 |
| gdb 3131 | 1873.4 <sup>a</sup> | 1870.3 | 1870.3  | 1868.8 | 1866.1 | 1866.1  | 1863.8 |
| gdb 3132 | 1902.9 <sup>a</sup> | 1909.4 | 1909.4  | 1911.5 | 1910.5 | 1910.5  | 1910.3 |
| gdb 3133 | 1900.6 <sup>a</sup> | 1908.5 | 1908.5  | 1909.5 | 1909.6 | 1909.6  | 1908.9 |
| gdb 3134 | 1896.6 <sup>a</sup> | 1900.1 | 1900.1  | 1898.2 | 1895.7 | 1895.7  | 1892.8 |
| gdb 3135 | 1886.1 <sup>a</sup> | 1885.9 | 1885.9  | 1884.9 | 1880.6 | 1880.6  | 1877.6 |
| gdb 3136 | 1900.1 <sup>a</sup> | 1908.4 | 1908.4  | 1909.3 | 1909.5 | 1909.5  | 1908.9 |
| gdb 3137 | 1899.3 <sup>a</sup> | 1904.1 | 1904.1  | 1902.3 | 1900.1 | 1900.1  | 1897.5 |
| gdb 3138 | 1875.2 <sup>a</sup> | 1879.1 | 1879.1  | 1882.4 | 1878.7 | 1878.7  | 1879.8 |
| gdb 3139 | 1877.3 <sup>a</sup> | 1877.6 | 1877.6  | 1879.4 | 1877.9 | 1877.9  | 1878.0 |
| gdb 3140 | 1870.5 <sup>a</sup> | 1869.4 | 1869.4  | 1868.2 | 1864.5 | 1864.5  | 1862.8 |
| gdb 3141 | 1850.0 <sup>a</sup> | 1840.7 | 1840.7  | 1840.7 | 1833.1 | 1833.1  | 1832.1 |
| gdb 3142 | 1846.2 <sup>a</sup> | 1838.4 | 1838.4  | 1838.0 | 1831.0 | 1831.0  | 1830.3 |
| gdb 3143 | 1859.9 <sup>a</sup> | 1851.5 | 1851.5  | 1855.6 | 1849.3 | 1849.2  | 1850.7 |
| gdb 3144 | 1850.5 <sup>a</sup> | 1846.2 | 1846.2  | 1848.9 | 1843.9 | 1843.9  | 1845.8 |
| gdb 3145 | 1852.1 <sup>a</sup> | 1852.2 | 1852.1  | 1853.5 | 1846.6 | 1846.6  | 1844.7 |
| gdb 3146 | 1879.9 <sup>a</sup> | 1884.0 | 1883.9  | 1887.3 | 1884.6 | 1884.6  | 1885.0 |
| gdb 3147 | 1873.5 <sup>a</sup> | 1874.4 | 1874.4  | 1873.2 | 1870.1 | 1870.1  | 1867.7 |
| gdb 3148 | 1846.1 <sup>a</sup> | 1838.9 | 1838.9  | 1835.2 | 1829.5 | 1829.5  | 1824.1 |
| gdb 3149 | 1849.6 <sup>a</sup> | 1845.3 | 1845.2  | 1845.9 | 1841.0 | 1840.9  | 1838.8 |
| gdb 3150 | 1851.8 <sup>a</sup> | 1848.1 | 1848.1  | 1848.6 | 1843.7 | 1843.6  | 1840.7 |
| gdb 3151 | 1887.5 <sup>a</sup> | 1879.1 | 1879.1  | 1880.5 | 1876.8 | 1876.7  | 1879.8 |
| gdb 3152 | 1867.8 <sup>a</sup> | 1866.7 | 1866.7  | 1865.7 | 1863.8 | 1863.8  | 1862.4 |
| gdb 3153 | 1871.9 <sup>a</sup> | 1873.5 | 1873.5  | 1877.0 | 1876.3 | 1876.3  | 1878.0 |
| gdb 3154 | 1874.3 <sup>a</sup> | 1874.7 | 1874.7  | 1874.3 | 1869.7 | 1869.7  | 1866.9 |
| gdb 3155 | 1882.3 <sup>a</sup> | 1877.4 | 1877.4  | 1876.9 | 1872.8 | 1872.8  | 1869.6 |
| gdb 3156 | 1871.0 <sup>a</sup> | 1866.1 | 1866.1  | 1861.7 | 1856.4 | 1856.4  | 1851.1 |
| gdb 3157 | 1877.8 <sup>a</sup> | 1870.6 | 1870.6  | 1869.8 | 1867.6 | 1867.6  | 1864.9 |
| gdb 3158 | 1873.5 <sup>a</sup> | 1878.2 | 1878.2  | 1881.3 | 1880.3 | 1880.3  | 1880.1 |
| gdb 3159 | 1875.1 <sup>a</sup> | 1874.5 | 1874.5  | 1873.9 | 1869.5 | 1869.5  | 1866.6 |
| gdb 3160 | 1877.8 <sup>a</sup> | 1876.9 | 1876.9  | 1876.2 | 1871.9 | 1871.9  | 1868.6 |
| gdb 3161 | 1876.2 <sup>a</sup> | 1870.2 | 1870.1  | 1869.4 | 1866.8 | 1866.8  | 1864.4 |
| gdb 3162 | 1871.3 <sup>a</sup> | 1865.7 | 1865.6  | 1861.2 | 1855.9 | 1855.9  | 1850.7 |
| gdb 3163 | 1874.1 <sup>a</sup> | 1877.1 | 1877.1  | 1879.7 | 1878.8 | 1878.8  | 1878.3 |
| gdb 3164 | 1870.6 <sup>a</sup> | 1863.3 | 1863.3  | 1862.6 | 1854.8 | 1854.8  | 1853.6 |
| gdb 3165 | 1875.2 <sup>a</sup> | 1873.6 | 1873.6  | 1877.0 | 1869.9 | 1869.9  | 1871.1 |
| gdb 3166 | 1878.0 <sup>a</sup> | 1874.9 | 1874.9  | 1875.8 | 1869.2 | 1869.2  | 1867.7 |
| gdb 3167 | 1872.9 <sup>a</sup> | 1867.5 | 1867.5  | 1867.1 | 1860.0 | 1860.0  | 1859.4 |
| gdb 3168 | 1870.5 <sup>a</sup> | 1865.7 | 1865.7  | 1865.2 | 1858.2 | 1858.2  | 1857.4 |
| gdb 3169 | 1876.4 <sup>a</sup> | 1875.8 | 1875.8  | 1879.3 | 1873.5 | 1873.5  | 1875.0 |
| gdb 3170 | 1874.8 <sup>a</sup> | 1873.8 | 1873.8  | 1876.0 | 1871.5 | 1871.5  | 1873.1 |
| gdb 3171 | 1876.6 <sup>a</sup> | 1879.2 | 1879.2  | 1878.9 | 1873.8 | 1873.8  | 1871.5 |
| gdb 3172 | 1873.0 <sup>a</sup> | 1868.3 | 1868.3  | 1863.9 | 1858.8 | 1858.8  | 1853.3 |
| gdb 3173 | 1873.9 <sup>a</sup> | 1876.8 | 1876.8  | 1876.2 | 1872.1 | 1872.1  | 1868.6 |
| gdb 3174 | 1869.4 <sup>a</sup> | 1871.1 | 1871.1  | 1874.6 | 1871.1 | 1871.1  | 1872.1 |
| gdb 3175 | 1875.3 <sup>a</sup> | 1876.0 | 1876.0  | 1875.6 | 1871.3 | 1871.3  | 1868.1 |
| gdb 3176 | 1885.6 <sup>a</sup> | 1891.5 | 1891.5  | 1893.4 | 1890.6 | 1890.6  | 1892.6 |
| gdb 3177 | 1893.7 <sup>a</sup> | 1893.2 | 1893.2  | 1891.6 | 1890.0 | 1890.0  | 1888.5 |
| gdb 3178 | 1895.6 <sup>a</sup> | 1900.8 | 1900.8  | 1903.1 | 1902.6 | 1902.5  | 1903.1 |
| gdb 3179 | 1873.2 <sup>a</sup> | 1867.6 | 1867.6  | 1863.2 | 1858.9 | 1858.9  | 1853.4 |
| gdb 3180 | 1876.8 <sup>a</sup> | 1874.0 | 1874.0  | 1873.0 | 1870.5 | 1870.4  | 1866.7 |
| gdb 3181 | 1865.2 <sup>a</sup> | 1867.4 | 1867.4  | 1869.7 | 1866.9 | 1866.9  | 1868.1 |
| gdb 3182 | 1887.0 <sup>a</sup> | 1885.1 | 1885.1  | 1883.6 | 1880.7 | 1880.6  | 1878.1 |

... continued on next page ...

Table S73: ... continued from previous page ...

| Species  | Ref.                | OM2    | OM2-D3T | ODM2   | OM3    | OM3-D3T | ODM3   |
|----------|---------------------|--------|---------|--------|--------|---------|--------|
| gdb 3183 | 1907.4 <sup>a</sup> | 1906.4 | 1906.4  | 1906.9 | 1903.2 | 1903.2  | 1905.2 |
| gdb 3184 | 1890.7 <sup>a</sup> | 1895.7 | 1895.7  | 1895.7 | 1896.8 | 1895.1  | 1896.8 |
| gdb 3185 | 1898.1 <sup>a</sup> | 1901.2 | 1901.2  | 1898.8 | 1897.7 | 1897.7  | 1894.6 |
| gdb 3186 | 1901.2 <sup>a</sup> | 1906.8 | 1906.8  | 1907.6 | 1908.2 | 1908.2  | 1907.5 |
| gdb 3187 | 1859.7 <sup>a</sup> | 1845.0 | 1845.0  | 1849.7 | 1848.4 | 1848.4  | 1849.7 |
| gdb 3188 | 1858.7 <sup>a</sup> | 1844.7 | 1844.7  | 1849.1 | 1848.0 | 1848.0  | 1849.2 |
| gdb 3189 | 1858.4 <sup>a</sup> | 1837.4 | 1837.4  | 1840.8 | 1837.6 | 1837.6  | 1838.8 |
| gdb 3190 | 1857.3 <sup>a</sup> | 1838.8 | 1838.8  | 1843.0 | 1843.3 | 1843.2  | 1844.6 |
| gdb 3191 | 1851.4 <sup>a</sup> | 1831.7 | 1831.7  | 1834.6 | 1833.1 | 1833.1  | 1834.3 |
| gdb 3192 | 1867.2 <sup>a</sup> | 1855.3 | 1855.3  | 1858.5 | 1852.4 | 1852.3  | 1854.0 |
| gdb 3193 | 1873.4 <sup>a</sup> | 1860.3 | 1860.3  | 1864.7 | 1857.5 | 1857.5  | 1859.4 |
| gdb 3194 | 1868.4 <sup>a</sup> | 1857.4 | 1857.3  | 1861.2 | 1854.5 | 1854.5  | 1856.2 |
| gdb 3195 | 1864.3 <sup>a</sup> | 1853.3 | 1853.3  | 1855.7 | 1846.8 | 1846.8  | 1847.9 |
| gdb 3196 | 1873.8 <sup>a</sup> | 1862.5 | 1862.5  | 1868.5 | 1862.8 | 1862.8  | 1865.8 |
| gdb 3197 | 1862.7 <sup>a</sup> | 1858.1 | 1858.1  | 1862.3 | 1854.7 | 1854.7  | 1857.3 |
| gdb 3198 | 1867.2 <sup>a</sup> | 1867.7 | 1867.7  | 1872.7 | 1866.7 | 1866.7  | 1869.2 |
| gdb 3199 | 1870.0 <sup>a</sup> | 1858.3 | 1858.3  | 1861.6 | 1855.6 | 1855.6  | 1857.6 |
| gdb 3200 | 1873.4 <sup>a</sup> | 1862.4 | 1862.4  | 1867.1 | 1859.8 | 1859.7  | 1862.0 |
| gdb 3201 | 1873.0 <sup>a</sup> | 1862.9 | 1862.9  | 1869.1 | 1863.4 | 1863.4  | 1866.4 |
| gdb 3202 | 1865.1 <sup>a</sup> | 1863.5 | 1863.5  | 1865.6 | 1864.2 | 1864.1  | 1865.3 |
| gdb 3203 | 1876.3 <sup>a</sup> | 1872.5 | 1872.5  | 1871.3 | 1869.6 | 1869.6  | 1866.8 |
| gdb 3204 | 1871.0 <sup>a</sup> | 1872.2 | 1872.2  | 1874.2 | 1876.1 | 1876.1  | 1876.1 |
| gdb 3205 | 1854.0 <sup>a</sup> | 1843.6 | 1843.6  | 1842.7 | 1840.8 | 1840.8  | 1837.9 |
| gdb 3206 | 1845.1 <sup>a</sup> | 1830.1 | 1830.1  | 1832.4 | 1832.0 | 1832.0  | 1832.3 |
| gdb 3207 | 1854.8 <sup>a</sup> | 1844.2 | 1844.2  | 1843.9 | 1841.9 | 1841.9  | 1839.0 |
| gdb 3208 | 1845.1 <sup>a</sup> | 1831.0 | 1831.0  | 1833.8 | 1833.1 | 1833.1  | 1833.4 |
| gdb 3209 | 1855.0 <sup>a</sup> | 1847.1 | 1847.1  | 1850.1 | 1850.6 | 1850.6  | 1850.4 |
| gdb 3210 | 1865.6 <sup>a</sup> | 1865.4 | 1865.4  | 1867.9 | 1867.0 | 1866.9  | 1867.9 |
| gdb 3211 | 1872.8 <sup>a</sup> | 1871.3 | 1871.3  | 1869.9 | 1869.0 | 1869.0  | 1866.0 |
| gdb 3212 | 1835.9 <sup>a</sup> | 1823.2 | 1823.2  | 1825.5 | 1818.4 | 1818.4  | 1819.5 |
| gdb 3213 | 1850.9 <sup>a</sup> | 1835.7 | 1835.7  | 1841.3 | 1834.4 | 1834.4  | 1837.9 |
| gdb 3214 | 1851.1 <sup>a</sup> | 1841.7 | 1841.7  | 1846.2 | 1840.0 | 1840.0  | 1841.4 |
| gdb 3215 | 1849.7 <sup>a</sup> | 1835.8 | 1835.8  | 1839.5 | 1834.0 | 1833.9  | 1836.7 |
| gdb 3216 | 1844.5 <sup>a</sup> | 1830.0 | 1830.0  | 1833.2 | 1826.8 | 1826.8  | 1829.6 |
| gdb 3217 | 1852.2 <sup>a</sup> | 1846.2 | 1846.2  | 1848.9 | 1845.4 | 1845.4  | 1847.3 |
| gdb 3218 | 1846.2 <sup>a</sup> | 1841.2 | 1841.2  | 1843.8 | 1840.8 | 1840.7  | 1843.0 |
| gdb 3219 | 1850.3 <sup>a</sup> | 1840.3 | 1840.3  | 1844.1 | 1840.6 | 1840.6  | 1842.1 |
| gdb 3220 | 1858.1 <sup>a</sup> | 1854.0 | 1854.0  | 1858.7 | 1850.4 | 1850.4  | 1853.7 |
| gdb 3221 | 1864.0 <sup>a</sup> | 1864.8 | 1864.8  | 1870.4 | 1863.9 | 1863.9  | 1866.5 |
| gdb 3222 | 1863.3 <sup>a</sup> | 1854.3 | 1854.3  | 1858.5 | 1851.9 | 1851.9  | 1854.3 |
| gdb 3223 | 1868.1 <sup>a</sup> | 1859.8 | 1859.8  | 1867.0 | 1860.4 | 1860.4  | 1863.9 |
| gdb 3224 | 1861.6 <sup>a</sup> | 1860.8 | 1860.8  | 1863.2 | 1861.0 | 1861.0  | 1862.3 |
| gdb 3225 | 1868.7 <sup>a</sup> | 1869.7 | 1869.7  | 1871.6 | 1873.6 | 1873.6  | 1873.7 |
| gdb 3226 | 1894.7 <sup>a</sup> | 1885.3 | 1885.3  | 1888.9 | 1883.8 | 1883.8  | 1885.7 |
| gdb 3227 | 1889.9 <sup>a</sup> | 1880.4 | 1880.4  | 1883.7 | 1879.8 | 1879.8  | 1881.8 |
| gdb 3228 | 1887.2 <sup>a</sup> | 1879.4 | 1879.4  | 1881.5 | 1872.4 | 1872.4  | 1875.3 |
| gdb 3229 | 1899.3 <sup>a</sup> | 1889.9 | 1889.9  | 1892.5 | 1891.4 | 1891.3  | 1892.4 |
| gdb 3230 | 1856.4 <sup>a</sup> | 1842.5 | 1842.5  | 1847.1 | 1845.9 | 1845.9  | 1847.4 |
| gdb 3231 | 1858.3 <sup>a</sup> | 1844.3 | 1844.3  | 1848.6 | 1847.6 | 1847.6  | 1848.8 |
| gdb 3232 | 1855.6 <sup>a</sup> | 1835.9 | 1835.9  | 1838.8 | 1835.9 | 1835.8  | 1836.9 |
| gdb 3233 | 1854.7 <sup>a</sup> | 1838.9 | 1838.9  | 1843.1 | 1843.4 | 1843.3  | 1844.7 |
| gdb 3234 | 1847.4 <sup>a</sup> | 1831.0 | 1831.0  | 1833.7 | 1831.3 | 1831.3  | 1832.4 |
| gdb 3235 | 1848.1 <sup>a</sup> | 1830.4 | 1830.4  | 1833.2 | 1831.0 | 1831.0  | 1832.3 |
| gdb 3236 | 1866.6 <sup>a</sup> | 1856.0 | 1856.0  | 1859.4 | 1852.7 | 1852.7  | 1854.7 |
| gdb 3237 | 1873.5 <sup>a</sup> | 1860.8 | 1860.8  | 1865.1 | 1857.8 | 1857.8  | 1859.7 |
| gdb 3238 | 1867.9 <sup>a</sup> | 1855.7 | 1855.7  | 1859.7 | 1852.8 | 1852.8  | 1854.9 |
| gdb 3239 | 1864.0 <sup>a</sup> | 1852.6 | 1852.6  | 1855.4 | 1846.2 | 1846.2  | 1847.6 |
| gdb 3240 | 1875.4 <sup>a</sup> | 1864.3 | 1864.3  | 1869.0 | 1863.9 | 1863.8  | 1866.4 |
| gdb 3241 | 1878.2 <sup>a</sup> | 1874.7 | 1874.7  | 1877.8 | 1868.2 | 1868.2  | 1870.8 |
| gdb 3242 | 1880.0 <sup>a</sup> | 1874.4 | 1874.4  | 1877.9 | 1867.6 | 1867.6  | 1870.5 |
| gdb 3243 | 1888.0 <sup>a</sup> | 1882.2 | 1882.2  | 1887.3 | 1879.0 | 1879.0  | 1882.4 |
| gdb 3244 | 1885.4 <sup>a</sup> | 1878.3 | 1878.3  | 1882.9 | 1874.9 | 1874.9  | 1878.9 |
| gdb 3245 | 1888.1 <sup>a</sup> | 1882.7 | 1882.7  | 1886.3 | 1879.4 | 1879.4  | 1880.7 |
| gdb 3246 | 1869.7 <sup>a</sup> | 1866.0 | 1866.0  | 1867.4 | 1865.0 | 1865.0  | 1866.1 |
| gdb 3247 | 1864.7 <sup>a</sup> | 1863.7 | 1863.7  | 1867.8 | 1863.2 | 1863.2  | 1866.3 |

... continued on next page ...

Table S73: ... continued from previous page ...

| Species  | Ref.                | OM2    | OM2-D3T | ODM2   | OM3    | OM3-D3T | ODM3   |
|----------|---------------------|--------|---------|--------|--------|---------|--------|
| gdb 3248 | 1864.2 <sup>a</sup> | 1857.8 | 1857.8  | 1863.1 | 1854.2 | 1854.2  | 1857.3 |
| gdb 3249 | 1866.7 <sup>a</sup> | 1860.0 | 1860.0  | 1860.0 | 1865.0 | 1856.6  | 1859.2 |
| gdb 3250 | 1862.8 <sup>a</sup> | 1858.1 | 1858.1  | 1863.0 | 1854.5 | 1854.5  | 1857.7 |
| gdb 3251 | 1868.7 <sup>a</sup> | 1867.9 | 1867.9  | 1873.8 | 1866.4 | 1866.4  | 1869.0 |
| gdb 3252 | 1859.3 <sup>a</sup> | 1857.0 | 1857.0  | 1862.4 | 1853.7 | 1853.7  | 1856.7 |
| gdb 3253 | 1860.2 <sup>a</sup> | 1857.9 | 1857.9  | 1862.7 | 1854.1 | 1854.1  | 1856.6 |
| gdb 3254 | 1864.4 <sup>a</sup> | 1867.1 | 1867.1  | 1873.3 | 1866.4 | 1866.3  | 1868.9 |
| gdb 3255 | 1894.3 <sup>a</sup> | 1896.8 | 1896.8  | 1899.7 | 1887.1 | 1887.1  | 1890.5 |
| gdb 3256 | 1892.6 <sup>a</sup> | 1896.0 | 1896.0  | 1899.5 | 1886.5 | 1886.5  | 1890.9 |
| gdb 3257 | 1898.7 <sup>a</sup> | 1898.3 | 1898.3  | 1901.8 | 1894.2 | 1894.2  | 1896.5 |
| gdb 3258 | 1894.0 <sup>a</sup> | 1892.0 | 1892.0  | 1896.0 | 1888.2 | 1888.2  | 1891.2 |
| gdb 3259 | 1894.6 <sup>a</sup> | 1898.5 | 1898.5  | 1901.9 | 1888.4 | 1888.4  | 1892.2 |
| gdb 3260 | 1893.7 <sup>a</sup> | 1890.5 | 1890.5  | 1894.0 | 1883.6 | 1883.6  | 1886.6 |
| gdb 3261 | 1898.9 <sup>a</sup> | 1899.3 | 1899.3  | 1904.1 | 1895.5 | 1895.4  | 1898.2 |
| gdb 3262 | 1894.4 <sup>a</sup> | 1894.6 | 1894.6  | 1899.7 | 1890.9 | 1890.9  | 1894.1 |
| gdb 3263 | 1898.3 <sup>a</sup> | 1892.8 | 1892.8  | 1896.9 | 1889.1 | 1889.1  | 1891.7 |
| gdb 3264 | 1870.6 <sup>a</sup> | 1860.1 | 1860.1  | 1865.0 | 1857.5 | 1857.4  | 1859.9 |
| gdb 3265 | 1870.0 <sup>a</sup> | 1858.4 | 1858.4  | 1861.7 | 1855.8 | 1855.8  | 1857.9 |
| gdb 3266 | 1866.7 <sup>a</sup> | 1857.7 | 1857.7  | 1862.0 | 1855.0 | 1855.0  | 1857.3 |
| gdb 3267 | 1874.8 <sup>a</sup> | 1864.4 | 1864.4  | 1869.3 | 1864.8 | 1864.8  | 1867.2 |
| gdb 3268 | 1868.1 <sup>a</sup> | 1856.7 | 1856.7  | 1859.8 | 1853.8 | 1853.8  | 1855.7 |
| gdb 3269 | 1865.7 <sup>a</sup> | 1857.3 | 1857.3  | 1861.4 | 1854.6 | 1854.6  | 1856.9 |
| gdb 3270 | 1868.4 <sup>a</sup> | 1857.4 | 1857.4  | 1861.2 | 1854.7 | 1854.7  | 1856.3 |
| gdb 3271 | 1866.2 <sup>a</sup> | 1858.3 | 1858.3  | 1862.9 | 1855.2 | 1855.2  | 1857.6 |
| gdb 3272 | 1873.2 <sup>a</sup> | 1862.6 | 1862.6  | 1868.7 | 1863.2 | 1863.2  | 1865.8 |
| gdb 3273 | 1886.7 <sup>a</sup> | 1891.3 | 1891.3  | 1892.1 | 1879.8 | 1879.8  | 1881.9 |
| gdb 3274 | 1886.7 <sup>a</sup> | 1887.7 | 1887.7  | 1890.2 | 1879.6 | 1879.6  | 1881.7 |
| gdb 3275 | 1889.5 <sup>a</sup> | 1886.9 | 1886.9  | 1889.8 | 1882.4 | 1882.4  | 1884.3 |
| gdb 3276 | 1889.8 <sup>a</sup> | 1888.2 | 1888.2  | 1891.1 | 1883.7 | 1883.6  | 1885.8 |
| gdb 3277 | 1862.9 <sup>a</sup> | 1862.0 | 1862.0  | 1864.4 | 1862.3 | 1862.3  | 1863.7 |
| gdb 3278 | 1876.9 <sup>a</sup> | 1870.8 | 1870.8  | 1868.9 | 1868.3 | 1868.3  | 1865.7 |
| gdb 3279 | 1862.9 <sup>a</sup> | 1862.6 | 1862.6  | 1865.3 | 1863.1 | 1863.1  | 1864.6 |
| gdb 3280 | 1870.0 <sup>a</sup> | 1872.0 | 1872.0  | 1873.0 | 1875.8 | 1875.8  | 1875.8 |
| gdb 3281 | 1873.6 <sup>a</sup> | 1870.1 | 1870.1  | 1868.9 | 1866.9 | 1866.9  | 1864.3 |
| gdb 3282 | 1862.6 <sup>a</sup> | 1862.0 | 1862.0  | 1864.4 | 1862.1 | 1862.1  | 1863.4 |
| gdb 3283 | 1877.6 <sup>a</sup> | 1869.3 | 1869.3  | 1868.3 | 1866.9 | 1866.9  | 1864.2 |
| gdb 3284 | 1862.4 <sup>a</sup> | 1863.0 | 1863.0  | 1865.6 | 1863.2 | 1863.2  | 1864.5 |
| gdb 3285 | 1871.6 <sup>a</sup> | 1870.9 | 1870.9  | 1874.1 | 1875.6 | 1875.6  | 1875.3 |
| gdb 3286 | 1855.2 <sup>a</sup> | 1854.8 | 1854.8  | 1856.3 | 1853.0 | 1853.0  | 1856.1 |
| gdb 3287 | 1864.4 <sup>a</sup> | 1863.6 | 1863.6  | 1865.2 | 1865.3 | 1865.3  | 1866.7 |
| gdb 3288 | 1872.4 <sup>a</sup> | 1867.2 | 1867.2  | 1864.9 | 1866.1 | 1866.1  | 1863.4 |
| gdb 3289 | 1871.8 <sup>a</sup> | 1872.9 | 1872.9  | 1877.6 | 1867.1 | 1867.1  | 1871.5 |
| gdb 3290 | 1874.6 <sup>a</sup> | 1883.5 | 1883.5  | 1888.0 | 1880.0 | 1880.0  | 1883.2 |
| gdb 3291 | 1874.5 <sup>a</sup> | 1883.7 | 1883.7  | 1888.2 | 1880.3 | 1880.3  | 1883.7 |
| gdb 3292 | 1876.4 <sup>a</sup> | 1878.0 | 1878.0  | 1883.0 | 1875.6 | 1875.6  | 1878.3 |
| gdb 3293 | 1878.0 <sup>a</sup> | 1873.6 | 1873.6  | 1878.0 | 1867.4 | 1867.4  | 1871.3 |
| gdb 3294 | 1883.6 <sup>a</sup> | 1881.0 | 1881.0  | 1884.3 | 1872.4 | 1872.4  | 1876.9 |
| gdb 3295 | 1886.4 <sup>a</sup> | 1880.4 | 1880.4  | 1885.0 | 1877.5 | 1877.5  | 1881.4 |
| gdb 3296 | 1885.6 <sup>a</sup> | 1881.6 | 1881.6  | 1885.8 | 1878.8 | 1878.8  | 1882.4 |
| gdb 3297 | 1890.6 <sup>a</sup> | 1883.1 | 1883.1  | 1887.8 | 1880.5 | 1880.5  | 1883.0 |
| gdb 3298 | 1866.3 <sup>a</sup> | 1863.7 | 1863.7  | 1867.4 | 1859.6 | 1859.6  | 1863.3 |
| gdb 3299 | 1870.5 <sup>a</sup> | 1869.7 | 1869.7  | 1871.6 | 1869.5 | 1869.4  | 1871.5 |
| gdb 3300 | 1871.2 <sup>a</sup> | 1870.2 | 1870.2  | 1871.9 | 1870.1 | 1870.1  | 1872.2 |
| gdb 3301 | 1869.2 <sup>a</sup> | 1872.9 | 1872.8  | 1877.0 | 1872.4 | 1872.4  | 1874.9 |
| gdb 3302 | 1888.0 <sup>a</sup> | 1883.9 | 1883.9  | 1886.5 | 1886.8 | 1886.8  | 1887.4 |
| gdb 3303 | 1885.9 <sup>a</sup> | 1885.0 | 1884.9  | 1887.7 | 1887.5 | 1887.4  | 1888.0 |
| gdb 3304 | 1890.7 <sup>a</sup> | 1890.4 | 1890.4  | 1894.8 | 1889.2 | 1889.2  | 1891.6 |
| gdb 3305 | 1888.1 <sup>a</sup> | 1884.2 | 1884.1  | 1886.5 | 1887.7 | 1887.7  | 1888.3 |
| gdb 3306 | 1903.2 <sup>a</sup> | 1905.1 | 1905.1  | 1906.1 | 1908.2 | 1908.2  | 1908.2 |
| gdb 3307 | 1903.6 <sup>a</sup> | 1903.8 | 1903.7  | 1905.0 | 1907.8 | 1907.8  | 1907.4 |
| gdb 3308 | 1913.2 <sup>a</sup> | 1907.4 | 1907.4  | 1907.9 | 1905.3 | 1905.3  | 1907.2 |
| gdb 3309 | 1891.6 <sup>a</sup> | 1894.9 | 1894.9  | 1896.6 | 1894.6 | 1894.6  | 1896.5 |
| gdb 3310 | 1890.7 <sup>a</sup> | 1894.9 | 1894.9  | 1895.9 | 1895.3 | 1895.2  | 1897.0 |
| gdb 3311 | 1905.5 <sup>a</sup> | 1901.2 | 1901.2  | 1901.8 | 1900.1 | 1900.0  | 1902.3 |
| gdb 3312 | 1908.0 <sup>a</sup> | 1905.1 | 1905.1  | 1905.6 | 1903.2 | 1903.1  | 1905.5 |

... continued on next page ...

Table S73: ... continued from previous page ...

| Species  | Ref.                | OM2    | OM2-D3T | ODM2   | OM3    | OM3-D3T | ODM3   |
|----------|---------------------|--------|---------|--------|--------|---------|--------|
| gdb 3313 | 1898.1 <sup>a</sup> | 1901.9 | 1901.9  | 1902.2 | 1906.0 | 1906.0  | 1905.7 |
| gdb 3314 | 1877.2 <sup>a</sup> | 1877.3 | 1877.3  | 1877.3 | 1879.4 | 1876.9  | 1879.1 |
| gdb 3315 | 1910.3 <sup>a</sup> | 1915.8 | 1915.8  | 1918.3 | 1913.1 | 1913.1  | 1915.9 |
| gdb 3316 | 1911.8 <sup>a</sup> | 1919.7 | 1919.7  | 1921.3 | 1916.5 | 1916.5  | 1917.5 |
| gdb 3317 | 1907.5 <sup>a</sup> | 1913.0 | 1913.0  | 1915.1 | 1910.3 | 1910.2  | 1912.6 |
| gdb 3318 | 1916.1 <sup>a</sup> | 1920.9 | 1920.9  | 1922.4 | 1921.2 | 1921.2  | 1922.1 |
| gdb 3319 | 1888.1 <sup>a</sup> | 1893.9 | 1893.9  | 1895.7 | 1893.1 | 1893.1  | 1895.1 |
| gdb 3320 | 1884.1 <sup>a</sup> | 1888.2 | 1888.2  | 1890.1 | 1888.2 | 1888.2  | 1890.6 |
| gdb 3321 | 1892.1 <sup>a</sup> | 1895.0 | 1894.9  | 1896.2 | 1898.8 | 1898.4  | 1899.5 |
| gdb 3322 | 1896.3 <sup>a</sup> | 1891.5 | 1891.5  | 1895.1 | 1892.9 | 1892.9  | 1894.9 |
| gdb 3323 | 1896.8 <sup>a</sup> | 1890.0 | 1890.0  | 1892.6 | 1891.8 | 1891.8  | 1893.1 |
| gdb 3324 | 1886.8 <sup>a</sup> | 1884.0 | 1884.0  | 1885.8 | 1882.5 | 1882.5  | 1884.3 |
| gdb 3325 | 1884.5 <sup>a</sup> | 1881.3 | 1881.3  | 1883.7 | 1879.8 | 1879.7  | 1881.9 |
| gdb 3326 | 1892.3 <sup>a</sup> | 1896.1 | 1896.1  | 1900.2 | 1891.3 | 1891.3  | 1894.5 |
| gdb 3327 | 1894.7 <sup>a</sup> | 1898.4 | 1898.4  | 1902.0 | 1893.7 | 1893.7  | 1896.6 |
| gdb 3328 | 1889.9 <sup>a</sup> | 1893.6 | 1893.6  | 1897.2 | 1889.3 | 1889.3  | 1892.4 |
| gdb 3329 | 1902.4 <sup>a</sup> | 1903.4 | 1903.4  | 1907.8 | 1902.3 | 1902.3  | 1904.3 |
| gdb 3330 | 1831.8 <sup>a</sup> | 1820.3 | 1820.3  | 1824.5 | 1815.8 | 1815.8  | 1819.4 |
| gdb 3331 | 1835.5 <sup>a</sup> | 1823.2 | 1823.2  | 1826.5 | 1818.2 | 1818.2  | 1821.3 |
| gdb 3332 | 1832.8 <sup>a</sup> | 1820.6 | 1820.6  | 1824.2 | 1816.0 | 1816.0  | 1819.2 |
| gdb 3333 | 1851.3 <sup>a</sup> | 1837.3 | 1837.3  | 1842.5 | 1835.3 | 1835.3  | 1838.4 |
| gdb 3334 | 1851.1 <sup>a</sup> | 1834.8 | 1834.8  | 1839.1 | 1833.5 | 1833.5  | 1836.5 |
| gdb 3335 | 1842.8 <sup>a</sup> | 1837.2 | 1837.2  | 1842.1 | 1835.0 | 1835.0  | 1838.2 |
| gdb 3336 | 1844.6 <sup>a</sup> | 1839.3 | 1839.3  | 1843.3 | 1836.9 | 1836.8  | 1839.4 |
| gdb 3337 | 1882.5 <sup>a</sup> | 1881.3 | 1881.3  | 1884.7 | 1882.3 | 1882.3  | 1882.7 |
| gdb 3338 | 1872.6 <sup>a</sup> | 1866.0 | 1866.0  | 1868.0 | 1866.2 | 1866.2  | 1867.2 |
| gdb 3339 | 1870.6 <sup>a</sup> | 1865.0 | 1865.0  | 1866.9 | 1864.8 | 1864.7  | 1866.1 |
| gdb 3340 | 1841.4 <sup>a</sup> | 1826.4 | 1826.4  | 1825.8 | 1821.4 | 1820.9  | 1819.9 |
| gdb 3341 | 1841.4 <sup>a</sup> | 1824.1 | 1824.1  | 1822.5 | 1818.9 | 1818.9  | 1817.0 |
| gdb 3342 | 1849.5 <sup>a</sup> | 1840.8 | 1840.8  | 1841.4 | 1837.1 | 1837.1  | 1834.9 |
| gdb 3343 | 1845.4 <sup>a</sup> | 1832.1 | 1832.1  | 1834.6 | 1832.5 | 1832.5  | 1833.0 |
| gdb 3344 | 1845.7 <sup>a</sup> | 1830.9 | 1830.9  | 1833.7 | 1831.4 | 1831.3  | 1832.3 |
| gdb 3345 | 1883.8 <sup>a</sup> | 1871.4 | 1871.4  | 1873.8 | 1870.9 | 1870.8  | 1874.7 |
| gdb 3346 | 1864.9 <sup>a</sup> | 1855.7 | 1855.6  | 1857.7 | 1857.4 | 1857.3  | 1859.9 |
| gdb 3347 | 1863.0 <sup>a</sup> | 1852.5 | 1852.5  | 1853.7 | 1854.1 | 1854.0  | 1856.2 |
| gdb 3348 | 1872.9 <sup>a</sup> | 1870.5 | 1870.5  | 1872.9 | 1873.6 | 1873.6  | 1874.9 |
| gdb 3349 | 1909.7 <sup>a</sup> | 1915.3 | 1915.3  | 1917.7 | 1913.0 | 1913.0  | 1915.9 |
| gdb 3350 | 1928.6 <sup>a</sup> | 1924.8 | 1924.8  | 1926.3 | 1921.4 | 1921.4  | 1924.2 |
| gdb 3351 | 1908.1 <sup>a</sup> | 1912.4 | 1912.4  | 1914.5 | 1909.9 | 1909.9  | 1912.4 |
| gdb 3352 | 1916.9 <sup>a</sup> | 1921.6 | 1921.6  | 1924.8 | 1922.3 | 1922.3  | 1924.2 |
| gdb 3353 | 1892.4 <sup>a</sup> | 1897.0 | 1897.0  | 1900.7 | 1893.1 | 1893.1  | 1895.7 |
| gdb 3354 | 1892.6 <sup>a</sup> | 1897.0 | 1896.9  | 1900.7 | 1893.1 | 1893.1  | 1895.8 |
| gdb 3355 | 1876.8 <sup>a</sup> | 1874.0 | 1874.0  | 1873.8 | 1865.2 | 1865.2  | 1864.7 |
| gdb 3356 | 1889.6 <sup>a</sup> | 1882.8 | 1882.8  | 1882.4 | 1877.2 | 1877.2  | 1875.9 |
| gdb 3357 | 1884.9 <sup>a</sup> | 1882.6 | 1882.6  | 1886.2 | 1879.3 | 1879.3  | 1881.4 |
| gdb 3358 | 1856.4 <sup>a</sup> | 1848.0 | 1848.0  | 1847.9 | 1840.7 | 1840.7  | 1839.5 |
| gdb 3359 | 1869.9 <sup>a</sup> | 1857.3 | 1857.3  | 1858.6 | 1853.0 | 1853.0  | 1851.9 |
| gdb 3360 | 1864.3 <sup>a</sup> | 1857.4 | 1857.4  | 1861.6 | 1855.6 | 1855.5  | 1857.5 |
| gdb 3361 | 1880.6 <sup>a</sup> | 1877.0 | 1877.0  | 1879.6 | 1875.8 | 1875.8  | 1878.8 |
| gdb 3362 | 1891.4 <sup>a</sup> | 1886.1 | 1886.1  | 1889.1 | 1887.2 | 1887.2  | 1889.8 |
| gdb 3363 | 1901.7 <sup>a</sup> | 1903.8 | 1903.8  | 1907.9 | 1900.1 | 1900.1  | 1903.2 |
| gdb 3364 | 1899.8 <sup>a</sup> | 1902.4 | 1902.4  | 1906.4 | 1898.6 | 1898.6  | 1901.6 |
| gdb 3365 | 1882.5 <sup>a</sup> | 1890.4 | 1890.4  | 1892.7 | 1890.7 | 1890.7  | 1891.5 |
| gdb 3366 | 1885.5 <sup>a</sup> | 1891.8 | 1891.8  | 1894.7 | 1892.2 | 1892.2  | 1893.0 |
| gdb 3367 | 1879.2 <sup>a</sup> | 1879.9 | 1879.9  | 1882.2 | 1878.2 | 1878.2  | 1880.0 |
| gdb 3368 | 1879.2 <sup>a</sup> | 1880.1 | 1880.1  | 1882.6 | 1878.5 | 1878.4  | 1880.8 |
| gdb 3369 | 1847.0 <sup>a</sup> | 1837.7 | 1837.7  | 1841.7 | 1832.4 | 1832.3  | 1836.0 |
| gdb 3370 | 1845.7 <sup>a</sup> | 1837.2 | 1837.2  | 1840.5 | 1832.1 | 1832.1  | 1835.8 |
| gdb 3371 | 1851.5 <sup>a</sup> | 1850.7 | 1850.7  | 1855.7 | 1847.7 | 1847.7  | 1850.7 |
| gdb 3372 | 1854.5 <sup>a</sup> | 1852.1 | 1852.1  | 1857.7 | 1849.3 | 1849.3  | 1852.7 |
| gdb 3373 | 1848.0 <sup>a</sup> | 1843.1 | 1843.1  | 1843.0 | 1835.2 | 1835.2  | 1834.4 |
| gdb 3374 | 1850.0 <sup>a</sup> | 1845.2 | 1845.2  | 1845.4 | 1837.5 | 1837.5  | 1836.8 |
| gdb 3375 | 1854.3 <sup>a</sup> | 1857.9 | 1857.9  | 1859.1 | 1852.4 | 1852.4  | 1850.4 |
| gdb 3376 | 1852.8 <sup>a</sup> | 1853.1 | 1853.1  | 1857.4 | 1850.7 | 1850.7  | 1852.9 |
| gdb 3377 | 1852.3 <sup>a</sup> | 1852.5 | 1852.5  | 1856.9 | 1850.0 | 1850.0  | 1852.0 |

... continued on next page ...



Table S73: ... continued from previous page ...

| Species  | Ref.                | OM2    | OM2-D3T | ODM2   | OM3    | OM3-D3T | ODM3   |
|----------|---------------------|--------|---------|--------|--------|---------|--------|
| gdb 3378 | 1870.5 <sup>a</sup> | 1872.0 | 1872.0  | 1875.0 | 1870.6 | 1870.5  | 1874.0 |
| gdb 3379 | 1871.0 <sup>a</sup> | 1871.4 | 1871.4  | 1871.4 | 1874.3 | 1870.2  | 1873.6 |
| gdb 3380 | 1873.4 <sup>a</sup> | 1883.1 | 1883.1  | 1887.5 | 1884.2 | 1884.2  | 1886.9 |
| gdb 3381 | 1887.2 <sup>a</sup> | 1885.8 | 1885.8  | 1889.1 | 1882.8 | 1882.8  | 1884.8 |
| gdb 3382 | 1885.1 <sup>a</sup> | 1883.5 | 1883.5  | 1885.8 | 1881.0 | 1880.9  | 1883.3 |
| gdb 3383 | 1913.5 <sup>a</sup> | 1918.3 | 1918.3  | 1918.3 | 1920.2 | 1915.2  | 1918.0 |
| gdb 3384 | 1897.6 <sup>a</sup> | 1904.0 | 1904.0  | 1904.0 | 1905.7 | 1903.0  | 1905.1 |
| gdb 3385 | 1897.6 <sup>a</sup> | 1904.2 | 1904.2  | 1905.9 | 1903.0 | 1903.0  | 1904.9 |
| gdb 3386 | 1900.5 <sup>a</sup> | 1913.3 | 1913.3  | 1914.9 | 1914.5 | 1914.5  | 1914.7 |
| gdb 3387 | 1863.4 <sup>a</sup> | 1861.6 | 1861.6  | 1860.8 | 1855.4 | 1855.4  | 1853.9 |
| gdb 3388 | 1872.9 <sup>a</sup> | 1869.9 | 1869.9  | 1868.5 | 1867.5 | 1867.5  | 1864.3 |
| gdb 3389 | 1866.4 <sup>a</sup> | 1866.7 | 1864.5  | 1868.1 | 1867.7 | 1867.7  | 1868.8 |
| gdb 3390 | 1863.4 <sup>a</sup> | 1865.9 | 1865.8  | 1868.3 | 1865.7 | 1865.7  | 1866.8 |
| gdb 3391 | 1877.3 <sup>a</sup> | 1871.6 | 1871.6  | 1875.2 | 1869.6 | 1869.6  | 1871.5 |
| gdb 3392 | 1873.0 <sup>a</sup> | 1863.8 | 1863.8  | 1866.6 | 1862.3 | 1862.3  | 1864.7 |
| gdb 3393 | 1871.1 <sup>a</sup> | 1863.6 | 1863.6  | 1867.2 | 1863.7 | 1863.7  | 1866.1 |
| gdb 3394 | 1872.6 <sup>a</sup> | 1868.0 | 1868.0  | 1871.6 | 1867.4 | 1867.4  | 1869.6 |
| gdb 3395 | 1879.9 <sup>a</sup> | 1873.7 | 1873.7  | 1877.7 | 1876.3 | 1876.3  | 1877.0 |
| gdb 3396 | 1864.1 <sup>a</sup> | 1861.2 | 1861.2  | 1865.6 | 1855.0 | 1855.0  | 1859.0 |
| gdb 3397 | 1873.8 <sup>a</sup> | 1870.5 | 1870.5  | 1875.3 | 1867.7 | 1867.7  | 1870.5 |
| gdb 3398 | 1873.9 <sup>a</sup> | 1873.3 | 1873.3  | 1879.0 | 1869.9 | 1869.9  | 1873.7 |
| gdb 3399 | 1869.2 <sup>a</sup> | 1870.8 | 1870.8  | 1875.6 | 1867.5 | 1867.5  | 1871.1 |
| gdb 3400 | 1866.4 <sup>a</sup> | 1862.8 | 1862.8  | 1861.6 | 1857.2 | 1857.1  | 1856.2 |
| gdb 3401 | 1876.6 <sup>a</sup> | 1868.6 | 1868.6  | 1867.1 | 1866.9 | 1866.9  | 1864.0 |
| gdb 3402 | 1866.8 <sup>a</sup> | 1863.4 | 1863.4  | 1866.2 | 1864.1 | 1864.0  | 1865.9 |
| gdb 3403 | 1866.3 <sup>a</sup> | 1862.8 | 1862.7  | 1865.5 | 1863.3 | 1863.3  | 1865.1 |
| gdb 3404 | 1877.3 <sup>a</sup> | 1877.1 | 1877.1  | 1879.2 | 1876.9 | 1876.9  | 1879.1 |
| gdb 3405 | 1876.0 <sup>a</sup> | 1874.4 | 1874.4  | 1876.7 | 1873.7 | 1873.7  | 1876.4 |
| gdb 3406 | 1876.1 <sup>a</sup> | 1874.1 | 1874.1  | 1876.5 | 1873.7 | 1873.6  | 1876.2 |
| gdb 3407 | 1885.6 <sup>a</sup> | 1881.8 | 1881.8  | 1884.5 | 1885.1 | 1885.1  | 1885.9 |
| gdb 3408 | 1871.9 <sup>a</sup> | 1869.0 | 1869.0  | 1871.5 | 1869.7 | 1869.7  | 1872.3 |
| gdb 3409 | 1909.4 <sup>a</sup> | 1904.8 | 1904.8  | 1905.1 | 1902.8 | 1902.8  | 1904.8 |
| gdb 3410 | 1894.3 <sup>a</sup> | 1898.4 | 1898.4  | 1899.9 | 1897.4 | 1897.4  | 1899.0 |
| gdb 3411 | 1893.0 <sup>a</sup> | 1897.2 | 1897.2  | 1898.6 | 1896.8 | 1896.8  | 1898.7 |
| gdb 3412 | 1900.6 <sup>a</sup> | 1903.6 | 1903.6  | 1904.6 | 1907.1 | 1907.1  | 1906.9 |
| gdb 3413 | 1887.8 <sup>a</sup> | 1892.5 | 1892.5  | 1893.9 | 1892.0 | 1892.0  | 1893.5 |
| gdb 3414 | 1890.2 <sup>a</sup> | 1892.2 | 1892.2  | 1893.5 | 1891.2 | 1891.2  | 1893.2 |
| gdb 3415 | 1887.5 <sup>a</sup> | 1890.3 | 1890.3  | 1891.6 | 1889.6 | 1889.6  | 1891.5 |
| gdb 3416 | 1895.9 <sup>a</sup> | 1896.9 | 1896.9  | 1897.7 | 1900.1 | 1900.1  | 1900.3 |
| gdb 3417 | 1886.7 <sup>a</sup> | 1892.2 | 1892.2  | 1895.3 | 1890.7 | 1890.7  | 1893.6 |
| gdb 3418 | 1891.2 <sup>a</sup> | 1894.0 | 1894.0  | 1897.3 | 1892.6 | 1892.6  | 1896.3 |
| gdb 3419 | 1898.6 <sup>a</sup> | 1900.9 | 1900.9  | 1903.2 | 1903.1 | 1903.1  | 1904.5 |
| gdb 3420 | 1889.9 <sup>a</sup> | 1893.5 | 1893.4  | 1896.9 | 1883.6 | 1883.6  | 1889.7 |
| gdb 3421 | 1897.5 <sup>a</sup> | 1897.9 | 1897.9  | 1902.3 | 1894.1 | 1894.1  | 1897.6 |
| gdb 3422 | 1895.6 <sup>a</sup> | 1897.1 | 1897.1  | 1901.6 | 1893.8 | 1893.8  | 1898.2 |
| gdb 3423 | 1894.0 <sup>a</sup> | 1903.2 | 1903.2  | 1905.7 | 1901.9 | 1901.8  | 1903.8 |
| gdb 3424 | 1896.4 <sup>a</sup> | 1903.4 | 1903.4  | 1905.8 | 1902.4 | 1902.4  | 1904.9 |
| gdb 3425 | 1896.9 <sup>a</sup> | 1905.9 | 1905.9  | 1908.7 | 1904.7 | 1904.7  | 1907.0 |
| gdb 3426 | 1901.0 <sup>a</sup> | 1909.1 | 1909.1  | 1910.8 | 1910.7 | 1910.7  | 1911.0 |
| gdb 3427 | 1871.0 <sup>a</sup> | 1868.5 | 1868.5  | 1870.9 | 1868.9 | 1868.9  | 1871.5 |
| gdb 3428 | 1872.3 <sup>a</sup> | 1869.2 | 1869.2  | 1872.0 | 1869.5 | 1869.5  | 1872.7 |
| gdb 3429 | 1915.3 <sup>a</sup> | 1918.8 | 1918.8  | 1919.8 | 1919.7 | 1919.7  | 1920.0 |
| gdb 3430 | 1915.5 <sup>a</sup> | 1918.7 | 1918.6  | 1919.6 | 1919.5 | 1919.5  | 1919.5 |
| gdb 3431 | 1910.9 <sup>a</sup> | 1917.0 | 1917.0  | 1917.8 | 1917.8 | 1917.8  | 1917.9 |
| gdb 3432 | 1911.2 <sup>a</sup> | 1917.2 | 1917.2  | 1918.0 | 1918.1 | 1918.1  | 1918.2 |
| gdb 3433 | 1889.9 <sup>a</sup> | 1888.6 | 1888.6  | 1891.9 | 1890.4 | 1890.4  | 1890.9 |
| gdb 3434 | 1887.8 <sup>a</sup> | 1885.4 | 1885.4  | 1884.8 | 1880.1 | 1880.1  | 1877.5 |
| gdb 3435 | 1888.1 <sup>a</sup> | 1885.9 | 1885.9  | 1885.2 | 1880.7 | 1880.7  | 1877.9 |
| gdb 3436 | 1890.7 <sup>a</sup> | 1888.6 | 1888.6  | 1891.6 | 1890.5 | 1890.5  | 1890.5 |
| gdb 3437 | 1884.7 <sup>a</sup> | 1884.0 | 1884.0  | 1887.2 | 1880.0 | 1880.0  | 1881.7 |
| gdb 3438 | 1886.0 <sup>a</sup> | 1884.8 | 1884.8  | 1888.3 | 1882.4 | 1882.4  | 1885.0 |
| gdb 3439 | 1886.8 <sup>a</sup> | 1884.9 | 1884.9  | 1888.3 | 1882.1 | 1882.1  | 1884.3 |
| gdb 3440 | 1886.4 <sup>a</sup> | 1886.5 | 1886.5  | 1886.0 | 1881.7 | 1881.7  | 1879.1 |
| gdb 3441 | 1905.0 <sup>a</sup> | 1911.0 | 1911.0  | 1912.1 | 1912.6 | 1912.6  | 1913.8 |
| gdb 3442 | 1887.2 <sup>a</sup> | 1885.5 | 1885.5  | 1884.1 | 1881.3 | 1881.3  | 1878.8 |

... continued on next page ...

Table S73: ... continued from previous page ...

| Species  | Ref.                | OM2    | OM2-D3T | ODM2   | OM3    | OM3-D3T | ODM3   |
|----------|---------------------|--------|---------|--------|--------|---------|--------|
| gdb 3443 | 1912.2 <sup>a</sup> | 1918.9 | 1918.9  | 1920.0 | 1920.1 | 1920.1  | 1920.3 |
| gdb 3444 | 1916.3 <sup>a</sup> | 1918.3 | 1918.3  | 1918.3 | 1914.9 | 1914.9  | 1917.7 |
| gdb 3445 | 1865.1 <sup>a</sup> | 1862.9 | 1862.8  | 1865.1 | 1859.9 | 1859.9  | 1862.1 |
| gdb 3446 | 1862.5 <sup>a</sup> | 1859.9 | 1859.9  | 1861.9 | 1857.2 | 1857.2  | 1859.1 |
| gdb 3447 | 1877.4 <sup>a</sup> | 1881.1 | 1881.1  | 1884.8 | 1881.1 | 1881.1  | 1881.8 |
| gdb 3448 | 1912.3 <sup>a</sup> | 1917.1 | 1917.1  | 1918.7 | 1916.1 | 1916.1  | 1917.4 |
| gdb 3449 | 1915.2 <sup>a</sup> | 1919.6 | 1919.6  | 1921.2 | 1918.9 | 1918.9  | 1919.4 |
| gdb 3450 | 1909.0 <sup>a</sup> | 1916.0 | 1916.0  | 1917.2 | 1915.5 | 1915.4  | 1916.2 |
| gdb 3451 | 1911.2 <sup>a</sup> | 1918.9 | 1918.9  | 1920.3 | 1918.5 | 1918.5  | 1918.9 |
| gdb 3452 | 1883.9 <sup>a</sup> | 1883.4 | 1883.4  | 1883.4 | 1878.0 | 1878.0  | 1875.9 |
| gdb 3453 | 1885.5 <sup>a</sup> | 1891.8 | 1891.8  | 1895.9 | 1891.5 | 1891.5  | 1892.1 |
| gdb 3454 | 1902.7 <sup>a</sup> | 1908.4 | 1908.4  | 1910.0 | 1909.6 | 1909.5  | 1911.5 |
| gdb 3455 | 1885.8 <sup>a</sup> | 1883.4 | 1883.4  | 1883.5 | 1878.6 | 1878.5  | 1876.7 |
| gdb 3456 | 1888.3 <sup>a</sup> | 1890.4 | 1890.4  | 1892.9 | 1889.7 | 1889.7  | 1889.8 |
| gdb 3457 | 1902.1 <sup>a</sup> | 1909.2 | 1909.2  | 1912.0 | 1910.5 | 1910.5  | 1912.7 |
| gdb 3458 | 1903.2 <sup>a</sup> | 1910.0 | 1910.0  | 1911.7 | 1911.0 | 1911.0  | 1912.6 |
| gdb 3459 | 1887.1 <sup>a</sup> | 1885.1 | 1885.1  | 1887.2 | 1886.5 | 1886.5  | 1887.2 |
| gdb 3460 | 1888.3 <sup>a</sup> | 1885.5 | 1885.5  | 1888.9 | 1886.7 | 1886.7  | 1887.9 |
| gdb 3461 | 1889.6 <sup>a</sup> | 1885.2 | 1885.2  | 1884.9 | 1879.7 | 1879.7  | 1877.5 |
| gdb 3462 | 1885.9 <sup>a</sup> | 1882.7 | 1882.7  | 1885.6 | 1885.3 | 1885.3  | 1886.3 |
| gdb 3463 | 1885.4 <sup>a</sup> | 1884.0 | 1884.0  | 1887.3 | 1879.1 | 1879.1  | 1881.0 |
| gdb 3464 | 1891.2 <sup>a</sup> | 1892.3 | 1892.3  | 1897.1 | 1890.8 | 1890.7  | 1893.2 |
| gdb 3465 | 1885.5 <sup>a</sup> | 1884.2 | 1884.2  | 1886.9 | 1880.8 | 1880.8  | 1883.3 |
| gdb 3466 | 1887.6 <sup>a</sup> | 1886.2 | 1886.2  | 1890.1 | 1883.0 | 1883.0  | 1885.9 |
| gdb 3467 | 1886.8 <sup>a</sup> | 1886.2 | 1886.2  | 1889.4 | 1882.5 | 1882.5  | 1885.0 |
| gdb 3468 | 1890.6 <sup>a</sup> | 1895.5 | 1895.5  | 1901.9 | 1894.5 | 1894.5  | 1898.4 |
| gdb 3469 | 1883.1 <sup>a</sup> | 1882.4 | 1882.4  | 1882.6 | 1877.3 | 1877.3  | 1875.5 |
| gdb 3470 | 1884.7 <sup>a</sup> | 1883.4 | 1883.4  | 1883.1 | 1877.8 | 1877.8  | 1875.5 |
| gdb 3471 | 1886.3 <sup>a</sup> | 1889.7 | 1889.7  | 1892.7 | 1889.8 | 1889.8  | 1890.2 |
| gdb 3472 | 1888.0 <sup>a</sup> | 1886.1 | 1886.1  | 1889.4 | 1887.3 | 1887.3  | 1888.5 |
| gdb 3473 | 1885.8 <sup>a</sup> | 1884.1 | 1884.1  | 1887.5 | 1879.1 | 1879.1  | 1881.1 |
| gdb 3474 | 1893.7 <sup>a</sup> | 1892.8 | 1892.8  | 1896.3 | 1891.3 | 1891.2  | 1893.0 |
| gdb 3475 | 1888.1 <sup>a</sup> | 1885.0 | 1885.0  | 1885.0 | 1879.3 | 1879.3  | 1877.4 |
| gdb 3476 | 1884.1 <sup>a</sup> | 1882.2 | 1882.2  | 1881.9 | 1876.8 | 1876.8  | 1874.4 |
| gdb 3477 | 1888.6 <sup>a</sup> | 1890.1 | 1890.1  | 1893.8 | 1890.2 | 1890.2  | 1890.5 |
| gdb 3478 | 1884.3 <sup>a</sup> | 1883.4 | 1883.4  | 1887.2 | 1879.8 | 1879.8  | 1882.8 |
| gdb 3479 | 1889.2 <sup>a</sup> | 1887.5 | 1887.5  | 1891.2 | 1883.9 | 1883.9  | 1886.3 |
| gdb 3480 | 1884.5 <sup>a</sup> | 1884.5 | 1884.5  | 1887.7 | 1881.1 | 1881.1  | 1883.7 |
| gdb 3481 | 1890.1 <sup>a</sup> | 1897.4 | 1897.4  | 1901.7 | 1896.4 | 1896.4  | 1897.9 |
| gdb 3482 | 1899.1 <sup>a</sup> | 1905.7 | 1905.7  | 1908.3 | 1896.0 | 1896.0  | 1900.0 |
| gdb 3483 | 1897.8 <sup>a</sup> | 1904.7 | 1904.7  | 1907.1 | 1894.8 | 1894.8  | 1898.8 |
| gdb 3484 | 1899.8 <sup>a</sup> | 1903.5 | 1903.5  | 1907.4 | 1899.9 | 1899.9  | 1903.0 |
| gdb 3485 | 1903.7 <sup>a</sup> | 1907.4 | 1907.4  | 1911.0 | 1903.7 | 1903.7  | 1905.7 |
| gdb 3486 | 1903.0 <sup>a</sup> | 1905.3 | 1905.3  | 1909.1 | 1901.9 | 1901.9  | 1904.6 |
| gdb 3487 | 1897.5 <sup>a</sup> | 1905.0 | 1905.0  | 1907.5 | 1895.9 | 1895.9  | 1900.5 |
| gdb 3488 | 1900.3 <sup>a</sup> | 1906.9 | 1906.9  | 1910.8 | 1904.2 | 1904.2  | 1906.8 |
| gdb 3489 | 1898.9 <sup>a</sup> | 1904.8 | 1904.8  | 1908.5 | 1902.5 | 1902.5  | 1905.3 |
| gdb 3490 | 1900.0 <sup>a</sup> | 1906.5 | 1906.5  | 1910.3 | 1904.0 | 1904.0  | 1906.6 |
| gdb 3491 | 1909.9 <sup>a</sup> | 1915.8 | 1915.8  | 1918.0 | 1916.4 | 1916.4  | 1917.3 |
| gdb 3492 | 1908.9 <sup>a</sup> | 1913.6 | 1913.6  | 1914.6 | 1913.9 | 1913.9  | 1914.3 |
| gdb 3493 | 1903.2 <sup>a</sup> | 1909.4 | 1909.4  | 1911.1 | 1909.2 | 1909.2  | 1911.0 |
| gdb 3494 | 1903.9 <sup>a</sup> | 1912.7 | 1912.7  | 1914.5 | 1912.2 | 1912.2  | 1913.5 |
| gdb 3495 | 1885.7 <sup>a</sup> | 1885.6 | 1885.6  | 1889.4 | 1882.8 | 1882.7  | 1885.1 |
| gdb 3496 | 1878.6 <sup>a</sup> | 1879.2 | 1879.2  | 1881.7 | 1876.4 | 1876.4  | 1879.2 |
| gdb 3497 | 1908.5 <sup>a</sup> | 1916.1 | 1916.0  | 1918.6 | 1916.9 | 1916.9  | 1917.8 |
| gdb 3498 | 1879.5 <sup>a</sup> | 1879.0 | 1879.0  | 1877.9 | 1874.6 | 1874.6  | 1872.5 |
| gdb 3499 | 1913.8 <sup>a</sup> | 1911.9 | 1911.8  | 1913.0 | 1909.1 | 1909.1  | 1912.8 |
| gdb 3500 | 1900.9 <sup>a</sup> | 1906.7 | 1906.7  | 1909.6 | 1909.2 | 1909.1  | 1911.4 |
| gdb 3501 | 1891.8 <sup>a</sup> | 1886.2 | 1886.2  | 1886.0 | 1882.1 | 1882.1  | 1880.0 |
| gdb 3502 | 1888.1 <sup>a</sup> | 1888.2 | 1888.2  | 1891.2 | 1890.3 | 1890.3  | 1890.8 |
| gdb 3503 | 1889.7 <sup>a</sup> | 1884.7 | 1884.7  | 1884.3 | 1880.1 | 1880.1  | 1877.7 |
| gdb 3504 | 1890.6 <sup>a</sup> | 1888.0 | 1887.9  | 1890.9 | 1889.9 | 1889.9  | 1890.1 |
| gdb 3505 | 1886.7 <sup>a</sup> | 1879.9 | 1879.9  | 1883.5 | 1878.3 | 1878.3  | 1880.4 |
| gdb 3506 | 1882.4 <sup>a</sup> | 1882.4 | 1882.4  | 1885.2 | 1880.2 | 1880.2  | 1882.8 |
| gdb 3507 | 1884.3 <sup>a</sup> | 1881.1 | 1881.1  | 1883.7 | 1879.0 | 1879.0  | 1881.8 |

... continued on next page ...

Table S73: ... continued from previous page ...

| Species  | Ref.                | OM2    | OM2-D3T | ODM2   | OM3    | OM3-D3T | ODM3   |
|----------|---------------------|--------|---------|--------|--------|---------|--------|
| gdb 3508 | 1891.6 <sup>a</sup> | 1893.1 | 1893.1  | 1896.8 | 1893.5 | 1893.5  | 1895.0 |
| gdb 3509 | 1885.2 <sup>a</sup> | 1882.4 | 1882.4  | 1882.4 | 1881.0 | 1877.5  | 1874.9 |
| gdb 3510 | 1880.5 <sup>a</sup> | 1880.2 | 1880.2  | 1883.1 | 1878.6 | 1878.6  | 1880.4 |
| gdb 3511 | 1895.2 <sup>a</sup> | 1901.4 | 1901.4  | 1903.1 | 1899.1 | 1899.1  | 1902.4 |
| gdb 3512 | 1902.2 <sup>a</sup> | 1905.5 | 1905.4  | 1906.6 | 1907.1 | 1907.1  | 1908.6 |
| gdb 3513 | 1879.0 <sup>a</sup> | 1876.9 | 1876.9  | 1877.1 | 1873.1 | 1873.1  | 1871.2 |
| gdb 3514 | 1874.2 <sup>a</sup> | 1875.0 | 1875.0  | 1877.3 | 1873.9 | 1873.9  | 1876.3 |
| gdb 3515 | 1906.4 <sup>a</sup> | 1907.8 | 1907.8  | 1909.5 | 1904.4 | 1904.4  | 1908.3 |
| gdb 3516 | 1895.5 <sup>a</sup> | 1901.4 | 1901.4  | 1903.2 | 1899.4 | 1899.4  | 1901.9 |
| gdb 3517 | 1903.1 <sup>a</sup> | 1910.6 | 1910.6  | 1912.1 | 1911.3 | 1911.3  | 1911.9 |
| gdb 3518 | 1877.1 <sup>a</sup> | 1879.1 | 1879.1  | 1882.8 | 1876.7 | 1876.7  | 1880.1 |
| gdb 3519 | 1916.2 <sup>a</sup> | 1926.9 | 1926.9  | 1926.7 | 1929.4 | 1929.4  | 1929.3 |
| gdb 3520 | 1918.4 <sup>a</sup> | 1923.1 | 1923.1  | 1925.0 | 1924.7 | 1924.7  | 1925.0 |
| gdb 3521 | 1930.5 <sup>a</sup> | 1924.9 | 1924.9  | 1925.7 | 1922.5 | 1922.5  | 1924.5 |
| gdb 3522 | 1922.8 <sup>a</sup> | 1937.3 | 1937.3  | 1937.5 | 1939.7 | 1939.7  | 1939.7 |
| gdb 3523 | 1909.7 <sup>a</sup> | 1915.7 | 1915.7  | 1917.8 | 1916.3 | 1916.3  | 1917.0 |
| gdb 3524 | 1906.9 <sup>a</sup> | 1912.5 | 1912.4  | 1914.5 | 1912.5 | 1912.4  | 1913.1 |
| gdb 3525 | 1916.5 <sup>a</sup> | 1918.6 | 1918.6  | 1919.0 | 1914.8 | 1914.8  | 1917.8 |
| gdb 3526 | 1898.9 <sup>a</sup> | 1909.0 | 1909.0  | 1910.5 | 1910.5 | 1910.5  | 1912.1 |
| gdb 3527 | 1878.8 <sup>a</sup> | 1880.9 | 1880.9  | 1883.4 | 1879.3 | 1879.2  | 1881.0 |
| gdb 3528 | 1875.4 <sup>a</sup> | 1877.3 | 1877.3  | 1879.4 | 1876.0 | 1876.0  | 1878.6 |
| gdb 3529 | 1901.1 <sup>a</sup> | 1890.6 | 1890.6  | 1892.1 | 1888.5 | 1888.5  | 1890.7 |
| gdb 3530 | 1883.9 <sup>a</sup> | 1892.2 | 1892.2  | 1894.8 | 1893.2 | 1893.2  | 1894.3 |
| gdb 3531 | 1906.5 <sup>a</sup> | 1914.8 | 1914.8  | 1916.2 | 1917.3 | 1917.2  | 1918.2 |
| gdb 3532 | 1875.0 <sup>a</sup> | 1877.1 | 1877.1  | 1875.9 | 1874.2 | 1874.1  | 1872.2 |
| gdb 3533 | 1897.4 <sup>a</sup> | 1884.4 | 1884.4  | 1885.4 | 1883.4 | 1883.3  | 1884.9 |
| gdb 3534 | 1879.3 <sup>a</sup> | 1885.0 | 1885.0  | 1886.8 | 1886.7 | 1886.7  | 1886.9 |
| gdb 3535 | 1898.1 <sup>a</sup> | 1906.0 | 1906.0  | 1907.5 | 1909.5 | 1909.5  | 1911.3 |
| gdb 3536 | 1905.6 <sup>a</sup> | 1909.9 | 1909.9  | 1910.8 | 1911.7 | 1911.7  | 1911.5 |
| gdb 3537 | 1902.2 <sup>a</sup> | 1902.2 | 1902.2  | 1900.0 | 1898.5 | 1898.5  | 1895.3 |
| gdb 3538 | 1903.9 <sup>a</sup> | 1904.8 | 1904.8  | 1906.3 | 1908.4 | 1908.4  | 1908.1 |
| gdb 3539 | 1916.2 <sup>a</sup> | 1911.8 | 1911.8  | 1912.1 | 1909.4 | 1909.4  | 1911.0 |
| gdb 3540 | 1895.8 <sup>a</sup> | 1902.3 | 1902.3  | 1904.2 | 1903.0 | 1902.8  | 1903.7 |
| gdb 3541 | 1895.3 <sup>a</sup> | 1900.1 | 1900.1  | 1897.8 | 1896.7 | 1896.7  | 1893.4 |
| gdb 3542 | 1914.1 <sup>a</sup> | 1913.9 | 1913.8  | 1914.5 | 1911.5 | 1911.5  | 1912.7 |
| gdb 3543 | 1903.1 <sup>a</sup> | 1911.4 | 1911.4  | 1912.4 | 1913.1 | 1913.1  | 1912.4 |
| gdb 3544 | 1905.3 <sup>a</sup> | 1909.0 | 1909.0  | 1909.7 | 1910.5 | 1910.5  | 1910.5 |
| gdb 3545 | 1903.2 <sup>a</sup> | 1906.2 | 1906.2  | 1907.8 | 1909.4 | 1909.4  | 1909.5 |
| gdb 3546 | 1901.8 <sup>a</sup> | 1902.1 | 1902.1  | 1900.0 | 1898.4 | 1898.4  | 1895.4 |
| gdb 3547 | 1916.1 <sup>a</sup> | 1911.8 | 1911.8  | 1912.4 | 1909.6 | 1909.5  | 1911.5 |
| gdb 3548 | 1896.3 <sup>a</sup> | 1897.7 | 1897.7  | 1899.5 | 1895.1 | 1895.1  | 1896.6 |
| gdb 3549 | 1912.1 <sup>a</sup> | 1909.2 | 1909.2  | 1911.2 | 1905.3 | 1905.3  | 1908.9 |
| gdb 3550 | 1902.6 <sup>a</sup> | 1907.5 | 1907.5  | 1909.5 | 1907.9 | 1907.9  | 1909.2 |
| gdb 3551 | 1898.1 <sup>a</sup> | 1901.6 | 1901.6  | 1903.3 | 1900.5 | 1900.5  | 1902.5 |
| gdb 3552 | 1893.7 <sup>a</sup> | 1897.5 | 1897.5  | 1899.1 | 1896.5 | 1896.5  | 1898.3 |
| gdb 3553 | 1913.9 <sup>a</sup> | 1917.2 | 1917.2  | 1918.9 | 1914.4 | 1914.4  | 1917.1 |
| gdb 3554 | 1901.8 <sup>a</sup> | 1914.1 | 1914.1  | 1915.9 | 1915.3 | 1915.3  | 1916.0 |
| gdb 3555 | 1917.0 <sup>a</sup> | 1921.2 | 1921.2  | 1923.1 | 1922.4 | 1922.3  | 1922.9 |
| gdb 3556 | 1924.3 <sup>a</sup> | 1921.2 | 1921.2  | 1921.4 | 1918.0 | 1918.0  | 1920.6 |
| gdb 3557 | 1914.0 <sup>a</sup> | 1917.6 | 1917.6  | 1918.9 | 1917.8 | 1917.8  | 1918.7 |
| gdb 3558 | 1911.7 <sup>a</sup> | 1914.6 | 1914.6  | 1915.8 | 1914.9 | 1914.8  | 1915.6 |
| gdb 3559 | 1920.7 <sup>a</sup> | 1917.3 | 1917.3  | 1918.0 | 1913.2 | 1913.2  | 1916.5 |
| gdb 3560 | 1924.8 <sup>a</sup> | 1934.1 | 1934.0  | 1934.4 | 1937.0 | 1937.0  | 1937.5 |
| gdb 3561 | 1912.7 <sup>a</sup> | 1918.6 | 1918.6  | 1920.4 | 1920.2 | 1920.1  | 1920.7 |
| gdb 3562 | 1919.7 <sup>a</sup> | 1920.4 | 1920.4  | 1921.2 | 1917.5 | 1917.4  | 1920.3 |
| gdb 3563 | 1897.6 <sup>a</sup> | 1903.4 | 1903.4  | 1901.3 | 1900.5 | 1900.5  | 1898.0 |
| gdb 3564 | 1910.7 <sup>a</sup> | 1908.8 | 1908.8  | 1909.5 | 1908.3 | 1908.3  | 1909.9 |
| gdb 3565 | 1911.7 <sup>a</sup> | 1913.2 | 1913.2  | 1913.9 | 1911.1 | 1911.1  | 1912.9 |
| gdb 3566 | 1899.7 <sup>a</sup> | 1911.5 | 1911.5  | 1913.4 | 1913.7 | 1913.7  | 1913.7 |
| gdb 3567 | 1917.8 <sup>a</sup> | 1928.5 | 1928.5  | 1929.3 | 1931.8 | 1931.8  | 1933.3 |
| gdb 3568 | 1898.9 <sup>a</sup> | 1899.6 | 1899.6  | 1897.4 | 1896.7 | 1896.7  | 1894.0 |
| gdb 3569 | 1906.0 <sup>a</sup> | 1902.2 | 1902.2  | 1903.0 | 1900.5 | 1900.5  | 1903.0 |
| gdb 3570 | 1910.8 <sup>a</sup> | 1909.3 | 1909.3  | 1909.3 | 1906.7 | 1906.6  | 1908.6 |
| gdb 3571 | 1900.6 <sup>a</sup> | 1906.8 | 1906.8  | 1908.5 | 1909.2 | 1909.2  | 1908.8 |
| gdb 3572 | 1912.3 <sup>a</sup> | 1918.9 | 1918.8  | 1920.7 | 1920.3 | 1920.3  | 1920.8 |

... continued on next page ...

Table S73: ... continued from previous page ...

| Species  | Ref.                | OM2    | OM2-D3T | ODM2   | OM3    | OM3-D3T | ODM3   |
|----------|---------------------|--------|---------|--------|--------|---------|--------|
| gdb 3573 | 1919.4 <sup>a</sup> | 1920.6 | 1920.6  | 1921.5 | 1917.4 | 1917.4  | 1920.3 |
| gdb 3574 | 1923.3 <sup>a</sup> | 1934.4 | 1934.4  | 1934.4 | 1936.9 | 1936.9  | 1937.1 |
| gdb 3575 | 1911.2 <sup>a</sup> | 1908.5 | 1908.5  | 1909.5 | 1906.0 | 1906.0  | 1909.4 |
| gdb 3576 | 1913.5 <sup>a</sup> | 1912.0 | 1912.0  | 1912.1 | 1909.5 | 1909.5  | 1912.3 |
| gdb 3577 | 1904.5 <sup>a</sup> | 1910.9 | 1910.9  | 1912.6 | 1912.2 | 1912.1  | 1913.1 |
| gdb 3578 | 1865.5 <sup>a</sup> | 1871.7 | 1871.7  | 1876.4 | 1869.8 | 1869.8  | 1871.1 |
| gdb 3579 | 1860.9 <sup>a</sup> | 1861.1 | 1861.1  | 1864.6 | 1856.4 | 1856.3  | 1858.4 |
| gdb 3580 | 1906.4 <sup>a</sup> | 1914.9 | 1914.9  | 1916.2 | 1917.1 | 1917.1  | 1917.7 |
| gdb 3581 | 1863.6 <sup>a</sup> | 1868.6 | 1868.5  | 1873.1 | 1866.3 | 1866.3  | 1867.9 |
| gdb 3582 | 1860.1 <sup>a</sup> | 1869.9 | 1869.9  | 1870.7 | 1867.7 | 1867.7  | 1865.7 |
| gdb 3583 | 1862.9 <sup>a</sup> | 1870.2 | 1870.2  | 1874.8 | 1867.8 | 1867.8  | 1868.6 |
| gdb 3584 | 1860.8 <sup>a</sup> | 1860.5 | 1860.5  | 1864.9 | 1855.7 | 1855.7  | 1858.0 |
| gdb 3585 | 1864.4 <sup>a</sup> | 1868.4 | 1868.4  | 1872.2 | 1867.2 | 1867.1  | 1868.7 |
| gdb 3586 | 1901.1 <sup>a</sup> | 1910.2 | 1910.1  | 1911.4 | 1911.5 | 1911.4  | 1912.7 |
| gdb 3587 | 1903.7 <sup>a</sup> | 1910.1 | 1910.1  | 1911.6 | 1910.0 | 1910.0  | 1911.6 |
| gdb 3588 | 1906.4 <sup>a</sup> | 1911.1 | 1911.1  | 1912.6 | 1911.0 | 1911.0  | 1911.9 |
| gdb 3589 | 1900.4 <sup>a</sup> | 1909.6 | 1909.6  | 1911.3 | 1906.2 | 1906.2  | 1908.7 |
| gdb 3590 | 1862.3 <sup>a</sup> | 1866.5 | 1866.5  | 1870.3 | 1866.5 | 1866.4  | 1868.0 |
| gdb 3591 | 1918.6 <sup>a</sup> | 1922.0 | 1922.0  | 1922.8 | 1923.5 | 1923.4  | 1923.0 |
| gdb 3592 | 1908.6 <sup>a</sup> | 1914.1 | 1914.1  | 1914.7 | 1915.6 | 1915.6  | 1916.5 |
| gdb 3593 | 1865.3 <sup>a</sup> | 1862.6 | 1862.6  | 1864.4 | 1860.9 | 1860.9  | 1862.4 |
| gdb 3594 | 1887.3 <sup>a</sup> | 1886.3 | 1886.3  | 1885.6 | 1881.4 | 1881.3  | 1878.5 |
| gdb 3595 | 1905.4 <sup>a</sup> | 1912.6 | 1912.6  | 1913.8 | 1914.2 | 1914.2  | 1915.2 |
| gdb 3596 | 1886.9 <sup>a</sup> | 1885.5 | 1885.5  | 1884.8 | 1880.9 | 1880.9  | 1878.1 |
| gdb 3597 | 1910.9 <sup>a</sup> | 1915.9 | 1915.9  | 1916.6 | 1917.1 | 1917.1  | 1917.0 |
| gdb 3598 | 1914.8 <sup>a</sup> | 1926.6 | 1926.6  | 1926.2 | 1928.6 | 1928.5  | 1928.0 |
| gdb 3599 | 1910.9 <sup>a</sup> | 1914.3 | 1914.3  | 1915.3 | 1914.4 | 1914.3  | 1914.4 |
| gdb 3600 | 1912.1 <sup>a</sup> | 1915.6 | 1915.6  | 1916.5 | 1915.4 | 1915.4  | 1915.7 |
| gdb 3601 | 1906.6 <sup>a</sup> | 1911.8 | 1911.8  | 1912.3 | 1908.5 | 1908.5  | 1910.4 |
| gdb 3602 | 1871.1 <sup>a</sup> | 1878.8 | 1878.8  | 1881.2 | 1875.0 | 1875.0  | 1876.9 |
| gdb 3603 | 1871.3 <sup>a</sup> | 1880.5 | 1880.5  | 1883.7 | 1870.9 | 1870.9  | 1875.3 |
| gdb 3604 | 1878.5 <sup>a</sup> | 1882.6 | 1882.6  | 1885.3 | 1882.4 | 1882.4  | 1883.3 |
| gdb 3605 | 1907.8 <sup>a</sup> | 1912.1 | 1912.1  | 1913.1 | 1912.8 | 1912.7  | 1913.5 |
| gdb 3606 | 1902.8 <sup>a</sup> | 1910.4 | 1910.4  | 1912.5 | 1911.7 | 1911.6  | 1912.9 |
| gdb 3607 | 1899.0 <sup>a</sup> | 1907.8 | 1907.8  | 1909.2 | 1905.8 | 1905.8  | 1908.1 |
| gdb 3608 | 1864.2 <sup>a</sup> | 1868.4 | 1868.4  | 1871.6 | 1865.9 | 1865.9  | 1867.1 |
| gdb 3609 | 1861.9 <sup>a</sup> | 1869.9 | 1869.9  | 1875.0 | 1867.0 | 1866.9  | 1868.1 |
| gdb 3610 | 1858.5 <sup>a</sup> | 1858.5 | 1858.5  | 1861.8 | 1854.0 | 1853.9  | 1855.9 |
| gdb 3611 | 1858.7 <sup>a</sup> | 1863.0 | 1863.0  | 1868.1 | 1863.6 | 1863.6  | 1865.8 |
| gdb 3612 | 1892.6 <sup>a</sup> | 1892.3 | 1892.3  | 1895.5 | 1893.3 | 1893.3  | 1894.7 |
| gdb 3613 | 1892.9 <sup>a</sup> | 1903.2 | 1903.2  | 1904.3 | 1904.2 | 1904.1  | 1906.1 |
| gdb 3614 | 1892.6 <sup>a</sup> | 1901.7 | 1901.6  | 1902.3 | 1903.4 | 1903.3  | 1903.7 |
| gdb 3615 | 1874.9 <sup>a</sup> | 1877.1 | 1877.1  | 1875.6 | 1873.8 | 1873.8  | 1871.4 |
| gdb 3616 | 1876.0 <sup>a</sup> | 1876.4 | 1876.4  | 1878.1 | 1875.2 | 1875.2  | 1875.8 |
| gdb 3617 | 1879.1 <sup>a</sup> | 1884.0 | 1884.0  | 1886.0 | 1885.6 | 1885.6  | 1885.1 |
| gdb 3618 | 1906.5 <sup>a</sup> | 1911.6 | 1911.6  | 1913.9 | 1913.1 | 1913.0  | 1914.4 |
| gdb 3619 | 1905.9 <sup>a</sup> | 1909.8 | 1909.8  | 1910.9 | 1910.8 | 1910.8  | 1911.8 |
| gdb 3620 | 1917.4 <sup>a</sup> | 1928.0 | 1928.0  | 1928.5 | 1930.9 | 1930.9  | 1931.8 |
| gdb 3621 | 1905.2 <sup>a</sup> | 1910.4 | 1910.4  | 1911.5 | 1911.8 | 1911.7  | 1913.1 |
| gdb 3622 | 1899.8 <sup>a</sup> | 1908.5 | 1908.5  | 1910.2 | 1906.4 | 1906.4  | 1908.7 |
| gdb 3623 | 1872.0 <sup>a</sup> | 1875.6 | 1875.6  | 1874.3 | 1871.7 | 1871.7  | 1869.7 |
| gdb 3624 | 1870.8 <sup>a</sup> | 1873.7 | 1873.7  | 1875.1 | 1872.2 | 1872.1  | 1873.4 |
| gdb 3625 | 1875.8 <sup>a</sup> | 1884.3 | 1884.3  | 1887.5 | 1885.3 | 1885.3  | 1886.2 |
| gdb 3626 | 1893.8 <sup>a</sup> | 1902.1 | 1902.1  | 1903.6 | 1904.7 | 1904.7  | 1906.8 |
| gdb 3627 | 1890.9 <sup>a</sup> | 1893.2 | 1893.1  | 1891.4 | 1889.8 | 1889.7  | 1887.8 |
| gdb 3628 | 1890.4 <sup>a</sup> | 1898.2 | 1898.1  | 1900.2 | 1896.6 | 1896.5  | 1898.5 |
| gdb 3629 | 1895.6 <sup>a</sup> | 1900.6 | 1900.6  | 1901.8 | 1902.5 | 1902.4  | 1903.0 |
| gdb 3630 | 1904.7 <sup>a</sup> | 1911.7 | 1911.6  | 1913.9 | 1913.3 | 1913.3  | 1914.7 |
| gdb 3631 | 1899.6 <sup>a</sup> | 1908.3 | 1908.3  | 1909.9 | 1906.3 | 1906.2  | 1908.5 |
| gdb 3632 | 1910.0 <sup>a</sup> | 1916.6 | 1916.6  | 1919.3 | 1917.2 | 1917.2  | 1918.3 |
| gdb 3633 | 1902.8 <sup>a</sup> | 1912.3 | 1912.3  | 1913.9 | 1909.9 | 1909.9  | 1911.8 |
| gdb 3634 | 1874.3 <sup>a</sup> | 1875.9 | 1875.8  | 1875.1 | 1867.8 | 1867.7  | 1866.7 |
| gdb 3635 | 1878.6 <sup>a</sup> | 1878.8 | 1878.8  | 1878.7 | 1874.6 | 1874.6  | 1872.7 |
| gdb 3636 | 1858.2 <sup>a</sup> | 1854.2 | 1854.2  | 1857.7 | 1851.0 | 1850.9  | 1853.5 |
| gdb 3637 | 1860.6 <sup>a</sup> | 1862.5 | 1862.5  | 1867.6 | 1862.9 | 1862.9  | 1865.0 |

... continued on next page ...

Table S73: ... continued from previous page ...

| Species  | Ref.                | OM2    | OM2-D3T | ODM2   | OM3    | OM3-D3T | ODM3   |
|----------|---------------------|--------|---------|--------|--------|---------|--------|
| gdb 3638 | 1916.6 <sup>a</sup> | 1928.1 | 1928.1  | 1928.7 | 1930.9 | 1930.9  | 1931.9 |
| gdb 3639 | 1872.3 <sup>a</sup> | 1880.2 | 1880.2  | 1880.2 | 1884.4 | 1876.5  | 1879.1 |
| gdb 3640 | 1869.0 <sup>a</sup> | 1879.8 | 1879.8  | 1882.5 | 1869.6 | 1869.6  | 1873.6 |
| gdb 3641 | 1876.2 <sup>a</sup> | 1882.0 | 1882.0  | 1885.8 | 1881.9 | 1881.9  | 1883.1 |
| gdb 3642 | 1898.4 <sup>a</sup> | 1905.7 | 1905.7  | 1907.2 | 1909.2 | 1909.1  | 1910.7 |
| gdb 3643 | 1913.6 <sup>a</sup> | 1910.7 | 1910.3  | 1911.3 | 1907.6 | 1907.6  | 1911.4 |
| gdb 3644 | 1896.1 <sup>a</sup> | 1904.3 | 1904.2  | 1906.1 | 1903.1 | 1903.1  | 1906.1 |
| gdb 3645 | 1901.1 <sup>a</sup> | 1905.7 | 1905.7  | 1908.4 | 1908.0 | 1908.0  | 1910.1 |
| gdb 3646 | 1898.2 <sup>a</sup> | 1903.8 | 1903.8  | 1904.6 | 1901.9 | 1901.8  | 1904.7 |
| gdb 3647 | 1904.3 <sup>a</sup> | 1907.2 | 1907.2  | 1909.7 | 1909.2 | 1909.1  | 1911.1 |
| gdb 3648 | 1848.1 <sup>a</sup> | 1853.6 | 1853.6  | 1858.3 | 1850.9 | 1850.8  | 1854.6 |
| gdb 3649 | 1891.8 <sup>a</sup> | 1899.7 | 1899.7  | 1899.6 | 1901.0 | 1901.0  | 1900.7 |
| gdb 3650 | 1844.0 <sup>a</sup> | 1841.9 | 1841.9  | 1845.5 | 1840.8 | 1840.7  | 1844.0 |
| gdb 3651 | 1853.8 <sup>a</sup> | 1849.9 | 1849.8  | 1852.9 | 1853.3 | 1853.3  | 1854.1 |
| gdb 3652 | 1899.4 <sup>a</sup> | 1907.8 | 1907.8  | 1907.8 | 1908.8 | 1908.8  | 1908.5 |
| gdb 3653 | 1870.9 <sup>a</sup> | 1869.6 | 1869.6  | 1867.2 | 1865.8 | 1865.8  | 1862.9 |
| gdb 3654 | 1872.0 <sup>a</sup> | 1871.8 | 1871.8  | 1869.6 | 1867.9 | 1867.9  | 1864.5 |
| gdb 3655 | 1872.4 <sup>a</sup> | 1874.7 | 1874.7  | 1876.6 | 1876.9 | 1876.9  | 1876.3 |
| gdb 3656 | 1892.4 <sup>a</sup> | 1897.2 | 1897.1  | 1897.3 | 1899.7 | 1899.7  | 1900.6 |
| gdb 3657 | 1881.7 <sup>a</sup> | 1884.4 | 1884.4  | 1886.8 | 1887.7 | 1887.7  | 1888.3 |
| gdb 3658 | 1900.1 <sup>a</sup> | 1885.4 | 1885.4  | 1886.2 | 1884.5 | 1884.5  | 1885.7 |
| gdb 3659 | 1885.1 <sup>a</sup> | 1887.7 | 1887.7  | 1889.6 | 1890.0 | 1890.0  | 1890.3 |
| gdb 3660 | 1880.9 <sup>a</sup> | 1881.9 | 1881.9  | 1880.7 | 1878.5 | 1878.5  | 1875.8 |
| gdb 3661 | 1832.5 <sup>a</sup> | 1818.5 | 1818.5  | 1819.7 | 1819.1 | 1819.1  | 1817.8 |
| gdb 3662 | 1835.8 <sup>a</sup> | 1817.5 | 1817.4  | 1815.6 | 1810.7 | 1810.7  | 1806.2 |
| gdb 3663 | 1848.8 <sup>a</sup> | 1822.9 | 1822.9  | 1824.6 | 1821.3 | 1821.3  | 1819.7 |
| gdb 3664 | 1844.1 <sup>a</sup> | 1823.7 | 1823.7  | 1828.3 | 1828.4 | 1828.3  | 1829.8 |
| gdb 3665 | 1823.7 <sup>a</sup> | 1813.7 | 1813.7  | 1814.3 | 1814.1 | 1814.1  | 1813.1 |
| gdb 3666 | 1830.3 <sup>a</sup> | 1818.7 | 1818.7  | 1821.0 | 1817.0 | 1817.0  | 1815.9 |
| gdb 3667 | 1842.3 <sup>a</sup> | 1819.5 | 1819.5  | 1822.3 | 1818.2 | 1818.2  | 1817.6 |
| gdb 3668 | 1827.9 <sup>a</sup> | 1810.5 | 1810.5  | 1808.7 | 1804.1 | 1804.0  | 1800.0 |
| gdb 3669 | 1840.0 <sup>a</sup> | 1822.0 | 1822.0  | 1826.3 | 1826.7 | 1826.7  | 1828.4 |
| gdb 3670 | 1859.1 <sup>a</sup> | 1850.1 | 1850.1  | 1850.7 | 1843.5 | 1843.5  | 1842.8 |
| gdb 3671 | 1860.5 <sup>a</sup> | 1851.4 | 1851.4  | 1849.9 | 1843.5 | 1843.4  | 1840.5 |
| gdb 3672 | 1859.3 <sup>a</sup> | 1852.9 | 1852.9  | 1856.5 | 1853.0 | 1853.0  | 1855.3 |
| gdb 3673 | 1860.5 <sup>a</sup> | 1854.6 | 1854.6  | 1856.2 | 1853.5 | 1853.4  | 1853.5 |
| gdb 3674 | 1849.4 <sup>a</sup> | 1841.4 | 1841.4  | 1840.9 | 1839.0 | 1839.0  | 1836.4 |
| gdb 3675 | 1850.6 <sup>a</sup> | 1845.4 | 1845.4  | 1845.6 | 1841.4 | 1841.4  | 1838.6 |
| gdb 3676 | 1856.5 <sup>a</sup> | 1847.7 | 1847.6  | 1847.0 | 1843.7 | 1843.7  | 1840.6 |
| gdb 3677 | 1849.9 <sup>a</sup> | 1839.0 | 1839.0  | 1835.3 | 1830.0 | 1830.0  | 1824.6 |
| gdb 3678 | 1855.0 <sup>a</sup> | 1850.4 | 1850.4  | 1854.6 | 1852.9 | 1852.9  | 1853.2 |
| gdb 3679 | 1882.5 <sup>a</sup> | 1878.8 | 1878.8  | 1884.1 | 1874.3 | 1874.3  | 1877.1 |
| gdb 3680 | 1885.1 <sup>a</sup> | 1885.3 | 1885.3  | 1887.3 | 1886.8 | 1886.8  | 1887.2 |
| gdb 3681 | 1880.0 <sup>a</sup> | 1883.0 | 1883.0  | 1885.1 | 1886.7 | 1886.7  | 1887.5 |
| gdb 3682 | 1880.6 <sup>a</sup> | 1884.5 | 1884.5  | 1887.2 | 1886.9 | 1886.9  | 1887.4 |
| gdb 3683 | 1896.0 <sup>a</sup> | 1879.6 | 1879.6  | 1880.8 | 1880.3 | 1880.3  | 1882.0 |
| gdb 3684 | 1881.5 <sup>a</sup> | 1881.6 | 1881.6  | 1880.7 | 1879.1 | 1879.1  | 1877.0 |
| gdb 3685 | 1882.4 <sup>a</sup> | 1886.0 | 1886.0  | 1887.6 | 1888.0 | 1888.0  | 1887.7 |
| gdb 3686 | 1877.8 <sup>a</sup> | 1873.7 | 1873.7  | 1875.6 | 1874.6 | 1874.6  | 1875.1 |
| gdb 3687 | 1882.2 <sup>a</sup> | 1884.6 | 1884.6  | 1886.6 | 1887.8 | 1887.7  | 1887.9 |
| gdb 3688 | 1879.9 <sup>a</sup> | 1881.8 | 1881.8  | 1880.5 | 1878.3 | 1878.3  | 1875.4 |
| gdb 3689 | 1885.6 <sup>a</sup> | 1883.3 | 1883.3  | 1883.4 | 1879.1 | 1879.1  | 1877.2 |
| gdb 3690 | 1878.1 <sup>a</sup> | 1876.6 | 1876.6  | 1880.1 | 1876.8 | 1876.7  | 1878.8 |
| gdb 3691 | 1882.7 <sup>a</sup> | 1882.8 | 1882.8  | 1884.9 | 1884.7 | 1884.7  | 1885.4 |
| gdb 3692 | 1868.2 <sup>a</sup> | 1865.7 | 1865.7  | 1867.7 | 1866.6 | 1866.6  | 1868.2 |
| gdb 3693 | 1875.4 <sup>a</sup> | 1876.0 | 1876.0  | 1874.9 | 1872.8 | 1872.7  | 1871.1 |
| gdb 3694 | 1872.1 <sup>a</sup> | 1876.9 | 1876.9  | 1878.9 | 1880.3 | 1880.2  | 1881.7 |
| gdb 3695 | 1848.4 <sup>a</sup> | 1830.0 | 1830.0  | 1833.3 | 1833.2 | 1833.2  | 1834.1 |
| gdb 3696 | 1852.2 <sup>a</sup> | 1843.3 | 1843.3  | 1842.5 | 1841.2 | 1841.2  | 1838.6 |
| gdb 3697 | 1853.7 <sup>a</sup> | 1840.3 | 1840.3  | 1836.5 | 1832.0 | 1832.0  | 1826.6 |
| gdb 3698 | 1857.1 <sup>a</sup> | 1844.7 | 1844.7  | 1844.7 | 1843.2 | 1843.1  | 1840.7 |
| gdb 3699 | 1853.7 <sup>a</sup> | 1845.2 | 1845.2  | 1848.1 | 1849.8 | 1849.8  | 1850.2 |
| gdb 3700 | 1853.4 <sup>a</sup> | 1848.7 | 1848.7  | 1845.1 | 1839.9 | 1839.9  | 1834.6 |
| gdb 3701 | 1848.2 <sup>a</sup> | 1838.1 | 1838.1  | 1841.6 | 1840.9 | 1840.9  | 1841.6 |
| gdb 3702 | 1849.4 <sup>a</sup> | 1849.7 | 1849.7  | 1849.1 | 1847.1 | 1847.1  | 1844.5 |

... continued on next page ...

Table S73: ... continued from previous page ...

| Species  | Ref.                | OM2    | OM2-D3T | ODM2   | OM3    | OM3-D3T | ODM3   |
|----------|---------------------|--------|---------|--------|--------|---------|--------|
| gdb 3703 | 1844.2 <sup>a</sup> | 1827.1 | 1827.1  | 1830.8 | 1830.0 | 1830.0  | 1831.1 |
| gdb 3704 | 1842.9 <sup>a</sup> | 1826.9 | 1826.9  | 1829.8 | 1829.3 | 1829.3  | 1830.2 |
| gdb 3705 | 1851.8 <sup>a</sup> | 1842.7 | 1842.7  | 1842.2 | 1840.6 | 1840.6  | 1838.1 |
| gdb 3706 | 1849.4 <sup>a</sup> | 1843.8 | 1843.8  | 1846.2 | 1848.0 | 1848.0  | 1848.4 |
| gdb 3707 | 1845.3 <sup>a</sup> | 1830.1 | 1830.1  | 1832.7 | 1832.6 | 1832.6  | 1833.4 |
| gdb 3708 | 1851.6 <sup>a</sup> | 1842.8 | 1842.8  | 1842.2 | 1840.6 | 1840.6  | 1838.1 |
| gdb 3709 | 1846.3 <sup>a</sup> | 1830.2 | 1830.2  | 1833.2 | 1832.7 | 1832.7  | 1833.3 |
| gdb 3710 | 1857.2 <sup>a</sup> | 1845.6 | 1845.6  | 1845.8 | 1843.5 | 1843.5  | 1840.9 |
| gdb 3711 | 1854.6 <sup>a</sup> | 1841.0 | 1841.0  | 1837.2 | 1832.5 | 1832.5  | 1827.1 |
| gdb 3712 | 1855.1 <sup>a</sup> | 1846.2 | 1846.2  | 1849.3 | 1850.8 | 1850.8  | 1851.0 |
| gdb 3713 | 1864.5 <sup>a</sup> | 1853.4 | 1853.4  | 1852.4 | 1845.8 | 1845.8  | 1843.7 |
| gdb 3714 | 1863.4 <sup>a</sup> | 1856.0 | 1856.0  | 1858.2 | 1854.8 | 1854.8  | 1855.4 |
| gdb 3715 | 1861.9 <sup>a</sup> | 1851.6 | 1851.6  | 1856.5 | 1852.6 | 1852.6  | 1855.1 |
| gdb 3716 | 1875.8 <sup>a</sup> | 1870.1 | 1870.1  | 1865.8 | 1861.6 | 1861.5  | 1856.1 |
| gdb 3717 | 1865.6 <sup>a</sup> | 1864.3 | 1864.3  | 1867.6 | 1866.0 | 1866.0  | 1867.3 |
| gdb 3718 | 1873.6 <sup>a</sup> | 1870.3 | 1870.3  | 1869.1 | 1867.9 | 1867.9  | 1865.3 |
| gdb 3719 | 1846.4 <sup>a</sup> | 1835.2 | 1835.1  | 1838.7 | 1831.9 | 1831.9  | 1834.7 |
| gdb 3720 | 1851.6 <sup>a</sup> | 1845.4 | 1845.3  | 1845.9 | 1838.2 | 1838.2  | 1837.7 |
| gdb 3721 | 1852.8 <sup>a</sup> | 1845.2 | 1845.2  | 1845.7 | 1838.3 | 1838.3  | 1838.0 |
| gdb 3722 | 1850.0 <sup>a</sup> | 1846.7 | 1846.7  | 1850.2 | 1846.1 | 1846.1  | 1848.5 |
| gdb 3723 | 1850.5 <sup>a</sup> | 1846.7 | 1846.7  | 1850.2 | 1846.3 | 1846.2  | 1848.8 |
| gdb 3724 | 1851.0 <sup>a</sup> | 1844.0 | 1843.9  | 1848.5 | 1844.7 | 1844.7  | 1846.8 |
| gdb 3725 | 1886.5 <sup>a</sup> | 1885.1 | 1885.1  | 1885.3 | 1880.5 | 1880.5  | 1878.5 |
| gdb 3726 | 1884.3 <sup>a</sup> | 1886.7 | 1886.7  | 1890.1 | 1888.5 | 1888.5  | 1889.5 |
| gdb 3727 | 1891.1 <sup>a</sup> | 1897.4 | 1897.4  | 1898.8 | 1898.7 | 1898.7  | 1900.2 |
| gdb 3728 | 1910.1 <sup>a</sup> | 1907.4 | 1907.4  | 1907.8 | 1907.5 | 1907.5  | 1909.0 |
| gdb 3729 | 1908.9 <sup>a</sup> | 1908.6 | 1908.6  | 1909.3 | 1907.2 | 1907.2  | 1909.2 |
| gdb 3730 | 1900.0 <sup>a</sup> | 1904.6 | 1904.6  | 1902.5 | 1902.5 | 1902.4  | 1899.8 |
| gdb 3731 | 1898.0 <sup>a</sup> | 1905.4 | 1905.2  | 1906.3 | 1909.3 | 1909.2  | 1909.3 |
| gdb 3732 | 1877.7 <sup>a</sup> | 1876.6 | 1876.6  | 1879.7 | 1877.1 | 1877.1  | 1878.7 |
| gdb 3733 | 1845.9 <sup>a</sup> | 1836.2 | 1836.2  | 1834.9 | 1830.3 | 1830.3  | 1827.8 |
| gdb 3734 | 1855.0 <sup>a</sup> | 1849.2 | 1849.2  | 1845.6 | 1839.6 | 1839.6  | 1833.7 |
| gdb 3735 | 1849.0 <sup>a</sup> | 1839.2 | 1839.2  | 1838.2 | 1833.4 | 1833.3  | 1830.8 |
| gdb 3736 | 1853.0 <sup>a</sup> | 1850.9 | 1850.9  | 1850.6 | 1847.7 | 1847.7  | 1844.9 |
| gdb 3737 | 1846.6 <sup>a</sup> | 1840.3 | 1840.3  | 1842.3 | 1841.3 | 1841.2  | 1841.6 |
| gdb 3738 | 1846.5 <sup>a</sup> | 1840.1 | 1840.1  | 1842.8 | 1840.9 | 1840.8  | 1841.2 |
| gdb 3739 | 1867.0 <sup>a</sup> | 1868.5 | 1868.5  | 1869.8 | 1867.4 | 1867.4  | 1868.9 |
| gdb 3740 | 1867.6 <sup>a</sup> | 1863.9 | 1863.9  | 1865.7 | 1864.9 | 1864.8  | 1866.9 |
| gdb 3741 | 1874.0 <sup>a</sup> | 1876.1 | 1876.1  | 1875.2 | 1872.6 | 1872.6  | 1871.2 |
| gdb 3742 | 1872.0 <sup>a</sup> | 1877.7 | 1877.7  | 1879.8 | 1880.6 | 1880.5  | 1881.7 |
| gdb 3743 | 1865.9 <sup>a</sup> | 1859.8 | 1859.8  | 1858.6 | 1854.4 | 1854.4  | 1852.8 |
| gdb 3744 | 1875.3 <sup>a</sup> | 1867.2 | 1867.2  | 1862.8 | 1858.4 | 1858.4  | 1852.4 |
| gdb 3745 | 1865.9 <sup>a</sup> | 1863.2 | 1863.2  | 1862.7 | 1857.2 | 1857.2  | 1855.9 |
| gdb 3746 | 1873.8 <sup>a</sup> | 1868.7 | 1868.7  | 1867.3 | 1866.3 | 1866.2  | 1863.2 |
| gdb 3747 | 1864.4 <sup>a</sup> | 1865.1 | 1865.1  | 1867.6 | 1865.3 | 1865.3  | 1866.7 |
| gdb 3748 | 1869.0 <sup>a</sup> | 1865.9 | 1865.9  | 1868.9 | 1866.8 | 1866.8  | 1867.9 |
| gdb 3749 | 1878.2 <sup>a</sup> | 1876.8 | 1876.8  | 1880.1 | 1877.2 | 1877.1  | 1878.9 |
| gdb 3750 | 1877.6 <sup>a</sup> | 1874.3 | 1874.3  | 1877.3 | 1874.7 | 1874.7  | 1877.1 |
| gdb 3751 | 1911.8 <sup>a</sup> | 1909.2 | 1909.2  | 1909.9 | 1907.3 | 1907.3  | 1908.7 |
| gdb 3752 | 1892.1 <sup>a</sup> | 1900.3 | 1900.3  | 1902.0 | 1899.4 | 1899.4  | 1900.8 |
| gdb 3753 | 1894.0 <sup>a</sup> | 1898.2 | 1898.2  | 1899.8 | 1899.2 | 1899.2  | 1900.1 |
| gdb 3754 | 1896.6 <sup>a</sup> | 1901.6 | 1901.6  | 1899.4 | 1898.5 | 1898.5  | 1895.2 |
| gdb 3755 | 1902.6 <sup>a</sup> | 1906.8 | 1906.8  | 1909.5 | 1909.2 | 1909.2  | 1909.4 |
| gdb 3756 | 1877.4 <sup>a</sup> | 1872.4 | 1872.4  | 1871.7 | 1864.9 | 1864.9  | 1864.5 |
| gdb 3757 | 1878.0 <sup>a</sup> | 1875.6 | 1875.6  | 1877.9 | 1874.6 | 1874.6  | 1877.0 |
| gdb 3758 | 1878.6 <sup>a</sup> | 1873.6 | 1873.6  | 1877.0 | 1873.9 | 1873.9  | 1876.3 |
| gdb 3759 | 1900.7 <sup>a</sup> | 1908.8 | 1908.8  | 1908.4 | 1910.4 | 1910.3  | 1908.6 |
| gdb 3760 | 1874.5 <sup>a</sup> | 1876.4 | 1876.4  | 1873.9 | 1872.0 | 1872.0  | 1867.5 |
| gdb 3761 | 1877.2 <sup>a</sup> | 1879.0 | 1879.0  | 1876.7 | 1874.6 | 1874.6  | 1870.0 |
| gdb 3762 | 1880.2 <sup>a</sup> | 1884.3 | 1884.3  | 1885.4 | 1886.2 | 1886.2  | 1884.2 |
| gdb 3763 | 1896.2 <sup>a</sup> | 1904.8 | 1904.8  | 1904.9 | 1907.6 | 1907.5  | 1907.0 |
| gdb 3764 | 1854.2 <sup>a</sup> | 1859.4 | 1859.3  | 1862.1 | 1858.9 | 1858.6  | 1859.1 |
| gdb 3765 | 1855.2 <sup>a</sup> | 1857.1 | 1857.1  | 1856.5 | 1850.1 | 1850.1  | 1847.4 |
| gdb 3766 | 1887.5 <sup>a</sup> | 1895.1 | 1895.0  | 1895.4 | 1897.7 | 1897.6  | 1898.5 |
| gdb 3767 | 1870.8 <sup>a</sup> | 1869.0 | 1869.0  | 1866.5 | 1865.4 | 1865.3  | 1862.0 |

... continued on next page ...

Table S73: ... continued from previous page ...

| Species  | Ref.                | OM2    | OM2-D3T | ODM2   | OM3    | OM3-D3T | ODM3   |
|----------|---------------------|--------|---------|--------|--------|---------|--------|
| gdb 3768 | 1875.5 <sup>a</sup> | 1872.6 | 1872.6  | 1870.5 | 1869.1 | 1869.1  | 1866.2 |
| gdb 3769 | 1873.3 <sup>a</sup> | 1873.5 | 1873.5  | 1873.5 | 1874.4 | 1875.8  | 1875.2 |
| gdb 3770 | 1833.3 <sup>a</sup> | 1815.4 | 1815.4  | 1813.9 | 1808.7 | 1808.7  | 1804.9 |
| gdb 3771 | 1835.2 <sup>a</sup> | 1819.2 | 1819.2  | 1821.0 | 1818.8 | 1818.8  | 1817.6 |
| gdb 3772 | 1845.7 <sup>a</sup> | 1829.2 | 1829.2  | 1828.5 | 1824.5 | 1824.5  | 1822.7 |
| gdb 3773 | 1844.1 <sup>a</sup> | 1827.5 | 1827.5  | 1826.6 | 1822.8 | 1822.8  | 1821.2 |
| gdb 3774 | 1851.4 <sup>a</sup> | 1839.6 | 1839.6  | 1835.8 | 1830.5 | 1830.5  | 1825.0 |
| gdb 3775 | 1844.1 <sup>a</sup> | 1832.3 | 1832.3  | 1835.0 | 1834.0 | 1834.0  | 1834.9 |
| gdb 3776 | 1843.7 <sup>a</sup> | 1830.3 | 1830.3  | 1832.6 | 1831.9 | 1831.9  | 1833.0 |
| gdb 3777 | 1852.4 <sup>a</sup> | 1843.7 | 1843.7  | 1843.4 | 1841.1 | 1841.1  | 1838.3 |
| gdb 3778 | 1873.9 <sup>a</sup> | 1873.7 | 1873.7  | 1872.9 | 1866.9 | 1866.9  | 1866.0 |
| gdb 3779 | 1874.3 <sup>a</sup> | 1876.9 | 1876.9  | 1879.3 | 1876.2 | 1876.2  | 1877.8 |
| gdb 3780 | 1830.4 <sup>a</sup> | 1813.2 | 1813.2  | 1812.0 | 1807.0 | 1807.0  | 1803.8 |
| gdb 3781 | 1828.4 <sup>a</sup> | 1815.3 | 1815.3  | 1816.7 | 1815.4 | 1815.3  | 1814.8 |
| gdb 3782 | 1841.9 <sup>a</sup> | 1826.0 | 1826.0  | 1825.7 | 1821.6 | 1821.6  | 1820.5 |
| gdb 3783 | 1841.5 <sup>a</sup> | 1828.8 | 1828.8  | 1831.8 | 1830.6 | 1830.6  | 1832.2 |
| gdb 3784 | 1897.6 <sup>a</sup> | 1881.2 | 1881.2  | 1882.6 | 1881.0 | 1881.0  | 1883.2 |
| gdb 3785 | 1879.0 <sup>a</sup> | 1878.6 | 1878.6  | 1877.8 | 1876.5 | 1876.5  | 1874.8 |
| gdb 3786 | 1878.3 <sup>a</sup> | 1880.6 | 1880.6  | 1883.0 | 1884.9 | 1884.9  | 1885.8 |
| gdb 3787 | 1869.4 <sup>a</sup> | 1868.3 | 1868.3  | 1866.0 | 1865.3 | 1865.2  | 1862.2 |
| gdb 3788 | 1872.9 <sup>a</sup> | 1870.7 | 1870.7  | 1868.5 | 1868.3 | 1868.2  | 1865.3 |
| gdb 3789 | 1872.5 <sup>a</sup> | 1873.2 | 1873.2  | 1874.4 | 1877.0 | 1877.0  | 1876.8 |
| gdb 3790 | 1847.7 <sup>a</sup> | 1838.6 | 1838.6  | 1835.2 | 1830.0 | 1829.9  | 1825.0 |
| gdb 3791 | 1843.8 <sup>a</sup> | 1830.3 | 1830.3  | 1829.9 | 1825.4 | 1825.4  | 1823.8 |
| gdb 3792 | 1846.0 <sup>a</sup> | 1841.4 | 1841.4  | 1841.3 | 1839.0 | 1839.0  | 1836.7 |
| gdb 3793 | 1845.8 <sup>a</sup> | 1833.1 | 1833.1  | 1835.9 | 1834.7 | 1834.7  | 1835.8 |
| gdb 3794 | 1894.1 <sup>a</sup> | 1879.3 | 1879.3  | 1880.3 | 1878.7 | 1878.7  | 1880.6 |
| gdb 3795 | 1873.2 <sup>a</sup> | 1871.3 | 1871.3  | 1873.1 | 1871.0 | 1871.0  | 1872.3 |
| gdb 3796 | 1877.2 <sup>a</sup> | 1877.7 | 1877.7  | 1876.7 | 1875.2 | 1875.2  | 1873.2 |
| gdb 3797 | 1878.1 <sup>a</sup> | 1881.1 | 1881.1  | 1883.5 | 1884.8 | 1884.7  | 1885.4 |
| gdb 3798 | 1874.6 <sup>a</sup> | 1874.5 | 1874.5  | 1873.9 | 1867.3 | 1867.3  | 1866.4 |
| gdb 3799 | 1874.8 <sup>a</sup> | 1876.9 | 1876.9  | 1879.4 | 1876.3 | 1876.3  | 1878.2 |
| gdb 3800 | 1889.6 <sup>a</sup> | 1895.8 | 1895.6  | 1895.7 | 1898.9 | 1898.7  | 1899.0 |
| gdb 3801 | 1839.6 <sup>a</sup> | 1836.4 | 1836.5  | 1834.0 | 1829.4 | 1829.4  | 1828.3 |
| gdb 3802 | 1840.5 <sup>a</sup> | 1839.3 | 1839.2  | 1840.0 | 1838.5 | 1838.5  | 1840.1 |
| gdb 3803 | 1843.3 <sup>a</sup> | 1841.4 | 1841.4  | 1843.0 | 1841.4 | 1841.3  | 1843.1 |
| gdb 3804 | 1877.3 <sup>a</sup> | 1876.7 | 1876.7  | 1879.9 | 1879.0 | 1879.0  | 1880.4 |
| gdb 3805 | 1879.5 <sup>a</sup> | 1874.7 | 1874.7  | 1878.1 | 1876.5 | 1876.5  | 1878.0 |
| gdb 3806 | 1870.0 <sup>a</sup> | 1859.4 | 1859.4  | 1860.6 | 1860.5 | 1860.5  | 1862.0 |
| gdb 3807 | 1886.5 <sup>a</sup> | 1892.2 | 1892.2  | 1894.9 | 1893.0 | 1893.0  | 1894.3 |
| gdb 3808 | 1900.8 <sup>a</sup> | 1889.9 | 1889.9  | 1891.7 | 1887.5 | 1887.5  | 1890.0 |
| gdb 3809 | 1886.2 <sup>a</sup> | 1891.8 | 1891.8  | 1894.8 | 1892.5 | 1892.5  | 1893.6 |
| gdb 3810 | 1883.1 <sup>a</sup> | 1882.8 | 1882.8  | 1885.2 | 1881.4 | 1881.4  | 1883.3 |
| gdb 3811 | 1871.9 <sup>a</sup> | 1861.7 | 1861.7  | 1865.2 | 1861.1 | 1861.1  | 1862.8 |
| gdb 3812 | 1868.5 <sup>a</sup> | 1856.8 | 1856.8  | 1860.0 | 1857.3 | 1857.3  | 1859.1 |
| gdb 3813 | 1864.1 <sup>a</sup> | 1852.8 | 1852.8  | 1855.5 | 1849.5 | 1849.5  | 1852.5 |
| gdb 3814 | 1878.1 <sup>a</sup> | 1873.8 | 1873.8  | 1878.0 | 1876.3 | 1876.3  | 1877.6 |
| gdb 3815 | 1858.8 <sup>a</sup> | 1845.8 | 1845.8  | 1847.9 | 1844.3 | 1844.3  | 1844.7 |
| gdb 3816 | 1861.3 <sup>a</sup> | 1846.8 | 1846.8  | 1849.6 | 1845.7 | 1845.7  | 1845.8 |
| gdb 3817 | 1856.3 <sup>a</sup> | 1843.7 | 1843.7  | 1846.1 | 1839.1 | 1839.1  | 1840.1 |
| gdb 3818 | 1872.1 <sup>a</sup> | 1856.1 | 1856.1  | 1862.4 | 1858.4 | 1858.4  | 1861.2 |
| gdb 3819 | 1851.0 <sup>a</sup> | 1850.9 | 1850.9  | 1851.1 | 1845.4 | 1845.3  | 1843.6 |
| gdb 3820 | 1850.5 <sup>a</sup> | 1850.8 | 1850.8  | 1851.6 | 1845.2 | 1845.1  | 1843.3 |
| gdb 3821 | 1849.7 <sup>a</sup> | 1841.5 | 1841.5  | 1841.5 | 1833.6 | 1833.6  | 1832.5 |
| gdb 3822 | 1866.1 <sup>a</sup> | 1862.6 | 1862.6  | 1867.7 | 1862.8 | 1862.7  | 1864.2 |
| gdb 3823 | 1893.5 <sup>a</sup> | 1899.3 | 1899.3  | 1904.0 | 1898.9 | 1898.9  | 1900.8 |
| gdb 3824 | 1884.0 <sup>a</sup> | 1891.7 | 1891.7  | 1895.9 | 1892.9 | 1892.9  | 1895.3 |
| gdb 3825 | 1903.0 <sup>a</sup> | 1890.8 | 1890.8  | 1892.7 | 1888.8 | 1888.8  | 1891.5 |
| gdb 3826 | 1885.6 <sup>a</sup> | 1892.4 | 1892.4  | 1895.9 | 1893.6 | 1893.6  | 1895.5 |
| gdb 3827 | 1884.9 <sup>a</sup> | 1883.8 | 1883.7  | 1886.6 | 1882.7 | 1882.7  | 1885.4 |
| gdb 3828 | 1882.1 <sup>a</sup> | 1879.1 | 1879.1  | 1880.2 | 1880.8 | 1880.8  | 1881.4 |
| gdb 3829 | 1876.5 <sup>a</sup> | 1872.3 | 1872.3  | 1870.9 | 1868.4 | 1868.4  | 1866.2 |
| gdb 3830 | 1878.7 <sup>a</sup> | 1874.6 | 1874.6  | 1876.3 | 1877.8 | 1877.8  | 1878.6 |
| gdb 3831 | 1875.5 <sup>a</sup> | 1865.5 | 1865.5  | 1866.8 | 1866.1 | 1866.0  | 1867.6 |
| gdb 3832 | 1897.7 <sup>a</sup> | 1893.7 | 1893.7  | 1896.1 | 1895.2 | 1895.2  | 1896.9 |

... continued on next page ...

Table S73: ... continued from previous page ...

| Species  | Ref.                | OM2    | OM2-D3T | ODM2   | OM3    | OM3-D3T | ODM3   |
|----------|---------------------|--------|---------|--------|--------|---------|--------|
| gdb 3833 | 1890.8 <sup>a</sup> | 1888.4 | 1888.4  | 1889.0 | 1885.6 | 1885.6  | 1885.4 |
| gdb 3834 | 1897.9 <sup>a</sup> | 1892.4 | 1892.3  | 1895.5 | 1894.1 | 1894.1  | 1895.7 |
| gdb 3835 | 1889.3 <sup>a</sup> | 1887.5 | 1887.5  | 1889.4 | 1886.2 | 1886.2  | 1888.0 |
| gdb 3836 | 1896.1 <sup>a</sup> | 1901.6 | 1901.6  | 1904.4 | 1896.3 | 1896.3  | 1898.2 |
| gdb 3837 | 1894.8 <sup>a</sup> | 1903.2 | 1903.2  | 1903.9 | 1892.7 | 1892.7  | 1895.3 |
| gdb 3838 | 1900.8 <sup>a</sup> | 1902.7 | 1902.7  | 1907.2 | 1901.6 | 1901.6  | 1904.2 |
| gdb 3839 | 1901.9 <sup>a</sup> | 1908.2 | 1908.2  | 1908.8 | 1909.7 | 1909.7  | 1909.0 |
| gdb 3840 | 1901.6 <sup>a</sup> | 1902.1 | 1902.1  | 1899.8 | 1898.2 | 1898.2  | 1895.0 |
| gdb 3841 | 1903.9 <sup>a</sup> | 1906.4 | 1906.4  | 1907.9 | 1909.4 | 1909.4  | 1909.5 |
| gdb 3842 | 1897.4 <sup>a</sup> | 1901.7 | 1901.7  | 1903.3 | 1901.3 | 1901.3  | 1902.7 |
| gdb 3843 | 1892.1 <sup>a</sup> | 1887.3 | 1887.3  | 1887.1 | 1882.3 | 1882.2  | 1880.2 |
| gdb 3844 | 1888.8 <sup>a</sup> | 1887.1 | 1887.1  | 1889.3 | 1889.2 | 1889.2  | 1889.9 |
| gdb 3845 | 1873.9 <sup>a</sup> | 1865.3 | 1865.3  | 1867.7 | 1864.6 | 1864.6  | 1865.9 |
| gdb 3846 | 1879.9 <sup>a</sup> | 1876.4 | 1876.4  | 1879.3 | 1877.1 | 1877.0  | 1877.9 |
| gdb 3847 | 1891.6 <sup>a</sup> | 1899.5 | 1899.5  | 1904.4 | 1899.2 | 1899.1  | 1901.3 |
| gdb 3848 | 1870.1 <sup>a</sup> | 1869.1 | 1869.0  | 1872.2 | 1866.2 | 1866.2  | 1868.1 |
| gdb 3849 | 1877.6 <sup>a</sup> | 1882.1 | 1882.1  | 1885.3 | 1881.9 | 1881.9  | 1883.2 |
| gdb 3850 | 1869.2 <sup>a</sup> | 1872.7 | 1872.7  | 1876.0 | 1870.1 | 1870.1  | 1872.8 |
| gdb 3851 | 1878.0 <sup>a</sup> | 1880.8 | 1880.8  | 1883.9 | 1881.2 | 1881.2  | 1882.2 |
| gdb 3852 | 1837.3 <sup>a</sup> | 1819.0 | 1819.0  | 1821.5 | 1814.3 | 1814.3  | 1814.9 |
| gdb 3853 | 1835.4 <sup>a</sup> | 1826.4 | 1826.4  | 1828.9 | 1824.5 | 1824.5  | 1824.6 |
| gdb 3854 | 1842.7 <sup>a</sup> | 1823.8 | 1823.7  | 1827.2 | 1822.0 | 1822.0  | 1825.4 |
| gdb 3855 | 1847.3 <sup>a</sup> | 1838.3 | 1838.3  | 1843.0 | 1838.3 | 1838.3  | 1841.2 |
| gdb 3856 | 1902.0 <sup>a</sup> | 1891.3 | 1891.3  | 1893.7 | 1890.2 | 1890.2  | 1893.3 |
| gdb 3857 | 1883.8 <sup>a</sup> | 1885.9 | 1885.9  | 1888.9 | 1885.6 | 1885.6  | 1888.2 |
| gdb 3858 | 1884.3 <sup>a</sup> | 1892.9 | 1892.9  | 1897.4 | 1895.1 | 1895.1  | 1897.6 |
| gdb 3859 | 1880.8 <sup>a</sup> | 1890.4 | 1890.4  | 1895.1 | 1887.6 | 1887.6  | 1890.8 |
| gdb 3860 | 1883.2 <sup>a</sup> | 1883.8 | 1883.8  | 1886.5 | 1885.3 | 1885.3  | 1885.6 |
| gdb 3861 | 1878.2 <sup>a</sup> | 1876.4 | 1876.4  | 1874.9 | 1872.2 | 1872.2  | 1869.2 |
| gdb 3862 | 1877.1 <sup>a</sup> | 1869.9 | 1869.8  | 1871.8 | 1870.3 | 1870.3  | 1871.0 |
| gdb 3863 | 1847.9 <sup>a</sup> | 1839.5 | 1839.4  | 1835.6 | 1830.0 | 1830.0  | 1824.3 |
| gdb 3864 | 1847.2 <sup>a</sup> | 1831.1 | 1831.1  | 1830.5 | 1826.1 | 1826.1  | 1824.3 |
| gdb 3865 | 1853.3 <sup>a</sup> | 1846.1 | 1846.1  | 1846.4 | 1842.5 | 1842.4  | 1840.0 |
| gdb 3866 | 1853.3 <sup>a</sup> | 1847.4 | 1847.3  | 1846.6 | 1842.9 | 1842.9  | 1839.5 |
| gdb 3867 | 1882.1 <sup>a</sup> | 1877.9 | 1877.9  | 1878.9 | 1879.7 | 1879.7  | 1880.2 |
| gdb 3868 | 1879.2 <sup>a</sup> | 1875.3 | 1875.3  | 1877.0 | 1878.4 | 1878.4  | 1879.0 |
| gdb 3869 | 1877.1 <sup>a</sup> | 1872.4 | 1872.4  | 1870.7 | 1868.7 | 1868.7  | 1866.2 |
| gdb 3870 | 1873.1 <sup>a</sup> | 1863.9 | 1863.9  | 1865.2 | 1864.6 | 1864.6  | 1865.8 |
| gdb 3871 | 1884.9 <sup>a</sup> | 1883.0 | 1883.0  | 1884.1 | 1880.0 | 1880.0  | 1880.7 |
| gdb 3872 | 1884.5 <sup>a</sup> | 1883.0 | 1883.0  | 1885.3 | 1880.9 | 1880.9  | 1883.2 |
| gdb 3873 | 1891.5 <sup>a</sup> | 1888.6 | 1888.5  | 1892.9 | 1889.5 | 1889.5  | 1892.7 |
| gdb 3874 | 1885.2 <sup>a</sup> | 1883.9 | 1883.9  | 1882.2 | 1879.3 | 1879.3  | 1876.5 |
| gdb 3875 | 1852.1 <sup>a</sup> | 1848.4 | 1848.4  | 1844.5 | 1838.5 | 1838.5  | 1832.4 |
| gdb 3876 | 1849.5 <sup>a</sup> | 1841.5 | 1841.5  | 1840.4 | 1835.3 | 1835.2  | 1832.3 |
| gdb 3877 | 1854.8 <sup>a</sup> | 1855.9 | 1855.9  | 1856.0 | 1851.2 | 1851.1  | 1847.8 |
| gdb 3878 | 1855.7 <sup>a</sup> | 1857.0 | 1857.0  | 1857.2 | 1852.5 | 1852.5  | 1849.4 |
| gdb 3879 | 1871.7 <sup>a</sup> | 1875.7 | 1875.6  | 1874.3 | 1871.9 | 1871.8  | 1870.0 |
| gdb 3880 | 1870.2 <sup>a</sup> | 1868.6 | 1868.6  | 1870.3 | 1869.2 | 1869.2  | 1870.9 |
| gdb 3881 | 1873.9 <sup>a</sup> | 1882.8 | 1882.8  | 1886.0 | 1884.5 | 1884.4  | 1885.9 |
| gdb 3882 | 1872.9 <sup>a</sup> | 1866.6 | 1866.6  | 1862.1 | 1857.1 | 1857.1  | 1851.0 |
| gdb 3883 | 1868.2 <sup>a</sup> | 1864.7 | 1864.6  | 1863.4 | 1858.6 | 1858.6  | 1856.6 |
| gdb 3884 | 1875.6 <sup>a</sup> | 1873.7 | 1873.7  | 1873.2 | 1869.4 | 1869.3  | 1866.1 |
| gdb 3885 | 1875.7 <sup>a</sup> | 1875.2 | 1875.1  | 1874.7 | 1871.3 | 1871.3  | 1868.2 |
| gdb 3886 | 1885.5 <sup>a</sup> | 1885.4 | 1885.4  | 1884.9 | 1881.0 | 1881.0  | 1878.5 |
| gdb 3887 | 1910.5 <sup>a</sup> | 1909.2 | 1909.2  | 1909.8 | 1908.5 | 1908.5  | 1909.8 |
| gdb 3888 | 1897.1 <sup>a</sup> | 1903.7 | 1903.7  | 1901.5 | 1900.6 | 1900.6  | 1897.8 |
| gdb 3889 | 1893.0 <sup>a</sup> | 1901.9 | 1901.8  | 1903.5 | 1902.4 | 1902.3  | 1903.5 |
| gdb 3890 | 1900.1 <sup>a</sup> | 1908.2 | 1908.2  | 1908.8 | 1910.1 | 1910.1  | 1909.4 |
| gdb 3891 | 1887.4 <sup>a</sup> | 1883.0 | 1883.0  | 1882.7 | 1878.8 | 1878.8  | 1876.6 |
| gdb 3892 | 1872.8 <sup>a</sup> | 1875.9 | 1875.9  | 1874.9 | 1872.1 | 1872.1  | 1870.1 |
| gdb 3893 | 1873.4 <sup>a</sup> | 1870.5 | 1870.5  | 1872.5 | 1871.3 | 1871.3  | 1873.1 |
| gdb 3894 | 1876.5 <sup>a</sup> | 1882.9 | 1882.9  | 1886.1 | 1885.1 | 1885.0  | 1886.4 |
| gdb 3895 | 1852.6 <sup>a</sup> | 1843.1 | 1843.1  | 1843.3 | 1836.0 | 1836.0  | 1835.1 |
| gdb 3896 | 1852.0 <sup>a</sup> | 1846.3 | 1846.3  | 1851.2 | 1846.0 | 1845.9  | 1848.2 |
| gdb 3897 | 1853.7 <sup>a</sup> | 1852.2 | 1852.2  | 1852.6 | 1847.5 | 1847.5  | 1845.9 |

... continued on next page ...



Table S73: ... continued from previous page ...

| Species  | Ref.                | OM2    | OM2-D3T | ODM2   | OM3    | OM3-D3T | ODM3   |
|----------|---------------------|--------|---------|--------|--------|---------|--------|
| gdb 3898 | 1884.3 <sup>a</sup> | 1872.5 | 1872.5  | 1874.6 | 1871.9 | 1871.9  | 1875.6 |
| gdb 3899 | 1870.9 <sup>a</sup> | 1868.1 | 1868.1  | 1866.9 | 1865.5 | 1865.5  | 1863.8 |
| gdb 3900 | 1868.8 <sup>a</sup> | 1859.7 | 1859.7  | 1861.6 | 1861.6 | 1861.6  | 1863.6 |
| gdb 3901 | 1873.8 <sup>a</sup> | 1873.4 | 1873.3  | 1875.1 | 1876.2 | 1876.2  | 1877.4 |
| gdb 3902 | 1871.9 <sup>a</sup> | 1872.5 | 1872.5  | 1874.9 | 1870.2 | 1870.2  | 1873.1 |
| gdb 3903 | 1872.5 <sup>a</sup> | 1874.3 | 1874.3  | 1876.9 | 1872.1 | 1872.1  | 1874.7 |
| gdb 3904 | 1875.6 <sup>a</sup> | 1877.1 | 1877.1  | 1879.7 | 1874.9 | 1874.9  | 1877.2 |
| gdb 3905 | 1877.5 <sup>a</sup> | 1886.2 | 1886.2  | 1888.8 | 1886.3 | 1886.2  | 1888.0 |
| gdb 3906 | 1877.6 <sup>a</sup> | 1881.3 | 1881.3  | 1883.5 | 1879.5 | 1879.5  | 1881.0 |
| gdb 3907 | 1875.5 <sup>a</sup> | 1877.8 | 1877.8  | 1879.9 | 1876.5 | 1876.5  | 1878.8 |
| gdb 3908 | 1882.5 <sup>a</sup> | 1884.4 | 1884.4  | 1886.9 | 1882.7 | 1882.7  | 1883.9 |
| gdb 3909 | 1882.4 <sup>a</sup> | 1890.6 | 1890.6  | 1893.4 | 1891.4 | 1891.4  | 1891.9 |
| gdb 3910 | 1877.1 <sup>a</sup> | 1878.9 | 1878.9  | 1881.7 | 1872.8 | 1872.8  | 1876.4 |
| gdb 3911 | 1882.9 <sup>a</sup> | 1882.7 | 1882.7  | 1885.1 | 1880.0 | 1880.0  | 1882.1 |
| gdb 3912 | 1878.6 <sup>a</sup> | 1879.2 | 1879.2  | 1881.5 | 1876.4 | 1876.4  | 1879.1 |
| gdb 3913 | 1879.7 <sup>a</sup> | 1881.2 | 1881.2  | 1883.8 | 1880.0 | 1879.9  | 1881.8 |
| gdb 3914 | 1882.1 <sup>a</sup> | 1884.2 | 1884.2  | 1886.7 | 1882.7 | 1882.7  | 1884.4 |
| gdb 3915 | 1898.5 <sup>a</sup> | 1887.8 | 1887.8  | 1889.4 | 1885.9 | 1885.9  | 1888.4 |
| gdb 3916 | 1885.7 <sup>a</sup> | 1893.0 | 1893.0  | 1895.7 | 1894.2 | 1894.2  | 1895.5 |
| gdb 3917 | 1816.5 <sup>a</sup> | 1802.8 | 1802.8  | 1805.8 | 1800.3 | 1800.3  | 1800.1 |
| gdb 3918 | 1811.5 <sup>a</sup> | 1783.4 | 1783.4  | 1788.5 | 1784.7 | 1784.7  | 1787.7 |
| gdb 3919 | 1822.9 <sup>a</sup> | 1802.3 | 1802.3  | 1807.1 | 1805.3 | 1805.3  | 1807.2 |
| gdb 3920 | 1798.2 <sup>a</sup> | 1783.1 | 1783.1  | 1785.7 | 1782.5 | 1782.4  | 1782.7 |
| gdb 3921 | 1803.3 <sup>a</sup> | 1786.0 | 1786.0  | 1788.9 | 1786.0 | 1786.0  | 1785.5 |
| gdb 3922 | 1807.6 <sup>a</sup> | 1784.1 | 1784.1  | 1789.2 | 1785.1 | 1785.0  | 1787.7 |
| gdb 3923 | 1816.4 <sup>a</sup> | 1802.4 | 1802.4  | 1807.4 | 1804.6 | 1804.5  | 1806.2 |
| gdb 3924 | 1841.8 <sup>a</sup> | 1825.9 | 1825.9  | 1830.5 | 1822.2 | 1822.2  | 1825.7 |
| gdb 3925 | 1851.9 <sup>a</sup> | 1842.2 | 1842.2  | 1847.1 | 1840.7 | 1840.7  | 1843.8 |
| gdb 3926 | 1850.7 <sup>a</sup> | 1841.7 | 1841.7  | 1844.8 | 1839.8 | 1839.8  | 1841.0 |
| gdb 3927 | 1812.9 <sup>a</sup> | 1803.0 | 1803.0  | 1805.8 | 1799.9 | 1799.9  | 1799.4 |
| gdb 3928 | 1815.9 <sup>a</sup> | 1804.2 | 1804.2  | 1806.9 | 1801.0 | 1801.0  | 1800.0 |
| gdb 3929 | 1808.3 <sup>a</sup> | 1786.0 | 1786.0  | 1791.8 | 1786.5 | 1786.5  | 1789.5 |
| gdb 3930 | 1817.4 <sup>a</sup> | 1798.5 | 1798.5  | 1806.0 | 1802.1 | 1802.1  | 1805.0 |
| gdb 3931 | 1840.4 <sup>a</sup> | 1828.0 | 1828.0  | 1831.7 | 1823.6 | 1823.6  | 1827.0 |
| gdb 3932 | 1846.4 <sup>a</sup> | 1840.8 | 1840.8  | 1845.5 | 1839.1 | 1839.1  | 1842.5 |
| gdb 3933 | 1848.7 <sup>a</sup> | 1843.3 | 1843.3  | 1847.1 | 1841.3 | 1841.3  | 1844.0 |
| gdb 3934 | 1858.0 <sup>a</sup> | 1851.8 | 1851.8  | 1854.1 | 1848.0 | 1848.0  | 1848.8 |
| gdb 3935 | 1851.7 <sup>a</sup> | 1852.3 | 1852.2  | 1850.0 | 1841.9 | 1841.9  | 1845.6 |
| gdb 3936 | 1858.5 <sup>a</sup> | 1851.3 | 1851.3  | 1850.0 | 1844.4 | 1844.4  | 1842.9 |
| gdb 3937 | 1855.9 <sup>a</sup> | 1841.9 | 1841.9  | 1844.5 | 1839.9 | 1839.9  | 1843.1 |
| gdb 3938 | 1851.6 <sup>a</sup> | 1838.0 | 1838.0  | 1840.7 | 1836.6 | 1836.6  | 1839.3 |
| gdb 3939 | 1861.7 <sup>a</sup> | 1856.6 | 1856.5  | 1860.2 | 1856.6 | 1856.5  | 1858.9 |
| gdb 3940 | 1866.2 <sup>a</sup> | 1860.9 | 1860.9  | 1864.0 | 1860.2 | 1860.2  | 1862.4 |
| gdb 3941 | 1862.2 <sup>a</sup> | 1857.7 | 1857.7  | 1859.9 | 1857.3 | 1857.3  | 1858.8 |
| gdb 3942 | 1871.7 <sup>a</sup> | 1862.5 | 1862.5  | 1862.0 | 1859.2 | 1859.1  | 1855.8 |
| gdb 3943 | 1850.9 <sup>a</sup> | 1838.0 | 1838.0  | 1840.4 | 1836.5 | 1836.5  | 1839.6 |
| gdb 3944 | 1854.7 <sup>a</sup> | 1855.4 | 1855.4  | 1854.9 | 1846.7 | 1846.7  | 1850.5 |
| gdb 3945 | 1860.4 <sup>a</sup> | 1848.3 | 1848.3  | 1850.3 | 1849.6 | 1849.5  | 1851.1 |
| gdb 3946 | 1868.6 <sup>a</sup> | 1861.6 | 1861.6  | 1860.4 | 1858.2 | 1858.1  | 1855.4 |
| gdb 3947 | 1830.4 <sup>a</sup> | 1815.0 | 1815.0  | 1819.0 | 1812.5 | 1812.5  | 1816.6 |
| gdb 3948 | 1833.8 <sup>a</sup> | 1817.9 | 1817.9  | 1821.9 | 1815.4 | 1815.4  | 1819.4 |
| gdb 3949 | 1838.9 <sup>a</sup> | 1833.4 | 1833.4  | 1837.3 | 1832.3 | 1832.3  | 1835.6 |
| gdb 3950 | 1835.9 <sup>a</sup> | 1830.7 | 1830.7  | 1834.5 | 1829.4 | 1829.4  | 1832.7 |
| gdb 3951 | 1845.2 <sup>a</sup> | 1832.4 | 1832.4  | 1834.2 | 1825.4 | 1825.4  | 1827.1 |
| gdb 3952 | 1836.1 <sup>a</sup> | 1824.7 | 1824.7  | 1828.7 | 1820.4 | 1820.4  | 1823.9 |
| gdb 3953 | 1849.9 <sup>a</sup> | 1836.4 | 1836.4  | 1840.9 | 1834.9 | 1834.9  | 1838.4 |
| gdb 3954 | 1856.8 <sup>a</sup> | 1850.5 | 1850.5  | 1854.1 | 1846.5 | 1846.5  | 1847.8 |
| gdb 3955 | 1850.4 <sup>a</sup> | 1837.4 | 1837.4  | 1841.2 | 1835.6 | 1835.5  | 1838.6 |
| gdb 3956 | 1849.6 <sup>a</sup> | 1839.3 | 1839.3  | 1844.1 | 1834.6 | 1834.6  | 1838.5 |
| gdb 3957 | 1852.9 <sup>a</sup> | 1842.3 | 1842.3  | 1846.9 | 1837.7 | 1837.7  | 1841.2 |
| gdb 3958 | 1850.7 <sup>a</sup> | 1841.1 | 1841.1  | 1845.1 | 1836.1 | 1836.1  | 1839.6 |
| gdb 3959 | 1854.3 <sup>a</sup> | 1852.6 | 1852.6  | 1857.1 | 1850.1 | 1850.1  | 1853.1 |
| gdb 3960 | 1852.4 <sup>a</sup> | 1851.9 | 1851.9  | 1855.8 | 1849.3 | 1849.3  | 1852.3 |
| gdb 3961 | 1854.4 <sup>a</sup> | 1852.4 | 1852.4  | 1857.0 | 1849.8 | 1849.8  | 1853.0 |
| gdb 3962 | 1867.5 <sup>a</sup> | 1869.8 | 1869.7  | 1872.8 | 1868.0 | 1868.0  | 1870.2 |

... continued on next page ...

Table S73: ... continued from previous page ...

| Species  | Ref.                | OM2    | OM2-D3T | ODM2   | OM3    | OM3-D3T | ODM3   |
|----------|---------------------|--------|---------|--------|--------|---------|--------|
| gdb 3963 | 1893.8 <sup>a</sup> | 1900.2 | 1900.2  | 1902.1 | 1898.8 | 1898.8  | 1900.5 |
| gdb 3964 | 1868.1 <sup>a</sup> | 1870.1 | 1870.1  | 1873.3 | 1867.8 | 1867.8  | 1870.6 |
| gdb 3965 | 1876.8 <sup>a</sup> | 1881.2 | 1881.2  | 1886.6 | 1881.9 | 1881.9  | 1884.0 |
| gdb 3966 | 1876.4 <sup>a</sup> | 1881.8 | 1881.7  | 1885.5 | 1882.5 | 1882.4  | 1883.5 |
| gdb 3967 | 1872.0 <sup>a</sup> | 1874.5 | 1874.5  | 1877.5 | 1871.2 | 1871.2  | 1873.6 |
| gdb 3968 | 1878.0 <sup>a</sup> | 1883.2 | 1883.2  | 1886.2 | 1883.2 | 1883.2  | 1884.0 |
| gdb 3969 | 1877.0 <sup>a</sup> | 1881.1 | 1881.1  | 1885.2 | 1879.0 | 1878.9  | 1882.1 |
| gdb 3970 | 1875.0 <sup>a</sup> | 1878.2 | 1878.2  | 1881.4 | 1876.0 | 1876.0  | 1879.2 |
| gdb 3971 | 1886.4 <sup>a</sup> | 1892.1 | 1892.1  | 1895.0 | 1892.9 | 1892.9  | 1894.5 |
| gdb 3972 | 1886.2 <sup>a</sup> | 1892.9 | 1892.9  | 1896.2 | 1893.9 | 1893.8  | 1895.4 |
| gdb 3973 | 1903.0 <sup>a</sup> | 1890.6 | 1890.6  | 1892.6 | 1888.6 | 1888.6  | 1891.3 |
| gdb 3974 | 1878.8 <sup>a</sup> | 1879.5 | 1879.4  | 1881.9 | 1877.9 | 1877.9  | 1880.2 |
| gdb 3975 | 1881.8 <sup>a</sup> | 1889.8 | 1889.8  | 1894.0 | 1891.1 | 1891.1  | 1893.1 |
| gdb 3976 | 1881.7 <sup>a</sup> | 1887.3 | 1887.2  | 1889.9 | 1887.9 | 1887.9  | 1889.1 |
| gdb 3977 | 1880.3 <sup>a</sup> | 1879.8 | 1879.8  | 1882.8 | 1878.5 | 1878.5  | 1881.2 |
| gdb 3978 | 1866.8 <sup>a</sup> | 1863.7 | 1863.7  | 1865.9 | 1861.6 | 1861.6  | 1863.4 |
| gdb 3979 | 1877.8 <sup>a</sup> | 1881.6 | 1881.6  | 1886.8 | 1882.0 | 1882.0  | 1883.8 |
| gdb 3980 | 1889.2 <sup>a</sup> | 1892.7 | 1892.7  | 1894.5 | 1892.9 | 1892.8  | 1894.9 |
| gdb 3981 | 1896.9 <sup>a</sup> | 1900.4 | 1900.4  | 1901.5 | 1903.1 | 1903.1  | 1903.5 |
| gdb 3982 | 1842.9 <sup>a</sup> | 1828.1 | 1828.1  | 1827.6 | 1823.3 | 1823.3  | 1821.8 |
| gdb 3983 | 1850.0 <sup>a</sup> | 1843.4 | 1843.4  | 1842.9 | 1839.9 | 1839.9  | 1837.4 |
| gdb 3984 | 1878.8 <sup>a</sup> | 1876.5 | 1876.4  | 1878.2 | 1878.3 | 1878.3  | 1879.2 |
| gdb 3985 | 1879.5 <sup>a</sup> | 1875.0 | 1875.0  | 1878.3 | 1876.6 | 1876.6  | 1878.0 |
| gdb 3986 | 1869.1 <sup>a</sup> | 1859.9 | 1859.9  | 1861.1 | 1860.4 | 1860.4  | 1862.0 |
| gdb 3987 | 1870.5 <sup>a</sup> | 1872.6 | 1872.6  | 1875.7 | 1871.1 | 1871.0  | 1874.0 |
| gdb 3988 | 1873.7 <sup>a</sup> | 1874.7 | 1874.7  | 1877.6 | 1873.6 | 1873.6  | 1876.7 |
| gdb 3989 | 1875.2 <sup>a</sup> | 1884.0 | 1884.0  | 1887.0 | 1885.2 | 1885.2  | 1887.4 |
| gdb 3990 | 1881.4 <sup>a</sup> | 1870.9 | 1870.8  | 1872.8 | 1870.3 | 1870.2  | 1873.7 |
| gdb 3991 | 1865.2 <sup>a</sup> | 1856.4 | 1856.3  | 1858.6 | 1858.4 | 1858.4  | 1860.8 |
| gdb 3992 | 1871.8 <sup>a</sup> | 1872.2 | 1872.1  | 1875.6 | 1875.7 | 1875.7  | 1877.6 |
| gdb 3993 | 1882.1 <sup>a</sup> | 1890.0 | 1889.9  | 1894.3 | 1891.4 | 1891.4  | 1893.4 |
| gdb 3994 | 1880.2 <sup>a</sup> | 1887.7 | 1887.7  | 1890.3 | 1888.7 | 1888.6  | 1889.8 |
| gdb 3995 | 1877.2 <sup>a</sup> | 1877.5 | 1877.5  | 1880.1 | 1876.3 | 1876.3  | 1878.5 |
| gdb 3996 | 1852.4 <sup>a</sup> | 1850.7 | 1850.7  | 1852.3 | 1846.1 | 1846.1  | 1844.7 |
| gdb 3997 | 1851.5 <sup>a</sup> | 1842.7 | 1842.6  | 1846.1 | 1842.1 | 1842.1  | 1843.8 |
| gdb 3998 | 1849.0 <sup>a</sup> | 1839.4 | 1839.4  | 1839.3 | 1832.1 | 1832.1  | 1831.0 |
| gdb 3999 | 1851.7 <sup>a</sup> | 1851.2 | 1851.2  | 1856.1 | 1853.6 | 1853.5  | 1855.0 |
| gdb 4000 | 1875.4 <sup>a</sup> | 1874.5 | 1874.5  | 1877.6 | 1876.2 | 1876.2  | 1877.6 |
| gdb 4001 | 1874.8 <sup>a</sup> | 1870.1 | 1870.1  | 1872.1 | 1873.0 | 1873.0  | 1873.5 |
| gdb 4002 | 1870.5 <sup>a</sup> | 1860.1 | 1860.1  | 1862.0 | 1860.1 | 1860.0  | 1862.0 |
| gdb 4003 | 1842.9 <sup>a</sup> | 1824.9 | 1824.9  | 1828.3 | 1823.1 | 1823.1  | 1826.0 |
| gdb 4004 | 1841.0 <sup>a</sup> | 1826.6 | 1826.6  | 1829.2 | 1823.7 | 1823.6  | 1826.7 |
| gdb 4005 | 1851.6 <sup>a</sup> | 1841.1 | 1841.1  | 1844.6 | 1840.9 | 1840.9  | 1843.1 |
| gdb 4006 | 1847.6 <sup>a</sup> | 1841.5 | 1841.5  | 1844.2 | 1840.0 | 1840.0  | 1842.2 |
| gdb 4007 | 1881.1 <sup>a</sup> | 1882.8 | 1882.8  | 1886.3 | 1885.1 | 1885.1  | 1885.8 |
| gdb 4008 | 1874.8 <sup>a</sup> | 1867.4 | 1867.4  | 1869.7 | 1868.0 | 1868.0  | 1869.3 |
| gdb 4009 | 1887.3 <sup>a</sup> | 1885.6 | 1885.6  | 1889.7 | 1882.8 | 1882.8  | 1885.7 |
| gdb 4010 | 1889.3 <sup>a</sup> | 1895.3 | 1895.2  | 1899.4 | 1895.0 | 1895.0  | 1896.9 |
| gdb 4011 | 1851.1 <sup>a</sup> | 1845.7 | 1845.7  | 1845.7 | 1838.1 | 1838.1  | 1837.2 |
| gdb 4012 | 1849.8 <sup>a</sup> | 1840.1 | 1840.1  | 1843.6 | 1836.5 | 1836.5  | 1838.8 |
| gdb 4013 | 1854.5 <sup>a</sup> | 1857.6 | 1857.6  | 1859.2 | 1852.8 | 1852.8  | 1851.5 |
| gdb 4014 | 1853.2 <sup>a</sup> | 1849.7 | 1849.7  | 1853.4 | 1848.9 | 1848.9  | 1850.4 |
| gdb 4015 | 1912.1 <sup>a</sup> | 1914.6 | 1914.6  | 1916.3 | 1912.1 | 1912.0  | 1914.9 |
| gdb 4016 | 1893.1 <sup>a</sup> | 1905.9 | 1905.9  | 1908.8 | 1904.3 | 1904.2  | 1906.9 |
| gdb 4017 | 1897.1 <sup>a</sup> | 1901.0 | 1901.0  | 1902.4 | 1900.2 | 1900.2  | 1901.6 |
| gdb 4018 | 1901.9 <sup>a</sup> | 1913.9 | 1913.8  | 1917.1 | 1915.6 | 1915.6  | 1916.8 |
| gdb 4019 | 1874.7 <sup>a</sup> | 1862.8 | 1862.8  | 1866.0 | 1862.7 | 1862.7  | 1864.1 |
| gdb 4020 | 1873.1 <sup>a</sup> | 1865.5 | 1865.5  | 1869.3 | 1865.6 | 1865.6  | 1868.0 |
| gdb 4021 | 1865.1 <sup>a</sup> | 1853.1 | 1853.1  | 1855.8 | 1850.0 | 1850.0  | 1852.8 |
| gdb 4022 | 1880.2 <sup>a</sup> | 1873.9 | 1873.9  | 1877.9 | 1876.9 | 1876.9  | 1878.0 |
| gdb 4023 | 1862.1 <sup>a</sup> | 1850.4 | 1850.4  | 1853.5 | 1847.4 | 1847.4  | 1851.2 |
| gdb 4024 | 1869.5 <sup>a</sup> | 1867.9 | 1867.9  | 1872.0 | 1861.3 | 1861.2  | 1866.8 |
| gdb 4025 | 1871.2 <sup>a</sup> | 1859.9 | 1859.9  | 1863.7 | 1860.1 | 1860.1  | 1862.2 |
| gdb 4026 | 1864.7 <sup>a</sup> | 1852.8 | 1852.8  | 1855.5 | 1846.6 | 1846.6  | 1848.9 |
| gdb 4027 | 1865.7 <sup>a</sup> | 1863.0 | 1863.0  | 1867.1 | 1859.4 | 1859.4  | 1861.1 |

... continued on next page ...

Table S73: ... continued from previous page ...

| Species  | Ref.                | OM2    | OM2-D3T | ODM2   | OM3    | OM3-D3T | ODM3   |
|----------|---------------------|--------|---------|--------|--------|---------|--------|
| gdb 4028 | 1875.5 <sup>a</sup> | 1865.8 | 1865.8  | 1869.2 | 1865.1 | 1865.1  | 1866.3 |
| gdb 4029 | 1873.3 <sup>a</sup> | 1868.6 | 1868.6  | 1872.0 | 1866.7 | 1866.7  | 1868.9 |
| gdb 4030 | 1865.5 <sup>a</sup> | 1854.8 | 1854.8  | 1857.9 | 1851.1 | 1851.1  | 1854.1 |
| gdb 4031 | 1883.3 <sup>a</sup> | 1879.0 | 1879.0  | 1881.9 | 1879.8 | 1879.8  | 1880.1 |
| gdb 4032 | 1841.4 <sup>a</sup> | 1828.2 | 1828.2  | 1831.7 | 1823.8 | 1823.8  | 1826.8 |
| gdb 4033 | 1837.5 <sup>a</sup> | 1825.9 | 1825.9  | 1830.2 | 1821.7 | 1821.7  | 1825.0 |
| gdb 4034 | 1848.2 <sup>a</sup> | 1835.8 | 1835.8  | 1837.7 | 1828.9 | 1828.9  | 1830.1 |
| gdb 4035 | 1847.7 <sup>a</sup> | 1841.3 | 1841.3  | 1845.1 | 1839.4 | 1839.4  | 1842.1 |
| gdb 4036 | 1845.1 <sup>a</sup> | 1840.1 | 1840.1  | 1845.8 | 1838.5 | 1838.5  | 1841.9 |
| gdb 4037 | 1855.9 <sup>a</sup> | 1851.1 | 1851.1  | 1854.6 | 1847.0 | 1847.0  | 1847.8 |
| gdb 4038 | 1871.4 <sup>a</sup> | 1860.9 | 1860.9  | 1864.1 | 1860.5 | 1860.5  | 1862.1 |
| gdb 4039 | 1868.5 <sup>a</sup> | 1856.5 | 1856.5  | 1859.3 | 1857.0 | 1856.9  | 1858.4 |
| gdb 4040 | 1870.1 <sup>a</sup> | 1862.1 | 1862.1  | 1865.4 | 1862.3 | 1862.3  | 1864.7 |
| gdb 4041 | 1862.1 <sup>a</sup> | 1850.8 | 1850.8  | 1853.3 | 1847.6 | 1847.6  | 1850.5 |
| gdb 4042 | 1876.9 <sup>a</sup> | 1871.5 | 1871.5  | 1875.7 | 1874.5 | 1874.5  | 1875.9 |
| gdb 4043 | 1887.0 <sup>a</sup> | 1886.1 | 1886.1  | 1888.8 | 1879.8 | 1879.8  | 1883.1 |
| gdb 4044 | 1883.9 <sup>a</sup> | 1881.7 | 1881.7  | 1885.5 | 1877.6 | 1877.6  | 1881.3 |
| gdb 4045 | 1895.5 <sup>a</sup> | 1893.7 | 1893.7  | 1897.2 | 1892.6 | 1892.6  | 1894.2 |
| gdb 4046 | 1862.2 <sup>a</sup> | 1847.4 | 1847.4  | 1849.5 | 1846.5 | 1846.4  | 1846.7 |
| gdb 4047 | 1870.1 <sup>a</sup> | 1850.1 | 1850.1  | 1855.8 | 1849.3 | 1849.3  | 1852.8 |
| gdb 4048 | 1856.9 <sup>a</sup> | 1842.9 | 1842.9  | 1845.8 | 1838.4 | 1838.4  | 1839.7 |
| gdb 4049 | 1875.8 <sup>a</sup> | 1856.2 | 1856.2  | 1862.4 | 1858.8 | 1858.8  | 1861.4 |
| gdb 4050 | 1839.3 <sup>a</sup> | 1826.9 | 1826.9  | 1828.8 | 1821.4 | 1821.4  | 1822.4 |
| gdb 4051 | 1843.4 <sup>a</sup> | 1826.8 | 1826.8  | 1831.5 | 1821.5 | 1821.4  | 1826.4 |
| gdb 4052 | 1849.3 <sup>a</sup> | 1838.2 | 1838.2  | 1840.8 | 1836.2 | 1836.2  | 1836.0 |
| gdb 4053 | 1859.2 <sup>a</sup> | 1846.0 | 1846.0  | 1848.1 | 1844.4 | 1844.4  | 1844.7 |
| gdb 4054 | 1861.7 <sup>a</sup> | 1847.0 | 1847.0  | 1849.8 | 1845.7 | 1845.7  | 1845.7 |
| gdb 4055 | 1868.2 <sup>a</sup> | 1850.7 | 1850.7  | 1856.4 | 1849.0 | 1849.0  | 1852.4 |
| gdb 4056 | 1854.6 <sup>a</sup> | 1841.2 | 1841.1  | 1844.2 | 1836.2 | 1836.2  | 1837.7 |
| gdb 4057 | 1871.3 <sup>a</sup> | 1855.3 | 1855.3  | 1861.6 | 1857.1 | 1857.1  | 1859.8 |
| gdb 4058 | 1882.5 <sup>a</sup> | 1876.8 | 1876.8  | 1880.3 | 1870.3 | 1870.3  | 1873.0 |
| gdb 4059 | 1882.1 <sup>a</sup> | 1877.0 | 1877.0  | 1881.6 | 1870.7 | 1870.7  | 1874.6 |
| gdb 4060 | 1887.6 <sup>a</sup> | 1881.9 | 1881.9  | 1884.5 | 1878.7 | 1878.7  | 1880.1 |
| gdb 4061 | 1888.2 <sup>a</sup> | 1884.2 | 1884.2  | 1889.1 | 1881.5 | 1881.5  | 1884.2 |
| gdb 4062 | 1851.8 <sup>a</sup> | 1839.3 | 1839.3  | 1842.6 | 1834.8 | 1834.8  | 1836.4 |
| gdb 4063 | 1862.7 <sup>a</sup> | 1848.3 | 1848.3  | 1855.0 | 1842.0 | 1842.0  | 1849.0 |
| gdb 4064 | 1857.9 <sup>a</sup> | 1845.3 | 1845.3  | 1847.1 | 1844.4 | 1844.4  | 1844.2 |
| gdb 4065 | 1855.4 <sup>a</sup> | 1852.6 | 1852.6  | 1854.1 | 1847.6 | 1847.6  | 1846.0 |
| gdb 4066 | 1859.6 <sup>a</sup> | 1845.2 | 1845.2  | 1849.1 | 1845.1 | 1845.1  | 1847.6 |
| gdb 4067 | 1848.9 <sup>a</sup> | 1838.8 | 1838.8  | 1838.8 | 1831.6 | 1831.6  | 1830.7 |
| gdb 4068 | 1861.5 <sup>a</sup> | 1855.2 | 1855.2  | 1859.3 | 1857.5 | 1857.5  | 1859.0 |
| gdb 4069 | 1853.4 <sup>a</sup> | 1853.1 | 1853.1  | 1854.7 | 1847.2 | 1847.2  | 1845.7 |
| gdb 4070 | 1850.8 <sup>a</sup> | 1850.9 | 1850.9  | 1851.6 | 1845.0 | 1845.0  | 1842.9 |
| gdb 4071 | 1863.1 <sup>a</sup> | 1852.9 | 1852.9  | 1856.5 | 1850.3 | 1850.3  | 1851.9 |
| gdb 4072 | 1846.3 <sup>a</sup> | 1839.2 | 1839.2  | 1839.1 | 1831.0 | 1831.0  | 1829.9 |
| gdb 4073 | 1865.1 <sup>a</sup> | 1860.0 | 1860.0  | 1863.8 | 1859.8 | 1859.8  | 1861.0 |
| gdb 4074 | 1870.4 <sup>a</sup> | 1868.2 | 1868.2  | 1868.3 | 1860.6 | 1860.6  | 1859.9 |
| gdb 4075 | 1829.0 <sup>a</sup> | 1821.9 | 1821.9  | 1824.6 | 1818.2 | 1818.2  | 1821.0 |
| gdb 4076 | 1874.1 <sup>a</sup> | 1871.2 | 1871.2  | 1872.3 | 1867.5 | 1867.5  | 1866.0 |
| gdb 4077 | 1869.7 <sup>a</sup> | 1868.1 | 1868.1  | 1871.8 | 1863.7 | 1863.7  | 1867.0 |
| gdb 4078 | 1874.3 <sup>a</sup> | 1868.9 | 1868.9  | 1868.1 | 1861.7 | 1861.7  | 1860.6 |
| gdb 4079 | 1868.9 <sup>a</sup> | 1874.0 | 1874.0  | 1877.9 | 1871.9 | 1871.9  | 1874.4 |
| gdb 4080 | 1878.0 <sup>a</sup> | 1879.9 | 1879.9  | 1880.9 | 1875.6 | 1875.6  | 1874.2 |
| gdb 4081 | 1885.6 <sup>a</sup> | 1888.6 | 1888.6  | 1891.3 | 1884.0 | 1884.0  | 1887.3 |
| gdb 4082 | 1880.3 <sup>a</sup> | 1881.9 | 1881.9  | 1885.5 | 1878.0 | 1878.0  | 1881.8 |
| gdb 4083 | 1889.5 <sup>a</sup> | 1893.2 | 1893.2  | 1895.2 | 1890.7 | 1890.7  | 1892.4 |
| gdb 4084 | 1889.6 <sup>a</sup> | 1891.1 | 1891.1  | 1893.7 | 1889.9 | 1889.9  | 1892.0 |
| gdb 4085 | 1877.6 <sup>a</sup> | 1871.7 | 1871.7  | 1876.5 | 1866.7 | 1866.7  | 1871.1 |
| gdb 4086 | 1885.2 <sup>a</sup> | 1878.4 | 1878.4  | 1882.8 | 1876.3 | 1876.3  | 1879.8 |
| gdb 4087 | 1853.5 <sup>a</sup> | 1844.4 | 1844.4  | 1848.9 | 1839.5 | 1839.5  | 1844.2 |
| gdb 4088 | 1853.4 <sup>a</sup> | 1843.9 | 1843.9  | 1848.5 | 1838.8 | 1838.8  | 1843.3 |
| gdb 4089 | 1854.4 <sup>a</sup> | 1854.0 | 1854.0  | 1858.6 | 1851.3 | 1851.3  | 1855.1 |
| gdb 4090 | 1854.6 <sup>a</sup> | 1854.6 | 1854.6  | 1860.6 | 1852.2 | 1852.2  | 1856.3 |
| gdb 4091 | 1885.8 <sup>a</sup> | 1883.3 | 1883.3  | 1886.1 | 1880.8 | 1880.8  | 1883.5 |
| gdb 4092 | 1888.9 <sup>a</sup> | 1893.9 | 1893.9  | 1896.8 | 1893.6 | 1893.6  | 1895.4 |

... continued on next page ...

Table S73: ... continued from previous page ...

| Species  | Ref.                | OM2    | OM2-D3T | ODM2   | OM3    | OM3-D3T | ODM3   |
|----------|---------------------|--------|---------|--------|--------|---------|--------|
| gdb 4093 | 1894.7 <sup>a</sup> | 1895.7 | 1895.7  | 1899.9 | 1891.6 | 1891.6  | 1894.9 |
| gdb 4094 | 1899.3 <sup>a</sup> | 1899.0 | 1899.0  | 1901.9 | 1898.0 | 1898.0  | 1900.2 |
| gdb 4095 | 1887.9 <sup>a</sup> | 1887.9 | 1887.9  | 1891.0 | 1884.6 | 1884.6  | 1887.0 |
| gdb 4096 | 1892.7 <sup>a</sup> | 1899.5 | 1899.5  | 1903.9 | 1898.9 | 1898.9  | 1900.5 |
| gdb 4097 | 1878.3 <sup>a</sup> | 1876.2 | 1876.2  | 1879.8 | 1870.9 | 1870.9  | 1874.9 |
| gdb 4098 | 1881.1 <sup>a</sup> | 1887.5 | 1887.5  | 1890.5 | 1884.5 | 1884.5  | 1887.6 |
| gdb 4099 | 1886.4 <sup>a</sup> | 1891.8 | 1891.8  | 1895.9 | 1892.5 | 1892.5  | 1894.6 |
| gdb 4100 | 1885.5 <sup>a</sup> | 1892.1 | 1892.1  | 1895.2 | 1892.4 | 1892.4  | 1893.5 |
| gdb 4101 | 1901.0 <sup>a</sup> | 1890.0 | 1890.0  | 1891.8 | 1887.5 | 1887.5  | 1890.1 |
| gdb 4102 | 1883.1 <sup>a</sup> | 1882.6 | 1882.6  | 1885.5 | 1881.3 | 1881.3  | 1884.0 |
| gdb 4103 | 1900.0 <sup>a</sup> | 1908.1 | 1908.1  | 1910.7 | 1907.1 | 1907.1  | 1909.7 |
| gdb 4104 | 1897.2 <sup>a</sup> | 1905.6 | 1905.6  | 1907.9 | 1904.4 | 1904.4  | 1906.5 |
| gdb 4105 | 1921.5 <sup>a</sup> | 1907.8 | 1907.8  | 1909.4 | 1906.9 | 1906.8  | 1909.5 |
| gdb 4106 | 1903.2 <sup>a</sup> | 1910.5 | 1910.5  | 1914.0 | 1913.0 | 1913.0  | 1914.5 |
| gdb 4107 | 1914.0 <sup>a</sup> | 1918.6 | 1918.5  | 1920.4 | 1915.9 | 1915.9  | 1918.8 |
| gdb 4108 | 1914.7 <sup>a</sup> | 1918.4 | 1918.4  | 1920.2 | 1916.0 | 1916.0  | 1918.9 |
| gdb 4109 | 1901.5 <sup>a</sup> | 1907.2 | 1907.2  | 1908.8 | 1906.8 | 1906.8  | 1908.7 |
| gdb 4110 | 1902.4 <sup>a</sup> | 1915.9 | 1915.9  | 1917.6 | 1917.7 | 1917.6  | 1918.5 |
| gdb 4111 | 1870.5 <sup>a</sup> | 1872.6 | 1872.6  | 1875.8 | 1870.3 | 1870.3  | 1872.9 |
| gdb 4112 | 1869.7 <sup>a</sup> | 1868.0 | 1868.0  | 1870.1 | 1865.5 | 1865.5  | 1867.2 |
| gdb 4113 | 1877.2 <sup>a</sup> | 1880.1 | 1880.1  | 1884.2 | 1880.8 | 1880.8  | 1882.3 |
| gdb 4114 | 1888.2 <sup>a</sup> | 1895.1 | 1895.1  | 1898.5 | 1893.4 | 1893.3  | 1896.3 |
| gdb 4115 | 1892.5 <sup>a</sup> | 1893.4 | 1893.4  | 1895.3 | 1891.6 | 1891.6  | 1892.9 |
| gdb 4116 | 1898.5 <sup>a</sup> | 1902.1 | 1902.1  | 1904.3 | 1903.8 | 1903.8  | 1905.0 |
| gdb 4117 | 1896.3 <sup>a</sup> | 1902.0 | 1902.0  | 1904.0 | 1892.1 | 1892.1  | 1896.8 |
| gdb 4118 | 1894.3 <sup>a</sup> | 1899.4 | 1899.4  | 1901.7 | 1890.0 | 1889.9  | 1895.4 |
| gdb 4119 | 1898.5 <sup>a</sup> | 1903.2 | 1903.2  | 1905.8 | 1899.1 | 1899.1  | 1901.8 |
| gdb 4120 | 1895.9 <sup>a</sup> | 1897.5 | 1897.5  | 1899.2 | 1894.7 | 1894.7  | 1896.0 |
| gdb 4121 | 1893.6 <sup>a</sup> | 1901.1 | 1901.1  | 1904.5 | 1898.2 | 1898.2  | 1901.3 |
| gdb 4122 | 1903.0 <sup>a</sup> | 1907.0 | 1907.0  | 1909.1 | 1907.0 | 1907.0  | 1907.8 |
| gdb 4123 | 1880.4 <sup>a</sup> | 1881.2 | 1881.2  | 1885.4 | 1878.1 | 1878.1  | 1880.9 |
| gdb 4124 | 1870.6 <sup>a</sup> | 1873.2 | 1873.2  | 1876.3 | 1871.8 | 1871.8  | 1874.9 |
| gdb 4125 | 1873.7 <sup>a</sup> | 1874.5 | 1874.5  | 1877.4 | 1873.5 | 1873.5  | 1876.8 |
| gdb 4126 | 1875.6 <sup>a</sup> | 1883.4 | 1883.4  | 1887.7 | 1884.6 | 1884.6  | 1887.2 |
| gdb 4127 | 1897.4 <sup>a</sup> | 1893.8 | 1893.8  | 1897.6 | 1895.3 | 1895.3  | 1897.5 |
| gdb 4128 | 1897.5 <sup>a</sup> | 1891.9 | 1891.9  | 1894.9 | 1893.5 | 1893.5  | 1895.1 |
| gdb 4129 | 1890.8 <sup>a</sup> | 1888.3 | 1888.2  | 1888.9 | 1885.3 | 1885.3  | 1885.1 |
| gdb 4130 | 1887.0 <sup>a</sup> | 1884.9 | 1884.9  | 1887.4 | 1883.5 | 1883.5  | 1885.7 |
| gdb 4131 | 1895.7 <sup>a</sup> | 1900.7 | 1900.7  | 1902.4 | 1895.5 | 1895.5  | 1897.2 |
| gdb 4132 | 1893.5 <sup>a</sup> | 1896.9 | 1896.9  | 1900.5 | 1892.4 | 1892.4  | 1895.5 |
| gdb 4133 | 1892.8 <sup>a</sup> | 1901.4 | 1901.4  | 1902.4 | 1890.4 | 1890.4  | 1893.4 |
| gdb 4134 | 1900.3 <sup>a</sup> | 1902.0 | 1902.0  | 1905.5 | 1901.1 | 1901.1  | 1903.2 |
| gdb 4135 | 1885.1 <sup>a</sup> | 1883.3 | 1883.2  | 1884.5 | 1880.1 | 1880.1  | 1880.9 |
| gdb 4136 | 1884.2 <sup>a</sup> | 1881.4 | 1881.4  | 1884.2 | 1879.4 | 1879.3  | 1882.3 |
| gdb 4137 | 1894.2 <sup>a</sup> | 1890.9 | 1890.9  | 1893.7 | 1891.1 | 1891.1  | 1893.1 |
| gdb 4138 | 1845.1 <sup>a</sup> | 1832.3 | 1832.3  | 1834.2 | 1825.5 | 1825.5  | 1827.1 |
| gdb 4139 | 1840.3 <sup>a</sup> | 1827.1 | 1827.1  | 1830.3 | 1822.6 | 1822.6  | 1825.6 |
| gdb 4140 | 1838.8 <sup>a</sup> | 1826.7 | 1826.7  | 1830.2 | 1822.1 | 1822.1  | 1825.3 |
| gdb 4141 | 1850.2 <sup>a</sup> | 1836.6 | 1836.6  | 1841.6 | 1835.2 | 1835.2  | 1838.6 |
| gdb 4142 | 1850.1 <sup>a</sup> | 1836.2 | 1836.2  | 1840.5 | 1834.9 | 1834.9  | 1838.0 |
| gdb 4143 | 1859.0 <sup>a</sup> | 1851.9 | 1851.9  | 1855.3 | 1848.4 | 1848.4  | 1849.3 |
| gdb 4144 | 1884.5 <sup>a</sup> | 1884.2 | 1884.2  | 1885.7 | 1885.5 | 1885.5  | 1885.3 |
| gdb 4145 | 1877.5 <sup>a</sup> | 1876.4 | 1876.3  | 1875.0 | 1871.8 | 1871.8  | 1869.0 |
| gdb 4146 | 1875.5 <sup>a</sup> | 1868.7 | 1868.7  | 1870.3 | 1868.6 | 1868.6  | 1869.5 |
| gdb 4147 | 1847.8 <sup>a</sup> | 1839.6 | 1839.5  | 1835.7 | 1829.9 | 1829.9  | 1824.3 |
| gdb 4148 | 1844.5 <sup>a</sup> | 1829.3 | 1829.3  | 1828.2 | 1824.1 | 1824.0  | 1822.2 |
| gdb 4149 | 1854.4 <sup>a</sup> | 1846.6 | 1846.6  | 1846.8 | 1842.5 | 1842.5  | 1840.0 |
| gdb 4150 | 1853.7 <sup>a</sup> | 1847.7 | 1847.7  | 1847.1 | 1843.1 | 1843.1  | 1839.7 |
| gdb 4151 | 1884.0 <sup>a</sup> | 1872.7 | 1872.7  | 1874.8 | 1871.9 | 1871.9  | 1875.5 |
| gdb 4152 | 1871.3 <sup>a</sup> | 1868.3 | 1868.2  | 1867.3 | 1865.5 | 1865.4  | 1864.0 |
| gdb 4153 | 1866.3 <sup>a</sup> | 1857.8 | 1857.7  | 1859.5 | 1859.3 | 1859.3  | 1861.4 |
| gdb 4154 | 1875.3 <sup>a</sup> | 1874.6 | 1874.6  | 1877.4 | 1877.3 | 1877.3  | 1878.7 |
| gdb 4155 | 1911.5 <sup>a</sup> | 1919.6 | 1919.6  | 1921.3 | 1916.6 | 1916.6  | 1918.0 |
| gdb 4156 | 1928.1 <sup>a</sup> | 1924.4 | 1924.4  | 1926.0 | 1921.2 | 1921.2  | 1924.2 |
| gdb 4157 | 1912.8 <sup>a</sup> | 1918.6 | 1918.6  | 1921.2 | 1916.3 | 1916.3  | 1919.3 |

... continued on next page ...

Table S73: ... continued from previous page ...

| Species  | Ref.                | OM2    | OM2-D3T | ODM2   | OM3    | OM3-D3T | ODM3   |
|----------|---------------------|--------|---------|--------|--------|---------|--------|
| gdb 4158 | 1918.1 <sup>a</sup> | 1923.5 | 1923.5  | 1925.7 | 1924.2 | 1924.2  | 1926.0 |
| gdb 4159 | 1894.0 <sup>a</sup> | 1900.4 | 1900.4  | 1900.4 | 1903.3 | 1895.8  | 1897.5 |
| gdb 4160 | 1891.1 <sup>a</sup> | 1900.7 | 1900.7  | 1901.5 | 1890.5 | 1890.5  | 1893.0 |
| gdb 4161 | 1883.3 <sup>a</sup> | 1879.3 | 1879.3  | 1878.4 | 1870.1 | 1870.1  | 1868.5 |
| gdb 4162 | 1875.9 <sup>a</sup> | 1875.5 | 1875.5  | 1875.3 | 1866.9 | 1866.9  | 1866.6 |
| gdb 4163 | 1888.7 <sup>a</sup> | 1891.6 | 1891.6  | 1893.1 | 1881.9 | 1881.9  | 1884.0 |
| gdb 4164 | 1886.8 <sup>a</sup> | 1886.1 | 1886.1  | 1887.0 | 1880.5 | 1880.5  | 1879.3 |
| gdb 4165 | 1891.9 <sup>a</sup> | 1892.0 | 1892.0  | 1895.4 | 1888.7 | 1888.7  | 1889.7 |
| gdb 4166 | 1861.5 <sup>a</sup> | 1852.6 | 1852.6  | 1850.9 | 1843.7 | 1843.6  | 1840.4 |
| gdb 4167 | 1860.4 <sup>a</sup> | 1850.8 | 1850.8  | 1850.9 | 1843.5 | 1843.5  | 1842.6 |
| gdb 4168 | 1871.3 <sup>a</sup> | 1861.2 | 1861.2  | 1862.8 | 1856.6 | 1856.6  | 1855.6 |
| gdb 4169 | 1862.4 <sup>a</sup> | 1860.3 | 1860.3  | 1862.8 | 1856.9 | 1856.8  | 1856.8 |
| gdb 4170 | 1883.9 <sup>a</sup> | 1881.8 | 1881.8  | 1883.3 | 1879.2 | 1879.1  | 1880.6 |
| gdb 4171 | 1881.0 <sup>a</sup> | 1879.4 | 1879.4  | 1882.4 | 1878.1 | 1878.1  | 1881.3 |
| gdb 4172 | 1889.2 <sup>a</sup> | 1886.7 | 1886.7  | 1890.9 | 1888.3 | 1888.2  | 1891.2 |
| gdb 4173 | 1893.5 <sup>a</sup> | 1899.0 | 1899.0  | 1900.7 | 1894.6 | 1894.5  | 1895.9 |
| gdb 4174 | 1891.3 <sup>a</sup> | 1900.9 | 1900.9  | 1901.7 | 1890.6 | 1890.6  | 1893.0 |
| gdb 4175 | 1901.8 <sup>a</sup> | 1908.5 | 1908.5  | 1910.9 | 1899.3 | 1899.3  | 1903.1 |
| gdb 4176 | 1903.8 <sup>a</sup> | 1907.8 | 1907.8  | 1911.7 | 1904.9 | 1904.9  | 1907.2 |
| gdb 4177 | 1928.2 <sup>a</sup> | 1924.5 | 1924.5  | 1926.2 | 1921.2 | 1921.2  | 1924.1 |
| gdb 4178 | 1912.0 <sup>a</sup> | 1919.8 | 1919.8  | 1921.5 | 1917.0 | 1917.0  | 1918.3 |
| gdb 4179 | 1909.7 <sup>a</sup> | 1914.6 | 1914.6  | 1916.5 | 1912.3 | 1912.3  | 1914.5 |
| gdb 4180 | 1917.7 <sup>a</sup> | 1923.4 | 1923.4  | 1925.2 | 1923.9 | 1923.9  | 1925.4 |
| gdb 4181 | 1900.5 <sup>a</sup> | 1907.7 | 1907.7  | 1909.8 | 1898.1 | 1898.1  | 1901.9 |
| gdb 4182 | 1901.5 <sup>a</sup> | 1907.7 | 1907.7  | 1911.6 | 1904.7 | 1904.7  | 1907.1 |
| gdb 4183 | 1902.1 <sup>a</sup> | 1907.9 | 1907.9  | 1908.4 | 1909.3 | 1909.3  | 1908.5 |
| gdb 4184 | 1903.7 <sup>a</sup> | 1904.7 | 1904.7  | 1906.0 | 1907.9 | 1907.9  | 1907.4 |
| gdb 4185 | 1902.1 <sup>a</sup> | 1902.1 | 1902.1  | 1899.7 | 1898.2 | 1898.2  | 1894.8 |
| gdb 4186 | 1895.4 <sup>a</sup> | 1899.7 | 1899.7  | 1901.5 | 1898.9 | 1898.9  | 1900.5 |
| gdb 4187 | 1891.8 <sup>a</sup> | 1887.3 | 1887.3  | 1887.1 | 1882.3 | 1882.3  | 1880.2 |
| gdb 4188 | 1878.2 <sup>a</sup> | 1877.7 | 1877.7  | 1879.8 | 1876.8 | 1876.8  | 1879.2 |
| gdb 4189 | 1886.6 <sup>a</sup> | 1885.7 | 1885.7  | 1888.8 | 1887.5 | 1887.5  | 1888.2 |
| gdb 4190 | 1891.5 <sup>a</sup> | 1894.2 | 1894.2  | 1895.9 | 1893.6 | 1893.6  | 1895.6 |
| gdb 4191 | 1891.6 <sup>a</sup> | 1895.9 | 1895.9  | 1897.5 | 1895.3 | 1895.3  | 1896.8 |
| gdb 4192 | 1896.1 <sup>a</sup> | 1894.3 | 1894.3  | 1892.2 | 1890.7 | 1890.7  | 1888.2 |
| gdb 4193 | 1898.9 <sup>a</sup> | 1901.7 | 1901.7  | 1902.4 | 1903.9 | 1903.9  | 1904.2 |
| gdb 4194 | 1895.3 <sup>a</sup> | 1900.7 | 1900.7  | 1901.6 | 1899.7 | 1899.7  | 1901.3 |
| gdb 4195 | 1909.5 <sup>a</sup> | 1908.4 | 1908.3  | 1908.3 | 1905.9 | 1905.9  | 1907.7 |
| gdb 4196 | 1899.0 <sup>a</sup> | 1900.1 | 1900.1  | 1898.1 | 1896.3 | 1896.2  | 1893.4 |
| gdb 4197 | 1902.8 <sup>a</sup> | 1907.6 | 1907.6  | 1909.4 | 1909.6 | 1909.5  | 1909.5 |
| gdb 4198 | 1885.0 <sup>a</sup> | 1884.8 | 1884.8  | 1884.5 | 1880.5 | 1880.5  | 1878.5 |
| gdb 4199 | 1870.9 <sup>a</sup> | 1864.7 | 1864.6  | 1860.1 | 1855.2 | 1855.1  | 1849.4 |
| gdb 4200 | 1866.4 <sup>a</sup> | 1865.4 | 1865.3  | 1864.7 | 1858.6 | 1858.6  | 1857.0 |
| gdb 4201 | 1872.1 <sup>a</sup> | 1869.9 | 1869.9  | 1868.1 | 1865.5 | 1865.5  | 1862.1 |
| gdb 4202 | 1875.5 <sup>a</sup> | 1875.4 | 1875.4  | 1874.9 | 1871.2 | 1871.2  | 1868.1 |
| gdb 4203 | 1891.6 <sup>a</sup> | 1892.5 | 1892.5  | 1890.7 | 1889.7 | 1889.4  | 1887.5 |
| gdb 4204 | 1885.5 <sup>a</sup> | 1892.3 | 1892.3  | 1894.1 | 1891.7 | 1891.7  | 1894.3 |
| gdb 4205 | 1895.0 <sup>a</sup> | 1900.4 | 1900.4  | 1903.0 | 1901.6 | 1901.6  | 1902.4 |
| gdb 4206 | 1875.8 <sup>a</sup> | 1867.6 | 1867.6  | 1863.4 | 1858.4 | 1858.3  | 1853.0 |
| gdb 4207 | 1867.9 <sup>a</sup> | 1862.1 | 1862.1  | 1861.0 | 1855.5 | 1855.5  | 1854.5 |
| gdb 4208 | 1879.1 <sup>a</sup> | 1874.2 | 1874.2  | 1873.6 | 1870.5 | 1870.4  | 1867.3 |
| gdb 4209 | 1875.4 <sup>a</sup> | 1873.8 | 1873.8  | 1872.4 | 1870.1 | 1870.1  | 1867.2 |
| gdb 4210 | 1884.2 <sup>a</sup> | 1884.1 | 1884.1  | 1882.3 | 1879.1 | 1879.1  | 1876.7 |
| gdb 4211 | 1905.2 <sup>a</sup> | 1902.5 | 1902.5  | 1903.1 | 1900.3 | 1900.2  | 1902.4 |
| gdb 4212 | 1898.2 <sup>a</sup> | 1900.5 | 1900.5  | 1898.3 | 1897.2 | 1897.2  | 1894.5 |
| gdb 4213 | 1892.8 <sup>a</sup> | 1898.6 | 1898.6  | 1899.0 | 1897.9 | 1897.9  | 1899.1 |
| gdb 4214 | 1902.2 <sup>a</sup> | 1906.2 | 1906.2  | 1907.0 | 1907.9 | 1907.9  | 1907.2 |
| gdb 4215 | 1880.8 <sup>a</sup> | 1876.2 | 1876.2  | 1876.2 | 1872.8 | 1872.8  | 1870.9 |
| gdb 4216 | 1876.0 <sup>a</sup> | 1864.9 | 1864.9  | 1868.1 | 1865.0 | 1864.9  | 1866.5 |
| gdb 4217 | 1873.3 <sup>a</sup> | 1869.2 | 1869.2  | 1872.8 | 1868.5 | 1868.5  | 1870.9 |
| gdb 4218 | 1878.5 <sup>a</sup> | 1873.5 | 1873.5  | 1877.5 | 1876.2 | 1876.2  | 1877.4 |
| gdb 4219 | 1853.3 <sup>a</sup> | 1847.4 | 1847.4  | 1847.7 | 1840.1 | 1840.1  | 1839.5 |
| gdb 4220 | 1854.1 <sup>a</sup> | 1857.1 | 1857.1  | 1857.4 | 1852.1 | 1852.0  | 1850.3 |
| gdb 4221 | 1852.5 <sup>a</sup> | 1849.8 | 1849.8  | 1854.8 | 1849.3 | 1849.3  | 1851.7 |
| gdb 4222 | 1887.1 <sup>a</sup> | 1885.9 | 1885.9  | 1888.5 | 1879.9 | 1879.8  | 1883.2 |

... continued on next page ...

Table S73: ... continued from previous page ...

| Species  | Ref.                | OM2    | OM2-D3T | ODM2   | OM3    | OM3-D3T | ODM3   |
|----------|---------------------|--------|---------|--------|--------|---------|--------|
| gdb 4223 | 1892.5 <sup>a</sup> | 1893.5 | 1893.5  | 1896.1 | 1886.4 | 1886.4  | 1890.6 |
| gdb 4224 | 1894.2 <sup>a</sup> | 1893.8 | 1893.8  | 1897.2 | 1892.5 | 1892.4  | 1894.3 |
| gdb 4225 | 1873.1 <sup>a</sup> | 1863.3 | 1863.3  | 1866.2 | 1863.1 | 1863.1  | 1864.7 |
| gdb 4226 | 1868.2 <sup>a</sup> | 1856.8 | 1856.8  | 1859.6 | 1857.4 | 1857.4  | 1858.9 |
| gdb 4227 | 1870.8 <sup>a</sup> | 1867.1 | 1867.0  | 1870.5 | 1866.2 | 1866.2  | 1868.4 |
| gdb 4228 | 1876.9 <sup>a</sup> | 1872.5 | 1872.5  | 1876.6 | 1875.3 | 1875.3  | 1876.5 |
| gdb 4229 | 1873.1 <sup>a</sup> | 1863.6 | 1863.6  | 1867.1 | 1863.0 | 1862.9  | 1864.9 |
| gdb 4230 | 1868.2 <sup>a</sup> | 1857.6 | 1857.6  | 1860.7 | 1857.7 | 1857.7  | 1859.5 |
| gdb 4231 | 1871.1 <sup>a</sup> | 1868.3 | 1868.3  | 1872.1 | 1866.9 | 1866.9  | 1869.3 |
| gdb 4232 | 1877.5 <sup>a</sup> | 1873.6 | 1873.6  | 1876.7 | 1875.7 | 1875.7  | 1876.6 |
| gdb 4233 | 1870.1 <sup>a</sup> | 1862.3 | 1862.3  | 1866.0 | 1856.0 | 1856.0  | 1859.0 |
| gdb 4234 | 1867.0 <sup>a</sup> | 1864.1 | 1864.1  | 1868.1 | 1857.7 | 1857.6  | 1861.5 |
| gdb 4235 | 1874.4 <sup>a</sup> | 1870.4 | 1870.4  | 1874.0 | 1867.0 | 1867.0  | 1869.3 |
| gdb 4236 | 1877.7 <sup>a</sup> | 1873.7 | 1873.7  | 1878.3 | 1870.5 | 1870.4  | 1873.2 |
| gdb 4237 | 1848.9 <sup>a</sup> | 1837.7 | 1837.7  | 1839.0 | 1831.2 | 1831.2  | 1832.0 |
| gdb 4238 | 1860.8 <sup>a</sup> | 1854.4 | 1854.4  | 1857.6 | 1850.2 | 1850.2  | 1850.7 |
| gdb 4239 | 1848.1 <sup>a</sup> | 1840.9 | 1840.9  | 1847.0 | 1839.8 | 1839.8  | 1843.3 |
| gdb 4240 | 1873.8 <sup>a</sup> | 1874.3 | 1874.3  | 1878.9 | 1868.5 | 1868.5  | 1873.0 |
| gdb 4241 | 1877.6 <sup>a</sup> | 1879.5 | 1879.5  | 1884.1 | 1876.7 | 1876.7  | 1879.2 |
| gdb 4242 | 1877.7 <sup>a</sup> | 1879.1 | 1879.1  | 1882.8 | 1876.7 | 1876.7  | 1879.4 |
| gdb 4243 | 1881.3 <sup>a</sup> | 1877.2 | 1877.2  | 1880.1 | 1871.1 | 1871.0  | 1873.7 |
| gdb 4244 | 1887.5 <sup>a</sup> | 1884.4 | 1884.4  | 1887.7 | 1875.7 | 1875.7  | 1880.3 |
| gdb 4245 | 1885.4 <sup>a</sup> | 1880.8 | 1880.8  | 1883.2 | 1877.5 | 1877.5  | 1878.9 |
| gdb 4246 | 1887.9 <sup>a</sup> | 1884.1 | 1884.1  | 1889.1 | 1881.4 | 1881.4  | 1884.4 |
| gdb 4247 | 1876.9 <sup>a</sup> | 1871.0 | 1871.0  | 1870.5 | 1864.2 | 1864.2  | 1863.4 |
| gdb 4248 | 1877.7 <sup>a</sup> | 1879.5 | 1879.5  | 1879.1 | 1874.9 | 1874.9  | 1873.0 |
| gdb 4249 | 1871.6 <sup>a</sup> | 1878.0 | 1878.0  | 1881.9 | 1876.2 | 1876.2  | 1878.8 |
| gdb 4250 | 1849.5 <sup>a</sup> | 1838.9 | 1838.9  | 1843.7 | 1834.4 | 1834.4  | 1838.2 |
| gdb 4251 | 1850.2 <sup>a</sup> | 1840.9 | 1840.9  | 1844.9 | 1835.8 | 1835.7  | 1839.1 |
| gdb 4252 | 1849.0 <sup>a</sup> | 1839.8 | 1839.8  | 1843.2 | 1835.2 | 1835.2  | 1838.8 |
| gdb 4253 | 1854.7 <sup>a</sup> | 1851.4 | 1851.4  | 1855.9 | 1848.8 | 1848.8  | 1851.6 |
| gdb 4254 | 1851.1 <sup>a</sup> | 1850.7 | 1850.7  | 1855.8 | 1848.6 | 1848.6  | 1851.8 |
| gdb 4255 | 1853.6 <sup>a</sup> | 1852.0 | 1852.0  | 1857.6 | 1850.2 | 1850.2  | 1853.6 |
| gdb 4256 | 1890.0 <sup>a</sup> | 1889.0 | 1889.0  | 1892.2 | 1885.7 | 1885.7  | 1887.9 |
| gdb 4257 | 1893.6 <sup>a</sup> | 1899.1 | 1899.1  | 1903.3 | 1898.3 | 1898.3  | 1899.7 |
| gdb 4258 | 1902.4 <sup>a</sup> | 1910.8 | 1910.8  | 1914.1 | 1902.5 | 1902.4  | 1907.2 |
| gdb 4259 | 1911.7 <sup>a</sup> | 1914.6 | 1914.6  | 1916.3 | 1912.0 | 1912.0  | 1914.9 |
| gdb 4260 | 1893.2 <sup>a</sup> | 1906.9 | 1906.9  | 1909.7 | 1905.4 | 1905.4  | 1908.1 |
| gdb 4261 | 1901.2 <sup>a</sup> | 1904.6 | 1904.6  | 1906.3 | 1904.0 | 1904.0  | 1905.7 |
| gdb 4262 | 1900.0 <sup>a</sup> | 1913.3 | 1913.3  | 1916.4 | 1915.0 | 1914.9  | 1916.2 |
| gdb 4263 | 1870.9 <sup>a</sup> | 1874.8 | 1874.8  | 1878.9 | 1872.6 | 1872.6  | 1875.0 |
| gdb 4264 | 1872.6 <sup>a</sup> | 1874.1 | 1874.1  | 1876.6 | 1871.6 | 1871.6  | 1874.1 |
| gdb 4265 | 1871.3 <sup>a</sup> | 1872.5 | 1872.5  | 1874.8 | 1870.1 | 1870.1  | 1873.0 |
| gdb 4266 | 1874.5 <sup>a</sup> | 1875.0 | 1875.0  | 1877.4 | 1872.7 | 1872.7  | 1875.5 |
| gdb 4267 | 1877.5 <sup>a</sup> | 1885.9 | 1885.8  | 1888.4 | 1885.6 | 1885.6  | 1887.3 |
| gdb 4268 | 1902.2 <sup>a</sup> | 1908.5 | 1908.5  | 1910.9 | 1906.3 | 1906.3  | 1908.9 |
| gdb 4269 | 1902.4 <sup>a</sup> | 1909.2 | 1909.1  | 1911.5 | 1907.1 | 1907.0  | 1909.7 |
| gdb 4270 | 1905.2 <sup>a</sup> | 1911.9 | 1911.9  | 1914.0 | 1909.8 | 1909.8  | 1912.1 |
| gdb 4271 | 1911.0 <sup>a</sup> | 1918.1 | 1918.1  | 1921.1 | 1919.1 | 1919.1  | 1920.8 |
| gdb 4272 | 1889.8 <sup>a</sup> | 1898.2 | 1898.2  | 1901.3 | 1891.0 | 1891.0  | 1895.2 |
| gdb 4273 | 1895.4 <sup>a</sup> | 1904.7 | 1904.7  | 1907.2 | 1895.1 | 1895.1  | 1900.3 |
| gdb 4274 | 1898.6 <sup>a</sup> | 1904.8 | 1904.8  | 1908.5 | 1901.5 | 1901.5  | 1904.5 |
| gdb 4275 | 1898.0 <sup>a</sup> | 1905.1 | 1905.1  | 1908.7 | 1901.5 | 1901.5  | 1904.8 |
| gdb 4276 | 1868.8 <sup>a</sup> | 1868.0 | 1868.0  | 1870.9 | 1866.2 | 1866.2  | 1867.8 |
| gdb 4277 | 1891.6 <sup>a</sup> | 1897.5 | 1897.5  | 1899.1 | 1896.0 | 1895.9  | 1897.6 |
| gdb 4278 | 1896.6 <sup>a</sup> | 1901.4 | 1901.4  | 1903.3 | 1900.1 | 1900.0  | 1902.0 |
| gdb 4279 | 1894.5 <sup>a</sup> | 1909.2 | 1909.1  | 1912.2 | 1907.0 | 1907.0  | 1909.5 |
| gdb 4280 | 1901.0 <sup>a</sup> | 1911.8 | 1911.8  | 1913.6 | 1912.9 | 1912.8  | 1913.1 |
| gdb 4281 | 1877.0 <sup>a</sup> | 1875.9 | 1875.9  | 1878.8 | 1870.1 | 1870.1  | 1874.2 |
| gdb 4282 | 1882.8 <sup>a</sup> | 1881.1 | 1881.1  | 1883.4 | 1878.8 | 1878.8  | 1881.3 |
| gdb 4283 | 1883.2 <sup>a</sup> | 1882.7 | 1882.7  | 1886.7 | 1880.6 | 1880.6  | 1883.7 |
| gdb 4284 | 1885.2 <sup>a</sup> | 1889.4 | 1889.4  | 1892.2 | 1885.0 | 1884.9  | 1888.2 |
| gdb 4285 | 1892.8 <sup>a</sup> | 1899.4 | 1899.4  | 1901.0 | 1891.6 | 1891.6  | 1895.1 |
| gdb 4286 | 1890.3 <sup>a</sup> | 1893.6 | 1893.6  | 1897.2 | 1892.4 | 1892.4  | 1894.4 |
| gdb 4287 | 1890.6 <sup>a</sup> | 1897.1 | 1897.1  | 1899.3 | 1895.1 | 1895.1  | 1896.7 |

... continued on next page ...

Table S73: ... continued from previous page ...

| Species  | Ref.                | OM2    | OM2-D3T | ODM2   | OM3    | OM3-D3T | ODM3   |
|----------|---------------------|--------|---------|--------|--------|---------|--------|
| gdb 4288 | 1891.3 <sup>a</sup> | 1895.4 | 1895.4  | 1897.8 | 1888.8 | 1888.7  | 1893.0 |
| gdb 4289 | 1893.1 <sup>a</sup> | 1901.1 | 1901.1  | 1903.5 | 1899.1 | 1899.1  | 1901.4 |
| gdb 4290 | 1883.0 <sup>a</sup> | 1887.7 | 1887.7  | 1890.7 | 1884.9 | 1884.8  | 1888.1 |
| gdb 4291 | 1885.8 <sup>a</sup> | 1892.9 | 1892.9  | 1895.6 | 1887.8 | 1887.8  | 1891.5 |
| gdb 4292 | 1891.5 <sup>a</sup> | 1895.2 | 1895.2  | 1897.4 | 1888.5 | 1888.5  | 1892.5 |
| gdb 4293 | 1893.5 <sup>a</sup> | 1900.4 | 1900.4  | 1904.2 | 1898.5 | 1898.5  | 1901.5 |
| gdb 4294 | 1895.1 <sup>a</sup> | 1901.8 | 1901.8  | 1905.4 | 1900.0 | 1900.0  | 1902.6 |
| gdb 4295 | 1870.5 <sup>a</sup> | 1866.9 | 1866.9  | 1869.6 | 1861.8 | 1861.8  | 1865.3 |
| gdb 4296 | 1876.7 <sup>a</sup> | 1878.1 | 1878.1  | 1881.3 | 1875.8 | 1875.8  | 1878.9 |
| gdb 4297 | 1877.5 <sup>a</sup> | 1881.3 | 1881.3  | 1885.6 | 1879.0 | 1879.0  | 1882.4 |
| gdb 4298 | 1916.0 <sup>a</sup> | 1919.8 | 1919.8  | 1922.1 | 1920.8 | 1920.8  | 1921.6 |
| gdb 4299 | 1923.3 <sup>a</sup> | 1920.5 | 1920.5  | 1920.7 | 1916.9 | 1916.9  | 1919.4 |
| gdb 4300 | 1887.1 <sup>a</sup> | 1885.9 | 1885.9  | 1885.2 | 1880.7 | 1880.7  | 1877.9 |
| gdb 4301 | 1904.6 <sup>a</sup> | 1912.4 | 1912.4  | 1915.0 | 1914.1 | 1914.1  | 1915.9 |
| gdb 4302 | 1886.1 <sup>a</sup> | 1885.0 | 1885.0  | 1884.3 | 1880.4 | 1880.4  | 1877.5 |
| gdb 4303 | 1911.0 <sup>a</sup> | 1915.9 | 1915.8  | 1916.5 | 1917.0 | 1917.0  | 1917.0 |
| gdb 4304 | 1909.0 <sup>a</sup> | 1918.2 | 1918.2  | 1919.1 | 1919.4 | 1919.4  | 1919.4 |
| gdb 4305 | 1880.8 <sup>a</sup> | 1881.0 | 1881.0  | 1879.4 | 1876.8 | 1876.8  | 1874.1 |
| gdb 4306 | 1903.9 <sup>a</sup> | 1912.2 | 1912.2  | 1913.3 | 1913.2 | 1913.2  | 1914.1 |
| gdb 4307 | 1908.2 <sup>a</sup> | 1912.6 | 1912.6  | 1913.8 | 1913.3 | 1913.2  | 1914.0 |
| gdb 4308 | 1902.8 <sup>a</sup> | 1909.1 | 1909.0  | 1910.2 | 1911.6 | 1911.6  | 1912.8 |
| gdb 4309 | 1870.2 <sup>a</sup> | 1867.8 | 1867.8  | 1869.9 | 1864.8 | 1864.8  | 1866.2 |
| gdb 4310 | 1877.3 <sup>a</sup> | 1884.1 | 1884.0  | 1888.3 | 1883.6 | 1883.6  | 1884.7 |
| gdb 4311 | 1877.9 <sup>a</sup> | 1874.4 | 1874.4  | 1876.4 | 1872.4 | 1872.4  | 1874.4 |
| gdb 4312 | 1892.4 <sup>a</sup> | 1896.6 | 1896.6  | 1899.4 | 1894.7 | 1894.7  | 1897.2 |
| gdb 4313 | 1892.5 <sup>a</sup> | 1900.4 | 1900.4  | 1904.1 | 1898.6 | 1898.6  | 1901.4 |
| gdb 4314 | 1913.4 <sup>a</sup> | 1917.4 | 1917.4  | 1919.7 | 1917.4 | 1917.4  | 1918.2 |
| gdb 4315 | 1916.7 <sup>a</sup> | 1917.4 | 1917.4  | 1918.9 | 1917.4 | 1917.4  | 1917.9 |
| gdb 4316 | 1908.8 <sup>a</sup> | 1913.0 | 1913.0  | 1913.8 | 1913.5 | 1913.5  | 1913.7 |
| gdb 4317 | 1910.0 <sup>a</sup> | 1916.2 | 1916.2  | 1917.8 | 1916.7 | 1916.6  | 1917.2 |
| gdb 4318 | 1888.7 <sup>a</sup> | 1889.3 | 1889.3  | 1892.2 | 1889.9 | 1889.9  | 1890.3 |
| gdb 4319 | 1898.4 <sup>a</sup> | 1904.2 | 1904.2  | 1905.0 | 1902.3 | 1902.3  | 1905.1 |
| gdb 4320 | 1906.4 <sup>a</sup> | 1908.6 | 1908.6  | 1909.8 | 1910.0 | 1910.0  | 1911.4 |
| gdb 4321 | 1903.9 <sup>a</sup> | 1910.9 | 1910.9  | 1912.4 | 1910.4 | 1910.4  | 1911.9 |
| gdb 4322 | 1906.2 <sup>a</sup> | 1910.1 | 1910.1  | 1911.6 | 1909.7 | 1909.7  | 1910.6 |
| gdb 4323 | 1886.1 <sup>a</sup> | 1885.4 | 1885.4  | 1888.9 | 1882.3 | 1882.3  | 1884.2 |
| gdb 4324 | 1879.8 <sup>a</sup> | 1880.5 | 1880.5  | 1882.9 | 1877.4 | 1877.4  | 1879.9 |
| gdb 4325 | 1907.5 <sup>a</sup> | 1915.7 | 1915.7  | 1917.1 | 1916.8 | 1916.8  | 1917.5 |
| gdb 4326 | 1878.9 <sup>a</sup> | 1879.7 | 1879.7  | 1879.7 | 1875.1 | 1875.1  | 1873.4 |
| gdb 4327 | 1913.2 <sup>a</sup> | 1910.9 | 1910.9  | 1912.2 | 1908.2 | 1908.1  | 1912.0 |
| gdb 4328 | 1900.4 <sup>a</sup> | 1907.1 | 1907.1  | 1910.0 | 1909.8 | 1909.7  | 1912.0 |
| gdb 4329 | 1890.4 <sup>a</sup> | 1886.5 | 1886.5  | 1886.3 | 1882.0 | 1882.0  | 1880.0 |
| gdb 4330 | 1887.3 <sup>a</sup> | 1886.5 | 1886.5  | 1888.7 | 1888.2 | 1888.2  | 1888.8 |
| gdb 4331 | 1887.8 <sup>a</sup> | 1882.7 | 1882.7  | 1882.4 | 1878.6 | 1878.6  | 1876.5 |
| gdb 4332 | 1890.5 <sup>a</sup> | 1886.6 | 1886.6  | 1886.4 | 1881.9 | 1881.9  | 1879.9 |
| gdb 4333 | 1886.9 <sup>a</sup> | 1887.2 | 1887.2  | 1890.5 | 1888.5 | 1888.4  | 1889.2 |
| gdb 4334 | 1881.7 <sup>a</sup> | 1881.2 | 1881.1  | 1885.3 | 1878.5 | 1878.5  | 1881.1 |
| gdb 4335 | 1879.5 <sup>a</sup> | 1877.4 | 1877.4  | 1877.9 | 1873.7 | 1873.7  | 1872.5 |
| gdb 4336 | 1885.5 <sup>a</sup> | 1883.4 | 1883.4  | 1886.0 | 1881.2 | 1881.2  | 1883.6 |
| gdb 4337 | 1884.0 <sup>a</sup> | 1880.7 | 1880.7  | 1882.9 | 1878.4 | 1878.4  | 1880.8 |
| gdb 4338 | 1895.8 <sup>a</sup> | 1894.4 | 1894.4  | 1896.3 | 1894.7 | 1894.6  | 1895.1 |
| gdb 4339 | 1909.0 <sup>a</sup> | 1910.6 | 1910.6  | 1911.4 | 1907.5 | 1907.5  | 1911.1 |
| gdb 4340 | 1905.8 <sup>a</sup> | 1912.7 | 1912.7  | 1915.6 | 1914.1 | 1914.1  | 1915.8 |
| gdb 4341 | 1886.7 <sup>a</sup> | 1883.6 | 1883.6  | 1882.6 | 1878.4 | 1878.4  | 1876.0 |
| gdb 4342 | 1904.8 <sup>a</sup> | 1906.5 | 1906.5  | 1907.8 | 1908.3 | 1908.3  | 1909.8 |
| gdb 4343 | 1881.1 <sup>a</sup> | 1876.3 | 1876.3  | 1875.5 | 1872.5 | 1872.5  | 1869.9 |
| gdb 4344 | 1911.5 <sup>a</sup> | 1909.1 | 1909.0  | 1909.9 | 1906.2 | 1906.2  | 1909.3 |
| gdb 4345 | 1908.3 <sup>a</sup> | 1912.9 | 1912.9  | 1915.3 | 1913.8 | 1913.8  | 1914.7 |
| gdb 4346 | 1916.6 <sup>a</sup> | 1927.7 | 1927.7  | 1928.1 | 1929.8 | 1929.8  | 1929.9 |
| gdb 4347 | 1914.4 <sup>a</sup> | 1918.4 | 1918.4  | 1920.1 | 1918.9 | 1918.9  | 1919.1 |
| gdb 4348 | 1920.4 <sup>a</sup> | 1917.0 | 1917.0  | 1917.8 | 1913.1 | 1913.1  | 1915.8 |
| gdb 4349 | 1906.6 <sup>a</sup> | 1911.6 | 1911.6  | 1912.3 | 1908.8 | 1908.8  | 1910.7 |
| gdb 4350 | 1894.9 <sup>a</sup> | 1899.8 | 1899.8  | 1897.5 | 1896.1 | 1896.1  | 1892.7 |
| gdb 4351 | 1912.0 <sup>a</sup> | 1910.5 | 1910.5  | 1911.3 | 1907.8 | 1907.8  | 1909.2 |
| gdb 4352 | 1894.5 <sup>a</sup> | 1904.2 | 1904.2  | 1905.9 | 1902.6 | 1902.6  | 1903.7 |

... continued on next page ...

Table S73: ... continued from previous page ...

| Species  | Ref.                | OM2    | OM2-D3T | ODM2   | OM3    | OM3-D3T | ODM3   |
|----------|---------------------|--------|---------|--------|--------|---------|--------|
| gdb 4353 | 1903.3 <sup>a</sup> | 1912.4 | 1912.4  | 1914.5 | 1914.1 | 1914.1  | 1913.6 |
| gdb 4354 | 1917.8 <sup>a</sup> | 1928.2 | 1928.2  | 1928.8 | 1930.9 | 1930.9  | 1931.9 |
| gdb 4355 | 1898.4 <sup>a</sup> | 1900.6 | 1900.6  | 1898.6 | 1896.5 | 1896.5  | 1893.4 |
| gdb 4356 | 1909.2 <sup>a</sup> | 1905.7 | 1905.7  | 1906.3 | 1902.8 | 1902.7  | 1904.8 |
| gdb 4357 | 1896.9 <sup>a</sup> | 1902.2 | 1902.2  | 1903.0 | 1900.3 | 1900.3  | 1901.4 |
| gdb 4358 | 1903.5 <sup>a</sup> | 1907.5 | 1907.5  | 1908.0 | 1909.2 | 1909.2  | 1908.5 |
| gdb 4359 | 1915.1 <sup>a</sup> | 1919.8 | 1919.8  | 1921.5 | 1920.4 | 1920.4  | 1920.7 |
| gdb 4360 | 1921.3 <sup>a</sup> | 1917.9 | 1917.9  | 1918.8 | 1914.4 | 1914.4  | 1917.3 |
| gdb 4361 | 1906.5 <sup>a</sup> | 1912.2 | 1912.2  | 1913.0 | 1909.2 | 1909.2  | 1911.1 |
| gdb 4362 | 1899.9 <sup>a</sup> | 1902.9 | 1902.9  | 1903.9 | 1901.2 | 1901.1  | 1903.1 |
| gdb 4363 | 1911.8 <sup>a</sup> | 1907.9 | 1907.9  | 1909.0 | 1905.2 | 1905.1  | 1908.2 |
| gdb 4364 | 1906.4 <sup>a</sup> | 1911.5 | 1911.5  | 1913.0 | 1913.0 | 1912.9  | 1913.9 |
| gdb 4365 | 1924.7 <sup>a</sup> | 1934.0 | 1934.0  | 1934.2 | 1936.5 | 1936.5  | 1936.7 |
| gdb 4366 | 1906.4 <sup>a</sup> | 1907.4 | 1907.4  | 1909.2 | 1904.2 | 1904.2  | 1908.3 |
| gdb 4367 | 1899.7 <sup>a</sup> | 1905.7 | 1905.7  | 1906.9 | 1903.9 | 1903.9  | 1906.3 |
| gdb 4368 | 1905.6 <sup>a</sup> | 1910.3 | 1910.3  | 1912.7 | 1912.4 | 1912.3  | 1913.4 |
| gdb 4369 | 1908.2 <sup>a</sup> | 1916.9 | 1916.9  | 1918.9 | 1918.2 | 1918.2  | 1918.4 |
| gdb 4370 | 1901.9 <sup>a</sup> | 1911.8 | 1911.8  | 1913.1 | 1909.8 | 1909.7  | 1911.3 |
| gdb 4371 | 1873.4 <sup>a</sup> | 1874.8 | 1874.8  | 1873.6 | 1867.2 | 1867.2  | 1866.0 |
| gdb 4372 | 1880.1 <sup>a</sup> | 1879.3 | 1879.3  | 1877.6 | 1875.0 | 1875.0  | 1872.2 |
| gdb 4373 | 1869.2 <sup>a</sup> | 1875.8 | 1875.8  | 1880.0 | 1872.4 | 1872.4  | 1874.9 |
| gdb 4374 | 1868.8 <sup>a</sup> | 1876.2 | 1876.2  | 1879.4 | 1872.2 | 1872.2  | 1874.5 |
| gdb 4375 | 1871.5 <sup>a</sup> | 1877.4 | 1877.4  | 1882.2 | 1874.5 | 1874.4  | 1877.5 |
| gdb 4376 | 1879.1 <sup>a</sup> | 1883.5 | 1883.5  | 1886.2 | 1883.2 | 1883.2  | 1883.8 |
| gdb 4377 | 1871.0 <sup>a</sup> | 1879.6 | 1879.6  | 1882.2 | 1875.3 | 1875.3  | 1879.9 |
| gdb 4378 | 1872.1 <sup>a</sup> | 1878.6 | 1878.6  | 1881.4 | 1874.9 | 1874.9  | 1876.9 |
| gdb 4379 | 1871.4 <sup>a</sup> | 1882.7 | 1882.7  | 1885.0 | 1872.3 | 1872.2  | 1875.8 |
| gdb 4380 | 1870.7 <sup>a</sup> | 1882.0 | 1882.0  | 1884.8 | 1871.5 | 1871.5  | 1875.7 |
| gdb 4381 | 1879.6 <sup>a</sup> | 1887.9 | 1887.9  | 1891.7 | 1886.8 | 1886.8  | 1887.4 |
| gdb 4382 | 1910.3 <sup>a</sup> | 1916.0 | 1915.9  | 1916.5 | 1916.8 | 1916.8  | 1916.8 |
| gdb 4383 | 1899.6 <sup>a</sup> | 1909.6 | 1909.6  | 1910.9 | 1907.7 | 1907.7  | 1909.8 |
| gdb 4384 | 1915.6 <sup>a</sup> | 1919.5 | 1919.5  | 1919.8 | 1920.0 | 1920.0  | 1919.2 |
| gdb 4385 | 1907.3 <sup>a</sup> | 1913.1 | 1913.1  | 1913.7 | 1910.1 | 1910.1  | 1911.8 |
| gdb 4386 | 1871.2 <sup>a</sup> | 1877.2 | 1877.1  | 1880.5 | 1873.8 | 1873.7  | 1876.2 |
| gdb 4387 | 1879.6 <sup>a</sup> | 1884.1 | 1884.1  | 1888.0 | 1884.0 | 1883.9  | 1885.1 |
| gdb 4388 | 1908.2 <sup>a</sup> | 1913.8 | 1913.8  | 1915.5 | 1915.3 | 1915.3  | 1915.8 |
| gdb 4389 | 1901.6 <sup>a</sup> | 1908.1 | 1908.1  | 1909.3 | 1906.0 | 1906.0  | 1908.0 |
| gdb 4390 | 1903.2 <sup>a</sup> | 1904.7 | 1904.7  | 1905.6 | 1902.9 | 1902.9  | 1905.7 |
| gdb 4391 | 1910.8 <sup>a</sup> | 1910.8 | 1910.8  | 1912.8 | 1913.0 | 1913.0  | 1914.1 |
| gdb 4392 | 1916.4 <sup>a</sup> | 1928.0 | 1928.0  | 1928.6 | 1930.3 | 1930.2  | 1930.8 |
| gdb 4393 | 1895.5 <sup>a</sup> | 1901.5 | 1901.5  | 1903.0 | 1899.3 | 1899.3  | 1902.4 |
| gdb 4394 | 1897.2 <sup>a</sup> | 1902.2 | 1902.1  | 1903.5 | 1900.1 | 1900.1  | 1903.3 |
| gdb 4395 | 1903.1 <sup>a</sup> | 1906.7 | 1906.7  | 1909.1 | 1908.3 | 1908.3  | 1909.7 |
| gdb 4396 | 1870.0 <sup>a</sup> | 1875.8 | 1875.7  | 1878.6 | 1867.5 | 1867.5  | 1871.5 |
| gdb 4397 | 1870.1 <sup>a</sup> | 1875.0 | 1875.0  | 1878.0 | 1867.3 | 1867.2  | 1871.5 |
| gdb 4398 | 1869.6 <sup>a</sup> | 1873.0 | 1872.9  | 1876.4 | 1871.2 | 1871.1  | 1873.9 |
| gdb 4399 | 1864.2 <sup>a</sup> | 1864.7 | 1864.7  | 1867.3 | 1858.4 | 1858.4  | 1862.8 |
| gdb 4400 | 1864.3 <sup>a</sup> | 1866.3 | 1866.3  | 1868.4 | 1857.8 | 1857.8  | 1863.1 |
| gdb 4401 | 1871.0 <sup>a</sup> | 1870.7 | 1870.7  | 1872.6 | 1862.8 | 1862.8  | 1868.4 |
| gdb 4402 | 1870.9 <sup>a</sup> | 1871.8 | 1871.8  | 1874.5 | 1868.8 | 1868.8  | 1871.7 |
| gdb 4403 | 1895.4 <sup>a</sup> | 1902.9 | 1902.9  | 1904.3 | 1902.3 | 1902.3  | 1904.9 |
| gdb 4404 | 1902.3 <sup>a</sup> | 1908.6 | 1908.6  | 1910.9 | 1911.3 | 1911.3  | 1912.6 |
| gdb 4405 | 1859.0 <sup>a</sup> | 1855.6 | 1855.6  | 1859.0 | 1852.0 | 1852.0  | 1854.5 |
| gdb 4406 | 1857.1 <sup>a</sup> | 1854.7 | 1854.7  | 1858.1 | 1851.8 | 1851.8  | 1854.3 |
| gdb 4407 | 1865.1 <sup>a</sup> | 1868.9 | 1868.8  | 1872.6 | 1867.6 | 1867.5  | 1868.8 |
| gdb 4408 | 1892.5 <sup>a</sup> | 1903.4 | 1903.4  | 1904.6 | 1903.9 | 1903.8  | 1905.6 |
| gdb 4409 | 1834.6 <sup>a</sup> | 1816.8 | 1816.8  | 1819.2 | 1811.7 | 1811.7  | 1812.3 |
| gdb 4410 | 1830.8 <sup>a</sup> | 1814.6 | 1814.6  | 1816.5 | 1810.2 | 1810.2  | 1811.3 |
| gdb 4411 | 1837.6 <sup>a</sup> | 1827.2 | 1827.1  | 1829.5 | 1825.0 | 1825.0  | 1824.8 |
| gdb 4412 | 1846.2 <sup>a</sup> | 1825.4 | 1825.3  | 1831.9 | 1824.9 | 1824.9  | 1828.5 |
| gdb 4413 | 1839.5 <sup>a</sup> | 1821.8 | 1821.8  | 1825.1 | 1819.8 | 1819.8  | 1823.1 |
| gdb 4414 | 1840.9 <sup>a</sup> | 1826.7 | 1826.7  | 1829.4 | 1823.7 | 1823.7  | 1826.8 |
| gdb 4415 | 1847.6 <sup>a</sup> | 1839.3 | 1839.3  | 1843.9 | 1839.1 | 1839.1  | 1841.5 |
| gdb 4416 | 1852.0 <sup>a</sup> | 1841.7 | 1841.7  | 1846.3 | 1841.7 | 1841.6  | 1844.0 |
| gdb 4417 | 1902.4 <sup>a</sup> | 1891.2 | 1891.2  | 1893.6 | 1889.8 | 1889.8  | 1892.8 |

... continued on next page ...



Table S73: ... continued from previous page ...

| Species  | Ref.                | OM2    | OM2-D3T | ODM2   | OM3    | OM3-D3T | ODM3   |
|----------|---------------------|--------|---------|--------|--------|---------|--------|
| gdb 4418 | 1880.8 <sup>a</sup> | 1883.3 | 1883.3  | 1886.2 | 1882.7 | 1882.7  | 1885.3 |
| gdb 4419 | 1879.1 <sup>a</sup> | 1881.2 | 1881.2  | 1881.2 | 1883.8 | 1880.7  | 1883.6 |
| gdb 4420 | 1885.4 <sup>a</sup> | 1893.0 | 1893.0  | 1897.4 | 1894.7 | 1894.7  | 1896.9 |
| gdb 4421 | 1873.5 <sup>a</sup> | 1876.2 | 1876.2  | 1875.3 | 1872.1 | 1872.1  | 1870.0 |
| gdb 4422 | 1870.8 <sup>a</sup> | 1868.6 | 1868.5  | 1870.4 | 1869.2 | 1869.1  | 1870.8 |
| gdb 4423 | 1872.4 <sup>a</sup> | 1872.6 | 1872.5  | 1874.0 | 1871.5 | 1871.5  | 1873.1 |
| gdb 4424 | 1881.0 <sup>a</sup> | 1885.4 | 1885.4  | 1887.5 | 1886.6 | 1886.6  | 1887.0 |
| gdb 4425 | 1849.1 <sup>a</sup> | 1840.6 | 1840.6  | 1840.6 | 1833.1 | 1833.1  | 1832.2 |
| gdb 4426 | 1848.7 <sup>a</sup> | 1840.8 | 1840.8  | 1840.7 | 1833.6 | 1833.5  | 1832.9 |
| gdb 4427 | 1847.7 <sup>a</sup> | 1834.0 | 1834.0  | 1837.2 | 1830.5 | 1830.5  | 1833.1 |
| gdb 4428 | 1854.1 <sup>a</sup> | 1851.8 | 1851.8  | 1852.0 | 1846.6 | 1846.6  | 1844.8 |
| gdb 4429 | 1854.7 <sup>a</sup> | 1846.7 | 1846.7  | 1851.3 | 1845.8 | 1845.7  | 1847.3 |
| gdb 4430 | 1856.5 <sup>a</sup> | 1850.4 | 1850.4  | 1854.8 | 1848.4 | 1848.3  | 1850.2 |
| gdb 4431 | 1883.5 <sup>a</sup> | 1884.9 | 1884.9  | 1887.6 | 1882.2 | 1882.1  | 1884.5 |
| gdb 4432 | 1897.8 <sup>a</sup> | 1887.5 | 1887.4  | 1888.9 | 1885.2 | 1885.2  | 1887.6 |
| gdb 4433 | 1879.7 <sup>a</sup> | 1880.9 | 1880.9  | 1883.6 | 1879.3 | 1879.3  | 1881.1 |
| gdb 4434 | 1879.0 <sup>a</sup> | 1881.8 | 1881.8  | 1884.3 | 1880.0 | 1880.0  | 1881.8 |
| gdb 4435 | 1878.9 <sup>a</sup> | 1880.1 | 1880.1  | 1882.3 | 1878.8 | 1878.8  | 1881.2 |
| gdb 4436 | 1885.1 <sup>a</sup> | 1892.7 | 1892.7  | 1896.7 | 1893.7 | 1893.7  | 1895.2 |
| gdb 4437 | 1877.8 <sup>a</sup> | 1879.3 | 1879.3  | 1882.3 | 1873.3 | 1873.3  | 1876.8 |
| gdb 4438 | 1884.7 <sup>a</sup> | 1891.6 | 1891.6  | 1895.8 | 1888.2 | 1888.1  | 1890.5 |
| gdb 4439 | 1883.4 <sup>a</sup> | 1882.8 | 1882.8  | 1885.3 | 1879.9 | 1879.9  | 1881.9 |
| gdb 4440 | 1893.1 <sup>a</sup> | 1901.9 | 1901.9  | 1902.8 | 1903.6 | 1903.6  | 1904.3 |
| gdb 4441 | 1840.6 <sup>a</sup> | 1838.6 | 1838.5  | 1840.5 | 1833.1 | 1833.1  | 1837.0 |
| gdb 4442 | 1847.5 <sup>a</sup> | 1853.6 | 1853.5  | 1858.0 | 1850.4 | 1850.4  | 1853.2 |
| gdb 4443 | 1852.5 <sup>a</sup> | 1849.0 | 1849.0  | 1852.1 | 1846.9 | 1846.9  | 1849.5 |
| gdb 4444 | 1896.3 <sup>a</sup> | 1894.2 | 1894.2  | 1892.1 | 1890.5 | 1890.5  | 1887.8 |
| gdb 4445 | 1889.1 <sup>a</sup> | 1893.4 | 1893.4  | 1895.0 | 1892.7 | 1892.7  | 1894.4 |
| gdb 4446 | 1894.0 <sup>a</sup> | 1896.7 | 1896.5  | 1898.2 | 1895.2 | 1895.1  | 1897.1 |
| gdb 4447 | 1900.2 <sup>a</sup> | 1902.6 | 1902.6  | 1904.5 | 1904.7 | 1904.7  | 1905.1 |
| gdb 4448 | 1895.3 <sup>a</sup> | 1900.1 | 1900.1  | 1897.7 | 1896.3 | 1896.3  | 1892.7 |
| gdb 4449 | 1893.9 <sup>a</sup> | 1899.7 | 1899.7  | 1901.3 | 1899.8 | 1899.8  | 1900.5 |
| gdb 4450 | 1894.2 <sup>a</sup> | 1904.4 | 1904.4  | 1906.0 | 1902.7 | 1902.7  | 1903.5 |
| gdb 4451 | 1903.3 <sup>a</sup> | 1909.3 | 1909.3  | 1910.3 | 1910.7 | 1910.7  | 1909.6 |
| gdb 4452 | 1877.8 <sup>a</sup> | 1874.7 | 1874.7  | 1873.1 | 1866.4 | 1866.4  | 1865.6 |
| gdb 4453 | 1886.0 <sup>a</sup> | 1881.3 | 1881.3  | 1880.8 | 1876.6 | 1876.6  | 1874.3 |
| gdb 4454 | 1881.4 <sup>a</sup> | 1879.1 | 1879.1  | 1882.1 | 1877.7 | 1877.7  | 1879.6 |
| gdb 4455 | 1829.4 <sup>a</sup> | 1817.0 | 1817.0  | 1818.9 | 1813.5 | 1813.5  | 1814.6 |
| gdb 4456 | 1837.1 <sup>a</sup> | 1825.4 | 1825.4  | 1828.9 | 1825.5 | 1825.5  | 1825.7 |
| gdb 4457 | 1844.1 <sup>a</sup> | 1828.3 | 1828.3  | 1833.6 | 1827.9 | 1827.9  | 1831.6 |
| gdb 4458 | 1847.6 <sup>a</sup> | 1834.8 | 1834.8  | 1837.9 | 1833.1 | 1833.1  | 1836.4 |
| gdb 4459 | 1854.4 <sup>a</sup> | 1841.3 | 1841.3  | 1843.6 | 1839.0 | 1839.0  | 1842.0 |
| gdb 4460 | 1855.2 <sup>a</sup> | 1841.7 | 1841.7  | 1844.2 | 1839.4 | 1839.4  | 1842.5 |
| gdb 4461 | 1860.4 <sup>a</sup> | 1853.5 | 1853.5  | 1852.5 | 1846.4 | 1846.4  | 1844.9 |
| gdb 4462 | 1860.9 <sup>a</sup> | 1846.0 | 1846.0  | 1848.0 | 1847.2 | 1847.2  | 1848.4 |
| gdb 4463 | 1862.7 <sup>a</sup> | 1847.6 | 1847.6  | 1850.2 | 1848.6 | 1848.6  | 1849.9 |
| gdb 4464 | 1869.0 <sup>a</sup> | 1861.9 | 1861.9  | 1861.3 | 1858.2 | 1858.2  | 1855.0 |
| gdb 4465 | 1859.5 <sup>a</sup> | 1855.6 | 1855.6  | 1858.2 | 1855.0 | 1854.9  | 1856.7 |
| gdb 4466 | 1885.4 <sup>a</sup> | 1892.2 | 1892.2  | 1894.5 | 1887.6 | 1887.6  | 1890.8 |
| gdb 4467 | 1893.7 <sup>a</sup> | 1899.6 | 1899.6  | 1902.5 | 1898.4 | 1898.4  | 1900.2 |
| gdb 4468 | 1885.8 <sup>a</sup> | 1892.3 | 1892.3  | 1895.5 | 1887.2 | 1887.1  | 1891.1 |
| gdb 4469 | 1892.3 <sup>a</sup> | 1896.2 | 1896.2  | 1898.7 | 1894.4 | 1894.3  | 1896.7 |
| gdb 4470 | 1886.7 <sup>a</sup> | 1890.0 | 1890.0  | 1892.0 | 1890.1 | 1890.1  | 1892.4 |
| gdb 4471 | 1892.3 <sup>a</sup> | 1895.4 | 1895.4  | 1897.3 | 1894.9 | 1894.9  | 1897.1 |
| gdb 4472 | 1898.3 <sup>a</sup> | 1900.0 | 1900.0  | 1901.0 | 1902.6 | 1902.6  | 1902.9 |
| gdb 4473 | 1921.0 <sup>a</sup> | 1907.7 | 1907.7  | 1909.3 | 1906.4 | 1906.4  | 1909.0 |
| gdb 4474 | 1894.4 <sup>a</sup> | 1902.5 | 1902.5  | 1905.4 | 1901.3 | 1901.2  | 1903.8 |
| gdb 4475 | 1898.2 <sup>a</sup> | 1905.1 | 1905.1  | 1908.0 | 1904.2 | 1904.2  | 1907.1 |
| gdb 4476 | 1903.9 <sup>a</sup> | 1911.0 | 1911.0  | 1914.5 | 1913.4 | 1913.3  | 1914.8 |
| gdb 4477 | 1828.9 <sup>a</sup> | 1814.2 | 1814.2  | 1817.3 | 1811.0 | 1811.0  | 1812.2 |
| gdb 4478 | 1838.9 <sup>a</sup> | 1827.9 | 1827.9  | 1829.4 | 1822.2 | 1822.1  | 1822.9 |
| gdb 4479 | 1845.9 <sup>a</sup> | 1834.5 | 1834.5  | 1835.9 | 1831.9 | 1831.9  | 1830.9 |
| gdb 4480 | 1845.4 <sup>a</sup> | 1829.7 | 1829.7  | 1835.9 | 1829.8 | 1829.8  | 1833.6 |
| gdb 4481 | 1859.8 <sup>a</sup> | 1847.7 | 1847.7  | 1851.7 | 1844.4 | 1844.4  | 1848.7 |
| gdb 4482 | 1861.5 <sup>a</sup> | 1851.0 | 1851.0  | 1853.3 | 1847.7 | 1847.7  | 1851.1 |

... continued on next page ...

Table S73: ... continued from previous page ...

| Species  | Ref.                | OM2    | OM2-D3T | ODM2   | OM3    | OM3-D3T | ODM3   |
|----------|---------------------|--------|---------|--------|--------|---------|--------|
| gdb 4483 | 1871.7 <sup>a</sup> | 1859.8 | 1859.8  | 1863.4 | 1860.1 | 1860.1  | 1861.9 |
| gdb 4484 | 1868.6 <sup>a</sup> | 1861.6 | 1861.6  | 1866.2 | 1860.8 | 1860.8  | 1863.9 |
| gdb 4485 | 1850.8 <sup>a</sup> | 1837.8 | 1837.8  | 1841.0 | 1832.9 | 1832.9  | 1834.8 |
| gdb 4486 | 1850.8 <sup>a</sup> | 1838.6 | 1838.6  | 1840.4 | 1834.7 | 1834.7  | 1836.6 |
| gdb 4487 | 1857.6 <sup>a</sup> | 1844.0 | 1844.0  | 1845.7 | 1843.2 | 1843.2  | 1842.9 |
| gdb 4488 | 1863.3 <sup>a</sup> | 1846.8 | 1846.8  | 1852.4 | 1846.0 | 1846.0  | 1850.2 |
| gdb 4489 | 1829.6 <sup>a</sup> | 1818.8 | 1818.8  | 1819.1 | 1814.5 | 1814.5  | 1814.1 |
| gdb 4490 | 1868.4 <sup>a</sup> | 1865.6 | 1865.6  | 1866.2 | 1858.8 | 1858.7  | 1858.6 |
| gdb 4491 | 1874.0 <sup>a</sup> | 1870.4 | 1870.4  | 1870.2 | 1866.1 | 1866.1  | 1864.1 |
| gdb 4492 | 1837.6 <sup>a</sup> | 1827.3 | 1827.3  | 1830.6 | 1828.4 | 1828.4  | 1830.4 |
| gdb 4493 | 1901.8 <sup>a</sup> | 1907.1 | 1907.1  | 1911.2 | 1905.1 | 1905.1  | 1907.9 |
| gdb 4494 | 1921.0 <sup>a</sup> | 1907.4 | 1907.3  | 1908.9 | 1906.3 | 1906.3  | 1909.0 |
| gdb 4495 | 1897.3 <sup>a</sup> | 1904.9 | 1904.9  | 1908.1 | 1904.0 | 1904.0  | 1906.9 |
| gdb 4496 | 1898.1 <sup>a</sup> | 1905.1 | 1905.1  | 1908.0 | 1904.2 | 1904.2  | 1907.1 |
| gdb 4497 | 1904.6 <sup>a</sup> | 1910.2 | 1910.2  | 1912.3 | 1912.2 | 1912.2  | 1913.3 |
| gdb 4498 | 1896.7 <sup>a</sup> | 1894.4 | 1894.4  | 1892.4 | 1890.6 | 1890.6  | 1888.0 |
| gdb 4499 | 1887.6 <sup>a</sup> | 1891.6 | 1891.6  | 1893.3 | 1890.1 | 1890.1  | 1892.0 |
| gdb 4500 | 1892.9 <sup>a</sup> | 1896.0 | 1896.0  | 1897.7 | 1894.3 | 1894.3  | 1896.4 |
| gdb 4501 | 1899.0 <sup>a</sup> | 1903.9 | 1903.9  | 1905.7 | 1905.4 | 1905.4  | 1905.6 |
| gdb 4502 | 1892.9 <sup>a</sup> | 1893.4 | 1893.4  | 1895.3 | 1891.5 | 1891.5  | 1892.7 |
| gdb 4503 | 1886.8 <sup>a</sup> | 1892.0 | 1892.0  | 1895.2 | 1890.3 | 1890.3  | 1893.4 |
| gdb 4504 | 1892.9 <sup>a</sup> | 1896.3 | 1896.3  | 1900.0 | 1894.5 | 1894.4  | 1898.2 |
| gdb 4505 | 1900.7 <sup>a</sup> | 1903.3 | 1903.2  | 1906.9 | 1904.9 | 1904.9  | 1906.8 |
| gdb 4506 | 1893.3 <sup>a</sup> | 1899.0 | 1899.0  | 1901.8 | 1889.0 | 1889.0  | 1894.0 |
| gdb 4507 | 1890.5 <sup>a</sup> | 1894.4 | 1894.4  | 1897.1 | 1887.3 | 1887.3  | 1891.4 |
| gdb 4508 | 1900.2 <sup>a</sup> | 1903.7 | 1903.7  | 1907.4 | 1899.8 | 1899.8  | 1902.3 |
| gdb 4509 | 1894.5 <sup>a</sup> | 1897.7 | 1897.7  | 1902.2 | 1894.2 | 1894.2  | 1898.2 |
| gdb 4510 | 1897.7 <sup>a</sup> | 1899.9 | 1899.9  | 1897.5 | 1895.2 | 1895.2  | 1891.7 |
| gdb 4511 | 1892.6 <sup>a</sup> | 1897.8 | 1897.8  | 1899.3 | 1896.4 | 1896.4  | 1898.1 |
| gdb 4512 | 1896.3 <sup>a</sup> | 1902.4 | 1902.3  | 1903.2 | 1900.1 | 1900.0  | 1901.0 |
| gdb 4513 | 1903.2 <sup>a</sup> | 1906.8 | 1906.8  | 1907.1 | 1907.8 | 1907.8  | 1906.3 |
| gdb 4514 | 1870.6 <sup>a</sup> | 1869.7 | 1869.7  | 1869.0 | 1861.8 | 1861.8  | 1861.9 |
| gdb 4515 | 1877.8 <sup>a</sup> | 1876.3 | 1876.3  | 1876.6 | 1871.7 | 1871.7  | 1870.2 |
| gdb 4516 | 1871.9 <sup>a</sup> | 1870.6 | 1870.6  | 1873.2 | 1869.8 | 1869.8  | 1872.9 |
| gdb 4517 | 1861.5 <sup>a</sup> | 1850.9 | 1850.9  | 1853.2 | 1847.6 | 1847.6  | 1851.1 |
| gdb 4518 | 1871.0 <sup>a</sup> | 1860.5 | 1860.5  | 1862.8 | 1860.7 | 1860.7  | 1862.2 |
| gdb 4519 | 1871.0 <sup>a</sup> | 1867.5 | 1867.5  | 1871.7 | 1866.3 | 1866.3  | 1868.7 |
| gdb 4520 | 1901.9 <sup>a</sup> | 1908.3 | 1908.3  | 1912.5 | 1906.5 | 1906.5  | 1909.5 |
| gdb 4521 | 1868.2 <sup>a</sup> | 1865.9 | 1865.9  | 1868.8 | 1860.3 | 1860.3  | 1864.1 |
| gdb 4522 | 1878.6 <sup>a</sup> | 1874.8 | 1874.8  | 1877.9 | 1872.9 | 1872.8  | 1874.9 |
| gdb 4523 | 1879.3 <sup>a</sup> | 1880.2 | 1880.2  | 1884.1 | 1877.7 | 1877.7  | 1880.5 |
| gdb 4524 | 1889.3 <sup>a</sup> | 1892.5 | 1892.5  | 1895.0 | 1885.7 | 1885.7  | 1890.0 |
| gdb 4525 | 1885.6 <sup>a</sup> | 1892.8 | 1892.8  | 1895.8 | 1887.6 | 1887.6  | 1891.5 |
| gdb 4526 | 1892.8 <sup>a</sup> | 1900.8 | 1900.8  | 1904.4 | 1898.9 | 1898.9  | 1901.4 |
| gdb 4527 | 1891.8 <sup>a</sup> | 1898.4 | 1898.4  | 1900.8 | 1896.5 | 1896.5  | 1898.8 |
| gdb 4528 | 1918.0 <sup>a</sup> | 1919.6 | 1919.6  | 1920.6 | 1920.1 | 1920.1  | 1919.9 |
| gdb 4529 | 1906.6 <sup>a</sup> | 1911.8 | 1911.8  | 1912.4 | 1908.7 | 1908.7  | 1910.4 |
| gdb 4530 | 1903.5 <sup>a</sup> | 1904.4 | 1904.4  | 1905.4 | 1903.0 | 1903.0  | 1905.9 |
| gdb 4531 | 1910.8 <sup>a</sup> | 1910.6 | 1910.6  | 1912.6 | 1912.8 | 1912.7  | 1913.9 |
| gdb 4532 | 1912.5 <sup>a</sup> | 1918.6 | 1918.6  | 1919.4 | 1919.1 | 1919.1  | 1918.7 |
| gdb 4533 | 1903.6 <sup>a</sup> | 1911.2 | 1911.2  | 1912.6 | 1908.9 | 1908.9  | 1910.6 |
| gdb 4534 | 1873.3 <sup>a</sup> | 1875.1 | 1875.0  | 1874.2 | 1867.4 | 1867.4  | 1866.4 |
| gdb 4535 | 1880.9 <sup>a</sup> | 1882.2 | 1882.1  | 1880.7 | 1877.4 | 1877.3  | 1874.3 |
| gdb 4536 | 1895.6 <sup>a</sup> | 1903.3 | 1903.2  | 1905.2 | 1902.4 | 1902.3  | 1905.4 |
| gdb 4537 | 1901.8 <sup>a</sup> | 1908.9 | 1908.9  | 1911.2 | 1911.6 | 1911.6  | 1912.9 |
| gdb 4538 | 1868.5 <sup>a</sup> | 1865.0 | 1864.9  | 1868.3 | 1859.6 | 1859.6  | 1863.6 |
| gdb 4539 | 1880.2 <sup>a</sup> | 1873.2 | 1873.1  | 1875.3 | 1871.8 | 1871.8  | 1873.4 |
| gdb 4540 | 1898.6 <sup>a</sup> | 1904.3 | 1904.3  | 1906.4 | 1902.3 | 1902.2  | 1905.1 |
| gdb 4541 | 1914.1 <sup>a</sup> | 1911.0 | 1911.0  | 1911.2 | 1908.4 | 1908.4  | 1911.0 |
| gdb 4542 | 1905.1 <sup>a</sup> | 1910.9 | 1910.9  | 1913.7 | 1912.6 | 1912.6  | 1914.1 |
| gdb 4543 | 1877.7 <sup>a</sup> | 1874.7 | 1874.7  | 1873.1 | 1866.1 | 1866.1  | 1865.4 |
| gdb 4544 | 1886.5 <sup>a</sup> | 1883.2 | 1883.2  | 1882.7 | 1878.0 | 1878.0  | 1875.5 |
| gdb 4545 | 1896.1 <sup>a</sup> | 1901.0 | 1900.9  | 1903.4 | 1899.2 | 1899.2  | 1902.8 |
| gdb 4546 | 1904.7 <sup>a</sup> | 1906.8 | 1906.8  | 1907.8 | 1908.4 | 1908.4  | 1909.9 |
| gdb 4547 | 1866.9 <sup>a</sup> | 1867.1 | 1867.1  | 1867.2 | 1859.2 | 1859.2  | 1859.7 |

... continued on next page ...

Table S73: ... continued from previous page ...

| Species  | Ref.                | OM2    | OM2-D3T | ODM2   | OM3    | OM3-D3T | ODM3   |
|----------|---------------------|--------|---------|--------|--------|---------|--------|
| gdb 4548 | 1880.0 <sup>a</sup> | 1878.2 | 1878.2  | 1877.3 | 1873.7 | 1873.6  | 1871.7 |
| gdb 4549 | 1899.6 <sup>a</sup> | 1906.2 | 1906.2  | 1907.5 | 1904.1 | 1904.0  | 1906.3 |
| gdb 4550 | 1908.1 <sup>a</sup> | 1912.2 | 1912.2  | 1914.7 | 1913.4 | 1913.4  | 1914.4 |
| gdb 4551 | 1916.7 <sup>a</sup> | 1927.7 | 1927.7  | 1927.9 | 1929.6 | 1929.6  | 1929.5 |
| gdb 4552 | 1911.6 <sup>a</sup> | 1907.7 | 1907.7  | 1908.7 | 1904.9 | 1904.9  | 1908.0 |
| gdb 4553 | 1895.9 <sup>a</sup> | 1901.4 | 1901.4  | 1903.5 | 1899.1 | 1899.1  | 1902.1 |
| gdb 4554 | 1898.7 <sup>a</sup> | 1904.9 | 1904.9  | 1906.2 | 1902.5 | 1902.5  | 1905.1 |
| gdb 4555 | 1903.0 <sup>a</sup> | 1908.2 | 1908.2  | 1910.5 | 1909.3 | 1909.3  | 1910.0 |
| gdb 4556 | 1869.5 <sup>a</sup> | 1870.6 | 1870.6  | 1872.3 | 1861.9 | 1861.9  | 1867.4 |
| gdb 4557 | 1867.6 <sup>a</sup> | 1869.7 | 1869.7  | 1870.9 | 1861.3 | 1861.2  | 1866.3 |
| gdb 4558 | 1864.2 <sup>a</sup> | 1864.7 | 1864.7  | 1867.4 | 1858.4 | 1858.4  | 1862.8 |
| gdb 4559 | 1871.1 <sup>a</sup> | 1873.1 | 1873.1  | 1874.4 | 1864.6 | 1864.6  | 1869.7 |
| gdb 4560 | 1871.3 <sup>a</sup> | 1872.5 | 1872.5  | 1876.5 | 1869.9 | 1869.9  | 1873.5 |
| gdb 4561 | 1872.2 <sup>a</sup> | 1871.9 | 1871.9  | 1876.7 | 1869.0 | 1869.0  | 1872.8 |
| gdb 4562 | 1900.2 <sup>a</sup> | 1902.0 | 1902.0  | 1903.7 | 1900.0 | 1900.0  | 1903.2 |
| gdb 4563 | 1903.0 <sup>a</sup> | 1904.3 | 1904.3  | 1905.2 | 1902.7 | 1902.7  | 1905.5 |
| gdb 4564 | 1909.4 <sup>a</sup> | 1910.1 | 1910.1  | 1911.9 | 1911.7 | 1911.7  | 1912.7 |
| gdb 4565 | 1869.9 <sup>a</sup> | 1876.0 | 1876.0  | 1879.0 | 1871.2 | 1871.2  | 1873.6 |
| gdb 4566 | 1873.1 <sup>a</sup> | 1880.7 | 1880.7  | 1884.3 | 1876.0 | 1875.9  | 1878.0 |
| gdb 4567 | 1870.2 <sup>a</sup> | 1877.5 | 1877.5  | 1880.8 | 1872.5 | 1872.5  | 1874.8 |
| gdb 4568 | 1872.4 <sup>a</sup> | 1878.3 | 1878.3  | 1881.0 | 1874.2 | 1874.1  | 1876.0 |
| gdb 4569 | 1870.3 <sup>a</sup> | 1879.4 | 1879.4  | 1881.6 | 1868.3 | 1868.3  | 1872.4 |
| gdb 4570 | 1878.1 <sup>a</sup> | 1887.1 | 1887.1  | 1889.8 | 1884.5 | 1884.4  | 1884.7 |
| gdb 4571 | 1867.1 <sup>a</sup> | 1873.0 | 1873.0  | 1875.6 | 1864.8 | 1864.8  | 1869.3 |
| gdb 4572 | 1871.5 <sup>a</sup> | 1875.6 | 1875.6  | 1878.4 | 1873.1 | 1873.1  | 1875.3 |
| gdb 4573 | 1868.5 <sup>a</sup> | 1871.5 | 1871.5  | 1875.8 | 1869.7 | 1869.7  | 1872.7 |
| gdb 4574 | 1896.3 <sup>a</sup> | 1901.7 | 1901.6  | 1903.2 | 1899.7 | 1899.7  | 1902.7 |
| gdb 4575 | 1898.6 <sup>a</sup> | 1904.9 | 1904.9  | 1905.7 | 1902.9 | 1902.8  | 1905.5 |
| gdb 4576 | 1911.5 <sup>a</sup> | 1911.8 | 1911.8  | 1912.5 | 1912.9 | 1912.9  | 1913.5 |
| gdb 4577 | 1896.8 <sup>a</sup> | 1901.5 | 1901.5  | 1903.1 | 1899.2 | 1899.1  | 1901.7 |
| gdb 4578 | 1899.4 <sup>a</sup> | 1903.3 | 1903.3  | 1904.2 | 1901.1 | 1901.1  | 1902.8 |
| gdb 4579 | 1908.2 <sup>a</sup> | 1910.7 | 1910.7  | 1913.1 | 1912.1 | 1912.1  | 1912.8 |
| gdb 4580 | 1878.4 <sup>a</sup> | 1878.1 | 1878.1  | 1880.9 | 1875.5 | 1875.5  | 1878.8 |
| gdb 4581 | 1867.2 <sup>a</sup> | 1868.5 | 1868.5  | 1871.0 | 1859.2 | 1859.2  | 1865.2 |
| gdb 4582 | 1864.3 <sup>a</sup> | 1864.9 | 1864.9  | 1867.9 | 1858.6 | 1858.6  | 1863.1 |
| gdb 4583 | 1871.6 <sup>a</sup> | 1871.5 | 1871.5  | 1873.9 | 1862.2 | 1862.1  | 1868.0 |
| gdb 4584 | 1869.9 <sup>a</sup> | 1871.5 | 1871.5  | 1874.2 | 1868.2 | 1868.2  | 1871.1 |
| gdb 4585 | 1872.4 <sup>a</sup> | 1872.0 | 1872.0  | 1876.9 | 1869.2 | 1869.2  | 1873.3 |
| gdb 4586 | 1873.7 <sup>a</sup> | 1873.7 | 1873.7  | 1877.1 | 1870.3 | 1870.2  | 1873.6 |
| gdb 4587 | 1874.6 <sup>a</sup> | 1883.7 | 1883.7  | 1885.4 | 1884.2 | 1884.2  | 1884.0 |
| gdb 4588 | 1878.0 <sup>a</sup> | 1886.7 | 1886.7  | 1889.3 | 1887.3 | 1887.3  | 1886.5 |
| gdb 4589 | 1873.2 <sup>a</sup> | 1881.4 | 1881.4  | 1883.0 | 1881.3 | 1881.3  | 1881.9 |
| gdb 4590 | 1877.5 <sup>a</sup> | 1884.9 | 1884.9  | 1886.4 | 1885.0 | 1885.0  | 1884.4 |
| gdb 4591 | 1877.3 <sup>a</sup> | 1885.9 | 1885.9  | 1887.9 | 1887.4 | 1887.1  | 1886.4 |
| gdb 4592 | 1880.4 <sup>a</sup> | 1887.6 | 1887.6  | 1889.3 | 1888.9 | 1888.9  | 1888.1 |
| gdb 4593 | 1849.4 <sup>a</sup> | 1850.1 | 1850.1  | 1849.1 | 1845.7 | 1845.8  | 1842.5 |
| gdb 4594 | 1849.7 <sup>a</sup> | 1852.1 | 1852.1  | 1851.3 | 1847.1 | 1847.1  | 1844.1 |
| gdb 4595 | 1851.4 <sup>a</sup> | 1858.5 | 1858.5  | 1861.3 | 1858.6 | 1858.6  | 1857.6 |
| gdb 4596 | 1870.6 <sup>a</sup> | 1877.5 | 1877.5  | 1879.3 | 1879.8 | 1879.8  | 1880.7 |
| gdb 4597 | 1885.5 <sup>a</sup> | 1884.1 | 1884.1  | 1885.1 | 1881.8 | 1881.3  | 1883.6 |
| gdb 4598 | 1872.2 <sup>a</sup> | 1880.6 | 1880.6  | 1882.6 | 1882.8 | 1882.8  | 1883.4 |
| gdb 4599 | 1872.3 <sup>a</sup> | 1877.1 | 1877.0  | 1879.1 | 1879.4 | 1879.4  | 1880.8 |
| gdb 4600 | 1859.8 <sup>a</sup> | 1866.6 | 1866.7  | 1867.2 | 1865.3 | 1865.3  | 1866.8 |
| gdb 4601 | 1870.1 <sup>a</sup> | 1877.3 | 1877.2  | 1879.0 | 1878.9 | 1878.8  | 1879.5 |
| gdb 4602 | 1854.6 <sup>a</sup> | 1854.2 | 1854.2  | 1856.5 | 1856.2 | 1856.2  | 1855.9 |
| gdb 4603 | 1854.3 <sup>a</sup> | 1854.6 | 1854.6  | 1857.0 | 1856.7 | 1856.7  | 1856.1 |
| gdb 4604 | 1855.3 <sup>a</sup> | 1852.2 | 1852.2  | 1851.7 | 1848.2 | 1848.2  | 1845.5 |
| gdb 4605 | 1855.9 <sup>a</sup> | 1852.8 | 1852.8  | 1856.1 | 1857.0 | 1857.0  | 1856.3 |
| gdb 4606 | 1852.5 <sup>a</sup> | 1854.8 | 1854.8  | 1857.6 | 1851.9 | 1851.9  | 1853.0 |
| gdb 4607 | 1850.0 <sup>a</sup> | 1851.5 | 1851.5  | 1854.3 | 1848.7 | 1848.7  | 1850.4 |
| gdb 4608 | 1851.1 <sup>a</sup> | 1853.0 | 1853.0  | 1855.8 | 1850.6 | 1850.6  | 1851.8 |
| gdb 4609 | 1857.6 <sup>a</sup> | 1867.0 | 1867.0  | 1870.1 | 1865.8 | 1865.8  | 1865.7 |
| gdb 4610 | 1852.1 <sup>a</sup> | 1849.2 | 1849.2  | 1848.7 | 1845.4 | 1845.3  | 1841.8 |
| gdb 4611 | 1850.2 <sup>a</sup> | 1848.7 | 1848.7  | 1847.7 | 1844.4 | 1844.4  | 1841.2 |
| gdb 4612 | 1843.4 <sup>a</sup> | 1844.1 | 1844.1  | 1846.2 | 1842.7 | 1842.6  | 1843.7 |

... continued on next page ...

Table S73: ... continued from previous page ...

| Species  | Ref.                | OM2    | OM2-D3T | ODM2   | OM3    | OM3-D3T | ODM3   |
|----------|---------------------|--------|---------|--------|--------|---------|--------|
| gdb 4613 | 1854.0 <sup>a</sup> | 1854.6 | 1854.6  | 1857.1 | 1855.8 | 1855.8  | 1855.3 |
| gdb 4614 | 1853.8 <sup>a</sup> | 1853.3 | 1853.3  | 1853.3 | 1855.7 | 1856.0  | 1855.6 |
| gdb 4615 | 1856.1 <sup>a</sup> | 1852.9 | 1852.9  | 1855.8 | 1856.2 | 1856.2  | 1855.8 |
| gdb 4616 | 1852.3 <sup>a</sup> | 1853.2 | 1853.1  | 1856.2 | 1851.2 | 1851.1  | 1852.6 |
| gdb 4617 | 1857.5 <sup>a</sup> | 1863.5 | 1863.4  | 1868.0 | 1864.3 | 1864.2  | 1865.3 |
| gdb 4618 | 1855.3 <sup>a</sup> | 1852.4 | 1852.4  | 1851.8 | 1848.5 | 1848.5  | 1845.8 |
| gdb 4619 | 1857.6 <sup>a</sup> | 1855.6 | 1855.6  | 1858.3 | 1858.4 | 1858.4  | 1858.2 |
| gdb 4620 | 1850.7 <sup>a</sup> | 1847.7 | 1847.7  | 1847.6 | 1844.5 | 1844.5  | 1841.8 |
| gdb 4621 | 1849.7 <sup>a</sup> | 1848.1 | 1848.1  | 1847.2 | 1844.7 | 1844.7  | 1841.5 |
| gdb 4622 | 1842.9 <sup>a</sup> | 1843.3 | 1843.3  | 1845.1 | 1842.5 | 1842.5  | 1843.5 |
| gdb 4623 | 1852.6 <sup>a</sup> | 1853.4 | 1853.4  | 1856.1 | 1855.3 | 1855.3  | 1854.8 |
| gdb 4624 | 1849.4 <sup>a</sup> | 1851.2 | 1851.2  | 1854.0 | 1849.1 | 1849.1  | 1850.5 |
| gdb 4625 | 1852.5 <sup>a</sup> | 1852.2 | 1852.2  | 1855.1 | 1850.4 | 1850.4  | 1852.0 |
| gdb 4626 | 1852.1 <sup>a</sup> | 1852.5 | 1852.5  | 1855.4 | 1850.2 | 1850.2  | 1851.3 |
| gdb 4627 | 1857.8 <sup>a</sup> | 1863.2 | 1863.2  | 1867.8 | 1863.9 | 1863.9  | 1864.7 |
| gdb 4628 | 1864.0 <sup>a</sup> | 1873.3 | 1873.3  | 1875.0 | 1865.2 | 1865.2  | 1868.0 |
| gdb 4629 | 1863.6 <sup>a</sup> | 1874.6 | 1874.6  | 1876.4 | 1866.2 | 1866.2  | 1868.7 |
| gdb 4630 | 1865.3 <sup>a</sup> | 1874.0 | 1874.0  | 1876.6 | 1872.0 | 1872.0  | 1873.0 |
| gdb 4631 | 1865.2 <sup>a</sup> | 1872.0 | 1872.0  | 1874.6 | 1870.6 | 1870.5  | 1871.6 |
| gdb 4632 | 1879.4 <sup>a</sup> | 1883.1 | 1883.1  | 1885.0 | 1885.8 | 1885.7  | 1885.5 |
| gdb 4633 | 1886.7 <sup>a</sup> | 1884.3 | 1884.3  | 1885.1 | 1883.2 | 1883.2  | 1885.6 |
| gdb 4634 | 1875.9 <sup>a</sup> | 1883.2 | 1883.1  | 1885.0 | 1885.4 | 1885.4  | 1885.1 |
| gdb 4635 | 1871.3 <sup>a</sup> | 1877.3 | 1876.9  | 1879.4 | 1879.6 | 1879.3  | 1880.6 |
| gdb 4636 | 1875.2 <sup>a</sup> | 1880.9 | 1880.8  | 1882.1 | 1882.9 | 1882.9  | 1883.0 |
| gdb 4637 | 1852.5 <sup>a</sup> | 1850.8 | 1850.8  | 1849.9 | 1847.4 | 1847.3  | 1844.5 |
| gdb 4638 | 1853.8 <sup>a</sup> | 1855.5 | 1855.5  | 1858.1 | 1857.5 | 1857.5  | 1857.2 |
| gdb 4639 | 1851.8 <sup>a</sup> | 1850.0 | 1850.0  | 1849.3 | 1847.4 | 1847.3  | 1844.5 |
| gdb 4640 | 1851.8 <sup>a</sup> | 1852.8 | 1852.8  | 1855.2 | 1856.1 | 1856.1  | 1855.7 |
| gdb 4641 | 1849.3 <sup>a</sup> | 1848.2 | 1848.2  | 1851.2 | 1847.5 | 1847.4  | 1849.1 |
| gdb 4642 | 1847.1 <sup>a</sup> | 1846.4 | 1846.4  | 1849.8 | 1845.5 | 1845.5  | 1847.4 |
| gdb 4643 | 1877.3 <sup>a</sup> | 1884.0 | 1884.0  | 1885.3 | 1886.5 | 1886.5  | 1886.2 |
| gdb 4644 | 1888.8 <sup>a</sup> | 1887.7 | 1887.7  | 1888.9 | 1886.6 | 1886.6  | 1887.6 |
| gdb 4645 | 1848.1 <sup>a</sup> | 1847.8 | 1847.8  | 1846.8 | 1844.7 | 1844.7  | 1841.6 |
| gdb 4646 | 1839.8 <sup>a</sup> | 1843.1 | 1843.1  | 1844.0 | 1842.5 | 1842.5  | 1843.1 |
| gdb 4647 | 1885.2 <sup>a</sup> | 1880.2 | 1879.9  | 1881.1 | 1878.6 | 1878.6  | 1881.7 |
| gdb 4648 | 1859.8 <sup>a</sup> | 1866.3 | 1866.3  | 1866.3 | 1866.0 | 1866.0  | 1867.4 |
| gdb 4649 | 1869.3 <sup>a</sup> | 1875.0 | 1875.0  | 1876.6 | 1878.6 | 1878.6  | 1879.2 |
| gdb 4650 | 1875.5 <sup>a</sup> | 1883.6 | 1883.6  | 1885.6 | 1884.7 | 1884.6  | 1884.5 |
| gdb 4651 | 1876.9 <sup>a</sup> | 1886.9 | 1886.9  | 1887.6 | 1887.3 | 1887.3  | 1886.2 |
| gdb 4652 | 1885.5 <sup>a</sup> | 1882.1 | 1882.1  | 1883.4 | 1879.9 | 1879.9  | 1882.3 |
| gdb 4653 | 1897.3 <sup>a</sup> | 1907.8 | 1907.7  | 1907.3 | 1908.5 | 1908.3  | 1906.4 |
| gdb 4654 | 1879.5 <sup>a</sup> | 1884.8 | 1884.8  | 1887.4 | 1883.5 | 1883.5  | 1884.4 |
| gdb 4655 | 1878.5 <sup>a</sup> | 1889.0 | 1889.0  | 1890.6 | 1887.3 | 1887.3  | 1887.2 |
| gdb 4656 | 1887.2 <sup>a</sup> | 1886.8 | 1886.8  | 1888.1 | 1881.4 | 1881.4  | 1884.4 |
| gdb 4657 | 1881.3 <sup>a</sup> | 1885.5 | 1885.5  | 1887.6 | 1887.0 | 1887.0  | 1886.9 |
| gdb 4658 | 1878.3 <sup>a</sup> | 1886.5 | 1886.5  | 1888.7 | 1887.3 | 1887.2  | 1886.7 |
| gdb 4659 | 1889.3 <sup>a</sup> | 1887.6 | 1887.6  | 1888.5 | 1885.2 | 1885.2  | 1887.1 |
| gdb 4660 | 1876.4 <sup>a</sup> | 1882.2 | 1882.2  | 1885.0 | 1882.1 | 1882.0  | 1883.5 |
| gdb 4661 | 1876.9 <sup>a</sup> | 1881.3 | 1881.2  | 1882.8 | 1881.8 | 1881.7  | 1881.9 |
| gdb 4662 | 1887.6 <sup>a</sup> | 1883.8 | 1883.8  | 1885.5 | 1880.7 | 1880.7  | 1883.8 |
| gdb 4663 | 1899.0 <sup>a</sup> | 1906.7 | 1906.7  | 1906.7 | 1907.5 | 1907.4  | 1906.9 |
| gdb 4664 | 1855.8 <sup>a</sup> | 1847.2 | 1847.1  | 1848.1 | 1845.4 | 1845.3  | 1844.1 |
| gdb 4665 | 1876.2 <sup>a</sup> | 1855.0 | 1855.0  | 1857.8 | 1853.3 | 1853.3  | 1856.5 |
| gdb 4666 | 1863.3 <sup>a</sup> | 1851.5 | 1851.5  | 1855.4 | 1853.8 | 1853.8  | 1855.2 |
| gdb 4667 | 1871.3 <sup>a</sup> | 1864.4 | 1864.3  | 1866.1 | 1864.6 | 1864.6  | 1865.1 |
| gdb 4668 | 1869.4 <sup>a</sup> | 1863.5 | 1863.5  | 1865.1 | 1863.2 | 1863.2  | 1864.1 |
| gdb 4669 | 1874.1 <sup>a</sup> | 1873.5 | 1873.5  | 1871.9 | 1869.2 | 1869.0  | 1865.7 |
| gdb 4670 | 1889.3 <sup>a</sup> | 1880.2 | 1880.2  | 1881.5 | 1877.8 | 1877.8  | 1879.9 |
| gdb 4671 | 1881.2 <sup>a</sup> | 1879.1 | 1879.1  | 1881.3 | 1880.5 | 1880.5  | 1880.2 |
| gdb 4672 | 1897.7 <sup>a</sup> | 1906.7 | 1906.7  | 1907.9 | 1905.0 | 1905.0  | 1906.3 |
| gdb 4673 | 1916.4 <sup>a</sup> | 1913.8 | 1913.8  | 1914.9 | 1911.4 | 1911.4  | 1913.4 |
| gdb 4674 | 1907.2 <sup>a</sup> | 1912.3 | 1912.3  | 1913.7 | 1913.9 | 1913.9  | 1913.5 |
| gdb 4675 | 1851.4 <sup>a</sup> | 1845.2 | 1845.1  | 1846.2 | 1843.7 | 1843.7  | 1843.3 |
| gdb 4676 | 1873.6 <sup>a</sup> | 1854.3 | 1854.3  | 1858.2 | 1853.0 | 1853.0  | 1857.3 |
| gdb 4677 | 1860.7 <sup>a</sup> | 1849.8 | 1849.8  | 1854.5 | 1853.3 | 1853.2  | 1855.5 |

... continued on next page ...

Table S73: ... continued from previous page ...

| Species  | Ref.                | OM2    | OM2-D3T | ODM2   | OM3    | OM3-D3T | ODM3   |
|----------|---------------------|--------|---------|--------|--------|---------|--------|
| gdb 4678 | 1869.3 <sup>a</sup> | 1862.0 | 1862.0  | 1864.0 | 1862.2 | 1862.2  | 1863.2 |
| gdb 4679 | 1886.7 <sup>a</sup> | 1878.0 | 1878.0  | 1878.0 | 1880.0 | 1876.5  | 1879.1 |
| gdb 4680 | 1875.0 <sup>a</sup> | 1875.9 | 1875.9  | 1878.6 | 1878.1 | 1878.1  | 1878.3 |
| gdb 4681 | 1902.3 <sup>a</sup> | 1911.0 | 1911.0  | 1912.3 | 1913.9 | 1913.8  | 1914.4 |
| gdb 4682 | 1899.1 <sup>a</sup> | 1907.2 | 1907.2  | 1907.3 | 1909.2 | 1909.2  | 1908.1 |
| gdb 4683 | 1872.1 <sup>a</sup> | 1871.1 | 1871.1  | 1869.8 | 1867.5 | 1867.4  | 1864.9 |
| gdb 4684 | 1866.6 <sup>a</sup> | 1862.2 | 1862.1  | 1864.2 | 1862.5 | 1862.0  | 1863.1 |
| gdb 4685 | 1885.8 <sup>a</sup> | 1878.8 | 1878.8  | 1880.3 | 1876.5 | 1876.5  | 1879.0 |
| gdb 4686 | 1873.4 <sup>a</sup> | 1874.2 | 1874.2  | 1876.7 | 1876.4 | 1876.3  | 1876.9 |
| gdb 4687 | 1914.3 <sup>a</sup> | 1913.0 | 1913.0  | 1913.7 | 1910.4 | 1910.3  | 1913.0 |
| gdb 4688 | 1904.4 <sup>a</sup> | 1909.1 | 1909.0  | 1911.0 | 1910.4 | 1910.3  | 1911.1 |
| gdb 4689 | 1902.3 <sup>a</sup> | 1911.9 | 1911.9  | 1913.2 | 1914.0 | 1913.9  | 1914.6 |
| gdb 4690 | 1898.4 <sup>a</sup> | 1907.3 | 1907.2  | 1909.0 | 1905.2 | 1905.1  | 1906.9 |
| gdb 4691 | 1914.1 <sup>a</sup> | 1913.1 | 1913.1  | 1913.7 | 1910.3 | 1910.3  | 1912.8 |
| gdb 4692 | 1900.8 <sup>a</sup> | 1907.1 | 1907.1  | 1909.0 | 1908.9 | 1908.9  | 1909.8 |
| gdb 4693 | 1873.3 <sup>a</sup> | 1879.0 | 1879.0  | 1881.4 | 1879.5 | 1879.4  | 1880.4 |
| gdb 4694 | 1875.8 <sup>a</sup> | 1882.9 | 1882.9  | 1885.4 | 1883.6 | 1883.6  | 1884.2 |
| gdb 4695 | 1888.3 <sup>a</sup> | 1888.7 | 1888.7  | 1889.3 | 1885.2 | 1885.2  | 1887.0 |
| gdb 4696 | 1887.3 <sup>a</sup> | 1883.2 | 1883.2  | 1884.9 | 1880.5 | 1880.5  | 1883.7 |
| gdb 4697 | 1877.4 <sup>a</sup> | 1882.2 | 1882.2  | 1883.8 | 1885.2 | 1885.2  | 1885.0 |
| gdb 4698 | 1889.4 <sup>a</sup> | 1888.1 | 1888.1  | 1888.4 | 1886.5 | 1886.4  | 1888.0 |
| gdb 4699 | 1890.3 <sup>a</sup> | 1886.2 | 1886.2  | 1887.8 | 1885.1 | 1885.1  | 1887.2 |
| gdb 4700 | 1863.4 <sup>a</sup> | 1869.2 | 1869.2  | 1869.1 | 1867.5 | 1867.5  | 1869.0 |
| gdb 4701 | 1888.4 <sup>a</sup> | 1884.8 | 1884.8  | 1886.5 | 1882.5 | 1882.5  | 1885.4 |
| gdb 4702 | 1886.1 <sup>a</sup> | 1881.2 | 1881.1  | 1883.0 | 1879.4 | 1879.3  | 1882.9 |
| gdb 4703 | 1873.2 <sup>a</sup> | 1877.1 | 1877.1  | 1879.1 | 1879.4 | 1879.3  | 1880.0 |
| gdb 4704 | 1874.5 <sup>a</sup> | 1879.7 | 1879.6  | 1882.4 | 1880.4 | 1880.3  | 1881.4 |
| gdb 4705 | 1864.3 <sup>a</sup> | 1872.6 | 1872.6  | 1873.5 | 1869.0 | 1869.0  | 1870.8 |
| gdb 4706 | 1872.7 <sup>a</sup> | 1877.9 | 1877.9  | 1880.1 | 1878.7 | 1878.6  | 1879.4 |
| gdb 4707 | 1885.1 <sup>a</sup> | 1882.2 | 1882.2  | 1883.7 | 1878.9 | 1878.9  | 1881.9 |
| gdb 4708 | 1871.9 <sup>a</sup> | 1875.5 | 1875.5  | 1878.5 | 1876.1 | 1876.1  | 1878.5 |
| gdb 4709 | 1872.3 <sup>a</sup> | 1878.0 | 1878.0  | 1880.1 | 1877.7 | 1877.7  | 1879.3 |
| gdb 4710 | 1861.9 <sup>a</sup> | 1868.6 | 1868.6  | 1870.0 | 1864.9 | 1864.9  | 1868.1 |
| gdb 4711 | 1853.1 <sup>a</sup> | 1849.2 | 1849.2  | 1849.2 | 1844.0 | 1844.0  | 1842.4 |
| gdb 4712 | 1842.4 <sup>a</sup> | 1841.3 | 1841.3  | 1839.9 | 1831.6 | 1831.6  | 1831.0 |
| gdb 4713 | 1845.2 <sup>a</sup> | 1845.7 | 1845.6  | 1847.7 | 1842.9 | 1842.9  | 1844.6 |
| gdb 4714 | 1856.6 <sup>a</sup> | 1855.2 | 1855.2  | 1858.7 | 1856.4 | 1856.4  | 1857.2 |
| gdb 4715 | 1852.5 <sup>a</sup> | 1848.6 | 1848.6  | 1848.8 | 1844.3 | 1844.3  | 1842.6 |
| gdb 4716 | 1842.4 <sup>a</sup> | 1843.4 | 1843.4  | 1845.4 | 1841.2 | 1841.2  | 1843.2 |
| gdb 4717 | 1841.0 <sup>a</sup> | 1840.9 | 1840.9  | 1839.6 | 1832.1 | 1832.1  | 1831.3 |
| gdb 4718 | 1853.2 <sup>a</sup> | 1851.4 | 1851.4  | 1854.8 | 1853.2 | 1853.2  | 1854.2 |
| gdb 4719 | 1839.4 <sup>a</sup> | 1838.8 | 1838.7  | 1841.4 | 1831.9 | 1831.9  | 1835.9 |
| gdb 4720 | 1838.4 <sup>a</sup> | 1837.2 | 1837.2  | 1839.8 | 1830.7 | 1830.7  | 1835.1 |
| gdb 4721 | 1849.9 <sup>a</sup> | 1846.1 | 1846.1  | 1850.2 | 1843.9 | 1843.9  | 1847.1 |
| gdb 4722 | 1846.4 <sup>a</sup> | 1842.5 | 1842.5  | 1846.7 | 1840.6 | 1840.6  | 1844.3 |
| gdb 4723 | 1882.7 <sup>a</sup> | 1888.5 | 1888.5  | 1890.6 | 1889.7 | 1889.7  | 1889.7 |
| gdb 4724 | 1866.7 <sup>a</sup> | 1878.2 | 1878.2  | 1878.9 | 1875.8 | 1875.8  | 1873.8 |
| gdb 4725 | 1853.2 <sup>a</sup> | 1852.1 | 1852.0  | 1851.7 | 1847.8 | 1847.7  | 1844.8 |
| gdb 4726 | 1841.4 <sup>a</sup> | 1842.7 | 1842.7  | 1840.8 | 1834.4 | 1834.4  | 1832.6 |
| gdb 4727 | 1879.4 <sup>a</sup> | 1886.0 | 1886.0  | 1888.6 | 1884.4 | 1884.4  | 1885.6 |
| gdb 4728 | 1881.2 <sup>a</sup> | 1888.5 | 1888.5  | 1890.1 | 1886.6 | 1886.5  | 1886.4 |
| gdb 4729 | 1867.2 <sup>a</sup> | 1877.4 | 1877.4  | 1879.1 | 1872.6 | 1872.5  | 1874.9 |
| gdb 4730 | 1851.2 <sup>a</sup> | 1850.3 | 1850.2  | 1850.2 | 1843.3 | 1843.3  | 1841.5 |
| gdb 4731 | 1850.5 <sup>a</sup> | 1853.5 | 1853.5  | 1852.6 | 1845.9 | 1845.8  | 1842.9 |
| gdb 4732 | 1838.0 <sup>a</sup> | 1841.0 | 1841.0  | 1840.2 | 1830.9 | 1830.9  | 1830.0 |
| gdb 4733 | 1855.7 <sup>a</sup> | 1860.3 | 1860.3  | 1863.1 | 1858.3 | 1858.3  | 1858.0 |
| gdb 4734 | 1874.5 <sup>a</sup> | 1880.5 | 1880.5  | 1882.6 | 1880.8 | 1880.8  | 1881.6 |
| gdb 4735 | 1873.3 <sup>a</sup> | 1884.3 | 1884.3  | 1883.1 | 1882.0 | 1882.0  | 1882.2 |
| gdb 4736 | 1861.3 <sup>a</sup> | 1871.3 | 1871.3  | 1872.9 | 1868.5 | 1868.5  | 1870.4 |
| gdb 4737 | 1874.6 <sup>a</sup> | 1881.6 | 1881.6  | 1884.4 | 1879.8 | 1879.8  | 1881.2 |
| gdb 4738 | 1877.1 <sup>a</sup> | 1886.7 | 1886.7  | 1888.9 | 1884.7 | 1884.6  | 1885.2 |
| gdb 4739 | 1864.3 <sup>a</sup> | 1874.2 | 1874.2  | 1876.1 | 1869.6 | 1869.5  | 1871.9 |
| gdb 4740 | 1876.7 <sup>a</sup> | 1882.6 | 1882.6  | 1884.6 | 1882.6 | 1882.6  | 1883.5 |
| gdb 4741 | 1878.3 <sup>a</sup> | 1884.9 | 1884.9  | 1886.1 | 1884.6 | 1884.6  | 1884.3 |
| gdb 4742 | 1865.6 <sup>a</sup> | 1873.9 | 1873.9  | 1875.8 | 1870.8 | 1870.7  | 1873.3 |

... continued on next page ...

Table S73: ... continued from previous page ...

| Species  | Ref.                | OM2    | OM2-D3T | ODM2   | OM3    | OM3-D3T | ODM3   |
|----------|---------------------|--------|---------|--------|--------|---------|--------|
| gdb 4743 | 1873.8 <sup>a</sup> | 1876.6 | 1876.6  | 1878.2 | 1876.1 | 1876.0  | 1877.9 |
| gdb 4744 | 1877.4 <sup>a</sup> | 1879.8 | 1879.8  | 1882.2 | 1879.8 | 1879.8  | 1881.1 |
| gdb 4745 | 1862.5 <sup>a</sup> | 1868.3 | 1868.3  | 1870.3 | 1865.0 | 1864.9  | 1868.3 |
| gdb 4746 | 1873.7 <sup>a</sup> | 1878.0 | 1878.0  | 1880.8 | 1877.8 | 1877.8  | 1880.1 |
| gdb 4747 | 1883.5 <sup>a</sup> | 1883.7 | 1883.7  | 1885.6 | 1878.8 | 1878.8  | 1882.8 |
| gdb 4748 | 1873.9 <sup>a</sup> | 1881.9 | 1881.9  | 1883.8 | 1881.3 | 1881.3  | 1882.6 |
| gdb 4749 | 1861.1 <sup>a</sup> | 1868.6 | 1868.6  | 1870.5 | 1865.3 | 1865.2  | 1868.7 |
| gdb 4750 | 1879.1 <sup>a</sup> | 1885.7 | 1885.7  | 1887.6 | 1887.3 | 1887.3  | 1887.0 |
| gdb 4751 | 1877.3 <sup>a</sup> | 1886.9 | 1886.9  | 1889.0 | 1887.9 | 1887.9  | 1887.4 |
| gdb 4752 | 1866.3 <sup>a</sup> | 1875.5 | 1875.4  | 1876.0 | 1873.7 | 1873.7  | 1874.6 |
| gdb 4753 | 1850.2 <sup>a</sup> | 1848.4 | 1848.3  | 1847.7 | 1844.4 | 1844.4  | 1841.5 |
| gdb 4754 | 1848.6 <sup>a</sup> | 1849.9 | 1849.9  | 1849.4 | 1845.4 | 1845.4  | 1842.2 |
| gdb 4755 | 1837.2 <sup>a</sup> | 1837.9 | 1837.9  | 1835.8 | 1830.6 | 1830.6  | 1828.9 |
| gdb 4756 | 1856.1 <sup>a</sup> | 1857.9 | 1857.9  | 1861.1 | 1858.8 | 1858.8  | 1857.9 |
| gdb 4757 | 1873.7 <sup>a</sup> | 1878.5 | 1878.5  | 1880.5 | 1881.2 | 1881.2  | 1882.1 |
| gdb 4758 | 1872.3 <sup>a</sup> | 1880.2 | 1880.2  | 1882.4 | 1882.4 | 1882.4  | 1882.9 |
| gdb 4759 | 1861.1 <sup>a</sup> | 1868.5 | 1868.5  | 1869.1 | 1867.8 | 1867.8  | 1869.8 |
| gdb 4760 | 1880.2 <sup>a</sup> | 1886.3 | 1886.3  | 1888.4 | 1887.0 | 1887.0  | 1886.7 |
| gdb 4761 | 1881.9 <sup>a</sup> | 1886.3 | 1886.2  | 1888.6 | 1887.2 | 1887.2  | 1886.6 |
| gdb 4762 | 1868.7 <sup>a</sup> | 1875.9 | 1875.9  | 1876.6 | 1873.2 | 1873.2  | 1874.2 |
| gdb 4763 | 1877.5 <sup>a</sup> | 1881.9 | 1881.9  | 1884.5 | 1882.3 | 1882.3  | 1883.4 |
| gdb 4764 | 1879.0 <sup>a</sup> | 1882.5 | 1882.5  | 1885.4 | 1883.1 | 1883.0  | 1883.9 |
| gdb 4765 | 1865.7 <sup>a</sup> | 1871.5 | 1871.5  | 1872.7 | 1868.6 | 1868.5  | 1870.9 |
| gdb 4766 | 1868.4 <sup>a</sup> | 1873.0 | 1873.0  | 1876.3 | 1873.6 | 1873.6  | 1876.4 |
| gdb 4767 | 1870.4 <sup>a</sup> | 1875.7 | 1875.7  | 1879.2 | 1876.4 | 1876.4  | 1878.7 |
| gdb 4768 | 1861.0 <sup>a</sup> | 1866.7 | 1866.7  | 1868.2 | 1863.8 | 1863.8  | 1867.4 |
| gdb 4769 | 1851.6 <sup>a</sup> | 1847.9 | 1847.9  | 1848.3 | 1842.1 | 1842.1  | 1840.4 |
| gdb 4770 | 1852.3 <sup>a</sup> | 1849.5 | 1849.5  | 1849.9 | 1843.5 | 1843.5  | 1841.3 |
| gdb 4771 | 1842.1 <sup>a</sup> | 1838.7 | 1838.7  | 1837.7 | 1829.5 | 1829.4  | 1829.0 |
| gdb 4772 | 1858.5 <sup>a</sup> | 1856.1 | 1856.1  | 1860.2 | 1856.1 | 1856.0  | 1856.7 |
| gdb 4773 | 1850.7 <sup>a</sup> | 1847.0 | 1847.0  | 1847.5 | 1842.1 | 1842.1  | 1840.4 |
| gdb 4774 | 1850.4 <sup>a</sup> | 1847.9 | 1847.9  | 1848.3 | 1843.1 | 1843.1  | 1840.9 |
| gdb 4775 | 1841.7 <sup>a</sup> | 1838.2 | 1838.1  | 1837.2 | 1829.9 | 1829.8  | 1829.4 |
| gdb 4776 | 1857.2 <sup>a</sup> | 1854.1 | 1854.1  | 1855.5 | 1854.3 | 1854.3  | 1854.0 |
| gdb 4777 | 1871.7 <sup>a</sup> | 1875.6 | 1875.6  | 1877.9 | 1878.3 | 1878.3  | 1879.2 |
| gdb 4778 | 1871.9 <sup>a</sup> | 1876.7 | 1876.7  | 1879.4 | 1879.7 | 1879.7  | 1880.5 |
| gdb 4779 | 1863.1 <sup>a</sup> | 1868.6 | 1868.6  | 1869.3 | 1867.5 | 1867.5  | 1869.5 |
| gdb 4780 | 1873.3 <sup>a</sup> | 1878.3 | 1878.3  | 1879.8 | 1878.5 | 1878.5  | 1879.3 |
| gdb 4781 | 1885.4 <sup>a</sup> | 1881.7 | 1881.7  | 1883.2 | 1878.8 | 1878.7  | 1881.6 |
| gdb 4782 | 1876.9 <sup>a</sup> | 1881.8 | 1881.8  | 1883.6 | 1882.3 | 1882.2  | 1882.5 |
| gdb 4783 | 1863.8 <sup>a</sup> | 1870.9 | 1870.9  | 1872.6 | 1868.3 | 1868.2  | 1871.1 |
| gdb 4784 | 1870.5 <sup>a</sup> | 1874.5 | 1874.5  | 1877.7 | 1875.5 | 1875.5  | 1878.1 |
| gdb 4785 | 1869.7 <sup>a</sup> | 1876.6 | 1876.6  | 1879.9 | 1877.0 | 1877.0  | 1879.2 |
| gdb 4786 | 1861.5 <sup>a</sup> | 1866.5 | 1866.5  | 1868.2 | 1863.4 | 1863.4  | 1866.7 |
| gdb 4787 | 1877.9 <sup>a</sup> | 1882.3 | 1882.3  | 1885.0 | 1883.0 | 1882.9  | 1884.3 |
| gdb 4788 | 1867.5 <sup>a</sup> | 1872.9 | 1872.9  | 1874.3 | 1870.3 | 1870.2  | 1872.7 |
| gdb 4789 | 1839.7 <sup>a</sup> | 1837.8 | 1837.7  | 1836.6 | 1829.6 | 1829.6  | 1829.0 |
| gdb 4790 | 1849.2 <sup>a</sup> | 1846.4 | 1846.4  | 1846.7 | 1841.8 | 1841.7  | 1840.2 |
| gdb 4791 | 1875.3 <sup>a</sup> | 1879.2 | 1879.2  | 1881.4 | 1881.5 | 1881.4  | 1882.4 |
| gdb 4792 | 1864.3 <sup>a</sup> | 1868.9 | 1868.9  | 1870.0 | 1868.0 | 1867.9  | 1870.1 |
| gdb 4793 | 1877.3 <sup>a</sup> | 1881.2 | 1881.2  | 1883.7 | 1882.7 | 1882.6  | 1884.0 |
| gdb 4794 | 1888.6 <sup>a</sup> | 1888.3 | 1888.3  | 1889.3 | 1885.2 | 1885.2  | 1887.9 |
| gdb 4795 | 1862.1 <sup>a</sup> | 1875.2 | 1871.0  | 1876.5 | 1872.5 | 1872.4  | 1871.4 |
| gdb 4796 | 1873.5 <sup>a</sup> | 1877.6 | 1877.6  | 1880.4 | 1876.1 | 1876.1  | 1877.9 |
| gdb 4797 | 1858.9 <sup>a</sup> | 1869.3 | 1869.3  | 1871.1 | 1861.7 | 1861.7  | 1864.6 |
| gdb 4798 | 1869.8 <sup>a</sup> | 1874.3 | 1874.3  | 1876.6 | 1876.9 | 1876.9  | 1877.8 |
| gdb 4799 | 1860.8 <sup>a</sup> | 1868.8 | 1868.8  | 1869.4 | 1866.7 | 1866.6  | 1868.3 |
| gdb 4800 | 1871.8 <sup>a</sup> | 1878.5 | 1878.5  | 1881.4 | 1878.3 | 1878.2  | 1879.4 |
| gdb 4801 | 1863.0 <sup>a</sup> | 1869.6 | 1869.6  | 1870.8 | 1865.7 | 1865.7  | 1867.7 |
| gdb 4802 | 1835.0 <sup>a</sup> | 1835.7 | 1835.7  | 1834.7 | 1828.0 | 1827.9  | 1827.7 |
| gdb 4803 | 1849.7 <sup>a</sup> | 1846.3 | 1846.2  | 1846.2 | 1841.9 | 1841.9  | 1840.2 |
| gdb 4804 | 1844.0 <sup>a</sup> | 1845.8 | 1845.8  | 1848.1 | 1843.4 | 1843.4  | 1845.2 |
| gdb 4805 | 1874.4 <sup>a</sup> | 1878.2 | 1878.2  | 1879.1 | 1880.8 | 1880.8  | 1881.5 |
| gdb 4806 | 1886.3 <sup>a</sup> | 1884.1 | 1884.1  | 1884.8 | 1881.7 | 1881.7  | 1884.7 |
| gdb 4807 | 1864.1 <sup>a</sup> | 1871.5 | 1871.5  | 1872.3 | 1870.2 | 1870.2  | 1872.4 |

... continued on next page ...

Table S73: ... continued from previous page ...

| Species  | Ref.                | OM2    | OM2-D3T | ODM2   | OM3    | OM3-D3T | ODM3   |
|----------|---------------------|--------|---------|--------|--------|---------|--------|
| gdb 4808 | 1885.2 <sup>a</sup> | 1879.5 | 1879.5  | 1881.3 | 1877.0 | 1877.0  | 1880.8 |
| gdb 4809 | 1860.9 <sup>a</sup> | 1866.2 | 1866.2  | 1866.2 | 1868.0 | 1865.0  | 1868.7 |
| gdb 4810 | 1871.3 <sup>a</sup> | 1873.2 | 1873.1  | 1874.7 | 1874.8 | 1874.8  | 1876.6 |
| gdb 4811 | 1859.7 <sup>a</sup> | 1864.6 | 1864.6  | 1865.3 | 1862.6 | 1862.6  | 1865.2 |
| gdb 4812 | 1861.1 <sup>a</sup> | 1865.0 | 1865.0  | 1866.4 | 1863.3 | 1863.2  | 1866.2 |
| gdb 4813 | 1869.8 <sup>a</sup> | 1872.7 | 1872.7  | 1874.1 | 1874.1 | 1874.0  | 1875.6 |
| gdb 4814 | 1882.9 <sup>a</sup> | 1876.8 | 1876.8  | 1878.7 | 1874.0 | 1873.8  | 1877.9 |
| gdb 4815 | 1861.3 <sup>a</sup> | 1868.6 | 1868.6  | 1869.1 | 1866.0 | 1865.9  | 1868.6 |
| gdb 4816 | 1860.2 <sup>a</sup> | 1866.3 | 1866.3  | 1867.6 | 1864.5 | 1864.5  | 1867.6 |
| gdb 4817 | 1871.0 <sup>a</sup> | 1873.5 | 1873.5  | 1876.2 | 1875.8 | 1875.8  | 1877.9 |
| gdb 4818 | 1856.8 <sup>a</sup> | 1852.0 | 1852.0  | 1854.0 | 1852.7 | 1852.7  | 1853.2 |
| gdb 4819 | 1853.9 <sup>a</sup> | 1848.7 | 1848.6  | 1851.5 | 1850.8 | 1850.8  | 1851.7 |
| gdb 4820 | 1843.7 <sup>a</sup> | 1839.8 | 1839.8  | 1842.3 | 1838.1 | 1838.1  | 1840.4 |
| gdb 4821 | 1856.4 <sup>a</sup> | 1851.5 | 1851.5  | 1854.6 | 1852.8 | 1852.8  | 1854.0 |
| gdb 4822 | 1857.6 <sup>a</sup> | 1852.2 | 1852.2  | 1855.4 | 1853.9 | 1853.9  | 1854.7 |
| gdb 4823 | 1858.5 <sup>a</sup> | 1850.9 | 1850.9  | 1854.6 | 1853.1 | 1853.0  | 1853.9 |
| gdb 4824 | 1845.9 <sup>a</sup> | 1839.5 | 1839.5  | 1843.1 | 1838.2 | 1838.2  | 1841.2 |
| gdb 4825 | 1845.2 <sup>a</sup> | 1830.2 | 1830.2  | 1833.8 | 1829.4 | 1829.4  | 1831.1 |
| gdb 4826 | 1846.2 <sup>a</sup> | 1831.8 | 1831.8  | 1834.9 | 1831.1 | 1831.1  | 1832.3 |
| gdb 4827 | 1836.2 <sup>a</sup> | 1822.7 | 1822.7  | 1825.4 | 1818.5 | 1818.5  | 1821.6 |
| gdb 4828 | 1856.8 <sup>a</sup> | 1846.9 | 1846.9  | 1848.3 | 1848.3 | 1848.3  | 1846.8 |
| gdb 4829 | 1828.8 <sup>a</sup> | 1805.3 | 1805.3  | 1809.8 | 1805.3 | 1805.3  | 1807.3 |
| gdb 4830 | 1833.0 <sup>a</sup> | 1809.8 | 1809.8  | 1813.8 | 1809.7 | 1809.7  | 1811.3 |
| gdb 4831 | 1822.8 <sup>a</sup> | 1799.8 | 1799.8  | 1803.5 | 1796.5 | 1796.5  | 1800.0 |
| gdb 4832 | 1843.6 <sup>a</sup> | 1820.2 | 1820.2  | 1825.0 | 1822.9 | 1822.9  | 1824.6 |
| gdb 4833 | 1832.1 <sup>a</sup> | 1825.3 | 1825.3  | 1825.0 | 1821.4 | 1821.4  | 1818.9 |
| gdb 4834 | 1831.1 <sup>a</sup> | 1825.7 | 1825.6  | 1825.2 | 1822.2 | 1822.2  | 1819.5 |
| gdb 4835 | 1820.8 <sup>a</sup> | 1815.3 | 1815.3  | 1814.2 | 1808.7 | 1808.7  | 1807.8 |
| gdb 4836 | 1830.6 <sup>a</sup> | 1826.6 | 1826.6  | 1828.9 | 1829.0 | 1828.9  | 1827.7 |
| gdb 4837 | 1881.1 <sup>a</sup> | 1875.0 | 1874.9  | 1877.4 | 1877.7 | 1877.7  | 1878.7 |
| gdb 4838 | 1889.1 <sup>a</sup> | 1866.2 | 1866.2  | 1867.8 | 1866.3 | 1866.2  | 1868.7 |
| gdb 4839 | 1880.5 <sup>a</sup> | 1874.7 | 1874.7  | 1876.5 | 1878.4 | 1878.3  | 1879.2 |
| gdb 4840 | 1871.3 <sup>a</sup> | 1865.5 | 1865.5  | 1867.3 | 1865.5 | 1865.5  | 1868.0 |
| gdb 4841 | 1864.8 <sup>a</sup> | 1848.6 | 1848.6  | 1852.7 | 1852.3 | 1852.3  | 1854.6 |
| gdb 4842 | 1852.7 <sup>a</sup> | 1843.4 | 1843.4  | 1844.0 | 1841.2 | 1841.2  | 1840.2 |
| gdb 4843 | 1869.5 <sup>a</sup> | 1852.9 | 1852.8  | 1856.8 | 1856.6 | 1856.6  | 1858.7 |
| gdb 4844 | 1859.4 <sup>a</sup> | 1843.3 | 1843.3  | 1846.9 | 1843.6 | 1843.6  | 1847.6 |
| gdb 4845 | 1856.8 <sup>a</sup> | 1857.8 | 1857.8  | 1859.8 | 1853.5 | 1853.5  | 1854.8 |
| gdb 4846 | 1864.8 <sup>a</sup> | 1865.8 | 1865.8  | 1867.2 | 1861.2 | 1861.1  | 1861.2 |
| gdb 4847 | 1848.5 <sup>a</sup> | 1851.4 | 1851.3  | 1852.4 | 1845.1 | 1845.1  | 1847.5 |
| gdb 4848 | 1870.0 <sup>a</sup> | 1867.4 | 1867.4  | 1871.8 | 1867.0 | 1867.0  | 1868.8 |
| gdb 4849 | 1881.3 <sup>a</sup> | 1878.0 | 1878.0  | 1879.0 | 1879.2 | 1879.2  | 1879.1 |
| gdb 4850 | 1872.9 <sup>a</sup> | 1871.3 | 1871.3  | 1870.1 | 1867.1 | 1867.1  | 1864.6 |
| gdb 4851 | 1882.9 <sup>a</sup> | 1883.3 | 1883.3  | 1885.4 | 1884.4 | 1884.4  | 1884.2 |
| gdb 4852 | 1873.0 <sup>a</sup> | 1873.0 | 1873.0  | 1874.8 | 1871.0 | 1871.0  | 1872.7 |
| gdb 4853 | 1885.1 <sup>a</sup> | 1881.1 | 1881.1  | 1882.4 | 1882.6 | 1882.6  | 1882.8 |
| gdb 4854 | 1879.8 <sup>a</sup> | 1877.0 | 1877.0  | 1876.6 | 1870.6 | 1870.6  | 1869.3 |
| gdb 4855 | 1881.5 <sup>a</sup> | 1880.2 | 1880.2  | 1879.3 | 1873.9 | 1873.9  | 1871.7 |
| gdb 4856 | 1869.9 <sup>a</sup> | 1869.6 | 1869.6  | 1868.2 | 1860.2 | 1860.1  | 1859.7 |
| gdb 4857 | 1888.4 <sup>a</sup> | 1889.4 | 1889.4  | 1891.7 | 1888.5 | 1888.5  | 1888.7 |
| gdb 4858 | 1908.5 <sup>a</sup> | 1914.9 | 1914.9  | 1917.2 | 1915.0 | 1915.0  | 1916.7 |
| gdb 4859 | 1909.2 <sup>a</sup> | 1916.4 | 1916.3  | 1917.7 | 1916.5 | 1916.5  | 1916.9 |
| gdb 4860 | 1898.0 <sup>a</sup> | 1906.6 | 1906.6  | 1907.8 | 1903.3 | 1903.2  | 1905.8 |
| gdb 4861 | 1911.1 <sup>a</sup> | 1914.4 | 1914.4  | 1916.5 | 1914.7 | 1914.7  | 1916.3 |
| gdb 4862 | 1925.5 <sup>a</sup> | 1920.4 | 1920.4  | 1921.7 | 1917.0 | 1916.9  | 1919.9 |
| gdb 4863 | 1912.2 <sup>a</sup> | 1917.3 | 1917.3  | 1919.0 | 1917.7 | 1917.7  | 1918.6 |
| gdb 4864 | 1902.0 <sup>a</sup> | 1907.6 | 1907.6  | 1908.7 | 1904.7 | 1904.7  | 1907.4 |
| gdb 4865 | 1857.2 <sup>a</sup> | 1854.7 | 1854.7  | 1858.3 | 1851.3 | 1851.3  | 1853.5 |
| gdb 4866 | 1862.4 <sup>a</sup> | 1864.5 | 1864.5  | 1868.8 | 1864.1 | 1864.1  | 1865.5 |
| gdb 4867 | 1857.3 <sup>a</sup> | 1854.4 | 1854.4  | 1857.5 | 1855.0 | 1854.9  | 1855.6 |
| gdb 4868 | 1857.6 <sup>a</sup> | 1853.4 | 1853.4  | 1856.7 | 1854.0 | 1854.0  | 1855.1 |
| gdb 4869 | 1855.7 <sup>a</sup> | 1851.1 | 1851.1  | 1851.4 | 1845.6 | 1845.6  | 1843.9 |
| gdb 4870 | 1856.7 <sup>a</sup> | 1853.1 | 1853.0  | 1856.0 | 1854.8 | 1854.8  | 1855.3 |
| gdb 4871 | 1845.7 <sup>a</sup> | 1843.5 | 1843.5  | 1846.4 | 1841.3 | 1841.3  | 1843.8 |
| gdb 4872 | 1858.9 <sup>a</sup> | 1854.0 | 1854.0  | 1857.0 | 1857.5 | 1857.4  | 1857.3 |

... continued on next page ...

Table S73: ... continued from previous page ...

| Species  | Ref.                | OM2    | OM2-D3T | ODM2   | OM3    | OM3-D3T | ODM3   |
|----------|---------------------|--------|---------|--------|--------|---------|--------|
| gdb 4873 | 1858.4 <sup>a</sup> | 1853.5 | 1853.5  | 1853.9 | 1849.3 | 1849.3  | 1846.7 |
| gdb 4874 | 1853.0 <sup>a</sup> | 1848.5 | 1848.5  | 1848.5 | 1844.4 | 1844.3  | 1842.4 |
| gdb 4875 | 1856.2 <sup>a</sup> | 1852.0 | 1852.0  | 1853.7 | 1854.2 | 1854.2  | 1854.2 |
| gdb 4876 | 1913.5 <sup>a</sup> | 1916.7 | 1916.7  | 1919.2 | 1916.3 | 1916.3  | 1917.7 |
| gdb 4877 | 1913.3 <sup>a</sup> | 1918.3 | 1918.3  | 1919.8 | 1918.1 | 1918.0  | 1918.3 |
| gdb 4878 | 1899.2 <sup>a</sup> | 1905.9 | 1905.8  | 1906.9 | 1902.5 | 1902.5  | 1904.8 |
| gdb 4879 | 1851.1 <sup>a</sup> | 1849.3 | 1849.3  | 1853.1 | 1845.3 | 1845.3  | 1848.3 |
| gdb 4880 | 1857.5 <sup>a</sup> | 1853.9 | 1853.9  | 1857.8 | 1850.5 | 1850.5  | 1853.1 |
| gdb 4881 | 1852.1 <sup>a</sup> | 1855.4 | 1855.4  | 1855.1 | 1849.0 | 1849.0  | 1850.2 |
| gdb 4882 | 1842.9 <sup>a</sup> | 1843.1 | 1843.1  | 1846.3 | 1835.6 | 1835.6  | 1839.9 |
| gdb 4883 | 1860.8 <sup>a</sup> | 1866.9 | 1866.9  | 1867.0 | 1865.7 | 1865.6  | 1863.7 |
| gdb 4884 | 1846.8 <sup>a</sup> | 1839.5 | 1839.4  | 1840.4 | 1837.8 | 1837.7  | 1838.0 |
| gdb 4885 | 1851.0 <sup>a</sup> | 1839.8 | 1839.8  | 1843.4 | 1838.2 | 1838.2  | 1841.9 |
| gdb 4886 | 1855.4 <sup>a</sup> | 1845.1 | 1845.1  | 1849.2 | 1847.8 | 1847.8  | 1850.5 |
| gdb 4887 | 1864.6 <sup>a</sup> | 1854.1 | 1854.1  | 1855.9 | 1854.1 | 1854.1  | 1856.4 |
| gdb 4888 | 1859.2 <sup>a</sup> | 1857.2 | 1857.2  | 1858.6 | 1856.3 | 1856.3  | 1858.5 |
| gdb 4889 | 1874.8 <sup>a</sup> | 1869.8 | 1869.8  | 1871.9 | 1871.2 | 1871.2  | 1872.3 |
| gdb 4890 | 1852.9 <sup>a</sup> | 1848.8 | 1848.8  | 1849.0 | 1844.2 | 1844.2  | 1842.6 |
| gdb 4891 | 1843.2 <sup>a</sup> | 1841.0 | 1841.0  | 1843.6 | 1839.9 | 1839.9  | 1842.7 |
| gdb 4892 | 1853.7 <sup>a</sup> | 1850.4 | 1850.4  | 1853.6 | 1851.8 | 1851.7  | 1852.8 |
| gdb 4893 | 1841.6 <sup>a</sup> | 1838.5 | 1838.5  | 1841.7 | 1832.4 | 1832.4  | 1837.0 |
| gdb 4894 | 1854.2 <sup>a</sup> | 1849.8 | 1849.8  | 1853.7 | 1846.7 | 1846.7  | 1849.3 |
| gdb 4895 | 1850.9 <sup>a</sup> | 1846.2 | 1846.2  | 1848.6 | 1843.1 | 1843.1  | 1845.9 |
| gdb 4896 | 1853.9 <sup>a</sup> | 1851.8 | 1851.8  | 1851.0 | 1847.6 | 1847.5  | 1844.6 |
| gdb 4897 | 1898.2 <sup>a</sup> | 1906.2 | 1906.2  | 1907.9 | 1908.7 | 1908.7  | 1910.7 |
| gdb 4898 | 1856.7 <sup>a</sup> | 1854.2 | 1854.2  | 1857.9 | 1850.7 | 1850.6  | 1852.9 |
| gdb 4899 | 1850.2 <sup>a</sup> | 1857.8 | 1857.8  | 1862.3 | 1852.9 | 1852.9  | 1856.3 |
| gdb 4900 | 1858.0 <sup>a</sup> | 1861.0 | 1861.0  | 1865.2 | 1860.1 | 1860.1  | 1862.2 |
| gdb 4901 | 1851.4 <sup>a</sup> | 1847.5 | 1847.5  | 1847.5 | 1840.3 | 1842.5  | 1838.5 |
| gdb 4902 | 1845.8 <sup>a</sup> | 1841.3 | 1841.2  | 1844.2 | 1839.7 | 1839.7  | 1842.2 |
| gdb 4903 | 1856.2 <sup>a</sup> | 1852.7 | 1852.7  | 1856.2 | 1853.2 | 1853.1  | 1854.0 |
| gdb 4904 | 1855.6 <sup>a</sup> | 1850.5 | 1850.5  | 1850.8 | 1844.7 | 1844.7  | 1843.1 |
| gdb 4905 | 1857.3 <sup>a</sup> | 1852.8 | 1852.7  | 1856.2 | 1854.1 | 1854.1  | 1855.4 |
| gdb 4906 | 1848.2 <sup>a</sup> | 1842.9 | 1842.9  | 1845.7 | 1841.1 | 1841.1  | 1843.5 |
| gdb 4907 | 1890.5 <sup>a</sup> | 1898.9 | 1898.9  | 1898.7 | 1899.9 | 1899.8  | 1899.2 |
| gdb 4908 | 1853.1 <sup>a</sup> | 1849.9 | 1849.9  | 1849.8 | 1844.3 | 1844.3  | 1842.1 |
| gdb 4909 | 1850.2 <sup>a</sup> | 1849.9 | 1849.9  | 1848.8 | 1843.2 | 1843.1  | 1840.6 |
| gdb 4910 | 1843.7 <sup>a</sup> | 1846.9 | 1846.9  | 1850.0 | 1843.6 | 1843.5  | 1845.5 |
| gdb 4911 | 1854.8 <sup>a</sup> | 1858.0 | 1858.0  | 1861.8 | 1855.6 | 1855.5  | 1856.0 |
| gdb 4912 | 1858.5 <sup>a</sup> | 1856.3 | 1856.3  | 1858.8 | 1858.7 | 1858.7  | 1858.4 |
| gdb 4913 | 1856.7 <sup>a</sup> | 1851.4 | 1851.4  | 1851.1 | 1847.6 | 1847.6  | 1844.9 |
| gdb 4914 | 1846.9 <sup>a</sup> | 1843.1 | 1843.1  | 1846.5 | 1842.9 | 1842.9  | 1844.6 |
| gdb 4915 | 1894.3 <sup>a</sup> | 1899.7 | 1899.7  | 1900.0 | 1901.5 | 1901.4  | 1901.6 |
| gdb 4916 | 1867.2 <sup>a</sup> | 1866.4 | 1866.4  | 1865.3 | 1862.2 | 1862.2  | 1860.6 |
| gdb 4917 | 1866.3 <sup>a</sup> | 1859.8 | 1859.8  | 1861.7 | 1859.3 | 1859.3  | 1860.7 |
| gdb 4918 | 1863.5 <sup>a</sup> | 1865.2 | 1865.2  | 1866.8 | 1862.3 | 1862.3  | 1864.4 |
| gdb 4919 | 1874.0 <sup>a</sup> | 1872.2 | 1872.2  | 1874.7 | 1872.9 | 1872.9  | 1874.2 |
| gdb 4920 | 1891.2 <sup>a</sup> | 1899.2 | 1899.2  | 1900.4 | 1896.2 | 1896.2  | 1899.1 |
| gdb 4921 | 1903.2 <sup>a</sup> | 1908.0 | 1908.0  | 1910.4 | 1908.3 | 1908.3  | 1910.2 |
| gdb 4922 | 1842.9 <sup>a</sup> | 1842.1 | 1843.5  | 1846.3 | 1841.9 | 1841.8  | 1844.1 |
| gdb 4923 | 1851.7 <sup>a</sup> | 1847.4 | 1847.4  | 1846.9 | 1843.1 | 1843.1  | 1840.8 |
| gdb 4924 | 1855.8 <sup>a</sup> | 1854.3 | 1854.3  | 1857.3 | 1851.9 | 1851.9  | 1853.2 |
| gdb 4925 | 1854.5 <sup>a</sup> | 1852.2 | 1852.1  | 1855.2 | 1849.6 | 1849.6  | 1851.6 |
| gdb 4926 | 1843.4 <sup>a</sup> | 1845.4 | 1845.3  | 1847.8 | 1838.6 | 1838.6  | 1841.7 |
| gdb 4927 | 1898.2 <sup>a</sup> | 1905.2 | 1905.2  | 1906.5 | 1907.2 | 1907.2  | 1908.9 |
| gdb 4928 | 1853.6 <sup>a</sup> | 1851.6 | 1851.6  | 1855.2 | 1847.8 | 1847.8  | 1850.2 |
| gdb 4929 | 1855.4 <sup>a</sup> | 1852.0 | 1852.0  | 1855.7 | 1848.1 | 1848.1  | 1851.2 |
| gdb 4930 | 1854.5 <sup>a</sup> | 1854.0 | 1854.0  | 1856.9 | 1849.2 | 1849.2  | 1851.1 |
| gdb 4931 | 1851.7 <sup>a</sup> | 1857.9 | 1857.9  | 1862.1 | 1852.1 | 1852.1  | 1854.9 |
| gdb 4932 | 1843.6 <sup>a</sup> | 1845.2 | 1845.2  | 1848.3 | 1836.8 | 1836.8  | 1840.9 |
| gdb 4933 | 1860.9 <sup>a</sup> | 1864.0 | 1864.0  | 1867.8 | 1862.2 | 1862.1  | 1863.6 |
| gdb 4934 | 1896.1 <sup>a</sup> | 1904.5 | 1904.5  | 1906.4 | 1901.4 | 1901.3  | 1904.0 |
| gdb 4935 | 1891.3 <sup>a</sup> | 1897.9 | 1897.9  | 1899.1 | 1894.7 | 1894.7  | 1897.4 |
| gdb 4936 | 1900.6 <sup>a</sup> | 1906.5 | 1906.5  | 1908.6 | 1906.9 | 1906.9  | 1908.8 |
| gdb 4937 | 1865.7 <sup>a</sup> | 1874.7 | 1874.7  | 1876.7 | 1864.0 | 1864.0  | 1867.8 |

... continued on next page ...



Table S73: ... continued from previous page ...

| Species  | Ref.                | OM2    | OM2-D3T | ODM2   | OM3    | OM3-D3T | ODM3   |
|----------|---------------------|--------|---------|--------|--------|---------|--------|
| gdb 4938 | 1867.0 <sup>a</sup> | 1877.8 | 1877.8  | 1879.8 | 1867.2 | 1867.2  | 1870.4 |
| gdb 4939 | 1865.0 <sup>a</sup> | 1874.2 | 1874.2  | 1875.9 | 1864.6 | 1864.6  | 1868.1 |
| gdb 4940 | 1857.0 <sup>a</sup> | 1866.1 | 1866.1  | 1868.8 | 1858.1 | 1858.1  | 1862.0 |
| gdb 4941 | 1869.3 <sup>a</sup> | 1875.8 | 1875.8  | 1878.6 | 1871.8 | 1871.8  | 1873.5 |
| gdb 4942 | 1868.9 <sup>a</sup> | 1872.9 | 1872.9  | 1876.5 | 1869.1 | 1869.0  | 1871.8 |
| gdb 4943 | 1835.7 <sup>a</sup> | 1827.8 | 1827.8  | 1827.0 | 1824.6 | 1824.5  | 1821.8 |
| gdb 4944 | 1832.9 <sup>a</sup> | 1825.1 | 1825.1  | 1825.2 | 1823.8 | 1823.8  | 1819.3 |
| gdb 4945 | 1824.7 <sup>a</sup> | 1816.8 | 1816.8  | 1816.0 | 1811.2 | 1811.1  | 1810.0 |
| gdb 4946 | 1826.3 <sup>a</sup> | 1817.5 | 1817.5  | 1820.7 | 1818.2 | 1818.2  | 1819.8 |
| gdb 4947 | 1837.2 <sup>a</sup> | 1830.0 | 1830.0  | 1832.3 | 1833.5 | 1833.5  | 1833.2 |
| gdb 4948 | 1882.2 <sup>a</sup> | 1876.2 | 1876.2  | 1878.6 | 1879.5 | 1879.4  | 1880.3 |
| gdb 4949 | 1889.2 <sup>a</sup> | 1867.1 | 1867.1  | 1868.2 | 1867.6 | 1867.5  | 1869.4 |
| gdb 4950 | 1881.1 <sup>a</sup> | 1874.2 | 1874.2  | 1876.3 | 1878.0 | 1878.0  | 1878.7 |
| gdb 4951 | 1870.8 <sup>a</sup> | 1864.9 | 1864.9  | 1867.1 | 1865.6 | 1865.6  | 1867.9 |
| gdb 4952 | 1831.0 <sup>a</sup> | 1807.5 | 1807.5  | 1811.3 | 1808.4 | 1808.4  | 1809.7 |
| gdb 4953 | 1833.1 <sup>a</sup> | 1808.5 | 1808.5  | 1811.8 | 1808.9 | 1808.9  | 1810.2 |
| gdb 4954 | 1824.5 <sup>a</sup> | 1800.9 | 1800.9  | 1804.5 | 1797.4 | 1797.4  | 1800.0 |
| gdb 4955 | 1835.7 <sup>a</sup> | 1810.6 | 1810.6  | 1817.2 | 1810.7 | 1810.7  | 1814.9 |
| gdb 4956 | 1843.3 <sup>a</sup> | 1818.6 | 1818.6  | 1824.2 | 1822.6 | 1822.6  | 1825.0 |
| gdb 4957 | 1844.1 <sup>a</sup> | 1828.3 | 1828.3  | 1830.3 | 1828.2 | 1828.2  | 1829.5 |
| gdb 4958 | 1851.7 <sup>a</sup> | 1832.5 | 1832.5  | 1836.3 | 1832.8 | 1832.8  | 1834.2 |
| gdb 4959 | 1845.0 <sup>a</sup> | 1831.9 | 1831.9  | 1836.3 | 1831.8 | 1831.8  | 1834.7 |
| gdb 4960 | 1834.4 <sup>a</sup> | 1817.0 | 1817.0  | 1820.0 | 1814.8 | 1814.7  | 1818.0 |
| gdb 4961 | 1859.2 <sup>a</sup> | 1843.8 | 1843.8  | 1848.3 | 1846.4 | 1846.4  | 1847.8 |
| gdb 4962 | 1850.1 <sup>a</sup> | 1833.8 | 1833.8  | 1836.2 | 1834.4 | 1834.4  | 1835.4 |
| gdb 4963 | 1838.4 <sup>a</sup> | 1823.3 | 1823.3  | 1825.3 | 1820.4 | 1820.4  | 1822.5 |
| gdb 4964 | 1845.6 <sup>a</sup> | 1833.3 | 1831.6  | 1835.4 | 1832.9 | 1831.3  | 1834.1 |
| gdb 4965 | 1859.4 <sup>a</sup> | 1844.4 | 1844.4  | 1846.8 | 1846.4 | 1846.4  | 1846.9 |
| gdb 4966 | 1843.8 <sup>a</sup> | 1829.2 | 1829.2  | 1832.1 | 1829.8 | 1829.8  | 1831.4 |
| gdb 4967 | 1845.4 <sup>a</sup> | 1830.8 | 1830.8  | 1834.5 | 1830.7 | 1830.6  | 1832.3 |
| gdb 4968 | 1843.7 <sup>a</sup> | 1830.3 | 1830.3  | 1834.9 | 1830.0 | 1829.9  | 1833.5 |
| gdb 4969 | 1832.8 <sup>a</sup> | 1817.5 | 1817.5  | 1820.3 | 1813.8 | 1813.8  | 1817.1 |
| gdb 4970 | 1856.4 <sup>a</sup> | 1843.8 | 1843.8  | 1848.4 | 1846.4 | 1846.3  | 1847.9 |
| gdb 4971 | 1846.2 <sup>a</sup> | 1829.6 | 1829.6  | 1832.0 | 1830.3 | 1830.3  | 1831.6 |
| gdb 4972 | 1848.9 <sup>a</sup> | 1831.4 | 1831.4  | 1833.9 | 1832.2 | 1832.2  | 1833.5 |
| gdb 4973 | 1845.4 <sup>a</sup> | 1827.1 | 1827.0  | 1829.8 | 1828.2 | 1828.2  | 1829.6 |
| gdb 4974 | 1842.9 <sup>a</sup> | 1827.1 | 1827.1  | 1830.7 | 1827.9 | 1827.9  | 1830.9 |
| gdb 4975 | 1837.4 <sup>a</sup> | 1820.9 | 1820.9  | 1823.0 | 1818.4 | 1818.3  | 1820.7 |
| gdb 4976 | 1834.3 <sup>a</sup> | 1818.3 | 1818.2  | 1820.5 | 1815.0 | 1815.0  | 1817.9 |
| gdb 4977 | 1854.7 <sup>a</sup> | 1837.6 | 1837.6  | 1840.1 | 1841.5 | 1841.5  | 1842.3 |
| gdb 4978 | 1847.6 <sup>a</sup> | 1845.0 | 1844.9  | 1849.2 | 1837.9 | 1837.9  | 1842.1 |
| gdb 4979 | 1856.5 <sup>a</sup> | 1851.3 | 1851.3  | 1854.5 | 1848.5 | 1848.4  | 1850.8 |
| gdb 4980 | 1857.5 <sup>a</sup> | 1845.6 | 1845.6  | 1848.5 | 1843.1 | 1843.1  | 1846.1 |
| gdb 4981 | 1856.2 <sup>a</sup> | 1849.0 | 1849.0  | 1852.3 | 1846.0 | 1846.0  | 1850.2 |
| gdb 4982 | 1858.0 <sup>a</sup> | 1854.5 | 1854.5  | 1857.5 | 1850.5 | 1850.5  | 1854.3 |
| gdb 4983 | 1856.0 <sup>a</sup> | 1845.0 | 1844.9  | 1847.1 | 1842.1 | 1842.1  | 1845.1 |
| gdb 4984 | 1867.8 <sup>a</sup> | 1860.9 | 1860.9  | 1864.3 | 1860.5 | 1860.5  | 1863.1 |
| gdb 4985 | 1869.0 <sup>a</sup> | 1866.5 | 1866.5  | 1869.6 | 1865.4 | 1865.4  | 1867.4 |
| gdb 4986 | 1868.2 <sup>a</sup> | 1856.5 | 1856.5  | 1858.9 | 1857.0 | 1857.0  | 1858.5 |
| gdb 4987 | 1872.4 <sup>a</sup> | 1867.8 | 1867.8  | 1871.1 | 1867.3 | 1867.2  | 1870.2 |
| gdb 4988 | 1884.9 <sup>a</sup> | 1882.0 | 1882.0  | 1884.4 | 1884.1 | 1884.1  | 1885.1 |
| gdb 4989 | 1881.6 <sup>a</sup> | 1875.3 | 1875.3  | 1877.7 | 1878.7 | 1878.7  | 1879.7 |
| gdb 4990 | 1881.7 <sup>a</sup> | 1874.6 | 1874.6  | 1876.8 | 1878.6 | 1878.6  | 1879.4 |
| gdb 4991 | 1892.1 <sup>a</sup> | 1868.2 | 1868.2  | 1869.3 | 1869.2 | 1869.2  | 1870.9 |
| gdb 4992 | 1871.3 <sup>a</sup> | 1864.6 | 1864.6  | 1867.1 | 1865.9 | 1865.8  | 1868.6 |
| gdb 4993 | 1872.7 <sup>a</sup> | 1854.2 | 1854.2  | 1857.1 | 1858.6 | 1858.5  | 1859.6 |
| gdb 4994 | 1863.5 <sup>a</sup> | 1852.1 | 1852.1  | 1851.9 | 1851.1 | 1851.1  | 1848.7 |
| gdb 4995 | 1874.5 <sup>a</sup> | 1854.5 | 1854.5  | 1857.8 | 1858.7 | 1858.7  | 1859.8 |
| gdb 4996 | 1864.5 <sup>a</sup> | 1845.4 | 1845.4  | 1848.3 | 1846.1 | 1846.1  | 1848.8 |
| gdb 4997 | 1867.1 <sup>a</sup> | 1864.7 | 1864.7  | 1866.2 | 1861.2 | 1861.2  | 1861.5 |
| gdb 4998 | 1862.9 <sup>a</sup> | 1857.8 | 1857.8  | 1862.2 | 1854.8 | 1854.8  | 1858.7 |
| gdb 4999 | 1871.4 <sup>a</sup> | 1864.8 | 1864.8  | 1868.1 | 1865.0 | 1865.0  | 1866.7 |
| gdb 5000 | 1855.8 <sup>a</sup> | 1843.7 | 1843.7  | 1844.0 | 1842.5 | 1842.5  | 1841.3 |
| gdb 5001 | 1857.8 <sup>a</sup> | 1839.5 | 1839.5  | 1842.5 | 1839.1 | 1839.0  | 1842.4 |
| gdb 5002 | 1863.5 <sup>a</sup> | 1847.2 | 1847.2  | 1848.9 | 1849.8 | 1849.8  | 1851.3 |

... continued on next page ...

Table S73: ... continued from previous page ...

| Species  | Ref.                | OM2    | OM2-D3T | ODM2   | OM3    | OM3-D3T | ODM3   |
|----------|---------------------|--------|---------|--------|--------|---------|--------|
| gdb 5003 | 1906.7 <sup>a</sup> | 1895.8 | 1895.8  | 1897.7 | 1893.8 | 1893.8  | 1896.2 |
| gdb 5004 | 1890.3 <sup>a</sup> | 1887.5 | 1887.5  | 1887.5 | 1888.4 | 1885.3  | 1885.7 |
| gdb 5005 | 1888.8 <sup>a</sup> | 1884.2 | 1884.2  | 1887.2 | 1882.4 | 1882.4  | 1886.2 |
| gdb 5006 | 1896.6 <sup>a</sup> | 1891.9 | 1891.9  | 1893.9 | 1893.2 | 1893.2  | 1894.8 |
| gdb 5007 | 1864.5 <sup>a</sup> | 1863.5 | 1863.5  | 1864.8 | 1860.5 | 1860.4  | 1860.5 |
| gdb 5008 | 1855.2 <sup>a</sup> | 1847.8 | 1847.8  | 1846.1 | 1839.6 | 1839.5  | 1836.7 |
| gdb 5009 | 1853.1 <sup>a</sup> | 1842.7 | 1842.6  | 1843.1 | 1835.0 | 1835.0  | 1835.4 |
| gdb 5010 | 1860.0 <sup>a</sup> | 1849.8 | 1849.8  | 1850.6 | 1845.8 | 1845.8  | 1844.7 |
| gdb 5011 | 1858.9 <sup>a</sup> | 1852.6 | 1852.6  | 1853.8 | 1849.9 | 1849.9  | 1849.4 |
| gdb 5012 | 1829.3 <sup>a</sup> | 1812.4 | 1812.4  | 1809.8 | 1805.6 | 1805.5  | 1800.6 |
| gdb 5013 | 1833.7 <sup>a</sup> | 1810.2 | 1810.2  | 1811.2 | 1804.8 | 1804.7  | 1804.7 |
| gdb 5014 | 1840.7 <sup>a</sup> | 1817.6 | 1817.6  | 1818.8 | 1816.1 | 1816.1  | 1814.5 |
| gdb 5015 | 1830.8 <sup>a</sup> | 1818.8 | 1818.8  | 1820.0 | 1817.8 | 1817.8  | 1815.9 |
| gdb 5016 | 1853.3 <sup>a</sup> | 1842.6 | 1842.6  | 1843.4 | 1842.2 | 1842.1  | 1842.1 |
| gdb 5017 | 1855.3 <sup>a</sup> | 1838.9 | 1838.9  | 1842.5 | 1839.1 | 1839.1  | 1843.1 |
| gdb 5018 | 1861.0 <sup>a</sup> | 1846.7 | 1846.7  | 1850.4 | 1850.5 | 1850.5  | 1852.8 |
| gdb 5019 | 1865.0 <sup>a</sup> | 1863.7 | 1863.7  | 1865.2 | 1860.5 | 1860.5  | 1860.8 |
| gdb 5020 | 1881.7 <sup>a</sup> | 1879.4 | 1879.4  | 1880.9 | 1875.1 | 1875.1  | 1876.3 |
| gdb 5021 | 1904.7 <sup>a</sup> | 1893.6 | 1893.6  | 1895.6 | 1891.2 | 1891.2  | 1893.9 |
| gdb 5022 | 1890.8 <sup>a</sup> | 1887.8 | 1887.8  | 1888.7 | 1885.5 | 1885.5  | 1885.7 |
| gdb 5023 | 1886.4 <sup>a</sup> | 1881.1 | 1881.1  | 1884.0 | 1879.3 | 1879.3  | 1882.9 |
| gdb 5024 | 1896.1 <sup>a</sup> | 1891.8 | 1891.8  | 1895.1 | 1893.4 | 1893.4  | 1895.5 |
| gdb 5025 | 1883.1 <sup>a</sup> | 1880.5 | 1880.5  | 1883.1 | 1877.0 | 1877.0  | 1878.7 |
| gdb 5026 | 1869.8 <sup>a</sup> | 1851.2 | 1851.2  | 1855.0 | 1855.6 | 1855.5  | 1857.3 |
| gdb 5027 | 1873.1 <sup>a</sup> | 1853.0 | 1853.0  | 1856.4 | 1857.4 | 1857.3  | 1859.1 |
| gdb 5028 | 1857.9 <sup>a</sup> | 1847.4 | 1847.4  | 1847.7 | 1846.1 | 1846.0  | 1844.2 |
| gdb 5029 | 1863.0 <sup>a</sup> | 1843.7 | 1843.7  | 1847.1 | 1844.2 | 1844.2  | 1847.4 |
| gdb 5030 | 1862.5 <sup>a</sup> | 1861.5 | 1861.5  | 1863.4 | 1857.6 | 1857.6  | 1858.4 |
| gdb 5031 | 1868.2 <sup>a</sup> | 1865.7 | 1865.7  | 1868.2 | 1861.8 | 1861.8  | 1862.2 |
| gdb 5032 | 1861.9 <sup>a</sup> | 1857.9 | 1857.9  | 1862.1 | 1854.3 | 1854.3  | 1858.0 |
| gdb 5033 | 1870.5 <sup>a</sup> | 1866.9 | 1866.9  | 1872.3 | 1867.3 | 1867.2  | 1869.6 |
| gdb 5034 | 1884.4 <sup>a</sup> | 1883.2 | 1883.2  | 1885.2 | 1882.0 | 1881.9  | 1883.7 |
| gdb 5035 | 1881.7 <sup>a</sup> | 1880.0 | 1880.0  | 1882.5 | 1878.9 | 1878.8  | 1881.0 |
| gdb 5036 | 1888.4 <sup>a</sup> | 1886.1 | 1886.1  | 1886.6 | 1883.4 | 1883.4  | 1882.8 |
| gdb 5037 | 1882.6 <sup>a</sup> | 1878.7 | 1878.7  | 1881.3 | 1877.3 | 1877.3  | 1880.6 |
| gdb 5038 | 1893.0 <sup>a</sup> | 1888.1 | 1888.1  | 1889.8 | 1889.9 | 1889.8  | 1891.1 |
| gdb 5039 | 1884.1 <sup>a</sup> | 1877.5 | 1877.5  | 1879.3 | 1880.9 | 1880.9  | 1881.4 |
| gdb 5040 | 1881.1 <sup>a</sup> | 1874.4 | 1874.4  | 1872.8 | 1872.1 | 1872.0  | 1869.2 |
| gdb 5041 | 1893.7 <sup>a</sup> | 1870.8 | 1870.8  | 1871.5 | 1871.8 | 1871.8  | 1873.1 |
| gdb 5042 | 1884.5 <sup>a</sup> | 1875.7 | 1875.7  | 1877.6 | 1880.0 | 1880.0  | 1880.2 |
| gdb 5043 | 1873.5 <sup>a</sup> | 1866.6 | 1866.6  | 1868.3 | 1867.6 | 1867.6  | 1869.8 |
| gdb 5044 | 1838.0 <sup>a</sup> | 1829.7 | 1829.7  | 1828.5 | 1826.5 | 1826.5  | 1823.5 |
| gdb 5045 | 1843.1 <sup>a</sup> | 1833.5 | 1833.5  | 1832.5 | 1830.3 | 1830.3  | 1826.8 |
| gdb 5046 | 1836.0 <sup>a</sup> | 1827.3 | 1827.3  | 1826.2 | 1825.0 | 1825.0  | 1821.9 |
| gdb 5047 | 1834.3 <sup>a</sup> | 1823.3 | 1823.3  | 1818.6 | 1814.6 | 1814.6  | 1808.4 |
| gdb 5048 | 1826.8 <sup>a</sup> | 1818.6 | 1818.6  | 1817.2 | 1812.9 | 1812.9  | 1811.4 |
| gdb 5049 | 1828.0 <sup>a</sup> | 1821.3 | 1821.3  | 1823.4 | 1822.4 | 1822.4  | 1823.8 |
| gdb 5050 | 1838.2 <sup>a</sup> | 1831.3 | 1831.3  | 1833.7 | 1835.3 | 1835.2  | 1835.1 |
| gdb 5051 | 1886.4 <sup>a</sup> | 1881.3 | 1881.3  | 1880.6 | 1876.8 | 1876.8  | 1874.9 |
| gdb 5052 | 1873.8 <sup>a</sup> | 1871.0 | 1871.0  | 1873.8 | 1870.5 | 1870.5  | 1873.4 |
| gdb 5053 | 1886.7 <sup>a</sup> | 1881.8 | 1881.8  | 1883.5 | 1883.6 | 1883.5  | 1884.3 |
| gdb 5054 | 1884.1 <sup>a</sup> | 1878.7 | 1878.7  | 1880.5 | 1881.9 | 1881.9  | 1882.4 |
| gdb 5055 | 1893.7 <sup>a</sup> | 1870.5 | 1870.5  | 1871.3 | 1871.7 | 1871.6  | 1873.1 |
| gdb 5056 | 1882.5 <sup>a</sup> | 1875.8 | 1875.8  | 1877.9 | 1880.4 | 1880.4  | 1881.0 |
| gdb 5057 | 1881.1 <sup>a</sup> | 1874.4 | 1874.4  | 1872.9 | 1872.0 | 1872.0  | 1869.2 |
| gdb 5058 | 1873.4 <sup>a</sup> | 1866.9 | 1866.9  | 1868.5 | 1867.6 | 1867.5  | 1869.5 |
| gdb 5059 | 1886.5 <sup>a</sup> | 1881.5 | 1881.5  | 1880.7 | 1877.0 | 1877.0  | 1875.0 |
| gdb 5060 | 1874.5 <sup>a</sup> | 1871.0 | 1871.0  | 1873.3 | 1870.7 | 1870.7  | 1873.4 |
| gdb 5061 | 1884.9 <sup>a</sup> | 1882.4 | 1882.4  | 1885.1 | 1884.4 | 1884.4  | 1885.5 |
| gdb 5062 | 1870.3 <sup>a</sup> | 1860.7 | 1860.7  | 1862.1 | 1861.3 | 1861.3  | 1862.7 |
| gdb 5063 | 1867.7 <sup>a</sup> | 1858.6 | 1858.5  | 1859.9 | 1859.5 | 1859.5  | 1860.7 |
| gdb 5064 | 1874.5 <sup>a</sup> | 1869.5 | 1869.5  | 1867.8 | 1865.9 | 1865.9  | 1863.3 |
| gdb 5065 | 1867.3 <sup>a</sup> | 1863.0 | 1863.0  | 1864.4 | 1863.0 | 1863.0  | 1865.2 |
| gdb 5066 | 1876.8 <sup>a</sup> | 1874.4 | 1874.4  | 1876.0 | 1876.6 | 1876.6  | 1877.2 |
| gdb 5067 | 1881.9 <sup>a</sup> | 1877.1 | 1877.1  | 1879.0 | 1880.1 | 1880.0  | 1880.4 |

... continued on next page ...

Table S73: ... continued from previous page ...

| Species  | Ref.                | OM2    | OM2-D3T | ODM2   | OM3    | OM3-D3T | ODM3   |
|----------|---------------------|--------|---------|--------|--------|---------|--------|
| gdb 5068 | 1881.7 <sup>a</sup> | 1878.1 | 1878.1  | 1879.7 | 1880.5 | 1880.5  | 1880.6 |
| gdb 5069 | 1876.2 <sup>a</sup> | 1871.8 | 1871.8  | 1871.8 | 1870.5 | 1869.0  | 1868.9 |
| gdb 5070 | 1871.5 <sup>a</sup> | 1866.6 | 1866.6  | 1868.7 | 1867.2 | 1867.2  | 1869.4 |
| gdb 5071 | 1893.0 <sup>a</sup> | 1897.0 | 1897.0  | 1898.6 | 1897.2 | 1897.2  | 1898.7 |
| gdb 5072 | 1911.4 <sup>a</sup> | 1906.8 | 1906.8  | 1907.5 | 1905.1 | 1905.1  | 1907.0 |
| gdb 5073 | 1899.4 <sup>a</sup> | 1899.6 | 1899.6  | 1897.2 | 1896.4 | 1896.3  | 1892.9 |
| gdb 5074 | 1891.7 <sup>a</sup> | 1894.9 | 1894.9  | 1895.8 | 1895.0 | 1894.9  | 1896.6 |
| gdb 5075 | 1902.4 <sup>a</sup> | 1905.7 | 1905.7  | 1907.0 | 1908.2 | 1908.2  | 1908.2 |
| gdb 5076 | 1883.0 <sup>a</sup> | 1881.0 | 1881.0  | 1879.8 | 1876.6 | 1876.6  | 1874.1 |
| gdb 5077 | 1882.4 <sup>a</sup> | 1878.8 | 1878.8  | 1880.9 | 1881.6 | 1881.6  | 1881.7 |
| gdb 5078 | 1882.4 <sup>a</sup> | 1877.7 | 1877.7  | 1879.1 | 1880.0 | 1880.0  | 1879.7 |
| gdb 5079 | 1876.5 <sup>a</sup> | 1872.4 | 1872.4  | 1870.6 | 1869.4 | 1869.3  | 1866.1 |
| gdb 5080 | 1871.2 <sup>a</sup> | 1867.0 | 1867.0  | 1868.8 | 1867.2 | 1867.2  | 1868.9 |
| gdb 5081 | 1881.7 <sup>a</sup> | 1878.0 | 1878.0  | 1877.4 | 1872.9 | 1872.9  | 1871.0 |
| gdb 5082 | 1883.5 <sup>a</sup> | 1880.1 | 1880.1  | 1880.0 | 1875.0 | 1875.0  | 1873.0 |
| gdb 5083 | 1875.3 <sup>a</sup> | 1873.9 | 1873.9  | 1876.8 | 1872.2 | 1872.1  | 1874.7 |
| gdb 5084 | 1885.8 <sup>a</sup> | 1883.7 | 1883.7  | 1885.7 | 1883.8 | 1883.8  | 1884.3 |
| gdb 5085 | 1871.1 <sup>a</sup> | 1867.3 | 1867.3  | 1866.0 | 1864.5 | 1864.5  | 1862.5 |
| gdb 5086 | 1866.6 <sup>a</sup> | 1857.9 | 1857.9  | 1859.7 | 1859.0 | 1859.0  | 1860.5 |
| gdb 5087 | 1862.9 <sup>a</sup> | 1860.1 | 1860.1  | 1862.0 | 1860.5 | 1860.5  | 1863.8 |
| gdb 5088 | 1871.7 <sup>a</sup> | 1870.9 | 1870.9  | 1872.8 | 1873.6 | 1873.9  | 1874.8 |
| gdb 5089 | 1840.0 <sup>a</sup> | 1831.0 | 1831.0  | 1829.7 | 1827.7 | 1827.7  | 1824.3 |
| gdb 5090 | 1841.2 <sup>a</sup> | 1831.8 | 1831.8  | 1830.7 | 1828.8 | 1828.8  | 1825.6 |
| gdb 5091 | 1834.0 <sup>a</sup> | 1823.2 | 1823.2  | 1818.4 | 1814.6 | 1814.6  | 1808.3 |
| gdb 5092 | 1839.0 <sup>a</sup> | 1829.6 | 1829.6  | 1828.9 | 1827.3 | 1827.3  | 1824.0 |
| gdb 5093 | 1829.7 <sup>a</sup> | 1820.6 | 1820.6  | 1819.4 | 1815.1 | 1815.1  | 1813.5 |
| gdb 5094 | 1828.7 <sup>a</sup> | 1820.1 | 1820.1  | 1822.4 | 1821.9 | 1821.9  | 1823.4 |
| gdb 5095 | 1839.6 <sup>a</sup> | 1830.8 | 1830.8  | 1833.3 | 1835.2 | 1835.2  | 1835.0 |
| gdb 5096 | 1848.9 <sup>a</sup> | 1838.3 | 1838.3  | 1834.3 | 1829.5 | 1829.5  | 1823.5 |
| gdb 5097 | 1842.5 <sup>a</sup> | 1832.1 | 1832.0  | 1831.2 | 1826.7 | 1826.7  | 1825.6 |
| gdb 5098 | 1846.3 <sup>a</sup> | 1831.6 | 1831.6  | 1834.4 | 1833.9 | 1833.9  | 1834.2 |
| gdb 5099 | 1850.8 <sup>a</sup> | 1842.8 | 1842.7  | 1842.0 | 1839.8 | 1839.8  | 1836.8 |
| gdb 5100 | 1848.5 <sup>a</sup> | 1843.0 | 1843.0  | 1840.8 | 1838.0 | 1838.0  | 1835.0 |
| gdb 5101 | 1838.3 <sup>a</sup> | 1829.7 | 1829.7  | 1828.9 | 1826.5 | 1826.5  | 1823.4 |
| gdb 5102 | 1837.3 <sup>a</sup> | 1828.8 | 1828.7  | 1827.9 | 1826.4 | 1826.4  | 1823.2 |
| gdb 5103 | 1825.1 <sup>a</sup> | 1818.0 | 1818.0  | 1819.9 | 1819.3 | 1819.3  | 1820.8 |
| gdb 5104 | 1834.8 <sup>a</sup> | 1829.1 | 1829.1  | 1830.8 | 1832.9 | 1832.9  | 1832.7 |
| gdb 5105 | 1874.9 <sup>a</sup> | 1865.4 | 1865.4  | 1861.0 | 1856.2 | 1856.1  | 1850.6 |
| gdb 5106 | 1863.0 <sup>a</sup> | 1860.1 | 1860.1  | 1858.7 | 1854.1 | 1854.0  | 1853.0 |
| gdb 5107 | 1865.1 <sup>a</sup> | 1864.1 | 1864.1  | 1866.3 | 1864.1 | 1864.0  | 1865.1 |
| gdb 5108 | 1873.1 <sup>a</sup> | 1870.2 | 1870.2  | 1869.1 | 1866.5 | 1866.5  | 1863.9 |
| gdb 5109 | 1874.6 <sup>a</sup> | 1872.0 | 1872.0  | 1870.8 | 1868.0 | 1868.0  | 1864.8 |
| gdb 5110 | 1840.2 <sup>a</sup> | 1831.2 | 1831.2  | 1830.1 | 1827.8 | 1827.8  | 1824.6 |
| gdb 5111 | 1841.3 <sup>a</sup> | 1831.9 | 1831.9  | 1831.0 | 1828.9 | 1828.9  | 1825.8 |
| gdb 5112 | 1839.5 <sup>a</sup> | 1830.4 | 1830.3  | 1829.7 | 1828.3 | 1828.3  | 1824.9 |
| gdb 5113 | 1834.0 <sup>a</sup> | 1823.3 | 1823.3  | 1818.8 | 1814.5 | 1814.5  | 1808.4 |
| gdb 5114 | 1829.4 <sup>a</sup> | 1821.4 | 1821.4  | 1823.6 | 1822.9 | 1822.9  | 1824.1 |
| gdb 5115 | 1829.9 <sup>a</sup> | 1821.0 | 1821.0  | 1819.9 | 1815.4 | 1815.4  | 1813.8 |
| gdb 5116 | 1839.1 <sup>a</sup> | 1831.5 | 1831.5  | 1833.9 | 1835.4 | 1835.3  | 1835.3 |
| gdb 5117 | 1852.6 <sup>a</sup> | 1842.3 | 1842.3  | 1840.8 | 1834.2 | 1834.2  | 1831.7 |
| gdb 5118 | 1844.5 <sup>a</sup> | 1837.0 | 1837.0  | 1838.1 | 1832.4 | 1832.4  | 1834.2 |
| gdb 5119 | 1856.6 <sup>a</sup> | 1849.3 | 1849.3  | 1850.7 | 1847.0 | 1847.0  | 1847.1 |
| gdb 5120 | 1862.2 <sup>a</sup> | 1850.5 | 1850.5  | 1851.3 | 1846.7 | 1846.7  | 1845.5 |
| gdb 5121 | 1843.8 <sup>a</sup> | 1833.8 | 1833.8  | 1833.6 | 1826.6 | 1826.6  | 1825.4 |
| gdb 5122 | 1843.8 <sup>a</sup> | 1833.3 | 1833.3  | 1833.2 | 1826.2 | 1826.2  | 1825.3 |
| gdb 5123 | 1836.5 <sup>a</sup> | 1827.9 | 1827.9  | 1830.7 | 1824.0 | 1823.9  | 1827.3 |
| gdb 5124 | 1844.4 <sup>a</sup> | 1830.4 | 1830.4  | 1833.7 | 1826.9 | 1826.9  | 1831.1 |
| gdb 5125 | 1846.5 <sup>a</sup> | 1837.9 | 1837.9  | 1840.9 | 1836.5 | 1836.5  | 1838.3 |
| gdb 5126 | 1854.3 <sup>a</sup> | 1841.4 | 1841.4  | 1844.9 | 1840.2 | 1840.2  | 1842.7 |
| gdb 5127 | 1848.8 <sup>a</sup> | 1845.2 | 1845.2  | 1845.6 | 1840.5 | 1840.5  | 1838.4 |
| gdb 5128 | 1884.6 <sup>a</sup> | 1881.1 | 1881.1  | 1880.1 | 1876.8 | 1876.8  | 1874.6 |
| gdb 5129 | 1882.7 <sup>a</sup> | 1878.9 | 1878.8  | 1878.4 | 1873.8 | 1873.8  | 1872.0 |
| gdb 5130 | 1883.5 <sup>a</sup> | 1880.8 | 1880.8  | 1880.4 | 1875.4 | 1875.4  | 1873.1 |
| gdb 5131 | 1873.1 <sup>a</sup> | 1872.5 | 1872.5  | 1875.5 | 1870.1 | 1870.1  | 1872.7 |
| gdb 5132 | 1885.8 <sup>a</sup> | 1883.9 | 1883.9  | 1884.9 | 1883.5 | 1883.5  | 1883.5 |

... continued on next page ...

Table S73: ... continued from previous page ...

| Species  | Ref.                | OM2    | OM2-D3T | ODM2   | OM3    | OM3-D3T | ODM3   |
|----------|---------------------|--------|---------|--------|--------|---------|--------|
| gdb 5133 | 1877.3 <sup>a</sup> | 1876.0 | 1876.0  | 1878.6 | 1874.9 | 1874.9  | 1877.7 |
| gdb 5134 | 1887.3 <sup>a</sup> | 1881.6 | 1881.6  | 1880.6 | 1877.7 | 1877.7  | 1875.3 |
| gdb 5135 | 1902.2 <sup>a</sup> | 1903.5 | 1903.5  | 1901.4 | 1901.1 | 1901.1  | 1898.6 |
| gdb 5136 | 1911.6 <sup>a</sup> | 1907.7 | 1907.7  | 1908.2 | 1906.9 | 1906.8  | 1908.8 |
| gdb 5137 | 1909.3 <sup>a</sup> | 1905.2 | 1905.2  | 1906.0 | 1904.4 | 1904.4  | 1906.6 |
| gdb 5138 | 1890.3 <sup>a</sup> | 1896.0 | 1896.0  | 1896.8 | 1896.3 | 1896.3  | 1898.5 |
| gdb 5139 | 1901.3 <sup>a</sup> | 1905.7 | 1905.7  | 1905.6 | 1907.9 | 1907.9  | 1907.8 |
| gdb 5140 | 1884.1 <sup>a</sup> | 1880.8 | 1880.8  | 1879.7 | 1876.4 | 1876.4  | 1874.0 |
| gdb 5141 | 1875.1 <sup>a</sup> | 1865.5 | 1865.5  | 1861.0 | 1856.2 | 1856.2  | 1850.4 |
| gdb 5142 | 1861.8 <sup>a</sup> | 1859.3 | 1859.3  | 1857.8 | 1853.0 | 1853.0  | 1851.7 |
| gdb 5143 | 1851.4 <sup>a</sup> | 1851.9 | 1851.9  | 1854.1 | 1848.9 | 1848.9  | 1851.8 |
| gdb 5144 | 1873.1 <sup>a</sup> | 1870.6 | 1870.6  | 1869.5 | 1866.7 | 1866.7  | 1863.9 |
| gdb 5145 | 1862.3 <sup>a</sup> | 1862.3 | 1862.3  | 1864.9 | 1861.9 | 1861.9  | 1863.4 |
| gdb 5146 | 1878.6 <sup>a</sup> | 1872.1 | 1872.1  | 1871.1 | 1868.2 | 1868.2  | 1864.9 |
| gdb 5147 | 1849.4 <sup>a</sup> | 1837.8 | 1837.7  | 1833.7 | 1828.9 | 1828.9  | 1823.2 |
| gdb 5148 | 1840.3 <sup>a</sup> | 1830.8 | 1830.8  | 1830.0 | 1825.0 | 1825.0  | 1823.8 |
| gdb 5149 | 1833.4 <sup>a</sup> | 1819.8 | 1819.7  | 1822.2 | 1818.5 | 1818.5  | 1820.5 |
| gdb 5150 | 1852.8 <sup>a</sup> | 1843.7 | 1843.7  | 1843.0 | 1840.5 | 1840.5  | 1837.6 |
| gdb 5151 | 1843.7 <sup>a</sup> | 1830.3 | 1830.3  | 1833.0 | 1832.3 | 1832.3  | 1832.9 |
| gdb 5152 | 1848.4 <sup>a</sup> | 1841.6 | 1841.6  | 1841.0 | 1840.4 | 1837.9  | 1835.1 |
| gdb 5153 | 1863.4 <sup>a</sup> | 1855.8 | 1855.8  | 1857.6 | 1856.7 | 1856.7  | 1858.6 |
| gdb 5154 | 1871.5 <sup>a</sup> | 1868.3 | 1868.3  | 1867.1 | 1864.9 | 1864.9  | 1863.2 |
| gdb 5155 | 1863.4 <sup>a</sup> | 1860.4 | 1860.4  | 1862.6 | 1860.6 | 1860.5  | 1863.8 |
| gdb 5156 | 1873.7 <sup>a</sup> | 1871.2 | 1871.1  | 1873.1 | 1873.6 | 1873.6  | 1874.6 |
| gdb 5157 | 1884.1 <sup>a</sup> | 1880.7 | 1880.7  | 1879.9 | 1876.1 | 1876.1  | 1873.8 |
| gdb 5158 | 1888.3 <sup>a</sup> | 1881.0 | 1881.0  | 1880.0 | 1878.0 | 1878.0  | 1875.5 |
| gdb 5159 | 1912.1 <sup>a</sup> | 1907.4 | 1907.4  | 1908.2 | 1905.3 | 1905.3  | 1907.2 |
| gdb 5160 | 1890.9 <sup>a</sup> | 1894.9 | 1894.8  | 1896.8 | 1894.8 | 1894.8  | 1896.6 |
| gdb 5161 | 1900.0 <sup>a</sup> | 1900.1 | 1900.1  | 1897.7 | 1896.7 | 1896.6  | 1893.1 |
| gdb 5162 | 1890.1 <sup>a</sup> | 1892.0 | 1892.0  | 1892.9 | 1892.2 | 1892.2  | 1893.5 |
| gdb 5163 | 1903.5 <sup>a</sup> | 1906.3 | 1906.3  | 1907.6 | 1908.1 | 1908.1  | 1907.7 |
| gdb 5164 | 1864.0 <sup>a</sup> | 1863.2 | 1863.2  | 1865.2 | 1859.4 | 1859.3  | 1863.5 |
| gdb 5165 | 1874.3 <sup>a</sup> | 1872.8 | 1872.8  | 1873.9 | 1871.1 | 1871.1  | 1873.4 |
| gdb 5166 | 1888.0 <sup>a</sup> | 1882.4 | 1882.4  | 1881.5 | 1878.3 | 1878.3  | 1875.8 |
| gdb 5167 | 1834.0 <sup>a</sup> | 1810.8 | 1810.8  | 1813.9 | 1811.5 | 1811.4  | 1812.1 |
| gdb 5168 | 1838.9 <sup>a</sup> | 1813.4 | 1813.4  | 1817.0 | 1814.2 | 1814.2  | 1814.9 |
| gdb 5169 | 1837.0 <sup>a</sup> | 1812.8 | 1812.8  | 1816.2 | 1812.9 | 1812.9  | 1813.2 |
| gdb 5170 | 1828.1 <sup>a</sup> | 1808.8 | 1808.8  | 1810.5 | 1804.6 | 1804.6  | 1803.2 |
| gdb 5171 | 1827.1 <sup>a</sup> | 1803.7 | 1803.6  | 1806.7 | 1800.0 | 1800.0  | 1802.2 |
| gdb 5172 | 1836.4 <sup>a</sup> | 1809.5 | 1809.5  | 1815.2 | 1809.7 | 1809.6  | 1813.7 |
| gdb 5173 | 1844.3 <sup>a</sup> | 1817.7 | 1817.7  | 1822.1 | 1820.9 | 1820.9  | 1822.7 |
| gdb 5174 | 1849.5 <sup>a</sup> | 1832.7 | 1832.7  | 1835.3 | 1833.3 | 1833.3  | 1834.4 |
| gdb 5175 | 1851.9 <sup>a</sup> | 1835.1 | 1835.1  | 1837.8 | 1835.8 | 1835.8  | 1836.7 |
| gdb 5176 | 1839.1 <sup>a</sup> | 1821.3 | 1821.3  | 1823.7 | 1819.2 | 1819.2  | 1821.9 |
| gdb 5177 | 1848.6 <sup>a</sup> | 1833.2 | 1833.2  | 1836.9 | 1833.0 | 1833.0  | 1835.8 |
| gdb 5178 | 1859.0 <sup>a</sup> | 1843.5 | 1843.5  | 1846.0 | 1845.4 | 1845.4  | 1846.1 |
| gdb 5179 | 1849.2 <sup>a</sup> | 1832.8 | 1832.8  | 1834.9 | 1833.0 | 1833.0  | 1833.7 |
| gdb 5180 | 1847.9 <sup>a</sup> | 1832.6 | 1832.6  | 1834.8 | 1833.1 | 1833.1  | 1833.3 |
| gdb 5181 | 1845.4 <sup>a</sup> | 1831.4 | 1831.4  | 1835.0 | 1831.2 | 1831.2  | 1833.9 |
| gdb 5182 | 1853.8 <sup>a</sup> | 1838.6 | 1838.6  | 1842.5 | 1842.2 | 1842.2  | 1843.4 |
| gdb 5183 | 1889.3 <sup>a</sup> | 1882.2 | 1882.2  | 1883.6 | 1875.9 | 1875.9  | 1878.0 |
| gdb 5184 | 1885.1 <sup>a</sup> | 1877.0 | 1877.0  | 1878.9 | 1870.4 | 1870.4  | 1874.1 |
| gdb 5185 | 1891.0 <sup>a</sup> | 1882.4 | 1882.4  | 1883.9 | 1880.3 | 1880.3  | 1881.4 |
| gdb 5186 | 1848.1 <sup>a</sup> | 1832.0 | 1832.0  | 1835.0 | 1832.0 | 1832.0  | 1833.3 |
| gdb 5187 | 1855.3 <sup>a</sup> | 1837.0 | 1836.9  | 1840.5 | 1836.9 | 1836.9  | 1837.9 |
| gdb 5188 | 1848.4 <sup>a</sup> | 1836.8 | 1836.8  | 1841.3 | 1835.4 | 1835.4  | 1838.2 |
| gdb 5189 | 1856.6 <sup>a</sup> | 1845.1 | 1845.1  | 1849.8 | 1847.1 | 1847.1  | 1848.3 |
| gdb 5190 | 1860.5 <sup>a</sup> | 1849.3 | 1849.3  | 1852.5 | 1846.0 | 1846.0  | 1848.9 |
| gdb 5191 | 1858.2 <sup>a</sup> | 1853.6 | 1853.6  | 1857.0 | 1848.8 | 1848.8  | 1852.8 |
| gdb 5192 | 1872.7 <sup>a</sup> | 1870.2 | 1870.2  | 1872.9 | 1868.2 | 1868.2  | 1869.7 |
| gdb 5193 | 1867.0 <sup>a</sup> | 1861.6 | 1861.6  | 1865.4 | 1860.3 | 1860.3  | 1863.1 |
| gdb 5194 | 1871.0 <sup>a</sup> | 1859.9 | 1859.9  | 1862.5 | 1859.8 | 1859.8  | 1860.9 |
| gdb 5195 | 1862.4 <sup>a</sup> | 1850.4 | 1850.4  | 1852.9 | 1844.6 | 1844.5  | 1845.7 |
| gdb 5196 | 1855.8 <sup>a</sup> | 1843.9 | 1843.9  | 1847.3 | 1838.2 | 1838.2  | 1841.9 |
| gdb 5197 | 1864.8 <sup>a</sup> | 1852.4 | 1852.4  | 1854.9 | 1849.8 | 1849.8  | 1851.5 |

... continued on next page ...

Table S73: ... continued from previous page ...

| Species  | Ref.                | OM2    | OM2-D3T | ODM2   | OM3    | OM3-D3T | ODM3   |
|----------|---------------------|--------|---------|--------|--------|---------|--------|
| gdb 5198 | 1866.3 <sup>a</sup> | 1857.0 | 1857.0  | 1861.2 | 1854.8 | 1854.8  | 1857.1 |
| gdb 5199 | 1867.1 <sup>a</sup> | 1854.6 | 1854.6  | 1858.2 | 1852.5 | 1852.5  | 1854.3 |
| gdb 5200 | 1833.2 <sup>a</sup> | 1808.5 | 1808.5  | 1812.3 | 1809.4 | 1809.4  | 1810.4 |
| gdb 5201 | 1836.1 <sup>a</sup> | 1810.4 | 1810.4  | 1814.2 | 1811.1 | 1811.1  | 1812.5 |
| gdb 5202 | 1837.9 <sup>a</sup> | 1811.2 | 1811.2  | 1817.9 | 1811.4 | 1811.4  | 1815.8 |
| gdb 5203 | 1841.8 <sup>a</sup> | 1817.3 | 1817.3  | 1822.9 | 1821.0 | 1820.9  | 1823.4 |
| gdb 5204 | 1846.7 <sup>a</sup> | 1830.5 | 1830.5  | 1833.7 | 1831.2 | 1831.2  | 1832.6 |
| gdb 5205 | 1854.7 <sup>a</sup> | 1834.3 | 1834.3  | 1838.1 | 1834.8 | 1834.8  | 1836.0 |
| gdb 5206 | 1845.8 <sup>a</sup> | 1832.0 | 1832.0  | 1836.6 | 1832.1 | 1832.1  | 1835.3 |
| gdb 5207 | 1855.0 <sup>a</sup> | 1843.3 | 1843.3  | 1848.0 | 1846.0 | 1846.0  | 1847.5 |
| gdb 5208 | 1849.3 <sup>a</sup> | 1832.4 | 1832.4  | 1834.8 | 1832.6 | 1832.6  | 1833.5 |
| gdb 5209 | 1852.0 <sup>a</sup> | 1834.0 | 1834.0  | 1836.6 | 1834.6 | 1834.5  | 1835.3 |
| gdb 5210 | 1848.9 <sup>a</sup> | 1830.5 | 1830.5  | 1833.4 | 1831.9 | 1831.9  | 1833.0 |
| gdb 5211 | 1847.6 <sup>a</sup> | 1832.2 | 1832.2  | 1836.0 | 1832.2 | 1832.2  | 1835.2 |
| gdb 5212 | 1855.1 <sup>a</sup> | 1839.6 | 1839.6  | 1843.6 | 1843.2 | 1843.2  | 1844.5 |
| gdb 5213 | 1836.8 <sup>a</sup> | 1812.3 | 1812.3  | 1815.7 | 1812.8 | 1812.8  | 1813.5 |
| gdb 5214 | 1836.3 <sup>a</sup> | 1811.8 | 1811.8  | 1815.3 | 1812.5 | 1812.5  | 1813.4 |
| gdb 5215 | 1839.8 <sup>a</sup> | 1815.3 | 1815.3  | 1818.9 | 1815.4 | 1815.3  | 1815.6 |
| gdb 5216 | 1828.4 <sup>a</sup> | 1809.1 | 1809.1  | 1810.9 | 1804.8 | 1804.8  | 1803.6 |
| gdb 5217 | 1839.0 <sup>a</sup> | 1812.0 | 1812.0  | 1817.7 | 1811.7 | 1811.7  | 1815.6 |
| gdb 5218 | 1829.7 <sup>a</sup> | 1805.8 | 1805.8  | 1809.1 | 1802.3 | 1802.3  | 1804.5 |
| gdb 5219 | 1846.1 <sup>a</sup> | 1819.9 | 1819.9  | 1825.6 | 1823.7 | 1823.6  | 1825.8 |
| gdb 5220 | 1852.6 <sup>a</sup> | 1838.1 | 1838.1  | 1840.9 | 1833.9 | 1833.9  | 1834.9 |
| gdb 5221 | 1856.3 <sup>a</sup> | 1835.8 | 1836.3  | 1841.5 | 1832.3 | 1832.2  | 1837.4 |
| gdb 5222 | 1862.2 <sup>a</sup> | 1844.2 | 1844.2  | 1849.4 | 1843.7 | 1843.7  | 1846.9 |
| gdb 5223 | 1858.4 <sup>a</sup> | 1842.9 | 1842.9  | 1845.3 | 1842.3 | 1842.3  | 1842.3 |
| gdb 5224 | 1850.0 <sup>a</sup> | 1845.4 | 1845.4  | 1849.9 | 1839.2 | 1839.2  | 1844.1 |
| gdb 5225 | 1859.3 <sup>a</sup> | 1854.0 | 1854.0  | 1858.3 | 1851.3 | 1851.3  | 1854.0 |
| gdb 5226 | 1856.5 <sup>a</sup> | 1851.3 | 1851.3  | 1856.1 | 1848.7 | 1848.7  | 1852.1 |
| gdb 5227 | 1848.8 <sup>a</sup> | 1831.1 | 1831.1  | 1833.9 | 1831.9 | 1831.9  | 1833.2 |
| gdb 5228 | 1848.6 <sup>a</sup> | 1830.9 | 1830.8  | 1833.7 | 1831.5 | 1831.5  | 1833.0 |
| gdb 5229 | 1848.1 <sup>a</sup> | 1828.9 | 1828.8  | 1832.0 | 1830.5 | 1830.5  | 1831.8 |
| gdb 5230 | 1844.7 <sup>a</sup> | 1826.7 | 1826.7  | 1830.4 | 1827.8 | 1827.7  | 1830.8 |
| gdb 5231 | 1838.5 <sup>a</sup> | 1819.2 | 1819.2  | 1822.0 | 1817.3 | 1817.3  | 1820.4 |
| gdb 5232 | 1856.8 <sup>a</sup> | 1840.2 | 1840.2  | 1844.2 | 1843.7 | 1843.7  | 1845.1 |
| gdb 5233 | 1848.2 <sup>a</sup> | 1831.6 | 1831.6  | 1834.0 | 1832.3 | 1832.3  | 1833.4 |
| gdb 5234 | 1845.8 <sup>a</sup> | 1829.0 | 1829.0  | 1831.5 | 1829.6 | 1829.6  | 1830.9 |
| gdb 5235 | 1843.8 <sup>a</sup> | 1827.3 | 1827.3  | 1829.9 | 1827.8 | 1827.8  | 1828.9 |
| gdb 5236 | 1846.9 <sup>a</sup> | 1830.5 | 1830.5  | 1832.8 | 1831.5 | 1831.4  | 1831.9 |
| gdb 5237 | 1842.1 <sup>a</sup> | 1826.7 | 1826.7  | 1830.3 | 1827.9 | 1827.9  | 1830.8 |
| gdb 5238 | 1835.7 <sup>a</sup> | 1817.9 | 1817.9  | 1820.1 | 1815.8 | 1815.8  | 1818.6 |
| gdb 5239 | 1852.1 <sup>a</sup> | 1837.5 | 1837.5  | 1840.1 | 1841.1 | 1841.1  | 1842.1 |
| gdb 5240 | 1884.9 <sup>a</sup> | 1876.9 | 1876.9  | 1878.8 | 1870.8 | 1870.8  | 1873.5 |
| gdb 5241 | 1887.6 <sup>a</sup> | 1879.2 | 1879.2  | 1880.7 | 1873.1 | 1873.1  | 1875.5 |
| gdb 5242 | 1877.5 <sup>a</sup> | 1868.5 | 1868.5  | 1871.2 | 1865.0 | 1865.0  | 1868.6 |
| gdb 5243 | 1889.8 <sup>a</sup> | 1880.2 | 1880.2  | 1883.2 | 1879.4 | 1879.4  | 1881.5 |
| gdb 5244 | 1892.3 <sup>a</sup> | 1882.4 | 1882.4  | 1885.0 | 1881.8 | 1881.7  | 1883.4 |
| gdb 5245 | 1863.0 <sup>a</sup> | 1851.2 | 1851.2  | 1853.4 | 1845.2 | 1845.2  | 1846.1 |
| gdb 5246 | 1855.9 <sup>a</sup> | 1844.2 | 1844.2  | 1847.5 | 1838.0 | 1838.0  | 1843.1 |
| gdb 5247 | 1855.1 <sup>a</sup> | 1846.4 | 1846.3  | 1850.5 | 1840.2 | 1840.2  | 1844.4 |
| gdb 5248 | 1864.8 <sup>a</sup> | 1852.0 | 1852.0  | 1854.3 | 1849.6 | 1849.6  | 1851.1 |
| gdb 5249 | 1862.9 <sup>a</sup> | 1854.1 | 1854.1  | 1858.6 | 1852.0 | 1851.9  | 1854.7 |
| gdb 5250 | 1867.1 <sup>a</sup> | 1854.3 | 1854.3  | 1857.8 | 1852.3 | 1852.3  | 1854.1 |
| gdb 5251 | 1860.6 <sup>a</sup> | 1848.2 | 1848.2  | 1851.0 | 1845.6 | 1845.6  | 1848.2 |
| gdb 5252 | 1858.7 <sup>a</sup> | 1851.4 | 1851.4  | 1854.5 | 1847.3 | 1847.3  | 1851.5 |
| gdb 5253 | 1860.6 <sup>a</sup> | 1855.8 | 1855.8  | 1858.9 | 1851.6 | 1851.6  | 1855.6 |
| gdb 5254 | 1867.9 <sup>a</sup> | 1861.2 | 1861.2  | 1864.5 | 1860.6 | 1860.6  | 1863.1 |
| gdb 5255 | 1869.7 <sup>a</sup> | 1865.9 | 1865.9  | 1869.0 | 1864.6 | 1864.6  | 1866.7 |
| gdb 5256 | 1868.8 <sup>a</sup> | 1858.3 | 1858.3  | 1860.8 | 1859.0 | 1859.0  | 1860.1 |
| gdb 5257 | 1873.2 <sup>a</sup> | 1868.9 | 1868.9  | 1872.1 | 1868.3 | 1868.2  | 1871.2 |
| gdb 5258 | 1885.2 <sup>a</sup> | 1882.2 | 1882.2  | 1884.6 | 1884.2 | 1884.2  | 1885.3 |
| gdb 5259 | 1888.6 <sup>a</sup> | 1896.7 | 1896.7  | 1897.5 | 1886.1 | 1886.1  | 1888.8 |
| gdb 5260 | 1889.9 <sup>a</sup> | 1898.2 | 1898.2  | 1898.8 | 1887.9 | 1887.9  | 1890.3 |
| gdb 5261 | 1884.5 <sup>a</sup> | 1887.2 | 1887.2  | 1889.4 | 1878.6 | 1878.6  | 1883.4 |
| gdb 5262 | 1887.4 <sup>a</sup> | 1891.3 | 1891.3  | 1892.7 | 1881.9 | 1881.9  | 1885.4 |

... continued on next page ...

Table S73: ... continued from previous page ...

| Species  | Ref.                | OM2    | OM2-D3T | ODM2   | OM3    | OM3-D3T | ODM3   |
|----------|---------------------|--------|---------|--------|--------|---------|--------|
| gdb 5263 | 1879.0 <sup>a</sup> | 1882.5 | 1882.5  | 1885.5 | 1875.1 | 1875.1  | 1879.7 |
| gdb 5264 | 1889.4 <sup>a</sup> | 1892.6 | 1892.6  | 1895.6 | 1888.6 | 1888.5  | 1891.3 |
| gdb 5265 | 1893.6 <sup>a</sup> | 1897.1 | 1897.0  | 1899.0 | 1892.7 | 1892.7  | 1894.0 |
| gdb 5266 | 1887.6 <sup>a</sup> | 1890.4 | 1890.4  | 1893.8 | 1886.7 | 1886.7  | 1890.0 |
| gdb 5267 | 1869.3 <sup>a</sup> | 1870.5 | 1870.5  | 1874.1 | 1868.3 | 1868.3  | 1870.6 |
| gdb 5268 | 1868.1 <sup>a</sup> | 1864.0 | 1864.0  | 1866.6 | 1862.2 | 1862.2  | 1863.7 |
| gdb 5269 | 1879.7 <sup>a</sup> | 1878.3 | 1878.3  | 1881.0 | 1877.5 | 1877.5  | 1880.0 |
| gdb 5270 | 1900.7 <sup>a</sup> | 1887.9 | 1887.9  | 1889.8 | 1886.2 | 1886.2  | 1888.7 |
| gdb 5271 | 1873.9 <sup>a</sup> | 1873.9 | 1873.9  | 1876.4 | 1872.8 | 1872.8  | 1875.2 |
| gdb 5272 | 1873.7 <sup>a</sup> | 1880.2 | 1880.2  | 1883.2 | 1878.2 | 1878.2  | 1881.5 |
| gdb 5273 | 1881.0 <sup>a</sup> | 1885.9 | 1885.9  | 1889.3 | 1887.6 | 1887.6  | 1889.5 |
| gdb 5274 | 1841.7 <sup>a</sup> | 1833.6 | 1833.6  | 1833.4 | 1825.8 | 1825.8  | 1824.8 |
| gdb 5275 | 1843.8 <sup>a</sup> | 1835.8 | 1835.8  | 1835.7 | 1827.8 | 1827.8  | 1826.7 |
| gdb 5276 | 1838.6 <sup>a</sup> | 1838.2 | 1838.2  | 1838.4 | 1829.4 | 1829.3  | 1828.9 |
| gdb 5277 | 1837.6 <sup>a</sup> | 1832.6 | 1832.6  | 1835.4 | 1826.5 | 1826.5  | 1829.5 |
| gdb 5278 | 1847.4 <sup>a</sup> | 1844.9 | 1844.9  | 1844.9 | 1845.6 | 1840.0  | 1840.0 |
| gdb 5279 | 1846.5 <sup>a</sup> | 1838.8 | 1838.8  | 1842.0 | 1837.0 | 1837.0  | 1838.8 |
| gdb 5280 | 1849.7 <sup>a</sup> | 1841.2 | 1841.2  | 1844.3 | 1839.6 | 1839.6  | 1840.9 |
| gdb 5281 | 1865.3 <sup>a</sup> | 1856.2 | 1856.2  | 1858.2 | 1856.8 | 1856.8  | 1858.9 |
| gdb 5282 | 1868.4 <sup>a</sup> | 1858.3 | 1858.2  | 1860.4 | 1859.1 | 1859.1  | 1861.1 |
| gdb 5283 | 1864.8 <sup>a</sup> | 1861.3 | 1861.3  | 1863.7 | 1861.3 | 1861.2  | 1864.4 |
| gdb 5284 | 1871.8 <sup>a</sup> | 1871.9 | 1871.8  | 1874.4 | 1873.8 | 1873.8  | 1874.9 |
| gdb 5285 | 1872.3 <sup>a</sup> | 1872.6 | 1872.6  | 1875.2 | 1866.1 | 1866.1  | 1870.4 |
| gdb 5286 | 1886.0 <sup>a</sup> | 1883.1 | 1883.1  | 1886.3 | 1880.7 | 1880.7  | 1883.3 |
| gdb 5287 | 1881.6 <sup>a</sup> | 1878.9 | 1878.9  | 1882.3 | 1876.2 | 1876.2  | 1879.4 |
| gdb 5288 | 1898.5 <sup>a</sup> | 1886.9 | 1886.9  | 1888.7 | 1884.8 | 1884.8  | 1887.2 |
| gdb 5289 | 1877.5 <sup>a</sup> | 1876.9 | 1876.9  | 1879.5 | 1875.9 | 1875.9  | 1878.5 |
| gdb 5290 | 1877.3 <sup>a</sup> | 1877.2 | 1877.2  | 1879.4 | 1875.7 | 1875.7  | 1877.6 |
| gdb 5291 | 1871.8 <sup>a</sup> | 1880.0 | 1880.0  | 1882.7 | 1877.4 | 1877.4  | 1880.1 |
| gdb 5292 | 1882.2 <sup>a</sup> | 1886.9 | 1886.9  | 1890.1 | 1888.4 | 1888.4  | 1890.0 |
| gdb 5293 | 1874.8 <sup>a</sup> | 1874.0 | 1874.0  | 1876.7 | 1867.5 | 1867.5  | 1871.7 |
| gdb 5294 | 1883.3 <sup>a</sup> | 1880.7 | 1880.7  | 1884.1 | 1878.1 | 1878.0  | 1881.1 |
| gdb 5295 | 1883.1 <sup>a</sup> | 1880.4 | 1880.3  | 1883.7 | 1877.4 | 1877.4  | 1880.1 |
| gdb 5296 | 1849.1 <sup>a</sup> | 1835.9 | 1835.9  | 1838.8 | 1831.2 | 1831.2  | 1832.6 |
| gdb 5297 | 1851.4 <sup>a</sup> | 1838.9 | 1838.9  | 1841.2 | 1834.3 | 1834.3  | 1835.2 |
| gdb 5298 | 1844.9 <sup>a</sup> | 1834.1 | 1834.1  | 1836.4 | 1829.4 | 1829.4  | 1831.1 |
| gdb 5299 | 1852.7 <sup>a</sup> | 1835.6 | 1835.6  | 1840.8 | 1831.2 | 1831.2  | 1836.3 |
| gdb 5300 | 1854.5 <sup>a</sup> | 1840.7 | 1840.7  | 1843.3 | 1839.6 | 1839.6  | 1840.1 |
| gdb 5301 | 1860.2 <sup>a</sup> | 1843.4 | 1843.4  | 1848.9 | 1842.6 | 1842.6  | 1846.3 |
| gdb 5302 | 1864.0 <sup>a</sup> | 1847.1 | 1847.0  | 1851.9 | 1846.4 | 1846.4  | 1849.4 |
| gdb 5303 | 1859.5 <sup>a</sup> | 1847.9 | 1847.9  | 1850.7 | 1845.1 | 1845.0  | 1848.0 |
| gdb 5304 | 1856.3 <sup>a</sup> | 1845.5 | 1845.5  | 1847.9 | 1842.5 | 1842.5  | 1845.8 |
| gdb 5305 | 1857.0 <sup>a</sup> | 1854.3 | 1854.3  | 1857.4 | 1850.0 | 1849.9  | 1853.8 |
| gdb 5306 | 1867.7 <sup>a</sup> | 1856.1 | 1856.0  | 1859.0 | 1856.2 | 1856.2  | 1858.0 |
| gdb 5307 | 1869.3 <sup>a</sup> | 1866.0 | 1866.0  | 1869.6 | 1864.3 | 1864.3  | 1866.8 |
| gdb 5308 | 1869.5 <sup>a</sup> | 1863.3 | 1863.3  | 1866.6 | 1862.7 | 1862.7  | 1865.1 |
| gdb 5309 | 1914.1 <sup>a</sup> | 1918.4 | 1918.4  | 1919.8 | 1920.5 | 1920.5  | 1920.6 |
| gdb 5310 | 1925.3 <sup>a</sup> | 1919.8 | 1919.8  | 1920.6 | 1917.9 | 1917.9  | 1919.8 |
| gdb 5311 | 1860.5 <sup>a</sup> | 1861.1 | 1861.1  | 1861.3 | 1858.2 | 1858.2  | 1857.9 |
| gdb 5312 | 1882.0 <sup>a</sup> | 1881.2 | 1881.2  | 1879.9 | 1877.0 | 1876.9  | 1874.5 |
| gdb 5313 | 1909.4 <sup>a</sup> | 1918.1 | 1918.1  | 1919.4 | 1920.5 | 1920.4  | 1921.2 |
| gdb 5314 | 1882.5 <sup>a</sup> | 1882.1 | 1882.1  | 1880.9 | 1877.9 | 1877.9  | 1875.4 |
| gdb 5315 | 1914.0 <sup>a</sup> | 1919.6 | 1919.6  | 1921.5 | 1921.6 | 1921.6  | 1921.7 |
| gdb 5316 | 1925.8 <sup>a</sup> | 1920.2 | 1920.1  | 1920.8 | 1918.1 | 1918.0  | 1920.0 |
| gdb 5317 | 1896.2 <sup>a</sup> | 1903.0 | 1903.0  | 1904.2 | 1901.4 | 1901.4  | 1903.4 |
| gdb 5318 | 1902.9 <sup>a</sup> | 1907.8 | 1907.8  | 1908.9 | 1909.8 | 1909.8  | 1910.1 |
| gdb 5319 | 1864.9 <sup>a</sup> | 1866.9 | 1866.9  | 1869.2 | 1865.2 | 1865.2  | 1867.0 |
| gdb 5320 | 1864.3 <sup>a</sup> | 1860.8 | 1860.8  | 1861.9 | 1859.6 | 1859.6  | 1860.5 |
| gdb 5321 | 1911.5 <sup>a</sup> | 1915.8 | 1915.8  | 1917.4 | 1917.4 | 1917.4  | 1917.9 |
| gdb 5322 | 1913.7 <sup>a</sup> | 1917.5 | 1917.5  | 1918.4 | 1919.0 | 1919.0  | 1918.8 |
| gdb 5323 | 1910.2 <sup>a</sup> | 1914.9 | 1914.9  | 1916.4 | 1916.4 | 1916.4  | 1917.1 |
| gdb 5324 | 1912.6 <sup>a</sup> | 1917.2 | 1917.2  | 1918.3 | 1918.6 | 1918.6  | 1919.0 |
| gdb 5325 | 1925.0 <sup>a</sup> | 1920.0 | 1920.0  | 1920.9 | 1917.7 | 1917.7  | 1920.0 |
| gdb 5326 | 1902.1 <sup>a</sup> | 1907.5 | 1907.5  | 1908.8 | 1905.4 | 1905.4  | 1907.4 |
| gdb 5327 | 1918.8 <sup>a</sup> | 1915.6 | 1915.6  | 1916.2 | 1912.9 | 1912.9  | 1915.5 |

... continued on next page ...

Table S73: ... continued from previous page ...

| Species  | Ref.                | OM2    | OM2-D3T | ODM2   | OM3    | OM3-D3T | ODM3   |
|----------|---------------------|--------|---------|--------|--------|---------|--------|
| gdb 5328 | 1912.0 <sup>a</sup> | 1915.7 | 1915.7  | 1917.0 | 1917.3 | 1917.3  | 1917.5 |
| gdb 5329 | 1907.8 <sup>a</sup> | 1915.5 | 1915.5  | 1917.1 | 1917.3 | 1917.3  | 1918.2 |
| gdb 5330 | 1908.1 <sup>a</sup> | 1914.7 | 1914.7  | 1915.3 | 1916.3 | 1916.3  | 1916.4 |
| gdb 5331 | 1880.6 <sup>a</sup> | 1879.3 | 1879.3  | 1878.4 | 1874.7 | 1874.6  | 1872.5 |
| gdb 5332 | 1881.1 <sup>a</sup> | 1880.5 | 1880.5  | 1879.7 | 1875.5 | 1875.5  | 1872.7 |
| gdb 5333 | 1885.9 <sup>a</sup> | 1886.7 | 1886.7  | 1889.8 | 1887.3 | 1887.3  | 1887.7 |
| gdb 5334 | 1911.4 <sup>a</sup> | 1915.7 | 1915.7  | 1917.1 | 1917.4 | 1917.4  | 1917.9 |
| gdb 5335 | 1925.2 <sup>a</sup> | 1919.6 | 1919.6  | 1920.4 | 1917.2 | 1917.2  | 1919.3 |
| gdb 5336 | 1912.9 <sup>a</sup> | 1917.2 | 1917.2  | 1919.2 | 1918.8 | 1918.8  | 1919.3 |
| gdb 5337 | 1894.2 <sup>a</sup> | 1903.1 | 1903.1  | 1904.6 | 1901.6 | 1901.6  | 1903.7 |
| gdb 5338 | 1900.2 <sup>a</sup> | 1906.2 | 1906.2  | 1907.7 | 1908.4 | 1908.4  | 1909.5 |
| gdb 5339 | 1863.1 <sup>a</sup> | 1862.4 | 1862.4  | 1862.5 | 1859.0 | 1859.0  | 1858.8 |
| gdb 5340 | 1870.8 <sup>a</sup> | 1866.8 | 1866.8  | 1871.3 | 1867.9 | 1867.9  | 1869.8 |
| gdb 5341 | 1884.3 <sup>a</sup> | 1880.8 | 1880.8  | 1879.8 | 1876.8 | 1876.8  | 1874.6 |
| gdb 5342 | 1884.2 <sup>a</sup> | 1882.9 | 1882.9  | 1885.5 | 1885.3 | 1885.3  | 1885.9 |
| gdb 5343 | 1874.9 <sup>a</sup> | 1876.4 | 1876.4  | 1879.0 | 1875.9 | 1875.9  | 1877.3 |
| gdb 5344 | 1881.2 <sup>a</sup> | 1879.9 | 1879.9  | 1878.7 | 1876.0 | 1876.0  | 1873.3 |
| gdb 5345 | 1883.4 <sup>a</sup> | 1882.3 | 1882.3  | 1884.6 | 1884.7 | 1884.7  | 1885.3 |
| gdb 5346 | 1879.5 <sup>a</sup> | 1878.2 | 1878.2  | 1880.8 | 1875.1 | 1875.1  | 1877.0 |
| gdb 5347 | 1863.9 <sup>a</sup> | 1862.9 | 1862.9  | 1864.6 | 1859.6 | 1859.6  | 1860.2 |
| gdb 5348 | 1871.4 <sup>a</sup> | 1867.3 | 1867.3  | 1871.9 | 1868.2 | 1868.2  | 1870.1 |
| gdb 5349 | 1859.5 <sup>a</sup> | 1860.4 | 1860.4  | 1862.0 | 1857.1 | 1857.1  | 1857.7 |
| gdb 5350 | 1864.8 <sup>a</sup> | 1864.1 | 1864.1  | 1866.3 | 1860.9 | 1860.8  | 1861.1 |
| gdb 5351 | 1869.4 <sup>a</sup> | 1865.8 | 1865.8  | 1869.7 | 1866.5 | 1866.5  | 1868.4 |
| gdb 5352 | 1884.4 <sup>a</sup> | 1880.9 | 1880.9  | 1879.9 | 1876.9 | 1876.9  | 1874.8 |
| gdb 5353 | 1884.8 <sup>a</sup> | 1883.4 | 1883.4  | 1886.0 | 1885.9 | 1885.9  | 1886.6 |
| gdb 5354 | 1879.6 <sup>a</sup> | 1877.9 | 1877.9  | 1877.1 | 1873.1 | 1873.1  | 1871.2 |
| gdb 5355 | 1881.2 <sup>a</sup> | 1880.2 | 1880.2  | 1879.7 | 1875.1 | 1875.1  | 1872.8 |
| gdb 5356 | 1885.1 <sup>a</sup> | 1887.3 | 1887.3  | 1890.3 | 1887.5 | 1887.4  | 1887.8 |
| gdb 5357 | 1875.0 <sup>a</sup> | 1876.4 | 1876.4  | 1878.7 | 1875.2 | 1875.2  | 1877.4 |
| gdb 5358 | 1881.9 <sup>a</sup> | 1879.6 | 1879.6  | 1878.5 | 1876.2 | 1876.2  | 1873.8 |
| gdb 5359 | 1886.0 <sup>a</sup> | 1895.5 | 1895.5  | 1896.1 | 1885.6 | 1885.6  | 1887.9 |
| gdb 5360 | 1885.8 <sup>a</sup> | 1895.4 | 1895.4  | 1896.0 | 1885.6 | 1885.5  | 1887.9 |
| gdb 5361 | 1888.2 <sup>a</sup> | 1891.4 | 1891.4  | 1894.5 | 1888.6 | 1888.6  | 1891.3 |
| gdb 5362 | 1890.3 <sup>a</sup> | 1895.4 | 1895.4  | 1897.4 | 1891.6 | 1891.6  | 1892.8 |
| gdb 5363 | 1888.0 <sup>a</sup> | 1892.2 | 1892.2  | 1895.2 | 1889.3 | 1889.3  | 1891.8 |
| gdb 5364 | 1882.2 <sup>a</sup> | 1880.4 | 1880.4  | 1883.4 | 1878.6 | 1878.6  | 1881.1 |
| gdb 5365 | 1881.3 <sup>a</sup> | 1879.4 | 1879.4  | 1882.3 | 1877.6 | 1877.5  | 1880.0 |
| gdb 5366 | 1882.5 <sup>a</sup> | 1882.7 | 1882.7  | 1885.3 | 1881.1 | 1881.1  | 1883.9 |
| gdb 5367 | 1907.3 <sup>a</sup> | 1915.3 | 1915.3  | 1917.1 | 1916.9 | 1916.9  | 1918.0 |
| gdb 5368 | 1908.0 <sup>a</sup> | 1914.7 | 1914.7  | 1915.6 | 1916.2 | 1916.2  | 1916.4 |
| gdb 5369 | 1914.5 <sup>a</sup> | 1915.5 | 1915.5  | 1916.0 | 1913.1 | 1913.1  | 1915.9 |
| gdb 5370 | 1909.0 <sup>a</sup> | 1915.0 | 1915.0  | 1916.3 | 1917.4 | 1917.3  | 1918.0 |
| gdb 5371 | 1911.5 <sup>a</sup> | 1916.0 | 1915.9  | 1917.4 | 1917.4 | 1917.4  | 1917.7 |
| gdb 5372 | 1913.2 <sup>a</sup> | 1916.2 | 1916.2  | 1917.0 | 1917.5 | 1917.5  | 1917.3 |
| gdb 5373 | 1900.1 <sup>a</sup> | 1906.1 | 1906.1  | 1907.7 | 1908.5 | 1908.5  | 1909.6 |
| gdb 5374 | 1883.6 <sup>a</sup> | 1880.9 | 1880.9  | 1879.9 | 1876.9 | 1876.8  | 1874.7 |
| gdb 5375 | 1884.8 <sup>a</sup> | 1883.3 | 1883.3  | 1885.9 | 1885.8 | 1885.7  | 1886.4 |
| gdb 5376 | 1880.7 <sup>a</sup> | 1881.6 | 1881.6  | 1880.6 | 1877.8 | 1877.8  | 1875.5 |
| gdb 5377 | 1882.9 <sup>a</sup> | 1882.0 | 1882.0  | 1884.4 | 1884.5 | 1884.4  | 1885.2 |
| gdb 5378 | 1884.0 <sup>a</sup> | 1880.6 | 1880.5  | 1879.8 | 1876.3 | 1876.2  | 1874.3 |
| gdb 5379 | 1885.2 <sup>a</sup> | 1884.5 | 1884.5  | 1887.3 | 1886.7 | 1886.7  | 1887.0 |
| gdb 5380 | 1879.6 <sup>a</sup> | 1879.0 | 1879.0  | 1881.6 | 1875.8 | 1875.8  | 1877.6 |
| gdb 5381 | 1885.9 <sup>a</sup> | 1880.4 | 1880.4  | 1879.5 | 1877.7 | 1877.7  | 1875.5 |
| gdb 5382 | 1881.8 <sup>a</sup> | 1880.7 | 1880.7  | 1883.7 | 1878.8 | 1878.8  | 1881.2 |
| gdb 5383 | 1882.3 <sup>a</sup> | 1880.3 | 1880.3  | 1883.4 | 1878.6 | 1878.5  | 1881.1 |
| gdb 5384 | 1915.0 <sup>a</sup> | 1915.5 | 1915.5  | 1916.1 | 1913.3 | 1913.2  | 1916.1 |
| gdb 5385 | 1908.9 <sup>a</sup> | 1914.6 | 1914.6  | 1915.5 | 1917.0 | 1917.0  | 1917.7 |
| gdb 5386 | 1881.0 <sup>a</sup> | 1879.2 | 1879.2  | 1877.1 | 1874.8 | 1874.8  | 1871.7 |
| gdb 5387 | 1875.2 <sup>a</sup> | 1876.6 | 1876.6  | 1879.4 | 1875.8 | 1875.8  | 1877.4 |
| gdb 5388 | 1893.8 <sup>a</sup> | 1903.1 | 1903.1  | 1905.0 | 1901.4 | 1901.3  | 1903.9 |
| gdb 5389 | 1900.4 <sup>a</sup> | 1906.1 | 1906.4  | 1908.4 | 1908.0 | 1908.0  | 1909.2 |
| gdb 5390 | 1881.4 <sup>a</sup> | 1880.2 | 1880.1  | 1879.1 | 1876.6 | 1876.6  | 1874.2 |
| gdb 5391 | 1874.5 <sup>a</sup> | 1876.1 | 1876.1  | 1878.4 | 1875.1 | 1875.1  | 1877.3 |
| gdb 5392 | 1918.4 <sup>a</sup> | 1915.2 | 1915.1  | 1915.8 | 1912.0 | 1911.9  | 1914.4 |

... continued on next page ...

Table S73: ... continued from previous page ...

| Species  | Ref.                | OM2    | OM2-D3T | ODM2   | OM3    | OM3-D3T | ODM3   |
|----------|---------------------|--------|---------|--------|--------|---------|--------|
| gdb 5393 | 1901.7 <sup>a</sup> | 1906.3 | 1906.3  | 1907.6 | 1904.0 | 1904.0  | 1906.1 |
| gdb 5394 | 1913.0 <sup>a</sup> | 1916.7 | 1916.7  | 1916.7 | 1918.0 | 1917.5  | 1917.6 |
| gdb 5395 | 1881.7 <sup>a</sup> | 1881.8 | 1881.8  | 1884.4 | 1880.1 | 1880.1  | 1883.0 |
| gdb 5396 | 1882.1 <sup>a</sup> | 1876.9 | 1876.9  | 1879.0 | 1880.0 | 1880.0  | 1880.6 |
| gdb 5397 | 1880.2 <sup>a</sup> | 1875.8 | 1875.8  | 1878.4 | 1880.0 | 1880.0  | 1880.6 |
| gdb 5398 | 1876.1 <sup>a</sup> | 1871.6 | 1871.5  | 1870.3 | 1868.9 | 1868.9  | 1866.4 |
| gdb 5399 | 1872.4 <sup>a</sup> | 1869.5 | 1869.4  | 1870.6 | 1868.5 | 1868.4  | 1870.3 |
| gdb 5400 | 1875.9 <sup>a</sup> | 1877.9 | 1877.9  | 1876.8 | 1875.4 | 1875.4  | 1873.3 |
| gdb 5401 | 1893.6 <sup>a</sup> | 1878.6 | 1878.6  | 1879.8 | 1879.3 | 1879.3  | 1880.8 |
| gdb 5402 | 1866.0 <sup>a</sup> | 1873.3 | 1873.3  | 1874.5 | 1872.0 | 1871.9  | 1873.8 |
| gdb 5403 | 1878.7 <sup>a</sup> | 1883.2 | 1883.2  | 1885.7 | 1885.8 | 1885.8  | 1886.5 |
| gdb 5404 | 1910.6 <sup>a</sup> | 1917.7 | 1917.7  | 1919.5 | 1919.0 | 1919.0  | 1920.1 |
| gdb 5405 | 1897.1 <sup>a</sup> | 1904.6 | 1904.6  | 1906.2 | 1902.7 | 1902.6  | 1905.2 |
| gdb 5406 | 1920.9 <sup>a</sup> | 1934.8 | 1934.8  | 1935.2 | 1937.8 | 1937.8  | 1938.1 |
| gdb 5407 | 1857.5 <sup>a</sup> | 1852.4 | 1852.3  | 1855.9 | 1854.3 | 1854.3  | 1855.5 |
| gdb 5408 | 1848.1 <sup>a</sup> | 1842.9 | 1842.9  | 1845.5 | 1841.8 | 1841.7  | 1844.1 |
| gdb 5409 | 1855.2 <sup>a</sup> | 1851.4 | 1851.4  | 1854.4 | 1852.9 | 1852.8  | 1853.7 |
| gdb 5410 | 1856.4 <sup>a</sup> | 1851.6 | 1851.6  | 1855.0 | 1853.0 | 1852.9  | 1854.0 |
| gdb 5411 | 1854.2 <sup>a</sup> | 1850.4 | 1850.4  | 1853.5 | 1852.5 | 1852.4  | 1853.1 |
| gdb 5412 | 1844.6 <sup>a</sup> | 1840.1 | 1840.0  | 1842.6 | 1838.9 | 1838.8  | 1841.3 |
| gdb 5413 | 1845.5 <sup>a</sup> | 1840.9 | 1840.9  | 1843.4 | 1839.4 | 1839.4  | 1841.8 |
| gdb 5414 | 1858.2 <sup>a</sup> | 1855.0 | 1855.0  | 1857.5 | 1858.4 | 1858.4  | 1858.1 |
| gdb 5415 | 1847.2 <sup>a</sup> | 1843.3 | 1843.3  | 1845.7 | 1843.7 | 1843.6  | 1845.1 |
| gdb 5416 | 1842.9 <sup>a</sup> | 1840.0 | 1840.0  | 1842.3 | 1839.8 | 1839.7  | 1842.0 |
| gdb 5417 | 1852.9 <sup>a</sup> | 1850.0 | 1849.9  | 1853.3 | 1852.6 | 1852.5  | 1853.6 |
| gdb 5418 | 1912.1 <sup>a</sup> | 1914.9 | 1914.9  | 1917.2 | 1915.8 | 1915.8  | 1917.1 |
| gdb 5419 | 1910.2 <sup>a</sup> | 1913.8 | 1913.8  | 1915.3 | 1914.8 | 1914.8  | 1915.9 |
| gdb 5420 | 1897.2 <sup>a</sup> | 1902.0 | 1902.0  | 1904.0 | 1899.4 | 1899.3  | 1902.1 |
| gdb 5421 | 1852.6 <sup>a</sup> | 1850.3 | 1850.3  | 1854.3 | 1848.0 | 1847.9  | 1850.9 |
| gdb 5422 | 1845.1 <sup>a</sup> | 1844.4 | 1844.3  | 1847.1 | 1837.5 | 1837.5  | 1841.4 |
| gdb 5423 | 1851.7 <sup>a</sup> | 1855.3 | 1855.3  | 1859.6 | 1851.2 | 1851.2  | 1854.6 |
| gdb 5424 | 1859.1 <sup>a</sup> | 1860.7 | 1860.7  | 1865.0 | 1860.8 | 1860.8  | 1862.8 |
| gdb 5425 | 1892.4 <sup>a</sup> | 1896.3 | 1896.3  | 1896.5 | 1899.9 | 1899.9  | 1900.6 |
| gdb 5426 | 1843.7 <sup>a</sup> | 1840.1 | 1840.1  | 1842.8 | 1839.1 | 1839.1  | 1841.4 |
| gdb 5427 | 1831.7 <sup>a</sup> | 1828.4 | 1828.4  | 1830.3 | 1824.1 | 1824.1  | 1828.0 |
| gdb 5428 | 1855.4 <sup>a</sup> | 1850.7 | 1850.7  | 1854.3 | 1852.3 | 1852.2  | 1853.3 |
| gdb 5429 | 1898.6 <sup>a</sup> | 1905.1 | 1905.1  | 1906.6 | 1908.4 | 1908.4  | 1910.1 |
| gdb 5430 | 1881.8 <sup>a</sup> | 1875.5 | 1875.5  | 1878.0 | 1879.0 | 1879.0  | 1880.1 |
| gdb 5431 | 1880.4 <sup>a</sup> | 1874.2 | 1874.2  | 1877.0 | 1879.0 | 1879.0  | 1880.1 |
| gdb 5432 | 1892.1 <sup>a</sup> | 1868.2 | 1868.1  | 1869.8 | 1869.4 | 1869.4  | 1871.5 |
| gdb 5433 | 1871.4 <sup>a</sup> | 1864.9 | 1864.8  | 1866.6 | 1865.7 | 1865.6  | 1868.1 |
| gdb 5434 | 1868.0 <sup>a</sup> | 1849.3 | 1849.3  | 1853.6 | 1854.0 | 1854.0  | 1856.2 |
| gdb 5435 | 1870.2 <sup>a</sup> | 1850.0 | 1849.9  | 1854.0 | 1854.7 | 1854.6  | 1857.1 |
| gdb 5436 | 1861.1 <sup>a</sup> | 1841.5 | 1841.5  | 1845.0 | 1842.6 | 1842.6  | 1846.6 |
| gdb 5437 | 1880.5 <sup>a</sup> | 1875.4 | 1875.4  | 1878.3 | 1878.7 | 1878.7  | 1879.8 |
| gdb 5438 | 1880.1 <sup>a</sup> | 1873.7 | 1873.6  | 1876.0 | 1877.7 | 1877.7  | 1878.6 |
| gdb 5439 | 1870.7 <sup>a</sup> | 1867.8 | 1867.8  | 1869.4 | 1867.1 | 1867.1  | 1869.1 |
| gdb 5440 | 1880.7 <sup>a</sup> | 1876.4 | 1876.4  | 1879.2 | 1879.8 | 1879.8  | 1880.6 |
| gdb 5441 | 1879.9 <sup>a</sup> | 1876.5 | 1876.5  | 1878.4 | 1879.3 | 1879.2  | 1879.5 |
| gdb 5442 | 1870.1 <sup>a</sup> | 1865.9 | 1865.9  | 1867.7 | 1866.2 | 1866.2  | 1868.4 |
| gdb 5443 | 1846.9 <sup>a</sup> | 1840.0 | 1840.0  | 1841.6 | 1835.2 | 1835.2  | 1837.1 |
| gdb 5444 | 1857.2 <sup>a</sup> | 1850.1 | 1850.1  | 1852.7 | 1848.3 | 1848.3  | 1848.8 |
| gdb 5445 | 1833.5 <sup>a</sup> | 1825.6 | 1825.6  | 1828.2 | 1821.7 | 1821.7  | 1825.3 |
| gdb 5446 | 1844.6 <sup>a</sup> | 1836.1 | 1836.1  | 1839.8 | 1835.2 | 1835.1  | 1837.5 |
| gdb 5447 | 1833.6 <sup>a</sup> | 1808.9 | 1808.9  | 1815.2 | 1809.5 | 1809.4  | 1814.1 |
| gdb 5448 | 1839.8 <sup>a</sup> | 1815.9 | 1815.9  | 1823.3 | 1820.4 | 1820.4  | 1823.5 |
| gdb 5449 | 1847.3 <sup>a</sup> | 1829.9 | 1829.9  | 1833.1 | 1831.0 | 1830.9  | 1832.5 |
| gdb 5450 | 1845.1 <sup>a</sup> | 1829.7 | 1829.7  | 1833.1 | 1829.7 | 1829.6  | 1832.8 |
| gdb 5451 | 1837.6 <sup>a</sup> | 1820.7 | 1820.7  | 1823.0 | 1818.0 | 1817.9  | 1820.9 |
| gdb 5452 | 1854.4 <sup>a</sup> | 1837.8 | 1837.8  | 1841.0 | 1841.0 | 1841.0  | 1842.4 |
| gdb 5453 | 1848.7 <sup>a</sup> | 1836.4 | 1836.4  | 1840.3 | 1834.9 | 1834.8  | 1837.8 |
| gdb 5454 | 1854.2 <sup>a</sup> | 1842.4 | 1842.4  | 1847.7 | 1845.1 | 1845.1  | 1847.1 |
| gdb 5455 | 1848.9 <sup>a</sup> | 1832.7 | 1832.7  | 1835.8 | 1833.1 | 1833.1  | 1834.5 |
| gdb 5456 | 1850.6 <sup>a</sup> | 1837.9 | 1837.9  | 1841.0 | 1836.2 | 1836.2  | 1838.6 |
| gdb 5457 | 1839.2 <sup>a</sup> | 1824.5 | 1824.5  | 1826.6 | 1820.9 | 1820.9  | 1823.6 |

... continued on next page ...



Table S73: ... continued from previous page ...

| Species  | Ref.                | OM2    | OM2-D3T | ODM2   | OM3    | OM3-D3T | ODM3   |
|----------|---------------------|--------|---------|--------|--------|---------|--------|
| gdb 5458 | 1856.3 <sup>a</sup> | 1843.1 | 1843.1  | 1847.7 | 1845.6 | 1845.6  | 1847.2 |
| gdb 5459 | 1844.3 <sup>a</sup> | 1828.2 | 1828.2  | 1831.3 | 1828.8 | 1828.8  | 1830.7 |
| gdb 5460 | 1843.0 <sup>a</sup> | 1827.1 | 1827.1  | 1830.1 | 1828.0 | 1828.0  | 1829.3 |
| gdb 5461 | 1843.8 <sup>a</sup> | 1829.6 | 1829.5  | 1832.8 | 1829.7 | 1829.7  | 1832.7 |
| gdb 5462 | 1835.2 <sup>a</sup> | 1819.4 | 1819.4  | 1821.4 | 1816.3 | 1816.3  | 1819.1 |
| gdb 5463 | 1852.2 <sup>a</sup> | 1836.6 | 1836.6  | 1841.0 | 1840.6 | 1840.6  | 1842.5 |
| gdb 5464 | 1883.5 <sup>a</sup> | 1876.2 | 1876.2  | 1878.4 | 1869.9 | 1869.9  | 1872.7 |
| gdb 5465 | 1878.5 <sup>a</sup> | 1869.5 | 1869.5  | 1871.6 | 1864.8 | 1864.8  | 1868.3 |
| gdb 5466 | 1888.0 <sup>a</sup> | 1879.2 | 1879.2  | 1882.7 | 1878.3 | 1878.3  | 1880.6 |
| gdb 5467 | 1833.5 <sup>a</sup> | 1808.9 | 1808.9  | 1813.1 | 1810.2 | 1810.2  | 1811.7 |
| gdb 5468 | 1838.2 <sup>a</sup> | 1811.6 | 1811.6  | 1817.0 | 1812.0 | 1811.9  | 1816.1 |
| gdb 5469 | 1826.7 <sup>a</sup> | 1801.5 | 1801.5  | 1804.8 | 1799.1 | 1799.1  | 1802.2 |
| gdb 5470 | 1842.5 <sup>a</sup> | 1817.2 | 1817.1  | 1823.7 | 1821.2 | 1821.2  | 1824.0 |
| gdb 5471 | 1831.2 <sup>a</sup> | 1807.8 | 1807.8  | 1811.7 | 1808.7 | 1808.7  | 1810.1 |
| gdb 5472 | 1832.5 <sup>a</sup> | 1807.8 | 1807.8  | 1811.8 | 1807.9 | 1807.8  | 1809.0 |
| gdb 5473 | 1835.6 <sup>a</sup> | 1809.7 | 1809.7  | 1815.1 | 1809.9 | 1809.8  | 1813.9 |
| gdb 5474 | 1824.1 <sup>a</sup> | 1800.2 | 1800.2  | 1803.0 | 1797.3 | 1797.2  | 1800.1 |
| gdb 5475 | 1843.9 <sup>a</sup> | 1817.8 | 1817.8  | 1824.2 | 1822.0 | 1822.0  | 1824.6 |
| gdb 5476 | 1838.9 <sup>a</sup> | 1830.0 | 1829.9  | 1829.5 | 1827.4 | 1827.4  | 1824.7 |
| gdb 5477 | 1826.8 <sup>a</sup> | 1818.5 | 1818.5  | 1820.5 | 1819.7 | 1819.7  | 1821.3 |
| gdb 5478 | 1827.9 <sup>a</sup> | 1819.5 | 1819.5  | 1818.1 | 1813.9 | 1813.9  | 1812.5 |
| gdb 5479 | 1836.9 <sup>a</sup> | 1827.7 | 1827.7  | 1829.5 | 1831.5 | 1831.5  | 1831.4 |
| gdb 5480 | 1834.2 <sup>a</sup> | 1825.8 | 1825.8  | 1823.9 | 1822.3 | 1822.3  | 1819.3 |
| gdb 5481 | 1834.3 <sup>a</sup> | 1826.5 | 1826.5  | 1826.1 | 1824.5 | 1824.5  | 1821.7 |
| gdb 5482 | 1825.8 <sup>a</sup> | 1816.7 | 1818.6  | 1820.8 | 1817.4 | 1817.4  | 1820.6 |
| gdb 5483 | 1824.8 <sup>a</sup> | 1817.3 | 1817.3  | 1815.9 | 1811.4 | 1811.3  | 1810.1 |
| gdb 5484 | 1838.3 <sup>a</sup> | 1829.8 | 1829.8  | 1831.6 | 1833.4 | 1833.4  | 1833.0 |
| gdb 5485 | 1861.1 <sup>a</sup> | 1857.3 | 1857.3  | 1859.8 | 1851.8 | 1851.8  | 1855.5 |
| gdb 5486 | 1859.8 <sup>a</sup> | 1853.1 | 1853.0  | 1856.1 | 1848.5 | 1848.4  | 1852.7 |
| gdb 5487 | 1868.5 <sup>a</sup> | 1865.0 | 1865.0  | 1868.4 | 1863.4 | 1863.4  | 1865.5 |
| gdb 5488 | 1866.9 <sup>a</sup> | 1860.5 | 1860.5  | 1863.1 | 1859.5 | 1859.5  | 1861.8 |
| gdb 5489 | 1853.0 <sup>a</sup> | 1835.3 | 1835.3  | 1840.1 | 1831.7 | 1831.7  | 1837.0 |
| gdb 5490 | 1858.7 <sup>a</sup> | 1841.6 | 1841.6  | 1847.2 | 1841.9 | 1841.9  | 1845.6 |
| gdb 5491 | 1875.1 <sup>a</sup> | 1873.7 | 1873.7  | 1876.3 | 1872.1 | 1872.1  | 1874.7 |
| gdb 5492 | 1882.4 <sup>a</sup> | 1882.4 | 1882.4  | 1885.9 | 1883.4 | 1883.4  | 1884.5 |
| gdb 5493 | 1863.1 <sup>a</sup> | 1860.1 | 1860.1  | 1865.0 | 1856.4 | 1856.4  | 1860.4 |
| gdb 5494 | 1864.3 <sup>a</sup> | 1861.8 | 1861.8  | 1866.6 | 1862.5 | 1862.5  | 1865.3 |
| gdb 5495 | 1873.0 <sup>a</sup> | 1869.1 | 1869.1  | 1871.3 | 1868.9 | 1868.8  | 1871.7 |
| gdb 5496 | 1884.8 <sup>a</sup> | 1881.3 | 1881.3  | 1884.4 | 1883.9 | 1883.9  | 1885.2 |
| gdb 5497 | 1881.5 <sup>a</sup> | 1875.1 | 1875.1  | 1877.6 | 1878.7 | 1878.7  | 1879.7 |
| gdb 5498 | 1882.4 <sup>a</sup> | 1874.0 | 1874.0  | 1876.5 | 1878.2 | 1878.2  | 1878.8 |
| gdb 5499 | 1889.1 <sup>a</sup> | 1866.7 | 1866.7  | 1867.9 | 1867.4 | 1867.4  | 1869.3 |
| gdb 5500 | 1872.0 <sup>a</sup> | 1865.4 | 1865.4  | 1867.0 | 1865.9 | 1865.9  | 1868.2 |
| gdb 5501 | 1907.9 <sup>a</sup> | 1904.3 | 1904.3  | 1905.2 | 1903.7 | 1903.7  | 1905.8 |
| gdb 5502 | 1888.7 <sup>a</sup> | 1894.9 | 1894.9  | 1895.3 | 1895.5 | 1895.4  | 1897.2 |
| gdb 5503 | 1899.1 <sup>a</sup> | 1904.1 | 1904.0  | 1904.2 | 1907.0 | 1907.0  | 1906.8 |
| gdb 5504 | 1885.0 <sup>a</sup> | 1883.1 | 1883.1  | 1884.4 | 1880.8 | 1880.8  | 1881.4 |
| gdb 5505 | 1882.1 <sup>a</sup> | 1880.0 | 1880.0  | 1882.3 | 1877.9 | 1877.9  | 1881.3 |
| gdb 5506 | 1894.5 <sup>a</sup> | 1890.7 | 1890.7  | 1894.3 | 1892.3 | 1892.3  | 1894.6 |
| gdb 5507 | 1862.2 <sup>a</sup> | 1854.5 | 1854.4  | 1856.7 | 1855.5 | 1855.5  | 1857.5 |
| gdb 5508 | 1859.9 <sup>a</sup> | 1858.3 | 1858.3  | 1860.0 | 1858.5 | 1858.5  | 1861.5 |
| gdb 5509 | 1870.6 <sup>a</sup> | 1868.1 | 1868.1  | 1869.4 | 1870.8 | 1870.8  | 1871.8 |
| gdb 5510 | 1870.6 <sup>a</sup> | 1852.0 | 1852.0  | 1855.8 | 1856.6 | 1856.6  | 1858.4 |
| gdb 5511 | 1873.0 <sup>a</sup> | 1852.5 | 1852.5  | 1856.3 | 1856.7 | 1856.7  | 1858.2 |
| gdb 5512 | 1858.9 <sup>a</sup> | 1847.0 | 1847.0  | 1847.2 | 1846.4 | 1846.3  | 1844.5 |
| gdb 5513 | 1863.5 <sup>a</sup> | 1844.4 | 1844.4  | 1847.4 | 1845.3 | 1845.3  | 1848.8 |
| gdb 5514 | 1862.2 <sup>a</sup> | 1860.8 | 1860.8  | 1862.9 | 1857.4 | 1857.4  | 1858.5 |
| gdb 5515 | 1864.3 <sup>a</sup> | 1859.1 | 1859.1  | 1862.9 | 1856.0 | 1856.0  | 1859.5 |
| gdb 5516 | 1854.2 <sup>a</sup> | 1852.7 | 1852.6  | 1853.5 | 1844.8 | 1844.7  | 1847.0 |
| gdb 5517 | 1869.6 <sup>a</sup> | 1865.2 | 1865.2  | 1869.9 | 1866.2 | 1866.1  | 1868.5 |
| gdb 5518 | 1850.4 <sup>a</sup> | 1840.4 | 1840.4  | 1841.0 | 1839.2 | 1839.1  | 1838.5 |
| gdb 5519 | 1854.3 <sup>a</sup> | 1840.6 | 1840.6  | 1843.7 | 1839.7 | 1839.7  | 1843.3 |
| gdb 5520 | 1862.2 <sup>a</sup> | 1847.4 | 1847.4  | 1851.0 | 1850.4 | 1850.4  | 1852.4 |
| gdb 5521 | 1885.3 <sup>a</sup> | 1883.8 | 1883.8  | 1885.0 | 1881.8 | 1881.8  | 1882.6 |
| gdb 5522 | 1900.2 <sup>a</sup> | 1890.2 | 1890.2  | 1892.5 | 1888.5 | 1888.5  | 1891.6 |

... continued on next page ...

Table S73: ... continued from previous page ...

| Species  | Ref.                | OM2    | OM2-D3T | ODM2   | OM3    | OM3-D3T | ODM3   |
|----------|---------------------|--------|---------|--------|--------|---------|--------|
| gdb 5523 | 1884.7 <sup>a</sup> | 1882.9 | 1882.8  | 1885.4 | 1881.1 | 1881.1  | 1885.0 |
| gdb 5524 | 1891.9 <sup>a</sup> | 1888.8 | 1888.8  | 1892.4 | 1891.2 | 1891.2  | 1893.8 |
| gdb 5525 | 1859.5 <sup>a</sup> | 1859.6 | 1859.6  | 1861.4 | 1856.7 | 1856.7  | 1857.6 |
| gdb 5526 | 1851.4 <sup>a</sup> | 1851.3 | 1851.3  | 1851.8 | 1844.0 | 1844.0  | 1846.0 |
| gdb 5527 | 1848.9 <sup>a</sup> | 1840.7 | 1840.7  | 1839.1 | 1832.5 | 1832.4  | 1830.1 |
| gdb 5528 | 1845.9 <sup>a</sup> | 1835.6 | 1835.5  | 1835.7 | 1827.7 | 1827.6  | 1829.1 |
| gdb 5529 | 1841.9 <sup>a</sup> | 1838.3 | 1838.3  | 1838.9 | 1831.6 | 1831.6  | 1833.1 |
| gdb 5530 | 1856.7 <sup>a</sup> | 1846.1 | 1846.1  | 1846.9 | 1842.7 | 1842.7  | 1841.8 |
| gdb 5531 | 1853.3 <sup>a</sup> | 1848.0 | 1848.0  | 1849.8 | 1845.8 | 1845.7  | 1846.0 |
| gdb 5532 | 1822.5 <sup>a</sup> | 1806.9 | 1806.9  | 1804.7 | 1800.3 | 1800.3  | 1796.0 |
| gdb 5533 | 1828.5 <sup>a</sup> | 1807.2 | 1807.1  | 1807.9 | 1802.1 | 1802.1  | 1802.5 |
| gdb 5534 | 1817.0 <sup>a</sup> | 1806.1 | 1806.1  | 1806.9 | 1801.4 | 1801.4  | 1801.6 |
| gdb 5535 | 1834.9 <sup>a</sup> | 1813.3 | 1813.2  | 1814.8 | 1812.4 | 1812.4  | 1811.3 |
| gdb 5536 | 1822.8 <sup>a</sup> | 1813.4 | 1813.3  | 1814.9 | 1812.9 | 1812.8  | 1811.7 |
| gdb 5537 | 1846.6 <sup>a</sup> | 1838.4 | 1838.4  | 1839.3 | 1837.9 | 1837.9  | 1838.0 |
| gdb 5538 | 1851.6 <sup>a</sup> | 1837.7 | 1837.7  | 1841.4 | 1838.3 | 1838.2  | 1843.0 |
| gdb 5539 | 1853.7 <sup>a</sup> | 1842.3 | 1842.3  | 1846.9 | 1846.8 | 1846.7  | 1849.7 |
| gdb 5540 | 1868.7 <sup>a</sup> | 1867.8 | 1867.8  | 1869.6 | 1860.6 | 1860.6  | 1864.1 |
| gdb 5541 | 1878.3 <sup>a</sup> | 1876.1 | 1876.1  | 1879.1 | 1873.1 | 1873.1  | 1875.5 |
| gdb 5542 | 1882.6 <sup>a</sup> | 1877.1 | 1877.1  | 1878.0 | 1879.6 | 1879.6  | 1879.6 |
| gdb 5543 | 1882.3 <sup>a</sup> | 1875.6 | 1875.6  | 1877.9 | 1879.4 | 1879.4  | 1879.6 |
| gdb 5544 | 1876.5 <sup>a</sup> | 1872.2 | 1872.1  | 1870.6 | 1869.4 | 1869.4  | 1866.5 |
| gdb 5545 | 1872.7 <sup>a</sup> | 1869.4 | 1869.3  | 1870.3 | 1868.4 | 1868.3  | 1869.9 |
| gdb 5546 | 1844.9 <sup>a</sup> | 1836.3 | 1836.3  | 1832.5 | 1827.1 | 1827.1  | 1821.4 |
| gdb 5547 | 1839.7 <sup>a</sup> | 1834.3 | 1834.3  | 1833.1 | 1826.9 | 1826.8  | 1825.3 |
| gdb 5548 | 1837.9 <sup>a</sup> | 1833.7 | 1833.7  | 1832.2 | 1826.3 | 1826.3  | 1824.6 |
| gdb 5549 | 1852.6 <sup>a</sup> | 1844.2 | 1844.2  | 1844.1 | 1840.6 | 1840.6  | 1837.7 |
| gdb 5550 | 1846.4 <sup>a</sup> | 1841.0 | 1840.9  | 1840.7 | 1837.4 | 1837.4  | 1834.8 |
| gdb 5551 | 1867.2 <sup>a</sup> | 1864.9 | 1864.9  | 1863.8 | 1861.9 | 1861.9  | 1860.3 |
| gdb 5552 | 1861.9 <sup>a</sup> | 1864.0 | 1864.0  | 1865.8 | 1862.4 | 1862.4  | 1865.4 |
| gdb 5553 | 1868.9 <sup>a</sup> | 1869.8 | 1869.8  | 1871.2 | 1871.7 | 1871.7  | 1872.7 |
| gdb 5554 | 1864.6 <sup>a</sup> | 1861.0 | 1861.0  | 1856.4 | 1851.6 | 1851.5  | 1846.3 |
| gdb 5555 | 1860.8 <sup>a</sup> | 1861.6 | 1861.6  | 1859.6 | 1853.7 | 1853.7  | 1852.0 |
| gdb 5556 | 1869.7 <sup>a</sup> | 1868.9 | 1868.9  | 1868.3 | 1864.9 | 1864.9  | 1862.4 |
| gdb 5557 | 1881.4 <sup>a</sup> | 1879.1 | 1879.1  | 1878.4 | 1874.6 | 1874.6  | 1872.9 |
| gdb 5558 | 1870.0 <sup>a</sup> | 1868.1 | 1868.1  | 1866.0 | 1859.9 | 1859.9  | 1859.1 |
| gdb 5559 | 1907.3 <sup>a</sup> | 1905.5 | 1905.5  | 1906.4 | 1904.0 | 1904.0  | 1905.9 |
| gdb 5560 | 1897.6 <sup>a</sup> | 1901.3 | 1901.2  | 1899.2 | 1898.2 | 1898.2  | 1895.7 |
| gdb 5561 | 1885.6 <sup>a</sup> | 1894.9 | 1894.9  | 1896.2 | 1893.3 | 1893.3  | 1894.9 |
| gdb 5562 | 1898.7 <sup>a</sup> | 1906.1 | 1906.1  | 1907.8 | 1908.3 | 1908.3  | 1908.7 |
| gdb 5563 | 1840.4 <sup>a</sup> | 1831.1 | 1831.1  | 1830.0 | 1825.3 | 1825.2  | 1824.1 |
| gdb 5564 | 1831.6 <sup>a</sup> | 1816.9 | 1816.9  | 1819.2 | 1816.1 | 1816.1  | 1818.2 |
| gdb 5565 | 1851.3 <sup>a</sup> | 1841.6 | 1841.6  | 1841.5 | 1838.8 | 1838.8  | 1836.4 |
| gdb 5566 | 1842.1 <sup>a</sup> | 1826.7 | 1828.2  | 1828.6 | 1828.3 | 1828.3  | 1828.8 |
| gdb 5567 | 1844.5 <sup>a</sup> | 1828.4 | 1828.4  | 1831.6 | 1829.0 | 1829.0  | 1830.8 |
| gdb 5568 | 1844.4 <sup>a</sup> | 1826.1 | 1826.1  | 1829.3 | 1827.6 | 1827.6  | 1829.1 |
| gdb 5569 | 1843.8 <sup>a</sup> | 1830.7 | 1830.7  | 1834.1 | 1830.4 | 1830.4  | 1833.3 |
| gdb 5570 | 1838.4 <sup>a</sup> | 1819.2 | 1819.2  | 1823.4 | 1816.0 | 1815.9  | 1819.1 |
| gdb 5571 | 1855.4 <sup>a</sup> | 1839.7 | 1839.7  | 1844.2 | 1843.6 | 1843.6  | 1845.2 |
| gdb 5572 | 1856.8 <sup>a</sup> | 1845.0 | 1845.0  | 1848.2 | 1839.2 | 1839.2  | 1841.0 |
| gdb 5573 | 1851.5 <sup>a</sup> | 1839.2 | 1839.2  | 1842.3 | 1833.4 | 1833.4  | 1837.4 |
| gdb 5574 | 1862.4 <sup>a</sup> | 1850.1 | 1850.1  | 1854.4 | 1848.2 | 1848.1  | 1850.7 |
| gdb 5575 | 1847.4 <sup>a</sup> | 1841.0 | 1841.0  | 1845.1 | 1834.7 | 1834.7  | 1839.5 |
| gdb 5576 | 1854.8 <sup>a</sup> | 1849.4 | 1849.4  | 1853.2 | 1846.4 | 1846.4  | 1849.5 |
| gdb 5577 | 1855.3 <sup>a</sup> | 1842.6 | 1842.6  | 1845.6 | 1837.1 | 1837.1  | 1840.9 |
| gdb 5578 | 1850.9 <sup>a</sup> | 1843.4 | 1843.4  | 1847.4 | 1838.0 | 1838.0  | 1842.3 |
| gdb 5579 | 1862.1 <sup>a</sup> | 1849.3 | 1849.3  | 1852.2 | 1847.2 | 1847.2  | 1849.3 |
| gdb 5580 | 1859.8 <sup>a</sup> | 1851.8 | 1851.8  | 1856.9 | 1850.2 | 1850.2  | 1853.4 |
| gdb 5581 | 1863.5 <sup>a</sup> | 1857.5 | 1857.5  | 1855.6 | 1851.7 | 1851.7  | 1850.6 |
| gdb 5582 | 1850.1 <sup>a</sup> | 1850.4 | 1850.3  | 1852.1 | 1847.2 | 1847.2  | 1849.9 |
| gdb 5583 | 1874.4 <sup>a</sup> | 1868.0 | 1868.0  | 1867.1 | 1865.1 | 1865.1  | 1862.7 |
| gdb 5584 | 1860.3 <sup>a</sup> | 1859.3 | 1859.3  | 1860.8 | 1859.1 | 1859.0  | 1860.1 |
| gdb 5585 | 1873.0 <sup>a</sup> | 1869.7 | 1869.7  | 1871.9 | 1869.1 | 1869.1  | 1871.7 |
| gdb 5586 | 1885.6 <sup>a</sup> | 1881.7 | 1881.7  | 1884.6 | 1884.4 | 1884.4  | 1885.5 |
| gdb 5587 | 1910.1 <sup>a</sup> | 1905.7 | 1905.7  | 1906.6 | 1904.7 | 1904.7  | 1906.6 |

... continued on next page ...

Table S73: ... continued from previous page ...

| Species  | Ref.                | OM2    | OM2-D3T | ODM2   | OM3    | OM3-D3T | ODM3   |
|----------|---------------------|--------|---------|--------|--------|---------|--------|
| gdb 5588 | 1889.2 <sup>a</sup> | 1893.9 | 1893.8  | 1895.8 | 1894.5 | 1894.4  | 1896.2 |
| gdb 5589 | 1889.8 <sup>a</sup> | 1894.0 | 1894.0  | 1894.5 | 1894.3 | 1894.3  | 1895.7 |
| gdb 5590 | 1899.5 <sup>a</sup> | 1903.6 | 1903.6  | 1905.0 | 1906.9 | 1906.8  | 1906.8 |
| gdb 5591 | 1865.0 <sup>a</sup> | 1856.4 | 1856.3  | 1858.5 | 1857.1 | 1857.1  | 1859.0 |
| gdb 5592 | 1866.2 <sup>a</sup> | 1854.0 | 1853.9  | 1855.3 | 1854.7 | 1854.6  | 1856.5 |
| gdb 5593 | 1864.6 <sup>a</sup> | 1861.1 | 1861.1  | 1862.4 | 1860.6 | 1860.6  | 1863.0 |
| gdb 5594 | 1874.1 <sup>a</sup> | 1871.1 | 1871.1  | 1873.3 | 1873.5 | 1873.5  | 1874.5 |
| gdb 5595 | 1879.3 <sup>a</sup> | 1876.3 | 1876.3  | 1879.0 | 1875.5 | 1875.5  | 1877.9 |
| gdb 5596 | 1883.2 <sup>a</sup> | 1878.0 | 1877.9  | 1880.3 | 1876.6 | 1876.6  | 1880.3 |
| gdb 5597 | 1889.4 <sup>a</sup> | 1884.0 | 1884.0  | 1887.2 | 1886.8 | 1886.8  | 1888.8 |
| gdb 5598 | 1876.1 <sup>a</sup> | 1879.6 | 1879.6  | 1882.2 | 1872.6 | 1872.6  | 1877.2 |
| gdb 5599 | 1885.3 <sup>a</sup> | 1888.0 | 1888.0  | 1891.7 | 1884.9 | 1884.9  | 1888.4 |
| gdb 5600 | 1871.7 <sup>a</sup> | 1871.6 | 1871.6  | 1874.2 | 1870.6 | 1870.6  | 1873.0 |
| gdb 5601 | 1874.7 <sup>a</sup> | 1874.1 | 1874.1  | 1876.9 | 1873.3 | 1873.3  | 1876.0 |
| gdb 5602 | 1866.3 <sup>a</sup> | 1875.2 | 1875.2  | 1877.4 | 1873.0 | 1873.0  | 1875.8 |
| gdb 5603 | 1880.0 <sup>a</sup> | 1885.1 | 1885.1  | 1888.6 | 1886.8 | 1886.8  | 1888.6 |
| gdb 5604 | 1863.5 <sup>a</sup> | 1862.9 | 1862.9  | 1864.5 | 1859.3 | 1859.3  | 1863.2 |
| gdb 5605 | 1873.3 <sup>a</sup> | 1873.1 | 1873.1  | 1875.7 | 1872.7 | 1872.7  | 1875.4 |
| gdb 5606 | 1881.3 <sup>a</sup> | 1879.2 | 1879.2  | 1878.5 | 1874.9 | 1874.9  | 1872.9 |
| gdb 5607 | 1871.3 <sup>a</sup> | 1869.8 | 1869.8  | 1867.7 | 1861.8 | 1861.8  | 1860.8 |
| gdb 5608 | 1910.8 <sup>a</sup> | 1917.7 | 1917.7  | 1919.5 | 1919.4 | 1919.4  | 1920.3 |
| gdb 5609 | 1896.8 <sup>a</sup> | 1904.7 | 1904.7  | 1906.1 | 1902.9 | 1902.9  | 1905.4 |
| gdb 5610 | 1909.8 <sup>a</sup> | 1912.9 | 1912.9  | 1915.3 | 1914.1 | 1914.1  | 1915.6 |
| gdb 5611 | 1910.3 <sup>a</sup> | 1913.5 | 1913.5  | 1914.8 | 1914.5 | 1914.5  | 1915.1 |
| gdb 5612 | 1900.7 <sup>a</sup> | 1905.2 | 1905.2  | 1906.2 | 1902.8 | 1902.7  | 1905.4 |
| gdb 5613 | 1908.0 <sup>a</sup> | 1915.0 | 1914.9  | 1917.1 | 1915.7 | 1915.7  | 1917.0 |
| gdb 5614 | 1905.8 <sup>a</sup> | 1911.8 | 1911.7  | 1912.8 | 1912.8 | 1912.8  | 1913.3 |
| gdb 5615 | 1894.0 <sup>a</sup> | 1901.7 | 1901.7  | 1903.7 | 1899.1 | 1899.0  | 1901.9 |
| gdb 5616 | 1882.9 <sup>a</sup> | 1878.4 | 1878.4  | 1876.6 | 1873.3 | 1873.3  | 1871.2 |
| gdb 5617 | 1870.6 <sup>a</sup> | 1867.0 | 1867.0  | 1865.2 | 1858.8 | 1858.8  | 1858.3 |
| gdb 5618 | 1874.1 <sup>a</sup> | 1872.6 | 1872.6  | 1874.4 | 1871.0 | 1870.9  | 1873.3 |
| gdb 5619 | 1882.8 <sup>a</sup> | 1879.2 | 1879.2  | 1882.3 | 1881.5 | 1881.4  | 1882.8 |
| gdb 5620 | 1873.2 <sup>a</sup> | 1872.4 | 1872.4  | 1873.9 | 1870.7 | 1870.6  | 1873.0 |
| gdb 5621 | 1882.7 <sup>a</sup> | 1879.9 | 1879.9  | 1882.9 | 1882.1 | 1882.1  | 1883.5 |
| gdb 5622 | 1882.3 <sup>a</sup> | 1878.3 | 1878.3  | 1878.1 | 1873.7 | 1873.6  | 1872.4 |
| gdb 5623 | 1874.2 <sup>a</sup> | 1873.6 | 1873.6  | 1875.5 | 1871.8 | 1871.8  | 1874.2 |
| gdb 5624 | 1869.7 <sup>a</sup> | 1867.0 | 1866.9  | 1865.3 | 1858.5 | 1858.4  | 1858.2 |
| gdb 5625 | 1884.7 <sup>a</sup> | 1882.4 | 1882.4  | 1885.5 | 1884.4 | 1884.4  | 1885.7 |
| gdb 5626 | 1867.7 <sup>a</sup> | 1867.1 | 1867.1  | 1868.8 | 1859.8 | 1859.8  | 1863.2 |
| gdb 5627 | 1878.1 <sup>a</sup> | 1876.0 | 1876.0  | 1879.1 | 1872.4 | 1872.4  | 1874.8 |
| gdb 5628 | 1872.0 <sup>a</sup> | 1870.4 | 1870.4  | 1872.6 | 1864.6 | 1864.6  | 1868.8 |
| gdb 5629 | 1871.0 <sup>a</sup> | 1869.3 | 1869.3  | 1871.4 | 1863.6 | 1863.6  | 1868.0 |
| gdb 5630 | 1880.8 <sup>a</sup> | 1877.9 | 1877.9  | 1880.0 | 1875.1 | 1875.1  | 1877.7 |
| gdb 5631 | 1879.7 <sup>a</sup> | 1876.9 | 1876.9  | 1880.4 | 1874.8 | 1874.7  | 1878.0 |
| gdb 5632 | 1868.7 <sup>a</sup> | 1869.7 | 1869.6  | 1867.9 | 1861.4 | 1861.4  | 1860.8 |
| gdb 5633 | 1881.6 <sup>a</sup> | 1881.8 | 1881.8  | 1881.6 | 1877.1 | 1877.1  | 1875.3 |
| gdb 5634 | 1890.3 <sup>a</sup> | 1897.2 | 1897.2  | 1898.5 | 1895.5 | 1895.4  | 1899.0 |
| gdb 5635 | 1900.1 <sup>a</sup> | 1904.8 | 1904.7  | 1905.7 | 1906.4 | 1906.4  | 1907.8 |
| gdb 5636 | 1873.4 <sup>a</sup> | 1869.8 | 1869.5  | 1868.7 | 1862.8 | 1862.6  | 1861.9 |
| gdb 5637 | 1885.1 <sup>a</sup> | 1878.4 | 1878.3  | 1877.9 | 1875.3 | 1875.2  | 1873.4 |
| gdb 5638 | 1912.1 <sup>a</sup> | 1912.8 | 1912.8  | 1913.7 | 1909.5 | 1909.5  | 1912.5 |
| gdb 5639 | 1896.4 <sup>a</sup> | 1903.5 | 1903.5  | 1903.8 | 1901.3 | 1901.2  | 1903.3 |
| gdb 5640 | 1906.3 <sup>a</sup> | 1912.6 | 1912.6  | 1912.9 | 1913.9 | 1913.9  | 1914.3 |
| gdb 5641 | 1913.5 <sup>a</sup> | 1924.2 | 1924.2  | 1923.8 | 1927.7 | 1927.7  | 1927.5 |
| gdb 5642 | 1913.0 <sup>a</sup> | 1915.4 | 1915.4  | 1917.1 | 1917.4 | 1917.4  | 1918.2 |
| gdb 5643 | 1925.7 <sup>a</sup> | 1919.5 | 1919.5  | 1920.4 | 1917.3 | 1917.3  | 1919.4 |
| gdb 5644 | 1904.0 <sup>a</sup> | 1907.6 | 1907.6  | 1907.9 | 1906.0 | 1906.0  | 1907.9 |
| gdb 5645 | 1875.4 <sup>a</sup> | 1877.6 | 1877.6  | 1876.0 | 1874.2 | 1874.1  | 1871.2 |
| gdb 5646 | 1897.8 <sup>a</sup> | 1884.7 | 1884.6  | 1885.3 | 1883.4 | 1883.4  | 1884.2 |
| gdb 5647 | 1872.3 <sup>a</sup> | 1877.9 | 1877.9  | 1879.4 | 1876.6 | 1876.6  | 1878.3 |
| gdb 5648 | 1881.6 <sup>a</sup> | 1884.9 | 1884.9  | 1886.1 | 1886.9 | 1886.8  | 1886.6 |
| gdb 5649 | 1898.4 <sup>a</sup> | 1904.9 | 1904.9  | 1906.5 | 1908.1 | 1908.1  | 1909.9 |
| gdb 5650 | 1895.0 <sup>a</sup> | 1896.9 | 1896.9  | 1894.6 | 1893.5 | 1893.5  | 1890.4 |
| gdb 5651 | 1912.1 <sup>a</sup> | 1909.3 | 1909.3  | 1909.9 | 1907.2 | 1907.2  | 1908.7 |
| gdb 5652 | 1891.9 <sup>a</sup> | 1898.3 | 1898.3  | 1898.6 | 1897.0 | 1897.0  | 1898.3 |

... continued on next page ...

Table S73: ... continued from previous page ...

| Species  | Ref.                | OM2    | OM2-D3T | ODM2   | OM3    | OM3-D3T | ODM3   |
|----------|---------------------|--------|---------|--------|--------|---------|--------|
| gdb 5653 | 1900.6 <sup>a</sup> | 1905.0 | 1904.9  | 1905.3 | 1907.0 | 1907.0  | 1906.5 |
| gdb 5654 | 1912.8 <sup>a</sup> | 1916.2 | 1916.2  | 1918.0 | 1918.1 | 1918.1  | 1919.0 |
| gdb 5655 | 1925.8 <sup>a</sup> | 1920.3 | 1920.3  | 1921.3 | 1918.1 | 1918.1  | 1920.4 |
| gdb 5656 | 1904.7 <sup>a</sup> | 1909.0 | 1909.0  | 1909.4 | 1907.3 | 1907.3  | 1909.3 |
| gdb 5657 | 1920.6 <sup>a</sup> | 1934.9 | 1934.9  | 1935.0 | 1938.6 | 1938.6  | 1938.9 |
| gdb 5658 | 1915.5 <sup>a</sup> | 1915.4 | 1915.4  | 1916.4 | 1912.6 | 1912.6  | 1915.6 |
| gdb 5659 | 1898.2 <sup>a</sup> | 1904.0 | 1904.0  | 1904.2 | 1902.4 | 1902.4  | 1904.7 |
| gdb 5660 | 1908.4 <sup>a</sup> | 1911.4 | 1911.4  | 1913.2 | 1913.4 | 1913.4  | 1914.6 |
| gdb 5661 | 1854.0 <sup>a</sup> | 1851.7 | 1851.7  | 1855.6 | 1849.1 | 1849.1  | 1851.6 |
| gdb 5662 | 1851.7 <sup>a</sup> | 1849.1 | 1849.0  | 1852.5 | 1845.9 | 1845.8  | 1848.3 |
| gdb 5663 | 1850.9 <sup>a</sup> | 1853.9 | 1853.9  | 1858.2 | 1849.9 | 1849.9  | 1853.4 |
| gdb 5664 | 1857.7 <sup>a</sup> | 1860.5 | 1860.5  | 1864.4 | 1860.1 | 1860.1  | 1861.6 |
| gdb 5665 | 1857.3 <sup>a</sup> | 1855.2 | 1855.2  | 1859.0 | 1851.9 | 1851.8  | 1854.1 |
| gdb 5666 | 1850.9 <sup>a</sup> | 1857.7 | 1857.7  | 1860.6 | 1852.5 | 1852.5  | 1855.3 |
| gdb 5667 | 1858.7 <sup>a</sup> | 1864.6 | 1864.6  | 1868.8 | 1863.3 | 1863.2  | 1864.6 |
| gdb 5668 | 1914.0 <sup>a</sup> | 1917.2 | 1917.2  | 1919.0 | 1919.0 | 1919.0  | 1919.7 |
| gdb 5669 | 1902.3 <sup>a</sup> | 1908.5 | 1908.5  | 1909.0 | 1906.5 | 1906.5  | 1908.0 |
| gdb 5670 | 1857.2 <sup>a</sup> | 1853.0 | 1853.0  | 1856.9 | 1850.7 | 1850.6  | 1853.3 |
| gdb 5671 | 1851.1 <sup>a</sup> | 1855.6 | 1855.6  | 1859.9 | 1851.9 | 1851.9  | 1855.3 |
| gdb 5672 | 1858.6 <sup>a</sup> | 1860.3 | 1860.3  | 1864.6 | 1860.0 | 1859.9  | 1861.8 |
| gdb 5673 | 1855.9 <sup>a</sup> | 1853.6 | 1853.5  | 1856.9 | 1852.2 | 1852.2  | 1853.8 |
| gdb 5674 | 1895.1 <sup>a</sup> | 1903.2 | 1903.2  | 1905.0 | 1901.4 | 1901.4  | 1903.9 |
| gdb 5675 | 1890.8 <sup>a</sup> | 1896.7 | 1896.4  | 1897.1 | 1895.0 | 1894.9  | 1898.0 |
| gdb 5676 | 1899.1 <sup>a</sup> | 1904.2 | 1904.1  | 1904.9 | 1905.7 | 1905.7  | 1907.0 |
| gdb 5677 | 1854.2 <sup>a</sup> | 1848.7 | 1848.6  | 1852.7 | 1847.5 | 1847.5  | 1850.2 |
| gdb 5678 | 1857.8 <sup>a</sup> | 1852.8 | 1852.8  | 1852.7 | 1848.7 | 1848.6  | 1846.1 |
| gdb 5679 | 1857.7 <sup>a</sup> | 1855.8 | 1855.8  | 1858.6 | 1858.5 | 1858.5  | 1858.1 |
| gdb 5680 | 1847.3 <sup>a</sup> | 1844.6 | 1844.6  | 1846.9 | 1844.4 | 1844.4  | 1845.9 |
| gdb 5681 | 1855.3 <sup>a</sup> | 1850.0 | 1849.9  | 1850.1 | 1845.9 | 1845.9  | 1844.1 |
| gdb 5682 | 1846.6 <sup>a</sup> | 1842.2 | 1842.2  | 1845.0 | 1842.0 | 1841.9  | 1844.6 |
| gdb 5683 | 1857.8 <sup>a</sup> | 1854.2 | 1854.2  | 1857.3 | 1856.8 | 1856.7  | 1857.4 |
| gdb 5684 | 1894.0 <sup>a</sup> | 1899.8 | 1899.8  | 1899.9 | 1901.6 | 1901.6  | 1901.8 |
| gdb 5685 | 1853.3 <sup>a</sup> | 1847.8 | 1847.8  | 1848.0 | 1842.4 | 1842.4  | 1840.6 |
| gdb 5686 | 1853.2 <sup>a</sup> | 1847.8 | 1847.7  | 1847.8 | 1842.6 | 1842.6  | 1840.6 |
| gdb 5687 | 1843.7 <sup>a</sup> | 1840.6 | 1840.6  | 1843.9 | 1838.8 | 1838.7  | 1841.3 |
| gdb 5688 | 1845.1 <sup>a</sup> | 1842.1 | 1842.1  | 1844.5 | 1840.0 | 1840.0  | 1842.2 |
| gdb 5689 | 1831.7 <sup>a</sup> | 1829.5 | 1829.4  | 1831.5 | 1824.6 | 1824.5  | 1828.4 |
| gdb 5690 | 1856.9 <sup>a</sup> | 1852.3 | 1852.2  | 1855.7 | 1852.9 | 1852.8  | 1853.8 |
| gdb 5691 | 1827.8 <sup>a</sup> | 1810.5 | 1810.5  | 1809.0 | 1804.0 | 1804.0  | 1799.9 |
| gdb 5692 | 1815.2 <sup>a</sup> | 1803.0 | 1803.0  | 1803.9 | 1800.2 | 1800.2  | 1800.9 |
| gdb 5693 | 1827.8 <sup>a</sup> | 1814.8 | 1814.8  | 1816.5 | 1814.7 | 1814.6  | 1813.8 |
| gdb 5694 | 1839.2 <sup>a</sup> | 1816.1 | 1816.1  | 1818.5 | 1814.7 | 1814.7  | 1813.8 |
| gdb 5695 | 1893.6 <sup>a</sup> | 1875.3 | 1875.2  | 1876.9 | 1876.8 | 1876.8  | 1879.1 |
| gdb 5696 | 1878.9 <sup>a</sup> | 1878.3 | 1878.3  | 1877.5 | 1876.5 | 1876.5  | 1874.7 |
| gdb 5697 | 1868.1 <sup>a</sup> | 1870.9 | 1870.9  | 1872.5 | 1871.7 | 1871.7  | 1874.3 |
| gdb 5698 | 1878.0 <sup>a</sup> | 1881.2 | 1881.2  | 1883.9 | 1884.7 | 1884.7  | 1885.9 |
| gdb 5699 | 1847.5 <sup>a</sup> | 1835.6 | 1835.6  | 1831.9 | 1827.2 | 1827.2  | 1821.8 |
| gdb 5700 | 1836.6 <sup>a</sup> | 1829.5 | 1829.5  | 1828.3 | 1824.0 | 1823.9  | 1823.0 |
| gdb 5701 | 1829.9 <sup>a</sup> | 1814.9 | 1814.9  | 1817.0 | 1814.3 | 1814.2  | 1816.8 |
| gdb 5702 | 1846.7 <sup>a</sup> | 1840.1 | 1840.1  | 1840.0 | 1837.1 | 1837.1  | 1834.8 |
| gdb 5703 | 1844.5 <sup>a</sup> | 1829.5 | 1829.5  | 1832.8 | 1831.6 | 1831.5  | 1832.7 |
| gdb 5704 | 1852.8 <sup>a</sup> | 1842.8 | 1842.7  | 1842.9 | 1839.5 | 1839.4  | 1836.7 |
| gdb 5705 | 1880.6 <sup>a</sup> | 1880.0 | 1879.9  | 1879.7 | 1876.1 | 1876.1  | 1874.2 |
| gdb 5706 | 1894.5 <sup>a</sup> | 1879.5 | 1879.4  | 1880.1 | 1878.8 | 1878.8  | 1880.0 |
| gdb 5707 | 1873.1 <sup>a</sup> | 1867.7 | 1867.7  | 1869.8 | 1869.2 | 1869.2  | 1870.2 |
| gdb 5708 | 1878.3 <sup>a</sup> | 1879.0 | 1879.0  | 1878.0 | 1875.9 | 1875.8  | 1873.1 |
| gdb 5709 | 1870.7 <sup>a</sup> | 1873.0 | 1873.0  | 1874.5 | 1873.2 | 1873.2  | 1875.0 |
| gdb 5710 | 1881.5 <sup>a</sup> | 1883.8 | 1883.8  | 1886.4 | 1886.6 | 1886.6  | 1887.1 |
| gdb 5711 | 1862.4 <sup>a</sup> | 1861.5 | 1861.4  | 1863.7 | 1858.7 | 1858.7  | 1862.3 |
| gdb 5712 | 1875.8 <sup>a</sup> | 1874.7 | 1874.6  | 1877.7 | 1874.7 | 1874.7  | 1876.7 |
| gdb 5713 | 1881.6 <sup>a</sup> | 1878.4 | 1878.3  | 1877.9 | 1874.3 | 1874.3  | 1872.1 |
| gdb 5714 | 1893.3 <sup>a</sup> | 1898.5 | 1898.5  | 1898.3 | 1900.9 | 1900.8  | 1900.0 |
| gdb 5715 | 1850.7 <sup>a</sup> | 1848.4 | 1848.4  | 1848.4 | 1843.6 | 1843.6  | 1841.5 |
| gdb 5716 | 1850.4 <sup>a</sup> | 1849.9 | 1849.9  | 1850.1 | 1844.3 | 1844.3  | 1842.1 |
| gdb 5717 | 1841.5 <sup>a</sup> | 1844.1 | 1844.1  | 1846.9 | 1841.7 | 1841.7  | 1843.7 |

... continued on next page ...

Table S73: ... continued from previous page ...

| Species  | Ref.                | OM2    | OM2-D3T | ODM2   | OM3    | OM3-D3T | ODM3   |
|----------|---------------------|--------|---------|--------|--------|---------|--------|
| gdb 5718 | 1851.8 <sup>a</sup> | 1854.5 | 1854.4  | 1858.4 | 1854.7 | 1854.6  | 1855.5 |
| gdb 5719 | 1852.8 <sup>a</sup> | 1850.4 | 1850.4  | 1850.4 | 1849.9 | 1847.5  | 1844.6 |
| gdb 5720 | 1830.0 <sup>a</sup> | 1829.0 | 1829.0  | 1832.3 | 1825.6 | 1825.6  | 1828.9 |
| gdb 5721 | 1841.6 <sup>a</sup> | 1841.6 | 1841.6  | 1845.3 | 1840.3 | 1840.1  | 1843.3 |
| gdb 5722 | 1849.9 <sup>a</sup> | 1845.9 | 1845.9  | 1845.7 | 1842.4 | 1842.3  | 1840.2 |
| gdb 5723 | 1870.6 <sup>a</sup> | 1866.6 | 1866.6  | 1865.2 | 1863.1 | 1863.0  | 1860.8 |
| gdb 5724 | 1869.2 <sup>a</sup> | 1860.4 | 1860.4  | 1862.3 | 1861.2 | 1861.2  | 1862.6 |
| gdb 5725 | 1867.6 <sup>a</sup> | 1865.2 | 1865.2  | 1866.3 | 1864.0 | 1864.0  | 1866.2 |
| gdb 5726 | 1876.9 <sup>a</sup> | 1872.4 | 1872.4  | 1873.3 | 1874.4 | 1874.4  | 1874.8 |
| gdb 5727 | 1874.6 <sup>a</sup> | 1877.5 | 1877.5  | 1875.8 | 1874.0 | 1874.0  | 1870.9 |
| gdb 5728 | 1875.5 <sup>a</sup> | 1872.8 | 1872.8  | 1874.6 | 1873.6 | 1873.5  | 1873.7 |
| gdb 5729 | 1869.0 <sup>a</sup> | 1875.5 | 1875.5  | 1876.6 | 1874.0 | 1873.9  | 1875.1 |
| gdb 5730 | 1881.8 <sup>a</sup> | 1885.6 | 1885.6  | 1887.9 | 1887.7 | 1887.7  | 1887.7 |
| gdb 5731 | 1871.0 <sup>a</sup> | 1870.0 | 1870.0  | 1868.0 | 1862.3 | 1862.3  | 1861.6 |
| gdb 5732 | 1873.0 <sup>a</sup> | 1873.2 | 1873.2  | 1875.8 | 1866.8 | 1866.8  | 1870.9 |
| gdb 5733 | 1880.2 <sup>a</sup> | 1877.7 | 1877.7  | 1875.7 | 1873.1 | 1873.1  | 1870.5 |
| gdb 5734 | 1877.7 <sup>a</sup> | 1878.0 | 1878.0  | 1880.9 | 1877.4 | 1877.4  | 1878.9 |
| gdb 5735 | 1784.2 <sup>a</sup> | 1769.9 | 1769.9  | 1772.4 | 1767.3 | 1767.3  | 1769.4 |
| gdb 5736 | 1796.2 <sup>a</sup> | 1777.7 | 1777.7  | 1781.2 | 1779.0 | 1779.0  | 1779.7 |
| gdb 5737 | 1804.6 <sup>a</sup> | 1778.3 | 1778.3  | 1784.0 | 1780.3 | 1780.3  | 1783.5 |
| gdb 5738 | 1853.7 <sup>a</sup> | 1856.2 | 1856.2  | 1859.0 | 1851.1 | 1851.1  | 1855.4 |
| gdb 5739 | 1865.4 <sup>a</sup> | 1866.4 | 1866.4  | 1869.1 | 1864.5 | 1864.5  | 1867.0 |
| gdb 5740 | 1866.4 <sup>a</sup> | 1857.0 | 1857.0  | 1859.2 | 1858.2 | 1858.2  | 1860.3 |
| gdb 5741 | 1864.5 <sup>a</sup> | 1863.2 | 1863.2  | 1865.0 | 1862.5 | 1862.5  | 1865.3 |
| gdb 5742 | 1873.0 <sup>a</sup> | 1870.2 | 1870.2  | 1873.1 | 1873.3 | 1873.3  | 1874.9 |
| gdb 5743 | 1896.2 <sup>a</sup> | 1883.2 | 1883.2  | 1885.6 | 1881.8 | 1881.8  | 1884.9 |
| gdb 5744 | 1875.5 <sup>a</sup> | 1874.6 | 1874.6  | 1877.3 | 1873.9 | 1873.9  | 1876.3 |
| gdb 5745 | 1871.9 <sup>a</sup> | 1878.1 | 1878.1  | 1880.7 | 1876.6 | 1876.5  | 1879.9 |
| gdb 5746 | 1879.7 <sup>a</sup> | 1884.4 | 1884.4  | 1888.2 | 1886.6 | 1886.6  | 1888.8 |
| gdb 5747 | 1858.1 <sup>a</sup> | 1847.7 | 1847.7  | 1850.8 | 1844.7 | 1844.7  | 1847.9 |
| gdb 5748 | 1855.8 <sup>a</sup> | 1845.5 | 1845.5  | 1847.3 | 1841.8 | 1841.8  | 1845.1 |
| gdb 5749 | 1863.6 <sup>a</sup> | 1859.6 | 1859.6  | 1861.4 | 1852.6 | 1852.6  | 1856.9 |
| gdb 5750 | 1866.2 <sup>a</sup> | 1855.1 | 1855.1  | 1858.4 | 1855.2 | 1855.2  | 1857.3 |
| gdb 5751 | 1868.3 <sup>a</sup> | 1862.7 | 1862.7  | 1866.1 | 1862.0 | 1861.9  | 1864.4 |
| gdb 5752 | 1849.5 <sup>a</sup> | 1836.1 | 1836.1  | 1839.4 | 1832.0 | 1832.0  | 1833.6 |
| gdb 5753 | 1845.0 <sup>a</sup> | 1831.9 | 1831.9  | 1833.8 | 1827.9 | 1827.9  | 1830.2 |
| gdb 5754 | 1859.2 <sup>a</sup> | 1842.9 | 1842.9  | 1847.0 | 1836.8 | 1836.8  | 1842.4 |
| gdb 5755 | 1853.2 <sup>a</sup> | 1838.7 | 1838.7  | 1840.6 | 1838.0 | 1838.0  | 1838.5 |
| gdb 5756 | 1863.4 <sup>a</sup> | 1846.0 | 1846.0  | 1852.0 | 1845.9 | 1845.9  | 1849.6 |
| gdb 5757 | 1842.7 <sup>a</sup> | 1833.8 | 1833.8  | 1834.0 | 1826.6 | 1826.5  | 1825.7 |
| gdb 5758 | 1837.3 <sup>a</sup> | 1836.7 | 1836.7  | 1836.7 | 1828.8 | 1828.8  | 1828.7 |
| gdb 5759 | 1845.6 <sup>a</sup> | 1842.6 | 1842.6  | 1842.4 | 1837.8 | 1837.8  | 1836.0 |
| gdb 5760 | 1856.5 <sup>a</sup> | 1844.3 | 1844.3  | 1848.4 | 1843.3 | 1843.3  | 1845.7 |
| gdb 5761 | 1884.3 <sup>a</sup> | 1880.4 | 1880.4  | 1883.8 | 1878.8 | 1878.8  | 1881.4 |
| gdb 5762 | 1896.4 <sup>a</sup> | 1883.1 | 1883.1  | 1885.5 | 1881.7 | 1881.6  | 1884.8 |
| gdb 5763 | 1878.6 <sup>a</sup> | 1876.6 | 1876.6  | 1879.8 | 1876.0 | 1876.0  | 1879.0 |
| gdb 5764 | 1872.7 <sup>a</sup> | 1878.5 | 1878.5  | 1881.4 | 1876.7 | 1876.6  | 1880.3 |
| gdb 5765 | 1879.0 <sup>a</sup> | 1884.3 | 1884.3  | 1888.1 | 1886.2 | 1886.2  | 1888.4 |
| gdb 5766 | 1870.2 <sup>a</sup> | 1866.8 | 1866.8  | 1865.5 | 1862.8 | 1862.8  | 1860.7 |
| gdb 5767 | 1868.9 <sup>a</sup> | 1859.1 | 1859.1  | 1860.6 | 1859.5 | 1859.5  | 1861.1 |
| gdb 5768 | 1869.9 <sup>a</sup> | 1867.7 | 1867.6  | 1868.9 | 1866.0 | 1865.9  | 1868.2 |
| gdb 5769 | 1875.4 <sup>a</sup> | 1873.5 | 1873.5  | 1875.5 | 1875.7 | 1875.6  | 1876.4 |
| gdb 5770 | 1883.2 <sup>a</sup> | 1880.7 | 1880.7  | 1881.7 | 1878.5 | 1878.5  | 1878.8 |
| gdb 5771 | 1881.9 <sup>a</sup> | 1880.0 | 1880.0  | 1882.8 | 1879.2 | 1879.2  | 1881.6 |
| gdb 5772 | 1883.5 <sup>a</sup> | 1880.1 | 1880.0  | 1882.3 | 1878.8 | 1878.8  | 1882.4 |
| gdb 5773 | 1890.7 <sup>a</sup> | 1885.8 | 1885.8  | 1887.9 | 1887.8 | 1887.8  | 1889.6 |
| gdb 5774 | 1886.7 <sup>a</sup> | 1895.3 | 1895.3  | 1896.5 | 1885.0 | 1885.0  | 1888.7 |
| gdb 5775 | 1879.3 <sup>a</sup> | 1884.2 | 1884.2  | 1885.6 | 1876.6 | 1876.6  | 1880.0 |
| gdb 5776 | 1885.0 <sup>a</sup> | 1888.8 | 1888.8  | 1890.6 | 1880.0 | 1880.0  | 1885.1 |
| gdb 5777 | 1888.9 <sup>a</sup> | 1892.6 | 1892.6  | 1894.0 | 1888.3 | 1888.3  | 1889.9 |
| gdb 5778 | 1889.3 <sup>a</sup> | 1892.0 | 1892.0  | 1895.5 | 1888.8 | 1888.8  | 1891.9 |
| gdb 5779 | 1895.4 <sup>a</sup> | 1897.1 | 1897.1  | 1894.8 | 1893.5 | 1893.5  | 1890.3 |
| gdb 5780 | 1891.4 <sup>a</sup> | 1897.4 | 1897.4  | 1899.3 | 1896.9 | 1896.9  | 1898.3 |
| gdb 5781 | 1888.7 <sup>a</sup> | 1896.2 | 1896.2  | 1896.5 | 1894.4 | 1894.4  | 1895.2 |
| gdb 5782 | 1900.2 <sup>a</sup> | 1904.8 | 1904.8  | 1905.1 | 1906.5 | 1906.5  | 1905.9 |

... continued on next page ...

Table S73: ... continued from previous page ...

| Species  | Ref.                | OM2    | OM2-D3T | ODM2   | OM3    | OM3-D3T | ODM3   |
|----------|---------------------|--------|---------|--------|--------|---------|--------|
| gdb 5783 | 1871.0 <sup>a</sup> | 1868.1 | 1868.1  | 1867.5 | 1861.3 | 1861.2  | 1860.9 |
| gdb 5784 | 1872.6 <sup>a</sup> | 1873.9 | 1873.9  | 1873.9 | 1875.7 | 1866.8  | 1871.2 |
| gdb 5785 | 1883.1 <sup>a</sup> | 1878.5 | 1878.4  | 1877.9 | 1874.4 | 1874.4  | 1872.5 |
| gdb 5786 | 1877.0 <sup>a</sup> | 1877.5 | 1877.5  | 1879.5 | 1876.1 | 1876.1  | 1878.4 |
| gdb 5787 | 1856.1 <sup>a</sup> | 1846.9 | 1846.9  | 1848.5 | 1843.4 | 1843.4  | 1846.7 |
| gdb 5788 | 1867.1 <sup>a</sup> | 1865.8 | 1865.8  | 1867.7 | 1858.3 | 1858.3  | 1862.5 |
| gdb 5789 | 1865.8 <sup>a</sup> | 1855.5 | 1855.5  | 1858.9 | 1855.8 | 1855.8  | 1858.0 |
| gdb 5790 | 1870.2 <sup>a</sup> | 1868.0 | 1868.0  | 1871.7 | 1866.5 | 1866.5  | 1868.7 |
| gdb 5791 | 1885.2 <sup>a</sup> | 1881.7 | 1881.6  | 1885.1 | 1880.1 | 1880.0  | 1882.7 |
| gdb 5792 | 1854.6 <sup>a</sup> | 1852.9 | 1852.9  | 1854.5 | 1847.5 | 1847.5  | 1850.9 |
| gdb 5793 | 1864.0 <sup>a</sup> | 1865.8 | 1865.8  | 1867.6 | 1857.9 | 1857.9  | 1862.3 |
| gdb 5794 | 1863.6 <sup>a</sup> | 1860.1 | 1860.1  | 1861.6 | 1858.2 | 1858.2  | 1859.8 |
| gdb 5795 | 1868.4 <sup>a</sup> | 1870.1 | 1870.1  | 1873.7 | 1868.1 | 1868.1  | 1870.7 |
| gdb 5796 | 1856.5 <sup>a</sup> | 1858.8 | 1858.8  | 1861.6 | 1853.7 | 1853.6  | 1857.8 |
| gdb 5797 | 1865.2 <sup>a</sup> | 1866.5 | 1866.5  | 1868.9 | 1864.4 | 1864.3  | 1866.6 |
| gdb 5798 | 1867.0 <sup>a</sup> | 1863.3 | 1863.3  | 1866.0 | 1862.0 | 1862.0  | 1863.6 |
| gdb 5799 | 1913.3 <sup>a</sup> | 1915.7 | 1915.7  | 1917.5 | 1917.5 | 1917.5  | 1918.2 |
| gdb 5800 | 1901.7 <sup>a</sup> | 1907.1 | 1907.1  | 1907.5 | 1904.9 | 1904.9  | 1906.4 |
| gdb 5801 | 1895.5 <sup>a</sup> | 1900.1 | 1900.1  | 1900.5 | 1898.7 | 1898.7  | 1901.0 |
| gdb 5802 | 1903.7 <sup>a</sup> | 1905.6 | 1905.6  | 1905.9 | 1907.4 | 1907.3  | 1908.0 |
| gdb 5803 | 1851.1 <sup>a</sup> | 1848.8 | 1848.8  | 1850.3 | 1843.8 | 1843.7  | 1847.2 |
| gdb 5804 | 1863.5 <sup>a</sup> | 1859.9 | 1859.9  | 1862.2 | 1858.1 | 1858.1  | 1859.8 |
| gdb 5805 | 1919.2 <sup>a</sup> | 1915.2 | 1915.2  | 1915.6 | 1912.1 | 1912.1  | 1914.9 |
| gdb 5806 | 1902.2 <sup>a</sup> | 1906.2 | 1906.2  | 1906.7 | 1904.0 | 1904.0  | 1906.3 |
| gdb 5807 | 1911.2 <sup>a</sup> | 1913.0 | 1913.0  | 1913.6 | 1914.1 | 1914.0  | 1914.7 |
| gdb 5808 | 1869.6 <sup>a</sup> | 1869.7 | 1869.7  | 1868.1 | 1861.5 | 1861.5  | 1860.7 |
| gdb 5809 | 1880.6 <sup>a</sup> | 1878.2 | 1878.2  | 1876.6 | 1873.6 | 1873.6  | 1871.2 |
| gdb 5810 | 1890.4 <sup>a</sup> | 1898.4 | 1898.3  | 1899.7 | 1896.7 | 1896.7  | 1900.0 |
| gdb 5811 | 1899.5 <sup>a</sup> | 1904.7 | 1904.7  | 1905.7 | 1906.4 | 1906.4  | 1908.0 |
| gdb 5812 | 1869.7 <sup>a</sup> | 1867.4 | 1867.4  | 1865.4 | 1860.0 | 1860.0  | 1859.2 |
| gdb 5813 | 1881.8 <sup>a</sup> | 1877.9 | 1877.9  | 1877.3 | 1873.8 | 1873.8  | 1871.8 |
| gdb 5814 | 1897.9 <sup>a</sup> | 1902.6 | 1902.6  | 1903.1 | 1900.8 | 1900.8  | 1902.7 |
| gdb 5815 | 1908.2 <sup>a</sup> | 1912.6 | 1912.6  | 1912.8 | 1914.1 | 1914.0  | 1914.4 |
| gdb 5816 | 1913.3 <sup>a</sup> | 1924.2 | 1924.2  | 1923.8 | 1927.2 | 1927.2  | 1926.6 |
| gdb 5817 | 1915.3 <sup>a</sup> | 1910.4 | 1910.3  | 1911.6 | 1907.3 | 1907.2  | 1910.5 |
| gdb 5818 | 1902.2 <sup>a</sup> | 1906.6 | 1906.6  | 1907.6 | 1904.2 | 1904.1  | 1906.4 |
| gdb 5819 | 1898.0 <sup>a</sup> | 1901.6 | 1901.6  | 1903.2 | 1899.6 | 1899.6  | 1901.8 |
| gdb 5820 | 1909.1 <sup>a</sup> | 1910.5 | 1910.5  | 1911.3 | 1911.6 | 1911.5  | 1912.0 |
| gdb 5821 | 1864.1 <sup>a</sup> | 1874.1 | 1874.1  | 1877.1 | 1864.4 | 1864.3  | 1868.4 |
| gdb 5822 | 1866.2 <sup>a</sup> | 1875.0 | 1874.9  | 1878.4 | 1865.7 | 1865.6  | 1869.9 |
| gdb 5823 | 1866.8 <sup>a</sup> | 1871.2 | 1871.2  | 1873.1 | 1863.2 | 1863.2  | 1867.4 |
| gdb 5824 | 1866.1 <sup>a</sup> | 1873.4 | 1873.3  | 1873.6 | 1864.7 | 1864.7  | 1867.7 |
| gdb 5825 | 1856.2 <sup>a</sup> | 1863.8 | 1863.7  | 1866.2 | 1857.5 | 1857.5  | 1861.1 |
| gdb 5826 | 1869.9 <sup>a</sup> | 1873.1 | 1873.1  | 1876.5 | 1870.8 | 1870.6  | 1873.1 |
| gdb 5827 | 1869.5 <sup>a</sup> | 1875.0 | 1874.9  | 1878.1 | 1872.1 | 1872.1  | 1874.0 |
| gdb 5828 | 1865.9 <sup>a</sup> | 1871.4 | 1871.4  | 1873.9 | 1868.2 | 1868.1  | 1870.3 |
| gdb 5829 | 1897.2 <sup>a</sup> | 1902.1 | 1902.1  | 1903.5 | 1900.5 | 1900.5  | 1902.8 |
| gdb 5830 | 1894.3 <sup>a</sup> | 1898.1 | 1898.1  | 1898.4 | 1896.5 | 1896.5  | 1898.8 |
| gdb 5831 | 1902.9 <sup>a</sup> | 1905.4 | 1905.4  | 1907.1 | 1907.5 | 1907.5  | 1908.6 |
| gdb 5832 | 1854.6 <sup>a</sup> | 1852.1 | 1852.1  | 1855.9 | 1848.7 | 1848.6  | 1851.4 |
| gdb 5833 | 1852.5 <sup>a</sup> | 1851.7 | 1851.7  | 1855.5 | 1848.1 | 1848.1  | 1850.8 |
| gdb 5834 | 1853.8 <sup>a</sup> | 1855.0 | 1855.0  | 1858.2 | 1850.2 | 1850.2  | 1852.2 |
| gdb 5835 | 1850.0 <sup>a</sup> | 1856.2 | 1856.2  | 1859.3 | 1850.9 | 1850.9  | 1853.4 |
| gdb 5836 | 1844.9 <sup>a</sup> | 1845.3 | 1845.3  | 1847.9 | 1837.4 | 1837.4  | 1841.1 |
| gdb 5837 | 1857.9 <sup>a</sup> | 1864.1 | 1864.1  | 1866.9 | 1861.9 | 1861.8  | 1862.6 |
| gdb 5838 | 1855.5 <sup>a</sup> | 1852.3 | 1852.3  | 1855.6 | 1851.3 | 1851.3  | 1853.0 |
| gdb 5839 | 1851.7 <sup>a</sup> | 1850.2 | 1850.1  | 1853.4 | 1848.7 | 1848.7  | 1850.7 |
| gdb 5840 | 1844.0 <sup>a</sup> | 1843.7 | 1843.7  | 1845.9 | 1838.3 | 1838.2  | 1841.3 |
| gdb 5841 | 1843.5 <sup>a</sup> | 1840.3 | 1840.3  | 1843.5 | 1834.5 | 1834.4  | 1839.0 |
| gdb 5842 | 1850.8 <sup>a</sup> | 1845.8 | 1845.8  | 1848.4 | 1844.2 | 1844.2  | 1846.7 |
| gdb 5843 | 1851.7 <sup>a</sup> | 1846.9 | 1846.9  | 1851.1 | 1844.7 | 1844.6  | 1848.0 |
| gdb 5844 | 1894.8 <sup>a</sup> | 1903.0 | 1903.0  | 1904.5 | 1901.5 | 1901.5  | 1903.8 |
| gdb 5845 | 1894.0 <sup>a</sup> | 1899.1 | 1899.1  | 1899.8 | 1897.2 | 1897.1  | 1899.7 |
| gdb 5846 | 1900.7 <sup>a</sup> | 1906.4 | 1906.4  | 1908.1 | 1908.5 | 1908.4  | 1909.6 |
| gdb 5847 | 1902.1 <sup>a</sup> | 1906.8 | 1906.8  | 1907.7 | 1904.1 | 1904.1  | 1906.1 |

... continued on next page ...

Table S73: ... continued from previous page ...

| Species  | Ref.                | OM2    | OM2-D3T | ODM2   | OM3    | OM3-D3T | ODM3   |
|----------|---------------------|--------|---------|--------|--------|---------|--------|
| gdb 5848 | 1900.7 <sup>a</sup> | 1904.1 | 1904.1  | 1904.5 | 1901.2 | 1901.2  | 1902.7 |
| gdb 5849 | 1910.1 <sup>a</sup> | 1912.6 | 1912.6  | 1912.6 | 1914.5 | 1913.9  | 1914.8 |
| gdb 5850 | 1878.9 <sup>a</sup> | 1878.6 | 1878.6  | 1879.3 | 1870.9 | 1870.9  | 1875.6 |
| gdb 5851 | 1884.8 <sup>a</sup> | 1883.1 | 1883.1  | 1885.6 | 1881.3 | 1881.2  | 1884.1 |
| gdb 5852 | 1865.3 <sup>a</sup> | 1873.2 | 1873.2  | 1875.4 | 1863.6 | 1863.5  | 1867.5 |
| gdb 5853 | 1856.6 <sup>a</sup> | 1865.0 | 1865.0  | 1867.3 | 1858.0 | 1858.0  | 1861.6 |
| gdb 5854 | 1857.2 <sup>a</sup> | 1862.7 | 1862.6  | 1865.1 | 1856.5 | 1856.5  | 1860.5 |
| gdb 5855 | 1866.5 <sup>a</sup> | 1872.1 | 1872.1  | 1873.9 | 1863.7 | 1863.6  | 1867.8 |
| gdb 5856 | 1865.8 <sup>a</sup> | 1871.3 | 1871.3  | 1873.6 | 1868.0 | 1868.0  | 1870.0 |
| gdb 5857 | 1866.6 <sup>a</sup> | 1869.6 | 1869.6  | 1873.4 | 1867.3 | 1867.2  | 1870.2 |
| gdb 5858 | 1869.7 <sup>a</sup> | 1873.3 | 1873.0  | 1876.7 | 1870.7 | 1870.7  | 1873.2 |
| gdb 5859 | 1876.0 <sup>a</sup> | 1882.8 | 1882.8  | 1883.1 | 1884.3 | 1884.2  | 1883.0 |
| gdb 5860 | 1862.2 <sup>a</sup> | 1870.0 | 1869.9  | 1870.0 | 1868.5 | 1868.4  | 1869.2 |
| gdb 5861 | 1874.1 <sup>a</sup> | 1881.3 | 1881.3  | 1883.2 | 1883.2 | 1883.2  | 1882.9 |
| gdb 5862 | 1884.1 <sup>a</sup> | 1879.8 | 1879.8  | 1881.6 | 1878.5 | 1878.5  | 1880.2 |
| gdb 5863 | 1872.7 <sup>a</sup> | 1878.0 | 1878.0  | 1878.4 | 1879.8 | 1879.8  | 1879.7 |
| gdb 5864 | 1870.4 <sup>a</sup> | 1877.7 | 1877.7  | 1879.9 | 1879.7 | 1879.7  | 1880.6 |
| gdb 5865 | 1859.9 <sup>a</sup> | 1866.4 | 1866.4  | 1866.6 | 1865.1 | 1865.1  | 1866.8 |
| gdb 5866 | 1852.3 <sup>a</sup> | 1849.0 | 1848.8  | 1848.7 | 1845.7 | 1845.6  | 1842.6 |
| gdb 5867 | 1839.8 <sup>a</sup> | 1837.6 | 1837.6  | 1835.2 | 1830.7 | 1830.7  | 1828.8 |
| gdb 5868 | 1842.0 <sup>a</sup> | 1842.5 | 1842.5  | 1843.4 | 1841.2 | 1841.2  | 1841.8 |
| gdb 5869 | 1854.6 <sup>a</sup> | 1853.7 | 1853.7  | 1856.4 | 1856.4 | 1856.4  | 1855.8 |
| gdb 5870 | 1852.1 <sup>a</sup> | 1848.4 | 1848.4  | 1848.0 | 1845.7 | 1845.7  | 1842.8 |
| gdb 5871 | 1841.8 <sup>a</sup> | 1841.1 | 1841.1  | 1842.7 | 1840.9 | 1840.8  | 1841.7 |
| gdb 5872 | 1839.5 <sup>a</sup> | 1837.1 | 1837.1  | 1834.9 | 1830.8 | 1830.8  | 1829.1 |
| gdb 5873 | 1854.1 <sup>a</sup> | 1852.2 | 1852.2  | 1855.0 | 1855.6 | 1855.6  | 1855.3 |
| gdb 5874 | 1836.2 <sup>a</sup> | 1836.6 | 1836.6  | 1838.0 | 1831.9 | 1831.9  | 1834.6 |
| gdb 5875 | 1836.2 <sup>a</sup> | 1835.4 | 1835.4  | 1837.3 | 1830.8 | 1830.8  | 1834.4 |
| gdb 5876 | 1848.9 <sup>a</sup> | 1848.1 | 1848.1  | 1851.2 | 1846.9 | 1846.9  | 1848.4 |
| gdb 5877 | 1848.8 <sup>a</sup> | 1846.7 | 1846.7  | 1850.0 | 1845.8 | 1845.8  | 1848.3 |
| gdb 5878 | 1878.1 <sup>a</sup> | 1883.6 | 1883.4  | 1885.5 | 1886.8 | 1886.7  | 1887.6 |
| gdb 5879 | 1865.8 <sup>a</sup> | 1872.7 | 1872.7  | 1873.0 | 1872.3 | 1872.3  | 1873.6 |
| gdb 5880 | 1836.6 <sup>a</sup> | 1835.6 | 1835.6  | 1833.2 | 1829.7 | 1829.7  | 1827.9 |
| gdb 5881 | 1849.2 <sup>a</sup> | 1846.9 | 1846.9  | 1846.2 | 1844.6 | 1844.6  | 1841.6 |
| gdb 5882 | 1882.0 <sup>a</sup> | 1878.3 | 1878.3  | 1879.0 | 1877.1 | 1877.0  | 1878.6 |
| gdb 5883 | 1858.4 <sup>a</sup> | 1863.7 | 1863.7  | 1863.9 | 1864.2 | 1864.2  | 1866.1 |
| gdb 5884 | 1870.9 <sup>a</sup> | 1874.9 | 1874.9  | 1876.8 | 1879.0 | 1879.0  | 1879.8 |
| gdb 5885 | 1874.7 <sup>a</sup> | 1882.0 | 1881.6  | 1883.4 | 1883.9 | 1883.8  | 1883.5 |
| gdb 5886 | 1863.3 <sup>a</sup> | 1870.6 | 1870.6  | 1871.4 | 1869.3 | 1869.3  | 1870.2 |
| gdb 5887 | 1872.8 <sup>a</sup> | 1881.2 | 1881.2  | 1882.6 | 1882.8 | 1882.8  | 1882.3 |
| gdb 5888 | 1886.5 <sup>a</sup> | 1883.4 | 1883.4  | 1885.3 | 1881.9 | 1881.9  | 1883.4 |
| gdb 5889 | 1874.9 <sup>a</sup> | 1880.8 | 1880.7  | 1883.2 | 1881.7 | 1881.7  | 1882.7 |
| gdb 5890 | 1871.9 <sup>a</sup> | 1880.6 | 1880.5  | 1883.0 | 1880.4 | 1880.4  | 1880.9 |
| gdb 5891 | 1887.0 <sup>a</sup> | 1885.2 | 1885.2  | 1886.8 | 1882.0 | 1882.0  | 1884.9 |
| gdb 5892 | 1864.5 <sup>a</sup> | 1870.7 | 1870.6  | 1871.4 | 1867.6 | 1867.5  | 1869.7 |
| gdb 5893 | 1877.9 <sup>a</sup> | 1883.1 | 1883.1  | 1885.1 | 1886.3 | 1886.3  | 1886.5 |
| gdb 5894 | 1889.8 <sup>a</sup> | 1887.4 | 1887.3  | 1888.7 | 1886.5 | 1886.5  | 1889.2 |
| gdb 5895 | 1866.9 <sup>a</sup> | 1872.9 | 1872.8  | 1873.2 | 1871.9 | 1871.8  | 1873.3 |
| gdb 5896 | 1884.2 <sup>a</sup> | 1882.7 | 1882.7  | 1883.8 | 1880.3 | 1880.3  | 1882.8 |
| gdb 5897 | 1888.8 <sup>a</sup> | 1884.8 | 1884.8  | 1886.3 | 1882.9 | 1882.8  | 1885.6 |
| gdb 5898 | 1863.3 <sup>a</sup> | 1869.3 | 1869.3  | 1870.1 | 1867.3 | 1867.3  | 1869.4 |
| gdb 5899 | 1875.2 <sup>a</sup> | 1878.5 | 1878.5  | 1880.6 | 1881.0 | 1880.9  | 1881.6 |
| gdb 5900 | 1875.5 <sup>a</sup> | 1880.7 | 1880.7  | 1883.3 | 1882.0 | 1882.0  | 1883.0 |
| gdb 5901 | 1866.3 <sup>a</sup> | 1876.0 | 1873.5  | 1873.9 | 1870.7 | 1870.7  | 1872.4 |
| gdb 5902 | 1866.4 <sup>a</sup> | 1871.6 | 1871.6  | 1872.5 | 1868.9 | 1868.9  | 1871.4 |
| gdb 5903 | 1839.0 <sup>a</sup> | 1839.3 | 1839.3  | 1837.3 | 1830.8 | 1830.8  | 1829.5 |
| gdb 5904 | 1837.9 <sup>a</sup> | 1836.1 | 1836.1  | 1834.3 | 1827.7 | 1827.6  | 1827.0 |
| gdb 5905 | 1847.9 <sup>a</sup> | 1845.1 | 1845.1  | 1843.7 | 1840.3 | 1840.3  | 1837.9 |
| gdb 5906 | 1870.5 <sup>a</sup> | 1875.6 | 1875.6  | 1876.8 | 1874.9 | 1874.9  | 1876.2 |
| gdb 5907 | 1870.9 <sup>a</sup> | 1879.2 | 1879.2  | 1881.0 | 1878.1 | 1878.1  | 1879.0 |
| gdb 5908 | 1863.8 <sup>a</sup> | 1872.6 | 1872.6  | 1873.4 | 1868.1 | 1868.1  | 1870.4 |
| gdb 5909 | 1861.6 <sup>a</sup> | 1867.0 | 1867.0  | 1867.9 | 1863.0 | 1862.9  | 1866.0 |
| gdb 5910 | 1870.2 <sup>a</sup> | 1875.4 | 1875.4  | 1877.5 | 1877.9 | 1877.9  | 1878.6 |
| gdb 5911 | 1869.4 <sup>a</sup> | 1877.5 | 1877.5  | 1879.6 | 1879.2 | 1879.2  | 1879.5 |
| gdb 5912 | 1863.7 <sup>a</sup> | 1871.7 | 1871.7  | 1871.4 | 1869.8 | 1869.8  | 1871.1 |

... continued on next page ...

Table S73: ... continued from previous page ...

| Species  | Ref.                | OM2    | OM2-D3T | ODM2   | OM3    | OM3-D3T | ODM3   |
|----------|---------------------|--------|---------|--------|--------|---------|--------|
| gdb 5913 | 1860.8 <sup>a</sup> | 1866.7 | 1866.7  | 1867.1 | 1865.3 | 1865.3  | 1867.2 |
| gdb 5914 | 1872.0 <sup>a</sup> | 1877.7 | 1877.6  | 1880.6 | 1878.3 | 1878.2  | 1879.7 |
| gdb 5915 | 1872.1 <sup>a</sup> | 1879.4 | 1879.4  | 1881.0 | 1879.3 | 1879.3  | 1879.6 |
| gdb 5916 | 1866.5 <sup>a</sup> | 1873.1 | 1873.1  | 1873.8 | 1869.7 | 1869.7  | 1871.7 |
| gdb 5917 | 1863.4 <sup>a</sup> | 1869.3 | 1869.3  | 1870.5 | 1866.2 | 1866.1  | 1868.6 |
| gdb 5918 | 1872.2 <sup>a</sup> | 1877.0 | 1877.0  | 1879.9 | 1879.6 | 1879.6  | 1881.2 |
| gdb 5919 | 1863.5 <sup>a</sup> | 1872.1 | 1869.5  | 1869.5 | 1868.3 | 1868.3  | 1869.7 |
| gdb 5920 | 1863.7 <sup>a</sup> | 1868.1 | 1868.1  | 1868.7 | 1867.0 | 1867.0  | 1869.2 |
| gdb 5921 | 1861.3 <sup>a</sup> | 1866.5 | 1866.5  | 1867.2 | 1864.6 | 1864.6  | 1867.3 |
| gdb 5922 | 1860.9 <sup>a</sup> | 1864.5 | 1864.5  | 1865.5 | 1862.7 | 1862.7  | 1865.7 |
| gdb 5923 | 1869.3 <sup>a</sup> | 1871.9 | 1871.9  | 1873.5 | 1873.6 | 1873.6  | 1875.3 |
| gdb 5924 | 1881.4 <sup>a</sup> | 1878.5 | 1878.5  | 1879.7 | 1875.4 | 1875.4  | 1878.8 |
| gdb 5925 | 1862.4 <sup>a</sup> | 1869.3 | 1869.3  | 1869.8 | 1867.1 | 1867.1  | 1869.8 |
| gdb 5926 | 1859.2 <sup>a</sup> | 1863.3 | 1863.3  | 1864.3 | 1861.8 | 1861.8  | 1865.2 |
| gdb 5927 | 1870.3 <sup>a</sup> | 1872.3 | 1872.2  | 1875.1 | 1874.6 | 1874.5  | 1876.7 |
| gdb 5928 | 1852.5 <sup>a</sup> | 1846.9 | 1846.8  | 1847.3 | 1842.6 | 1842.5  | 1841.3 |
| gdb 5929 | 1843.3 <sup>a</sup> | 1837.8 | 1837.8  | 1836.4 | 1829.5 | 1829.4  | 1829.0 |
| gdb 5930 | 1847.0 <sup>a</sup> | 1843.1 | 1843.1  | 1845.0 | 1840.7 | 1840.7  | 1842.6 |
| gdb 5931 | 1856.2 <sup>a</sup> | 1851.3 | 1851.3  | 1854.8 | 1853.2 | 1853.2  | 1854.2 |
| gdb 5932 | 1841.6 <sup>a</sup> | 1837.1 | 1837.1  | 1835.2 | 1829.0 | 1829.0  | 1828.2 |
| gdb 5933 | 1850.1 <sup>a</sup> | 1845.1 | 1845.1  | 1845.3 | 1841.4 | 1841.3  | 1839.8 |
| gdb 5934 | 1852.7 <sup>a</sup> | 1848.9 | 1848.9  | 1848.5 | 1845.5 | 1845.4  | 1842.7 |
| gdb 5935 | 1841.4 <sup>a</sup> | 1837.0 | 1837.0  | 1834.8 | 1830.0 | 1830.0  | 1828.5 |
| gdb 5936 | 1853.1 <sup>a</sup> | 1847.2 | 1847.2  | 1846.1 | 1842.4 | 1842.4  | 1840.2 |
| gdb 5937 | 1845.5 <sup>a</sup> | 1841.1 | 1841.1  | 1844.1 | 1839.9 | 1839.8  | 1842.1 |
| gdb 5938 | 1845.4 <sup>a</sup> | 1842.0 | 1842.0  | 1843.6 | 1839.8 | 1839.8  | 1841.8 |
| gdb 5939 | 1842.6 <sup>a</sup> | 1838.3 | 1838.3  | 1836.8 | 1829.9 | 1829.9  | 1829.2 |
| gdb 5940 | 1858.3 <sup>a</sup> | 1852.6 | 1852.6  | 1855.0 | 1853.7 | 1853.7  | 1854.1 |
| gdb 5941 | 1841.7 <sup>a</sup> | 1843.1 | 1843.1  | 1845.2 | 1835.3 | 1835.3  | 1838.9 |
| gdb 5942 | 1839.3 <sup>a</sup> | 1839.7 | 1839.6  | 1843.0 | 1832.5 | 1832.4  | 1836.5 |
| gdb 5943 | 1839.1 <sup>a</sup> | 1836.6 | 1836.6  | 1838.5 | 1829.7 | 1829.7  | 1833.9 |
| gdb 5944 | 1850.6 <sup>a</sup> | 1849.5 | 1849.5  | 1853.3 | 1846.2 | 1846.2  | 1848.8 |
| gdb 5945 | 1848.6 <sup>a</sup> | 1846.3 | 1846.3  | 1848.6 | 1842.8 | 1842.8  | 1845.3 |
| gdb 5946 | 1834.1 <sup>a</sup> | 1818.7 | 1818.7  | 1820.4 | 1816.4 | 1816.3  | 1818.7 |
| gdb 5947 | 1832.8 <sup>a</sup> | 1816.8 | 1816.7  | 1817.8 | 1814.3 | 1814.3  | 1817.0 |
| gdb 5948 | 1842.6 <sup>a</sup> | 1826.4 | 1826.4  | 1828.0 | 1827.1 | 1827.1  | 1828.1 |
| gdb 5949 | 1855.8 <sup>a</sup> | 1844.5 | 1844.5  | 1845.0 | 1844.0 | 1844.0  | 1842.4 |
| gdb 5950 | 1863.0 <sup>a</sup> | 1844.2 | 1844.2  | 1847.0 | 1845.2 | 1845.2  | 1848.0 |
| gdb 5951 | 1858.0 <sup>a</sup> | 1840.4 | 1840.4  | 1842.6 | 1841.6 | 1841.6  | 1844.5 |
| gdb 5952 | 1867.6 <sup>a</sup> | 1849.6 | 1849.6  | 1853.7 | 1854.5 | 1854.5  | 1856.5 |
| gdb 5953 | 1849.2 <sup>a</sup> | 1848.2 | 1848.2  | 1848.5 | 1841.2 | 1841.2  | 1842.8 |
| gdb 5954 | 1859.9 <sup>a</sup> | 1858.0 | 1858.0  | 1860.2 | 1855.2 | 1855.2  | 1856.3 |
| gdb 5955 | 1874.1 <sup>a</sup> | 1868.6 | 1868.6  | 1867.3 | 1866.6 | 1866.6  | 1864.1 |
| gdb 5956 | 1889.6 <sup>a</sup> | 1866.9 | 1866.9  | 1868.3 | 1868.4 | 1868.4  | 1870.2 |
| gdb 5957 | 1872.2 <sup>a</sup> | 1866.6 | 1866.6  | 1868.0 | 1867.9 | 1867.9  | 1869.9 |
| gdb 5958 | 1870.6 <sup>a</sup> | 1864.7 | 1864.7  | 1865.3 | 1865.7 | 1865.7  | 1867.6 |
| gdb 5959 | 1880.1 <sup>a</sup> | 1874.4 | 1874.4  | 1877.0 | 1878.3 | 1878.3  | 1879.2 |
| gdb 5960 | 1827.7 <sup>a</sup> | 1817.9 | 1817.9  | 1813.4 | 1809.5 | 1809.5  | 1803.5 |
| gdb 5961 | 1826.1 <sup>a</sup> | 1818.6 | 1818.6  | 1816.7 | 1813.2 | 1813.1  | 1811.4 |
| gdb 5962 | 1825.0 <sup>a</sup> | 1817.1 | 1817.1  | 1814.7 | 1810.7 | 1810.7  | 1809.1 |
| gdb 5963 | 1825.8 <sup>a</sup> | 1818.4 | 1818.4  | 1816.0 | 1811.9 | 1811.8  | 1809.8 |
| gdb 5964 | 1833.8 <sup>a</sup> | 1826.0 | 1826.0  | 1825.5 | 1823.5 | 1823.4  | 1820.7 |
| gdb 5965 | 1836.8 <sup>a</sup> | 1828.6 | 1828.6  | 1826.8 | 1825.5 | 1825.5  | 1821.9 |
| gdb 5966 | 1870.4 <sup>a</sup> | 1866.3 | 1866.2  | 1864.0 | 1858.6 | 1858.6  | 1858.1 |
| gdb 5967 | 1880.7 <sup>a</sup> | 1876.1 | 1876.1  | 1875.7 | 1872.5 | 1872.4  | 1870.9 |
| gdb 5968 | 1887.1 <sup>a</sup> | 1865.5 | 1865.5  | 1866.6 | 1866.7 | 1866.7  | 1868.3 |
| gdb 5969 | 1874.6 <sup>a</sup> | 1869.3 | 1869.3  | 1867.8 | 1867.0 | 1866.9  | 1864.2 |
| gdb 5970 | 1872.1 <sup>a</sup> | 1867.0 | 1867.0  | 1868.1 | 1867.8 | 1867.8  | 1869.3 |
| gdb 5971 | 1870.6 <sup>a</sup> | 1866.3 | 1866.3  | 1867.0 | 1866.1 | 1866.1  | 1867.8 |
| gdb 5972 | 1880.8 <sup>a</sup> | 1875.1 | 1875.1  | 1877.6 | 1878.7 | 1878.7  | 1879.4 |
| gdb 5973 | 1869.5 <sup>a</sup> | 1866.9 | 1866.9  | 1864.4 | 1859.2 | 1859.2  | 1858.5 |
| gdb 5974 | 1880.3 <sup>a</sup> | 1876.2 | 1876.2  | 1874.2 | 1871.9 | 1871.9  | 1869.7 |
| gdb 5975 | 1834.9 <sup>a</sup> | 1819.7 | 1819.7  | 1821.2 | 1816.5 | 1816.5  | 1818.8 |
| gdb 5976 | 1845.4 <sup>a</sup> | 1829.9 | 1829.9  | 1833.1 | 1830.7 | 1830.7  | 1832.2 |
| gdb 5977 | 1820.3 <sup>a</sup> | 1800.6 | 1800.6  | 1803.1 | 1797.1 | 1797.1  | 1796.7 |

... continued on next page ...



Table S73: ... continued from previous page ...

| Species  | Ref.                | OM2    | OM2-D3T | ODM2   | OM3    | OM3-D3T | ODM3   |
|----------|---------------------|--------|---------|--------|--------|---------|--------|
| gdb 5978 | 1825.1 <sup>a</sup> | 1801.9 | 1801.9  | 1805.0 | 1798.9 | 1798.8  | 1801.2 |
| gdb 5979 | 1819.2 <sup>a</sup> | 1796.1 | 1796.1  | 1798.4 | 1793.6 | 1793.6  | 1796.1 |
| gdb 5980 | 1819.9 <sup>a</sup> | 1796.7 | 1796.7  | 1799.5 | 1794.1 | 1794.0  | 1797.1 |
| gdb 5981 | 1829.2 <sup>a</sup> | 1806.2 | 1806.2  | 1809.1 | 1807.0 | 1807.0  | 1808.1 |
| gdb 5982 | 1831.4 <sup>a</sup> | 1807.3 | 1807.3  | 1811.8 | 1808.8 | 1808.8  | 1810.4 |
| gdb 5983 | 1834.6 <sup>a</sup> | 1817.3 | 1817.3  | 1819.5 | 1815.6 | 1815.6  | 1818.5 |
| gdb 5984 | 1832.5 <sup>a</sup> | 1817.2 | 1817.2  | 1818.8 | 1814.4 | 1814.4  | 1817.3 |
| gdb 5985 | 1833.5 <sup>a</sup> | 1817.8 | 1817.8  | 1819.5 | 1815.2 | 1815.2  | 1817.9 |
| gdb 5986 | 1842.1 <sup>a</sup> | 1825.7 | 1825.6  | 1829.1 | 1826.8 | 1826.8  | 1828.7 |
| gdb 5987 | 1844.9 <sup>a</sup> | 1827.7 | 1827.7  | 1831.2 | 1829.1 | 1829.0  | 1830.8 |
| gdb 5988 | 1920.4 <sup>a</sup> | 1915.0 | 1915.0  | 1915.9 | 1913.8 | 1913.7  | 1916.0 |
| gdb 5989 | 1900.5 <sup>a</sup> | 1905.3 | 1905.3  | 1905.2 | 1904.2 | 1904.2  | 1905.9 |
| gdb 5990 | 1910.3 <sup>a</sup> | 1914.1 | 1914.1  | 1915.7 | 1916.6 | 1916.6  | 1917.2 |
| gdb 5991 | 1847.3 <sup>a</sup> | 1847.5 | 1847.5  | 1847.6 | 1841.4 | 1841.4  | 1843.3 |
| gdb 5992 | 1857.7 <sup>a</sup> | 1857.0 | 1857.0  | 1857.4 | 1854.2 | 1854.2  | 1854.4 |
| gdb 5993 | 1869.4 <sup>a</sup> | 1867.3 | 1867.3  | 1864.8 | 1860.1 | 1860.1  | 1859.4 |
| gdb 5994 | 1879.0 <sup>a</sup> | 1876.6 | 1876.6  | 1875.7 | 1873.1 | 1873.1  | 1871.2 |
| gdb 5995 | 1896.6 <sup>a</sup> | 1904.7 | 1904.7  | 1904.7 | 1903.9 | 1903.9  | 1906.1 |
| gdb 5996 | 1906.5 <sup>a</sup> | 1913.9 | 1913.9  | 1914.1 | 1916.4 | 1916.4  | 1916.8 |
| gdb 5997 | 1868.7 <sup>a</sup> | 1867.3 | 1867.3  | 1864.7 | 1859.8 | 1859.8  | 1858.8 |
| gdb 5998 | 1879.4 <sup>a</sup> | 1877.0 | 1877.0  | 1874.7 | 1873.0 | 1872.9  | 1870.3 |
| gdb 5999 | 1920.9 <sup>a</sup> | 1914.6 | 1914.6  | 1915.6 | 1913.0 | 1913.0  | 1915.1 |
| gdb 6000 | 1901.0 <sup>a</sup> | 1905.0 | 1905.0  | 1904.8 | 1903.9 | 1903.9  | 1905.4 |
| gdb 6001 | 1910.6 <sup>a</sup> | 1913.4 | 1913.4  | 1915.1 | 1915.8 | 1915.8  | 1916.3 |
| gdb 6002 | 1845.0 <sup>a</sup> | 1840.2 | 1840.2  | 1842.8 | 1839.5 | 1839.5  | 1841.4 |
| gdb 6003 | 1843.1 <sup>a</sup> | 1839.3 | 1839.3  | 1840.9 | 1838.4 | 1838.4  | 1840.4 |
| gdb 6004 | 1853.4 <sup>a</sup> | 1848.5 | 1848.5  | 1851.9 | 1851.3 | 1851.3  | 1852.2 |
| gdb 6005 | 1837.2 <sup>a</sup> | 1818.8 | 1818.8  | 1822.9 | 1816.0 | 1815.9  | 1818.9 |
| gdb 6006 | 1831.4 <sup>a</sup> | 1816.2 | 1816.2  | 1818.2 | 1813.5 | 1813.4  | 1816.8 |
| gdb 6007 | 1840.6 <sup>a</sup> | 1825.0 | 1825.0  | 1827.4 | 1825.7 | 1825.7  | 1827.3 |
| gdb 6008 | 1821.8 <sup>a</sup> | 1797.7 | 1797.7  | 1800.6 | 1795.5 | 1795.5  | 1798.6 |
| gdb 6009 | 1816.8 <sup>a</sup> | 1793.6 | 1793.6  | 1796.5 | 1791.5 | 1791.4  | 1794.7 |
| gdb 6010 | 1825.8 <sup>a</sup> | 1802.2 | 1802.2  | 1807.0 | 1804.0 | 1804.0  | 1806.2 |
| gdb 6011 | 1824.0 <sup>a</sup> | 1817.5 | 1817.5  | 1815.5 | 1811.9 | 1811.9  | 1810.3 |
| gdb 6012 | 1822.4 <sup>a</sup> | 1815.0 | 1815.0  | 1813.1 | 1808.8 | 1808.8  | 1807.5 |
| gdb 6013 | 1832.1 <sup>a</sup> | 1824.7 | 1824.7  | 1824.7 | 1822.4 | 1822.4  | 1820.1 |
| gdb 6014 | 1885.7 <sup>a</sup> | 1863.3 | 1863.3  | 1865.0 | 1864.8 | 1864.8  | 1867.1 |
| gdb 6015 | 1871.0 <sup>a</sup> | 1865.9 | 1865.9  | 1867.0 | 1866.7 | 1866.7  | 1868.7 |
| gdb 6016 | 1869.0 <sup>a</sup> | 1863.8 | 1863.8  | 1865.1 | 1864.0 | 1864.0  | 1866.2 |
| gdb 6017 | 1878.3 <sup>a</sup> | 1872.8 | 1872.8  | 1875.9 | 1877.0 | 1877.0  | 1878.2 |
| gdb 6018 | 1850.8 <sup>a</sup> | 1839.1 | 1839.1  | 1839.9 | 1839.0 | 1839.0  | 1838.0 |
| gdb 6019 | 1861.8 <sup>a</sup> | 1842.6 | 1842.6  | 1845.6 | 1844.0 | 1844.0  | 1847.7 |
| gdb 6020 | 1856.5 <sup>a</sup> | 1838.6 | 1838.6  | 1841.5 | 1840.0 | 1839.9  | 1843.5 |
| gdb 6021 | 1865.8 <sup>a</sup> | 1847.1 | 1847.1  | 1851.9 | 1852.5 | 1852.5  | 1855.0 |
| gdb 6022 | 1850.2 <sup>a</sup> | 1849.0 | 1849.0  | 1849.3 | 1841.7 | 1841.7  | 1843.9 |
| gdb 6023 | 1846.6 <sup>a</sup> | 1846.0 | 1846.0  | 1846.5 | 1839.6 | 1839.6  | 1842.2 |
| gdb 6024 | 1855.5 <sup>a</sup> | 1854.4 | 1854.4  | 1855.3 | 1851.3 | 1851.3  | 1852.1 |
| gdb 6025 | 1869.7 <sup>a</sup> | 1866.6 | 1866.6  | 1865.5 | 1864.0 | 1864.0  | 1861.6 |
| gdb 6026 | 1871.6 <sup>a</sup> | 1869.6 | 1869.6  | 1870.3 | 1868.8 | 1868.7  | 1870.1 |
| gdb 6027 | 1869.4 <sup>a</sup> | 1865.9 | 1865.9  | 1867.0 | 1865.4 | 1865.4  | 1867.3 |
| gdb 6028 | 1878.5 <sup>a</sup> | 1874.9 | 1874.9  | 1877.8 | 1878.3 | 1878.2  | 1879.0 |
| gdb 6029 | 1867.9 <sup>a</sup> | 1865.6 | 1865.6  | 1863.0 | 1857.6 | 1857.6  | 1856.7 |
| gdb 6030 | 1868.3 <sup>a</sup> | 1865.7 | 1865.7  | 1863.5 | 1857.7 | 1857.7  | 1857.4 |
| gdb 6031 | 1876.4 <sup>a</sup> | 1873.4 | 1873.4  | 1873.0 | 1869.6 | 1869.6  | 1868.2 |
| gdb 6032 | 1895.8 <sup>a</sup> | 1904.2 | 1904.2  | 1904.0 | 1902.5 | 1902.5  | 1904.3 |
| gdb 6033 | 1895.4 <sup>a</sup> | 1903.0 | 1903.0  | 1903.3 | 1901.5 | 1901.5  | 1904.0 |
| gdb 6034 | 1904.2 <sup>a</sup> | 1911.6 | 1911.5  | 1912.4 | 1913.3 | 1913.3  | 1914.2 |
| gdb 6035 | 1920.4 <sup>a</sup> | 1914.3 | 1914.3  | 1915.5 | 1912.5 | 1912.5  | 1915.2 |
| gdb 6036 | 1901.8 <sup>a</sup> | 1905.8 | 1905.8  | 1905.8 | 1904.3 | 1904.3  | 1906.3 |
| gdb 6037 | 1899.2 <sup>a</sup> | 1902.5 | 1902.5  | 1902.8 | 1900.9 | 1900.9  | 1903.3 |
| gdb 6038 | 1907.5 <sup>a</sup> | 1910.1 | 1910.1  | 1912.2 | 1912.6 | 1912.6  | 1914.0 |
| gdb 6039 | 1840.4 <sup>a</sup> | 1838.9 | 1838.8  | 1841.1 | 1832.7 | 1832.6  | 1836.3 |
| gdb 6040 | 1850.3 <sup>a</sup> | 1848.1 | 1848.0  | 1852.1 | 1846.1 | 1846.0  | 1848.8 |
| gdb 6041 | 1853.1 <sup>a</sup> | 1847.2 | 1847.2  | 1847.5 | 1843.2 | 1843.2  | 1841.6 |
| gdb 6042 | 1844.4 <sup>a</sup> | 1841.2 | 1841.2  | 1843.0 | 1840.2 | 1840.2  | 1842.0 |

... continued on next page ...

Table S73: ... continued from previous page ...

| Species  | Ref.                | OM2    | OM2-D3T | ODM2   | OM3    | OM3-D3T | ODM3   |
|----------|---------------------|--------|---------|--------|--------|---------|--------|
| gdb 6043 | 1844.6 <sup>a</sup> | 1841.8 | 1841.8  | 1843.4 | 1839.9 | 1839.9  | 1841.7 |
| gdb 6044 | 1842.5 <sup>a</sup> | 1837.7 | 1837.7  | 1836.4 | 1829.6 | 1829.6  | 1829.1 |
| gdb 6045 | 1856.5 <sup>a</sup> | 1852.0 | 1852.0  | 1854.5 | 1853.4 | 1853.4  | 1853.6 |
| gdb 6046 | 1852.2 <sup>a</sup> | 1848.1 | 1848.1  | 1847.9 | 1845.7 | 1845.7  | 1843.0 |
| gdb 6047 | 1841.6 <sup>a</sup> | 1838.6 | 1838.6  | 1836.6 | 1831.9 | 1831.9  | 1830.3 |
| gdb 6048 | 1840.2 <sup>a</sup> | 1836.2 | 1836.2  | 1834.7 | 1829.0 | 1829.0  | 1828.3 |
| gdb 6049 | 1850.8 <sup>a</sup> | 1846.0 | 1846.0  | 1844.7 | 1842.4 | 1842.4  | 1839.9 |
| gdb 6050 | 1899.6 <sup>a</sup> | 1905.6 | 1905.6  | 1905.6 | 1903.6 | 1903.6  | 1905.1 |
| gdb 6051 | 1899.6 <sup>a</sup> | 1902.9 | 1902.9  | 1903.3 | 1901.2 | 1901.2  | 1903.5 |
| gdb 6052 | 1907.4 <sup>a</sup> | 1910.9 | 1910.9  | 1913.1 | 1912.9 | 1912.9  | 1914.1 |
| gdb 6053 | 1842.4 <sup>a</sup> | 1841.5 | 1841.5  | 1843.4 | 1835.2 | 1835.1  | 1838.6 |
| gdb 6054 | 1838.3 <sup>a</sup> | 1836.5 | 1836.5  | 1838.6 | 1830.5 | 1830.5  | 1834.6 |
| gdb 6055 | 1840.3 <sup>a</sup> | 1837.7 | 1837.7  | 1839.9 | 1831.7 | 1831.7  | 1835.6 |
| gdb 6056 | 1847.7 <sup>a</sup> | 1845.5 | 1845.5  | 1847.9 | 1843.0 | 1842.9  | 1845.3 |
| gdb 6057 | 1851.0 <sup>a</sup> | 1847.5 | 1847.4  | 1849.9 | 1845.1 | 1845.1  | 1847.4 |
| gdb 6058 | 1875.7 <sup>a</sup> | 1882.0 | 1882.0  | 1883.9 | 1884.9 | 1884.9  | 1884.6 |
| gdb 6059 | 1866.5 <sup>a</sup> | 1873.8 | 1873.8  | 1873.2 | 1872.8 | 1872.8  | 1873.3 |
| gdb 6060 | 1867.4 <sup>a</sup> | 1874.1 | 1874.1  | 1874.3 | 1873.0 | 1873.0  | 1873.7 |
| gdb 6061 | 1837.5 <sup>a</sup> | 1836.2 | 1836.2  | 1833.0 | 1829.8 | 1829.7  | 1827.5 |
| gdb 6062 | 1838.3 <sup>a</sup> | 1836.6 | 1836.6  | 1834.1 | 1830.0 | 1829.9  | 1828.0 |
| gdb 6063 | 1846.8 <sup>a</sup> | 1844.5 | 1844.5  | 1842.3 | 1841.5 | 1841.5  | 1837.9 |
| gdb 6064 | 1861.4 <sup>a</sup> | 1866.9 | 1866.9  | 1866.3 | 1867.0 | 1866.9  | 1868.4 |
| gdb 6065 | 1862.1 <sup>a</sup> | 1866.9 | 1866.9  | 1867.1 | 1867.0 | 1867.0  | 1868.8 |
| gdb 6066 | 1870.5 <sup>a</sup> | 1874.9 | 1874.9  | 1876.8 | 1879.0 | 1879.0  | 1879.8 |
| gdb 6067 | 1876.1 <sup>a</sup> | 1881.8 | 1881.7  | 1882.3 | 1883.8 | 1883.8  | 1883.1 |
| gdb 6068 | 1886.9 <sup>a</sup> | 1883.2 | 1883.2  | 1883.8 | 1881.7 | 1881.7  | 1883.7 |
| gdb 6069 | 1866.9 <sup>a</sup> | 1873.4 | 1873.3  | 1873.1 | 1872.3 | 1872.2  | 1873.1 |
| gdb 6070 | 1866.5 <sup>a</sup> | 1873.3 | 1873.3  | 1873.6 | 1872.0 | 1872.0  | 1873.0 |
| gdb 6071 | 1885.4 <sup>a</sup> | 1882.3 | 1882.3  | 1883.8 | 1880.4 | 1880.4  | 1882.9 |
| gdb 6072 | 1865.5 <sup>a</sup> | 1870.4 | 1870.4  | 1870.4 | 1869.3 | 1869.3  | 1871.1 |
| gdb 6073 | 1865.1 <sup>a</sup> | 1869.9 | 1869.9  | 1870.6 | 1868.7 | 1868.7  | 1870.9 |
| gdb 6074 | 1871.9 <sup>a</sup> | 1878.0 | 1878.0  | 1880.6 | 1880.7 | 1880.2  | 1881.5 |
| gdb 6075 | 1858.9 <sup>a</sup> | 1866.8 | 1866.8  | 1867.1 | 1863.8 | 1863.8  | 1866.1 |
| gdb 6076 | 1862.1 <sup>a</sup> | 1866.1 | 1866.1  | 1866.3 | 1864.0 | 1864.0  | 1866.7 |
| gdb 6077 | 1859.0 <sup>a</sup> | 1863.8 | 1863.8  | 1864.8 | 1861.8 | 1861.8  | 1864.9 |
| gdb 6078 | 1868.2 <sup>a</sup> | 1871.7 | 1871.7  | 1873.0 | 1873.1 | 1873.1  | 1874.5 |
| gdb 6079 | 1840.1 <sup>a</sup> | 1837.5 | 1837.5  | 1834.9 | 1829.0 | 1829.0  | 1827.6 |
| gdb 6080 | 1839.3 <sup>a</sup> | 1835.4 | 1835.4  | 1833.6 | 1827.5 | 1827.5  | 1826.7 |
| gdb 6081 | 1848.3 <sup>a</sup> | 1843.4 | 1843.4  | 1843.4 | 1839.4 | 1839.4  | 1837.6 |
| gdb 6082 | 1845.8 <sup>a</sup> | 1843.1 | 1843.0  | 1845.1 | 1841.4 | 1841.4  | 1843.1 |
| gdb 6083 | 1839.9 <sup>a</sup> | 1836.3 | 1836.3  | 1833.9 | 1828.6 | 1828.6  | 1827.5 |
| gdb 6084 | 1838.7 <sup>a</sup> | 1834.6 | 1834.6  | 1833.0 | 1827.5 | 1827.5  | 1826.8 |
| gdb 6085 | 1847.5 <sup>a</sup> | 1842.5 | 1842.5  | 1842.6 | 1839.4 | 1839.4  | 1837.6 |
| gdb 6086 | 1845.2 <sup>a</sup> | 1842.1 | 1842.1  | 1843.8 | 1841.2 | 1841.2  | 1842.8 |
| gdb 6087 | 1858.3 <sup>a</sup> | 1864.7 | 1864.7  | 1864.1 | 1864.1 | 1864.1  | 1865.3 |
| gdb 6088 | 1862.8 <sup>a</sup> | 1868.0 | 1868.0  | 1867.4 | 1867.4 | 1867.4  | 1868.5 |
| gdb 6089 | 1859.3 <sup>a</sup> | 1864.5 | 1864.4  | 1865.2 | 1864.1 | 1864.1  | 1866.4 |
| gdb 6090 | 1868.9 <sup>a</sup> | 1873.2 | 1873.2  | 1874.3 | 1876.3 | 1876.3  | 1876.2 |
| gdb 6091 | 1880.8 <sup>a</sup> | 1876.0 | 1875.9  | 1878.0 | 1873.9 | 1873.9  | 1876.7 |
| gdb 6092 | 1860.6 <sup>a</sup> | 1867.2 | 1867.2  | 1867.4 | 1865.1 | 1865.1  | 1866.9 |
| gdb 6093 | 1864.7 <sup>a</sup> | 1870.3 | 1870.3  | 1870.4 | 1868.5 | 1868.5  | 1870.0 |
| gdb 6094 | 1861.2 <sup>a</sup> | 1867.1 | 1867.1  | 1867.8 | 1865.2 | 1865.1  | 1867.1 |
| gdb 6095 | 1870.1 <sup>a</sup> | 1875.3 | 1875.3  | 1877.8 | 1877.3 | 1877.3  | 1878.2 |

a R.Ramakrishnan, P.O.Dral, M.Rupp, O.A. von Lilienfeld, Sci.Data 1, 140022 (2014)

Table S74: Benchmark Results for the A24-CHNOF Set. Interaction Energies (kcal/mol)

| Species                                                                         | Ref.              | OM2  | OM2-D3T | ODM2 | OM3  | OM3-D3T | ODM3 |
|---------------------------------------------------------------------------------|-------------------|------|---------|------|------|---------|------|
| Single point calculations                                                       |                   |      |         |      |      |         |      |
| Dimer water-ammonia                                                             | -6.5 <sup>a</sup> | -4.5 | -5.0    | -4.5 | -5.4 | -6.0    | -6.4 |
| Dimer water-water                                                               | -5.0 <sup>a</sup> | -4.0 | -4.3    | -4.5 | -4.1 | -4.6    | -4.3 |
| Dimer HCN-HCN                                                                   | -4.7 <sup>a</sup> | -3.4 | -3.8    | -4.4 | -3.8 | -4.3    | -4.8 |
| Dimer HF-HF                                                                     | -4.6 <sup>a</sup> | -1.2 | -1.4    | -2.2 | 0.5  | 0.2     | 0.4  |
| Dimer ammonia-ammonia                                                           | -3.2 <sup>a</sup> | -2.0 | -2.5    | -2.6 | -1.9 | -2.6    | -2.7 |
| Dimer HF-methane                                                                | -1.7 <sup>a</sup> | -0.6 | -1.0    | -1.0 | 0.1  | -0.6    | -0.2 |
| Dimer ammonia-methane                                                           | -0.8 <sup>a</sup> | -0.5 | -0.8    | -0.8 | -0.5 | -0.8    | -0.8 |
| Dimer water-methane                                                             | -0.7 <sup>a</sup> | -0.4 | -0.6    | -0.7 | -0.4 | -0.7    | -0.7 |
| Dimer formaldehyde-formaldehyde                                                 | -4.5 <sup>a</sup> | -3.2 | -4.1    | -4.5 | -2.3 | -3.5    | -3.4 |
| Dimer water-ethene                                                              | -2.6 <sup>a</sup> | -1.7 | -2.4    | -2.3 | -1.2 | -2.0    | -1.8 |
| Dimer formaldehyde-ethene                                                       | -1.6 <sup>a</sup> | -0.7 | -1.5    | -1.5 | -0.4 | -1.4    | -1.3 |
| Dimer ethyne-ethyne                                                             | -1.5 <sup>a</sup> | -1.2 | -1.7    | -1.6 | -0.7 | -1.3    | -1.2 |
| Dimer ammonia-ethene                                                            | -1.4 <sup>a</sup> | -0.7 | -1.3    | -1.3 | -0.4 | -1.2    | -1.2 |
| Dimer ethene-ethene                                                             | -1.1 <sup>a</sup> | -0.2 | -1.1    | -1.1 | -0.0 | -1.1    | -1.1 |
| Dimer methane-ethene                                                            | -0.5 <sup>a</sup> | -0.1 | -0.6    | -0.6 | -0.1 | -0.6    | -0.6 |
| Dimer methane-ethane                                                            | -0.8 <sup>a</sup> | 0.1  | -0.8    | -0.8 | 0.3  | -0.8    | -0.7 |
| Dimer methane-ethane                                                            | -0.6 <sup>a</sup> | 0.1  | -0.6    | -0.6 | 0.2  | -0.6    | -0.6 |
| Dimer methane-methane                                                           | -0.5 <sup>a</sup> | 0.1  | -0.5    | -0.5 | 0.2  | -0.5    | -0.5 |
| Dimer ethene-ethyne                                                             | 0.8 <sup>a</sup>  | 0.6  | -0.2    | -0.3 | 0.5  | -0.5    | -0.5 |
| Dimer ethene-ethene                                                             | 0.9 <sup>a</sup>  | 0.7  | -0.3    | -0.4 | 0.6  | -0.6    | -0.7 |
| Dimer ethyne-ethyne                                                             | 1.1 <sup>a</sup>  | 1.0  | 0.3     | 0.1  | 0.8  | -0.1    | -0.2 |
| Full optimizations of dimers and monomers                                       |                   |      |         |      |      |         |      |
| Dimer water-ammonia                                                             | -6.5 <sup>a</sup> | -4.9 | -5.5    | -4.6 | -6.9 | -7.8    | -9.1 |
| Dimer water-water                                                               | -5.0 <sup>a</sup> | -4.3 | -4.7    | -5.1 | -4.5 | -5.1    | -4.6 |
| Dimer HCN-HCN                                                                   | -4.7 <sup>a</sup> | -3.5 | -4.0    | -4.5 | -4.5 | -5.2    | -6.4 |
| Dimer HF-HF                                                                     | -4.6 <sup>a</sup> | -2.2 | -2.4    | -2.6 | -1.6 | -1.9    | -1.9 |
| Dimer ammonia-ammonia                                                           | -3.2 <sup>a</sup> | -2.0 | -2.5    | -2.5 | -1.9 | -2.5    | -2.7 |
| Dimer HF-methane                                                                | -1.7 <sup>a</sup> | -0.7 | -1.1    | -1.0 | -0.3 | -0.7    | -0.6 |
| Dimer ammonia-methane                                                           | -0.8 <sup>a</sup> | -0.6 | -1.0    | -0.9 | -0.6 | -1.1    | -1.2 |
| Dimer water-methane                                                             | -0.7 <sup>a</sup> | -0.6 | -1.0    | -1.1 | -0.4 | -0.8    | -0.8 |
| Dimer formaldehyde-formaldehyde                                                 | -4.5 <sup>a</sup> | -3.8 | -4.8    | -5.3 | -2.7 | -3.9    | -3.8 |
| Dimer water-ethene                                                              | -2.6 <sup>a</sup> | -2.4 | -3.3    | -3.2 | -1.4 | -2.5    | -2.2 |
| Dimer formaldehyde-ethene                                                       | -1.6 <sup>a</sup> | -1.2 | -2.1    | -2.0 | -0.6 | -2.4    | -2.2 |
| Dimer ethyne-ethyne                                                             | -1.5 <sup>a</sup> | -1.9 | -2.6    | -2.4 | -0.8 | -1.7    | -1.3 |
| Dimer ammonia-ethene                                                            | -1.4 <sup>a</sup> | -1.0 | -1.8    | -1.9 | -0.6 | -1.7    | -1.6 |
| Dimer ethene-ethene                                                             | -1.1 <sup>a</sup> | -0.3 | -1.5    | -1.3 | -0.1 | -1.2    | -1.1 |
| Dimer methane-ethene                                                            | -0.5 <sup>a</sup> | -0.3 | -1.0    | -1.0 | -0.1 | -0.8    | -0.7 |
| Dimer methane-ethane                                                            | -0.8 <sup>a</sup> | -0.4 | -1.0    | -0.8 | -0.0 | -0.8    | -0.7 |
| Dimer methane-ethane                                                            | -0.6 <sup>a</sup> | -0.0 | -0.6    | -0.6 | -0.0 | -0.6    | -0.6 |
| Dimer methane-methane                                                           | -0.5 <sup>a</sup> | -0.0 | -0.8    | -0.5 | 0.0  | -0.5    | -0.5 |
| Full optimizations of dimers, single point calculations on fragments (monomers) |                   |      |         |      |      |         |      |
| Dimer water-ammonia                                                             | -6.5 <sup>a</sup> | -5.0 | -5.6    | -4.7 | -7.2 | -8.1    | -9.6 |
| Dimer water-water                                                               | -5.0 <sup>a</sup> | -4.4 | -4.8    | -5.1 | -4.5 | -5.1    | -4.6 |
| Dimer HCN-HCN                                                                   | -4.7 <sup>a</sup> | -3.5 | -4.0    | -4.5 | -4.5 | -5.3    | -6.6 |
| Dimer HF-HF                                                                     | -4.6 <sup>a</sup> | -2.2 | -2.4    | -2.6 | -1.6 | -1.9    | -1.9 |
| Dimer ammonia-ammonia                                                           | -3.2 <sup>a</sup> | -2.0 | -2.5    | -2.5 | -1.9 | -2.5    | -2.7 |
| Dimer HF-methane                                                                | -1.7 <sup>a</sup> | -0.7 | -1.1    | -1.0 | -0.3 | -0.8    | -0.6 |
| Dimer ammonia-methane                                                           | -0.8 <sup>a</sup> | -0.6 | -1.0    | -1.0 | -0.6 | -1.1    | -1.2 |
| Dimer water-methane                                                             | -0.7 <sup>a</sup> | -0.6 | -1.0    | -1.1 | -0.4 | -0.8    | -0.8 |
| Dimer formaldehyde-formaldehyde                                                 | -4.5 <sup>a</sup> | -3.9 | -4.9    | -5.4 | -2.7 | -3.9    | -3.9 |
| Dimer water-ethene                                                              | -2.6 <sup>a</sup> | -2.5 | -3.3    | -3.3 | -1.5 | -2.6    | -2.3 |
| Dimer formaldehyde-ethene                                                       | -1.6 <sup>a</sup> | -1.2 | -2.1    | -2.1 | -0.6 | -2.4    | -2.3 |
| Dimer ethyne-ethyne                                                             | -1.5 <sup>a</sup> | -1.9 | -2.7    | -2.4 | -0.8 | -1.7    | -1.3 |
| Dimer ammonia-ethene                                                            | -1.4 <sup>a</sup> | -1.0 | -1.8    | -1.9 | -0.6 | -1.7    | -1.6 |
| Dimer ethene-ethene                                                             | -1.1 <sup>a</sup> | -0.3 | -1.5    | -1.4 | -0.1 | -1.2    | -1.1 |
| Dimer methane-ethene                                                            | -0.5 <sup>a</sup> | -0.3 | -1.0    | -1.0 | -0.1 | -0.8    | -0.7 |
| Dimer methane-ethane                                                            | -0.8 <sup>a</sup> | -0.4 | -1.0    | -0.8 | -0.0 | -0.8    | -0.7 |
| Dimer methane-ethane                                                            | -0.6 <sup>a</sup> | -0.0 | -0.6    | -0.6 | -0.0 | -0.6    | -0.6 |
| Dimer methane-methane                                                           | -0.5 <sup>a</sup> | -0.0 | -0.8    | -0.5 | 0.0  | -0.5    | -0.5 |

a J.Rezac and P.Hobza, J.Chem.Theory Comput. 9, 2151 (2013).

Table S75: Benchmark Results for the S22 Set. Interaction Energies (kcal/mol)

| Species                                                                         | Ref.               | OM2   | OM2-D3T | ODM2  | OM3   | OM3-D3T | ODM3  |
|---------------------------------------------------------------------------------|--------------------|-------|---------|-------|-------|---------|-------|
| Single point calculations                                                       |                    |       |         |       |       |         |       |
| ammonia dimer -3.17                                                             | -3.2 <sup>a</sup>  | -2.0  | -2.5    | -2.6  | -1.9  | -2.6    | -2.7  |
| water dimer -5.02                                                               | -5.0 <sup>a</sup>  | -4.0  | -4.3    | -4.6  | -4.1  | -4.6    | -4.2  |
| formic acid dimer -18.61                                                        | -18.8 <sup>a</sup> | -13.6 | -14.8   | -15.6 | -11.5 | -13.3   | -12.9 |
| formamide dimer -15.96                                                          | -16.1 <sup>a</sup> | -13.0 | -14.3   | -15.1 | -11.7 | -13.5   | -13.8 |
| uracil dimer -20.47                                                             | -20.7 <sup>a</sup> | -17.5 | -19.5   | -19.6 | -16.2 | -18.7   | -18.7 |
| 2-pyridoxine 2-aminopyridine -17.0                                              | -17.0 <sup>a</sup> | -11.0 | -13.4   | -13.2 | -11.3 | -14.3   | -16.1 |
| adenine thymine -16.37                                                          | -16.7 <sup>a</sup> | -11.1 | -13.6   | -13.4 | -11.3 | -14.5   | -16.4 |
| methane dimer -0.53                                                             | -0.5 <sup>a</sup>  | 0.1   | -0.5    | -0.5  | 0.1   | -0.5    | -0.5  |
| ethene dimer -1.51                                                              | -1.5 <sup>a</sup>  | -0.4  | -1.5    | -1.4  | 0.1   | -1.3    | -1.1  |
| benzene methane -1.50                                                           | -1.4 <sup>a</sup>  | -0.2  | -1.4    | -1.4  | 0.1   | -1.4    | -1.3  |
| benzene dimer -2.73                                                             | -2.6 <sup>a</sup>  | 1.3   | -2.2    | -2.7  | 1.1   | -3.1    | -3.3  |
| pyrazine dimer -4.42                                                            | -4.2 <sup>a</sup>  | -0.9  | -4.3    | -5.0  | -0.7  | -5.0    | -5.3  |
| uracil dimer -9.88                                                              | -9.7 <sup>a</sup>  | -4.3  | -9.1    | -9.3  | -3.9  | -9.8    | -9.7  |
| indole benzene -5.22                                                            | -4.6 <sup>a</sup>  | 1.5   | -3.3    | -3.9  | 1.4   | -4.5    | -4.6  |
| adenine thymine -12.23                                                          | -11.7 <sup>a</sup> | -4.0  | -10.6   | -11.1 | -3.3  | -11.5   | -11.2 |
| ethene ethyne -1.53                                                             | -1.5 <sup>a</sup>  | -1.1  | -1.7    | -1.6  | -0.7  | -1.4    | -1.3  |
| benzene water -3.28                                                             | -3.3 <sup>a</sup>  | -2.3  | -3.5    | -3.4  | -1.7  | -3.2    | -3.0  |
| benzene ammonia -2.35                                                           | -2.3 <sup>a</sup>  | -1.2  | -2.5    | -2.5  | -0.8  | -2.3    | -2.3  |
| benzene hcn cs -4.46                                                            | -4.5 <sup>a</sup>  | -3.1  | -4.5    | -4.5  | -1.7  | -3.6    | -3.3  |
| benzene dimer -2.74                                                             | -2.7 <sup>a</sup>  | -0.6  | -2.7    | -2.6  | 0.1   | -2.4    | -2.3  |
| indole benzene -5.73                                                            | -5.6 <sup>a</sup>  | -2.4  | -5.2    | -5.0  | -1.2  | -4.6    | -4.2  |
| phenol dimer -7.05                                                              | -7.1 <sup>a</sup>  | -3.8  | -6.1    | -6.2  | -3.2  | -6.0    | -5.6  |
| Full optimizations of dimers and monomers                                       |                    |       |         |       |       |         |       |
| ammonia dimer -3.17                                                             | -3.2 <sup>a</sup>  | -2.0  | -2.5    | -2.5  | -1.9  | -2.5    | -2.7  |
| water dimer -5.02                                                               | -5.0 <sup>a</sup>  | -4.3  | -4.7    | -5.1  | -4.5  | -5.1    | -4.6  |
| formic acid dimer -18.61                                                        | -18.8 <sup>a</sup> | -14.6 | -15.9   | -16.1 | -16.7 | -18.6   | -18.3 |
| formamide dimer -15.96                                                          | -16.1 <sup>a</sup> | -13.0 | -14.5   | -15.1 | -12.4 | -14.6   | -15.2 |
| uracil dimer -20.47                                                             | -20.7 <sup>a</sup> | -18.8 | -20.9   | -20.6 | -19.5 | -22.4   | -22.9 |
| 2-pyridoxine 2-aminopyridine -17.0                                              | -17.0 <sup>a</sup> | -11.4 | -13.9   | -13.3 | -14.8 | -18.2   | -22.2 |
| adenine thymine -16.37                                                          | -16.7 <sup>a</sup> | -11.5 | -14.3   | -14.0 | -15.1 | -18.9   | -22.4 |
| methane dimer -0.53                                                             | -0.5 <sup>a</sup>  | 0.0   | -0.5    | -0.5  | 0.0   | -0.5    | -0.5  |
| ethene dimer -1.51                                                              | -1.5 <sup>a</sup>  | -0.4  | -1.5    | -1.4  | -0.1  | -1.3    | -1.2  |
| benzene methane -1.50                                                           | -1.4 <sup>a</sup>  | -0.2  | -1.5    | -1.5  | -0.1  | -1.4    | -1.3  |
| benzene dimer -2.73                                                             | -2.6 <sup>a</sup>  | -0.6  | -2.9    | -3.1  | -0.0  | -3.5    | -3.6  |
| pyrazine dimer -4.42                                                            | -4.2 <sup>a</sup>  | -1.0  | -5.2    | -6.1  | -0.8  | -5.7    | -5.8  |
| uracil dimer -9.88                                                              | -9.7 <sup>a</sup>  | -4.6  | -10.6   | -10.8 | -3.9  | -10.8   | -10.0 |
| indole benzene -5.22                                                            | -4.6 <sup>a</sup>  | -2.5  | -5.4    | -5.4  | -1.5  | -5.5    | -5.0  |
| adenine thymine -12.23                                                          | -11.7 <sup>a</sup> | -11.6 | -11.8   | -12.4 | -14.6 | -12.1   | -11.2 |
| ethene ethyne -1.53                                                             | -1.5 <sup>a</sup>  | -2.2  | -3.1    | -2.8  | -0.8  | -1.9    | -1.5  |
| benzene water -3.28                                                             | -3.3 <sup>a</sup>  | -2.9  | -4.7    | -4.5  | -1.9  | -3.9    | -3.5  |
| benzene ammonia -2.35                                                           | -2.3 <sup>a</sup>  | -1.4  | -3.3    | -3.4  | -1.2  | -3.4    | -3.2  |
| benzene hcn cs -4.46                                                            | -4.5 <sup>a</sup>  | -3.3  | -4.8    | -4.8  | -1.8  | -3.6    | -3.3  |
| benzene dimer -2.74                                                             | -2.7 <sup>a</sup>  | -0.7  | -3.3    | -3.1  | -0.3  | -3.5    | -3.6  |
| indole benzene -5.73                                                            | -5.6 <sup>a</sup>  | -2.5  | -5.7    | -5.4  | -1.5  | -5.5    | -5.0  |
| phenol dimer -7.05                                                              | -7.1 <sup>a</sup>  | -4.7  | -7.1    | -7.2  | -4.1  | -6.6    | -6.0  |
| Full optimizations of dimers, single point calculations on fragments (monomers) |                    |       |         |       |       |         |       |
| ammonia dimer -3.17                                                             | -3.2 <sup>a</sup>  | -2.0  | -2.5    | -2.5  | -1.9  | -2.5    | -2.7  |
| water dimer -5.02                                                               | -5.0 <sup>a</sup>  | -4.4  | -4.8    | -5.1  | -4.5  | -5.1    | -4.6  |
| formic acid dimer -18.61                                                        | -18.8 <sup>a</sup> | -18.6 | -20.0   | -20.4 | -57.2 | -58.9   | -60.6 |
| formamide dimer -15.96                                                          | -16.1 <sup>a</sup> | -14.3 | -15.8   | -16.8 | -15.2 | -17.6   | -21.5 |
| uracil dimer -20.47                                                             | -20.7 <sup>a</sup> | -21.1 | -23.3   | -23.2 | -27.6 | -30.8   | -36.7 |
| 2-pyridoxine 2-aminopyridine -17.0                                              | -17.0 <sup>a</sup> | -12.8 | -15.4   | -14.7 | -22.5 | -25.7   | -38.2 |
| adenine thymine -16.37                                                          | -16.7 <sup>a</sup> | -13.0 | -16.1   | -15.8 | -23.4 | -26.8   | -36.6 |
| methane dimer -0.53                                                             | -0.5 <sup>a</sup>  | 0.0   | -0.5    | -0.5  | 0.0   | -0.5    | -0.5  |
| ethene dimer -1.51                                                              | -1.5 <sup>a</sup>  | -0.4  | -1.5    | -1.4  | -0.1  | -1.3    | -1.2  |
| benzene methane -1.50                                                           | -1.4 <sup>a</sup>  | -0.2  | -1.5    | -1.6  | -0.1  | -1.4    | -1.3  |
| benzene dimer -2.73                                                             | -2.6 <sup>a</sup>  | -0.6  | -2.9    | -3.1  | -0.0  | -3.5    | -3.6  |
| pyrazine dimer -4.42                                                            | -4.2 <sup>a</sup>  | -1.0  | -5.2    | -6.1  | -0.8  | -5.7    | -5.9  |
| uracil dimer -9.88                                                              | -9.7 <sup>a</sup>  | -5.6  | -11.9   | -12.0 | -4.6  | -11.9   | -10.8 |
| indole benzene -5.22                                                            | -4.6 <sup>a</sup>  | -2.5  | -5.7    | -5.7  | -1.5  | -5.7    | -5.2  |
| adenine thymine -12.23                                                          | -11.7 <sup>a</sup> | -12.7 | -12.7   | -13.3 | -19.0 | -12.8   | -11.9 |
| ethene ethyne -1.53                                                             | -1.5 <sup>a</sup>  | -2.2  | -3.2    | -2.8  | -0.8  | -1.9    | -1.5  |

... continued on next page ...

Table S75: ... continued from previous page ...

| Species               | Ref.              | OM2  | OM2-D3T | ODM2 | OM3  | OM3-D3T | ODM3 |
|-----------------------|-------------------|------|---------|------|------|---------|------|
| benzene water -3.28   | -3.3 <sup>a</sup> | -3.0 | -4.7    | -4.5 | -1.9 | -3.9    | -3.5 |
| benzene ammonia -2.35 | -2.3 <sup>a</sup> | -1.4 | -3.4    | -3.5 | -1.2 | -3.4    | -3.2 |
| benzene hcn cs -4.46  | -4.5 <sup>a</sup> | -3.4 | -4.9    | -4.8 | -1.8 | -3.6    | -3.3 |
| benzene dimer -2.74   | -2.7 <sup>a</sup> | -0.7 | -3.3    | -3.2 | -0.3 | -3.5    | -3.6 |
| indole benzene -5.73  | -5.6 <sup>a</sup> | -2.5 | -5.7    | -5.4 | -1.5 | -5.7    | -5.2 |
| phenol dimer -7.05    | -7.1 <sup>a</sup> | -4.8 | -7.3    | -7.5 | -4.3 | -6.9    | -6.2 |

<sup>a</sup> P.Jurecka, J.Sponer, J.Cerny, and P.Hobza, Phys.Chem.Chem.Phys. 8, 1985 (2006) ; T.Takatani, E.G.Hohenstein, M.Malagoli, M.S.Marshall, and C.D.Sherrill, J.Chem.Phys. 132, 144104 (2010).

Table S76: Benchmark Results for the S66 Set. Interaction Energies (kcal/mol)

| Species                         | Ref.               | OM2   | OM2-D3T | ODM2  | OM3   | OM3-D3T | ODM3  |
|---------------------------------|--------------------|-------|---------|-------|-------|---------|-------|
| Single point calculations       |                    |       |         |       |       |         |       |
| Dimer Water-Water               | -5.0 <sup>a</sup>  | -4.0  | -4.3    | -4.5  | -4.2  | -4.7    | -4.3  |
| Dimer Water-MeOH                | -5.7 <sup>a</sup>  | -3.9  | -4.5    | -4.8  | -3.7  | -4.5    | -4.1  |
| Dimer Water-MeNH2               | -7.0 <sup>a</sup>  | -4.4  | -5.0    | -4.5  | -5.2  | -6.0    | -6.6  |
| Dimer Water-Peptide             | -8.2 <sup>a</sup>  | -6.2  | -7.1    | -7.3  | -5.8  | -7.0    | -6.5  |
| Dimer MeOH-MeOH                 | -5.9 <sup>a</sup>  | -3.3  | -4.1    | -4.4  | -3.1  | -4.1    | -3.8  |
| Dimer MeOH-MeNH2                | -7.7 <sup>a</sup>  | -3.8  | -4.9    | -4.3  | -4.6  | -6.1    | -6.7  |
| Dimer MeOH-Peptide              | -8.3 <sup>a</sup>  | -5.0  | -6.2    | -6.4  | -4.6  | -6.2    | -5.7  |
| Dimer MeOH-Water                | -5.1 <sup>a</sup>  | -3.4  | -3.8    | -4.0  | -3.5  | -4.1    | -3.8  |
| Dimer MeNH2-MeOH                | -3.1 <sup>a</sup>  | -1.4  | -2.4    | -2.6  | -1.2  | -2.4    | -2.5  |
| Dimer MeNH2-MeNH2               | -4.2 <sup>a</sup>  | -1.5  | -2.7    | -2.7  | -1.2  | -2.8    | -3.0  |
| Dimer MeNH2-Peptide             | -5.5 <sup>a</sup>  | -2.8  | -4.5    | -4.8  | -2.2  | -4.3    | -4.4  |
| Dimer MeNH2-Water               | -7.4 <sup>a</sup>  | -4.3  | -5.1    | -4.6  | -5.0  | -6.0    | -6.5  |
| Dimer Peptide-MeOH              | -6.3 <sup>a</sup>  | -3.9  | -5.2    | -5.3  | -3.4  | -5.0    | -4.9  |
| Dimer Peptide-MeNH2             | -7.6 <sup>a</sup>  | -4.1  | -5.7    | -5.5  | -4.2  | -6.2    | -6.9  |
| Dimer Peptide-Peptide           | -8.7 <sup>a</sup>  | -5.3  | -7.3    | -7.4  | -4.5  | -6.9    | -6.9  |
| Dimer Peptide-Water             | -5.2 <sup>a</sup>  | -3.8  | -4.4    | -4.5  | -3.7  | -4.6    | -4.5  |
| Dimer Uracil-Uracil_BP          | -17.4 <sup>a</sup> | -13.8 | -15.8   | -15.9 | -12.7 | -15.1   | -15.3 |
| Dimer Water-Pyridine            | -7.0 <sup>a</sup>  | -3.7  | -4.5    | -4.3  | -4.5  | -5.5    | -6.3  |
| Dimer MeOH-Pyridine             | -7.5 <sup>a</sup>  | -3.2  | -4.3    | -4.0  | -4.1  | -5.5    | -6.4  |
| Dimer AcOH-AcOH                 | -19.4 <sup>a</sup> | -13.8 | -15.2   | -16.0 | -11.9 | -13.8   | -13.3 |
| Dimer AcNH2-AcNH2               | -16.5 <sup>a</sup> | -12.9 | -14.5   | -14.6 | -11.8 | -13.8   | -13.8 |
| Dimer AcOH-Uracil               | -19.8 <sup>a</sup> | -15.4 | -17.0   | -17.5 | -13.8 | -16.0   | -15.8 |
| Dimer AcNH2-Uracil              | -19.5 <sup>a</sup> | -16.1 | -17.8   | -18.0 | -14.9 | -17.1   | -17.3 |
| Dimer Benzene-Benzene_pi-pi     | -2.7 <sup>a</sup>  | 1.2   | -1.9    | -2.3  | 1.0   | -2.7    | -2.9  |
| Dimer Pyridine-Pyridine_pi-pi   | -3.8 <sup>a</sup>  | -0.2  | -3.5    | -4.0  | -0.2  | -4.1    | -4.4  |
| Dimer Uracil-Uracil_pi-pi       | -9.8 <sup>a</sup>  | -4.4  | -9.2    | -9.4  | -3.9  | -10.0   | -9.8  |
| Dimer Benzene-Pyridine_pi-pi    | -3.3 <sup>a</sup>  | 0.5   | -2.8    | -3.2  | 0.3   | -3.5    | -3.7  |
| Dimer Benzene-Uracil_pi-pi      | -5.6 <sup>a</sup>  | -1.1  | -5.2    | -5.6  | -0.9  | -5.9    | -5.6  |
| Dimer Pyridine-Uracil_pi-pi     | -6.7 <sup>a</sup>  | -2.4  | -6.4    | -7.0  | -2.2  | -7.1    | -7.1  |
| Dimer Benzene-Ethene            | -1.4 <sup>a</sup>  | 1.0   | -0.8    | -1.1  | 0.8   | -1.4    | -1.5  |
| Dimer Uracil-Ethene             | -3.3 <sup>a</sup>  | -0.9  | -3.1    | -3.4  | -0.7  | -3.5    | -3.3  |
| Dimer Uracil-Ethyne             | -3.7 <sup>a</sup>  | -1.7  | -3.6    | -3.8  | -1.5  | -3.9    | -3.6  |
| Dimer Pyridine-Ethene           | -1.8 <sup>a</sup>  | 0.5   | -1.4    | -1.7  | 0.3   | -1.9    | -2.0  |
| Dimer Pentane-Pentane           | -3.8 <sup>a</sup>  | -0.2  | -3.9    | -3.7  | 1.1   | -3.4    | -3.0  |
| Dimer Neopentane-Pentane        | -2.6 <sup>a</sup>  | -0.4  | -3.1    | -2.9  | 0.5   | -2.6    | -2.4  |
| Dimer Neopentane-Neopentane     | -1.8 <sup>a</sup>  | -0.5  | -2.5    | -2.4  | 0.1   | -2.2    | -2.1  |
| Dimer Cyclopentane-Neopentane   | -2.4 <sup>a</sup>  | -0.6  | -3.1    | -3.0  | 0.3   | -2.6    | -2.4  |
| Dimer Cyclopentane-Cyclopentane | -3.0 <sup>a</sup>  | -0.4  | -3.2    | -3.1  | 0.7   | -2.7    | -2.4  |
| Dimer Benzene-Cyclopentane      | -3.5 <sup>a</sup>  | 0.3   | -2.8    | -3.0  | 0.8   | -3.0    | -3.0  |
| Dimer Benzene-Neopentane        | -2.8 <sup>a</sup>  | -0.1  | -2.7    | -2.7  | 0.3   | -2.7    | -2.7  |
| Dimer Uracil-Pentane            | -4.8 <sup>a</sup>  | -0.6  | -4.6    | -4.8  | -0.0  | -4.9    | -4.7  |
| Dimer Uracil-Cyclopentane       | -4.1 <sup>a</sup>  | -0.3  | -3.8    | -4.0  | 0.2   | -4.1    | -3.9  |
| Dimer Uracil-Neopentane         | -3.7 <sup>a</sup>  | -0.4  | -3.3    | -3.5  | 0.0   | -3.5    | -3.4  |
| Dimer Ethene-Pentane            | -2.0 <sup>a</sup>  | -0.2  | -2.1    | -2.0  | 0.5   | -1.9    | -1.6  |
| Dimer Ethyne-Pentane            | -1.7 <sup>a</sup>  | 0.1   | -1.5    | -1.6  | 0.3   | -1.6    | -1.6  |
| Dimer Peptide-Pentane           | -4.3 <sup>a</sup>  | -0.4  | -3.7    | -3.8  | 0.6   | -3.6    | -3.3  |
| Dimer Benzene-Benzene_TS        | -2.8 <sup>a</sup>  | -0.6  | -2.7    | -2.7  | 0.0   | -2.6    | -2.5  |
| Dimer Pyridine-Pyridine_TS      | -3.5 <sup>a</sup>  | -1.2  | -3.3    | -3.4  | -0.5  | -3.1    | -3.1  |
| Dimer Benzene-Pyridine_TS       | -3.3 <sup>a</sup>  | -1.0  | -3.2    | -3.2  | -0.3  | -3.0    | -2.9  |
| Dimer Benzene-Ethyne_CH-pi      | -2.9 <sup>a</sup>  | -1.8  | -3.1    | -2.9  | -0.8  | -2.5    | -2.2  |
| Dimer Ethyne-Ethyne_TS          | -1.5 <sup>a</sup>  | -1.2  | -1.7    | -1.6  | -0.7  | -1.3    | -1.2  |
| Dimer Benzene-AcOH_OH-pi        | -4.7 <sup>a</sup>  | -2.7  | -4.5    | -4.5  | -1.6  | -4.0    | -3.7  |
| Dimer Benzene-AcNH2_NH-pi       | -4.4 <sup>a</sup>  | -3.0  | -4.7    | -4.6  | -2.1  | -4.2    | -4.0  |
| Dimer Benzene-Water_OH-pi       | -3.3 <sup>a</sup>  | -2.4  | -3.6    | -3.5  | -1.7  | -3.3    | -3.1  |
| Dimer Benzene-MeOH_OH-pi        | -4.2 <sup>a</sup>  | -1.8  | -3.7    | -3.7  | -1.1  | -3.6    | -3.3  |
| Dimer Benzene-MeNH2_NH-pi       | -3.2 <sup>a</sup>  | -0.8  | -2.9    | -3.0  | -0.3  | -2.8    | -2.8  |
| Dimer Benzene-Peptide_NH-pi     | -5.3 <sup>a</sup>  | -1.9  | -4.7    | -4.7  | -0.9  | -4.4    | -4.2  |
| Dimer Pyridine-Pyridine_CH-N    | -4.2 <sup>a</sup>  | -2.6  | -3.9    | -4.0  | -1.8  | -3.4    | -3.7  |
| Dimer Ethyne-Water_CH-O         | -2.9 <sup>a</sup>  | -3.1  | -3.4    | -3.3  | -2.7  | -3.2    | -2.9  |
| Dimer Ethyne-AcOH_OH-pi         | -5.0 <sup>a</sup>  | -4.0  | -5.0    | -4.9  | -2.9  | -4.2    | -3.8  |
| Dimer Pentane-AcOH              | -2.9 <sup>a</sup>  | -0.6  | -3.1    | -3.2  | -0.0  | -3.1    | -3.0  |
| Dimer Pentane-AcNH2             | -3.5 <sup>a</sup>  | -0.8  | -3.5    | -3.6  | -0.1  | -3.4    | -3.2  |
| Dimer Benzene-AcOH              | -3.7 <sup>a</sup>  | -1.5  | -3.9    | -4.0  | -0.7  | -3.7    | -3.6  |

... continued on next page ...

Table S76: ... continued from previous page ...

| Species                                   | Ref.               | OM2   | OM2-D3T | ODM2  | OM3   | OM3-D3T | ODM3  |
|-------------------------------------------|--------------------|-------|---------|-------|-------|---------|-------|
| Dimer Peptide-Ethene                      | -3.0 <sup>a</sup>  | -1.2  | -2.9    | -3.0  | -0.7  | -2.8    | -2.7  |
| Dimer Pyridine-Ethyne                     | -4.1 <sup>a</sup>  | -3.4  | -4.1    | -4.1  | -2.9  | -3.9    | -4.0  |
| Dimer MeNH2-Pyridine                      | -4.0 <sup>a</sup>  | -1.0  | -2.8    | -3.0  | -0.6  | -2.9    | -3.1  |
| Full optimizations of dimers and monomers |                    |       |         |       |       |         |       |
| Dimer Water-Water                         | -5.0 <sup>a</sup>  | -4.3  | -4.7    | -5.1  | -4.5  | -5.1    | -4.6  |
| Dimer Water-MeOH                          | -5.7 <sup>a</sup>  | -4.0  | -4.7    | -4.9  | -3.9  | -4.8    | -4.4  |
| Dimer Water-MeNH2                         | -7.0 <sup>a</sup>  | -4.3  | -5.1    | -4.5  | -6.1  | -7.2    | -8.7  |
| Dimer Water-Peptide                       | -8.2 <sup>a</sup>  | -6.9  | -7.8    | -8.1  | -6.4  | -7.5    | -7.0  |
| Dimer MeOH-MeOH                           | -5.9 <sup>a</sup>  | -3.4  | -4.3    | -4.5  | -3.3  | -4.3    | -3.9  |
| Dimer MeOH-MeNH2                          | -7.7 <sup>a</sup>  | -4.1  | -5.4    | -4.2  | -6.5  | -8.2    | -9.7  |
| Dimer MeOH-Peptide                        | -8.3 <sup>a</sup>  | -6.4  | -7.6    | -7.6  | -6.0  | -7.5    | -6.8  |
| Dimer MeOH-Water                          | -5.1 <sup>a</sup>  | -3.9  | -4.4    | -4.7  | -4.1  | -4.8    | -4.3  |
| Dimer MeNH2-MeOH                          | -3.1 <sup>a</sup>  | -4.1  | -2.9    | -3.0  | -6.5  | -2.7    | -2.6  |
| Dimer MeNH2-MeNH2                         | -4.2 <sup>a</sup>  | -1.7  | -2.9    | -2.9  | -1.7  | -3.0    | -3.7  |
| Dimer MeNH2-Peptide                       | -5.5 <sup>a</sup>  | -3.5  | -4.9    | -5.3  | -2.7  | -4.5    | -4.6  |
| Dimer MeNH2-Water                         | -7.4 <sup>a</sup>  | -4.3  | -5.1    | -4.5  | -6.1  | -7.2    | -8.7  |
| Dimer Peptide-MeOH                        | -6.3 <sup>a</sup>  | -3.6  | -5.1    | -5.2  | -3.0  | -4.7    | -4.5  |
| Dimer Peptide-MeNH2                       | -7.6 <sup>a</sup>  | -3.7  | -5.4    | -5.0  | -4.0  | -6.0    | -7.4  |
| Dimer Peptide-Peptide                     | -8.7 <sup>a</sup>  | -5.7  | -8.5    | -9.4  | -4.6  | -7.0    | -6.8  |
| Dimer Peptide-Water                       | -5.2 <sup>a</sup>  | -4.0  | -4.9    | -5.1  | -3.5  | -4.5    | -4.4  |
| Dimer Uracil-Uracil_BP                    | -17.4 <sup>a</sup> | -15.5 | -17.6   | -17.1 | -15.6 | -18.6   | -19.1 |
| Dimer Water-Pyridine                      | -7.0 <sup>a</sup>  | -4.0  | -4.9    | -5.0  | -5.5  | -6.7    | -8.4  |
| Dimer MeOH-Pyridine                       | -7.5 <sup>a</sup>  | -3.4  | -4.7    | -4.2  | -5.6  | -7.3    | -9.1  |
| Dimer AcOH-AcOH                           | -19.4 <sup>a</sup> | -15.2 | -16.8   | -17.0 | -18.2 | -20.2   | -19.7 |
| Dimer AcNH2-AcNH2                         | -16.5 <sup>a</sup> | -13.3 | -14.8   | -14.6 | -13.0 | -15.4   | -15.5 |
| Dimer AcOH-Uracil                         | -19.8 <sup>a</sup> | -16.8 | -18.6   | -18.4 | -18.4 | -20.9   | -21.0 |
| Dimer AcNH2-Uracil                        | -19.5 <sup>a</sup> | -16.8 | -18.7   | -18.5 | -17.1 | -19.8   | -20.3 |
| Dimer Benzene-Benzene_pi-pi               | -2.7 <sup>a</sup>  | -0.6  | -2.9    | -3.1  | -0.0  | -3.5    | -3.6  |
| Dimer Pyridine-Pyridine_pi-pi             | -3.8 <sup>a</sup>  | -2.7  | -4.3    | -5.0  | -1.9  | -5.0    | -5.1  |
| Dimer Uracil-Uracil_pi-pi                 | -9.8 <sup>a</sup>  | -4.6  | -10.6   | -10.8 | -3.9  | -10.8   | -10.0 |
| Dimer Benzene-Pyridine_pi-pi              | -3.3 <sup>a</sup>  | -1.3  | -3.5    | -4.1  | -1.2  | -4.3    | -4.4  |
| Dimer Benzene-Uracil_pi-pi                | -5.6 <sup>a</sup>  | -3.4  | -6.6    | -7.1  | -3.1  | -7.3    | -6.6  |
| Dimer Pyridine-Uracil_pi-pi               | -6.7 <sup>a</sup>  | -9.2  | -7.8    | -8.5  | -10.1 | -8.0    | -7.7  |
| Dimer Benzene-Ethene                      | -1.4 <sup>a</sup>  | 0.0   | -1.1    | -1.5  | 0.0   | -1.8    | -1.9  |
| Dimer Uracil-Ethene                       | -3.3 <sup>a</sup>  | -3.9  | -3.9    | -4.2  | -2.3  | -4.0    | -3.6  |
| Dimer Uracil-Ethyne                       | -3.7 <sup>a</sup>  | -5.8  | -4.7    | -4.8  | -3.5  | -4.4    | -3.8  |
| Dimer Pyridine-Ethene                     | -1.8 <sup>a</sup>  | -0.9  | -2.2    | -2.2  | -0.3  | -2.4    | -2.4  |
| Dimer Pentane-Pentane                     | -3.8 <sup>a</sup>  | -0.5  | -4.5    | -4.0  | 0.0   | -3.5    | -3.2  |
| Dimer Neopentane-Pentane                  | -2.6 <sup>a</sup>  | -1.2  | -4.0    | -3.4  | -0.0  | -2.9    | -2.6  |
| Dimer Neopentane-Neopentane               | -1.8 <sup>a</sup>  | -1.5  | -3.7    | -3.1  | -0.0  | -2.6    | -2.2  |
| Dimer Cyclopentane-Neopentane             | -2.4 <sup>a</sup>  | -1.4  | -3.9    | -3.4  | -0.0  | -2.9    | -2.5  |
| Dimer Cyclopentane-Cyclopentan            | -3.0 <sup>a</sup>  | -1.2  | -4.4    | -3.8  | -0.2  | -3.2    | -2.9  |
| Dimer Benzene-Cyclopentane                | -3.5 <sup>a</sup>  | -0.0  | -3.5    | -3.5  | -0.0  | -3.3    | -3.2  |
| Dimer Benzene-Neopentane                  | -2.8 <sup>a</sup>  | -0.4  | -3.7    | -3.5  | -0.1  | -3.2    | -3.0  |
| Dimer Uracil-Pentane                      | -4.8 <sup>a</sup>  | -1.4  | -4.9    | -5.0  | -0.7  | -4.9    | -4.5  |
| Dimer Uracil-Cyclopentane                 | -4.1 <sup>a</sup>  | -1.7  | -4.3    | -4.3  | -0.5  | -4.2    | -3.9  |
| Dimer Uracil-Neopentane                   | -3.7 <sup>a</sup>  | -1.3  | -3.7    | -3.7  | -0.5  | -3.6    | -3.3  |
| Dimer Ethene-Pentane                      | -2.0 <sup>a</sup>  | -0.8  | -2.4    | -2.1  | -0.1  | -1.9    | -1.7  |
| Dimer Ethyne-Pentane                      | -1.7 <sup>a</sup>  | -0.7  | -1.7    | -1.8  | 0.0   | -1.7    | -1.6  |
| Dimer Peptide-Pentane                     | -4.3 <sup>a</sup>  | -0.9  | -4.3    | -4.2  | -0.4  | -3.7    | -3.4  |
| Dimer Benzene-Benzene_TS                  | -2.8 <sup>a</sup>  | -0.7  | -3.3    | -3.1  | -0.3  | -3.5    | -3.6  |
| Dimer Pyridine-Pyridine_TS                | -3.5 <sup>a</sup>  | -2.0  | -3.5    | -5.0  | -1.9  | -5.0    | -3.2  |
| Dimer Benzene-Pyridine_TS                 | -3.3 <sup>a</sup>  | -1.1  | -3.8    | -3.6  | -0.6  | -3.2    | -3.0  |
| Dimer Benzene-Ethyne_CH-pi                | -2.9 <sup>a</sup>  | -2.0  | -3.5    | -3.2  | -0.9  | -2.5    | -2.2  |
| Dimer Ethyne-Ethyne_TS                    | -1.5 <sup>a</sup>  | -1.9  | -2.6    | -2.4  | -0.8  | -1.7    | -1.3  |
| Dimer Benzene-AcOH_OH-pi                  | -4.7 <sup>a</sup>  | -4.3  | -6.3    | -6.1  | -2.4  | -4.9    | -4.4  |
| Dimer Benzene-AcNH2_NH-pi                 | -4.4 <sup>a</sup>  | -3.8  | -5.8    | -5.5  | -2.3  | -4.6    | -4.0  |
| Dimer Benzene-Water_OH-pi                 | -3.3 <sup>a</sup>  | -2.9  | -4.7    | -4.5  | -1.9  | -3.9    | -3.5  |
| Dimer Benzene-MeOH_OH-pi                  | -4.2 <sup>a</sup>  | -2.5  | -4.7    | -4.6  | -1.5  | -4.1    | -3.7  |
| Dimer Benzene-MeNH2_NH-pi                 | -3.2 <sup>a</sup>  | -1.2  | -3.5    | -3.7  | -0.7  | -3.3    | -3.2  |
| Dimer Benzene-Peptide_NH-pi               | -5.3 <sup>a</sup>  | -2.3  | -5.4    | -5.4  | -1.3  | -4.5    | -4.3  |
| Dimer Pyridine-Pyridine_CH-N              | -4.2 <sup>a</sup>  | -2.7  | -4.3    | -4.2  | -2.1  | -4.0    | -4.3  |
| Dimer Ethyne-Water_CH-O                   | -2.9 <sup>a</sup>  | -4.3  | -4.8    | -4.8  | -3.2  | -3.9    | -3.1  |
| Dimer Ethyne-AcOH_OH-pi                   | -5.0 <sup>a</sup>  | -6.1  | -7.3    | -7.0  | -3.5  | -5.1    | -4.5  |
| Dimer Pentane-AcOH                        | -2.9 <sup>a</sup>  | -1.0  | -3.8    | -3.7  | -0.4  | -3.4    | -3.1  |

... continued on next page ...

Table S76: ... continued from previous page ...

| Species                                                                         | Ref.               | OM2   | OM2-D3T | ODM2  | OM3   | OM3-D3T | ODM3  |
|---------------------------------------------------------------------------------|--------------------|-------|---------|-------|-------|---------|-------|
| Dimer Pentane-AcNH2                                                             | -3.5 <sup>a</sup>  | -0.8  | -3.9    | -3.8  | -0.6  | -3.4    | -3.1  |
| Dimer Benzene-AcOH                                                              | -3.7 <sup>a</sup>  | -2.5  | -4.7    | -4.8  | -1.4  | -4.3    | -4.1  |
| Dimer Peptide-Ethene                                                            | -3.0 <sup>a</sup>  | -2.1  | -3.5    | -3.6  | -1.2  | -3.1    | -2.9  |
| Dimer Pyridine-Ethyne                                                           | -4.1 <sup>a</sup>  | -4.1  | -5.1    | -4.5  | -4.4  | -5.8    | -6.1  |
| Dimer MeNH2-Pyridine                                                            | -4.0 <sup>a</sup>  | -2.1  | -3.3    | -3.2  | -1.7  | -3.1    | -3.8  |
| Full optimizations of dimers, single point calculations on fragments (monomers) |                    |       |         |       |       |         |       |
| Dimer Water-Water                                                               | -5.0 <sup>a</sup>  | -4.4  | -4.8    | -5.1  | -4.5  | -5.1    | -4.6  |
| Dimer Water-MeOH                                                                | -5.7 <sup>a</sup>  | -4.0  | -4.7    | -4.9  | -3.9  | -4.8    | -4.4  |
| Dimer Water-MeNH2                                                               | -7.0 <sup>a</sup>  | -4.4  | -5.2    | -4.6  | -6.4  | -7.5    | -9.2  |
| Dimer Water-Peptide                                                             | -8.2 <sup>a</sup>  | -7.0  | -8.0    | -8.2  | -6.7  | -8.0    | -7.3  |
| Dimer MeOH-MeOH                                                                 | -5.9 <sup>a</sup>  | -3.5  | -4.4    | -4.6  | -3.3  | -4.4    | -4.0  |
| Dimer MeOH-MeNH2                                                                | -7.7 <sup>a</sup>  | -4.4  | -5.6    | -4.3  | -7.4  | -9.1    | -10.9 |
| Dimer MeOH-Peptide                                                              | -8.3 <sup>a</sup>  | -6.6  | -7.8    | -7.9  | -6.5  | -8.1    | -7.3  |
| Dimer MeOH-Water                                                                | -5.1 <sup>a</sup>  | -4.0  | -4.5    | -4.8  | -4.2  | -4.9    | -4.4  |
| Dimer MeNH2-MeOH                                                                | -3.1 <sup>a</sup>  | -4.4  | -3.0    | -3.0  | -7.4  | -2.7    | -2.6  |
| Dimer MeNH2-MeNH2                                                               | -4.2 <sup>a</sup>  | -1.8  | -2.9    | -2.9  | -1.7  | -3.0    | -3.8  |
| Dimer MeNH2-Peptide                                                             | -5.5 <sup>a</sup>  | -3.6  | -5.0    | -5.5  | -2.7  | -4.7    | -4.8  |
| Dimer MeNH2-Water                                                               | -7.4 <sup>a</sup>  | -4.4  | -5.1    | -4.5  | -6.4  | -7.5    | -9.2  |
| Dimer Peptide-MeOH                                                              | -6.3 <sup>a</sup>  | -3.8  | -5.2    | -5.4  | -3.2  | -4.8    | -4.6  |
| Dimer Peptide-MeNH2                                                             | -7.6 <sup>a</sup>  | -3.9  | -5.5    | -5.1  | -4.2  | -6.3    | -8.0  |
| Dimer Peptide-Peptide                                                           | -8.7 <sup>a</sup>  | -6.0  | -9.4    | -10.0 | -4.9  | -7.5    | -7.1  |
| Dimer Peptide-Water                                                             | -5.2 <sup>a</sup>  | -4.1  | -4.9    | -5.1  | -3.7  | -4.7    | -4.5  |
| Dimer Uracil-Uracil_BP                                                          | -17.4 <sup>a</sup> | -17.4 | -19.6   | -19.2 | -22.2 | -25.6   | -31.3 |
| Dimer Water-Pyridine                                                            | -7.0 <sup>a</sup>  | -4.0  | -4.9    | -5.0  | -5.6  | -6.9    | -8.8  |
| Dimer MeOH-Pyridine                                                             | -7.5 <sup>a</sup>  | -3.5  | -4.8    | -4.3  | -6.1  | -7.9    | -10.0 |
| Dimer AcOH-AcOH                                                                 | -19.4 <sup>a</sup> | -20.0 | -21.7   | -21.9 | -59.8 | -61.7   | -63.2 |
| Dimer AcNH2-AcNH2                                                               | -16.5 <sup>a</sup> | -14.5 | -16.2   | -16.2 | -16.1 | -18.8   | -22.3 |
| Dimer AcOH-Uracil                                                               | -19.8 <sup>a</sup> | -20.2 | -22.1   | -22.0 | -35.2 | -37.0   | -43.1 |
| Dimer AcNH2-Uracil                                                              | -19.5 <sup>a</sup> | -18.7 | -20.7   | -20.6 | -22.9 | -25.9   | -31.0 |
| Dimer Benzene-Benzene_pi-pi                                                     | -2.7 <sup>a</sup>  | -0.7  | -2.9    | -3.2  | -0.0  | -3.5    | -3.6  |
| Dimer Pyridine-Pyridine_pi-pi                                                   | -3.8 <sup>a</sup>  | -2.8  | -4.3    | -5.0  | -1.9  | -5.1    | -5.1  |
| Dimer Uracil-Uracil_pi-pi                                                       | -9.8 <sup>a</sup>  | -5.6  | -11.9   | -12.0 | -4.6  | -11.9   | -10.8 |
| Dimer Benzene-Pyridine_pi-pi                                                    | -3.3 <sup>a</sup>  | -1.3  | -3.5    | -4.1  | -1.2  | -4.3    | -4.4  |
| Dimer Benzene-Uracil_pi-pi                                                      | -5.6 <sup>a</sup>  | -3.5  | -6.9    | -7.4  | -3.2  | -7.5    | -6.8  |
| Dimer Pyridine-Uracil_pi-pi                                                     | -6.7 <sup>a</sup>  | -9.7  | -8.0    | -8.8  | -12.1 | -8.2    | -7.8  |
| Dimer Benzene-Ethene                                                            | -1.4 <sup>a</sup>  | 0.0   | -1.1    | -1.5  | 0.0   | -1.8    | -1.9  |
| Dimer Uracil-Ethene                                                             | -3.3 <sup>a</sup>  | -4.0  | -4.0    | -4.3  | -2.4  | -4.1    | -3.7  |
| Dimer Uracil-Ethyne                                                             | -3.7 <sup>a</sup>  | -6.0  | -4.8    | -5.0  | -3.6  | -4.5    | -3.9  |
| Dimer Pyridine-Ethene                                                           | -1.8 <sup>a</sup>  | -1.0  | -2.2    | -2.2  | -0.4  | -2.4    | -2.4  |
| Dimer Pentane-Pentane                                                           | -3.8 <sup>a</sup>  | -0.5  | -4.5    | -4.0  | 0.0   | -3.5    | -3.2  |
| Dimer Neopentane-Pentane                                                        | -2.6 <sup>a</sup>  | -1.2  | -4.0    | -3.4  | -0.0  | -2.9    | -2.6  |
| Dimer Neopentane-Neopentane                                                     | -1.8 <sup>a</sup>  | -1.5  | -3.7    | -3.1  | -0.0  | -2.6    | -2.2  |
| Dimer Cyclopentane-Neopentane                                                   | -2.4 <sup>a</sup>  | -1.4  | -3.9    | -3.4  | -0.0  | -2.9    | -2.5  |
| Dimer Cyclopentane-Cyclopentan                                                  | -3.0 <sup>a</sup>  | -1.2  | -4.4    | -3.8  | -0.2  | -3.2    | -2.9  |
| Dimer Benzene-Cyclopentane                                                      | -3.5 <sup>a</sup>  | -0.0  | -3.6    | -3.5  | -0.0  | -3.3    | -3.2  |
| Dimer Benzene-Neopentane                                                        | -2.8 <sup>a</sup>  | -0.4  | -3.7    | -3.6  | -0.1  | -3.2    | -3.0  |
| Dimer Uracil-Pentane                                                            | -4.8 <sup>a</sup>  | -1.5  | -5.1    | -5.2  | -0.8  | -5.0    | -4.6  |
| Dimer Uracil-Cyclopentane                                                       | -4.1 <sup>a</sup>  | -1.8  | -4.4    | -4.4  | -0.5  | -4.3    | -4.0  |
| Dimer Uracil-Neopentane                                                         | -3.7 <sup>a</sup>  | -1.3  | -3.7    | -3.8  | -0.5  | -3.6    | -3.4  |
| Dimer Ethene-Pentane                                                            | -2.0 <sup>a</sup>  | -0.8  | -2.4    | -2.2  | -0.1  | -1.9    | -1.7  |
| Dimer Ethyne-Pentane                                                            | -1.7 <sup>a</sup>  | -0.7  | -1.8    | -1.8  | 0.0   | -1.7    | -1.6  |
| Dimer Peptide-Pentane                                                           | -4.3 <sup>a</sup>  | -0.9  | -4.4    | -4.3  | -0.4  | -3.7    | -3.5  |
| Dimer Benzene-Benzene_TS                                                        | -2.8 <sup>a</sup>  | -0.7  | -3.3    | -3.1  | -0.3  | -3.5    | -3.6  |
| Dimer Pyridine-Pyridine_TS                                                      | -3.5 <sup>a</sup>  | -2.1  | -3.5    | -5.0  | -1.9  | -5.1    | -3.2  |
| Dimer Benzene-Pyridine_TS                                                       | -3.3 <sup>a</sup>  | -1.1  | -3.8    | -3.7  | -0.6  | -3.2    | -3.0  |
| Dimer Benzene-Ethyne_CH-pi                                                      | -2.9 <sup>a</sup>  | -2.1  | -3.5    | -3.2  | -0.9  | -2.5    | -2.2  |
| Dimer Ethyne-Ethyne_TS                                                          | -1.5 <sup>a</sup>  | -1.9  | -2.7    | -2.4  | -0.8  | -1.7    | -1.3  |
| Dimer Benzene-AcOH_OH-pi                                                        | -4.7 <sup>a</sup>  | -4.4  | -6.5    | -6.3  | -2.5  | -5.0    | -4.5  |
| Dimer Benzene-AcNH2_NH-pi                                                       | -4.4 <sup>a</sup>  | -3.8  | -5.9    | -5.6  | -2.3  | -4.6    | -4.1  |
| Dimer Benzene-Water_OH-pi                                                       | -3.3 <sup>a</sup>  | -3.0  | -4.7    | -4.5  | -1.9  | -3.9    | -3.5  |
| Dimer Benzene-MeOH_OH-pi                                                        | -4.2 <sup>a</sup>  | -2.5  | -4.7    | -4.7  | -1.5  | -4.1    | -3.8  |
| Dimer Benzene-MeNH2_NH-pi                                                       | -3.2 <sup>a</sup>  | -1.2  | -3.6    | -3.7  | -0.7  | -3.3    | -3.2  |
| Dimer Benzene-Peptide_NH-pi                                                     | -5.3 <sup>a</sup>  | -2.4  | -5.4    | -5.5  | -1.3  | -4.6    | -4.3  |
| Dimer Pyridine-Pyridine_CH-N                                                    | -4.2 <sup>a</sup>  | -2.8  | -4.3    | -4.2  | -2.1  | -4.1    | -4.4  |
| Dimer Ethyne-Water_CH-O                                                         | -2.9 <sup>a</sup>  | -4.4  | -4.8    | -4.8  | -3.3  | -3.9    | -3.2  |

... continued on next page ...



Table S76: ... continued from previous page ...

| Species                 | Ref.              | OM2  | OM2-D3T | ODM2 | OM3  | OM3-D3T | ODM3 |
|-------------------------|-------------------|------|---------|------|------|---------|------|
| Dimer Ethyne-AcOH_OH-pi | -5.0 <sup>a</sup> | -6.3 | -7.5    | -7.2 | -3.6 | -5.2    | -4.7 |
| Dimer Pentane-AcOH      | -2.9 <sup>a</sup> | -1.1 | -3.9    | -3.8 | -0.4 | -3.4    | -3.2 |
| Dimer Pentane-AcNH2     | -3.5 <sup>a</sup> | -0.9 | -4.0    | -3.9 | -0.6 | -3.5    | -3.2 |
| Dimer Benzene-AcOH      | -3.7 <sup>a</sup> | -2.6 | -4.8    | -4.9 | -1.4 | -4.4    | -4.2 |
| Dimer Peptide-Ethene    | -3.0 <sup>a</sup> | -2.2 | -3.6    | -3.7 | -1.2 | -3.1    | -2.9 |
| Dimer Pyridine-Ethyne   | -4.1 <sup>a</sup> | -4.1 | -5.1    | -4.6 | -4.7 | -6.2    | -6.5 |
| Dimer MeNH2-Pyridine    | -4.0 <sup>a</sup> | -2.1 | -3.3    | -3.2 | -1.7 | -3.1    | -3.8 |

a J.Rezac, K.E.Riley, and P.Hobza, J.Chem.Theory Comput. 7, 2427 (2011) ; 7, 3466 (2011).

Table S77: Benchmark Results for the S66×8 Set. Interaction Energies (kcal/mol)

| Species                  | Ref.              | OM2  | OM2-D3T | ODM2 | OM3  | OM3-D3T | ODM3 |
|--------------------------|-------------------|------|---------|------|------|---------|------|
| Dimer Water-Water_0.90   | -4.6 <sup>a</sup> | -4.3 | -4.7    | -5.0 | -4.4 | -4.9    | -4.5 |
| Dimer Water-Water_0.95   | -4.9 <sup>a</sup> | -4.1 | -4.5    | -4.7 | -4.3 | -4.8    | -4.4 |
| Dimer Water-Water_1.00   | -4.9 <sup>a</sup> | -3.8 | -4.2    | -4.3 | -4.0 | -4.5    | -4.2 |
| Dimer Water-Water_1.05   | -4.7 <sup>a</sup> | -3.5 | -3.8    | -3.9 | -3.8 | -4.3    | -4.0 |
| Dimer Water-Water_1.10   | -4.5 <sup>a</sup> | -3.2 | -3.5    | -3.6 | -3.6 | -4.0    | -3.7 |
| Dimer Water-Water_1.25   | -3.5 <sup>a</sup> | -2.4 | -2.7    | -2.7 | -2.8 | -3.2    | -3.0 |
| Dimer Water-Water_1.50   | -2.1 <sup>a</sup> | -1.6 | -1.8    | -1.8 | -1.9 | -2.1    | -2.0 |
| Dimer Water-Water_2.00   | -0.9 <sup>a</sup> | -0.8 | -0.8    | -0.8 | -1.0 | -1.0    | -0.9 |
| Dimer Water-MeOH_0.90    | -5.2 <sup>a</sup> | -4.0 | -4.7    | -5.0 | -3.5 | -4.5    | -4.0 |
| Dimer Water-MeOH_0.95    | -5.5 <sup>a</sup> | -4.0 | -4.6    | -4.9 | -3.7 | -4.5    | -4.1 |
| Dimer Water-MeOH_1.00    | -5.6 <sup>a</sup> | -3.8 | -4.4    | -4.6 | -3.6 | -4.4    | -4.1 |
| Dimer Water-MeOH_1.05    | -5.4 <sup>a</sup> | -3.5 | -4.1    | -4.3 | -3.5 | -4.2    | -3.9 |
| Dimer Water-MeOH_1.10    | -5.1 <sup>a</sup> | -3.3 | -3.8    | -3.9 | -3.3 | -4.0    | -3.8 |
| Dimer Water-MeOH_1.25    | -3.9 <sup>a</sup> | -2.5 | -2.9    | -3.0 | -2.8 | -3.3    | -3.1 |
| Dimer Water-MeOH_1.50    | -2.4 <sup>a</sup> | -1.7 | -1.9    | -2.0 | -1.9 | -2.2    | -2.1 |
| Dimer Water-MeOH_2.00    | -1.0 <sup>a</sup> | -0.8 | -0.9    | -0.9 | -0.9 | -1.0    | -1.0 |
| Dimer Water-MeNH2_0.90   | -6.5 <sup>a</sup> | -4.5 | -5.3    | -4.3 | -5.7 | -6.7    | -7.5 |
| Dimer Water-MeNH2_0.95   | -6.9 <sup>a</sup> | -4.5 | -5.2    | -4.5 | -5.4 | -6.3    | -6.9 |
| Dimer Water-MeNH2_1.00   | -6.9 <sup>a</sup> | -4.3 | -4.9    | -4.4 | -5.0 | -5.8    | -6.3 |
| Dimer Water-MeNH2_1.05   | -6.6 <sup>a</sup> | -4.0 | -4.6    | -4.3 | -4.5 | -5.3    | -5.6 |
| Dimer Water-MeNH2_1.10   | -6.3 <sup>a</sup> | -3.7 | -4.2    | -4.1 | -4.1 | -4.8    | -5.1 |
| Dimer Water-MeNH2_1.25   | -4.9 <sup>a</sup> | -2.8 | -3.3    | -3.3 | -3.1 | -3.6    | -3.8 |
| Dimer Water-MeNH2_1.50   | -3.0 <sup>a</sup> | -1.8 | -2.1    | -2.2 | -2.0 | -2.3    | -2.4 |
| Dimer Water-MeNH2_2.00   | -1.1 <sup>a</sup> | -0.8 | -0.9    | -1.0 | -0.9 | -1.0    | -1.1 |
| Dimer Water-Peptide_0.90 | -7.6 <sup>a</sup> | -6.5 | -7.5    | -7.7 | -6.0 | -7.3    | -6.7 |
| Dimer Water-Peptide_0.95 | -8.1 <sup>a</sup> | -6.4 | -7.3    | -7.5 | -5.9 | -7.2    | -6.6 |
| Dimer Water-Peptide_1.00 | -8.1 <sup>a</sup> | -6.0 | -6.9    | -7.1 | -5.7 | -6.9    | -6.3 |
| Dimer Water-Peptide_1.05 | -7.8 <sup>a</sup> | -5.6 | -6.4    | -6.6 | -5.4 | -6.5    | -6.0 |
| Dimer Water-Peptide_1.10 | -7.5 <sup>a</sup> | -5.2 | -6.0    | -6.1 | -5.1 | -6.1    | -5.7 |
| Dimer Water-Peptide_1.25 | -6.0 <sup>a</sup> | -4.1 | -4.7    | -4.8 | -4.2 | -5.0    | -4.7 |
| Dimer Water-Peptide_1.50 | -3.8 <sup>a</sup> | -2.8 | -3.2    | -3.2 | -3.0 | -3.5    | -3.3 |
| Dimer Water-Peptide_2.00 | -1.4 <sup>a</sup> | -1.3 | -1.4    | -1.4 | -1.4 | -1.5    | -1.5 |
| Dimer MeOH-MeOH_0.90     | -5.3 <sup>a</sup> | -3.3 | -4.2    | -4.5 | -2.9 | -4.1    | -3.7 |
| Dimer MeOH-MeOH_0.95     | -5.7 <sup>a</sup> | -3.4 | -4.2    | -4.5 | -3.1 | -4.2    | -3.8 |
| Dimer MeOH-MeOH_1.00     | -5.7 <sup>a</sup> | -3.3 | -4.1    | -4.3 | -3.1 | -4.1    | -3.8 |
| Dimer MeOH-MeOH_1.05     | -5.6 <sup>a</sup> | -3.1 | -3.8    | -4.0 | -3.0 | -3.9    | -3.7 |
| Dimer MeOH-MeOH_1.10     | -5.3 <sup>a</sup> | -2.8 | -3.5    | -3.7 | -2.9 | -3.7    | -3.5 |
| Dimer MeOH-MeOH_1.25     | -4.1 <sup>a</sup> | -2.2 | -2.7    | -2.8 | -2.4 | -3.1    | -2.9 |
| Dimer MeOH-MeOH_1.50     | -2.5 <sup>a</sup> | -1.4 | -1.8    | -1.8 | -1.7 | -2.0    | -2.0 |
| Dimer MeOH-MeOH_2.00     | -1.0 <sup>a</sup> | -0.7 | -0.8    | -0.8 | -0.8 | -0.9    | -0.9 |
| Dimer MeOH-MeNH2_0.90    | -7.0 <sup>a</sup> | -3.8 | -5.1    | -4.0 | -5.1 | -6.8    | -7.7 |
| Dimer MeOH-MeNH2_0.95    | -7.5 <sup>a</sup> | -3.9 | -5.1    | -4.2 | -4.9 | -6.4    | -7.1 |
| Dimer MeOH-MeNH2_1.00    | -7.5 <sup>a</sup> | -3.7 | -4.8    | -4.3 | -4.5 | -5.9    | -6.5 |
| Dimer MeOH-MeNH2_1.05    | -7.3 <sup>a</sup> | -3.5 | -4.5    | -4.2 | -4.1 | -5.4    | -5.8 |
| Dimer MeOH-MeNH2_1.10    | -7.0 <sup>a</sup> | -3.3 | -4.2    | -4.0 | -3.8 | -4.9    | -5.2 |
| Dimer MeOH-MeNH2_1.25    | -5.5 <sup>a</sup> | -2.5 | -3.2    | -3.3 | -2.8 | -3.7    | -3.8 |
| Dimer MeOH-MeNH2_1.50    | -3.3 <sup>a</sup> | -1.6 | -2.0    | -2.1 | -1.8 | -2.3    | -2.4 |
| Dimer MeOH-MeNH2_2.00    | -1.3 <sup>a</sup> | -0.7 | -0.9    | -0.9 | -0.8 | -1.0    | -1.0 |
| Dimer MeOH-Peptide_0.90  | -7.6 <sup>a</sup> | -5.2 | -6.6    | -6.7 | -4.7 | -6.4    | -5.8 |
| Dimer MeOH-Peptide_0.95  | -8.1 <sup>a</sup> | -5.2 | -6.5    | -6.6 | -4.7 | -6.4    | -5.8 |
| Dimer MeOH-Peptide_1.00  | -8.2 <sup>a</sup> | -4.9 | -6.1    | -6.3 | -4.5 | -6.1    | -5.6 |
| Dimer MeOH-Peptide_1.05  | -8.0 <sup>a</sup> | -4.6 | -5.7    | -5.8 | -4.3 | -5.8    | -5.3 |
| Dimer MeOH-Peptide_1.10  | -7.7 <sup>a</sup> | -4.2 | -5.3    | -5.4 | -4.1 | -5.4    | -5.0 |
| Dimer MeOH-Peptide_1.25  | -6.2 <sup>a</sup> | -3.2 | -4.1    | -4.2 | -3.3 | -4.4    | -4.1 |
| Dimer MeOH-Peptide_1.50  | -3.6 <sup>a</sup> | -2.0 | -2.5    | -2.6 | -2.1 | -2.8    | -2.7 |
| Dimer MeOH-Peptide_2.00  | -1.1 <sup>a</sup> | -0.7 | -0.9    | -0.9 | -0.8 | -1.0    | -0.9 |
| Dimer MeOH-Water_0.90    | -4.6 <sup>a</sup> | -3.6 | -4.2    | -4.5 | -3.6 | -4.4    | -4.0 |
| Dimer MeOH-Water_0.95    | -5.0 <sup>a</sup> | -3.5 | -4.0    | -4.3 | -3.6 | -4.3    | -3.9 |
| Dimer MeOH-Water_1.00    | -5.0 <sup>a</sup> | -3.3 | -3.7    | -3.9 | -3.4 | -4.1    | -3.8 |
| Dimer MeOH-Water_1.05    | -4.8 <sup>a</sup> | -3.0 | -3.4    | -3.6 | -3.3 | -3.8    | -3.6 |
| Dimer MeOH-Water_1.10    | -4.6 <sup>a</sup> | -2.7 | -3.2    | -3.2 | -3.1 | -3.6    | -3.4 |
| Dimer MeOH-Water_1.25    | -3.6 <sup>a</sup> | -2.1 | -2.4    | -2.4 | -2.5 | -2.9    | -2.7 |
| Dimer MeOH-Water_1.50    | -2.2 <sup>a</sup> | -1.4 | -1.6    | -1.6 | -1.7 | -1.9    | -1.8 |
| Dimer MeOH-Water_2.00    | -0.9 <sup>a</sup> | -0.7 | -0.7    | -0.7 | -0.8 | -0.9    | -0.8 |

... continued on next page ...

Table S77: ... continued from previous page ...

| Species                     | Ref.               | OM2   | OM2-D3T | ODM2  | OM3   | OM3-D3T | ODM3  |
|-----------------------------|--------------------|-------|---------|-------|-------|---------|-------|
| Dimer MeNH2-MeOH_0.90       | -2.8 <sup>a</sup>  | -1.5  | -2.5    | -2.8  | -0.9  | -2.3    | -2.5  |
| Dimer MeNH2-MeOH_0.95       | -3.0 <sup>a</sup>  | -1.5  | -2.5    | -2.7  | -1.2  | -2.4    | -2.5  |
| Dimer MeNH2-MeOH_1.00       | -3.0 <sup>a</sup>  | -1.4  | -2.3    | -2.5  | -1.2  | -2.3    | -2.5  |
| Dimer MeNH2-MeOH_1.05       | -2.9 <sup>a</sup>  | -1.3  | -2.1    | -2.2  | -1.2  | -2.2    | -2.3  |
| Dimer MeNH2-MeOH_1.10       | -2.7 <sup>a</sup>  | -1.2  | -1.9    | -2.0  | -1.2  | -2.0    | -2.2  |
| Dimer MeNH2-MeOH_1.25       | -2.0 <sup>a</sup>  | -0.8  | -1.4    | -1.4  | -0.9  | -1.5    | -1.6  |
| Dimer MeNH2-MeOH_1.50       | -1.1 <sup>a</sup>  | -0.5  | -0.8    | -0.8  | -0.6  | -0.9    | -0.9  |
| Dimer MeNH2-MeOH_2.00       | -0.4 <sup>a</sup>  | -0.2  | -0.3    | -0.3  | -0.3  | -0.3    | -0.4  |
| Dimer MeNH2-MeNH2_0.90      | -3.7 <sup>a</sup>  | -0.8  | -2.1    | -2.0  | -0.4  | -2.2    | -2.6  |
| Dimer MeNH2-MeNH2_0.95      | -4.1 <sup>a</sup>  | -1.3  | -2.6    | -2.5  | -1.0  | -2.7    | -2.9  |
| Dimer MeNH2-MeNH2_1.00      | -4.2 <sup>a</sup>  | -1.5  | -2.7    | -2.7  | -1.3  | -2.8    | -3.0  |
| Dimer MeNH2-MeNH2_1.05      | -4.0 <sup>a</sup>  | -1.6  | -2.7    | -2.8  | -1.4  | -2.7    | -3.0  |
| Dimer MeNH2-MeNH2_1.10      | -3.8 <sup>a</sup>  | -1.6  | -2.5    | -2.7  | -1.4  | -2.6    | -2.9  |
| Dimer MeNH2-MeNH2_1.25      | -2.8 <sup>a</sup>  | -1.2  | -1.9    | -2.1  | -1.2  | -2.0    | -2.2  |
| Dimer MeNH2-MeNH2_1.50      | -1.3 <sup>a</sup>  | -0.6  | -1.0    | -1.0  | -0.6  | -1.0    | -1.1  |
| Dimer MeNH2-MeNH2_2.00      | -0.4 <sup>a</sup>  | -0.2  | -0.3    | -0.3  | -0.2  | -0.3    | -0.4  |
| Dimer MeNH2-Peptide_0.90    | -4.9 <sup>a</sup>  | -2.8  | -4.7    | -5.0  | -1.7  | -4.2    | -4.2  |
| Dimer MeNH2-Peptide_0.95    | -5.4 <sup>a</sup>  | -2.9  | -4.6    | -4.9  | -2.0  | -4.3    | -4.4  |
| Dimer MeNH2-Peptide_1.00    | -5.4 <sup>a</sup>  | -2.8  | -4.4    | -4.7  | -2.2  | -4.3    | -4.4  |
| Dimer MeNH2-Peptide_1.05    | -5.2 <sup>a</sup>  | -2.6  | -4.2    | -4.4  | -2.2  | -4.1    | -4.3  |
| Dimer MeNH2-Peptide_1.10    | -4.9 <sup>a</sup>  | -2.5  | -3.9    | -4.1  | -2.2  | -3.9    | -4.1  |
| Dimer MeNH2-Peptide_1.25    | -3.2 <sup>a</sup>  | -1.6  | -2.5    | -2.7  | -1.6  | -2.6    | -2.8  |
| Dimer MeNH2-Peptide_1.50    | -1.4 <sup>a</sup>  | -0.8  | -1.2    | -1.3  | -0.8  | -1.2    | -1.4  |
| Dimer MeNH2-Peptide_2.00    | -0.5 <sup>a</sup>  | -0.3  | -0.5    | -0.5  | -0.3  | -0.5    | -0.5  |
| Dimer MeNH2-Water_0.90      | -6.7 <sup>a</sup>  | -4.2  | -5.1    | -4.1  | -5.2  | -6.4    | -7.1  |
| Dimer MeNH2-Water_0.95      | -7.2 <sup>a</sup>  | -4.4  | -5.2    | -4.5  | -5.1  | -6.2    | -6.8  |
| Dimer MeNH2-Water_1.00      | -7.2 <sup>a</sup>  | -4.3  | -5.0    | -4.6  | -4.9  | -5.9    | -6.3  |
| Dimer MeNH2-Water_1.05      | -7.0 <sup>a</sup>  | -4.1  | -4.8    | -4.5  | -4.5  | -5.5    | -5.8  |
| Dimer MeNH2-Water_1.10      | -6.7 <sup>a</sup>  | -3.8  | -4.5    | -4.3  | -4.2  | -5.1    | -5.3  |
| Dimer MeNH2-Water_1.25      | -5.2 <sup>a</sup>  | -3.0  | -3.6    | -3.6  | -3.3  | -3.9    | -4.1  |
| Dimer MeNH2-Water_1.50      | -3.2 <sup>a</sup>  | -2.0  | -2.3    | -2.4  | -2.2  | -2.5    | -2.6  |
| Dimer MeNH2-Water_2.00      | -1.2 <sup>a</sup>  | -0.9  | -1.0    | -1.1  | -1.0  | -1.1    | -1.2  |
| Dimer Peptide-MeOH_0.90     | -5.7 <sup>a</sup>  | -3.8  | -5.3    | -5.4  | -2.9  | -4.8    | -4.7  |
| Dimer Peptide-MeOH_0.95     | -6.1 <sup>a</sup>  | -3.9  | -5.3    | -5.4  | -3.3  | -5.0    | -4.9  |
| Dimer Peptide-MeOH_1.00     | -6.2 <sup>a</sup>  | -3.9  | -5.1    | -5.2  | -3.4  | -5.0    | -4.9  |
| Dimer Peptide-MeOH_1.05     | -6.0 <sup>a</sup>  | -3.7  | -4.9    | -5.0  | -3.4  | -4.9    | -4.8  |
| Dimer Peptide-MeOH_1.10     | -5.7 <sup>a</sup>  | -3.5  | -4.6    | -4.6  | -3.3  | -4.7    | -4.6  |
| Dimer Peptide-MeOH_1.25     | -4.6 <sup>a</sup>  | -2.8  | -3.7    | -3.7  | -2.9  | -3.9    | -3.8  |
| Dimer Peptide-MeOH_1.50     | -2.9 <sup>a</sup>  | -2.0  | -2.5    | -2.5  | -2.1  | -2.6    | -2.6  |
| Dimer Peptide-MeOH_2.00     | -1.3 <sup>a</sup>  | -1.1  | -1.3    | -1.3  | -1.1  | -1.3    | -1.3  |
| Dimer Peptide-MeNH2_0.90    | -6.8 <sup>a</sup>  | -3.7  | -5.6    | -5.2  | -4.0  | -6.3    | -7.5  |
| Dimer Peptide-MeNH2_0.95    | -7.3 <sup>a</sup>  | -4.1  | -5.8    | -5.5  | -4.2  | -6.3    | -7.2  |
| Dimer Peptide-MeNH2_1.00    | -7.5 <sup>a</sup>  | -4.1  | -5.7    | -5.5  | -4.2  | -6.1    | -6.8  |
| Dimer Peptide-MeNH2_1.05    | -7.3 <sup>a</sup>  | -4.0  | -5.5    | -5.4  | -4.0  | -5.8    | -6.4  |
| Dimer Peptide-MeNH2_1.10    | -7.0 <sup>a</sup>  | -3.8  | -5.2    | -5.2  | -3.8  | -5.5    | -5.9  |
| Dimer Peptide-MeNH2_1.25    | -5.6 <sup>a</sup>  | -3.1  | -4.2    | -4.3  | -3.2  | -4.3    | -4.6  |
| Dimer Peptide-MeNH2_1.50    | -3.6 <sup>a</sup>  | -2.1  | -2.8    | -2.9  | -2.2  | -2.9    | -3.1  |
| Dimer Peptide-MeNH2_2.00    | -1.5 <sup>a</sup>  | -1.1  | -1.3    | -1.4  | -1.1  | -1.4    | -1.4  |
| Dimer Peptide-Peptide_0.90  | -8.0 <sup>a</sup>  | -5.4  | -7.6    | -7.8  | -4.2  | -7.0    | -7.1  |
| Dimer Peptide-Peptide_0.95  | -8.5 <sup>a</sup>  | -5.4  | -7.5    | -7.7  | -4.4  | -7.0    | -7.0  |
| Dimer Peptide-Peptide_1.00  | -8.6 <sup>a</sup>  | -5.2  | -7.2    | -7.3  | -4.5  | -6.9    | -6.8  |
| Dimer Peptide-Peptide_1.05  | -8.4 <sup>a</sup>  | -4.9  | -6.8    | -6.8  | -4.4  | -6.6    | -6.5  |
| Dimer Peptide-Peptide_1.10  | -8.1 <sup>a</sup>  | -4.6  | -6.3    | -6.3  | -4.2  | -6.2    | -6.1  |
| Dimer Peptide-Peptide_1.25  | -6.7 <sup>a</sup>  | -3.7  | -5.0    | -5.0  | -3.6  | -5.1    | -5.1  |
| Dimer Peptide-Peptide_1.50  | -4.4 <sup>a</sup>  | -2.6  | -3.4    | -3.4  | -2.6  | -3.5    | -3.5  |
| Dimer Peptide-Peptide_2.00  | -1.8 <sup>a</sup>  | -1.2  | -1.5    | -1.5  | -1.3  | -1.6    | -1.5  |
| Dimer Peptide-Water_0.90    | -4.7 <sup>a</sup>  | -4.0  | -4.8    | -5.0  | -3.7  | -4.7    | -4.7  |
| Dimer Peptide-Water_0.95    | -5.1 <sup>a</sup>  | -3.9  | -4.6    | -4.7  | -3.8  | -4.7    | -4.6  |
| Dimer Peptide-Water_1.00    | -5.1 <sup>a</sup>  | -3.7  | -4.4    | -4.4  | -3.7  | -4.5    | -4.4  |
| Dimer Peptide-Water_1.05    | -5.0 <sup>a</sup>  | -3.5  | -4.1    | -4.1  | -3.6  | -4.3    | -4.2  |
| Dimer Peptide-Water_1.10    | -4.7 <sup>a</sup>  | -3.2  | -3.8    | -3.8  | -3.4  | -4.1    | -4.0  |
| Dimer Peptide-Water_1.25    | -3.8 <sup>a</sup>  | -2.6  | -3.0    | -3.0  | -2.8  | -3.3    | -3.2  |
| Dimer Peptide-Water_1.50    | -2.4 <sup>a</sup>  | -1.8  | -2.1    | -2.0  | -2.0  | -2.3    | -2.2  |
| Dimer Peptide-Water_2.00    | -1.1 <sup>a</sup>  | -1.0  | -1.1    | -1.1  | -1.1  | -1.2    | -1.1  |
| Dimer Uracil-Uracil_BP_0.90 | -15.7 <sup>a</sup> | -14.8 | -17.0   | -17.3 | -13.8 | -16.6   | -17.4 |

... continued on next page ...

Table S77: ... continued from previous page ...

| Species                         | Ref.               | OM2   | OM2-D3T | ODM2  | OM3   | OM3-D3T | ODM3  |
|---------------------------------|--------------------|-------|---------|-------|-------|---------|-------|
| Dimer Uracil-Uracil_BP_0.95     | -16.9 <sup>a</sup> | -14.5 | -16.6   | -16.8 | -13.3 | -15.9   | -16.4 |
| Dimer Uracil-Uracil_BP_1.00     | -17.2 <sup>a</sup> | -13.7 | -15.7   | -15.8 | -12.6 | -15.0   | -15.2 |
| Dimer Uracil-Uracil_BP_1.05     | -16.9 <sup>a</sup> | -12.7 | -14.5   | -14.6 | -11.7 | -14.0   | -14.0 |
| Dimer Uracil-Uracil_BP_1.10     | -16.2 <sup>a</sup> | -11.5 | -13.2   | -13.3 | -10.8 | -12.9   | -12.8 |
| Dimer Uracil-Uracil_BP_1.25     | -13.2 <sup>a</sup> | -8.6  | -10.0   | -10.0 | -8.4  | -10.1   | -9.9  |
| Dimer Uracil-Uracil_BP_1.50     | -8.4 <sup>a</sup>  | -5.4  | -6.4    | -6.3  | -5.6  | -6.7    | -6.6  |
| Dimer Uracil-Uracil_BP_2.00     | -3.3 <sup>a</sup>  | -2.5  | -2.9    | -2.9  | -2.6  | -3.0    | -3.0  |
| Dimer Water-Pyridine_0.90       | -6.4 <sup>a</sup>  | -3.5  | -4.4    | -4.0  | -4.9  | -6.0    | -7.3  |
| Dimer Water-Pyridine_0.95       | -6.8 <sup>a</sup>  | -3.7  | -4.5    | -4.2  | -4.7  | -5.8    | -6.7  |
| Dimer Water-Pyridine_1.00       | -6.8 <sup>a</sup>  | -3.7  | -4.5    | -4.3  | -4.4  | -5.3    | -6.1  |
| Dimer Water-Pyridine_1.05       | -6.6 <sup>a</sup>  | -3.5  | -4.2    | -4.2  | -4.0  | -4.9    | -5.5  |
| Dimer Water-Pyridine_1.10       | -6.3 <sup>a</sup>  | -3.3  | -4.0    | -4.0  | -3.7  | -4.5    | -4.9  |
| Dimer Water-Pyridine_1.25       | -4.9 <sup>a</sup>  | -2.6  | -3.1    | -3.3  | -2.8  | -3.4    | -3.6  |
| Dimer Water-Pyridine_1.50       | -3.0 <sup>a</sup>  | -1.7  | -2.0    | -2.2  | -1.8  | -2.2    | -2.3  |
| Dimer Water-Pyridine_2.00       | -1.2 <sup>a</sup>  | -0.8  | -0.9    | -1.0  | -0.9  | -1.0    | -1.1  |
| Dimer MeOH-Pyridine_0.90        | -6.8 <sup>a</sup>  | -2.7  | -4.0    | -3.5  | -4.3  | -6.0    | -7.3  |
| Dimer MeOH-Pyridine_0.95        | -7.3 <sup>a</sup>  | -3.1  | -4.3    | -3.8  | -4.2  | -5.8    | -6.8  |
| Dimer MeOH-Pyridine_1.00        | -7.4 <sup>a</sup>  | -3.2  | -4.3    | -4.0  | -4.0  | -5.4    | -6.2  |
| Dimer MeOH-Pyridine_1.05        | -7.2 <sup>a</sup>  | -3.1  | -4.1    | -4.0  | -3.7  | -5.0    | -5.6  |
| Dimer MeOH-Pyridine_1.10        | -6.9 <sup>a</sup>  | -2.9  | -3.9    | -3.8  | -3.4  | -4.6    | -5.0  |
| Dimer MeOH-Pyridine_1.25        | -5.5 <sup>a</sup>  | -2.3  | -3.1    | -3.2  | -2.6  | -3.5    | -3.7  |
| Dimer MeOH-Pyridine_1.50        | -3.4 <sup>a</sup>  | -1.5  | -2.0    | -2.2  | -1.7  | -2.2    | -2.3  |
| Dimer MeOH-Pyridine_2.00        | -1.3 <sup>a</sup>  | -0.7  | -0.9    | -1.0  | -0.8  | -1.0    | -1.0  |
| Dimer AcOH-AcOH_0.90            | -17.4 <sup>a</sup> | -14.8 | -16.3   | -17.1 | -13.2 | -15.4   | -14.9 |
| Dimer AcOH-AcOH_0.95            | -18.8 <sup>a</sup> | -14.5 | -16.0   | -16.8 | -12.7 | -14.7   | -14.3 |
| Dimer AcOH-AcOH_1.00            | -19.1 <sup>a</sup> | -13.6 | -15.0   | -15.8 | -11.8 | -13.7   | -13.2 |
| Dimer AcOH-AcOH_1.05            | -18.7 <sup>a</sup> | -12.4 | -13.8   | -14.5 | -10.7 | -12.5   | -12.0 |
| Dimer AcOH-AcOH_1.10            | -17.9 <sup>a</sup> | -11.2 | -12.5   | -13.1 | -9.6  | -11.3   | -10.8 |
| Dimer AcOH-AcOH_1.25            | -14.6 <sup>a</sup> | -7.9  | -9.0    | -9.4  | -7.1  | -8.5    | -8.1  |
| Dimer AcOH-AcOH_1.50            | -9.2 <sup>a</sup>  | -4.7  | -5.5    | -5.7  | -4.6  | -5.5    | -5.3  |
| Dimer AcOH-AcOH_2.00            | -3.6 <sup>a</sup>  | -2.1  | -2.4    | -2.5  | -2.0  | -2.4    | -2.3  |
| Dimer AcNH2-AcNH2_0.90          | -14.9 <sup>a</sup> | -14.0 | -15.7   | -16.1 | -12.7 | -15.0   | -15.6 |
| Dimer AcNH2-AcNH2_0.95          | -16.0 <sup>a</sup> | -13.6 | -15.2   | -15.5 | -12.3 | -14.5   | -14.7 |
| Dimer AcNH2-AcNH2_1.00          | -16.3 <sup>a</sup> | -12.8 | -14.3   | -14.4 | -11.7 | -13.6   | -13.6 |
| Dimer AcNH2-AcNH2_1.05          | -15.9 <sup>a</sup> | -11.8 | -13.2   | -13.2 | -10.9 | -12.7   | -12.6 |
| Dimer AcNH2-AcNH2_1.10          | -15.3 <sup>a</sup> | -10.8 | -12.1   | -12.1 | -10.1 | -11.8   | -11.6 |
| Dimer AcNH2-AcNH2_1.25          | -12.4 <sup>a</sup> | -8.1  | -9.2    | -9.1  | -8.1  | -9.4    | -9.1  |
| Dimer AcNH2-AcNH2_1.50          | -8.0 <sup>a</sup>  | -5.3  | -6.0    | -5.9  | -5.5  | -6.3    | -6.1  |
| Dimer AcNH2-AcNH2_2.00          | -3.0 <sup>a</sup>  | -2.4  | -2.6    | -2.5  | -2.5  | -2.7    | -2.6  |
| Dimer AcOH-Uracil_0.90          | -17.9 <sup>a</sup> | -16.4 | -18.2   | -18.8 | -15.2 | -17.7   | -17.8 |
| Dimer AcOH-Uracil_0.95          | -19.2 <sup>a</sup> | -16.1 | -17.9   | -18.4 | -14.7 | -17.0   | -16.9 |
| Dimer AcOH-Uracil_1.00          | -19.5 <sup>a</sup> | -15.3 | -16.9   | -17.4 | -13.7 | -15.9   | -15.6 |
| Dimer AcOH-Uracil_1.05          | -19.2 <sup>a</sup> | -14.1 | -15.6   | -16.0 | -12.7 | -14.7   | -14.3 |
| Dimer AcOH-Uracil_1.10          | -18.4 <sup>a</sup> | -12.8 | -14.3   | -14.7 | -11.6 | -13.5   | -13.1 |
| Dimer AcOH-Uracil_1.25          | -15.1 <sup>a</sup> | -9.5  | -10.8   | -11.0 | -9.0  | -10.5   | -10.1 |
| Dimer AcOH-Uracil_1.50          | -9.9 <sup>a</sup>  | -6.1  | -7.0    | -7.1  | -6.0  | -7.1    | -6.8  |
| Dimer AcOH-Uracil_2.00          | -4.1 <sup>a</sup>  | -3.0  | -3.3    | -3.4  | -2.9  | -3.3    | -3.2  |
| Dimer AcNH2-Uracil_0.90         | -17.7 <sup>a</sup> | -17.1 | -19.0   | -19.4 | -16.1 | -18.6   | -19.5 |
| Dimer AcNH2-Uracil_0.95         | -18.9 <sup>a</sup> | -16.8 | -18.7   | -18.9 | -15.6 | -18.0   | -18.5 |
| Dimer AcNH2-Uracil_1.00         | -19.2 <sup>a</sup> | -16.0 | -17.7   | -17.9 | -14.8 | -17.1   | -17.2 |
| Dimer AcNH2-Uracil_1.05         | -18.9 <sup>a</sup> | -14.9 | -16.6   | -16.7 | -13.9 | -16.0   | -15.9 |
| Dimer AcNH2-Uracil_1.10         | -18.2 <sup>a</sup> | -13.8 | -15.3   | -15.4 | -13.0 | -14.9   | -14.7 |
| Dimer AcNH2-Uracil_1.25         | -15.2 <sup>a</sup> | -10.7 | -12.0   | -11.9 | -10.5 | -12.0   | -11.7 |
| Dimer AcNH2-Uracil_1.50         | -10.2 <sup>a</sup> | -7.3  | -8.1    | -8.1  | -7.4  | -8.4    | -8.1  |
| Dimer AcNH2-Uracil_2.00         | -4.7 <sup>a</sup>  | -3.8  | -4.2    | -4.2  | -3.9  | -4.3    | -4.1  |
| Dimer Benzene-Benzene_pi-pi_0.  | -0.2 <sup>a</sup>  | 2.3   | -2.3    | -2.9  | 2.6   | -3.3    | -3.4  |
| Dimer Benzene-Benzene_pi-pi_0.  | -2.1 <sup>a</sup>  | 1.7   | -2.3    | -2.9  | 1.7   | -3.3    | -3.5  |
| Dimer Benzene-Benzene_pi-pi_1.  | -2.7 <sup>a</sup>  | 1.3   | -2.1    | -2.6  | 1.2   | -3.0    | -3.2  |
| Dimer Benzene-Benzene_pi-pi_1.  | -2.8 <sup>a</sup>  | 1.1   | -1.8    | -2.2  | 0.9   | -2.5    | -2.8  |
| Dimer Benzene-Benzene_pi-pi_1.  | -2.6 <sup>a</sup>  | 1.0   | -1.5    | -1.8  | 0.7   | -2.1    | -2.3  |
| Dimer Benzene-Benzene_pi-pi_1.  | -1.5 <sup>a</sup>  | 0.6   | -0.8    | -0.9  | 0.5   | -1.1    | -1.2  |
| Dimer Benzene-Benzene_pi-pi_1.  | -0.5 <sup>a</sup>  | 0.3   | -0.2    | -0.2  | 0.2   | -0.3    | -0.3  |
| Dimer Benzene-Benzene_pi-pi_2.  | -0.1 <sup>a</sup>  | 0.1   | 0.0     | 0.0   | 0.1   | -0.0    | -0.0  |
| Dimer Pyridine-Pyridine_pi-pi_. | -1.3 <sup>a</sup>  | 0.4   | -4.3    | -5.0  | 1.1   | -5.0    | -5.0  |
| Dimer Pyridine-Pyridine_pi-pi_. | -3.2 <sup>a</sup>  | -0.0  | -4.1    | -4.8  | 0.3   | -4.9    | -5.0  |

... continued on next page ...

Table S77: ... continued from previous page ...

| Species                        | Ref.              | OM2  | OM2-D3T | ODM2  | OM3  | OM3-D3T | ODM3  |
|--------------------------------|-------------------|------|---------|-------|------|---------|-------|
| Dimer Pyridine-Pyridine_pi-pi_ | -3.8 <sup>a</sup> | -0.1 | -3.7    | -4.3  | -0.1 | -4.4    | -4.6  |
| Dimer Pyridine-Pyridine_pi-pi_ | -3.9 <sup>a</sup> | -0.2 | -3.2    | -3.7  | -0.2 | -3.8    | -4.1  |
| Dimer Pyridine-Pyridine_pi-pi_ | -3.6 <sup>a</sup> | -0.2 | -2.8    | -3.2  | -0.2 | -3.3    | -3.5  |
| Dimer Pyridine-Pyridine_pi-pi_ | -2.4 <sup>a</sup> | -0.2 | -1.7    | -1.9  | -0.2 | -1.9    | -2.1  |
| Dimer Pyridine-Pyridine_pi-pi_ | -1.0 <sup>a</sup> | -0.1 | -0.7    | -0.8  | -0.2 | -0.8    | -0.9  |
| Dimer Pyridine-Pyridine_pi-pi_ | -0.2 <sup>a</sup> | -0.1 | -0.2    | -0.2  | -0.1 | -0.2    | -0.2  |
| Dimer Uracil-Uracil_pi-pi_0.90 | -7.9 <sup>a</sup> | -4.6 | -10.4   | -10.8 | -2.9 | -10.5   | -10.0 |
| Dimer Uracil-Uracil_pi-pi_0.95 | -9.5 <sup>a</sup> | -4.6 | -9.9    | -10.2 | -3.8 | -10.5   | -10.2 |
| Dimer Uracil-Uracil_pi-pi_1.00 | -9.8 <sup>a</sup> | -4.3 | -9.1    | -9.3  | -3.9 | -9.8    | -9.7  |
| Dimer Uracil-Uracil_pi-pi_1.05 | -9.4 <sup>a</sup> | -4.0 | -8.2    | -8.3  | -3.8 | -8.9    | -8.8  |
| Dimer Uracil-Uracil_pi-pi_1.10 | -8.7 <sup>a</sup> | -3.6 | -7.3    | -7.4  | -3.5 | -8.0    | -7.9  |
| Dimer Uracil-Uracil_pi-pi_1.25 | -6.1 <sup>a</sup> | -2.6 | -5.1    | -5.0  | -2.7 | -5.5    | -5.4  |
| Dimer Uracil-Uracil_pi-pi_1.50 | -3.1 <sup>a</sup> | -1.6 | -2.8    | -2.7  | -1.7 | -2.9    | -2.9  |
| Dimer Uracil-Uracil_pi-pi_2.00 | -1.0 <sup>a</sup> | -0.7 | -0.9    | -0.9  | -0.8 | -1.0    | -1.0  |
| Dimer Benzene-Pyridine_pi-pi_0 | -0.7 <sup>a</sup> | 1.3  | -3.4    | -4.0  | 1.8  | -4.2    | -4.2  |
| Dimer Benzene-Pyridine_pi-pi_0 | -2.7 <sup>a</sup> | 0.8  | -3.3    | -3.9  | 0.9  | -4.2    | -4.3  |
| Dimer Benzene-Pyridine_pi-pi_1 | -3.4 <sup>a</sup> | 0.5  | -3.0    | -3.5  | 0.5  | -3.8    | -4.0  |
| Dimer Benzene-Pyridine_pi-pi_1 | -3.4 <sup>a</sup> | 0.4  | -2.6    | -3.0  | 0.3  | -3.3    | -3.5  |
| Dimer Benzene-Pyridine_pi-pi_1 | -3.1 <sup>a</sup> | 0.3  | -2.2    | -2.5  | 0.2  | -2.7    | -2.9  |
| Dimer Benzene-Pyridine_pi-pi_1 | -2.0 <sup>a</sup> | 0.2  | -1.3    | -1.4  | 0.1  | -1.5    | -1.7  |
| Dimer Benzene-Pyridine_pi-pi_1 | -0.7 <sup>a</sup> | 0.1  | -0.5    | -0.5  | 0.0  | -0.5    | -0.6  |
| Dimer Benzene-Pyridine_pi-pi_2 | -0.1 <sup>a</sup> | -0.0 | -0.1    | -0.1  | -0.0 | -0.1    | -0.1  |
| Dimer Benzene-Uracil_pi-pi_0.9 | -3.5 <sup>a</sup> | -1.1 | -6.4    | -7.0  | 0.0  | -6.9    | -6.1  |
| Dimer Benzene-Uracil_pi-pi_0.9 | -5.2 <sup>a</sup> | -1.2 | -6.0    | -6.5  | -0.7 | -6.7    | -6.2  |
| Dimer Benzene-Uracil_pi-pi_1.0 | -5.7 <sup>a</sup> | -1.1 | -5.3    | -5.7  | -0.9 | -6.0    | -5.7  |
| Dimer Benzene-Uracil_pi-pi_1.0 | -5.5 <sup>a</sup> | -1.0 | -4.6    | -5.0  | -0.9 | -5.3    | -5.1  |
| Dimer Benzene-Uracil_pi-pi_1.1 | -5.1 <sup>a</sup> | -0.8 | -4.0    | -4.3  | -0.8 | -4.5    | -4.4  |
| Dimer Benzene-Uracil_pi-pi_1.2 | -3.3 <sup>a</sup> | -0.5 | -2.5    | -2.6  | -0.5 | -2.7    | -2.7  |
| Dimer Benzene-Uracil_pi-pi_1.5 | -1.4 <sup>a</sup> | -0.2 | -1.0    | -1.1  | -0.2 | -1.1    | -1.1  |
| Dimer Benzene-Uracil_pi-pi_2.0 | -0.3 <sup>a</sup> | 0.0  | -0.1    | -0.2  | -0.0 | -0.2    | -0.2  |
| Dimer Pyridine-Uracil_pi-pi_0. | -3.7 <sup>a</sup> | -2.3 | -7.7    | -8.4  | -1.0 | -8.0    | -7.4  |
| Dimer Pyridine-Uracil_pi-pi_0. | -6.2 <sup>a</sup> | -2.6 | -7.3    | -8.0  | -1.9 | -7.9    | -7.7  |
| Dimer Pyridine-Uracil_pi-pi_1. | -6.8 <sup>a</sup> | -2.4 | -6.5    | -7.1  | -2.2 | -7.2    | -7.2  |
| Dimer Pyridine-Uracil_pi-pi_1. | -6.6 <sup>a</sup> | -2.2 | -5.7    | -6.2  | -2.1 | -6.3    | -6.4  |
| Dimer Pyridine-Uracil_pi-pi_1. | -6.0 <sup>a</sup> | -2.0 | -5.0    | -5.4  | -2.0 | -5.5    | -5.5  |
| Dimer Pyridine-Uracil_pi-pi_1. | -3.9 <sup>a</sup> | -1.4 | -3.2    | -3.5  | -1.5 | -3.4    | -3.5  |
| Dimer Pyridine-Uracil_pi-pi_1. | -1.8 <sup>a</sup> | -0.9 | -1.6    | -1.7  | -0.9 | -1.7    | -1.7  |
| Dimer Pyridine-Uracil_pi-pi_2. | -0.5 <sup>a</sup> | -0.4 | -0.5    | -0.5  | -0.4 | -0.5    | -0.5  |
| Dimer Benzene-Ethene_0.90      | -0.3 <sup>a</sup> | 1.6  | -1.1    | -1.4  | 1.6  | -1.8    | -1.8  |
| Dimer Benzene-Ethene_0.95      | -1.1 <sup>a</sup> | 1.3  | -1.0    | -1.4  | 1.1  | -1.7    | -1.8  |
| Dimer Benzene-Ethene_1.00      | -1.4 <sup>a</sup> | 1.1  | -0.9    | -1.2  | 0.9  | -1.5    | -1.6  |
| Dimer Benzene-Ethene_1.05      | -1.4 <sup>a</sup> | 0.9  | -0.7    | -1.0  | 0.7  | -1.2    | -1.4  |
| Dimer Benzene-Ethene_1.10      | -1.3 <sup>a</sup> | 0.8  | -0.6    | -0.8  | 0.6  | -1.0    | -1.1  |
| Dimer Benzene-Ethene_1.25      | -0.7 <sup>a</sup> | 0.6  | -0.2    | -0.3  | 0.4  | -0.4    | -0.5  |
| Dimer Benzene-Ethene_1.50      | -0.2 <sup>a</sup> | 0.3  | 0.0     | -0.0  | 0.2  | -0.1    | -0.1  |
| Dimer Benzene-Ethene_2.00      | 0.0 <sup>a</sup>  | 0.1  | 0.1     | 0.1   | 0.1  | 0.0     | 0.0   |
| Dimer Uracil-Ethene_0.90       | -2.6 <sup>a</sup> | -0.9 | -3.6    | -3.9  | -0.2 | -3.8    | -3.4  |
| Dimer Uracil-Ethene_0.95       | -3.2 <sup>a</sup> | -0.9 | -3.4    | -3.7  | -0.6 | -3.7    | -3.5  |
| Dimer Uracil-Ethene_1.00       | -3.4 <sup>a</sup> | -0.9 | -3.1    | -3.3  | -0.7 | -3.4    | -3.3  |
| Dimer Uracil-Ethene_1.05       | -3.2 <sup>a</sup> | -0.8 | -2.7    | -2.9  | -0.7 | -3.0    | -2.9  |
| Dimer Uracil-Ethene_1.10       | -3.0 <sup>a</sup> | -0.7 | -2.4    | -2.6  | -0.7 | -2.7    | -2.6  |
| Dimer Uracil-Ethene_1.25       | -2.0 <sup>a</sup> | -0.5 | -1.6    | -1.7  | -0.5 | -1.7    | -1.7  |
| Dimer Uracil-Ethene_1.50       | -0.9 <sup>a</sup> | -0.3 | -0.8    | -0.8  | -0.3 | -0.8    | -0.8  |
| Dimer Uracil-Ethene_2.00       | -0.3 <sup>a</sup> | -0.1 | -0.2    | -0.2  | -0.1 | -0.2    | -0.2  |
| Dimer Uracil-Ethyne_0.90       | -2.8 <sup>a</sup> | -2.0 | -4.4    | -4.6  | -1.3 | -4.4    | -3.8  |
| Dimer Uracil-Ethyne_0.95       | -3.6 <sup>a</sup> | -1.9 | -4.0    | -4.2  | -1.5 | -4.3    | -3.8  |
| Dimer Uracil-Ethyne_1.00       | -3.7 <sup>a</sup> | -1.7 | -3.6    | -3.8  | -1.5 | -3.9    | -3.5  |
| Dimer Uracil-Ethyne_1.05       | -3.6 <sup>a</sup> | -1.5 | -3.2    | -3.3  | -1.4 | -3.4    | -3.2  |
| Dimer Uracil-Ethyne_1.10       | -3.3 <sup>a</sup> | -1.3 | -2.8    | -2.9  | -1.3 | -3.0    | -2.8  |
| Dimer Uracil-Ethyne_1.25       | -2.2 <sup>a</sup> | -0.9 | -1.8    | -1.9  | -0.9 | -1.9    | -1.8  |
| Dimer Uracil-Ethyne_1.50       | -1.0 <sup>a</sup> | -0.5 | -0.9    | -0.9  | -0.5 | -0.9    | -0.9  |
| Dimer Uracil-Ethyne_2.00       | -0.3 <sup>a</sup> | -0.2 | -0.3    | -0.3  | -0.2 | -0.3    | -0.2  |
| Dimer Pyridine-Ethene_0.90     | -0.9 <sup>a</sup> | 0.8  | -1.8    | -2.2  | 1.0  | -2.4    | -2.3  |
| Dimer Pyridine-Ethene_0.95     | -1.6 <sup>a</sup> | 0.6  | -1.7    | -2.0  | 0.6  | -2.3    | -2.3  |
| Dimer Pyridine-Ethene_1.00     | -1.9 <sup>a</sup> | 0.5  | -1.5    | -1.8  | 0.4  | -2.0    | -2.1  |

... continued on next page ...

Table S77: ... continued from previous page ...

| Species                         | Ref.              | OM2  | OM2-D3T | ODM2 | OM3  | OM3-D3T | ODM3 |
|---------------------------------|-------------------|------|---------|------|------|---------|------|
| Dimer Pyridine-Ethene_1.05      | -1.8 <sup>a</sup> | 0.5  | -1.2    | -1.5 | 0.3  | -1.7    | -1.8 |
| Dimer Pyridine-Ethene_1.10      | -1.7 <sup>a</sup> | 0.4  | -1.0    | -1.2 | 0.2  | -1.5    | -1.6 |
| Dimer Pyridine-Ethene_1.25      | -1.0 <sup>a</sup> | 0.3  | -0.6    | -0.7 | 0.2  | -0.8    | -0.9 |
| Dimer Pyridine-Ethene_1.50      | -0.4 <sup>a</sup> | 0.2  | -0.2    | -0.2 | 0.1  | -0.3    | -0.3 |
| Dimer Pyridine-Ethene_2.00      | -0.0 <sup>a</sup> | 0.1  | 0.0     | -0.0 | 0.0  | -0.0    | -0.0 |
| Dimer Pentane-Pentane_0.90      | -2.9 <sup>a</sup> | 0.7  | -3.8    | -3.0 | 3.5  | -2.3    | -1.2 |
| Dimer Pentane-Pentane_0.95      | -3.6 <sup>a</sup> | 0.0  | -4.1    | -3.7 | 1.9  | -3.2    | -2.6 |
| Dimer Pentane-Pentane_1.00      | -3.8 <sup>a</sup> | -0.2 | -3.8    | -3.7 | 1.0  | -3.4    | -3.0 |
| Dimer Pentane-Pentane_1.05      | -3.6 <sup>a</sup> | -0.2 | -3.4    | -3.4 | 0.6  | -3.2    | -3.1 |
| Dimer Pentane-Pentane_1.10      | -3.3 <sup>a</sup> | -0.2 | -3.0    | -3.0 | 0.3  | -3.0    | -2.9 |
| Dimer Pentane-Pentane_1.25      | -2.2 <sup>a</sup> | -0.0 | -1.9    | -2.0 | 0.0  | -2.0    | -2.1 |
| Dimer Pentane-Pentane_1.50      | -1.1 <sup>a</sup> | -0.0 | -0.9    | -0.9 | 0.0  | -1.0    | -1.0 |
| Dimer Pentane-Pentane_2.00      | -0.3 <sup>a</sup> | 0.0  | -0.3    | -0.3 | 0.0  | -0.3    | -0.3 |
| Dimer Neopentane-Pentane_0.90   | -1.9 <sup>a</sup> | 0.1  | -3.3    | -2.7 | 2.1  | -2.1    | -1.3 |
| Dimer Neopentane-Pentane_0.95   | -2.5 <sup>a</sup> | -0.4 | -3.3    | -3.0 | 1.0  | -2.6    | -2.2 |
| Dimer Neopentane-Pentane_1.00   | -2.6 <sup>a</sup> | -0.4 | -3.0    | -2.9 | 0.4  | -2.6    | -2.4 |
| Dimer Neopentane-Pentane_1.05   | -2.5 <sup>a</sup> | -0.4 | -2.6    | -2.6 | 0.2  | -2.4    | -2.3 |
| Dimer Neopentane-Pentane_1.10   | -2.3 <sup>a</sup> | -0.3 | -2.2    | -2.2 | 0.1  | -2.1    | -2.1 |
| Dimer Neopentane-Pentane_1.25   | -1.5 <sup>a</sup> | -0.1 | -1.3    | -1.4 | -0.0 | -1.4    | -1.4 |
| Dimer Neopentane-Pentane_1.50   | -0.7 <sup>a</sup> | -0.0 | -0.6    | -0.7 | -0.0 | -0.7    | -0.7 |
| Dimer Neopentane-Pentane_2.00   | -0.2 <sup>a</sup> | -0.0 | -0.2    | -0.2 | -0.0 | -0.2    | -0.2 |
| Dimer Neopentane-Neopentane_0.  | -1.5 <sup>a</sup> | -0.8 | -3.3    | -3.0 | 0.4  | -2.6    | -2.2 |
| Dimer Neopentane-Neopentane_0.  | -1.7 <sup>a</sup> | -0.7 | -2.8    | -2.7 | 0.2  | -2.4    | -2.2 |
| Dimer Neopentane-Neopentane_1.  | -1.8 <sup>a</sup> | -0.5 | -2.4    | -2.3 | 0.0  | -2.1    | -2.0 |
| Dimer Neopentane-Neopentane_1.  | -1.7 <sup>a</sup> | -0.3 | -2.0    | -2.0 | -0.0 | -1.8    | -1.8 |
| Dimer Neopentane-Neopentane_1.  | -1.5 <sup>a</sup> | -0.2 | -1.6    | -1.6 | -0.0 | -1.6    | -1.6 |
| Dimer Neopentane-Neopentane_1.  | -1.0 <sup>a</sup> | -0.1 | -1.0    | -1.0 | -0.0 | -1.0    | -1.0 |
| Dimer Neopentane-Neopentane_1.  | -0.5 <sup>a</sup> | -0.0 | -0.5    | -0.5 | -0.0 | -0.5    | -0.5 |
| Dimer Neopentane-Neopentane_2.  | -0.1 <sup>a</sup> | -0.0 | -0.1    | -0.1 | -0.0 | -0.1    | -0.1 |
| Dimer Cyclopentane-Neopentane_. | -1.6 <sup>a</sup> | -0.2 | -3.5    | -2.8 | 1.8  | -2.3    | -1.5 |
| Dimer Cyclopentane-Neopentane_. | -2.2 <sup>a</sup> | -0.6 | -3.5    | -3.1 | 0.8  | -2.7    | -2.3 |
| Dimer Cyclopentane-Neopentane_. | -2.4 <sup>a</sup> | -0.6 | -3.1    | -3.0 | 0.3  | -2.6    | -2.4 |
| Dimer Cyclopentane-Neopentane_. | -2.3 <sup>a</sup> | -0.5 | -2.7    | -2.6 | 0.1  | -2.4    | -2.3 |
| Dimer Cyclopentane-Neopentane_. | -2.1 <sup>a</sup> | -0.4 | -2.2    | -2.3 | 0.0  | -2.1    | -2.1 |
| Dimer Cyclopentane-Neopentane_. | -1.5 <sup>a</sup> | -0.1 | -1.4    | -1.4 | -0.0 | -1.4    | -1.4 |
| Dimer Cyclopentane-Neopentane_. | -0.7 <sup>a</sup> | -0.0 | -0.6    | -0.7 | -0.0 | -0.7    | -0.7 |
| Dimer Cyclopentane-Neopentane_. | -0.2 <sup>a</sup> | -0.0 | -0.2    | -0.2 | -0.0 | -0.2    | -0.2 |
| Dimer Cyclopentane-Cyclopentan  | -2.2 <sup>a</sup> | 0.2  | -3.4    | -2.7 | 2.4  | -2.1    | -1.3 |
| Dimer Cyclopentane-Cyclopentan  | -2.8 <sup>a</sup> | -0.3 | -3.5    | -3.1 | 1.3  | -2.6    | -2.1 |
| Dimer Cyclopentane-Cyclopentan  | -3.0 <sup>a</sup> | -0.4 | -3.2    | -3.0 | 0.7  | -2.7    | -2.4 |
| Dimer Cyclopentane-Cyclopentan  | -2.9 <sup>a</sup> | -0.3 | -2.8    | -2.7 | 0.4  | -2.5    | -2.4 |
| Dimer Cyclopentane-Cyclopentan  | -2.6 <sup>a</sup> | -0.2 | -2.3    | -2.4 | 0.2  | -2.3    | -2.2 |
| Dimer Cyclopentane-Cyclopentan  | -1.7 <sup>a</sup> | -0.0 | -1.4    | -1.5 | 0.0  | -1.5    | -1.5 |
| Dimer Cyclopentane-Cyclopentan  | -0.8 <sup>a</sup> | -0.0 | -0.7    | -0.7 | 0.0  | -0.7    | -0.7 |
| Dimer Cyclopentane-Cyclopentan  | -0.2 <sup>a</sup> | 0.0  | -0.2    | -0.2 | 0.0  | -0.2    | -0.2 |
| Dimer Benzene-Cyclopentane_0.9  | -2.2 <sup>a</sup> | 1.3  | -2.8    | -2.8 | 2.7  | -2.5    | -2.1 |
| Dimer Benzene-Cyclopentane_0.9  | -3.2 <sup>a</sup> | 0.6  | -3.0    | -3.1 | 1.5  | -3.0    | -2.8 |
| Dimer Benzene-Cyclopentane_1.0  | -3.6 <sup>a</sup> | 0.3  | -2.9    | -3.0 | 0.9  | -3.0    | -3.0 |
| Dimer Benzene-Cyclopentane_1.0  | -3.5 <sup>a</sup> | 0.2  | -2.5    | -2.7 | 0.5  | -2.8    | -2.8 |
| Dimer Benzene-Cyclopentane_1.1  | -3.2 <sup>a</sup> | 0.1  | -2.2    | -2.4 | 0.3  | -2.4    | -2.5 |
| Dimer Benzene-Cyclopentane_1.2  | -2.1 <sup>a</sup> | 0.1  | -1.4    | -1.5 | 0.1  | -1.5    | -1.6 |
| Dimer Benzene-Cyclopentane_1.5  | -0.9 <sup>a</sup> | 0.0  | -0.6    | -0.6 | 0.0  | -0.6    | -0.7 |
| Dimer Benzene-Cyclopentane_2.0  | -0.2 <sup>a</sup> | 0.0  | -0.1    | -0.1 | 0.0  | -0.1    | -0.1 |
| Dimer Benzene-Neopentane_0.90   | -1.9 <sup>a</sup> | 0.4  | -3.0    | -2.9 | 1.6  | -2.6    | -2.4 |
| Dimer Benzene-Neopentane_0.95   | -2.7 <sup>a</sup> | -0.0 | -3.0    | -3.0 | 0.7  | -2.9    | -2.8 |
| Dimer Benzene-Neopentane_1.00   | -2.9 <sup>a</sup> | -0.1 | -2.7    | -2.8 | 0.3  | -2.7    | -2.7 |
| Dimer Benzene-Neopentane_1.05   | -2.8 <sup>a</sup> | -0.2 | -2.4    | -2.5 | 0.1  | -2.5    | -2.5 |
| Dimer Benzene-Neopentane_1.10   | -2.6 <sup>a</sup> | -0.2 | -2.0    | -2.1 | -0.0 | -2.1    | -2.2 |
| Dimer Benzene-Neopentane_1.25   | -1.7 <sup>a</sup> | -0.1 | -1.3    | -1.3 | -0.1 | -1.3    | -1.4 |
| Dimer Benzene-Neopentane_1.50   | -0.8 <sup>a</sup> | -0.1 | -0.6    | -0.6 | -0.0 | -0.6    | -0.6 |
| Dimer Benzene-Neopentane_2.00   | -0.2 <sup>a</sup> | -0.0 | -0.1    | -0.1 | -0.0 | -0.1    | -0.1 |
| Dimer Uracil-Pentane_0.90       | -3.8 <sup>a</sup> | 0.2  | -4.7    | -4.8 | 1.6  | -4.7    | -3.8 |
| Dimer Uracil-Pentane_0.95       | -4.7 <sup>a</sup> | -0.4 | -4.8    | -5.0 | 0.4  | -5.0    | -4.6 |
| Dimer Uracil-Pentane_1.00       | -4.8 <sup>a</sup> | -0.6 | -4.5    | -4.7 | -0.1 | -4.9    | -4.7 |
| Dimer Uracil-Pentane_1.05       | -4.6 <sup>a</sup> | -0.6 | -4.0    | -4.3 | -0.4 | -4.5    | -4.4 |

... continued on next page ...

Table S77: ... continued from previous page ...

| Species                        | Ref.              | OM2  | OM2-D3T | ODM2 | OM3  | OM3-D3T | ODM3 |
|--------------------------------|-------------------|------|---------|------|------|---------|------|
| Dimer Uracil-Pentane_1.10      | -4.1 <sup>a</sup> | -0.5 | -3.5    | -3.7 | -0.4 | -3.9    | -3.8 |
| Dimer Uracil-Pentane_1.25      | -2.4 <sup>a</sup> | -0.3 | -2.1    | -2.2 | -0.3 | -2.2    | -2.3 |
| Dimer Uracil-Pentane_1.50      | -1.0 <sup>a</sup> | -0.1 | -0.9    | -0.9 | -0.1 | -0.9    | -0.9 |
| Dimer Uracil-Pentane_2.00      | -0.2 <sup>a</sup> | -0.0 | -0.2    | -0.2 | -0.0 | -0.2    | -0.2 |
| Dimer Uracil-Cyclopentane_0.90 | -3.0 <sup>a</sup> | 0.5  | -3.8    | -3.9 | 1.8  | -3.8    | -3.1 |
| Dimer Uracil-Cyclopentane_0.95 | -4.0 <sup>a</sup> | -0.1 | -3.9    | -4.1 | 0.6  | -4.2    | -3.9 |
| Dimer Uracil-Cyclopentane_1.00 | -4.1 <sup>a</sup> | -0.3 | -3.7    | -3.9 | 0.1  | -4.0    | -3.9 |
| Dimer Uracil-Cyclopentane_1.05 | -3.9 <sup>a</sup> | -0.3 | -3.3    | -3.5 | -0.1 | -3.7    | -3.6 |
| Dimer Uracil-Cyclopentane_1.10 | -3.5 <sup>a</sup> | -0.3 | -2.9    | -3.1 | -0.2 | -3.2    | -3.2 |
| Dimer Uracil-Cyclopentane_1.25 | -2.3 <sup>a</sup> | -0.2 | -1.9    | -2.0 | -0.2 | -2.0    | -2.1 |
| Dimer Uracil-Cyclopentane_1.50 | -1.0 <sup>a</sup> | -0.1 | -0.9    | -0.9 | -0.1 | -0.9    | -0.9 |
| Dimer Uracil-Cyclopentane_2.00 | -0.2 <sup>a</sup> | -0.0 | -0.2    | -0.2 | -0.0 | -0.2    | -0.2 |
| Dimer Uracil-Neopentane_0.90   | -2.9 <sup>a</sup> | 0.1  | -3.6    | -3.6 | 1.2  | -3.4    | -2.9 |
| Dimer Uracil-Neopentane_0.95   | -3.6 <sup>a</sup> | -0.3 | -3.5    | -3.7 | 0.3  | -3.6    | -3.4 |
| Dimer Uracil-Neopentane_1.00   | -3.7 <sup>a</sup> | -0.4 | -3.2    | -3.4 | -0.1 | -3.5    | -3.3 |
| Dimer Uracil-Neopentane_1.05   | -3.5 <sup>a</sup> | -0.4 | -2.9    | -3.0 | -0.2 | -3.1    | -3.1 |
| Dimer Uracil-Neopentane_1.10   | -3.1 <sup>a</sup> | -0.4 | -2.5    | -2.6 | -0.3 | -2.7    | -2.7 |
| Dimer Uracil-Neopentane_1.25   | -2.0 <sup>a</sup> | -0.2 | -1.6    | -1.7 | -0.2 | -1.7    | -1.7 |
| Dimer Uracil-Neopentane_1.50   | -0.9 <sup>a</sup> | -0.1 | -0.7    | -0.7 | -0.1 | -0.8    | -0.8 |
| Dimer Uracil-Neopentane_2.00   | -0.2 <sup>a</sup> | -0.0 | -0.2    | -0.2 | -0.0 | -0.2    | -0.2 |
| Dimer Ethene-Pentane_0.90      | -1.7 <sup>a</sup> | 0.1  | -2.1    | -1.8 | 1.5  | -1.5    | -0.9 |
| Dimer Ethene-Pentane_0.95      | -2.0 <sup>a</sup> | -0.2 | -2.2    | -2.0 | 0.7  | -1.8    | -1.5 |
| Dimer Ethene-Pentane_1.00      | -2.0 <sup>a</sup> | -0.2 | -2.0    | -2.0 | 0.3  | -1.8    | -1.7 |
| Dimer Ethene-Pentane_1.05      | -1.9 <sup>a</sup> | -0.2 | -1.8    | -1.8 | 0.1  | -1.7    | -1.7 |
| Dimer Ethene-Pentane_1.10      | -1.7 <sup>a</sup> | -0.2 | -1.6    | -1.6 | 0.0  | -1.6    | -1.5 |
| Dimer Ethene-Pentane_1.25      | -1.1 <sup>a</sup> | -0.1 | -1.0    | -1.0 | -0.0 | -1.0    | -1.1 |
| Dimer Ethene-Pentane_1.50      | -0.5 <sup>a</sup> | -0.0 | -0.5    | -0.5 | -0.0 | -0.5    | -0.5 |
| Dimer Ethene-Pentane_2.00      | -0.1 <sup>a</sup> | -0.0 | -0.1    | -0.1 | -0.0 | -0.1    | -0.1 |
| Dimer Ethyne-Pentane_0.90      | -1.1 <sup>a</sup> | 0.3  | -1.7    | -1.7 | 1.0  | -1.6    | -1.4 |
| Dimer Ethyne-Pentane_0.95      | -1.6 <sup>a</sup> | 0.1  | -1.6    | -1.7 | 0.5  | -1.7    | -1.6 |
| Dimer Ethyne-Pentane_1.00      | -1.7 <sup>a</sup> | 0.1  | -1.5    | -1.6 | 0.3  | -1.6    | -1.6 |
| Dimer Ethyne-Pentane_1.05      | -1.7 <sup>a</sup> | 0.1  | -1.3    | -1.4 | 0.2  | -1.4    | -1.4 |
| Dimer Ethyne-Pentane_1.10      | -1.5 <sup>a</sup> | 0.0  | -1.1    | -1.2 | 0.1  | -1.2    | -1.2 |
| Dimer Ethyne-Pentane_1.25      | -1.0 <sup>a</sup> | 0.0  | -0.7    | -0.7 | 0.1  | -0.7    | -0.7 |
| Dimer Ethyne-Pentane_1.50      | -0.4 <sup>a</sup> | 0.0  | -0.3    | -0.3 | 0.0  | -0.3    | -0.3 |
| Dimer Ethyne-Pentane_2.00      | -0.1 <sup>a</sup> | 0.0  | -0.1    | -0.1 | 0.0  | -0.1    | -0.1 |
| Dimer Peptide-Pentane_0.90     | -3.8 <sup>a</sup> | 0.2  | -3.8    | -3.6 | 1.9  | -3.2    | -2.4 |
| Dimer Peptide-Pentane_0.95     | -4.2 <sup>a</sup> | -0.3 | -3.8    | -3.8 | 0.9  | -3.6    | -3.1 |
| Dimer Peptide-Pentane_1.00     | -4.2 <sup>a</sup> | -0.4 | -3.7    | -3.7 | 0.4  | -3.6    | -3.3 |
| Dimer Peptide-Pentane_1.05     | -4.0 <sup>a</sup> | -0.4 | -3.3    | -3.5 | 0.1  | -3.4    | -3.3 |
| Dimer Peptide-Pentane_1.10     | -3.7 <sup>a</sup> | -0.4 | -3.0    | -3.1 | -0.0 | -3.1    | -3.1 |
| Dimer Peptide-Pentane_1.25     | -2.6 <sup>a</sup> | -0.3 | -2.1    | -2.2 | -0.1 | -2.2    | -2.2 |
| Dimer Peptide-Pentane_1.50     | -1.2 <sup>a</sup> | -0.1 | -1.0    | -1.0 | -0.1 | -1.0    | -1.0 |
| Dimer Peptide-Pentane_2.00     | -0.3 <sup>a</sup> | -0.0 | -0.2    | -0.2 | -0.0 | -0.2    | -0.2 |
| Dimer Benzene-Benzene_TS_0.90  | -1.6 <sup>a</sup> | 0.2  | -2.7    | -2.5 | 1.6  | -2.0    | -1.6 |
| Dimer Benzene-Benzene_TS_0.95  | -2.6 <sup>a</sup> | -0.4 | -2.9    | -2.8 | 0.6  | -2.5    | -2.3 |
| Dimer Benzene-Benzene_TS_1.00  | -2.9 <sup>a</sup> | -0.6 | -2.8    | -2.8 | 0.1  | -2.6    | -2.5 |
| Dimer Benzene-Benzene_TS_1.05  | -2.8 <sup>a</sup> | -0.6 | -2.5    | -2.5 | -0.1 | -2.5    | -2.4 |
| Dimer Benzene-Benzene_TS_1.10  | -2.6 <sup>a</sup> | -0.6 | -2.3    | -2.3 | -0.2 | -2.2    | -2.2 |
| Dimer Benzene-Benzene_TS_1.25  | -1.8 <sup>a</sup> | -0.4 | -1.5    | -1.5 | -0.3 | -1.5    | -1.5 |
| Dimer Benzene-Benzene_TS_1.50  | -0.8 <sup>a</sup> | -0.3 | -0.8    | -0.7 | -0.2 | -0.7    | -0.7 |
| Dimer Benzene-Benzene_TS_2.00  | -0.2 <sup>a</sup> | -0.1 | -0.2    | -0.2 | -0.1 | -0.2    | -0.2 |
| Dimer Pyridine-Pyridine_TS_0.9 | -2.5 <sup>a</sup> | -0.6 | -3.3    | -3.2 | 0.7  | -2.8    | -2.5 |
| Dimer Pyridine-Pyridine_TS_0.9 | -3.3 <sup>a</sup> | -1.0 | -3.4    | -3.5 | -0.1 | -3.1    | -3.0 |
| Dimer Pyridine-Pyridine_TS_1.0 | -3.5 <sup>a</sup> | -1.2 | -3.3    | -3.4 | -0.5 | -3.1    | -3.1 |
| Dimer Pyridine-Pyridine_TS_1.0 | -3.5 <sup>a</sup> | -1.1 | -3.1    | -3.2 | -0.6 | -3.0    | -3.0 |
| Dimer Pyridine-Pyridine_TS_1.1 | -3.2 <sup>a</sup> | -1.1 | -2.8    | -2.9 | -0.7 | -2.7    | -2.8 |
| Dimer Pyridine-Pyridine_TS_1.2 | -2.3 <sup>a</sup> | -0.8 | -2.0    | -2.1 | -0.6 | -1.9    | -2.0 |
| Dimer Pyridine-Pyridine_TS_1.5 | -1.2 <sup>a</sup> | -0.5 | -1.1    | -1.1 | -0.4 | -1.0    | -1.0 |
| Dimer Pyridine-Pyridine_TS_2.0 | -0.4 <sup>a</sup> | -0.2 | -0.4    | -0.4 | -0.2 | -0.3    | -0.3 |
| Dimer Benzene-Pyridine_TS_0.90 | -2.1 <sup>a</sup> | -0.3 | -3.2    | -3.0 | 1.3  | -2.4    | -2.0 |
| Dimer Benzene-Pyridine_TS_0.95 | -3.0 <sup>a</sup> | -0.9 | -3.4    | -3.4 | 0.3  | -2.9    | -2.7 |
| Dimer Benzene-Pyridine_TS_1.00 | -3.3 <sup>a</sup> | -1.0 | -3.3    | -3.3 | -0.2 | -3.0    | -2.9 |
| Dimer Benzene-Pyridine_TS_1.05 | -3.3 <sup>a</sup> | -1.0 | -3.0    | -3.0 | -0.5 | -2.8    | -2.8 |
| Dimer Benzene-Pyridine_TS_1.10 | -3.0 <sup>a</sup> | -1.0 | -2.7    | -2.7 | -0.6 | -2.6    | -2.6 |

... continued on next page ...

Table S77: ... continued from previous page ...

| Species                        | Ref.              | OM2  | OM2-D3T | ODM2 | OM3  | OM3-D3T | ODM3 |
|--------------------------------|-------------------|------|---------|------|------|---------|------|
| Dimer Benzene-Pyridine_TS_1.25 | -2.1 <sup>a</sup> | -0.8 | -1.8    | -1.9 | -0.5 | -1.8    | -1.8 |
| Dimer Benzene-Pyridine_TS_1.50 | -1.0 <sup>a</sup> | -0.5 | -1.0    | -1.0 | -0.4 | -0.9    | -0.9 |
| Dimer Benzene-Pyridine_TS_2.00 | -0.3 <sup>a</sup> | -0.2 | -0.3    | -0.3 | -0.2 | -0.3    | -0.3 |
| Dimer Benzene-Ethyne_CH-pi_0.9 | -1.9 <sup>a</sup> | -1.5 | -3.2    | -2.9 | 0.4  | -1.9    | -1.3 |
| Dimer Benzene-Ethyne_CH-pi_0.9 | -2.6 <sup>a</sup> | -1.8 | -3.3    | -3.1 | -0.4 | -2.4    | -2.0 |
| Dimer Benzene-Ethyne_CH-pi_1.0 | -2.9 <sup>a</sup> | -1.8 | -3.2    | -3.0 | -0.7 | -2.5    | -2.2 |
| Dimer Benzene-Ethyne_CH-pi_1.0 | -2.8 <sup>a</sup> | -1.6 | -2.9    | -2.7 | -0.9 | -2.4    | -2.2 |
| Dimer Benzene-Ethyne_CH-pi_1.1 | -2.6 <sup>a</sup> | -1.5 | -2.5    | -2.4 | -0.9 | -2.2    | -2.1 |
| Dimer Benzene-Ethyne_CH-pi_1.2 | -1.8 <sup>a</sup> | -1.1 | -1.8    | -1.7 | -0.7 | -1.5    | -1.5 |
| Dimer Benzene-Ethyne_CH-pi_1.5 | -0.9 <sup>a</sup> | -0.6 | -1.0    | -0.9 | -0.5 | -0.8    | -0.8 |
| Dimer Benzene-Ethyne_CH-pi_2.0 | -0.3 <sup>a</sup> | -0.2 | -0.3    | -0.3 | -0.2 | -0.3    | -0.2 |
| Dimer Ethyne-Ethyne_TS_0.90    | -1.2 <sup>a</sup> | -1.6 | -2.3    | -2.1 | -0.8 | -1.6    | -1.3 |
| Dimer Ethyne-Ethyne_TS_0.95    | -1.5 <sup>a</sup> | -1.4 | -1.9    | -1.8 | -0.7 | -1.5    | -1.3 |
| Dimer Ethyne-Ethyne_TS_1.00    | -1.5 <sup>a</sup> | -1.1 | -1.7    | -1.6 | -0.7 | -1.3    | -1.2 |
| Dimer Ethyne-Ethyne_TS_1.05    | -1.5 <sup>a</sup> | -1.0 | -1.4    | -1.3 | -0.6 | -1.2    | -1.1 |
| Dimer Ethyne-Ethyne_TS_1.10    | -1.3 <sup>a</sup> | -0.8 | -1.2    | -1.2 | -0.5 | -1.0    | -1.0 |
| Dimer Ethyne-Ethyne_TS_1.25    | -0.9 <sup>a</sup> | -0.5 | -0.8    | -0.8 | -0.4 | -0.7    | -0.7 |
| Dimer Ethyne-Ethyne_TS_1.50    | -0.5 <sup>a</sup> | -0.3 | -0.4    | -0.4 | -0.2 | -0.4    | -0.3 |
| Dimer Ethyne-Ethyne_TS_2.00    | -0.1 <sup>a</sup> | -0.1 | -0.1    | -0.1 | -0.1 | -0.1    | -0.1 |
| Dimer Benzene-AcOH_OH-pi_0.90  | -4.0 <sup>a</sup> | -2.8 | -5.0    | -5.0 | -1.1 | -4.0    | -3.6 |
| Dimer Benzene-AcOH_OH-pi_0.95  | -4.6 <sup>a</sup> | -2.8 | -4.8    | -4.8 | -1.5 | -4.1    | -3.8 |
| Dimer Benzene-AcOH_OH-pi_1.00  | -4.7 <sup>a</sup> | -2.6 | -4.5    | -4.4 | -1.7 | -4.0    | -3.7 |
| Dimer Benzene-AcOH_OH-pi_1.05  | -4.5 <sup>a</sup> | -2.4 | -4.0    | -3.9 | -1.6 | -3.7    | -3.5 |
| Dimer Benzene-AcOH_OH-pi_1.10  | -4.2 <sup>a</sup> | -2.1 | -3.6    | -3.5 | -1.6 | -3.4    | -3.2 |
| Dimer Benzene-AcOH_OH-pi_1.25  | -3.1 <sup>a</sup> | -1.5 | -2.5    | -2.5 | -1.2 | -2.4    | -2.3 |
| Dimer Benzene-AcOH_OH-pi_1.50  | -1.7 <sup>a</sup> | -0.9 | -1.4    | -1.4 | -0.8 | -1.4    | -1.3 |
| Dimer Benzene-AcOH_OH-pi_2.00  | -0.6 <sup>a</sup> | -0.3 | -0.5    | -0.5 | -0.3 | -0.5    | -0.4 |
| Dimer Benzene-AcNH2_NH-pi_0.90 | -3.8 <sup>a</sup> | -3.2 | -5.3    | -5.1 | -1.8 | -4.4    | -3.9 |
| Dimer Benzene-AcNH2_NH-pi_0.95 | -4.3 <sup>a</sup> | -3.2 | -5.0    | -4.9 | -2.0 | -4.4    | -4.0 |
| Dimer Benzene-AcNH2_NH-pi_1.00 | -4.4 <sup>a</sup> | -3.0 | -4.7    | -4.5 | -2.1 | -4.2    | -3.9 |
| Dimer Benzene-AcNH2_NH-pi_1.05 | -4.2 <sup>a</sup> | -2.7 | -4.2    | -4.1 | -2.0 | -3.9    | -3.7 |
| Dimer Benzene-AcNH2_NH-pi_1.10 | -4.0 <sup>a</sup> | -2.4 | -3.8    | -3.7 | -1.9 | -3.6    | -3.4 |
| Dimer Benzene-AcNH2_NH-pi_1.25 | -3.0 <sup>a</sup> | -1.7 | -2.7    | -2.6 | -1.5 | -2.6    | -2.5 |
| Dimer Benzene-AcNH2_NH-pi_1.50 | -1.6 <sup>a</sup> | -1.0 | -1.5    | -1.5 | -0.9 | -1.4    | -1.4 |
| Dimer Benzene-AcNH2_NH-pi_2.00 | -0.5 <sup>a</sup> | -0.4 | -0.5    | -0.5 | -0.3 | -0.4    | -0.4 |
| Dimer Benzene-Water_OH-pi_0.90 | -2.8 <sup>a</sup> | -2.6 | -4.0    | -3.9 | -1.5 | -3.4    | -3.0 |
| Dimer Benzene-Water_OH-pi_0.95 | -3.2 <sup>a</sup> | -2.5 | -3.8    | -3.7 | -1.7 | -3.4    | -3.1 |
| Dimer Benzene-Water_OH-pi_1.00 | -3.3 <sup>a</sup> | -2.3 | -3.5    | -3.4 | -1.7 | -3.2    | -3.0 |
| Dimer Benzene-Water_OH-pi_1.05 | -3.1 <sup>a</sup> | -2.1 | -3.1    | -3.1 | -1.7 | -3.0    | -2.8 |
| Dimer Benzene-Water_OH-pi_1.10 | -2.9 <sup>a</sup> | -1.9 | -2.8    | -2.7 | -1.6 | -2.7    | -2.6 |
| Dimer Benzene-Water_OH-pi_1.25 | -2.1 <sup>a</sup> | -1.4 | -2.0    | -2.0 | -1.3 | -2.0    | -1.9 |
| Dimer Benzene-Water_OH-pi_1.50 | -1.2 <sup>a</sup> | -0.9 | -1.2    | -1.2 | -0.8 | -1.2    | -1.1 |
| Dimer Benzene-Water_OH-pi_2.00 | -0.4 <sup>a</sup> | -0.4 | -0.5    | -0.5 | -0.4 | -0.5    | -0.4 |
| Dimer Benzene-MeOH_OH-pi_0.90  | -3.5 <sup>a</sup> | -1.7 | -4.0    | -4.0 | -0.3 | -3.4    | -3.1 |
| Dimer Benzene-MeOH_OH-pi_0.95  | -4.0 <sup>a</sup> | -1.8 | -4.0    | -4.0 | -0.8 | -3.6    | -3.3 |
| Dimer Benzene-MeOH_OH-pi_1.00  | -4.2 <sup>a</sup> | -1.8 | -3.7    | -3.7 | -1.1 | -3.5    | -3.3 |
| Dimer Benzene-MeOH_OH-pi_1.05  | -4.1 <sup>a</sup> | -1.6 | -3.4    | -3.4 | -1.2 | -3.3    | -3.2 |
| Dimer Benzene-MeOH_OH-pi_1.10  | -3.8 <sup>a</sup> | -1.5 | -3.1    | -3.0 | -1.2 | -3.1    | -3.0 |
| Dimer Benzene-MeOH_OH-pi_1.25  | -2.8 <sup>a</sup> | -1.1 | -2.2    | -2.2 | -1.0 | -2.2    | -2.2 |
| Dimer Benzene-MeOH_OH-pi_1.50  | -1.5 <sup>a</sup> | -0.7 | -1.3    | -1.2 | -0.7 | -1.3    | -1.2 |
| Dimer Benzene-MeOH_OH-pi_2.00  | -0.5 <sup>a</sup> | -0.3 | -0.5    | -0.4 | -0.3 | -0.4    | -0.4 |
| Dimer Benzene-MeNH2_NH-pi_0.90 | -2.5 <sup>a</sup> | -0.4 | -3.0    | -3.1 | 0.8  | -2.5    | -2.3 |
| Dimer Benzene-MeNH2_NH-pi_0.95 | -3.1 <sup>a</sup> | -0.7 | -3.0    | -3.2 | 0.1  | -2.8    | -2.7 |
| Dimer Benzene-MeNH2_NH-pi_1.00 | -3.2 <sup>a</sup> | -0.8 | -2.9    | -3.0 | -0.3 | -2.8    | -2.8 |
| Dimer Benzene-MeNH2_NH-pi_1.05 | -3.1 <sup>a</sup> | -0.8 | -2.6    | -2.7 | -0.5 | -2.6    | -2.6 |
| Dimer Benzene-MeNH2_NH-pi_1.10 | -2.9 <sup>a</sup> | -0.8 | -2.3    | -2.4 | -0.5 | -2.4    | -2.4 |
| Dimer Benzene-MeNH2_NH-pi_1.25 | -1.9 <sup>a</sup> | -0.6 | -1.6    | -1.6 | -0.5 | -1.6    | -1.6 |
| Dimer Benzene-MeNH2_NH-pi_1.50 | -0.9 <sup>a</sup> | -0.4 | -0.8    | -0.8 | -0.3 | -0.8    | -0.8 |
| Dimer Benzene-MeNH2_NH-pi_2.00 | -0.3 <sup>a</sup> | -0.1 | -0.2    | -0.2 | -0.1 | -0.2    | -0.2 |
| Dimer Benzene-Peptide_NH-pi_0. | -3.7 <sup>a</sup> | -1.0 | -4.7    | -4.7 | 1.1  | -3.7    | -3.0 |
| Dimer Benzene-Peptide_NH-pi_0. | -5.0 <sup>a</sup> | -1.7 | -5.0    | -5.0 | -0.3 | -4.4    | -3.9 |
| Dimer Benzene-Peptide_NH-pi_1. | -5.3 <sup>a</sup> | -1.9 | -4.8    | -4.8 | -0.9 | -4.5    | -4.2 |
| Dimer Benzene-Peptide_NH-pi_1. | -5.1 <sup>a</sup> | -1.8 | -4.4    | -4.4 | -1.1 | -4.2    | -4.0 |
| Dimer Benzene-Peptide_NH-pi_1. | -4.8 <sup>a</sup> | -1.7 | -3.9    | -3.9 | -1.2 | -3.9    | -3.7 |
| Dimer Benzene-Peptide_NH-pi_1. | -3.4 <sup>a</sup> | -1.3 | -2.8    | -2.7 | -1.1 | -2.7    | -2.7 |

... continued on next page ...



Table S77: ... continued from previous page ...

| Species                        | Ref.              | OM2  | OM2-D3T | ODM2 | OM3  | OM3-D3T | ODM3 |
|--------------------------------|-------------------|------|---------|------|------|---------|------|
| Dimer Benzene-Peptide_NH-pi.1. | -1.8 <sup>a</sup> | -0.8 | -1.5    | -1.5 | -0.7 | -1.5    | -1.4 |
| Dimer Benzene-Peptide_NH-pi.2. | -0.6 <sup>a</sup> | -0.4 | -0.6    | -0.5 | -0.4 | -0.5    | -0.5 |
| Dimer Pyridine-Pyridine_CH-N.0 | -2.8 <sup>a</sup> | -1.8 | -3.5    | -3.0 | -0.7 | -2.9    | -3.2 |
| Dimer Pyridine-Pyridine_CH-N.0 | -3.8 <sup>a</sup> | -2.4 | -4.0    | -3.8 | -1.4 | -3.4    | -3.6 |
| Dimer Pyridine-Pyridine_CH-N.1 | -4.1 <sup>a</sup> | -2.6 | -3.9    | -4.0 | -1.8 | -3.4    | -3.7 |
| Dimer Pyridine-Pyridine_CH-N.1 | -3.9 <sup>a</sup> | -2.4 | -3.5    | -3.7 | -1.7 | -3.1    | -3.4 |
| Dimer Pyridine-Pyridine_CH-N.1 | -3.4 <sup>a</sup> | -2.1 | -3.1    | -3.3 | -1.6 | -2.8    | -3.0 |
| Dimer Pyridine-Pyridine_CH-N.1 | -2.2 <sup>a</sup> | -1.3 | -1.9    | -2.1 | -1.0 | -1.8    | -1.9 |
| Dimer Pyridine-Pyridine_CH-N.1 | -1.0 <sup>a</sup> | -0.6 | -1.0    | -1.0 | -0.5 | -0.8    | -0.9 |
| Dimer Pyridine-Pyridine_CH-N.2 | -0.3 <sup>a</sup> | -0.2 | -0.3    | -0.3 | -0.1 | -0.2    | -0.3 |
| Dimer Ethyne-Water_CH-O.0.90   | -2.5 <sup>a</sup> | -3.7 | -4.1    | -4.0 | -3.1 | -3.6    | -3.1 |
| Dimer Ethyne-Water_CH-O.0.95   | -2.8 <sup>a</sup> | -3.4 | -3.7    | -3.6 | -2.9 | -3.4    | -3.0 |
| Dimer Ethyne-Water_CH-O.1.00   | -2.8 <sup>a</sup> | -3.0 | -3.3    | -3.2 | -2.7 | -3.1    | -2.8 |
| Dimer Ethyne-Water_CH-O.1.05   | -2.8 <sup>a</sup> | -2.7 | -3.0    | -2.9 | -2.5 | -2.9    | -2.6 |
| Dimer Ethyne-Water_CH-O.1.10   | -2.6 <sup>a</sup> | -2.4 | -2.7    | -2.6 | -2.3 | -2.6    | -2.4 |
| Dimer Ethyne-Water_CH-O.1.25   | -2.0 <sup>a</sup> | -1.8 | -2.0    | -1.9 | -1.7 | -2.0    | -1.8 |
| Dimer Ethyne-Water_CH-O.1.50   | -1.2 <sup>a</sup> | -1.1 | -1.2    | -1.2 | -1.1 | -1.2    | -1.1 |
| Dimer Ethyne-Water_CH-O.2.00   | -0.5 <sup>a</sup> | -0.5 | -0.5    | -0.5 | -0.5 | -0.5    | -0.5 |
| Dimer Ethyne-AcOH_OH-pi.0.90   | -4.3 <sup>a</sup> | -4.8 | -6.0    | -5.9 | -3.1 | -4.7    | -4.2 |
| Dimer Ethyne-AcOH_OH-pi.0.95   | -4.8 <sup>a</sup> | -4.4 | -5.4    | -5.4 | -3.0 | -4.5    | -4.1 |
| Dimer Ethyne-AcOH_OH-pi.1.00   | -4.9 <sup>a</sup> | -3.9 | -4.8    | -4.8 | -2.8 | -4.1    | -3.8 |
| Dimer Ethyne-AcOH_OH-pi.1.05   | -4.7 <sup>a</sup> | -3.4 | -4.2    | -4.2 | -2.5 | -3.7    | -3.4 |
| Dimer Ethyne-AcOH_OH-pi.1.10   | -4.4 <sup>a</sup> | -2.9 | -3.7    | -3.7 | -2.2 | -3.3    | -3.1 |
| Dimer Ethyne-AcOH_OH-pi.1.25   | -3.3 <sup>a</sup> | -1.9 | -2.5    | -2.5 | -1.6 | -2.3    | -2.2 |
| Dimer Ethyne-AcOH_OH-pi.1.50   | -1.8 <sup>a</sup> | -1.0 | -1.4    | -1.4 | -0.9 | -1.3    | -1.2 |
| Dimer Ethyne-AcOH_OH-pi.2.00   | -0.6 <sup>a</sup> | -0.4 | -0.5    | -0.5 | -0.3 | -0.4    | -0.4 |
| Dimer Pentane-AcOH.0.90        | -2.7 <sup>a</sup> | -0.6 | -3.4    | -3.4 | 0.4  | -3.2    | -2.9 |
| Dimer Pentane-AcOH.0.95        | -2.9 <sup>a</sup> | -0.6 | -3.2    | -3.2 | 0.0  | -3.1    | -3.0 |
| Dimer Pentane-AcOH.1.00        | -2.9 <sup>a</sup> | -0.6 | -2.9    | -3.0 | -0.1 | -3.0    | -2.9 |
| Dimer Pentane-AcOH.1.05        | -2.7 <sup>a</sup> | -0.5 | -2.6    | -2.7 | -0.2 | -2.7    | -2.7 |
| Dimer Pentane-AcOH.1.10        | -2.5 <sup>a</sup> | -0.5 | -2.3    | -2.4 | -0.3 | -2.5    | -2.5 |
| Dimer Pentane-AcOH.1.25        | -1.8 <sup>a</sup> | -0.3 | -1.6    | -1.7 | -0.2 | -1.7    | -1.8 |
| Dimer Pentane-AcOH.1.50        | -0.8 <sup>a</sup> | -0.1 | -0.8    | -0.8 | -0.1 | -0.8    | -0.8 |
| Dimer Pentane-AcOH.2.00        | -0.2 <sup>a</sup> | -0.0 | -0.2    | -0.2 | -0.0 | -0.2    | -0.2 |
| Dimer Pentane-AcNH2.0.90       | -3.2 <sup>a</sup> | -0.7 | -3.8    | -3.8 | 0.6  | -3.4    | -3.0 |
| Dimer Pentane-AcNH2.0.95       | -3.5 <sup>a</sup> | -0.8 | -3.6    | -3.7 | 0.1  | -3.5    | -3.2 |
| Dimer Pentane-AcNH2.1.00       | -3.5 <sup>a</sup> | -0.8 | -3.3    | -3.4 | -0.2 | -3.3    | -3.2 |
| Dimer Pentane-AcNH2.1.05       | -3.3 <sup>a</sup> | -0.7 | -3.0    | -3.1 | -0.3 | -3.0    | -3.0 |
| Dimer Pentane-AcNH2.1.10       | -3.0 <sup>a</sup> | -0.6 | -2.6    | -2.7 | -0.3 | -2.7    | -2.7 |
| Dimer Pentane-AcNH2.1.25       | -2.1 <sup>a</sup> | -0.4 | -1.7    | -1.8 | -0.3 | -1.8    | -1.9 |
| Dimer Pentane-AcNH2.1.50       | -1.0 <sup>a</sup> | -0.2 | -0.9    | -0.9 | -0.1 | -0.9    | -0.9 |
| Dimer Pentane-AcNH2.2.00       | -0.3 <sup>a</sup> | -0.0 | -0.2    | -0.2 | -0.0 | -0.2    | -0.2 |
| Dimer Benzene-AcOH.0.90        | -2.7 <sup>a</sup> | -1.3 | -4.3    | -4.4 | 0.2  | -3.8    | -3.5 |
| Dimer Benzene-AcOH.0.95        | -3.6 <sup>a</sup> | -1.5 | -4.2    | -4.3 | -0.4 | -3.9    | -3.7 |
| Dimer Benzene-AcOH.1.00        | -3.8 <sup>a</sup> | -1.5 | -3.9    | -4.0 | -0.7 | -3.7    | -3.6 |
| Dimer Benzene-AcOH.1.05        | -3.7 <sup>a</sup> | -1.3 | -3.5    | -3.6 | -0.8 | -3.4    | -3.3 |
| Dimer Benzene-AcOH.1.10        | -3.3 <sup>a</sup> | -1.2 | -3.1    | -3.1 | -0.8 | -3.0    | -3.0 |
| Dimer Benzene-AcOH.1.25        | -2.2 <sup>a</sup> | -0.9 | -2.0    | -2.1 | -0.6 | -1.9    | -2.0 |
| Dimer Benzene-AcOH.1.50        | -1.0 <sup>a</sup> | -0.5 | -1.0    | -1.0 | -0.4 | -0.9    | -0.9 |
| Dimer Benzene-AcOH.2.00        | -0.3 <sup>a</sup> | -0.2 | -0.3    | -0.3 | -0.1 | -0.2    | -0.2 |
| Dimer Peptide-Ethene.0.90      | -2.6 <sup>a</sup> | -1.3 | -3.3    | -3.3 | -0.3 | -2.9    | -2.7 |
| Dimer Peptide-Ethene.0.95      | -2.9 <sup>a</sup> | -1.3 | -3.1    | -3.2 | -0.6 | -2.9    | -2.8 |
| Dimer Peptide-Ethene.1.00      | -3.0 <sup>a</sup> | -1.2 | -2.8    | -2.9 | -0.7 | -2.7    | -2.7 |
| Dimer Peptide-Ethene.1.05      | -2.9 <sup>a</sup> | -1.0 | -2.5    | -2.6 | -0.7 | -2.5    | -2.5 |
| Dimer Peptide-Ethene.1.10      | -2.6 <sup>a</sup> | -0.9 | -2.2    | -2.3 | -0.7 | -2.3    | -2.3 |
| Dimer Peptide-Ethene.1.25      | -1.9 <sup>a</sup> | -0.6 | -1.6    | -1.6 | -0.5 | -1.6    | -1.6 |
| Dimer Peptide-Ethene.1.50      | -0.9 <sup>a</sup> | -0.3 | -0.8    | -0.8 | -0.3 | -0.8    | -0.8 |
| Dimer Peptide-Ethene.2.00      | -0.2 <sup>a</sup> | -0.1 | -0.2    | -0.2 | -0.1 | -0.2    | -0.2 |
| Dimer Pyridine-Ethyne.0.90     | -3.5 <sup>a</sup> | -4.0 | -4.9    | -4.5 | -3.6 | -4.7    | -5.0 |
| Dimer Pyridine-Ethyne.0.95     | -3.9 <sup>a</sup> | -3.7 | -4.5    | -4.3 | -3.2 | -4.3    | -4.4 |
| Dimer Pyridine-Ethyne.1.00     | -4.0 <sup>a</sup> | -3.3 | -4.1    | -4.0 | -2.9 | -3.8    | -4.0 |
| Dimer Pyridine-Ethyne.1.05     | -3.9 <sup>a</sup> | -3.0 | -3.7    | -3.7 | -2.6 | -3.4    | -3.6 |
| Dimer Pyridine-Ethyne.1.10     | -3.7 <sup>a</sup> | -2.7 | -3.3    | -3.4 | -2.3 | -3.1    | -3.2 |
| Dimer Pyridine-Ethyne.1.25     | -2.8 <sup>a</sup> | -2.0 | -2.4    | -2.5 | -1.7 | -2.2    | -2.3 |
| Dimer Pyridine-Ethyne.1.50     | -1.7 <sup>a</sup> | -1.2 | -1.4    | -1.5 | -1.0 | -1.3    | -1.4 |

... continued on next page ...

Table S77: ... continued from previous page ...

| Species                    | Ref.              | OM2  | OM2-D3T | ODM2 | OM3  | OM3-D3T | ODM3 |
|----------------------------|-------------------|------|---------|------|------|---------|------|
| Dimer Pyridine-Ethyne_2.00 | -0.6 <sup>a</sup> | -0.5 | -0.6    | -0.6 | -0.4 | -0.5    | -0.6 |
| Dimer MeNH2-Pyridine_0.90  | -3.4 <sup>a</sup> | -0.2 | -2.4    | -2.6 | 0.3  | -2.5    | -2.7 |
| Dimer MeNH2-Pyridine_0.95  | -3.9 <sup>a</sup> | -0.8 | -2.8    | -3.0 | -0.3 | -2.9    | -3.1 |
| Dimer MeNH2-Pyridine_1.00  | -4.0 <sup>a</sup> | -1.0 | -2.8    | -3.0 | -0.6 | -2.9    | -3.1 |
| Dimer MeNH2-Pyridine_1.05  | -3.9 <sup>a</sup> | -1.1 | -2.7    | -2.9 | -0.8 | -2.8    | -3.1 |
| Dimer MeNH2-Pyridine_1.10  | -3.6 <sup>a</sup> | -1.0 | -2.6    | -2.8 | -0.8 | -2.7    | -2.9 |
| Dimer MeNH2-Pyridine_1.25  | -2.7 <sup>a</sup> | -0.8 | -1.9    | -2.1 | -0.7 | -2.0    | -2.2 |
| Dimer MeNH2-Pyridine_1.50  | -1.5 <sup>a</sup> | -0.5 | -1.1    | -1.2 | -0.5 | -1.1    | -1.2 |
| Dimer MeNH2-Pyridine_2.00  | -0.5 <sup>a</sup> | -0.2 | -0.4    | -0.4 | -0.2 | -0.4    | -0.4 |

a J.Rezac, K.E.Riley, and P.Hobza, J.Chem.Theory Comput. 7, 2427 (2011) ; 7, 3466 (2011).

Table S78: Benchmark Results for the S66a8 Set. Interaction Energies (kcal/mol)

| Species                   | Ref.              | OM2  | OM2-D3T | ODM2 | OM3  | OM3-D3T | ODM3 |
|---------------------------|-------------------|------|---------|------|------|---------|------|
| Dimer Water-Water_1.y.-30 | -4.1 <sup>a</sup> | -3.2 | -3.6    | -3.6 | -3.6 | -4.0    | -3.7 |
| Dimer Water-Water_1.y.+30 | -4.1 <sup>a</sup> | -3.2 | -3.6    | -3.6 | -3.6 | -4.0    | -3.7 |
| Dimer Water-Water_1.z.-30 | -4.3 <sup>a</sup> | -3.5 | -3.9    | -4.0 | -3.9 | -4.4    | -4.1 |
| Dimer Water-Water_1.z.+30 | -4.2 <sup>a</sup> | -3.2 | -3.5    | -3.6 | -3.4 | -3.9    | -3.6 |
| Dimer Water-Water_2.y.-30 | -3.9 <sup>a</sup> | -3.2 | -3.6    | -3.7 | -3.2 | -3.7    | -3.3 |
| Dimer Water-Water_2.y.+30 | -3.9 <sup>a</sup> | -3.2 | -3.6    | -3.7 | -3.2 | -3.7    | -3.3 |
| Dimer Water-Water_2.z.-30 | -4.5 <sup>a</sup> | -3.3 | -3.7    | -3.9 | -3.3 | -3.8    | -3.4 |
| Dimer Water-Water_2.z.+30 | -4.7 <sup>a</sup> | -3.7 | -4.0    | -4.0 | -3.9 | -4.3    | -4.0 |
| Dimer Water-MeOH_1.y.-30  | -4.7 <sup>a</sup> | -3.4 | -3.9    | -4.0 | -3.4 | -4.1    | -3.8 |
| Dimer Water-MeOH_1.y.+30  | -4.8 <sup>a</sup> | -3.2 | -3.8    | -4.0 | -3.2 | -4.0    | -3.7 |
| Dimer Water-MeOH_1.z.-30  | -4.8 <sup>a</sup> | -3.6 | -4.2    | -4.3 | -3.7 | -4.4    | -4.1 |
| Dimer Water-MeOH_1.z.+30  | -4.9 <sup>a</sup> | -3.1 | -3.7    | -3.9 | -3.0 | -3.8    | -3.5 |
| Dimer Water-MeOH_2.y.-30  | -4.4 <sup>a</sup> | -3.0 | -3.4    | -3.7 | -2.6 | -3.2    | -2.9 |
| Dimer Water-MeOH_2.y.+30  | -3.3 <sup>a</sup> | -2.7 | -3.3    | -3.2 | -2.3 | -3.2    | -2.7 |
| Dimer Water-MeOH_2.z.-30  | -4.7 <sup>a</sup> | -3.0 | -3.7    | -3.8 | -2.4 | -3.4    | -2.9 |
| Dimer Water-MeOH_2.z.+30  | -5.3 <sup>a</sup> | -3.6 | -4.1    | -4.3 | -3.5 | -4.1    | -3.8 |
| Dimer Water-MeNH2_1.y.-30 | -5.6 <sup>a</sup> | -3.6 | -4.1    | -4.0 | -4.0 | -4.7    | -5.0 |
| Dimer Water-MeNH2_1.y.+30 | -5.6 <sup>a</sup> | -3.5 | -4.1    | -3.9 | -3.9 | -4.7    | -4.9 |
| Dimer Water-MeNH2_1.z.-30 | -5.8 <sup>a</sup> | -4.1 | -4.7    | -4.5 | -4.6 | -5.4    | -5.7 |
| Dimer Water-MeNH2_1.z.+30 | -5.8 <sup>a</sup> | -3.3 | -3.8    | -3.6 | -3.6 | -4.4    | -4.6 |
| Dimer Water-MeNH2_2.y.-30 | -5.6 <sup>a</sup> | -3.1 | -3.8    | -3.3 | -3.5 | -4.4    | -4.6 |
| Dimer Water-MeNH2_2.y.+30 | -5.6 <sup>a</sup> | -3.1 | -3.8    | -3.4 | -3.5 | -4.4    | -4.6 |
| Dimer Water-MeNH2_2.z.-30 | -5.6 <sup>a</sup> | -3.3 | -3.9    | -3.5 | -3.8 | -4.6    | -4.7 |
| Dimer Water-MeNH2_2.z.+30 | -5.6 <sup>a</sup> | -2.7 | -3.5    | -3.1 | -2.8 | -3.9    | -4.1 |
| Dimer MeOH-Water_1.y.-30  | -4.3 <sup>a</sup> | -2.8 | -3.2    | -3.3 | -3.0 | -3.6    | -3.4 |
| Dimer MeOH-Water_1.y.+30  | -4.3 <sup>a</sup> | -2.8 | -3.2    | -3.3 | -3.0 | -3.6    | -3.4 |
| Dimer MeOH-Water_1.z.-30  | -4.5 <sup>a</sup> | -2.7 | -3.2    | -3.4 | -3.0 | -3.7    | -3.5 |
| Dimer MeOH-Water_1.z.+30  | -4.4 <sup>a</sup> | -2.9 | -3.3    | -3.4 | -3.1 | -3.6    | -3.4 |
| Dimer MeOH-Water_2.y.-30  | -4.0 <sup>a</sup> | -2.7 | -3.2    | -3.3 | -2.6 | -3.2    | -2.9 |
| Dimer MeOH-Water_2.y.+30  | -4.0 <sup>a</sup> | -2.7 | -3.2    | -3.3 | -2.6 | -3.2    | -2.9 |
| Dimer MeOH-Water_2.z.-30  | -4.7 <sup>a</sup> | -2.8 | -3.3    | -3.6 | -2.8 | -3.4    | -3.1 |
| Dimer MeOH-Water_2.z.+30  | -4.8 <sup>a</sup> | -3.2 | -3.6    | -3.7 | -3.4 | -3.9    | -3.6 |
| Dimer MeNH2-Water_1.y.-30 | -6.1 <sup>a</sup> | -3.4 | -4.1    | -3.8 | -3.6 | -4.6    | -4.8 |
| Dimer MeNH2-Water_1.y.+30 | -6.1 <sup>a</sup> | -3.3 | -4.0    | -3.7 | -3.5 | -4.5    | -4.7 |
| Dimer MeNH2-Water_1.z.-30 | -4.3 <sup>a</sup> | -2.9 | -3.7    | -3.6 | -2.6 | -3.6    | -3.5 |
| Dimer MeNH2-Water_1.z.+30 | -6.0 <sup>a</sup> | -3.0 | -3.6    | -3.3 | -3.5 | -4.2    | -4.5 |
| Dimer MeNH2-Water_2.y.-30 | -5.9 <sup>a</sup> | -3.6 | -4.4    | -4.1 | -4.0 | -5.0    | -5.3 |
| Dimer MeNH2-Water_2.y.+30 | -5.8 <sup>a</sup> | -3.8 | -4.5    | -4.2 | -4.2 | -5.2    | -5.4 |
| Dimer MeNH2-Water_2.z.-30 | -6.0 <sup>a</sup> | -4.3 | -5.0    | -4.8 | -4.8 | -5.8    | -6.1 |
| Dimer MeNH2-Water_2.z.+30 | -6.0 <sup>a</sup> | -3.1 | -3.8    | -3.6 | -3.3 | -4.4    | -4.5 |
| Dimer MeOH-MeOH_1.y.-30   | -4.9 <sup>a</sup> | -2.8 | -3.5    | -3.7 | -2.9 | -3.7    | -3.5 |
| Dimer MeOH-MeOH_1.y.+30   | -5.0 <sup>a</sup> | -2.8 | -3.6    | -3.8 | -2.7 | -3.8    | -3.5 |
| Dimer MeOH-MeOH_1.z.-30   | -5.2 <sup>a</sup> | -2.9 | -3.7    | -3.9 | -2.8 | -4.0    | -3.7 |
| Dimer MeOH-MeOH_1.z.+30   | -5.1 <sup>a</sup> | -2.9 | -3.5    | -3.7 | -2.8 | -3.7    | -3.4 |
| Dimer MeOH-MeOH_2.y.-30   | -4.8 <sup>a</sup> | -2.7 | -3.3    | -3.5 | -2.4 | -3.2    | -2.9 |
| Dimer MeOH-MeOH_2.y.+30   | -3.3 <sup>a</sup> | -2.0 | -2.8    | -2.7 | -1.5 | -2.6    | -2.2 |
| Dimer MeOH-MeOH_2.z.-30   | -5.4 <sup>a</sup> | -2.8 | -3.7    | -3.9 | -2.4 | -3.5    | -3.1 |
| Dimer MeOH-MeOH_2.z.+30   | -5.6 <sup>a</sup> | -3.2 | -3.9    | -4.0 | -2.9 | -3.9    | -3.6 |
| Dimer MeOH-MeNH2_1.y.-30  | -6.3 <sup>a</sup> | -3.1 | -4.1    | -3.8 | -3.5 | -4.8    | -5.1 |
| Dimer MeOH-MeNH2_1.y.+30  | -6.3 <sup>a</sup> | -3.1 | -4.1    | -3.8 | -3.5 | -4.8    | -5.1 |
| Dimer MeOH-MeNH2_1.z.-30  | -5.6 <sup>a</sup> | -2.5 | -3.7    | -3.6 | -2.4 | -4.0    | -4.0 |
| Dimer MeOH-MeNH2_1.z.+30  | -6.4 <sup>a</sup> | -3.2 | -4.0    | -3.5 | -3.7 | -4.7    | -5.1 |
| Dimer MeOH-MeNH2_2.y.-30  | -6.2 <sup>a</sup> | -2.6 | -3.7    | -3.2 | -3.0 | -4.4    | -4.7 |
| Dimer MeOH-MeNH2_2.y.+30  | -6.2 <sup>a</sup> | -2.6 | -3.7    | -3.2 | -3.0 | -4.4    | -4.6 |
| Dimer MeOH-MeNH2_2.z.-30  | -6.3 <sup>a</sup> | -2.9 | -3.7    | -3.2 | -3.5 | -4.5    | -4.8 |
| Dimer MeOH-MeNH2_2.z.+30  | -4.8 <sup>a</sup> | -1.8 | -3.1    | -2.8 | -1.3 | -3.0    | -2.8 |
| Dimer MeNH2-MeOH_1.y.-30  | -2.6 <sup>a</sup> | -1.3 | -2.2    | -2.3 | -1.3 | -2.3    | -2.4 |
| Dimer MeNH2-MeOH_1.y.+30  | -2.6 <sup>a</sup> | -1.0 | -1.9    | -2.0 | -1.0 | -2.0    | -2.1 |
| Dimer MeNH2-MeOH_1.z.-30  | -2.1 <sup>a</sup> | -0.7 | -1.6    | -1.7 | -0.5 | -1.7    | -1.7 |
| Dimer MeNH2-MeOH_1.z.+30  | -2.6 <sup>a</sup> | -1.4 | -2.0    | -2.1 | -1.3 | -2.1    | -2.2 |
| Dimer MeNH2-MeOH_2.y.-30  | -2.9 <sup>a</sup> | -1.1 | -2.1    | -2.2 | -0.9 | -2.0    | -2.1 |
| Dimer MeNH2-MeOH_2.y.+30  | -2.7 <sup>a</sup> | -1.3 | -2.3    | -2.4 | -1.1 | -2.2    | -2.3 |
| Dimer MeNH2-MeOH_2.z.-30  | -2.7 <sup>a</sup> | -1.5 | -2.1    | -2.3 | -1.3 | -2.1    | -2.2 |
| Dimer MeNH2-MeOH_2.z.+30  | -2.1 <sup>a</sup> | -0.7 | -1.8    | -1.8 | -0.4 | -1.7    | -1.6 |

... continued on next page ...

Table S78: ... continued from previous page ...

| Species                       | Ref.              | OM2  | OM2-D3T | ODM2 | OM3  | OM3-D3T | ODM3 |
|-------------------------------|-------------------|------|---------|------|------|---------|------|
| Dimer MeNH2-MeNH2_1.y_-30     | -3.1 <sup>a</sup> | -1.2 | -2.3    | -2.4 | -0.8 | -2.3    | -2.3 |
| Dimer MeNH2-MeNH2_1.y_+30     | -3.7 <sup>a</sup> | -1.5 | -2.5    | -2.6 | -1.3 | -2.5    | -2.7 |
| Dimer MeNH2-MeNH2_1.z_-30     | -3.2 <sup>a</sup> | -1.1 | -2.3    | -2.3 | -0.7 | -2.2    | -2.1 |
| Dimer MeNH2-MeNH2_1.z_+30     | -3.4 <sup>a</sup> | -1.7 | -2.7    | -2.8 | -1.7 | -2.8    | -3.2 |
| Dimer MeNH2-MeNH2_2.y_-30     | -3.2 <sup>a</sup> | -1.2 | -2.4    | -2.4 | -0.7 | -2.2    | -2.2 |
| Dimer MeNH2-MeNH2_2.y_+30     | -3.3 <sup>a</sup> | -1.2 | -2.2    | -2.2 | -1.0 | -2.3    | -2.4 |
| Dimer MeNH2-MeNH2_2.z_-30     | -3.1 <sup>a</sup> | -0.9 | -1.7    | -1.7 | -0.9 | -1.8    | -2.1 |
| Dimer MeNH2-MeNH2_2.z_+30     | -1.6 <sup>a</sup> | -1.0 | -1.8    | -1.8 | -0.7 | -1.7    | -1.7 |
| Dimer Water-Peptide_1.y_-30   | -6.8 <sup>a</sup> | -5.1 | -6.0    | -6.1 | -5.0 | -6.1    | -5.6 |
| Dimer Water-Peptide_1.y_+30   | -6.8 <sup>a</sup> | -5.2 | -6.0    | -6.1 | -5.0 | -6.1    | -5.7 |
| Dimer Water-Peptide_1.z_-30   | -6.8 <sup>a</sup> | -5.4 | -6.2    | -6.2 | -5.3 | -6.3    | -5.9 |
| Dimer Water-Peptide_1.z_+30   | -6.3 <sup>a</sup> | -4.8 | -5.7    | -5.8 | -4.4 | -5.6    | -5.2 |
| Dimer Water-Peptide_2.y_-30   | -7.8 <sup>a</sup> | -5.9 | -6.8    | -6.9 | -5.5 | -6.6    | -6.1 |
| Dimer Water-Peptide_2.y_+30   | -7.7 <sup>a</sup> | -5.9 | -6.8    | -6.9 | -5.4 | -6.6    | -6.0 |
| Dimer Water-Peptide_2.z_-30   | -1.8 <sup>a</sup> | -1.5 | -2.1    | -2.0 | -1.2 | -2.0    | -1.7 |
| Dimer Water-Peptide_2.z_+30   | -6.7 <sup>a</sup> | -5.0 | -5.5    | -5.6 | -4.7 | -5.5    | -5.1 |
| Dimer Peptide-Water_1.y_-30   | -4.5 <sup>a</sup> | -3.2 | -3.9    | -3.9 | -3.3 | -4.1    | -4.0 |
| Dimer Peptide-Water_1.y_+30   | -4.5 <sup>a</sup> | -3.2 | -3.9    | -3.9 | -3.3 | -4.1    | -4.0 |
| Dimer Peptide-Water_1.z_-30   | -3.9 <sup>a</sup> | -3.1 | -3.7    | -3.7 | -3.2 | -3.9    | -3.8 |
| Dimer Peptide-Water_1.z_+30   | -4.5 <sup>a</sup> | -3.1 | -3.7    | -3.7 | -3.1 | -3.9    | -3.8 |
| Dimer Peptide-Water_2.y_-30   | -4.4 <sup>a</sup> | -3.1 | -3.8    | -3.9 | -3.0 | -3.8    | -3.7 |
| Dimer Peptide-Water_2.y_+30   | -4.4 <sup>a</sup> | -3.2 | -3.9    | -3.9 | -3.0 | -3.9    | -3.7 |
| Dimer Peptide-Water_2.z_-30   | -5.0 <sup>a</sup> | -3.5 | -4.2    | -4.3 | -3.5 | -4.3    | -4.3 |
| Dimer Peptide-Water_2.z_+30   | -5.0 <sup>a</sup> | -3.5 | -4.1    | -4.2 | -3.5 | -4.3    | -4.2 |
| Dimer MeOH-Peptide_1.y_-30    | -7.3 <sup>a</sup> | -4.3 | -5.8    | -5.9 | -4.0 | -5.8    | -5.4 |
| Dimer MeOH-Peptide_1.y_+30    | -7.0 <sup>a</sup> | -3.8 | -4.8    | -4.9 | -3.6 | -4.8    | -4.4 |
| Dimer MeOH-Peptide_1.z_-30    | -6.7 <sup>a</sup> | -4.2 | -5.5    | -5.6 | -3.7 | -5.4    | -4.9 |
| Dimer MeOH-Peptide_1.z_+30    | -7.0 <sup>a</sup> | -3.8 | -4.9    | -5.0 | -3.7 | -5.1    | -4.7 |
| Dimer MeOH-Peptide_2.y_-30    | -6.9 <sup>a</sup> | -3.9 | -5.3    | -5.2 | -3.0 | -4.9    | -4.3 |
| Dimer MeOH-Peptide_2.y_+30    | -7.4 <sup>a</sup> | -4.6 | -5.6    | -5.7 | -4.3 | -5.6    | -5.2 |
| Dimer MeOH-Peptide_2.z_-30    | -6.9 <sup>a</sup> | -4.3 | -5.1    | -5.1 | -4.1 | -5.1    | -4.8 |
| Dimer MeOH-Peptide_2.z_+30    | -1.2 <sup>a</sup> | -1.0 | -1.7    | -1.6 | -0.7 | -1.5    | -1.3 |
| Dimer MeNH2-Peptide_1.y_-30   | -4.5 <sup>a</sup> | -2.0 | -3.8    | -4.1 | -1.6 | -3.9    | -4.0 |
| Dimer MeNH2-Peptide_1.y_+30   | -4.5 <sup>a</sup> | -2.6 | -3.9    | -4.0 | -2.3 | -3.9    | -4.1 |
| Dimer MeNH2-Peptide_1.z_-30   | -4.4 <sup>a</sup> | -2.1 | -3.8    | -4.0 | -1.6 | -3.8    | -3.9 |
| Dimer MeNH2-Peptide_1.z_+30   | -4.6 <sup>a</sup> | -2.7 | -3.9    | -4.1 | -2.1 | -3.7    | -3.8 |
| Dimer MeNH2-Peptide_2.y_-30   | -4.5 <sup>a</sup> | -1.9 | -3.5    | -3.8 | -1.4 | -3.4    | -3.5 |
| Dimer MeNH2-Peptide_2.y_+30   | -2.0 <sup>a</sup> | -1.2 | -2.2    | -2.1 | -0.8 | -2.0    | -1.9 |
| Dimer MeNH2-Peptide_2.z_-30   | -4.2 <sup>a</sup> | -2.1 | -3.2    | -3.4 | -1.8 | -3.1    | -3.3 |
| Dimer MeNH2-Peptide_2.z_+30   | -3.0 <sup>a</sup> | -1.5 | -3.0    | -3.1 | -1.1 | -3.0    | -3.0 |
| Dimer Peptide-MeOH_1.y_-30    | -5.5 <sup>a</sup> | -3.3 | -4.7    | -4.7 | -3.1 | -4.7    | -4.5 |
| Dimer Peptide-MeOH_1.y_+30    | -5.4 <sup>a</sup> | -3.4 | -4.6    | -4.6 | -3.2 | -4.6    | -4.5 |
| Dimer Peptide-MeOH_1.z_-30    | -4.7 <sup>a</sup> | -2.9 | -4.3    | -4.3 | -2.6 | -4.3    | -4.1 |
| Dimer Peptide-MeOH_1.z_+30    | -5.6 <sup>a</sup> | -3.5 | -4.5    | -4.6 | -3.2 | -4.5    | -4.3 |
| Dimer Peptide-MeOH_2.y_-30    | -4.1 <sup>a</sup> | -2.4 | -3.8    | -3.6 | -1.8 | -3.6    | -3.2 |
| Dimer Peptide-MeOH_2.y_+30    | -5.5 <sup>a</sup> | -3.4 | -4.5    | -4.6 | -3.1 | -4.3    | -4.2 |
| Dimer Peptide-MeOH_2.z_-30    | -5.8 <sup>a</sup> | -3.8 | -4.8    | -5.0 | -3.4 | -4.7    | -4.7 |
| Dimer Peptide-MeOH_2.z_+30    | -5.3 <sup>a</sup> | -3.0 | -4.5    | -4.5 | -2.3 | -4.3    | -4.0 |
| Dimer Peptide-MeNH2_1.y_-30   | -6.5 <sup>a</sup> | -3.5 | -5.2    | -5.2 | -3.5 | -5.5    | -5.9 |
| Dimer Peptide-MeNH2_1.y_+30   | -6.4 <sup>a</sup> | -3.8 | -5.2    | -5.1 | -3.6 | -5.4    | -5.7 |
| Dimer Peptide-MeNH2_1.z_-30   | -5.6 <sup>a</sup> | -2.9 | -4.5    | -4.4 | -2.4 | -4.4    | -4.4 |
| Dimer Peptide-MeNH2_1.z_+30   | -6.5 <sup>a</sup> | -3.6 | -5.0    | -4.9 | -3.7 | -5.3    | -5.7 |
| Dimer Peptide-MeNH2_2.y_-30   | -4.6 <sup>a</sup> | -2.4 | -4.1    | -4.0 | -1.7 | -3.8    | -3.8 |
| Dimer Peptide-MeNH2_2.y_+30   | -6.3 <sup>a</sup> | -3.3 | -4.6    | -4.4 | -3.4 | -5.0    | -5.5 |
| Dimer Peptide-MeNH2_2.z_-30   | -6.2 <sup>a</sup> | -3.4 | -4.7    | -4.6 | -3.4 | -5.1    | -5.6 |
| Dimer Peptide-MeNH2_2.z_+30   | -5.7 <sup>a</sup> | -2.6 | -4.4    | -4.1 | -2.0 | -4.2    | -4.3 |
| Dimer Peptide-Peptide_1.y_-30 | -7.6 <sup>a</sup> | -4.5 | -6.6    | -6.7 | -3.8 | -6.5    | -6.3 |
| Dimer Peptide-Peptide_1.y_+30 | -7.5 <sup>a</sup> | -4.3 | -6.0    | -6.0 | -3.7 | -5.8    | -5.6 |
| Dimer Peptide-Peptide_1.z_-30 | -6.4 <sup>a</sup> | -3.9 | -5.9    | -5.7 | -3.1 | -5.6    | -5.3 |
| Dimer Peptide-Peptide_1.z_+30 | -7.6 <sup>a</sup> | -4.3 | -5.9    | -6.0 | -3.8 | -5.7    | -5.6 |
| Dimer Peptide-Peptide_2.y_-30 | -3.0 <sup>a</sup> | -1.4 | -3.0    | -2.8 | -0.8 | -2.8    | -2.4 |
| Dimer Peptide-Peptide_2.y_+30 | -7.9 <sup>a</sup> | -5.2 | -6.6    | -6.5 | -4.7 | -6.3    | -6.1 |
| Dimer Peptide-Peptide_2.z_-30 | -8.0 <sup>a</sup> | -5.3 | -6.8    | -6.9 | -4.6 | -6.4    | -6.3 |
| Dimer Peptide-Peptide_2.z_+30 | -7.2 <sup>a</sup> | -3.7 | -6.0    | -5.8 | -2.5 | -5.5    | -5.0 |
| Dimer Water-Pyridine_1.y_-30  | -5.8 <sup>a</sup> | -2.6 | -3.3    | -3.2 | -3.0 | -3.9    | -4.4 |

... continued on next page ...

Table S78: ... continued from previous page ...

| Species                        | Ref.               | OM2   | OM2-D3T | ODM2  | OM3   | OM3-D3T | ODM3  |
|--------------------------------|--------------------|-------|---------|-------|-------|---------|-------|
| Dimer Water-Pyridine_1.y.+30   | -5.9 <sup>a</sup>  | -3.8  | -4.5    | -4.6  | -4.2  | -5.1    | -5.6  |
| Dimer Water-Pyridine_1.z.-30   | -5.8 <sup>a</sup>  | -3.2  | -3.9    | -3.9  | -3.6  | -4.5    | -4.9  |
| Dimer Water-Pyridine_1.z.+30   | -5.8 <sup>a</sup>  | -3.2  | -3.9    | -3.9  | -3.6  | -4.5    | -4.9  |
| Dimer Water-Pyridine_2.y.-30   | -6.0 <sup>a</sup>  | -3.3  | -4.1    | -4.0  | -3.8  | -4.8    | -5.5  |
| Dimer Water-Pyridine_2.y.+30   | -6.2 <sup>a</sup>  | -3.1  | -3.8    | -3.6  | -3.5  | -4.5    | -5.1  |
| Dimer Water-Pyridine_2.z.-30   | -5.3 <sup>a</sup>  | -2.5  | -3.3    | -3.1  | -2.5  | -3.5    | -3.8  |
| Dimer Water-Pyridine_2.z.+30   | -5.3 <sup>a</sup>  | -2.5  | -3.3    | -3.1  | -2.5  | -3.5    | -3.8  |
| Dimer MeOH-Pyridine_1.y.-30    | -6.5 <sup>a</sup>  | -2.8  | -3.9    | -3.8  | -3.3  | -4.6    | -5.1  |
| Dimer MeOH-Pyridine_1.y.+30    | -6.5 <sup>a</sup>  | -2.8  | -3.9    | -3.8  | -3.3  | -4.6    | -5.1  |
| Dimer MeOH-Pyridine_1.z.-30    | -6.5 <sup>a</sup>  | -2.8  | -4.1    | -4.1  | -3.2  | -4.9    | -5.3  |
| Dimer MeOH-Pyridine_1.z.+30    | -6.4 <sup>a</sup>  | -2.6  | -3.5    | -3.2  | -3.2  | -4.3    | -4.9  |
| Dimer MeOH-Pyridine_2.y.-30    | -6.0 <sup>a</sup>  | -1.9  | -3.1    | -2.8  | -2.0  | -3.5    | -3.8  |
| Dimer MeOH-Pyridine_2.y.+30    | -6.0 <sup>a</sup>  | -1.9  | -3.1    | -2.8  | -1.9  | -3.5    | -3.8  |
| Dimer MeOH-Pyridine_2.z.-30    | -6.7 <sup>a</sup>  | -2.8  | -3.9    | -3.7  | -3.4  | -4.8    | -5.5  |
| Dimer MeOH-Pyridine_2.z.+30    | -6.7 <sup>a</sup>  | -2.6  | -3.8    | -3.5  | -3.2  | -4.7    | -5.4  |
| Dimer AcOH-AcOH_1.y.-30        | -16.2 <sup>a</sup> | -11.1 | -12.5   | -13.2 | -9.3  | -11.1   | -10.6 |
| Dimer AcOH-AcOH_1.y.+30        | -16.2 <sup>a</sup> | -11.1 | -12.5   | -13.2 | -9.3  | -11.1   | -10.6 |
| Dimer AcOH-AcOH_1.z.-30        | -11.1 <sup>a</sup> | -7.7  | -8.7    | -8.9  | -6.7  | -7.9    | -7.5  |
| Dimer AcOH-AcOH_1.z.+30        | -9.8 <sup>a</sup>  | -5.5  | -6.5    | -6.8  | -4.5  | -5.7    | -5.5  |
| Dimer AcOH-AcOH_2.y.-30        | -16.0 <sup>a</sup> | -11.3 | -12.7   | -13.4 | -9.4  | -11.2   | -10.7 |
| Dimer AcOH-AcOH_2.y.+30        | -16.0 <sup>a</sup> | -11.3 | -12.7   | -13.4 | -9.4  | -11.2   | -10.7 |
| Dimer AcOH-AcOH_2.z.-30        | -10.5 <sup>a</sup> | -8.0  | -9.0    | -9.1  | -7.0  | -8.2    | -7.7  |
| Dimer AcOH-AcOH_2.z.+30        | -7.1 <sup>a</sup>  | -3.3  | -4.4    | -4.6  | -2.1  | -3.4    | -3.2  |
| Dimer AcNH2-AcNH2_1.y.-30      | -14.1 <sup>a</sup> | -10.8 | -12.2   | -12.3 | -9.9  | -11.8   | -11.4 |
| Dimer AcNH2-AcNH2_1.y.+30      | -14.1 <sup>a</sup> | -10.8 | -12.2   | -12.3 | -9.9  | -11.8   | -11.4 |
| Dimer AcNH2-AcNH2_1.z.-30      | -10.1 <sup>a</sup> | -7.9  | -8.9    | -8.8  | -7.4  | -8.6    | -8.5  |
| Dimer AcNH2-AcNH2_1.z.+30      | -9.3 <sup>a</sup>  | -7.0  | -8.1    | -8.1  | -6.6  | -7.9    | -7.6  |
| Dimer AcNH2-AcNH2_2.y.-30      | -13.9 <sup>a</sup> | -10.9 | -12.4   | -12.4 | -10.0 | -11.9   | -11.5 |
| Dimer AcNH2-AcNH2_2.y.+30      | -13.9 <sup>a</sup> | -10.9 | -12.4   | -12.4 | -10.0 | -11.9   | -11.5 |
| Dimer AcNH2-AcNH2_2.z.-30      | -9.6 <sup>a</sup>  | -7.6  | -8.6    | -8.4  | -7.0  | -8.2    | -8.0  |
| Dimer AcNH2-AcNH2_2.z.+30      | -7.8 <sup>a</sup>  | -6.0  | -7.2    | -7.1  | -5.4  | -6.9    | -6.4  |
| Dimer AcOH-Uracil_1.y.-30      | -16.7 <sup>a</sup> | -12.7 | -14.3   | -14.7 | -11.1 | -13.2   | -12.9 |
| Dimer AcOH-Uracil_1.y.+30      | -16.7 <sup>a</sup> | -12.7 | -14.2   | -14.6 | -11.1 | -13.1   | -12.8 |
| Dimer AcOH-Uracil_1.z.-30      | -11.9 <sup>a</sup> | -9.6  | -10.8   | -10.9 | -8.5  | -9.9    | -9.9  |
| Dimer AcOH-Uracil_1.z.+30      | -10.3 <sup>a</sup> | -6.4  | -7.5    | -7.7  | -5.8  | -7.2    | -6.8  |
| Dimer AcOH-Uracil_2.y.-30      | -17.2 <sup>a</sup> | -13.4 | -15.0   | -15.5 | -12.0 | -14.1   | -13.5 |
| Dimer AcOH-Uracil_2.y.+30      | -17.2 <sup>a</sup> | -13.4 | -15.0   | -15.5 | -12.0 | -14.1   | -13.5 |
| Dimer AcOH-Uracil_2.z.-30      | -11.4 <sup>a</sup> | -9.0  | -10.0   | -9.9  | -8.4  | -9.7    | -8.9  |
| Dimer AcOH-Uracil_2.z.+30      | -9.7 <sup>a</sup>  | -7.2  | -8.5    | -8.8  | -5.7  | -7.4    | -7.2  |
| Dimer AcNH2-Uracil_1.y.-30     | -17.3 <sup>a</sup> | -14.3 | -16.0   | -16.1 | -13.2 | -15.4   | -15.2 |
| Dimer AcNH2-Uracil_1.y.+30     | -17.2 <sup>a</sup> | -14.1 | -15.8   | -15.9 | -13.0 | -15.2   | -15.0 |
| Dimer AcNH2-Uracil_1.z.-30     | -13.8 <sup>a</sup> | -11.6 | -12.9   | -12.8 | -11.0 | -12.5   | -12.4 |
| Dimer AcNH2-Uracil_1.z.+30     | -10.1 <sup>a</sup> | -7.8  | -9.0    | -9.0  | -7.2  | -8.7    | -8.4  |
| Dimer AcNH2-Uracil_2.y.-30     | -16.3 <sup>a</sup> | -13.6 | -15.3   | -15.4 | -12.5 | -14.7   | -14.3 |
| Dimer AcNH2-Uracil_2.y.+30     | -16.3 <sup>a</sup> | -13.6 | -15.3   | -15.4 | -12.5 | -14.7   | -14.3 |
| Dimer AcNH2-Uracil_2.z.-30     | -10.2 <sup>a</sup> | -8.6  | -9.7    | -9.5  | -8.0  | -9.3    | -9.0  |
| Dimer AcNH2-Uracil_2.z.+30     | -11.2 <sup>a</sup> | -9.2  | -10.7   | -10.8 | -8.4  | -10.2   | -9.6  |
| Dimer Uracil-Uracil_BP_1.y.-30 | -15.3 <sup>a</sup> | -12.0 | -13.9   | -14.0 | -11.0 | -13.4   | -13.2 |
| Dimer Uracil-Uracil_BP_1.y.+30 | -15.3 <sup>a</sup> | -12.0 | -13.9   | -14.0 | -11.0 | -13.4   | -13.2 |
| Dimer Uracil-Uracil_BP_1.z.-30 | -8.2 <sup>a</sup>  | -5.1  | -6.5    | -6.6  | -4.6  | -6.3    | -6.3  |
| Dimer Uracil-Uracil_BP_1.z.+30 | -11.5 <sup>a</sup> | -9.5  | -10.8   | -10.7 | -9.0  | -10.6   | -10.4 |
| Dimer Uracil-Uracil_BP_2.y.-30 | -14.9 <sup>a</sup> | -11.9 | -13.8   | -13.9 | -10.8 | -13.2   | -13.0 |
| Dimer Uracil-Uracil_BP_2.y.+30 | -14.9 <sup>a</sup> | -11.9 | -13.8   | -13.9 | -10.8 | -13.2   | -13.0 |
| Dimer Uracil-Uracil_BP_2.z.-30 | -9.6 <sup>a</sup>  | -7.5  | -9.0    | -9.2  | -6.8  | -8.8    | -8.4  |
| Dimer Uracil-Uracil_BP_2.z.+30 | -9.6 <sup>a</sup>  | -7.7  | -9.0    | -8.7  | -6.9  | -8.5    | -8.2  |
| Dimer Benzene-Ethene_1.y.-30   | -0.7 <sup>a</sup>  | 0.7   | -0.5    | -0.6  | 0.5   | -0.8    | -0.9  |
| Dimer Benzene-Ethene_1.y.+30   | -0.7 <sup>a</sup>  | 0.7   | -0.5    | -0.6  | 0.5   | -0.8    | -0.9  |
| Dimer Benzene-Ethene_1.z.-30   | -0.7 <sup>a</sup>  | 0.7   | -0.5    | -0.6  | 0.5   | -0.8    | -0.9  |
| Dimer Benzene-Ethene_1.z.+30   | -0.7 <sup>a</sup>  | 0.7   | -0.5    | -0.6  | 0.5   | -0.8    | -0.9  |
| Dimer Benzene-Ethene_2.y.-30   | -1.5 <sup>a</sup>  | 0.7   | -1.1    | -1.3  | 0.6   | -1.6    | -1.6  |
| Dimer Benzene-Ethene_2.y.+30   | -1.5 <sup>a</sup>  | 0.7   | -1.1    | -1.3  | 0.6   | -1.6    | -1.6  |
| Dimer Benzene-Ethene_2.z.-30   | -1.3 <sup>a</sup>  | 0.6   | -0.9    | -1.1  | 0.5   | -1.3    | -1.4  |
| Dimer Benzene-Ethene_2.z.+30   | -1.3 <sup>a</sup>  | 0.6   | -0.9    | -1.1  | 0.5   | -1.3    | -1.4  |
| Dimer Pyridine-Ethene_1.y.-30  | -1.0 <sup>a</sup>  | 0.4   | -0.8    | -0.9  | 0.3   | -1.1    | -1.2  |
| Dimer Pyridine-Ethene_1.y.+30  | -1.0 <sup>a</sup>  | 0.4   | -0.8    | -0.9  | 0.3   | -1.1    | -1.2  |

... continued on next page ...

Table S78: ... continued from previous page ...

| Species                               | Ref.              | OM2  | OM2-D3T | ODM2 | OM3  | OM3-D3T | ODM3 |
|---------------------------------------|-------------------|------|---------|------|------|---------|------|
| Dimer Pyridine-Ethene_1.z.-30         | -1.0 <sup>a</sup> | 0.5  | -0.8    | -1.0 | 0.3  | -1.1    | -1.2 |
| Dimer Pyridine-Ethene_1.z.+30         | -1.1 <sup>a</sup> | 0.4  | -0.9    | -1.0 | 0.2  | -1.2    | -1.3 |
| Dimer Pyridine-Ethene_2.y.-30         | -1.6 <sup>a</sup> | 0.3  | -1.3    | -1.5 | 0.2  | -1.6    | -1.7 |
| Dimer Pyridine-Ethene_2.y.+30         | -1.6 <sup>a</sup> | 0.3  | -1.3    | -1.5 | 0.2  | -1.6    | -1.7 |
| Dimer Pyridine-Ethene_2.z.-30         | -1.8 <sup>a</sup> | 0.2  | -1.6    | -1.7 | 0.2  | -1.9    | -1.9 |
| Dimer Pyridine-Ethene_2.z.+30         | -1.6 <sup>a</sup> | 0.6  | -1.3    | -1.5 | 0.5  | -1.8    | -1.9 |
| Dimer Uracil-Ethene_1.y.-30           | -2.4 <sup>a</sup> | -1.0 | -2.3    | -2.4 | -0.8 | -2.4    | -2.3 |
| Dimer Uracil-Ethene_1.y.+30           | -2.3 <sup>a</sup> | -0.8 | -2.2    | -2.3 | -0.6 | -2.3    | -2.3 |
| Dimer Uracil-Ethene_1.z.-30           | -2.7 <sup>a</sup> | -0.8 | -2.5    | -2.6 | -0.7 | -2.7    | -2.6 |
| Dimer Uracil-Ethene_1.z.+30           | -2.1 <sup>a</sup> | -0.5 | -2.0    | -2.2 | -0.5 | -2.3    | -2.2 |
| Dimer Uracil-Ethene_2.y.-30           | -2.4 <sup>a</sup> | -0.4 | -2.1    | -2.3 | -0.2 | -2.3    | -2.2 |
| Dimer Uracil-Ethene_2.y.+30           | -2.4 <sup>a</sup> | -0.4 | -2.1    | -2.3 | -0.3 | -2.4    | -2.3 |
| Dimer Uracil-Ethene_2.z.-30           | -3.0 <sup>a</sup> | -0.6 | -2.7    | -3.0 | -0.6 | -3.1    | -3.0 |
| Dimer Uracil-Ethene_2.z.+30           | -2.9 <sup>a</sup> | -0.7 | -2.7    | -2.8 | -0.4 | -2.8    | -2.7 |
| Dimer Uracil-Ethyne_1.y.-30           | -2.5 <sup>a</sup> | -1.0 | -2.4    | -2.5 | -1.0 | -2.7    | -2.5 |
| Dimer Uracil-Ethyne_1.y.+30           | -3.1 <sup>a</sup> | -1.6 | -3.1    | -3.2 | -1.4 | -3.3    | -3.0 |
| Dimer Uracil-Ethyne_1.z.-30           | -3.0 <sup>a</sup> | -2.0 | -3.0    | -3.1 | -1.7 | -3.0    | -2.8 |
| Dimer Uracil-Ethyne_1.z.+30           | -2.1 <sup>a</sup> | -0.6 | -2.0    | -2.1 | -0.5 | -2.2    | -2.1 |
| Dimer Uracil-Ethyne_2.y.-30           | -3.7 <sup>a</sup> | -1.7 | -3.6    | -3.8 | -1.5 | -3.9    | -3.6 |
| Dimer Uracil-Ethyne_2.y.+30           | -3.7 <sup>a</sup> | -1.7 | -3.6    | -3.8 | -1.5 | -3.9    | -3.5 |
| Dimer Uracil-Ethyne_2.z.-30           | -2.9 <sup>a</sup> | -1.0 | -2.8    | -2.9 | -0.9 | -3.1    | -2.8 |
| Dimer Uracil-Ethyne_2.z.+30           | -2.8 <sup>a</sup> | -1.1 | -2.6    | -2.7 | -0.7 | -2.5    | -2.3 |
| Dimer Benzene-Benzene_pi-pi_1.y.-30   | -1.8 <sup>a</sup> | 1.1  | -1.4    | -1.7 | 0.9  | -2.0    | -2.2 |
| Dimer Benzene-Benzene_pi-pi_1.y.+30   | -2.1 <sup>a</sup> | 0.6  | -1.9    | -2.1 | 0.6  | -2.3    | -2.4 |
| Dimer Benzene-Benzene_pi-pi_1.z.-30   | -2.5 <sup>a</sup> | 0.4  | -2.2    | -2.5 | 0.5  | -2.6    | -2.7 |
| Dimer Benzene-Benzene_pi-pi_1.z.+30   | -1.7 <sup>a</sup> | 1.2  | -1.1    | -1.4 | 1.0  | -1.8    | -1.9 |
| Dimer Benzene-Benzene_pi-pi_2.y.-30   | -2.1 <sup>a</sup> | 0.4  | -2.0    | -2.2 | 0.5  | -2.4    | -2.4 |
| Dimer Benzene-Benzene_pi-pi_2.y.+30   | -1.8 <sup>a</sup> | 1.1  | -1.4    | -1.7 | 0.9  | -2.0    | -2.2 |
| Dimer Benzene-Benzene_pi-pi_2.z.-30   | -2.4 <sup>a</sup> | 0.1  | -2.4    | -2.5 | 0.3  | -2.6    | -2.7 |
| Dimer Benzene-Benzene_pi-pi_2.z.+30   | -1.6 <sup>a</sup> | 1.3  | -1.1    | -1.4 | 1.1  | -1.7    | -1.9 |
| Dimer Pyridine-Pyridine_pi-pi_1.y.-30 | -2.6 <sup>a</sup> | 0.1  | -2.7    | -3.0 | 0.2  | -3.1    | -3.2 |
| Dimer Pyridine-Pyridine_pi-pi_1.y.+30 | -2.9 <sup>a</sup> | -0.5 | -2.9    | -3.3 | -0.3 | -3.2    | -3.4 |
| Dimer Pyridine-Pyridine_pi-pi_1.z.-30 | -2.7 <sup>a</sup> | 0.0  | -2.5    | -2.9 | -0.1 | -3.0    | -3.2 |
| Dimer Pyridine-Pyridine_pi-pi_1.z.+30 | -3.1 <sup>a</sup> | -0.5 | -3.1    | -3.4 | -0.2 | -3.3    | -3.4 |
| Dimer Pyridine-Pyridine_pi-pi_2.y.-30 | -2.5 <sup>a</sup> | 0.2  | -2.5    | -2.9 | 0.2  | -3.0    | -3.1 |
| Dimer Pyridine-Pyridine_pi-pi_2.y.+30 | -2.9 <sup>a</sup> | -0.5 | -3.0    | -3.3 | -0.2 | -3.2    | -3.4 |
| Dimer Pyridine-Pyridine_pi-pi_2.z.-30 | -2.5 <sup>a</sup> | 0.0  | -2.4    | -2.8 | -0.1 | -3.0    | -3.2 |
| Dimer Pyridine-Pyridine_pi-pi_2.z.+30 | -2.8 <sup>a</sup> | -0.5 | -3.0    | -3.3 | -0.2 | -3.2    | -3.3 |
| Dimer Benzene-Pyridine_pi-pi_1.y.-30  | -2.4 <sup>a</sup> | 0.4  | -2.2    | -2.5 | 0.4  | -2.7    | -2.8 |
| Dimer Benzene-Pyridine_pi-pi_1.y.+30  | -2.4 <sup>a</sup> | 0.3  | -2.2    | -2.5 | 0.3  | -2.6    | -2.8 |
| Dimer Benzene-Pyridine_pi-pi_1.z.-30  | -2.0 <sup>a</sup> | 0.8  | -1.6    | -1.9 | 0.6  | -2.2    | -2.4 |
| Dimer Benzene-Pyridine_pi-pi_1.z.+30  | -2.8 <sup>a</sup> | -0.2 | -2.7    | -3.0 | 0.0  | -3.0    | -3.1 |
| Dimer Benzene-Pyridine_pi-pi_2.y.-30  | -2.3 <sup>a</sup> | 0.5  | -2.2    | -2.5 | 0.5  | -2.7    | -2.9 |
| Dimer Benzene-Pyridine_pi-pi_2.y.+30  | -2.6 <sup>a</sup> | -0.2 | -2.6    | -2.8 | 0.0  | -2.8    | -2.9 |
| Dimer Benzene-Pyridine_pi-pi_2.z.-30  | -2.1 <sup>a</sup> | 0.7  | -1.8    | -2.1 | 0.4  | -2.4    | -2.5 |
| Dimer Benzene-Pyridine_pi-pi_2.z.+30  | -2.9 <sup>a</sup> | -0.3 | -2.9    | -3.1 | -0.0 | -3.2    | -3.2 |
| Dimer Benzene-Uracil_pi-pi_1.y.-30    | -4.0 <sup>a</sup> | -0.9 | -3.8    | -4.0 | -0.6 | -4.2    | -4.0 |
| Dimer Benzene-Uracil_pi-pi_1.y.+30    | -4.1 <sup>a</sup> | -1.1 | -4.1    | -4.3 | -0.9 | -4.4    | -4.2 |
| Dimer Benzene-Uracil_pi-pi_1.z.-30    | -4.2 <sup>a</sup> | -1.3 | -4.2    | -4.4 | -1.0 | -4.5    | -4.2 |
| Dimer Benzene-Uracil_pi-pi_1.z.+30    | -3.8 <sup>a</sup> | -0.3 | -3.5    | -3.8 | -0.1 | -4.0    | -3.8 |
| Dimer Benzene-Uracil_pi-pi_2.y.-30    | -2.2 <sup>a</sup> | 0.3  | -1.9    | -2.1 | 0.2  | -2.3    | -2.3 |
| Dimer Benzene-Uracil_pi-pi_2.y.+30    | -2.4 <sup>a</sup> | 0.3  | -2.0    | -2.2 | 0.3  | -2.4    | -2.5 |
| Dimer Benzene-Uracil_pi-pi_2.z.-30    | -3.0 <sup>a</sup> | -0.2 | -3.0    | -3.2 | -0.2 | -3.5    | -3.4 |
| Dimer Benzene-Uracil_pi-pi_2.z.+30    | -5.2 <sup>a</sup> | -1.6 | -5.0    | -5.1 | -1.0 | -5.1    | -4.8 |
| Dimer Pyridine-Uracil_pi-pi_1.y.-30   | -4.8 <sup>a</sup> | -2.0 | -4.8    | -5.2 | -1.7 | -5.1    | -5.1 |
| Dimer Pyridine-Uracil_pi-pi_1.y.+30   | -4.6 <sup>a</sup> | -1.9 | -4.8    | -5.0 | -1.7 | -5.1    | -5.0 |
| Dimer Pyridine-Uracil_pi-pi_1.z.-30   | -4.8 <sup>a</sup> | -1.9 | -5.0    | -5.3 | -1.6 | -5.3    | -5.2 |
| Dimer Pyridine-Uracil_pi-pi_1.z.+30   | -5.9 <sup>a</sup> | -2.4 | -5.5    | -6.1 | -2.5 | -6.2    | -6.2 |
| Dimer Pyridine-Uracil_pi-pi_2.y.-30   | -3.5 <sup>a</sup> | -1.2 | -3.2    | -3.6 | -1.2 | -3.6    | -3.8 |
| Dimer Pyridine-Uracil_pi-pi_2.y.+30   | -3.9 <sup>a</sup> | -1.1 | -3.8    | -4.2 | -1.1 | -4.3    | -4.4 |
| Dimer Pyridine-Uracil_pi-pi_2.z.-30   | -5.4 <sup>a</sup> | -2.6 | -5.4    | -5.9 | -2.5 | -5.9    | -6.0 |
| Dimer Pyridine-Uracil_pi-pi_2.z.+30   | -4.7 <sup>a</sup> | -1.7 | -4.7    | -5.1 | -1.4 | -5.0    | -5.0 |
| Dimer Uracil-Uracil_pi-pi_1.y.-30     | -8.3 <sup>a</sup> | -4.0 | -7.4    | -7.5 | -3.6 | -7.7    | -7.3 |
| Dimer Uracil-Uracil_pi-pi_1.y.+30     | -7.4 <sup>a</sup> | -3.6 | -7.3    | -7.3 | -3.4 | -7.8    | -7.6 |
| Dimer Uracil-Uracil_pi-pi_1.z.-30     | -6.8 <sup>a</sup> | -3.6 | -6.2    | -6.2 | -3.2 | -6.4    | -6.3 |

... continued on next page ...

Table S78: ... continued from previous page ...

| Species                                 | Ref.              | OM2  | OM2-D3T | ODM2 | OM3  | OM3-D3T | ODM3 |
|-----------------------------------------|-------------------|------|---------|------|------|---------|------|
| Dimer Uracil-Uracil_pi-pi_1.z.+30       | -6.7 <sup>a</sup> | -3.6 | -6.9    | -7.0 | -3.9 | -7.8    | -7.4 |
| Dimer Uracil-Uracil_pi-pi_2.y.-30       | -6.3 <sup>a</sup> | -3.2 | -5.9    | -5.9 | -2.9 | -6.2    | -6.1 |
| Dimer Uracil-Uracil_pi-pi_2.y.+30       | -6.4 <sup>a</sup> | -3.6 | -6.5    | -6.6 | -3.9 | -7.4    | -6.9 |
| Dimer Uracil-Uracil_pi-pi_2.z.-30       | -6.8 <sup>a</sup> | -3.2 | -6.9    | -6.9 | -3.0 | -7.5    | -7.3 |
| Dimer Uracil-Uracil_pi-pi_2.z.+30       | -7.9 <sup>a</sup> | -3.4 | -6.9    | -7.0 | -2.7 | -7.0    | -6.6 |
| Dimer Pentane-Pentane_1.y.-30           | -1.7 <sup>a</sup> | -0.1 | -1.7    | -1.7 | 0.3  | -1.6    | -1.5 |
| Dimer Pentane-Pentane_1.y.+30           | -1.7 <sup>a</sup> | -0.1 | -1.7    | -1.7 | 0.3  | -1.6    | -1.5 |
| Dimer Pentane-Pentane_1.z.-30           | -2.9 <sup>a</sup> | -0.4 | -3.1    | -3.0 | 0.4  | -2.8    | -2.6 |
| Dimer Pentane-Pentane_1.z.+30           | -2.6 <sup>a</sup> | -0.4 | -3.1    | -3.0 | 0.4  | -2.7    | -2.5 |
| Dimer Pentane-Pentane_2.y.-30           | -1.6 <sup>a</sup> | -0.1 | -1.7    | -1.7 | 0.2  | -1.6    | -1.5 |
| Dimer Pentane-Pentane_2.y.+30           | -1.6 <sup>a</sup> | -0.1 | -1.7    | -1.7 | 0.2  | -1.6    | -1.5 |
| Dimer Pentane-Pentane_2.z.-30           | -2.7 <sup>a</sup> | -0.4 | -3.0    | -2.9 | 0.4  | -2.7    | -2.5 |
| Dimer Pentane-Pentane_2.z.+30           | -2.7 <sup>a</sup> | -0.4 | -3.1    | -3.0 | 0.5  | -2.7    | -2.5 |
| Dimer Neopentane-Pentane_1.y.-30        | -1.2 <sup>a</sup> | -0.2 | -1.4    | -1.4 | 0.1  | -1.3    | -1.3 |
| Dimer Neopentane-Pentane_1.y.+30        | -1.2 <sup>a</sup> | -0.2 | -1.4    | -1.4 | 0.1  | -1.3    | -1.3 |
| Dimer Neopentane-Pentane_1.z.-30        | -1.8 <sup>a</sup> | -0.4 | -2.2    | -2.1 | 0.0  | -1.9    | -1.9 |
| Dimer Neopentane-Pentane_1.z.+30        | -1.6 <sup>a</sup> | -0.4 | -2.0    | -2.0 | -0.0 | -1.8    | -1.8 |
| Dimer Neopentane-Pentane_2.y.-30        | -1.9 <sup>a</sup> | -0.2 | -2.0    | -2.0 | 0.2  | -1.9    | -1.8 |
| Dimer Neopentane-Pentane_2.y.+30        | -1.9 <sup>a</sup> | -0.2 | -2.0    | -2.0 | 0.2  | -1.9    | -1.8 |
| Dimer Neopentane-Pentane_2.z.-30        | -1.8 <sup>a</sup> | -0.2 | -2.0    | -1.9 | 0.2  | -1.8    | -1.7 |
| Dimer Neopentane-Pentane_2.z.+30        | -2.0 <sup>a</sup> | -0.3 | -2.3    | -2.3 | 0.2  | -2.1    | -2.0 |
| Dimer Neopentane-Neopentane_1.y.-30     | -1.3 <sup>a</sup> | -0.3 | -1.6    | -1.5 | 0.0  | -1.4    | -1.4 |
| Dimer Neopentane-Neopentane_1.y.+30     | -1.3 <sup>a</sup> | -0.3 | -1.6    | -1.5 | 0.0  | -1.4    | -1.4 |
| Dimer Neopentane-Neopentane_1.z.-30     | -1.2 <sup>a</sup> | -0.3 | -1.5    | -1.5 | 0.0  | -1.4    | -1.3 |
| Dimer Neopentane-Neopentane_1.z.+30     | -1.4 <sup>a</sup> | -0.3 | -1.7    | -1.7 | -0.0 | -1.5    | -1.5 |
| Dimer Neopentane-Neopentane_2.y.-30     | -1.2 <sup>a</sup> | -0.3 | -1.5    | -1.5 | 0.0  | -1.4    | -1.4 |
| Dimer Neopentane-Neopentane_2.y.+30     | -1.2 <sup>a</sup> | -0.3 | -1.5    | -1.5 | 0.0  | -1.4    | -1.4 |
| Dimer Neopentane-Neopentane_2.z.-30     | -1.2 <sup>a</sup> | -0.2 | -1.5    | -1.5 | 0.1  | -1.4    | -1.3 |
| Dimer Neopentane-Neopentane_2.z.+30     | -1.3 <sup>a</sup> | -0.3 | -1.6    | -1.6 | -0.0 | -1.5    | -1.5 |
| Dimer Cyclopentane-Neopentane_1.y.-30   | -1.8 <sup>a</sup> | -0.4 | -2.1    | -2.0 | 0.1  | -1.8    | -1.8 |
| Dimer Cyclopentane-Neopentane_1.y.+30   | -1.8 <sup>a</sup> | -0.4 | -2.2    | -2.1 | 0.1  | -1.9    | -1.8 |
| Dimer Cyclopentane-Neopentane_1.z.-30   | -1.6 <sup>a</sup> | -0.4 | -1.9    | -1.9 | -0.0 | -1.7    | -1.7 |
| Dimer Cyclopentane-Neopentane_1.z.+30   | -1.3 <sup>a</sup> | -0.3 | -1.7    | -1.6 | 0.0  | -1.5    | -1.5 |
| Dimer Cyclopentane-Neopentane_2.y.-30   | -1.4 <sup>a</sup> | -0.3 | -1.8    | -1.7 | 0.1  | -1.6    | -1.6 |
| Dimer Cyclopentane-Neopentane_2.y.+30   | -1.4 <sup>a</sup> | -0.3 | -1.8    | -1.7 | 0.1  | -1.6    | -1.6 |
| Dimer Cyclopentane-Neopentane_2.z.-30   | -1.8 <sup>a</sup> | -0.4 | -2.1    | -2.1 | 0.1  | -1.9    | -1.9 |
| Dimer Cyclopentane-Neopentane_2.z.+30   | -1.6 <sup>a</sup> | -0.3 | -1.8    | -1.8 | 0.1  | -1.6    | -1.6 |
| Dimer Cyclopentane-Cyclopentane_1.y.-30 | -1.9 <sup>a</sup> | -0.3 | -2.1    | -2.0 | 0.3  | -1.8    | -1.7 |
| Dimer Cyclopentane-Cyclopentane_1.y.+30 | -1.8 <sup>a</sup> | -0.2 | -2.0    | -1.9 | 0.4  | -1.8    | -1.6 |
| Dimer Cyclopentane-Cyclopentane_1.z.-30 | -1.8 <sup>a</sup> | -0.4 | -2.3    | -2.2 | 0.2  | -2.0    | -1.9 |
| Dimer Cyclopentane-Cyclopentane_1.z.+30 | -1.8 <sup>a</sup> | -0.3 | -2.1    | -2.1 | 0.2  | -1.9    | -1.8 |
| Dimer Cyclopentane-Cyclopentane_2.y.-30 | -1.9 <sup>a</sup> | -0.4 | -2.2    | -2.2 | 0.1  | -2.0    | -1.9 |
| Dimer Cyclopentane-Cyclopentane_2.y.+30 | -2.0 <sup>a</sup> | -0.5 | -2.5    | -2.4 | 0.1  | -2.2    | -2.1 |
| Dimer Cyclopentane-Cyclopentane_2.z.-30 | -1.9 <sup>a</sup> | -0.4 | -2.2    | -2.1 | 0.2  | -1.9    | -1.8 |
| Dimer Ethene-Pentane_1.y.-30            | -1.9 <sup>a</sup> | 0.1  | -1.6    | -1.7 | 0.4  | -1.7    | -1.6 |
| Dimer Ethene-Pentane_1.y.+30            | -1.9 <sup>a</sup> | -0.4 | -2.1    | -2.0 | 0.2  | -1.9    | -1.7 |
| Dimer Ethene-Pentane_1.z.-30            | -1.4 <sup>a</sup> | -0.2 | -1.6    | -1.5 | 0.2  | -1.4    | -1.3 |
| Dimer Ethene-Pentane_1.z.+30            | -1.4 <sup>a</sup> | -0.2 | -1.6    | -1.5 | 0.2  | -1.4    | -1.3 |
| Dimer Ethene-Pentane_2.y.-30            | -1.0 <sup>a</sup> | -0.3 | -1.3    | -1.3 | -0.0 | -1.2    | -1.2 |
| Dimer Ethene-Pentane_2.y.+30            | -1.2 <sup>a</sup> | -0.2 | -1.4    | -1.4 | 0.2  | -1.2    | -1.2 |
| Dimer Ethene-Pentane_2.z.-30            | -0.8 <sup>a</sup> | -0.1 | -1.0    | -1.0 | 0.1  | -0.9    | -0.8 |
| Dimer Ethene-Pentane_2.z.+30            | -0.8 <sup>a</sup> | -0.1 | -1.0    | -1.0 | 0.1  | -0.9    | -0.9 |
| Dimer Ethyne-Pentane_1.y.-30            | -1.8 <sup>a</sup> | 0.1  | -1.5    | -1.5 | 0.3  | -1.6    | -1.6 |
| Dimer Ethyne-Pentane_1.y.+30            | -1.8 <sup>a</sup> | 0.1  | -1.5    | -1.5 | 0.3  | -1.6    | -1.6 |
| Dimer Ethyne-Pentane_1.z.-30            | -1.6 <sup>a</sup> | -0.2 | -1.5    | -1.5 | 0.2  | -1.4    | -1.3 |
| Dimer Ethyne-Pentane_1.z.+30            | -1.6 <sup>a</sup> | -0.2 | -1.5    | -1.5 | 0.2  | -1.4    | -1.3 |
| Dimer Ethyne-Pentane_2.y.-30            | -1.1 <sup>a</sup> | 0.1  | -0.9    | -1.0 | 0.2  | -1.0    | -1.0 |
| Dimer Ethyne-Pentane_2.y.+30            | -1.1 <sup>a</sup> | -0.1 | -1.0    | -1.0 | 0.1  | -1.0    | -1.0 |
| Dimer Ethyne-Pentane_2.z.-30            | -1.2 <sup>a</sup> | 0.1  | -0.9    | -1.0 | 0.2  | -1.0    | -0.9 |
| Dimer Ethyne-Pentane_2.z.+30            | -1.2 <sup>a</sup> | 0.1  | -0.9    | -1.0 | 0.2  | -1.0    | -0.9 |
| Dimer Peptide-Pentane_1.y.-30           | -1.8 <sup>a</sup> | -0.1 | -1.6    | -1.5 | 0.3  | -1.4    | -1.2 |
| Dimer Peptide-Pentane_1.y.+30           | -2.4 <sup>a</sup> | -0.5 | -2.5    | -2.4 | 0.1  | -2.2    | -2.0 |
| Dimer Peptide-Pentane_1.z.-30           | -3.0 <sup>a</sup> | -0.2 | -2.9    | -2.9 | 0.4  | -2.8    | -2.7 |
| Dimer Peptide-Pentane_1.z.+30           | -3.2 <sup>a</sup> | -0.4 | -2.7    | -2.8 | 0.0  | -2.7    | -2.6 |

... continued on next page ...

Table S78: ... continued from previous page ...

| Species                            | Ref.              | OM2  | OM2-D3T | ODM2 | OM3  | OM3-D3T | ODM3 |
|------------------------------------|-------------------|------|---------|------|------|---------|------|
| Dimer Peptide-Pentane.2.y.-30      | -1.9 <sup>a</sup> | -0.1 | -1.7    | -1.8 | 0.2  | -1.7    | -1.7 |
| Dimer Peptide-Pentane.2.y.+30      | -1.6 <sup>a</sup> | -0.3 | -1.6    | -1.6 | 0.0  | -1.4    | -1.4 |
| Dimer Peptide-Pentane.2.z.-30      | -2.6 <sup>a</sup> | -0.4 | -2.6    | -2.7 | 0.1  | -2.6    | -2.5 |
| Dimer Peptide-Pentane.2.z.+30      | -2.6 <sup>a</sup> | -0.1 | -2.4    | -2.4 | 0.4  | -2.2    | -2.1 |
| Dimer Benzene-Cyclopentane.1.y.-30 | -2.6 <sup>a</sup> | 0.1  | -2.3    | -2.3 | 0.5  | -2.3    | -2.2 |
| Dimer Benzene-Cyclopentane.1.y.+30 | -2.4 <sup>a</sup> | 0.0  | -2.2    | -2.3 | 0.4  | -2.2    | -2.2 |
| Dimer Benzene-Cyclopentane.1.z.-30 | -2.1 <sup>a</sup> | 0.1  | -1.9    | -2.0 | 0.3  | -2.0    | -2.0 |
| Dimer Benzene-Cyclopentane.1.z.+30 | -2.4 <sup>a</sup> | 0.0  | -2.3    | -2.3 | 0.5  | -2.2    | -2.1 |
| Dimer Benzene-Cyclopentane.2.y.-30 | -2.3 <sup>a</sup> | 0.0  | -2.1    | -2.1 | 0.4  | -2.1    | -2.1 |
| Dimer Benzene-Cyclopentane.2.y.+30 | -2.5 <sup>a</sup> | 0.0  | -2.4    | -2.4 | 0.4  | -2.4    | -2.4 |
| Dimer Benzene-Cyclopentane.2.z.-30 | -2.2 <sup>a</sup> | 0.0  | -2.0    | -2.0 | 0.4  | -2.0    | -1.9 |
| Dimer Benzene-Cyclopentane.2.z.+30 | -2.1 <sup>a</sup> | 0.1  | -2.1    | -2.1 | 0.4  | -2.1    | -2.1 |
| Dimer Benzene-Neopentane.1.y.-30   | -2.0 <sup>a</sup> | -0.2 | -2.0    | -2.1 | 0.1  | -2.0    | -2.0 |
| Dimer Benzene-Neopentane.1.y.+30   | -2.0 <sup>a</sup> | -0.2 | -2.0    | -2.1 | 0.1  | -2.0    | -2.0 |
| Dimer Benzene-Neopentane.1.z.-30   | -1.7 <sup>a</sup> | -0.2 | -1.8    | -1.8 | 0.0  | -1.8    | -1.8 |
| Dimer Benzene-Neopentane.1.z.+30   | -2.1 <sup>a</sup> | -0.2 | -2.2    | -2.2 | 0.2  | -2.1    | -2.1 |
| Dimer Benzene-Neopentane.2.y.-30   | -2.3 <sup>a</sup> | -0.1 | -2.2    | -2.3 | 0.2  | -2.3    | -2.3 |
| Dimer Benzene-Neopentane.2.y.+30   | -2.3 <sup>a</sup> | -0.1 | -2.2    | -2.3 | 0.2  | -2.3    | -2.3 |
| Dimer Benzene-Neopentane.2.z.-30   | -2.2 <sup>a</sup> | -0.3 | -2.2    | -2.2 | 0.0  | -2.2    | -2.2 |
| Dimer Benzene-Neopentane.2.z.+30   | -2.2 <sup>a</sup> | 0.1  | -2.0    | -2.1 | 0.4  | -2.1    | -2.1 |
| Dimer Uracil-Pentane.1.y.-30       | -2.8 <sup>a</sup> | -0.6 | -2.9    | -3.0 | -0.4 | -3.1    | -3.0 |
| Dimer Uracil-Pentane.1.y.+30       | -3.1 <sup>a</sup> | -0.6 | -3.3    | -3.3 | -0.1 | -3.3    | -3.0 |
| Dimer Uracil-Pentane.1.z.-30       | -2.9 <sup>a</sup> | -0.4 | -3.0    | -3.1 | -0.2 | -3.2    | -3.2 |
| Dimer Uracil-Pentane.1.z.+30       | -3.0 <sup>a</sup> | -0.6 | -2.9    | -3.0 | -0.4 | -3.0    | -3.0 |
| Dimer Uracil-Pentane.2.y.-30       | -2.0 <sup>a</sup> | -0.1 | -2.0    | -2.1 | -0.0 | -2.2    | -2.1 |
| Dimer Uracil-Pentane.2.y.+30       | -2.3 <sup>a</sup> | -0.2 | -2.1    | -2.2 | 0.0  | -2.2    | -2.1 |
| Dimer Uracil-Pentane.2.z.-30       | -2.7 <sup>a</sup> | -0.2 | -2.7    | -2.8 | 0.0  | -2.9    | -2.9 |
| Dimer Uracil-Pentane.2.z.+30       | -3.1 <sup>a</sup> | 0.1  | -2.8    | -3.0 | 0.4  | -3.0    | -3.0 |
| Dimer Uracil-Cyclopentane.1.y.-30  | -2.6 <sup>a</sup> | -0.3 | -2.3    | -2.4 | -0.1 | -2.5    | -2.5 |
| Dimer Uracil-Cyclopentane.1.y.+30  | -2.6 <sup>a</sup> | -0.3 | -2.3    | -2.5 | -0.1 | -2.5    | -2.5 |
| Dimer Uracil-Cyclopentane.1.z.-30  | -2.4 <sup>a</sup> | -0.2 | -2.4    | -2.5 | 0.0  | -2.5    | -2.5 |
| Dimer Uracil-Cyclopentane.1.z.+30  | -3.4 <sup>a</sup> | -0.5 | -3.3    | -3.3 | 0.0  | -3.3    | -3.1 |
| Dimer Uracil-Cyclopentane.2.y.-30  | -2.5 <sup>a</sup> | -0.0 | -2.3    | -2.4 | 0.2  | -2.5    | -2.4 |
| Dimer Uracil-Cyclopentane.2.y.+30  | -2.8 <sup>a</sup> | 0.0  | -2.5    | -2.6 | 0.3  | -2.7    | -2.7 |
| Dimer Uracil-Cyclopentane.2.z.-30  | -2.5 <sup>a</sup> | -0.2 | -2.4    | -2.4 | -0.0 | -2.5    | -2.4 |
| Dimer Uracil-Cyclopentane.2.z.+30  | -2.7 <sup>a</sup> | -0.1 | -2.4    | -2.5 | 0.2  | -2.6    | -2.6 |
| Dimer Uracil-Neopentane.1.y.-30    | -2.5 <sup>a</sup> | -0.4 | -2.2    | -2.3 | -0.2 | -2.3    | -2.3 |
| Dimer Uracil-Neopentane.1.y.+30    | -2.8 <sup>a</sup> | -0.4 | -2.4    | -2.5 | -0.2 | -2.5    | -2.5 |
| Dimer Uracil-Neopentane.1.z.-30    | -2.2 <sup>a</sup> | -0.3 | -2.1    | -2.1 | -0.1 | -2.2    | -2.2 |
| Dimer Uracil-Neopentane.1.z.+30    | -3.2 <sup>a</sup> | -0.6 | -2.9    | -2.9 | -0.1 | -2.8    | -2.6 |
| Dimer Uracil-Neopentane.2.y.-30    | -2.3 <sup>a</sup> | 0.1  | -2.0    | -2.1 | 0.3  | -2.2    | -2.1 |
| Dimer Uracil-Neopentane.2.y.+30    | -2.6 <sup>a</sup> | -0.0 | -2.4    | -2.5 | 0.2  | -2.5    | -2.5 |
| Dimer Uracil-Neopentane.2.z.-30    | -2.1 <sup>a</sup> | -0.2 | -1.9    | -2.0 | -0.0 | -2.1    | -2.0 |
| Dimer Uracil-Neopentane.2.z.+30    | -2.2 <sup>a</sup> | -0.2 | -2.0    | -2.1 | -0.0 | -2.1    | -2.1 |
| Dimer Ethyne-Ethyne.TS.1.y.-30     | -1.5 <sup>a</sup> | -1.1 | -1.7    | -1.6 | -0.7 | -1.3    | -1.2 |
| Dimer Ethyne-Ethyne.TS.1.y.+30     | -1.5 <sup>a</sup> | -1.1 | -1.7    | -1.6 | -0.7 | -1.3    | -1.2 |
| Dimer Ethyne-Ethyne.TS.1.z.-30     | -1.0 <sup>a</sup> | -0.7 | -1.2    | -1.1 | -0.4 | -1.0    | -0.9 |
| Dimer Ethyne-Ethyne.TS.1.z.+30     | -1.0 <sup>a</sup> | -0.7 | -1.2    | -1.1 | -0.4 | -1.0    | -0.9 |
| Dimer Ethyne-Ethyne.TS.2.y.-30     | -1.3 <sup>a</sup> | -0.9 | -1.4    | -1.3 | -0.5 | -1.2    | -1.1 |
| Dimer Ethyne-Ethyne.TS.2.y.+30     | -1.3 <sup>a</sup> | -0.9 | -1.4    | -1.3 | -0.5 | -1.2    | -1.1 |
| Dimer Ethyne-Ethyne.TS.2.z.-30     | -1.4 <sup>a</sup> | -0.9 | -1.5    | -1.4 | -0.6 | -1.2    | -1.1 |
| Dimer Ethyne-Ethyne.TS.2.z.+30     | -1.4 <sup>a</sup> | -0.9 | -1.5    | -1.4 | -0.6 | -1.2    | -1.1 |
| Dimer Benzene-Water.OH-pi.1.y.-30  | -2.6 <sup>a</sup> | -2.0 | -3.0    | -2.9 | -1.6 | -2.8    | -2.6 |
| Dimer Benzene-Water.OH-pi.1.y.+30  | -2.6 <sup>a</sup> | -2.0 | -3.0    | -2.9 | -1.6 | -2.8    | -2.6 |
| Dimer Benzene-Water.OH-pi.1.z.-30  | -2.4 <sup>a</sup> | -1.7 | -2.7    | -2.6 | -1.4 | -2.6    | -2.5 |
| Dimer Benzene-Water.OH-pi.1.z.+30  | -2.6 <sup>a</sup> | -2.1 | -3.0    | -2.9 | -1.6 | -2.7    | -2.5 |
| Dimer Benzene-Water.OH-pi.2.y.-30  | -2.8 <sup>a</sup> | -1.8 | -3.0    | -2.9 | -1.4 | -2.9    | -2.7 |
| Dimer Benzene-Water.OH-pi.2.y.+30  | -2.8 <sup>a</sup> | -1.8 | -3.0    | -2.9 | -1.4 | -2.9    | -2.7 |
| Dimer Benzene-Water.OH-pi.2.z.-30  | -3.0 <sup>a</sup> | -1.6 | -2.7    | -2.7 | -1.1 | -2.6    | -2.4 |
| Dimer Benzene-Water.OH-pi.2.z.+30  | -3.1 <sup>a</sup> | -2.4 | -3.6    | -3.5 | -1.9 | -3.5    | -3.3 |
| Dimer Benzene-Ethyne.CH-pi.1.y.-30 | -2.1 <sup>a</sup> | -1.6 | -2.6    | -2.5 | -0.9 | -2.2    | -2.0 |
| Dimer Benzene-Ethyne.CH-pi.1.y.+30 | -2.1 <sup>a</sup> | -1.6 | -2.6    | -2.5 | -0.9 | -2.2    | -2.0 |
| Dimer Benzene-Ethyne.CH-pi.1.z.-30 | -2.1 <sup>a</sup> | -1.6 | -2.6    | -2.5 | -0.9 | -2.2    | -2.0 |
| Dimer Benzene-Ethyne.CH-pi.1.z.+30 | -2.1 <sup>a</sup> | -1.6 | -2.6    | -2.5 | -0.9 | -2.2    | -2.0 |
| Dimer Benzene-Ethyne.CH-pi.2.y.-30 | -2.7 <sup>a</sup> | -1.5 | -2.9    | -2.8 | -0.6 | -2.4    | -2.2 |

... continued on next page ...



Table S78: ... continued from previous page ...

| Species                             | Ref.              | OM2  | OM2-D3T | ODM2 | OM3  | OM3-D3T | ODM3 |
|-------------------------------------|-------------------|------|---------|------|------|---------|------|
| Dimer Benzene-Ethyne_CH-pi.2.y.+30  | -2.7 <sup>a</sup> | -1.5 | -2.9    | -2.8 | -0.6 | -2.4    | -2.2 |
| Dimer Benzene-Ethyne_CH-pi.2.z.-30  | -2.7 <sup>a</sup> | -1.5 | -2.9    | -2.8 | -0.6 | -2.4    | -2.2 |
| Dimer Benzene-Ethyne_CH-pi.2.z.+30  | -2.7 <sup>a</sup> | -1.5 | -2.9    | -2.8 | -0.6 | -2.4    | -2.2 |
| Dimer Benzene-MeOH_OH-pi.1.y.-30    | -3.5 <sup>a</sup> | -1.7 | -3.3    | -3.2 | -1.2 | -3.1    | -2.9 |
| Dimer Benzene-MeOH_OH-pi.1.y.+30    | -3.5 <sup>a</sup> | -1.7 | -3.3    | -3.3 | -1.2 | -3.1    | -2.9 |
| Dimer Benzene-MeOH_OH-pi.1.z.-30    | -3.3 <sup>a</sup> | -2.0 | -3.3    | -3.2 | -1.4 | -3.0    | -2.8 |
| Dimer Benzene-MeOH_OH-pi.1.z.+30    | -3.1 <sup>a</sup> | -1.0 | -2.7    | -2.6 | -0.7 | -2.7    | -2.5 |
| Dimer Benzene-MeOH_OH-pi.2.y.-30    | -3.5 <sup>a</sup> | -1.3 | -3.1    | -3.1 | -0.8 | -3.1    | -3.0 |
| Dimer Benzene-MeOH_OH-pi.2.y.+30    | -3.5 <sup>a</sup> | -1.3 | -3.1    | -3.1 | -0.8 | -3.1    | -3.0 |
| Dimer Benzene-MeOH_OH-pi.2.z.-30    | -2.6 <sup>a</sup> | -1.0 | -2.6    | -2.7 | -0.8 | -2.7    | -2.7 |
| Dimer Benzene-MeOH_OH-pi.2.z.+30    | -3.3 <sup>a</sup> | -1.1 | -2.6    | -2.6 | -0.6 | -2.5    | -2.3 |
| Dimer Benzene-MeNH2_NH-pi.1.y.-30   | -2.5 <sup>a</sup> | -0.9 | -2.5    | -2.5 | -0.4 | -2.3    | -2.3 |
| Dimer Benzene-MeNH2_NH-pi.1.y.+30   | -2.3 <sup>a</sup> | -0.7 | -2.3    | -2.3 | -0.4 | -2.2    | -2.2 |
| Dimer Benzene-MeNH2_NH-pi.1.z.-30   | -2.2 <sup>a</sup> | -0.5 | -2.1    | -2.1 | -0.2 | -2.1    | -2.0 |
| Dimer Benzene-MeNH2_NH-pi.1.z.+30   | -2.3 <sup>a</sup> | -1.1 | -2.4    | -2.4 | -0.6 | -2.2    | -2.2 |
| Dimer Benzene-MeNH2_NH-pi.2.y.-30   | -2.4 <sup>a</sup> | -0.3 | -2.1    | -2.2 | -0.0 | -2.2    | -2.1 |
| Dimer Benzene-MeNH2_NH-pi.2.y.+30   | -3.0 <sup>a</sup> | -1.1 | -3.1    | -3.2 | -0.6 | -3.0    | -3.0 |
| Dimer Benzene-MeNH2_NH-pi.2.z.-30   | -2.4 <sup>a</sup> | -0.4 | -2.0    | -2.1 | 0.1  | -1.9    | -1.8 |
| Dimer Benzene-MeNH2_NH-pi.2.z.+30   | -1.9 <sup>a</sup> | -0.5 | -2.0    | -2.1 | -0.4 | -2.1    | -2.1 |
| Dimer Benzene-AcOH_OH-pi.1.y.-30    | -3.9 <sup>a</sup> | -2.4 | -4.0    | -3.9 | -1.7 | -3.6    | -3.3 |
| Dimer Benzene-AcOH_OH-pi.1.y.+30    | -3.9 <sup>a</sup> | -2.5 | -4.0    | -4.0 | -1.7 | -3.6    | -3.4 |
| Dimer Benzene-AcOH_OH-pi.1.z.-30    | -3.6 <sup>a</sup> | -1.8 | -3.3    | -3.2 | -1.2 | -3.1    | -2.9 |
| Dimer Benzene-AcOH_OH-pi.1.z.+30    | -4.2 <sup>a</sup> | -2.9 | -4.3    | -4.2 | -2.0 | -3.8    | -3.5 |
| Dimer Benzene-AcOH_OH-pi.2.y.-30    | -4.2 <sup>a</sup> | -2.1 | -4.0    | -4.0 | -1.4 | -3.7    | -3.5 |
| Dimer Benzene-AcOH_OH-pi.2.y.+30    | -4.3 <sup>a</sup> | -2.2 | -4.1    | -4.1 | -1.4 | -3.8    | -3.6 |
| Dimer Benzene-AcOH_OH-pi.2.z.-30    | -2.1 <sup>a</sup> | -0.6 | -2.0    | -2.0 | -0.6 | -2.1    | -2.1 |
| Dimer Benzene-AcOH_OH-pi.2.z.+30    | -2.6 <sup>a</sup> | -0.7 | -2.0    | -2.0 | -0.4 | -2.0    | -1.9 |
| Dimer Benzene-AcNH2_NH-pi.1.y.-30   | -3.7 <sup>a</sup> | -2.4 | -3.9    | -3.8 | -1.7 | -3.5    | -3.3 |
| Dimer Benzene-AcNH2_NH-pi.1.y.+30   | -3.7 <sup>a</sup> | -2.5 | -4.0    | -3.8 | -1.8 | -3.6    | -3.4 |
| Dimer Benzene-AcNH2_NH-pi.1.z.-30   | -4.4 <sup>a</sup> | -2.4 | -4.4    | -4.3 | -1.5 | -4.0    | -3.7 |
| Dimer Benzene-AcNH2_NH-pi.1.z.+30   | -3.7 <sup>a</sup> | -1.9 | -3.3    | -3.2 | -1.3 | -3.1    | -2.9 |
| Dimer Benzene-AcNH2_NH-pi.2.y.-30   | -4.0 <sup>a</sup> | -2.6 | -4.3    | -4.1 | -1.9 | -3.9    | -3.7 |
| Dimer Benzene-AcNH2_NH-pi.2.y.+30   | -4.0 <sup>a</sup> | -2.6 | -4.3    | -4.1 | -1.9 | -3.9    | -3.7 |
| Dimer Benzene-AcNH2_NH-pi.2.z.-30   | -2.1 <sup>a</sup> | -1.2 | -2.2    | -2.1 | -0.9 | -2.1    | -2.0 |
| Dimer Benzene-AcNH2_NH-pi.2.z.+30   | -3.5 <sup>a</sup> | -2.4 | -3.8    | -3.7 | -1.7 | -3.3    | -3.1 |
| Dimer Benzene-Peptide_NH-pi.1.y.-30 | -4.1 <sup>a</sup> | -1.7 | -4.0    | -3.9 | -1.0 | -3.6    | -3.5 |
| Dimer Benzene-Peptide_NH-pi.1.y.+30 | -4.1 <sup>a</sup> | -1.7 | -4.0    | -4.0 | -1.0 | -3.8    | -3.6 |
| Dimer Benzene-Peptide_NH-pi.1.z.-30 | -3.9 <sup>a</sup> | -1.6 | -3.8    | -3.7 | -0.8 | -3.4    | -3.2 |
| Dimer Benzene-Peptide_NH-pi.1.z.+30 | -3.8 <sup>a</sup> | -1.5 | -3.6    | -3.6 | -0.8 | -3.4    | -3.2 |
| Dimer Benzene-Peptide_NH-pi.2.y.-30 | -4.9 <sup>a</sup> | -1.9 | -4.6    | -4.6 | -1.0 | -4.3    | -4.0 |
| Dimer Benzene-Peptide_NH-pi.2.y.+30 | -4.6 <sup>a</sup> | -1.4 | -4.3    | -4.3 | -0.8 | -4.2    | -4.0 |
| Dimer Benzene-Peptide_NH-pi.2.z.-30 | -3.1 <sup>a</sup> | -1.1 | -3.0    | -3.0 | -0.7 | -3.0    | -2.9 |
| Dimer Benzene-Peptide_NH-pi.2.z.+30 | -3.2 <sup>a</sup> | -1.5 | -3.4    | -3.3 | -0.9 | -3.2    | -3.0 |
| Dimer Benzene-Benzene_TS.1.y.-30    | -2.0 <sup>a</sup> | -0.6 | -2.2    | -2.2 | -0.2 | -2.1    | -2.0 |
| Dimer Benzene-Benzene_TS.1.y.+30    | -2.1 <sup>a</sup> | -0.6 | -2.3    | -2.3 | -0.2 | -2.2    | -2.2 |
| Dimer Benzene-Benzene_TS.1.z.-30    | -1.8 <sup>a</sup> | -0.6 | -2.1    | -2.0 | -0.3 | -1.9    | -1.9 |
| Dimer Benzene-Benzene_TS.1.z.+30    | -2.1 <sup>a</sup> | -0.5 | -2.2    | -2.2 | -0.0 | -2.1    | -2.0 |
| Dimer Benzene-Benzene_TS.2.y.-30    | -2.8 <sup>a</sup> | -0.5 | -2.7    | -2.7 | 0.1  | -2.6    | -2.5 |
| Dimer Benzene-Benzene_TS.2.y.+30    | -2.7 <sup>a</sup> | -0.3 | -2.6    | -2.7 | 0.2  | -2.7    | -2.6 |
| Dimer Benzene-Benzene_TS.2.z.-30    | -1.9 <sup>a</sup> | -0.5 | -2.2    | -2.1 | -0.1 | -2.0    | -2.0 |
| Dimer Benzene-Benzene_TS.2.z.+30    | -2.8 <sup>a</sup> | -0.6 | -2.7    | -2.7 | 0.1  | -2.5    | -2.3 |
| Dimer Pyridine-Pyridine_TS.1.y.-30  | -2.6 <sup>a</sup> | -1.1 | -2.8    | -2.8 | -0.5 | -2.6    | -2.6 |
| Dimer Pyridine-Pyridine_TS.1.y.+30  | -2.6 <sup>a</sup> | -1.1 | -2.8    | -2.8 | -0.5 | -2.6    | -2.6 |
| Dimer Pyridine-Pyridine_TS.1.z.-30  | -1.9 <sup>a</sup> | -0.7 | -2.3    | -2.2 | -0.3 | -2.1    | -2.0 |
| Dimer Pyridine-Pyridine_TS.1.z.+30  | -3.1 <sup>a</sup> | -1.5 | -3.0    | -3.1 | -1.1 | -2.9    | -3.0 |
| Dimer Pyridine-Pyridine_TS.2.y.-30  | -3.3 <sup>a</sup> | -1.0 | -3.2    | -3.3 | -0.4 | -3.1    | -3.1 |
| Dimer Pyridine-Pyridine_TS.2.y.+30  | -3.3 <sup>a</sup> | -1.0 | -3.2    | -3.3 | -0.4 | -3.1    | -3.1 |
| Dimer Pyridine-Pyridine_TS.2.z.-30  | -2.4 <sup>a</sup> | -1.1 | -2.5    | -2.5 | -0.6 | -2.3    | -2.4 |
| Dimer Pyridine-Pyridine_TS.2.z.+30  | -2.9 <sup>a</sup> | -0.7 | -2.7    | -2.7 | 0.1  | -2.3    | -2.3 |
| Dimer Benzene-Pyridine_TS.1.y.-30   | -2.4 <sup>a</sup> | -1.0 | -2.6    | -2.6 | -0.5 | -2.4    | -2.4 |
| Dimer Benzene-Pyridine_TS.1.y.+30   | -2.4 <sup>a</sup> | -1.0 | -2.6    | -2.6 | -0.5 | -2.4    | -2.4 |
| Dimer Benzene-Pyridine_TS.1.z.-30   | -2.4 <sup>a</sup> | -0.8 | -2.5    | -2.5 | -0.3 | -2.4    | -2.3 |
| Dimer Benzene-Pyridine_TS.1.z.+30   | -2.1 <sup>a</sup> | -1.0 | -2.5    | -2.4 | -0.5 | -2.2    | -2.2 |
| Dimer Benzene-Pyridine_TS.2.y.-30   | -3.2 <sup>a</sup> | -0.9 | -3.2    | -3.2 | -0.2 | -3.0    | -3.0 |
| Dimer Benzene-Pyridine_TS.2.y.+30   | -3.2 <sup>a</sup> | -0.9 | -3.2    | -3.2 | -0.2 | -3.0    | -3.0 |

... continued on next page ...

Table S78: ... continued from previous page ...

| Species                              | Ref.              | OM2  | OM2-D3T | ODM2 | OM3  | OM3-D3T | ODM3 |
|--------------------------------------|-------------------|------|---------|------|------|---------|------|
| Dimer Benzene-Pyridine_TS.2.z.-30    | -3.2 <sup>a</sup> | -1.1 | -3.2    | -3.1 | -0.2 | -2.8    | -2.7 |
| Dimer Benzene-Pyridine_TS.2.z.+30    | -2.2 <sup>a</sup> | -0.9 | -2.5    | -2.5 | -0.4 | -2.3    | -2.3 |
| Dimer Ethyne-Water_CH-O.1.y.-30      | -2.4 <sup>a</sup> | -2.5 | -2.8    | -2.7 | -2.3 | -2.7    | -2.5 |
| Dimer Ethyne-Water_CH-O.1.y.+30      | -2.4 <sup>a</sup> | -2.4 | -2.7    | -2.6 | -2.2 | -2.6    | -2.4 |
| Dimer Ethyne-Water_CH-O.1.z.-30      | -2.5 <sup>a</sup> | -2.5 | -2.8    | -2.7 | -2.3 | -2.7    | -2.4 |
| Dimer Ethyne-Water_CH-O.1.z.+30      | -2.5 <sup>a</sup> | -2.4 | -2.8    | -2.7 | -2.2 | -2.6    | -2.4 |
| Dimer Ethyne-Water_CH-O.2.y.-30      | -2.8 <sup>a</sup> | -2.7 | -3.1    | -3.0 | -2.4 | -2.9    | -2.6 |
| Dimer Ethyne-Water_CH-O.2.y.+30      | -2.8 <sup>a</sup> | -3.0 | -3.3    | -3.2 | -2.6 | -3.1    | -2.8 |
| Dimer Ethyne-Water_CH-O.2.z.-30      | -2.4 <sup>a</sup> | -2.6 | -2.9    | -2.8 | -2.2 | -2.6    | -2.3 |
| Dimer Ethyne-Water_CH-O.2.z.+30      | -2.4 <sup>a</sup> | -2.5 | -2.9    | -2.8 | -2.1 | -2.6    | -2.3 |
| Dimer Ethyne-AcOH_OH-pi.1.y.-30      | -4.8 <sup>a</sup> | -3.8 | -4.8    | -4.7 | -2.7 | -4.0    | -3.7 |
| Dimer Ethyne-AcOH_OH-pi.1.y.+30      | -4.8 <sup>a</sup> | -3.8 | -4.8    | -4.7 | -2.7 | -4.0    | -3.7 |
| Dimer Ethyne-AcOH_OH-pi.1.z.-30      | -3.1 <sup>a</sup> | -2.2 | -3.0    | -2.9 | -1.6 | -2.6    | -2.4 |
| Dimer Ethyne-AcOH_OH-pi.1.z.+30      | -3.9 <sup>a</sup> | -3.0 | -3.8    | -3.7 | -2.0 | -3.1    | -2.8 |
| Dimer Ethyne-AcOH_OH-pi.2.y.-30      | -4.3 <sup>a</sup> | -3.4 | -4.3    | -4.3 | -2.4 | -3.7    | -3.4 |
| Dimer Ethyne-AcOH_OH-pi.2.y.+30      | -4.3 <sup>a</sup> | -3.4 | -4.3    | -4.3 | -2.4 | -3.7    | -3.4 |
| Dimer Ethyne-AcOH_OH-pi.2.z.-30      | -2.6 <sup>a</sup> | -2.2 | -2.9    | -2.9 | -1.8 | -2.6    | -2.4 |
| Dimer Ethyne-AcOH_OH-pi.2.z.+30      | -3.4 <sup>a</sup> | -2.3 | -3.1    | -3.0 | -1.6 | -2.6    | -2.4 |
| Dimer Peptide-Ethene.1.y.-30         | -2.2 <sup>a</sup> | -0.9 | -1.9    | -1.9 | -0.7 | -1.8    | -1.8 |
| Dimer Peptide-Ethene.1.y.+30         | -1.9 <sup>a</sup> | -0.6 | -2.0    | -2.0 | -0.3 | -1.9    | -1.9 |
| Dimer Peptide-Ethene.1.z.-30         | -1.3 <sup>a</sup> | -0.6 | -1.5    | -1.5 | -0.2 | -1.4    | -1.3 |
| Dimer Peptide-Ethene.1.z.+30         | -2.0 <sup>a</sup> | -0.9 | -2.0    | -2.0 | -0.6 | -1.9    | -1.8 |
| Dimer Peptide-Ethene.2.y.-30         | -2.0 <sup>a</sup> | -0.7 | -1.9    | -1.9 | -0.4 | -1.8    | -1.7 |
| Dimer Peptide-Ethene.2.y.+30         | -2.3 <sup>a</sup> | -0.6 | -2.1    | -2.2 | -0.3 | -2.1    | -2.1 |
| Dimer Peptide-Ethene.2.z.-30         | -2.5 <sup>a</sup> | -1.2 | -2.4    | -2.5 | -0.9 | -2.4    | -2.3 |
| Dimer Peptide-Ethene.2.z.+30         | -1.8 <sup>a</sup> | -0.3 | -1.6    | -1.6 | 0.1  | -1.6    | -1.5 |
| Dimer Pyridine-Ethyne.1.y.-30        | -3.7 <sup>a</sup> | -2.9 | -3.7    | -3.6 | -2.5 | -3.4    | -3.5 |
| Dimer Pyridine-Ethyne.1.y.+30        | -3.6 <sup>a</sup> | -2.8 | -3.6    | -3.6 | -2.4 | -3.3    | -3.4 |
| Dimer Pyridine-Ethyne.1.z.-30        | -3.5 <sup>a</sup> | -2.5 | -3.3    | -3.2 | -1.9 | -2.9    | -2.9 |
| Dimer Pyridine-Ethyne.1.z.+30        | -3.5 <sup>a</sup> | -2.5 | -3.3    | -3.2 | -1.9 | -2.9    | -2.9 |
| Dimer Pyridine-Ethyne.2.y.-30        | -3.4 <sup>a</sup> | -2.7 | -3.5    | -3.5 | -2.3 | -3.2    | -3.3 |
| Dimer Pyridine-Ethyne.2.y.+30        | -3.3 <sup>a</sup> | -2.7 | -3.4    | -3.4 | -2.3 | -3.2    | -3.3 |
| Dimer Pyridine-Ethyne.2.z.-30        | -3.4 <sup>a</sup> | -2.8 | -3.5    | -3.5 | -2.4 | -3.3    | -3.4 |
| Dimer Pyridine-Ethyne.2.z.+30        | -3.4 <sup>a</sup> | -2.8 | -3.5    | -3.6 | -2.4 | -3.3    | -3.4 |
| Dimer Pentane-AcOH.1.y.-30           | -1.5 <sup>a</sup> | -0.4 | -1.8    | -1.8 | -0.0 | -1.7    | -1.6 |
| Dimer Pentane-AcOH.1.y.+30           | -1.4 <sup>a</sup> | -0.3 | -1.5    | -1.5 | -0.2 | -1.5    | -1.5 |
| Dimer Pentane-AcOH.1.z.-30           | -1.8 <sup>a</sup> | -0.1 | -1.8    | -1.8 | 0.1  | -1.8    | -1.8 |
| Dimer Pentane-AcOH.1.z.+30           | -1.6 <sup>a</sup> | -0.3 | -1.8    | -1.8 | 0.0  | -1.8    | -1.7 |
| Dimer Pentane-AcOH.2.y.-30           | -1.7 <sup>a</sup> | -0.4 | -2.1    | -2.1 | 0.0  | -1.9    | -1.8 |
| Dimer Pentane-AcOH.2.y.+30           | -2.4 <sup>a</sup> | -0.6 | -2.4    | -2.4 | -0.3 | -2.4    | -2.4 |
| Dimer Pentane-AcOH.2.z.-30           | -2.3 <sup>a</sup> | -0.5 | -2.4    | -2.4 | 0.0  | -2.3    | -2.3 |
| Dimer Pentane-AcOH.2.z.+30           | -2.1 <sup>a</sup> | -0.3 | -1.8    | -1.9 | -0.1 | -1.9    | -2.0 |
| Dimer Pentane-AcNH2.1.y.-30          | -1.8 <sup>a</sup> | -0.3 | -1.6    | -1.7 | -0.1 | -1.7    | -1.6 |
| Dimer Pentane-AcNH2.1.y.+30          | -1.5 <sup>a</sup> | -0.5 | -1.6    | -1.6 | -0.1 | -1.5    | -1.4 |
| Dimer Pentane-AcNH2.1.z.-30          | -2.2 <sup>a</sup> | -0.2 | -2.1    | -2.1 | 0.2  | -2.0    | -1.9 |
| Dimer Pentane-AcNH2.1.z.+30          | -2.2 <sup>a</sup> | -0.5 | -2.2    | -2.3 | -0.2 | -2.2    | -2.2 |
| Dimer Pentane-AcNH2.2.y.-30          | -2.6 <sup>a</sup> | -0.7 | -2.6    | -2.6 | -0.1 | -2.5    | -2.3 |
| Dimer Pentane-AcNH2.2.y.+30          | -2.2 <sup>a</sup> | -0.6 | -2.4    | -2.3 | 0.0  | -2.1    | -2.0 |
| Dimer Pentane-AcNH2.2.z.-30          | -2.5 <sup>a</sup> | -0.3 | -1.9    | -2.0 | -0.1 | -1.9    | -1.9 |
| Dimer Pentane-AcNH2.2.z.+30          | -2.6 <sup>a</sup> | -0.5 | -2.8    | -2.8 | 0.1  | -2.8    | -2.6 |
| Dimer Benzene-AcOH.1.y.-30           | -2.9 <sup>a</sup> | -1.4 | -3.2    | -3.2 | -0.9 | -3.0    | -3.0 |
| Dimer Benzene-AcOH.1.y.+30           | -2.4 <sup>a</sup> | -1.0 | -2.7    | -2.7 | -0.6 | -2.5    | -2.4 |
| Dimer Benzene-AcOH.1.z.-30           | -2.9 <sup>a</sup> | -1.3 | -3.1    | -3.2 | -0.7 | -3.0    | -2.9 |
| Dimer Benzene-AcOH.1.z.+30           | -2.2 <sup>a</sup> | -0.9 | -2.5    | -2.5 | -0.5 | -2.3    | -2.3 |
| Dimer Benzene-AcOH.2.y.-30           | -2.4 <sup>a</sup> | -0.7 | -2.5    | -2.6 | -0.5 | -2.5    | -2.6 |
| Dimer Benzene-AcOH.2.y.+30           | -3.0 <sup>a</sup> | -1.2 | -3.2    | -3.2 | -0.4 | -2.9    | -2.8 |
| Dimer Benzene-AcOH.2.z.-30           | -2.8 <sup>a</sup> | -1.3 | -3.2    | -3.2 | -0.7 | -2.9    | -2.8 |
| Dimer Benzene-AcOH.2.z.+30           | -2.1 <sup>a</sup> | -0.5 | -2.2    | -2.4 | -0.3 | -2.3    | -2.4 |
| Dimer Pyridine-Pyridine_CH-N.1.y.-30 | -3.8 <sup>a</sup> | -2.3 | -3.6    | -3.8 | -1.6 | -3.2    | -3.5 |
| Dimer Pyridine-Pyridine_CH-N.1.y.+30 | -3.8 <sup>a</sup> | -2.3 | -3.6    | -3.7 | -1.6 | -3.2    | -3.5 |
| Dimer Pyridine-Pyridine_CH-N.1.z.-30 | -2.8 <sup>a</sup> | -1.8 | -2.8    | -2.9 | -1.4 | -2.6    | -2.8 |
| Dimer Pyridine-Pyridine_CH-N.1.z.+30 | -2.9 <sup>a</sup> | -1.8 | -2.8    | -2.9 | -1.2 | -2.5    | -2.7 |
| Dimer Pyridine-Pyridine_CH-N.2.y.-30 | -3.8 <sup>a</sup> | -2.3 | -3.6    | -3.8 | -1.6 | -3.2    | -3.5 |
| Dimer Pyridine-Pyridine_CH-N.2.y.+30 | -3.8 <sup>a</sup> | -2.3 | -3.6    | -3.8 | -1.6 | -3.2    | -3.5 |
| Dimer Pyridine-Pyridine_CH-N.2.z.-30 | -2.6 <sup>a</sup> | -1.6 | -2.6    | -2.6 | -1.2 | -2.4    | -2.6 |

... continued on next page ...

Table S78: ... continued from previous page ...

| Species                              | Ref.              | OM2  | OM2-D3T | ODM2 | OM3  | OM3-D3T | ODM3 |
|--------------------------------------|-------------------|------|---------|------|------|---------|------|
| Dimer Pyridine-Pyridine_CH-N_2.z.+30 | -2.6 <sup>a</sup> | -1.6 | -2.7    | -2.7 | -0.9 | -2.2    | -2.4 |
| Dimer MeNH2-Pyridine_1.y.-30         | -3.3 <sup>a</sup> | -1.1 | -2.3    | -2.4 | -0.9 | -2.3    | -2.6 |
| Dimer MeNH2-Pyridine_1.y.+30         | -2.6 <sup>a</sup> | -0.5 | -2.2    | -2.3 | -0.1 | -2.2    | -2.2 |
| Dimer MeNH2-Pyridine_1.z.-30         | -3.5 <sup>a</sup> | -1.0 | -2.8    | -3.1 | -0.7 | -3.0    | -3.2 |
| Dimer MeNH2-Pyridine_1.z.+30         | -3.5 <sup>a</sup> | -1.0 | -2.5    | -2.7 | -0.7 | -2.6    | -2.8 |
| Dimer MeNH2-Pyridine_2.y.-30         | -3.9 <sup>a</sup> | -1.2 | -2.6    | -2.7 | -1.0 | -2.7    | -3.0 |
| Dimer MeNH2-Pyridine_2.y.+30         | -2.7 <sup>a</sup> | -0.7 | -2.5    | -2.6 | -0.3 | -2.5    | -2.6 |
| Dimer MeNH2-Pyridine_2.z.-30         | -2.6 <sup>a</sup> | -1.2 | -2.6    | -2.7 | -0.7 | -2.4    | -2.5 |
| Dimer MeNH2-Pyridine_2.z.+30         | -3.1 <sup>a</sup> | -0.3 | -2.1    | -2.2 | 0.0  | -2.3    | -2.3 |

a J.Rezac, K.E.Riley, and P.Hobza, J.Chem.Theory Comput. 7, 2427 (2011) ; 7, 3466 (2011).

Table S79: Benchmark Results for the JSCH2005-CHNOF Set. Interaction Energies (kcal/mol)

| Species                      | Ref.               | OM2   | OM2-D3T | ODM2  | OM3   | OM3-D3T | ODM3  |
|------------------------------|--------------------|-------|---------|-------|-------|---------|-------|
| Dimer G...C WC(1)            | -32.1 <sup>a</sup> | -23.8 | -26.7   | -27.1 | -22.9 | -26.7   | -28.7 |
| Dimer mG...mC WC             | -31.6 <sup>a</sup> | -24.2 | -27.3   | -27.9 | -23.4 | -27.3   | -29.8 |
| Dimer A...T WC               | -16.9 <sup>a</sup> | -11.1 | -13.6   | -13.4 | -11.3 | -14.5   | -16.4 |
| Dimer mA...mT H              | -18.2 <sup>a</sup> | -11.8 | -14.4   | -14.6 | -12.6 | -15.9   | -18.2 |
| Dimer 8-oxoG...C WC          | -33.3 <sup>a</sup> | -26.0 | -29.1   | -29.6 | -25.3 | -29.2   | -31.6 |
| Dimer I...C WC               | -24.9 <sup>a</sup> | -19.5 | -22.1   | -22.4 | -19.4 | -22.8   | -25.4 |
| Dimer G...U wobble           | -19.1 <sup>a</sup> | -14.2 | -16.5   | -16.9 | -12.5 | -15.4   | -15.9 |
| Dimer C...C H+               | -51.4 <sup>a</sup> | -44.9 | -48.1   | -48.9 | -45.7 | -49.7   | -52.8 |
| Dimer U...U "calcutta"       | -10.3 <sup>a</sup> | -8.4  | -10.1   | -10.2 | -7.1  | -9.2    | -9.0  |
| Dimer U...U pl               | -13.7 <sup>a</sup> | -10.1 | -12.0   | -12.1 | -8.6  | -11.1   | -11.2 |
| Dimer 2-aminoA...T           | -19.5 <sup>a</sup> | -14.2 | -17.3   | -17.3 | -13.8 | -17.8   | -20.1 |
| Dimer 2-aminoA...T pl        | -19.7 <sup>a</sup> | -14.3 | -17.3   | -17.2 | -13.6 | -17.5   | -19.5 |
| Dimer A...difluorotoluene WC | -5.2 <sup>a</sup>  | -3.0  | -4.7    | -4.7  | -2.2  | -4.2    | -4.3  |
| Dimer A...C                  | -17.6 <sup>a</sup> | -11.3 | -13.8   | -13.3 | -12.6 | -15.8   | -18.8 |
| Dimer G...G H-bond           | -21.3 <sup>a</sup> | -15.3 | -17.8   | -18.2 | -15.6 | -18.8   | -20.5 |
| Dimer G...A1                 | -19.4 <sup>a</sup> | -12.9 | -15.8   | -15.9 | -12.8 | -16.5   | -18.6 |
| Dimer G...A1 pl              | -18.9 <sup>a</sup> | -12.8 | -15.6   | -15.5 | -12.5 | -16.0   | -17.5 |
| Dimer G...A2                 | -14.4 <sup>a</sup> | -7.5  | -10.0   | -10.0 | -8.4  | -11.5   | -14.2 |
| Dimer GA2pl                  | -12.8 <sup>a</sup> | -7.3  | -9.9    | -9.9  | -8.4  | -11.5   | -14.4 |
| Dimer G...A3                 | -18.8 <sup>a</sup> | -12.1 | -15.0   | -15.3 | -12.4 | -16.0   | -18.3 |
| Dimer G...A4                 | -13.5 <sup>a</sup> | -7.9  | -10.4   | -10.2 | -9.0  | -12.1   | -15.0 |
| Dimer A...A1                 | -14.5 <sup>a</sup> | -8.6  | -10.9   | -10.5 | -9.8  | -12.8   | -15.6 |
| Dimer A...A2                 | -13.7 <sup>a</sup> | -7.4  | -9.8    | -9.5  | -8.7  | -11.7   | -14.4 |
| Dimer A...A3                 | -12.2 <sup>a</sup> | -5.9  | -8.4    | -8.2  | -6.9  | -9.9    | -12.3 |
| Dimer 8-oxoG...G             | -22.8 <sup>a</sup> | -17.4 | -19.9   | -20.4 | -15.7 | -18.9   | -19.3 |
| Dimer mA...mT WC(AT)         | -16.4 <sup>a</sup> | -11.0 | -13.6   | -13.4 | -11.4 | -14.7   | -16.8 |
| Dimer mG...mC WC*            | -35.8 <sup>a</sup> | -27.5 | -30.6   | -31.3 | -26.5 | -30.5   | -33.4 |
| Dimer mA...mT WC(AC)         | -18.4 <sup>a</sup> | -12.1 | -14.7   | -14.5 | -12.6 | -15.9   | -18.0 |
| Dimer G...A HB               | -11.3 <sup>a</sup> | -7.6  | -10.5   | -10.5 | -9.0  | -12.6   | -16.3 |
| Dimer C...G WC               | -30.7 <sup>a</sup> | -26.6 | -29.7   | -30.2 | -25.8 | -29.8   | -32.3 |
| Dimer G...C WC(2)            | -31.4 <sup>a</sup> | -26.4 | -29.5   | -29.8 | -25.5 | -29.5   | -31.8 |
| Dimer GG0/3.36CGis036        | -3.7 <sup>a</sup>  | -1.9  | -3.2    | -3.2  | -2.0  | -3.3    | -3.2  |
| Dimer GG0/3.36GCis036        | -4.8 <sup>a</sup>  | -3.9  | -4.5    | -4.6  | -3.9  | -4.6    | -4.5  |
| Dimer AA20/3.05ATis2005      | -2.3 <sup>a</sup>  | -1.1  | -2.2    | -2.2  | -1.0  | -2.3    | -2.1  |
| Dimer AA20/3.05TAis2005      | -2.2 <sup>a</sup>  | -1.0  | -2.4    | -2.4  | -0.6  | -2.2    | -2.3  |
| Dimer GC0/3.25C//Cis         | 3.1 <sup>a</sup>   | 3.8   | 3.5     | 3.6   | 3.8   | 3.5     | 3.4   |
| Dimer GC0/3.25G//Gis         | 1.9 <sup>a</sup>   | 5.0   | 3.2     | 3.2   | 5.3   | 3.3     | 2.7   |
| Dimer CG0/3.19G//Gis         | -3.9 <sup>a</sup>  | 2.2   | 1.6     | 1.7   | 2.2   | 1.6     | 1.5   |
| Dimer CG0/3.19C//Cis         | 1.2 <sup>a</sup>   | -0.1  | -3.9    | -3.9  | 0.7   | -3.8    | -4.4  |
| Dimer GA10/3.15A//Cis        | -0.3 <sup>a</sup>  | 1.2   | 0.2     | 0.1   | 1.3   | 0.1     | 0.1   |
| Dimer GA10/3.15T//Gis        | 0.6 <sup>a</sup>   | 2.0   | 1.2     | 1.2   | 2.1   | 1.3     | 1.1   |
| Dimer AG08/3.19T//Gis        | -0.5 <sup>a</sup>  | 1.0   | -0.7    | -0.7  | 1.3   | -0.6    | -0.8  |
| Dimer AG08/3.19A//Cis        | -0.2 <sup>a</sup>  | 0.9   | -0.1    | -0.0  | 1.0   | -0.1    | -0.1  |
| Dimer TG03.19A//Gis          | -4.2 <sup>a</sup>  | -1.2  | -4.3    | -4.3  | -0.8  | -4.4    | -4.3  |
| Dimer TG03.19T//Cis          | -1.1 <sup>a</sup>  | -0.6  | -1.0    | -1.0  | -0.6  | -1.1    | -1.0  |
| Dimer GT10/3.15T//Cis        | 0.3 <sup>a</sup>   | 1.0   | 0.7     | 0.7   | 0.9   | 0.6     | 0.5   |
| Dimer GT10/3.15A//Gis        | -4.1 <sup>a</sup>  | -1.7  | -3.5    | -3.6  | -1.8  | -3.8    | -3.6  |
| Dimer AT10/3.26T//Tis        | 0.9 <sup>a</sup>   | 1.7   | 1.1     | 1.1   | 1.7   | 1.1     | 0.9   |
| Dimer AT10/3.26A//Ais        | -0.9 <sup>a</sup>  | 0.4   | -0.9    | -0.9  | 0.5   | -1.0    | -1.1  |
| Dimer TA08/3.16A//Ais        | -1.6 <sup>a</sup>  | 0.9   | -1.7    | -2.0  | 1.1   | -2.1    | -2.0  |
| Dimer TA08/3.16T//Tis        | 0.7 <sup>a</sup>   | 1.4   | 1.0     | 1.0   | 1.5   | 1.1     | 1.0   |
| Dimer AA0/3.24A//Tis         | -1.7 <sup>a</sup>  | -0.4  | -1.3    | -1.4  | -0.4  | -1.4    | -1.4  |
| Dimer AA0/3.24T//Ais         | -1.3 <sup>a</sup>  | -0.3  | -1.1    | -1.1  | -0.3  | -1.2    | -1.1  |
| Dimer A...A                  | -0.7 <sup>a</sup>  | 0.6   | -1.0    | -1.0  | 0.6   | -1.2    | -1.2  |
| Dimer T...T                  | 1.0 <sup>a</sup>   | 1.9   | 1.3     | 1.3   | 1.9   | 1.3     | 1.1   |
| Dimer G...G interstrand      | -4.5 <sup>a</sup>  | -0.2  | -4.3    | -4.4  | 0.4   | -4.4    | -4.8  |
| Dimer C...C                  | 1.4 <sup>a</sup>   | 2.4   | 1.5     | 1.7   | 2.4   | 1.4     | 1.4   |
| Dimer A...G                  | -4.8 <sup>a</sup>  | -2.3  | -4.0    | -3.9  | -2.2  | -4.1    | -3.9  |
| Dimer T...C                  | -0.1 <sup>a</sup>  | 0.7   | 0.3     | 0.3   | 0.7   | 0.3     | 0.2   |
| Dimer C...A                  | -3.0 <sup>a</sup>  | 0.2   | -1.2    | -1.0  | 0.5   | -1.1    | -0.8  |
| Dimer G...G 9                | -5.2 <sup>a</sup>  | -4.2  | -5.3    | -5.5  | -4.1  | -5.4    | -5.5  |
| Dimer G...G 10               | 0.8 <sup>a</sup>   | 4.3   | 1.8     | 1.9   | 4.7   | 1.9     | 1.2   |

... continued on next page ...

Table S79: ... continued from previous page ...

| Species                | Ref.               | OM2   | OM2-D3T | ODM2  | OM3   | OM3-D3T | ODM3  |
|------------------------|--------------------|-------|---------|-------|-------|---------|-------|
| Dimer C...C 11         | 3.1 <sup>a</sup>   | 3.8   | 3.5     | 3.7   | 3.8   | 3.5     | 3.5   |
| Dimer G...C S          | -19.0 <sup>a</sup> | -11.7 | -17.8   | -18.8 | -10.8 | -18.4   | -18.5 |
| Dimer mG...mC S        | -20.4 <sup>a</sup> | -11.2 | -19.1   | -20.5 | -10.0 | -20.1   | -20.1 |
| Dimer A...T S1         | -12.3 <sup>a</sup> | -4.0  | -10.6   | -11.1 | -3.3  | -11.5   | -11.2 |
| Dimer mA...mT S        | -14.6 <sup>a</sup> | -4.3  | -12.8   | -13.4 | -2.9  | -13.6   | -13.0 |
| Dimer CC 1             | 2.5 <sup>a</sup>   | 6.7   | 2.2     | 2.1   | 6.8   | 1.5     | 1.3   |
| Dimer CC 2             | -3.9 <sup>a</sup>  | 1.9   | -2.8    | -3.1  | 1.9   | -3.8    | -3.6  |
| Dimer CC 3             | -8.9 <sup>a</sup>  | -3.1  | -7.8    | -8.5  | -3.0  | -8.8    | -8.6  |
| Dimer CC 4             | -9.9 <sup>a</sup>  | -4.2  | -8.8    | -9.9  | -3.8  | -9.5    | -9.9  |
| Dimer CC 5             | 0.3 <sup>a</sup>   | 5.8   | 1.2     | 1.0   | 5.9   | 0.4     | 0.2   |
| Dimer CC 6             | 0.6 <sup>a</sup>   | 6.1   | 1.5     | 1.4   | 6.4   | 0.8     | 0.5   |
| Dimer CC 7             | -1.0 <sup>a</sup>  | 3.3   | 0.2     | 0.1   | 3.1   | -0.5    | -0.3  |
| Dimer CC 8             | -9.1 <sup>a</sup>  | -3.2  | -7.3    | -8.4  | -3.3  | -8.2    | -8.3  |
| Dimer CC 9             | -9.1 <sup>a</sup>  | -4.4  | -9.1    | -10.0 | -3.8  | -9.5    | -9.9  |
| Dimer CC 10            | -8.3 <sup>a</sup>  | -3.6  | -8.1    | -9.1  | -3.2  | -8.7    | -9.0  |
| Dimer CC 11            | -9.4 <sup>a</sup>  | -4.6  | -9.0    | -10.1 | -4.3  | -9.6    | -10.0 |
| Dimer CC 12            | -7.4 <sup>a</sup>  | -3.1  | -5.7    | -6.6  | -3.9  | -7.0    | -6.6  |
| Dimer CC 13            | -8.8 <sup>a</sup>  | -3.5  | -7.6    | -8.4  | -3.0  | -7.9    | -8.3  |
| Dimer CC 14            | -9.1 <sup>a</sup>  | -4.0  | -8.8    | -9.8  | -3.8  | -9.6    | -9.6  |
| Dimer A...A S          | -8.6 <sup>a</sup>  | -0.8  | -6.1    | -6.9  | -0.7  | -7.1    | -7.2  |
| Dimer GGst             | -12.7 <sup>a</sup> | -4.4  | -10.3   | -11.1 | -4.3  | -11.4   | -11.3 |
| Dimer ACst             | -10.2 <sup>a</sup> | -3.4  | -8.4    | -9.0  | -3.0  | -9.1    | -9.1  |
| Dimer GAst             | -11.4 <sup>a</sup> | -2.8  | -8.4    | -9.3  | -2.7  | -9.5    | -9.4  |
| Dimer CCst             | -10.0 <sup>a</sup> | -5.0  | -9.6    | -10.5 | -4.4  | -9.9    | -10.4 |
| Dimer AUst             | -9.8 <sup>a</sup>  | -3.3  | -8.4    | -8.9  | -3.0  | -9.1    | -9.0  |
| Dimer GCst             | -10.6 <sup>a</sup> | -5.2  | -10.1   | -10.6 | -4.6  | -10.6   | -10.8 |
| Dimer CUst             | -10.4 <sup>a</sup> | -5.1  | -9.6    | -10.1 | -5.1  | -10.5   | -10.1 |
| Dimer UUst             | -7.5 <sup>a</sup>  | -3.3  | -7.4    | -7.7  | -3.2  | -8.2    | -7.8  |
| Dimer GUst             | -12.1 <sup>a</sup> | -5.7  | -10.9   | -11.3 | -5.5  | -11.8   | -11.4 |
| Dimer GG0/3.36GGs036   | -3.5 <sup>a</sup>  | 3.7   | 0.0     | -0.1  | 3.4   | -1.0    | -0.6  |
| Dimer GG0/3.36CCs036   | -1.6 <sup>a</sup>  | 4.6   | -0.7    | -1.3  | 4.6   | -1.7    | -2.0  |
| Dimer AA20/3.05AAs2005 | -6.1 <sup>a</sup>  | 1.3   | -4.2    | -4.9  | 1.3   | -5.4    | -5.2  |
| Dimer AA20/3.05TTs2005 | -4.2 <sup>a</sup>  | 1.7   | -3.1    | -3.5  | 2.0   | -3.8    | -4.0  |
| Dimer GC0/3.25G//Cs    | -10.8 <sup>a</sup> | -4.0  | -9.5    | -10.3 | -4.0  | -10.7   | -10.3 |
| Dimer CG0/3.19G//Cs    | -7.9 <sup>a</sup>  | -1.8  | -5.3    | -6.3  | -2.7  | -7.0    | -6.4  |
| Dimer GA10/3.15A//Gs   | -9.1 <sup>a</sup>  | -1.2  | -7.3    | -7.8  | -1.1  | -8.5    | -8.2  |
| Dimer GA10/3.15T//Cs   | -4.7 <sup>a</sup>  | 0.6   | -3.6    | -3.8  | 0.6   | -4.4    | -4.2  |
| Dimer AG08/3.19A//Gs   | -7.6 <sup>a</sup>  | 0.3   | -4.4    | -5.1  | -0.1  | -5.7    | -5.5  |
| Dimer AG08/3.19T//Cs   | -6.1 <sup>a</sup>  | -0.7  | -4.6    | -5.1  | -1.0  | -5.6    | -5.1  |
| Dimer TG03.19T//Gs     | -5.7 <sup>a</sup>  | -0.0  | -3.7    | -4.3  | -0.4  | -4.8    | -4.4  |
| Dimer TG03.19A//Cs     | -5.0 <sup>a</sup>  | 1.3   | -2.7    | -3.6  | 0.6   | -4.3    | -4.1  |
| Dimer GT10/3.15T//Gs   | -5.0 <sup>a</sup>  | 1.7   | -3.9    | -4.3  | 2.3   | -4.5    | -4.5  |
| Dimer GT10/3.15A//Cs   | -5.4 <sup>a</sup>  | 0.9   | -4.0    | -4.5  | 1.0   | -4.9    | -4.9  |
| Dimer AT10/3.26A//Ts   | -6.6 <sup>a</sup>  | -0.0  | -5.1    | -5.4  | 0.3   | -5.8    | -5.7  |
| Dimer TA08/3.16A//Ts   | -6.1 <sup>a</sup>  | 1.4   | -4.9    | -5.4  | 2.2   | -5.8    | -5.5  |
| Dimer AA0/3.24A//As    | -6.2 <sup>a</sup>  | 1.1   | -4.2    | -4.9  | 1.0   | -5.4    | -5.2  |
| Dimer AA0/3.24T//Ts    | -3.9 <sup>a</sup>  | 1.3   | -3.6    | -3.9  | 1.8   | -4.2    | -3.9  |
| Dimer A...T S2         | -8.1 <sup>a</sup>  | 0.5   | -5.5    | -6.0  | 0.8   | -6.4    | -6.4  |
| Dimer G...C S1         | -7.9 <sup>a</sup>  | -1.7  | -4.9    | -5.8  | -2.6  | -6.2    | -5.8  |
| Dimer A...C S          | -6.7 <sup>a</sup>  | 1.4   | -4.0    | -4.8  | 1.2   | -5.1    | -5.4  |
| Dimer T...G S          | -6.2 <sup>a</sup>  | 1.7   | -3.9    | -4.3  | 2.0   | -4.6    | -4.9  |
| Dimer G...C S2         | -7.7 <sup>a</sup>  | -2.3  | -7.2    | -7.8  | -1.8  | -7.7    | -7.8  |
| Dimer A...G S          | -6.5 <sup>a</sup>  | -0.4  | -6.0    | -6.8  | -0.3  | -7.0    | -7.2  |
| Dimer C...G S          | -12.4 <sup>a</sup> | -3.6  | -8.6    | -9.3  | -3.8  | -9.8    | -9.3  |
| Dimer G...C S3         | -11.6 <sup>a</sup> | -4.3  | -9.1    | -9.7  | -4.1  | -9.9    | -9.7  |
| Dimer F30-K46          | -3.1 <sup>a</sup>  | -1.0  | -3.0    | -3.0  | -0.6  | -2.9    | -2.9  |
| Dimer F30-L33          | -5.0 <sup>a</sup>  | -0.9  | -4.7    | -4.8  | -0.2  | -4.7    | -4.7  |
| Dimer F30-Y13          | -3.9 <sup>a</sup>  | -1.0  | -3.9    | -4.0  | -0.6  | -3.9    | -4.0  |
| Dimer F30-F49          | -3.3 <sup>a</sup>  | -0.7  | -3.0    | -3.0  | -0.2  | -2.9    | -2.8  |
| Dimer F30-Y4           | -7.0 <sup>a</sup>  | 0.5   | -4.3    | -4.6  | 0.7   | -4.8    | -5.0  |
| Dimer F49-K46          | -4.8 <sup>a</sup>  | -2.0  | -4.9    | -5.1  | -1.0  | -4.5    | -4.5  |
| Dimer F49-V5           | -6.7 <sup>a</sup>  | -4.0  | -8.4    | -8.7  | -2.4  | -7.7    | -7.7  |
| Dimer F49-W37          | -2.5 <sup>a</sup>  | -0.3  | -2.0    | -2.1  | -0.0  | -2.0    | -2.0  |
| Dimer F49-Y4           | -3.1 <sup>a</sup>  | 0.0   | -3.9    | -3.6  | 1.2   | -3.3    | -3.0  |
| Dimer F49-PB(Y4-V5)    | -2.8 <sup>a</sup>  | -0.4  | -2.6    | -2.7  | -0.0  | -2.5    | -2.6  |

... continued on next page ...

Table S79: ... continued from previous page ...

| Species             | Ref.                | OM2   | OM2-D3T | ODM2   | OM3   | OM3-D3T | ODM3   |
|---------------------|---------------------|-------|---------|--------|-------|---------|--------|
| Dimer F49-PB(V5_C6) | -8.2 <sup>a</sup>   | -4.4  | -8.6    | -8.9   | -3.5  | -8.4    | -8.3   |
| Dimer E47-K6(1IU5)  | -80.7 <sup>a</sup>  | -71.4 | -74.7   | -74.5  | -69.7 | -73.6   | -72.9  |
| Dimer E49-K6(1BQ9)  | -113.3 <sup>a</sup> | -98.5 | -101.7  | -102.6 | -97.3 | -101.1  | -101.8 |
| Dimer E54-K2(1SMM)  | -88.3 <sup>a</sup>  | -85.8 | -87.2   | -87.8  | -85.2 | -86.9   | -87.2  |
| Dimer E50-K30(1BRF) | -60.4 <sup>a</sup>  | -58.5 | -58.8   | -58.7  | -58.5 | -58.7   | -58.5  |
| Dimer E50-K52(1BRF) | -97.1 <sup>a</sup>  | -84.0 | -87.5   | -88.0  | -83.3 | -87.4   | -87.7  |
| Dimer E49-K6(1BRF)  | -74.2 <sup>a</sup>  | -64.8 | -68.0   | -67.1  | -63.8 | -67.7   | -66.6  |

a P.Jurecka, J.Sponer, J.Cerny, and P.Hobza, Phys.Chem.Chem.Phys. 8, 1985 (2006).

Table S80: Benchmark Results for the S7L Set. Interaction Energies (kcal/mol)

| Species                                            | Ref.               | OM2  | OM2-D3T | ODM2  | OM3  | OM3-D3T | ODM3  |
|----------------------------------------------------|--------------------|------|---------|-------|------|---------|-------|
| Single point calculations                          |                    |      |         |       |      |         |       |
| Dimer Naphthalene-Naphthalene (sandwich)           | -4.0 <sup>a</sup>  | 2.3  | -2.4    | -3.0  | 1.7  | -3.6    | -4.0  |
| Dimer Naphthalene-Naphthalene (displaced)          | -6.0 <sup>a</sup>  | 1.7  | -4.0    | -4.7  | 1.4  | -5.3    | -5.7  |
| Dimer Naphthalene-Naphthalene (displaced, rotated) | -6.1 <sup>a</sup>  | 2.2  | -3.9    | -4.7  | 1.8  | -5.4    | -5.8  |
| Dimer Naphthalene-Naphthalene (cross)              | -5.5 <sup>a</sup>  | 2.0  | -3.7    | -4.4  | 1.6  | -5.0    | -5.5  |
| Dimer Coronene-Coronene                            | -20.0 <sup>a</sup> | 3.6  | -13.9   | -15.9 | 3.3  | -17.4   | -18.4 |
| Dimer Decalin-Decalin (haDZ)                       | -4.8 <sup>a</sup>  | -1.0 | -5.7    | -5.6  | 0.2  | -5.1    | -4.9  |
| Dimer Perhydrocoronene-Perhydrocoronene            | -13.6 <sup>a</sup> | -2.8 | -15.7   | -15.3 | 0.8  | -14.0   | -13.5 |
| Full optimizations                                 |                    |      |         |       |      |         |       |
| Dimer Naphthalene-Naphthalene (sandwich)           | -4.0 <sup>a</sup>  | 0.0  | -4.2    | -6.4  | 0.0  | -6.2    | -6.6  |
| Dimer Naphthalene-Naphthalene (displaced)          | -6.0 <sup>a</sup>  | -1.3 | -5.7    | -6.4  | -0.0 | -7.0    | -7.2  |
| Dimer Naphthalene-Naphthalene (displaced, rotated) | -6.1 <sup>a</sup>  | -0.0 | -5.7    | -6.6  | -0.3 | -7.3    | -7.5  |
| Dimer Naphthalene-Naphthalene (cross)              | -5.5 <sup>a</sup>  | 0.0  | -5.5    | -6.6  | 0.0  | -7.3    | -7.5  |
| Dimer Coronene-Coronene                            | -20.0 <sup>a</sup> | -0.0 | -17.2   | -19.8 | -0.7 | -21.2   | -21.6 |
| Dimer Decalin-Decalin (haDZ)                       | -4.8 <sup>a</sup>  | -2.0 | -8.2    | -7.0  | -0.0 | -6.1    | -5.5  |
| Dimer Perhydrocoronene-Perhydrocoronene            | -13.6 <sup>a</sup> | -5.0 | -22.2   | -19.0 | -0.1 | -16.2   | -14.3 |

a T.Janowski and P.Pulay, J.Am.Chem.Soc. 134, 17520 (2012).

Table S81: Benchmark Results for the S30L-CHNOF Set. Interaction Energies (kcal/mol)

| Species | Ref.                | OM2    | OM2-D3T | ODM2   | OM3    | OM3-D3T | ODM3   |
|---------|---------------------|--------|---------|--------|--------|---------|--------|
| # 1     | -29.0 <sup>a</sup>  | -8.1   | -30.5   | -32.4  | -3.1   | -30.1   | -30.5  |
| # 2     | -20.8 <sup>a</sup>  | -2.9   | -19.2   | -20.5  | 0.3    | -19.3   | -19.5  |
| # 3     | -23.5 <sup>a</sup>  | -4.0   | -23.0   | -23.5  | -4.6   | -27.6   | -26.9  |
| # 5     | -29.0 <sup>a</sup>  | -8.1   | -32.4   | -34.8  | -6.0   | -35.1   | -35.1  |
| # 6     | -25.5 <sup>a</sup>  | 1.2    | -21.6   | -24.7  | 3.1    | -24.5   | -25.2  |
| # 7     | -35.1 <sup>a</sup>  | 7.4    | -28.1   | -31.7  | 8.1    | -34.1   | -35.7  |
| # 8     | -36.8 <sup>a</sup>  | 8.4    | -31.7   | -35.8  | 9.0    | -38.5   | -40.4  |
| # 9     | -28.4 <sup>a</sup>  | 1.9    | -29.4   | -31.5  | 4.2    | -32.8   | -33.2  |
| # 10    | -29.8 <sup>a</sup>  | 3.3    | -30.1   | -32.3  | 5.7    | -33.7   | -34.1  |
| # 13    | -30.8 <sup>a</sup>  | -3.7   | -22.5   | -24.3  | -1.5   | -23.7   | -24.5  |
| # 17    | -33.4 <sup>a</sup>  | -20.7  | -35.4   | -34.2  | -13.7  | -31.8   | -29.7  |
| # 18    | -23.3 <sup>a</sup>  | -12.1  | -25.6   | -25.2  | -7.0   | -23.5   | -21.7  |
| # 19    | -17.5 <sup>a</sup>  | -2.6   | -13.8   | -13.9  | -0.0   | -13.0   | -12.2  |
| # 20    | -19.2 <sup>a</sup>  | -2.4   | -18.4   | -18.2  | 1.6    | -17.0   | -15.7  |
| # 21    | -24.2 <sup>a</sup>  | 1.0    | -20.4   | -21.8  | 4.0    | -20.9   | -22.6  |
| # 22    | -42.6 <sup>a</sup>  | -25.4  | -34.9   | -33.3  | -25.0  | -36.6   | -36.1  |
| # 23    | -61.3 <sup>a</sup>  | -43.8  | -50.6   | -52.5  | -46.7  | -54.9   | -63.4  |
| # 24    | -135.5 <sup>a</sup> | -121.2 | -156.3  | -158.5 | -106.9 | -148.2  | -151.3 |
| # 25    | -26.0 <sup>a</sup>  | 1.9    | -24.4   | -26.3  | 4.1    | -26.4   | -27.6  |
| # 26    | -25.8 <sup>a</sup>  | 2.1    | -24.2   | -26.2  | 4.2    | -26.3   | -27.5  |
| # 27    | -82.2 <sup>a</sup>  | -77.5  | -92.7   | -94.3  | -71.1  | -88.9   | -92.5  |
| # 28    | -80.1 <sup>a</sup>  | -76.5  | -89.3   | -90.6  | -70.0  | -84.9   | -88.7  |
| # 29    | -53.5 <sup>a</sup>  | -38.0  | -47.1   | -45.4  | -39.6  | -50.9   | -47.9  |
| # 30    | -49.3 <sup>a</sup>  | -30.7  | -42.7   | -41.8  | -32.5  | -47.0   | -44.8  |

<sup>a</sup> R.Sure and S.Grimme, J.Chem.Theory Comput. 11, 3785 (2015). Correction see: J.Chem.Theory Comput. 11, 5990 (2015).



Table S82: Benchmark Results for the AF6 Set. Folding Energies (kcal/mol)

| Species                        | Ref.              | OM2 | OM2-D3T | ODM2 | OM3 | OM3-D3T | ODM3 |
|--------------------------------|-------------------|-----|---------|------|-----|---------|------|
| Single point calculations      |                   |     |         |      |     |         |      |
| c8 n-alkane bowl G+G+TG+G+ mp2 | 1.6 <sup>a</sup>  | 3.7 | 2.4     | 3.8  | 4.7 | 3.0     | 4.8  |
| c10 n-alkane hairpin mp2/vtz   | 1.4 <sup>a</sup>  | 3.4 | 1.8     | 3.3  | 4.7 | 2.7     | 4.5  |
| c12 n-alkane hairpin mp2/vtz   | 1.0 <sup>a</sup>  | 3.5 | 1.5     | 3.0  | 4.8 | 2.3     | 4.2  |
| c14 n-alkane hairpin mp2/vtz   | 0.1 <sup>a</sup>  | 4.4 | 0.2     | 1.9  | 6.3 | 1.1     | 3.3  |
| c16 n-alkane hairpin mp2/vtz   | -0.6 <sup>a</sup> | 4.1 | -0.8    | 1.0  | 6.2 | 0.2     | 2.4  |
| c18 n-alkane hairpin mp2/vtz   | -1.6 <sup>a</sup> | 4.1 | -1.7    | 0.1  | 6.7 | -0.5    | 1.8  |
| Full optimizations             |                   |     |         |      |     |         |      |
| c8 n-alkane bowl G+G+TG+G+ mp2 | 1.6 <sup>a</sup>  | 3.1 | 2.0     | 3.3  | 3.4 | 2.2     | 3.5  |
| c10 n-alkane hairpin mp2/vtz   | 1.4 <sup>a</sup>  | 3.0 | 1.7     | 3.0  | 3.4 | 2.0     | 3.3  |
| c12 n-alkane hairpin mp2/vtz   | 1.0 <sup>a</sup>  | 3.0 | 0.8     | 2.6  | 3.4 | 1.4     | 3.2  |
| c14 n-alkane hairpin mp2/vtz   | 0.1 <sup>a</sup>  | 3.0 | -0.0    | 1.8  | 3.4 | 0.6     | 2.4  |
| c16 n-alkane hairpin mp2/vtz   | -0.6 <sup>a</sup> | 3.0 | -1.1    | 0.8  | 3.4 | -0.2    | 1.7  |
| c18 n-alkane hairpin mp2/vtz   | -1.6 <sup>a</sup> | 3.0 | -2.1    | -0.1 | 3.4 | -1.0    | 0.9  |

a J.N.Byrd, R.J.Barlett, and J.A.Montgomery Jr., J.Phys.Chem.A 118, 1706 (2014).

Table S83: Benchmark Results for the AF6 Set. Folding Enthalpies (kcal/mol)

| Species                        | Ref.              | OM2 | OM2-D3T | ODM2 | OM3 | OM3-D3T | ODM3 |
|--------------------------------|-------------------|-----|---------|------|-----|---------|------|
| Full optimizations             |                   |     |         |      |     |         |      |
| c8 n-alkane bowl G+G+TG+G+ mp2 | 1.8 <sup>a</sup>  | 3.1 | 2.0     | 3.2  | 3.4 | 2.2     | 3.4  |
| c10 n-alkane hairpin mp2/vtz   | 1.5 <sup>a</sup>  | 3.0 | 1.7     | 2.9  | 3.4 | 2.0     | 3.2  |
| c12 n-alkane hairpin mp2/vtz   | 1.1 <sup>a</sup>  | 3.0 | 0.8     | 2.5  | 3.4 | 1.4     | 2.4  |
| c14 n-alkane hairpin mp2/vtz   | 0.3 <sup>a</sup>  | 3.0 | -0.0    | 1.7  | 3.4 | 0.6     | 2.3  |
| c16 n-alkane hairpin mp2/vtz   | -0.5 <sup>a</sup> | 3.0 | -1.1    | 0.7  | 3.4 | -0.2    | 1.5  |
| c18 n-alkane hairpin mp2/vtz   | -1.4 <sup>a</sup> | 3.0 | -2.1    | -0.2 | 3.4 | -1.0    | 0.8  |

a J.N.Byrd, R.J.Barlett, and J.A.Montgomery Jr., J.Phys.Chem.A 118, 1706 (2014).

Table S84: Benchmark Results for the X40×10-CHNOF Set. Interaction Energies (kcal/mol)

| Molecule                               | Ref.              | OM2  | OM2-D3T | ODM2 | OM3            | OM3-D3T        | ODM3           |
|----------------------------------------|-------------------|------|---------|------|----------------|----------------|----------------|
| Dimer methane-F2_0.80                  | 0.3 <sup>a</sup>  | 0.1  | -0.2    | -0.3 | 0.7            | 0.3            | 0.5            |
| Dimer methane-F2_0.85                  | -0.3 <sup>a</sup> | 0.0  | -0.3    | -0.3 | 0.4            | -0.0           | 0.1            |
| Dimer methane-F2_0.90                  | -0.5 <sup>a</sup> | -0.0 | -0.3    | -0.3 | 0.2            | -0.2           | -0.1           |
| Dimer methane-F2_0.95                  | -0.5 <sup>a</sup> | -0.0 | -0.2    | -0.3 | 0.1            | -0.2           | -0.2           |
| Dimer methane-F2_1.00                  | -0.5 <sup>a</sup> | -0.0 | -0.2    | -0.2 | 0.0            | -0.2           | -0.2           |
| Dimer methane-F2_1.05                  | -0.4 <sup>a</sup> | -0.0 | -0.2    | -0.2 | 0.0            | -0.2           | -0.2           |
| Dimer methane-F2_1.10                  | -0.3 <sup>a</sup> | -0.0 | -0.2    | -0.2 | -0.0           | -0.2           | -0.2           |
| Dimer methane-F2_1.25                  | -0.2 <sup>a</sup> | -0.0 | -0.1    | -0.1 | -0.0           | -0.1           | -0.1           |
| Dimer methane-F2_1.50                  | -0.1 <sup>a</sup> | -0.0 | -0.0    | -0.0 | -0.0           | -0.0           | - <sup>b</sup> |
| Dimer methane-F2_2.00                  | -0.0 <sup>a</sup> | 0.0  | -0.0    | -0.0 | - <sup>b</sup> | - <sup>b</sup> | - <sup>b</sup> |
| Dimer fluoromethane-methane_0.80       | 0.7 <sup>a</sup>  | 1.2  | 0.2     | 0.5  | 2.2            | 0.9            | 1.4            |
| Dimer fluoromethane-methane_0.85       | -0.3 <sup>a</sup> | 0.4  | -0.5    | -0.4 | 1.0            | -0.2           | 0.1            |
| Dimer fluoromethane-methane_0.90       | -0.7 <sup>a</sup> | 0.1  | -0.7    | -0.6 | 0.4            | -0.6           | -0.4           |
| Dimer fluoromethane-methane_0.95       | -0.8 <sup>a</sup> | 0.0  | -0.7    | -0.7 | 0.2            | -0.7           | -0.6           |
| Dimer fluoromethane-methane_1.00       | -0.7 <sup>a</sup> | -0.0 | -0.6    | -0.6 | 0.1            | -0.6           | -0.6           |
| Dimer fluoromethane-methane_1.05       | -0.6 <sup>a</sup> | -0.0 | -0.5    | -0.5 | 0.0            | -0.6           | -0.6           |
| Dimer fluoromethane-methane_1.10       | -0.5 <sup>a</sup> | -0.0 | -0.4    | -0.5 | -0.0           | -0.5           | -0.5           |
| Dimer fluoromethane-methane_1.25       | -0.3 <sup>a</sup> | -0.0 | -0.3    | -0.3 | -0.0           | -0.3           | -0.3           |
| Dimer fluoromethane-methane_1.50       | -0.1 <sup>a</sup> | -0.0 | -0.1    | -0.1 | -0.0           | -0.1           | -0.1           |
| Dimer fluoromethane-methane_2.00       | -0.0 <sup>a</sup> | -0.0 | -0.0    | -0.0 | -0.0           | -0.0           | -0.0           |
| Dimer trifluoromethane-methane_0.80    | 0.3 <sup>a</sup>  | 0.0  | -0.8    | -0.9 | 0.5            | -0.7           | -0.5           |
| Dimer trifluoromethane-methane_0.85    | -0.5 <sup>a</sup> | -0.0 | -0.8    | -0.9 | 0.2            | -0.8           | -0.8           |
| Dimer trifluoromethane-methane_0.90    | -0.7 <sup>a</sup> | -0.0 | -0.7    | -0.8 | 0.0            | -0.8           | -0.8           |
| Dimer trifluoromethane-methane_0.95    | -0.7 <sup>a</sup> | -0.0 | -0.6    | -0.6 | 0.0            | -0.7           | -0.7           |
| Dimer trifluoromethane-methane_1.00    | -0.6 <sup>a</sup> | -0.0 | -0.5    | -0.5 | 0.0            | -0.5           | -0.5           |
| Dimer trifluoromethane-methane_1.05    | -0.5 <sup>a</sup> | -0.0 | -0.4    | -0.4 | 0.0            | -0.4           | -0.4           |
| Dimer trifluoromethane-methane_1.10    | -0.4 <sup>a</sup> | 0.0  | -0.3    | -0.3 | 0.0            | -0.3           | -0.4           |
| Dimer trifluoromethane-methane_1.25    | -0.2 <sup>a</sup> | 0.0  | -0.2    | -0.2 | 0.0            | -0.2           | -0.2           |
| Dimer trifluoromethane-methane_1.50    | -0.1 <sup>a</sup> | 0.0  | -0.1    | -0.1 | 0.0            | -0.1           | -0.1           |
| Dimer trifluoromethane-methane_2.00    | -0.0 <sup>a</sup> | 0.0  | -0.0    | -0.0 | 0.0            | -0.0           | -0.0           |
| Dimer fluoromethane-fluoromethane_0.80 | 0.6 <sup>a</sup>  | -0.0 | -0.6    | -0.5 | 1.2            | 0.4            | 0.8            |
| Dimer fluoromethane-fluoromethane_0.85 | -0.9 <sup>a</sup> | -0.5 | -1.0    | -1.1 | 0.1            | -0.6           | -0.3           |
| Dimer fluoromethane-fluoromethane_0.90 | -1.5 <sup>a</sup> | -0.7 | -1.1    | -1.2 | -0.4           | -1.0           | -0.9           |
| Dimer fluoromethane-fluoromethane_0.95 | -1.7 <sup>a</sup> | -0.7 | -1.1    | -1.2 | -0.6           | -1.1           | -1.1           |
| Dimer fluoromethane-fluoromethane_1.00 | -1.6 <sup>a</sup> | -0.7 | -1.0    | -1.1 | -0.6           | -1.1           | -1.1           |
| Dimer fluoromethane-fluoromethane_1.05 | -1.5 <sup>a</sup> | -0.6 | -0.9    | -1.0 | -0.6           | -1.0           | -1.0           |
| Dimer fluoromethane-fluoromethane_1.10 | -1.3 <sup>a</sup> | -0.6 | -0.9    | -0.9 | -0.6           | -0.9           | -1.0           |
| Dimer fluoromethane-fluoromethane_1.25 | -0.9 <sup>a</sup> | -0.5 | -0.6    | -0.7 | -0.5           | -0.7           | -0.7           |
| Dimer fluoromethane-fluoromethane_1.50 | -0.6 <sup>a</sup> | -0.3 | -0.4    | -0.5 | -0.4           | -0.4           | -0.5           |
| Dimer fluoromethane-fluoromethane_2.00 | -0.3 <sup>a</sup> | -0.2 | -0.2    | -0.2 | -0.2           | -0.2           | -0.2           |
| Dimer benF3-ben_0.80                   | 9.1 <sup>a</sup>  | 4.3  | -1.7    | -1.9 | 7.1            | -1.1           | -0.6           |
| Dimer benF3-ben_0.85                   | 1.9 <sup>a</sup>  | 1.8  | -3.7    | -4.1 | 3.3            | -4.0           | -3.7           |
| Dimer benF3-ben_0.90                   | -1.9 <sup>a</sup> | 0.7  | -4.3    | -4.8 | 1.4            | -4.9           | -4.9           |
| Dimer benF3-ben_0.95                   | -3.7 <sup>a</sup> | 0.2  | -4.2    | -4.7 | 0.5            | -5.0           | -5.0           |
| Dimer benF3-ben_1.00                   | -4.3 <sup>a</sup> | 0.0  | -3.8    | -4.3 | 0.1            | -4.6           | -4.7           |
| Dimer benF3-ben_1.05                   | -4.3 <sup>a</sup> | -0.0 | -3.4    | -3.8 | -0.0           | -4.0           | -4.2           |
| Dimer benF3-ben_1.10                   | -4.0 <sup>a</sup> | -0.0 | -2.9    | -3.2 | -0.1           | -3.5           | -3.6           |
| Dimer benF3-ben_1.25                   | -2.6 <sup>a</sup> | 0.0  | -1.8    | -1.9 | -0.1           | -2.0           | -2.2           |
| Dimer benF3-ben_1.50                   | -1.1 <sup>a</sup> | 0.0  | -0.7    | -0.8 | -0.0           | -0.8           | -0.9           |
| Dimer benF3-ben_2.00                   | -0.2 <sup>a</sup> | 0.0  | -0.1    | -0.1 | -0.0           | -0.1           | -0.1           |
| Dimer benF6-ben_0.80                   | 12.5 <sup>a</sup> | 3.7  | -3.0    | -3.0 | 7.6            | -1.6           | -0.9           |
| Dimer benF6-ben_0.85                   | 2.2 <sup>a</sup>  | 0.2  | -5.8    | -6.2 | 2.5            | -5.6           | -5.2           |
| Dimer benF6-ben_0.90                   | -3.1 <sup>a</sup> | -1.1 | -6.5    | -7.0 | 0.1            | -6.9           | -6.7           |
| Dimer benF6-ben_0.95                   | -5.4 <sup>a</sup> | -1.5 | -6.2    | -6.8 | -0.8           | -6.9           | -6.8           |
| Dimer benF6-ben_1.00                   | -6.0 <sup>a</sup> | -1.5 | -5.7    | -6.1 | -1.2           | -6.3           | -6.3           |
| Dimer benF6-ben_1.05                   | -5.9 <sup>a</sup> | -1.4 | -5.0    | -5.4 | -1.2           | -5.5           | -5.6           |
| Dimer benF6-ben_1.10                   | -5.4 <sup>a</sup> | -1.3 | -4.3    | -4.6 | -1.2           | -4.7           | -4.8           |
| Dimer benF6-ben_1.25                   | -3.5 <sup>a</sup> | -0.9 | -2.7    | -2.9 | -0.8           | -2.9           | -2.9           |
| Dimer benF6-ben_1.50                   | -1.5 <sup>a</sup> | -0.5 | -1.2    | -1.3 | -0.5           | -1.2           | -1.2           |
| Dimer benF6-ben_2.00                   | -0.4 <sup>a</sup> | -0.2 | -0.3    | -0.3 | -0.2           | -0.3           | -0.3           |
| Dimer trifluorometOH-wat_0.80          | -5.2 <sup>a</sup> | -6.8 | -7.6    | -8.4 | -8.4           | -9.5           | -8.7           |
| Dimer trifluorometOH-wat_0.85          | -7.7 <sup>a</sup> | -7.8 | -8.6    | -9.3 | -9.1           | -10.2          | -9.5           |
| Dimer trifluorometOH-wat_0.90          | -9.0 <sup>a</sup> | -8.1 | -8.8    | -9.4 | -9.1           | -10.1          | -9.5           |
| Dimer trifluorometOH-wat_0.95          | -9.6 <sup>a</sup> | -7.8 | -8.5    | -9.0 | -8.7           | -9.6           | -9.0           |

... continued on next page ...

Table S84: ... continued from previous page ...

| Molecule                          | Ref.              | OM2  | OM2-D3T | ODM2 | OM3  | OM3-D3T | ODM3  |
|-----------------------------------|-------------------|------|---------|------|------|---------|-------|
| Dimer trifluorometOH-wat_1.00     | -9.7 <sup>a</sup> | -7.4 | -8.0    | -8.4 | -8.1 | -8.9    | -8.4  |
| Dimer trifluorometOH-wat_1.05     | -9.5 <sup>a</sup> | -6.8 | -7.4    | -7.7 | -7.5 | -8.3    | -7.8  |
| Dimer trifluorometOH-wat_1.10     | -9.1 <sup>a</sup> | -6.2 | -6.7    | -7.0 | -6.9 | -7.6    | -7.2  |
| Dimer trifluorometOH-wat_1.25     | -7.4 <sup>a</sup> | -4.6 | -5.1    | -5.2 | -5.4 | -5.9    | -5.7  |
| Dimer trifluorometOH-wat_1.50     | -4.7 <sup>a</sup> | -3.1 | -3.4    | -3.4 | -3.7 | -4.0    | -3.9  |
| Dimer trifluorometOH-wat_2.00     | -2.0 <sup>a</sup> | -1.5 | -1.6    | -1.7 | -1.8 | -2.0    | -1.9  |
| Dimer HF-mOH_0.80                 | -5.5 <sup>a</sup> | 0.1  | -0.4    | -2.9 | -0.5 | -1.3    | -1.8  |
| Dimer HF-mOH_0.85                 | -7.9 <sup>a</sup> | -2.4 | -2.9    | -4.8 | -2.6 | -3.3    | -3.7  |
| Dimer HF-mOH_0.90                 | -9.1 <sup>a</sup> | -3.8 | -4.3    | -5.8 | -3.6 | -4.4    | -4.6  |
| Dimer HF-mOH_0.95                 | -9.6 <sup>a</sup> | -4.5 | -5.0    | -6.1 | -4.1 | -4.8    | -4.9  |
| Dimer HF-mOH_1.00                 | -9.6 <sup>a</sup> | -4.7 | -5.2    | -6.0 | -4.3 | -4.9    | -5.0  |
| Dimer HF-mOH_1.05                 | -9.3 <sup>a</sup> | -4.7 | -5.1    | -5.7 | -4.2 | -4.8    | -4.9  |
| Dimer HF-mOH_1.10                 | -8.9 <sup>a</sup> | -4.5 | -4.9    | -5.3 | -4.1 | -4.7    | -4.7  |
| Dimer HF-mOH_1.25                 | -7.1 <sup>a</sup> | -3.6 | -4.0    | -4.2 | -3.5 | -4.0    | -4.0  |
| Dimer HF-mOH_1.50                 | -4.6 <sup>a</sup> | -2.5 | -2.7    | -2.8 | -2.6 | -2.9    | -2.9  |
| Dimer HF-mOH_2.00                 | -2.0 <sup>a</sup> | -1.3 | -1.4    | -1.4 | -1.4 | -1.5    | -1.5  |
| Dimer HF-mNH2_0.80                | -3.0 <sup>a</sup> | -1.6 | -2.3    | -6.2 | -6.5 | -7.5    | -12.5 |
| Dimer HF-mNH2_0.85                | -4.8 <sup>a</sup> | -4.5 | -5.2    | -8.0 | -8.6 | -9.6    | -13.8 |
| Dimer HF-mNH2_0.90                | -5.8 <sup>a</sup> | -6.0 | -6.7    | -8.7 | -9.3 | -10.3   | -13.8 |
| Dimer HF-mNH2_0.95                | -6.2 <sup>a</sup> | -6.7 | -7.3    | -8.7 | -9.3 | -10.2   | -13.1 |
| Dimer HF-mNH2_1.00                | -6.4 <sup>a</sup> | -6.7 | -7.4    | -8.3 | -8.7 | -9.6    | -12.0 |
| Dimer HF-mNH2_1.05                | -6.2 <sup>a</sup> | -6.5 | -7.1    | -7.7 | -8.0 | -8.8    | -10.8 |
| Dimer HF-mNH2_1.10                | -6.0 <sup>a</sup> | -6.1 | -6.7    | -7.1 | -7.2 | -8.0    | -9.6  |
| Dimer HF-mNH2_1.25                | -4.8 <sup>a</sup> | -4.9 | -5.3    | -5.5 | -5.2 | -5.9    | -6.7  |
| Dimer HF-mNH2_1.50                | -3.1 <sup>a</sup> | -3.2 | -3.6    | -3.8 | -3.3 | -3.8    | -4.2  |
| Dimer HF-mNH2_2.00                | -1.3 <sup>a</sup> | -1.6 | -1.7    | -1.8 | -1.6 | -1.8    | -2.0  |
| Dimer methanol-fluoromethane_0.80 | -1.7 <sup>a</sup> | 1.1  | 0.4     | -0.5 | 4.0  | 2.9     | 3.6   |
| Dimer methanol-fluoromethane_0.85 | -3.0 <sup>a</sup> | -0.2 | -0.9    | -1.4 | 2.0  | 1.0     | 1.6   |
| Dimer methanol-fluoromethane_0.90 | -3.7 <sup>a</sup> | -0.9 | -1.6    | -1.9 | 0.7  | -0.2    | 0.3   |
| Dimer methanol-fluoromethane_0.95 | -3.9 <sup>a</sup> | -1.3 | -2.0    | -2.1 | -0.2 | -1.0    | -0.6  |
| Dimer methanol-fluoromethane_1.00 | -3.9 <sup>a</sup> | -1.5 | -2.1    | -2.2 | -0.7 | -1.5    | -1.2  |
| Dimer methanol-fluoromethane_1.05 | -3.7 <sup>a</sup> | -1.5 | -2.1    | -2.2 | -1.0 | -1.8    | -1.5  |
| Dimer methanol-fluoromethane_1.10 | -3.5 <sup>a</sup> | -1.5 | -2.0    | -2.1 | -1.2 | -1.9    | -1.7  |
| Dimer methanol-fluoromethane_1.25 | -2.6 <sup>a</sup> | -1.2 | -1.6    | -1.7 | -1.2 | -1.7    | -1.7  |
| Dimer methanol-fluoromethane_1.50 | -1.6 <sup>a</sup> | -0.8 | -1.1    | -1.1 | -0.9 | -1.2    | -1.2  |
| Dimer methanol-fluoromethane_2.00 | -0.6 <sup>a</sup> | -0.4 | -0.5    | -0.5 | -0.5 | -0.5    | -0.5  |

<sup>a</sup> J.Rezac, K.E.Riley, and P.Hobza, *J.Chem.Theory Comput.* 8, 4285-4292 (2012); M.K.Kesharwani, D.Manna, N.Sylvetsky, J.M.L.Martin, *J.Phys.Chem.A*, 122, 2184-2197 (2018). <sup>b</sup> Calculation could not be converged.

Table S85: Benchmark Results for the VEE Set. Vertical Excitation Energies (eV)

| Species                                         | Ref.              | OM2  | OM2-D3T | ODM2 | OM3  | OM3-D3T | ODM3 |
|-------------------------------------------------|-------------------|------|---------|------|------|---------|------|
| Ethene: 1 1B1u, $\pi \rightarrow \pi^*$         | 7.80 <sup>a</sup> | 7.78 | 7.78    | 7.91 | 7.85 | 7.85    | 7.95 |
| Ethene: 1 3B1u, $\pi \rightarrow \pi^*$         | 4.50 <sup>a</sup> | 4.14 | 4.14    | 4.26 | 4.16 | 4.16    | 4.24 |
| E-Butadiene: 2 1Ag, $\pi \rightarrow \pi^*$     | 6.55 <sup>a</sup> | 5.96 | 5.96    | 6.11 | 5.98 | 5.98    | 6.08 |
| E-Butadiene: 1 1Bu, $\pi \rightarrow \pi^*$     | 6.18 <sup>a</sup> | 6.22 | 6.22    | 6.31 | 6.26 | 6.26    | 6.33 |
| E-Butadiene: 1 3Ag, $\pi \rightarrow \pi^*$     | 5.08 <sup>a</sup> | 4.56 | 4.56    | 4.68 | 4.59 | 4.59    | 4.66 |
| E-Butadiene: 1 3Bu, $\pi \rightarrow \pi^*$     | 3.20 <sup>a</sup> | 3.04 | 3.04    | 3.13 | 3.04 | 3.04    | 3.10 |
| Hexatriene: 2 1Ag, $\pi \rightarrow \pi^*$      | 5.09 <sup>a</sup> | 4.86 | 4.86    | 4.98 | 4.86 | 4.86    | 4.95 |
| Hexatriene: 1 1Bu, $\pi \rightarrow \pi^*$      | 5.10 <sup>a</sup> | 5.33 | 5.33    | 5.40 | 5.36 | 5.36    | 5.41 |
| Hexatriene: 1 3Ag, $\pi \rightarrow \pi^*$      | 4.15 <sup>a</sup> | 3.80 | 3.80    | 3.90 | 3.81 | 3.81    | 3.88 |
| Hexatriene: 1 3Bu, $\pi \rightarrow \pi^*$      | 2.40 <sup>a</sup> | 2.46 | 2.46    | 2.53 | 2.45 | 2.45    | 2.50 |
| Octatetraene: 2 1Ag, $\pi \rightarrow \pi^*$    | 4.47 <sup>a</sup> | 4.14 | 4.14    | 4.25 | 4.13 | 4.13    | 4.22 |
| Octatetraene: 1 1Bu, $\pi \rightarrow \pi^*$    | 4.66 <sup>a</sup> | 4.77 | 4.77    | 4.83 | 4.79 | 4.79    | 4.84 |
| Octatetraene: 1 3Ag, $\pi \rightarrow \pi^*$    | 3.55 <sup>a</sup> | 3.23 | 3.23    | 3.32 | 3.24 | 3.24    | 3.30 |
| Octatetraene: 1 3Bu, $\pi \rightarrow \pi^*$    | 2.20 <sup>a</sup> | 2.12 | 2.12    | 2.18 | 2.11 | 2.11    | 2.16 |
| Cyclopropene: 1 1B1, $\sigma \rightarrow \pi^*$ | 6.67 <sup>a</sup> | 5.75 | 5.75    | 5.90 | 5.93 | 5.93    | 6.10 |
| Cyclopropene: 1 1B2, $\pi \rightarrow \pi^*$    | 6.68 <sup>a</sup> | 6.42 | 6.42    | 6.62 | 6.39 | 6.39    | 6.61 |
| Cyclopropene: 1 3B2, $\pi \rightarrow \pi^*$    | 4.28 <sup>a</sup> | 3.80 | 3.80    | 3.95 | 3.72 | 3.72    | 3.86 |
| Cyclopropene: 1 3B1, $\sigma \rightarrow \pi^*$ | 6.40 <sup>a</sup> | 5.48 | 5.48    | 5.63 | 5.65 | 5.65    | 5.80 |
| Cyclopentadiene: 2 1A1, $\pi \rightarrow \pi^*$ | 6.28 <sup>a</sup> | 5.60 | 5.60    | 5.74 | 5.59 | 5.59    | 5.71 |
| Cyclopentadiene: 1 1B2, $\pi \rightarrow \pi^*$ | 5.55 <sup>a</sup> | 5.07 | 5.07    | 5.14 | 5.09 | 5.09    | 5.17 |
| Cyclopentadiene: 1 3A1, $\pi \rightarrow \pi^*$ | 5.09 <sup>a</sup> | 4.30 | 4.30    | 4.42 | 4.31 | 4.31    | 4.40 |
| Cyclopentadiene: 1 3B2, $\pi \rightarrow \pi^*$ | 3.26 <sup>a</sup> | 2.87 | 2.87    | 2.94 | 2.86 | 2.86    | 2.93 |
| Norbornadiene: 1 1A2, $\pi \rightarrow \pi^*$   | 5.37 <sup>a</sup> | 6.00 | 6.00    | 6.07 | 6.06 | 6.06    | 6.15 |
| Norbornadiene: 1 1B2, $\pi \rightarrow \pi^*$   | 6.21 <sup>a</sup> | 6.34 | 6.34    | 6.40 | 6.46 | 6.46    | 6.55 |
| Norbornadiene: 1 3A2, $\pi \rightarrow \pi^*$   | 3.68 <sup>a</sup> | 4.27 | 4.27    | 4.38 | 4.26 | 4.26    | 4.32 |
| Norbornadiene: 1 3B2, $\pi \rightarrow \pi^*$   | 4.16 <sup>a</sup> | 4.10 | 4.10    | 4.22 | 4.07 | 4.07    | 4.11 |
| Benzene: 1 1B2u, $\pi \rightarrow \pi^*$        | 5.08 <sup>a</sup> | 4.48 | 4.48    | 4.59 | 4.51 | 4.51    | 4.58 |
| Benzene: 1 1B1u, $\pi \rightarrow \pi^*$        | 6.54 <sup>a</sup> | 5.94 | 5.94    | 6.06 | 6.03 | 6.03    | 6.10 |
| Benzene: 1 1E1u, $\pi \rightarrow \pi^*$        | 7.13 <sup>a</sup> | 7.16 | 7.16    | 7.27 | 7.20 | 7.20    | 7.27 |
| Benzene: 1 1E2g, $\pi \rightarrow \pi^*$        | 8.15 <sup>a</sup> | 7.19 | 7.19    | 7.36 | 7.22 | 7.22    | 7.33 |
| Benzene: 1 3B1u, $\pi \rightarrow \pi^*$        | 4.15 <sup>a</sup> | 3.74 | 3.74    | 3.84 | 3.76 | 3.76    | 3.82 |
| Benzene: 1 3E1u, $\pi \rightarrow \pi^*$        | 4.86 <sup>a</sup> | 4.54 | 4.54    | 4.65 | 4.57 | 4.57    | 4.63 |
| Benzene: 1 3B2u, $\pi \rightarrow \pi^*$        | 5.88 <sup>a</sup> | 5.80 | 5.80    | 5.90 | 5.85 | 5.85    | 5.91 |
| Benzene: 1 3E2g, $\pi \rightarrow \pi^*$        | 7.51 <sup>a</sup> | 6.30 | 6.30    | 6.46 | 6.34 | 6.34    | 6.44 |
| Naphthalene: 2 1Ag, $\pi \rightarrow \pi^*$     | 5.90 <sup>a</sup> | 5.23 | 5.23    | 5.36 | 5.27 | 5.27    | 5.35 |
| Naphthalene: 3 1Ag, $\pi \rightarrow \pi^*$     | 6.49 <sup>a</sup> | 6.03 | 6.03    | 6.17 | 6.05 | 6.05    | 6.14 |
| Naphthalene: 1 1B2u, $\pi \rightarrow \pi^*$    | 4.82 <sup>a</sup> | 4.83 | 4.83    | 4.91 | 4.87 | 4.87    | 4.93 |
| Naphthalene: 2 1B2u, $\pi \rightarrow \pi^*$    | 6.36 <sup>a</sup> | 6.23 | 6.23    | 6.34 | 6.28 | 6.28    | 6.35 |
| Naphthalene: 1 1B3u, $\pi \rightarrow \pi^*$    | 4.25 <sup>a</sup> | 3.81 | 3.81    | 3.91 | 3.84 | 3.84    | 3.90 |
| Naphthalene: 2 1B3u, $\pi \rightarrow \pi^*$    | 6.11 <sup>a</sup> | 6.16 | 6.16    | 6.24 | 6.18 | 6.18    | 6.24 |
| Naphthalene: 1 1B1g, $\pi \rightarrow \pi^*$    | 5.75 <sup>a</sup> | 5.74 | 5.74    | 5.87 | 5.76 | 5.76    | 5.85 |
| Naphthalene: 2 1B1g, $\pi \rightarrow \pi^*$    | 6.46 <sup>a</sup> | 6.24 | 6.24    | 6.35 | 6.31 | 6.31    | 6.39 |
| Naphthalene: 1 3Ag, $\pi \rightarrow \pi^*$     | 5.42 <sup>a</sup> | 4.90 | 4.90    | 5.02 | 4.93 | 4.93    | 5.00 |
| Naphthalene: 2 3Ag, $\pi \rightarrow \pi^*$     | 6.17 <sup>a</sup> | 6.51 | 6.51    | 6.63 | 6.58 | 6.58    | 6.65 |
| Naphthalene: 3 3Ag, $\pi \rightarrow \pi^*$     | 6.65 <sup>a</sup> | 5.76 | 5.76    | 5.90 | 5.79 | 5.79    | 5.87 |
| Naphthalene: 1 3B2u, $\pi \rightarrow \pi^*$    | 3.09 <sup>a</sup> | 2.89 | 2.89    | 2.97 | 2.90 | 2.90    | 2.95 |
| Naphthalene: 2 3B2u, $\pi \rightarrow \pi^*$    | 4.56 <sup>a</sup> | 4.28 | 4.28    | 4.38 | 4.31 | 4.31    | 4.37 |
| Naphthalene: 1 3B3u, $\pi \rightarrow \pi^*$    | 4.09 <sup>a</sup> | 3.91 | 3.91    | 4.00 | 3.94 | 3.94    | 4.00 |
| Naphthalene: 2 3B3u, $\pi \rightarrow \pi^*$    | 4.92 <sup>a</sup> | 4.95 | 4.95    | 5.03 | 4.99 | 4.99    | 5.04 |
| Naphthalene: 1 3B1g, $\pi \rightarrow \pi^*$    | 4.42 <sup>a</sup> | 4.07 | 4.07    | 4.17 | 4.09 | 4.09    | 4.15 |
| Naphthalene: 2 3B1g, $\pi \rightarrow \pi^*$    | 6.12 <sup>a</sup> | 6.49 | 6.49    | 6.60 | 6.52 | 6.52    | 6.59 |
| Naphthalene: 3 3B1g, $\pi \rightarrow \pi^*$    | 6.67 <sup>a</sup> | 5.79 | 5.79    | 5.93 | 5.83 | 5.83    | 5.91 |
| Furan: 2 1A1, $\pi \rightarrow \pi^*$           | 6.57 <sup>a</sup> | 5.43 | 5.43    | 5.61 | 5.51 | 5.51    | 5.64 |
| Furan: 3 1A1, $\pi \rightarrow \pi^*$           | 8.13 <sup>a</sup> | 7.47 | 7.47    | 7.67 | 7.62 | 7.62    | 7.76 |
| Furan: 1 1B2, $\pi \rightarrow \pi^*$           | 6.32 <sup>a</sup> | 5.82 | 5.82    | 5.93 | 5.88 | 5.88    | 5.93 |
| Furan: 1 3A1, $\pi \rightarrow \pi^*$           | 5.43 <sup>a</sup> | 4.54 | 4.54    | 4.67 | 4.59 | 4.59    | 4.66 |
| Furan: 1 3B2, $\pi \rightarrow \pi^*$           | 4.11 <sup>a</sup> | 3.50 | 3.50    | 3.58 | 3.53 | 3.53    | 3.55 |
| Pyrrole: 2 1A1, $\pi \rightarrow \pi^*$         | 6.37 <sup>a</sup> | 5.28 | 5.28    | 5.43 | 5.29 | 5.29    | 5.44 |
| Pyrrole: 3 1A1, $\pi \rightarrow \pi^*$         | 7.91 <sup>a</sup> | 7.18 | 7.18    | 7.35 | 7.16 | 7.16    | 7.32 |
| Pyrrole: 2 1B2, $\pi \rightarrow \pi^*$         | 6.57 <sup>a</sup> | 5.86 | 5.86    | 5.99 | 5.94 | 5.94    | 5.96 |
| Pyrrole: 1 3A1, $\pi \rightarrow \pi^*$         | 5.42 <sup>a</sup> | 4.59 | 4.59    | 4.71 | 4.64 | 4.64    | 4.69 |
| Pyrrole: 1 3B2, $\pi \rightarrow \pi^*$         | 4.44 <sup>a</sup> | 3.76 | 3.76    | 3.80 | 3.89 | 3.89    | 3.82 |
| Imidazole: 2 1A', $\pi \rightarrow \pi^*$       | 6.25 <sup>a</sup> | 5.59 | 5.59    | 5.73 | 5.85 | 5.85    | 5.80 |
| Imidazole: 3 1A', $\pi \rightarrow \pi^*$       | 6.73 <sup>a</sup> | 6.04 | 6.04    | 6.19 | 6.16 | 6.16    | 6.17 |

... continued on next page ...

Table S85: ... continued from previous page ...

| Species                                              | Ref.              | OM2  | OM2-D3T | ODM2 | OM3  | OM3-D3T | ODM3 |
|------------------------------------------------------|-------------------|------|---------|------|------|---------|------|
| Imidazole: 1 1A", $n \rightarrow \pi^*$              | 6.65 <sup>a</sup> | 6.00 | 6.00    | 6.10 | 6.08 | 6.08    | 6.23 |
| Imidazole: 1 3A', $\pi \rightarrow \pi^*$            | 4.65 <sup>a</sup> | 3.95 | 3.95    | 4.00 | 4.06 | 4.06    | 4.00 |
| Imidazole: 2 3A', $\pi \rightarrow \pi^*$            | 5.64 <sup>a</sup> | 4.95 | 4.95    | 5.07 | 5.27 | 5.27    | 5.10 |
| Imidazole: 3 3A', $\pi \rightarrow \pi^*$            | 6.38 <sup>a</sup> | 5.69 | 5.69    | 5.90 | 5.99 | 5.99    | 6.02 |
| Imidazole: 1 3A", $n \rightarrow \pi^*$              | 6.25 <sup>a</sup> | 5.60 | 5.60    | 5.71 | 5.70 | 5.70    | 5.81 |
| Pyridine: 2 1A1, $\pi \rightarrow \pi^*$             | 6.26 <sup>a</sup> | 6.11 | 6.11    | 6.21 | 6.25 | 6.25    | 6.28 |
| Pyridine: 3 1A1, $\pi \rightarrow \pi^*$             | 7.18 <sup>a</sup> | 7.43 | 7.43    | 7.53 | 7.63 | 7.63    | 7.63 |
| Pyridine: 1 1A2, $n \rightarrow \pi^*$               | 5.11 <sup>a</sup> | 5.06 | 5.06    | 5.17 | 4.84 | 4.84    | 5.18 |
| Pyridine: 1 1B2, $\pi \rightarrow \pi^*$             | 4.85 <sup>a</sup> | 4.65 | 4.65    | 4.75 | 4.83 | 4.83    | 4.77 |
| Pyridine: 2 1B2, $\pi \rightarrow \pi^*$             | 7.27 <sup>a</sup> | 7.48 | 7.48    | 7.64 | 7.62 | 7.62    | 7.65 |
| Pyridine: 1 1B1, $n \rightarrow \pi^*$               | 4.59 <sup>a</sup> | 4.85 | 4.85    | 4.87 | 4.86 | 4.86    | 4.89 |
| Pyridine: 1 3A1, $\pi \rightarrow \pi^*$             | 4.06 <sup>a</sup> | 3.86 | 3.86    | 3.97 | 3.94 | 3.94    | 3.97 |
| Pyridine: 2 3A1, $\pi \rightarrow \pi^*$             | 4.91 <sup>a</sup> | 4.74 | 4.74    | 4.85 | 4.97 | 4.97    | 4.91 |
| Pyridine: 1 3A2, $n \rightarrow \pi^*$               | 5.28 <sup>a</sup> | 4.96 | 4.96    | 5.08 | 4.75 | 4.75    | 5.09 |
| Pyridine: 1 3B2, $\pi \rightarrow \pi^*$             | 4.64 <sup>a</sup> | 4.66 | 4.66    | 4.73 | 4.83 | 4.83    | 4.76 |
| Pyridine: 2 3B2, $\pi \rightarrow \pi^*$             | 6.08 <sup>a</sup> | 5.97 | 5.97    | 6.09 | 6.17 | 6.17    | 6.20 |
| Pyridine: 1 3B1, $n \rightarrow \pi^*$               | 4.25 <sup>a</sup> | 4.48 | 4.48    | 4.50 | 4.47 | 4.47    | 4.52 |
| Pyrazine: 1 1Au, $n \rightarrow \pi^*$               | 4.98 <sup>a</sup> | 4.12 | 4.12    | 4.25 | 3.89 | 3.89    | 4.34 |
| Pyrazine: 1 1B1g, $n \rightarrow \pi^*$              | 6.69 <sup>a</sup> | 6.54 | 6.54    | 6.73 | 6.32 | 6.32    | 6.63 |
| Pyrazine: 1 1B1u, $\pi \rightarrow \pi^*$            | 6.83 <sup>a</sup> | 6.22 | 6.22    | 6.33 | 6.35 | 6.35    | 6.38 |
| Pyrazine: 2 1B1u, $\pi \rightarrow \pi^*$            | 7.86 <sup>a</sup> | 8.06 | 8.06    | 8.16 | 8.68 | 8.68    | 8.32 |
| Pyrazine: 1 1B2g, $n \rightarrow \pi^*$              | 5.65 <sup>a</sup> | 5.78 | 5.78    | 5.79 | 5.86 | 5.86    | 5.73 |
| Pyrazine: 1 1B2u, $\pi \rightarrow \pi^*$            | 4.97 <sup>a</sup> | 4.76 | 4.76    | 4.82 | 5.20 | 5.20    | 4.86 |
| Pyrazine: 2 1B2u, $\pi \rightarrow \pi^*$            | 7.81 <sup>a</sup> | 7.67 | 7.67    | 7.85 | 8.12 | 8.12    | 7.97 |
| Pyrazine: 1 1B3u, $n \rightarrow \pi^*$              | 4.13 <sup>a</sup> | 3.81 | 3.81    | 3.75 | 4.04 | 4.04    | 3.88 |
| Pyrimidine: 2 1A1, $\pi \rightarrow \pi^*$           | 6.82 <sup>a</sup> | 6.36 | 6.36    | 6.45 | 6.62 | 6.62    | 6.55 |
| Pyrimidine: 1 1A2, $n \rightarrow \pi^*$             | 4.85 <sup>a</sup> | 4.54 | 4.54    | 4.66 | 4.40 | 4.40    | 4.69 |
| Pyrimidine: 1 1B2, $\pi \rightarrow \pi^*$           | 5.34 <sup>a</sup> | 4.86 | 4.86    | 4.98 | 5.22 | 5.22    | 5.06 |
| Pyrimidine: 1 1B1, $n \rightarrow \pi^*$             | 4.43 <sup>a</sup> | 4.34 | 4.34    | 4.35 | 4.38 | 4.38    | 4.40 |
| Pyridazine: 2 1A1, $\pi \rightarrow \pi^*$           | 5.20 <sup>a</sup> | 4.74 | 4.74    | 4.85 | 5.08 | 5.08    | 4.92 |
| Pyridazine: 1 1A2, $n \rightarrow \pi^*$             | 4.44 <sup>a</sup> | 4.70 | 4.70    | 4.76 | 4.21 | 4.21    | 4.66 |
| Pyridazine: 2 1A2, $n \rightarrow \pi^*$             | 5.66 <sup>a</sup> | 5.38 | 5.38    | 5.44 | 5.57 | 5.57    | 5.38 |
| Pyridazine: 1 1B1, $n \rightarrow \pi^*$             | 3.85 <sup>a</sup> | 4.37 | 4.37    | 4.30 | 4.14 | 4.14    | 4.25 |
| s-Triazine: 1 1A1", $n \rightarrow \pi^*$            | 4.70 <sup>a</sup> | 4.51 | 4.51    | 4.73 | 4.66 | 4.66    | 4.70 |
| s-Triazine: 1 1E", $n \rightarrow \pi^*$             | 4.75 <sup>a</sup> | 4.40 | 4.40    | 4.66 | 4.58 | 4.58    | 4.59 |
| s-Triazine: 1 1A2", $n \rightarrow \pi^*$            | 4.71 <sup>a</sup> | 4.24 | 4.24    | 4.52 | 4.43 | 4.43    | 4.43 |
| s-Triazine: 1 1A2', $\pi \rightarrow \pi^*$          | 5.71 <sup>a</sup> | 5.12 | 5.12    | 5.28 | 5.69 | 5.69    | 5.44 |
| s-Tetrazine: 1 1Au, $n \rightarrow \pi^*$            | 3.78 <sup>a</sup> | 3.55 | 3.55    | 3.67 | 3.08 | 3.08    | 3.59 |
| s-Tetrazine: 2 1Au, $n \rightarrow \pi^*$            | 5.39 <sup>a</sup> | 4.65 | 4.65    | 4.71 | 5.06 | 5.06    | 4.73 |
| s-Tetrazine: 1 1B1g, $n \rightarrow \pi^*$           | 4.87 <sup>a</sup> | 6.15 | 6.15    | 5.99 | 6.49 | 6.49    | 6.18 |
| s-Tetrazine: 1 1B2g, $n \rightarrow \pi^*$           | 5.28 <sup>a</sup> | 5.33 | 5.33    | 5.25 | 6.11 | 6.11    | 5.41 |
| s-Tetrazine: 1 1B2u, $\pi \rightarrow \pi^*$         | 5.08 <sup>a</sup> | 4.88 | 4.88    | 4.92 | 5.74 | 5.74    | 5.12 |
| s-Tetrazine: 1 1B3g, $n, n \rightarrow \pi^*, \pi^*$ | 5.76 <sup>a</sup> | 6.28 | 6.28    | 6.21 | 5.88 | 5.88    | 6.24 |
| s-Tetrazine: 1 1B3u, $n \rightarrow \pi^*$           | 2.46 <sup>a</sup> | 2.83 | 2.83    | 2.66 | 2.88 | 2.88    | 2.72 |
| s-Tetrazine: 1 3Au, $n \rightarrow \pi^*$            | 3.49 <sup>a</sup> | 3.31 | 3.31    | 3.45 | 2.87 | 2.87    | 3.36 |
| s-Tetrazine: 2 3Au, $n \rightarrow \pi^*$            | 4.96 <sup>a</sup> | 4.40 | 4.40    | 4.47 | 4.79 | 4.79    | 4.45 |
| s-Tetrazine: 1 3B1g, $n \rightarrow \pi^*$           | 4.18 <sup>a</sup> | 4.85 | 4.85    | 4.78 | 4.78 | 4.78    | 4.91 |
| s-Tetrazine: 1 3B1u, $\pi \rightarrow \pi^*$         | 4.36 <sup>a</sup> | 4.07 | 4.07    | 4.13 | 4.74 | 4.74    | 4.37 |
| s-Tetrazine: 2 3B1u, $\pi \rightarrow \pi^*$         | 5.32 <sup>a</sup> | 5.07 | 5.07    | 5.18 | 6.00 | 6.00    | 5.36 |
| s-Tetrazine: 1 3B2g, $n \rightarrow \pi^*$           | 4.89 <sup>a</sup> | 5.04 | 5.04    | 4.98 | 5.66 | 5.66    | 5.10 |
| s-Tetrazine: 1 3B2u, $\pi \rightarrow \pi^*$         | 4.39 <sup>a</sup> | 4.76 | 4.76    | 4.68 | 5.62 | 5.62    | 4.89 |
| s-Tetrazine: 1 3B3u, $n \rightarrow \pi^*$           | 1.87 <sup>a</sup> | 2.35 | 2.35    | 2.18 | 2.36 | 2.36    | 2.25 |
| Formaldehyde: 1 1A2, $n \rightarrow \pi^*$           | 3.88 <sup>a</sup> | 3.55 | 3.55    | 3.70 | 3.59 | 3.59    | 3.73 |
| Formaldehyde: 1 1B1, $\sigma \rightarrow \pi^*$      | 9.04 <sup>a</sup> | 7.93 | 7.93    | 8.21 | 9.01 | 9.01    | 9.27 |
| Formaldehyde: 3 1A1, $\pi \rightarrow \pi^*$         | 9.29 <sup>a</sup> | 9.23 | 9.23    | 9.39 | 9.89 | 9.89    | 9.79 |
| Formaldehyde: 1 3A2, $n \rightarrow \pi^*$           | 3.50 <sup>a</sup> | 3.23 | 3.23    | 3.39 | 3.24 | 3.24    | 3.39 |
| Formaldehyde: 1 3A1, $\pi \rightarrow \pi^*$         | 5.87 <sup>a</sup> | 5.63 | 5.63    | 5.81 | 6.07 | 6.07    | 5.99 |
| Acetone: 2 1A1, $\pi \rightarrow \pi^*$              | 8.90 <sup>a</sup> | 8.08 | 8.08    | 8.27 | 8.51 | 8.51    | 8.57 |
| Acetone: 1 1A2, $n \rightarrow \pi^*$                | 4.38 <sup>a</sup> | 3.98 | 3.98    | 4.12 | 4.05 | 4.05    | 4.11 |
| Acetone: 2 1B1, $\sigma \rightarrow \pi^*$           | 9.04 <sup>a</sup> | 7.71 | 7.71    | 8.03 | 8.34 | 8.34    | 8.58 |
| Acetone: 1 3A1, $\pi \rightarrow \pi^*$              | 6.07 <sup>a</sup> | 5.45 | 5.45    | 5.66 | 5.79 | 5.79    | 5.78 |
| Acetone: 1 3A2, $n \rightarrow \pi^*$                | 4.05 <sup>a</sup> | 3.74 | 3.74    | 3.89 | 3.79 | 3.79    | 3.86 |
| p-Benzoquinone: 1 1Au, $n \rightarrow \pi^*$         | 2.86 <sup>a</sup> | 3.35 | 3.35    | 3.43 | 3.37 | 3.37    | 3.39 |
| p-Benzoquinone: 1 1B1g, $n \rightarrow \pi^*$        | 2.74 <sup>a</sup> | 2.64 | 2.64    | 2.71 | 2.58 | 2.58    | 2.61 |
| p-Benzoquinone: 1 1B1u, $\pi \rightarrow \pi^*$      | 5.47 <sup>a</sup> | 5.52 | 5.52    | 5.59 | 5.71 | 5.71    | 5.70 |

... continued on next page ...

Table S85: ... continued from previous page ...

| Species                                         | Ref.              | OM2  | OM2-D3T | ODM2 | OM3  | OM3-D3T | ODM3 |
|-------------------------------------------------|-------------------|------|---------|------|------|---------|------|
| p-Benzoquinone: 1 1B3g, $\pi \rightarrow \pi^*$ | 4.44 <sup>a</sup> | 4.62 | 4.62    | 4.65 | 4.68 | 4.68    | 4.65 |
| p-Benzoquinone: 2 1B3g, $\pi \rightarrow \pi^*$ | 7.16 <sup>a</sup> | 6.73 | 6.73    | 6.94 | 6.93 | 6.93    | 7.01 |
| p-Benzoquinone: 1 1B3u, $n \rightarrow \pi^*$   | 5.55 <sup>a</sup> | 5.34 | 5.34    | 5.51 | 5.31 | 5.31    | 5.45 |
| p-Benzoquinone: 1 3Au, $n \rightarrow \pi^*$    | 2.61 <sup>a</sup> | 3.21 | 3.21    | 3.29 | 3.23 | 3.23    | 3.25 |
| p-Benzoquinone: 1 3B1g, $n \rightarrow \pi^*$   | 2.50 <sup>a</sup> | 2.50 | 2.50    | 2.57 | 2.42 | 2.42    | 2.46 |
| p-Benzoquinone: 1 3B1u, $\pi \rightarrow \pi^*$ | 3.02 <sup>a</sup> | 2.79 | 2.79    | 2.89 | 2.91 | 2.91    | 2.92 |
| p-Benzoquinone: 1 3B3g, $\pi \rightarrow \pi^*$ | 3.37 <sup>a</sup> | 3.32 | 3.32    | 3.37 | 3.34 | 3.34    | 3.36 |
| Formamide: 1 1A'', $n \rightarrow \pi^*$        | 5.55 <sup>a</sup> | 4.56 | 4.56    | 4.80 | 4.82 | 4.82    | 5.07 |
| Formamide: 2 1A', $\pi \rightarrow \pi^*$       | 7.35 <sup>a</sup> | 6.71 | 6.71    | 7.08 | 7.07 | 7.07    | 7.14 |
| Formamide: 1 3A'', $n \rightarrow \pi^*$        | 5.28 <sup>a</sup> | 4.34 | 4.34    | 4.58 | 4.58 | 4.58    | 4.83 |
| Formamide: 1 3A', $\pi \rightarrow \pi^*$       | 5.69 <sup>a</sup> | 4.77 | 4.77    | 5.15 | 4.98 | 4.98    | 5.18 |
| Acetamide: 2 1A', $\pi \rightarrow \pi^*$       | 7.14 <sup>a</sup> | 6.63 | 6.63    | 7.00 | 6.95 | 6.95    | 7.01 |
| Acetamide: 1 1A'', $n \rightarrow \pi^*$        | 5.62 <sup>a</sup> | 4.75 | 4.75    | 5.01 | 4.98 | 4.98    | 5.17 |
| Acetamide: 1 3A', $\pi \rightarrow \pi^*$       | 5.71 <sup>a</sup> | 4.86 | 4.86    | 5.24 | 5.07 | 5.07    | 5.24 |
| Acetamide: 1 3A'', $n \rightarrow \pi^*$        | 5.35 <sup>a</sup> | 4.54 | 4.54    | 4.80 | 4.76 | 4.76    | 4.95 |
| Propanamide: 2 1A', $\pi \rightarrow \pi^*$     | 7.09 <sup>a</sup> | 6.64 | 6.64    | 7.00 | 6.94 | 6.94    | 7.01 |
| Propanamide: 1 1A'', $n \rightarrow \pi^*$      | 5.65 <sup>a</sup> | 4.85 | 4.85    | 5.11 | 5.06 | 5.06    | 5.24 |
| Propanamide: 1 3A', $\pi \rightarrow \pi^*$     | 6.08 <sup>a</sup> | 4.87 | 4.87    | 5.24 | 5.07 | 5.07    | 5.25 |
| Propanamide: 1 3A'', $n \rightarrow \pi^*$      | 5.38 <sup>a</sup> | 4.61 | 4.61    | 4.87 | 4.81 | 4.81    | 4.99 |
| Cytosine: 2 1A', $\pi \rightarrow \pi^*$        | 4.69 <sup>b</sup> | 4.21 | 4.21    | 4.44 | 4.39 | 4.39    | 4.56 |
| Cytosine: 3 1A', $\pi \rightarrow \pi^*$        | 5.60 <sup>b</sup> | 5.00 | 5.00    | 5.30 | 5.05 | 5.05    | 5.33 |
| Cytosine: 1 1A'', $n \rightarrow \pi^*$         | 5.18 <sup>b</sup> | 4.24 | 4.24    | 4.43 | 4.41 | 4.41    | 4.57 |
| Cytosine: 2 1A'', $n \rightarrow \pi^*$         | 5.82 <sup>b</sup> | 4.84 | 4.84    | 5.13 | 4.96 | 4.96    | 5.27 |
| Thymine: 2 1A', $\pi \rightarrow \pi^*$         | 5.15 <sup>b</sup> | 4.81 | 4.81    | 5.08 | 4.81 | 4.81    | 5.05 |
| Thymine: 3 1A', $\pi \rightarrow \pi^*$         | 6.26 <sup>b</sup> | 5.56 | 5.56    | 5.90 | 5.65 | 5.65    | 5.94 |
| Thymine: 4 1A', $\pi \rightarrow \pi^*$         | 6.46 <sup>b</sup> | 5.73 | 5.73    | 6.09 | 5.90 | 5.90    | 6.13 |
| Thymine: 1 1A'', $n \rightarrow \pi^*$          | 4.85 <sup>b</sup> | 4.52 | 4.52    | 4.73 | 4.68 | 4.68    | 4.83 |
| Thymine: 2 1A'', $n \rightarrow \pi^*$          | 6.27 <sup>b</sup> | 5.47 | 5.47    | 5.80 | 5.69 | 5.69    | 6.00 |
| Uracil: 2 1A', $\pi \rightarrow \pi^*$          | 5.25 <sup>a</sup> | 4.88 | 4.88    | 5.17 | 4.90 | 4.90    | 5.14 |
| Uracil: 3 1A', $\pi \rightarrow \pi^*$          | 6.26 <sup>a</sup> | 5.68 | 5.68    | 6.05 | 5.86 | 5.86    | 6.08 |
| Uracil: 4 1A', $\pi \rightarrow \pi^*$          | 6.70 <sup>a</sup> | 5.85 | 5.85    | 6.20 | 5.97 | 5.97    | 6.26 |
| Uracil: 1 1A'', $n \rightarrow \pi^*$           | 5.00 <sup>a</sup> | 4.45 | 4.45    | 4.67 | 4.64 | 4.64    | 4.80 |
| Uracil: 2 1A'', $n \rightarrow \pi^*$           | 6.10 <sup>a</sup> | 5.43 | 5.43    | 5.76 | 5.65 | 5.65    | 5.96 |
| Uracil: 3 1A'', $n \rightarrow \pi^*$           | 6.56 <sup>a</sup> | 6.09 | 6.09    | 6.45 | 6.10 | 6.10    | 6.50 |
| Adenine: 2 1A', $\pi \rightarrow \pi^*$         | 5.04 <sup>b</sup> | 4.23 | 4.23    | 4.45 | 4.33 | 4.33    | 4.50 |
| Adenine: 3 1A', $\pi \rightarrow \pi^*$         | 5.23 <sup>b</sup> | 4.79 | 4.79    | 4.94 | 4.90 | 4.90    | 4.98 |
| Adenine: 1 1A'', $n \rightarrow \pi^*$          | 5.28 <sup>b</sup> | 4.60 | 4.60    | 4.73 | 4.62 | 4.62    | 4.87 |
| Adenine: 2 1A'', $n \rightarrow \pi^*$          | 5.84 <sup>b</sup> | 5.05 | 5.05    | 5.15 | 5.16 | 5.16    | 5.28 |

a M.R.Silva-Junior, M. Schreiber, S.P.A. Sauer, and W. Thiel, J.Chem.Phys. 133, 174318 (2010). b P.G. Szalay, T. Watson, A. Perera, V.F. Lorich, and R.J. Bartlett, J.Phys.Chem.A 116, 6702 (2012).

Table S86: C=O and C–H Bond Lengths (Å),  $\angle$ HCH Bond Angles (degree), and Out-of-Plane Bending Angles  $\theta$  (degree) Calculated with the TDDFT/B3LYP, CC2, OM $x$ /MRCI, OM $x$ -D3T/MRCI, and ODM $x$ /MRCI Methods for Two States of Formaldehyde in the Ex-Geom Set. Available Experimental Values Are Also Given for Comparison<sup>a</sup>

|              | Exp.  | TDDFT | CC2   | OM2   | OM2-D3T | ODM2  | OM3   | OM3-D3T | ODM3  |
|--------------|-------|-------|-------|-------|---------|-------|-------|---------|-------|
| $1^1n\pi^*$  |       |       |       |       |         |       |       |         |       |
| C=O          | 1.323 | 1.296 | 1.361 | 1.279 | 1.279   | 1.292 | 1.276 | 1.276   | 1.285 |
| C–H          | 1.098 | 1.095 | 1.089 | 1.113 | 1.113   | 1.111 | 1.126 | 1.126   | 1.119 |
| $\angle$ HCH | 118.4 | 117.2 | 121.0 | 113.9 | 113.9   | 114.3 | 107.9 | 107.9   | 109.9 |
| $\theta$     | 34.0  | 31.0  | 27.8  | 27.3  | 27.3    | 31.0  | 31.2  | 31.2    | 29.7  |
| $1^3n\pi^*$  |       |       |       |       |         |       |       |         |       |
| C=O          | 1.307 | 1.298 | 1.343 | 1.261 | 1.261   | 1.275 | 1.254 | 1.254   | 1.267 |
| C–H          | 1.084 | 1.102 | 1.093 | 1.148 | 1.148   | 1.138 | 1.160 | 1.160   | 1.139 |
| $\angle$ HCH | 117.9 | 112.1 | 117.6 | 108.1 | 108.1   | 109.8 | 101.7 | 101.7   | 105.8 |
| $\theta$     | 41.1  | 45.9  | 39.1  | 40.2  | 40.2    | 40.7  | 38.9  | 38.9    | 36.4  |

<sup>a</sup> Available OM $x$ /MRCI, TDDFT, CC2, and experimental values are taken from Ref. S13.



Table S87: C=O Bond Lengths (Å) Calculated with the TDDFT/B3LYP, CC2, OM $x$ /MRCI, OM $x$ -D3T/MRCI, and ODM $x$ /MRCI Methods for Various States of Acetaldehyde, Acetone, and Formaldehyde in the ExGeom Set. Available Experimental Values Are Also Given for Comparison<sup>a</sup>

| Species      | State                   | Exp.  | TDDFT | CC2   | OM2   | OM2-D3T | ODM2  | OM3   | OM3-D3T | ODM3  |
|--------------|-------------------------|-------|-------|-------|-------|---------|-------|-------|---------|-------|
| acetaldehyde | <sup>1</sup> $n\pi^*$   | 1.32  | 1.304 | 1.387 | 1.290 | 1.290   | 1.303 | 1.298 | 1.298   | 1.304 |
|              | <sup>3</sup> $n\pi^*$   | —     | 1.305 | 1.364 | 1.270 | 1.270   | 1.283 | 1.276 | 1.276   | 1.285 |
|              | <sup>3</sup> $\pi\pi^*$ | —     | —     | 1.478 | 1.414 | 1.414   | 1.421 | 1.416 | 1.415   | 1.422 |
| acetone      | <sup>1</sup> $n\pi^*$   | —     | 1.310 | 1.420 | 1.291 | 1.291   | 1.304 | 1.310 | 1.309   | 1.316 |
|              | <sup>3</sup> $n\pi^*$   | —     | 1.312 | 1.387 | 1.266 | 1.266   | 1.277 | 1.284 | 1.283   | 1.291 |
|              | <sup>3</sup> $\pi\pi^*$ | —     | —     | 1.489 | 1.414 | 1.414   | 1.422 | 1.439 | 1.439   | 1.432 |
| formaldehyde | <sup>1</sup> $n\pi^*$   | 1.323 | 1.296 | 1.361 | 1.279 | 1.279   | 1.292 | 1.276 | 1.276   | 1.285 |
|              | <sup>3</sup> $n\pi^*$   | 1.307 | 1.298 | 1.343 | 1.261 | 1.261   | 1.275 | 1.254 | 1.254   | 1.267 |
|              | <sup>3</sup> $\pi\pi^*$ | 1.423 | —     | 1.469 | 1.398 | 1.398   | 1.410 | 1.424 | 1.424   | 1.420 |

<sup>a</sup> Available OM $x$ /MRCI, TDDFT, CC2, and experimental values are taken from Ref. S13.

Table S88: Out-of-Plane Bending Angles (degree) Formed by the C=O Bond and the HCC, CCC, and HCH Planes for Various States of Acetaldehyde, Acetone, and Formaldehyde in the ExGeom Set, Respectively. Geometries Optimized at the TDDFT/B3LYP, CC2, OM*x*/MRCI, OM*x*-D3T/MRCI, and ODM*x*/MRCI Levels of Theory. Available Experimental Values Are Also Given for Comparison<sup>a</sup>

| Species      | State                    | Exp. | TDDFT | CC2  | OM2  | OM2-D3T | ODM2 | OM3  | OM3-D3T | ODM3 |
|--------------|--------------------------|------|-------|------|------|---------|------|------|---------|------|
| acetaldehyde | <sup>1</sup> <i>nπ</i> * | ≈ 26 | 31.3  | 31.4 | 31.4 | 31.4    | 32.7 | 31.8 | 31.9    | 28.4 |
|              | <sup>3</sup> <i>nπ</i> * | 42.2 | 41.6  | 38.6 | 40.2 | 40.3    | 40.4 | 38.2 | 38.3    | 34.7 |
|              | <sup>3</sup> <i>ππ</i> * | —    | —     | 34.2 | 39.1 | 39.2    | 39.3 | 37.4 | 37.5    | 35.0 |
| acetone      | <sup>1</sup> <i>nπ</i> * | —    | 33.5  | 35.6 | 36.0 | 36.1    | 35.7 | 34.4 | 34.6    | 31.4 |
|              | <sup>3</sup> <i>nπ</i> * | —    | 39.4  | 39.9 | 44.1 | 44.2    | 43.4 | 40.2 | 40.4    | 37.3 |
|              | <sup>3</sup> <i>ππ</i> * | —    | —     | 38.6 | 44.1 | 44.2    | 43.9 | 41.7 | 42.0    | 38.2 |
| formaldehyde | <sup>1</sup> <i>nπ</i> * | 34.0 | 31.0  | 27.8 | 27.3 | 27.3    | 31.0 | 31.2 | 31.2    | 29.7 |
|              | <sup>3</sup> <i>nπ</i> * | 41.1 | 45.9  | 29.1 | 40.2 | 40.2    | 40.7 | 38.9 | 38.9    | 36.4 |
|              | <sup>3</sup> <i>ππ</i> * | —    | —     | 28.5 | 34.7 | 34.7    | 36.6 | 36.1 | 36.1    | 33.8 |

<sup>a</sup> Available OM*x*/MRCI, TDDFT, CC2, and experimental values are taken from Ref. S13.

Table S89:  $\angle$ CCH Bond Angles (degree) Calculated with the TDDFT/B3LYP, CC2, OM*x*/MRCI, OM*x*-D3T/MRCI, and ODM*x*/MRCI Methods for Various States of Acetylene in the ExGeom Set<sup>a</sup>

| State                         | TDDFT | CC2   | OM2   | OM2-D3T | ODM2  | OM3   | OM3-D3T | ODM3  |
|-------------------------------|-------|-------|-------|---------|-------|-------|---------|-------|
| 1 <sup>1</sup> A <sub>2</sub> | 132.3 | 132.7 | 147.2 | 147.2   | 147.4 | 149.1 | 149.0   | 150.3 |
| 2 <sup>1</sup> A <sub>2</sub> | 174.3 | 171.6 | 180.0 | 180.0   | 180.0 | 180.0 | 180.0   | 180.0 |
| 1 <sup>1</sup> B <sub>2</sub> | 143.7 | 142.0 | 139.5 | 139.4   | 139.6 | 150.7 | 150.6   | 154.1 |
| 1 <sup>3</sup> A <sub>2</sub> | —     | 130.4 | 144.5 | 144.5   | 143.9 | 144.6 | 144.5   | 145.9 |
| 2 <sup>3</sup> A <sub>2</sub> | 166.0 | 167.3 | 180.0 | 180.0   | 180.0 | 180.0 | 180.0   | 180.0 |
| 1 <sup>3</sup> B <sub>2</sub> | —     | 126.9 | 133.8 | 133.8   | 133.6 | 133.9 | 133.7   | 135.0 |
| 1 <sup>1</sup> A <sub>u</sub> | 122.6 | 122.1 | 125.0 | 125.0   | 124.3 | 125.1 | 125.1   | 127.2 |
| 2 <sup>1</sup> A <sub>u</sub> | 175.2 | 171.1 | 170.0 | 170.0   | 169.7 | 171.7 | 171.7   | 172.0 |
| 1 <sup>1</sup> B <sub>u</sub> | 150.2 | 147.0 | 143.2 | 143.2   | 142.0 | 145.4 | 145.3   | 146.1 |
| 1 <sup>3</sup> A <sub>u</sub> | 116.9 | 120.5 | 123.7 | 123.7   | 122.9 | 122.6 | 122.6   | 124.7 |
| 2 <sup>3</sup> A <sub>u</sub> | 162.9 | 164.7 | 163.8 | 163.8   | 163.2 | 164.1 | 164.1   | 164.4 |
| 1 <sup>3</sup> B <sub>u</sub> | 129.4 | 131.2 | 138.3 | 138.3   | 137.0 | 135.9 | 135.9   | 136.6 |
| 2 <sup>3</sup> B <sub>u</sub> | 156.5 | 153.8 | 150.5 | 150.5   | 148.5 | 152.8 | 152.8   | 153.1 |

<sup>a</sup> Available OM*x*/MRCI, TDDFT and CC2 values are taken from Ref. S13.

Table S90: Out-of-Plane Bending Angles (degree) Formed by the C–N Bond and the NH<sub>2</sub> Plane Calculated with the TDDFT/B3LYP, CC2, OM $x$ /MRCI, OM $x$ -D3T/MRCI, and ODM $x$ /MRCI Methods for Various States of 9*H*-Adenine, Aniline, Cytosine, and 9*H*-Guanine in the ExGeom Set<sup>a</sup>

| Species             | State                   | TDDFT | CC2  | OM2  | OM2-D3T | ODM2 | OM3  | OM3-D3T | ODM3 |
|---------------------|-------------------------|-------|------|------|---------|------|------|---------|------|
| 9 <i>H</i> -adenine | <sup>1</sup> $n\pi^*$   | 39.6  | 39.3 | 0.4  | 0.4     | 1.2  | 4.6  | 4.6     | 3.0  |
| aniline             | <sup>1</sup> $\pi\pi^*$ | 5.9   | 27.0 | 0.0  | 0.0     | 0.0  | 0.0  | 0.0     | 0.0  |
|                     | <sup>3</sup> $\pi\pi^*$ | —     | 37.1 | 13.4 | 13.8    | 11.8 | 16.0 | 16.5    | 20.9 |
| cytosine            | <sup>1</sup> $n\pi^*$   | 32.4  | 47.8 | 0.0  | 0.0     | 0.0  | 0.0  | 0.0     | 0.0  |
|                     | <sup>1</sup> $\pi\pi^*$ | 28.6  | 44.3 | 0.0  | 0.0     | 0.0  | 0.0  | 0.0     | 0.0  |
| 9 <i>H</i> -guanine | <sup>1</sup> $\pi\pi^*$ | 34.9  | 45.8 | 11.4 | 11.2    | 5.2  | 16.4 | 16.6    | 1.6  |

<sup>a</sup> Available OM $x$ /MRCI, TDDFT, and CC2 are taken from Ref. S13.

Table S91: Benchmark Results for the SKF Set. 0–0 Transition Energies (eV)

| Molecule                                 | Ref.              | OM2  | OM2-D3T        | ODM2           | OM3            | OM3-D3T        | ODM3           |
|------------------------------------------|-------------------|------|----------------|----------------|----------------|----------------|----------------|
| 1,6-epoxy-10-annulene: 1 1B1             | 3.07 <sup>a</sup> | 3.22 | 3.22           | 3.33           | 3.24           | 3.25           | 3.42           |
| 2-cyclopenten-1-one: 2 1A                | 3.47 <sup>a</sup> | 3.49 | 3.49           | — <sup>b</sup> | 3.52           | 3.52           | 3.56           |
| 7-azaindole: 2 1A                        | 4.41 <sup>a</sup> | 3.97 | 3.97           | 4.08           | 4.00           | 4.00           | 4.05           |
| β-dinaphthyleneoxide: 2 1A               | 3.73 <sup>a</sup> | 3.93 | 3.93           | 3.97           | 3.96           | 3.95           | 3.97           |
| acetaldehyde: 2 1A                       | 3.76 <sup>a</sup> | 3.65 | 3.65           | 3.77           | 3.70           | 3.70           | 3.80           |
| acetone: 2 1A                            | 3.83 <sup>a</sup> | 3.81 | 3.81           | 3.92           | 3.84           | 3.84           | 3.93           |
| acrolein: 1 1A <sup>''</sup>             | 3.29 <sup>a</sup> | 3.68 | 3.67           | 3.75           | 3.70           | 3.70           | 3.78           |
| acrolein: 1 3A <sup>''</sup>             | 3.11 <sup>a</sup> | 3.52 | 3.52           | 3.61           | 3.55           | 3.55           | 3.64           |
| aminobenzonitrile: 1 1B1                 | 4.33 <sup>a</sup> | 3.89 | 3.89           | 4.05           | 3.81           | 3.81           | 3.98           |
| aniline: 2 1A                            | 4.39 <sup>a</sup> | 3.97 | 3.97           | 4.12           | 3.86           | 3.86           | 4.03           |
| anisole: 2 1A                            | 4.68 <sup>a</sup> | 4.15 | 4.15           | 4.28           | 4.16           | 4.17           | 4.27           |
| anthracene: 1 1B2u                       | 3.51 <sup>a</sup> | 3.87 | 3.87           | 3.92           | 3.88           | 3.88           | 3.92           |
| azulene: 1 1B1                           | 1.81 <sup>a</sup> | 1.55 | 1.55           | 1.60           | 1.53           | 1.53           | 1.56           |
| benzaldehyde: 2 1A <sup>'</sup>          | 4.50 <sup>a</sup> | 4.18 | 4.19           | 4.28           | 4.19           | 4.19           | 4.26           |
| benzaldehyde: 1 1A <sup>''</sup>         | 3.43 <sup>a</sup> | 3.75 | 3.75           | 3.79           | 3.70           | 3.70           | 3.75           |
| benzaldehyde 1 3A <sup>''</sup>          | 3.21 <sup>a</sup> | 3.54 | 3.54           | 3.59           | 3.47           | 3.47           | 3.55           |
| benzene: 1 1B1u                          | 4.88 <sup>a</sup> | 4.37 | 4.37           | 4.48           | 4.35           | 4.36           | 4.43           |
| benzonitrile: 1 1B1                      | 4.68 <sup>a</sup> | 4.24 | 4.24           | 4.35           | 4.24           | 4.24           | 4.31           |
| benzophenone ketyl radical: 2 2A         | 2.36 <sup>a</sup> | 2.72 | 2.70           | 2.74           | — <sup>b</sup> | — <sup>b</sup> | — <sup>b</sup> |
| biphenyl: 1 1B1u                         | 4.52 <sup>a</sup> | 4.83 | 4.83           | 4.91           | 4.85           | 4.85           | 4.91           |
| biphenylene: 1 1B3u                      | 3.61 <sup>a</sup> | 3.69 | 3.69           | 3.78           | 3.66           | 3.66           | 3.73           |
| acetylene: 2 1A                          | 5.32 <sup>a</sup> | 5.22 | 5.22           | 4.88           | 4.94           | 4.94           | 5.05           |
| formaldehyde: 2 1A                       | 3.58 <sup>a</sup> | 3.42 | 3.42           | 3.50           | 3.46           | 3.46           | 3.56           |
| formaldehyde: 1 3A                       | 3.22 <sup>a</sup> | 3.12 | 3.12           | 3.21           | 3.14           | 3.14           | 3.25           |
| cinnoline: 1 1A <sup>''</sup>            | 2.90 <sup>a</sup> | 3.35 | 3.35           | 3.28           | 3.18           | 3.19           | 3.31           |
| cynoacetylene: 2 1A <sup>'</sup>         | 4.90 <sup>a</sup> | 5.55 | 5.55           | 4.95           | 5.60           | 5.60           | 5.69           |
| cyclohexadienyl radical: 2 2A            | 2.33 <sup>a</sup> | 2.15 | 2.15           | 2.21           | 2.12           | 2.13           | 2.16           |
| 2,3-diazabicyclo[2,2,1]hept-2-ene: 2 1A  | 3.76 <sup>a</sup> | 3.61 | 3.61           | 3.48           | — <sup>b</sup> | — <sup>b</sup> | — <sup>b</sup> |
| 4-(dimethylamino)-4'-cyanostilbene: 2 1A | 3.43 <sup>a</sup> | 3.78 | 3.78           | — <sup>b</sup> | 3.69           | 3.69           | 3.81           |
| dimethylaminobenzonitrile: 1 1B          | 4.14 <sup>a</sup> | 3.92 | 3.92           | 4.06           | 3.80           | 3.80           | 3.99           |
| N,N-dimethyl-p-phenylenediamine: 2 1A    | 3.74 <sup>a</sup> | 4.65 | 4.65           | 4.86           | 4.46           | 4.46           | 4.76           |
| fluorene: 2 1A <sup>'</sup>              | 4.37 <sup>a</sup> | 4.24 | 4.24           | 4.35           | 4.22           | 4.22           | 4.29           |
| glyoxal: 1 1Au                           | 2.78 <sup>a</sup> | 3.00 | 3.00           | 3.10           | 3.00           | 3.00           | 3.11           |
| hydrogen cyanide: 1 1A <sup>''</sup>     | 6.61 <sup>a</sup> | 6.78 | 6.78           | 6.81           | 6.31           | 6.31           | 6.25           |
| formic acid: 2 1A                        | 4.74 <sup>a</sup> | 4.36 | 4.36           | 4.49           | 4.39           | 4.39           | 4.49           |
| hexatriene: 1 1Bu                        | 5.06 <sup>a</sup> | 5.06 | 5.07           | 5.12           | 5.09           | 5.09           | 5.13           |
| hydroquinone: 1 1Bu                      | 4.31 <sup>a</sup> | 3.85 | 3.85           | 4.01           | 3.91           | 3.91           | 4.04           |
| indole: 2 1A <sup>'</sup>                | 4.52 <sup>a</sup> | 3.95 | 3.95           | 4.07           | 3.90           | 3.90           | 4.02           |
| methyl-4-hydroxycinnamate: 2 1A          | 4.12 <sup>a</sup> | 3.94 | 3.94           | 4.09           | 3.95           | 3.95           | — <sup>b</sup> |
| naphthalene: 1 1B2u                      | 4.09 <sup>a</sup> | 4.65 | 4.65           | 4.72           | 4.66           | 4.66           | 4.71           |
| octatetraene: 1 1Bu                      | 4.51 <sup>a</sup> | 4.51 | 4.51           | 4.55           | 4.52           | 4.52           | 4.56           |
| o-cyanobenzyl radical: 2 2A              | 2.56 <sup>a</sup> | 2.37 | 2.37           | 2.45           | 2.37           | 2.37           | 2.43           |
| oxalylfluoride: 1 1Au                    | 4.12 <sup>a</sup> | 4.06 | 4.06           | 4.18           | 4.22           | 4.22           | 4.33           |
| benzoquinone: 1 1B1g                     | 4.14 <sup>a</sup> | 4.24 | 4.24           | 4.22           | 4.26           | 4.26           | 4.23           |
| benzoquinone: 1 1B2g                     | 2.64 <sup>a</sup> | 2.66 | 2.66           | 2.70           | 2.61           | 2.60           | 2.63           |
| p-diethynylbenzene: 1 1B2u               | 4.40 <sup>a</sup> | 4.72 | 4.72           | 4.81           | 4.71           | 4.71           | 4.78           |
| p-phenylenediamine: 2 1A                 | 3.87 <sup>a</sup> | 3.53 | 3.53           | 3.71           | 3.35           | 3.35           | 3.58           |
| phenol: 2 1A                             | 4.67 <sup>a</sup> | 4.83 | 4.83           | 4.97           | 4.87           | 4.87           | 4.98           |
| porphyrin: 1 1B1u                        | 2.08 <sup>a</sup> | 1.96 | 1.97           | 2.01           | 2.03           | 1.99           | 1.98           |
| propynal: 2 1A                           | 3.33 <sup>a</sup> | 3.49 | 3.49           | 3.56           | 3.50           | 3.50           | 3.55           |
| pyrene: 2 1A                             | 3.46 <sup>a</sup> | 3.36 | — <sup>b</sup> | — <sup>b</sup> | 3.48           | 3.48           | 3.54           |
| pyridine: 2 1A                           | 4.50 <sup>a</sup> | 4.31 | 4.31           | 4.44           | 4.08           | 4.08           | 4.27           |
| pyridone lactam: 3 1A                    | 3.82 <sup>a</sup> | 4.03 | 4.03           | 4.17           | 4.16           | 4.16           | 4.24           |
| pyridone lactim: 1 1A <sup>''</sup>      | 4.64 <sup>a</sup> | 4.68 | 4.69           | 4.74           | 4.56           | 4.56           | 4.62           |
| pyrimidine: 2 1A                         | 4.02 <sup>a</sup> | 4.04 | 4.04           | 4.13           | 3.83           | 3.83           | 4.06           |
| pyrimidine: 4 1A                         | 5.01 <sup>a</sup> | 4.71 | 4.71           | 4.82           | 4.90           | 4.90           | 4.81           |
| quinoline: 1 1A <sup>''</sup>            | 4.12 <sup>a</sup> | 3.95 | 3.95           | 3.97           | 3.80           | 3.80           | 3.82           |
| quinoline: 1 3A <sup>'</sup>             | 2.96 <sup>a</sup> | 2.75 | 2.75           | 2.82           | 2.76           | 2.77           | 2.79           |
| quinoxaline: 2 1A1                       | 4.06 <sup>a</sup> | 3.79 | 3.79           | 3.86           | 3.87           | 3.88           | 3.86           |
| quinoxaline: 2 1A                        | 3.51 <sup>a</sup> | 3.39 | 3.39           | 3.36           | 3.40           | 3.41           | 3.35           |
| quinoxaline: 1 3A <sup>'</sup>           | 2.84 <sup>a</sup> | 2.81 | 2.81           | 2.85           | 2.85           | 2.86           | 2.85           |
| styrene: 2 1A                            | 4.45 <sup>a</sup> | 4.15 | 4.15           | 4.25           | 4.13           | 4.14           | 4.21           |
| syn-coumarin 153: 2 1A                   | 3.33 <sup>a</sup> | 3.68 | 3.68           | 3.83           | 3.49           | 3.49           | 3.63           |

... continued on next page ...

Table S91: ... continued from previous page ...

| Molecule            | Ref.              | OM2  | OM2-D3T | ODM2 | OM3  | OM3-D3T | ODM3 |
|---------------------|-------------------|------|---------|------|------|---------|------|
| terylene: 2 1A'     | 2.53 <sup>a</sup> | 2.83 | 2.83    | 2.87 | 2.83 | 2.83    | 2.87 |
| s-tetrazine: 1 1B3u | 2.33 <sup>a</sup> | 2.84 | 2.84    | 2.64 | 2.92 | 2.92    | 2.74 |
| toluene: 1 1A''     | 4.81 <sup>a</sup> | 4.28 | 4.29    | 4.40 | 4.26 | 4.27    | 4.35 |
| stilbene: 2 1A      | 4.09 <sup>a</sup> | 4.37 | 4.37    | 4.43 | 4.39 | 4.38    | 4.44 |
| vinyl radical: 2 2A | 2.47 <sup>a</sup> | 2.38 | 2.38    | 2.35 | 2.49 | 2.49    | 2.51 |

a R. Send, M. Kuehn, and F. Furche, *J.Chem.Theory Comput.* 7, 2376 (2011). Experimental data are back-corrected with  $\Delta$ ZPVE values from (TD)DFT calculations for reasons described in D. Tuna, Y. Lu, A. Koslowski, W. Thiel, *J.Chem.Theory Comput.* 12, 4400 (2016). b Calculation could not be converged.

## References

- (S1) Levenberg, K. A Method for the Solution of Certain Non-Linear Problems in Least Squares. *Quart. Appl. Math.* **1944**, *2*, 164–168.
- (S2) Marquardt, D. W. An Algorithm for Least-Squares Estimation of Nonlinear Parameters. *SIAM J. Appl. Math.* **1963**, *11*, 431–441.
- (S3) Fletcher, R. *Practical Methods of Optimization*, 2nd ed.; John Wiley & Sons, Ltd: New York, NY, USA, 1987.
- (S4) Nelder, J. A.; Mead, R. A Simplex Method for Function Minimization. *Computer J.* **1965**, *7*, 308–313.
- (S5) Kaelo, P.; Ali, M. M. Some Variants of the Controlled Random Search Algorithm for Global Optimization. *J. Optim. Theory Appl.* **2006**, *130*, 253–264.
- (S6) Jones, D. R.; Perttunen, C. D.; Stuckman, B. E. Lipschitzian Optimization Without the Lipschitz Constant. *J. Optim. Theory Appl.* **1993**, *79*, 157–181.
- (S7) Gablonsky, J.; Kelley, C. A Locally-Biased Form of the DIRECT Algorithm. *J. Global Optim.* **2001**, *21*, 27–37.
- (S8) Runarsson, T. P.; Yao, X. Search Biases in Constrained Evolutionary Optimization. *IEEE Trans. Syst. Man Cybern. C, Appl. Rev.* **2005**, *35*, 233–243.
- (S9) Brent, R. P. *Algorithms for Minimization Without Derivatives*; Prentice-Hall, 1973.
- (S10) Rowan, T. Functional Stability Analysis of Numerical Algorithms. Ph.D. thesis, Department of Computer Sciences, University of Texas at Austin, 1990.
- (S11) Johnson, S. G. The Nlopt Nonlinear-Optimization Package. <http://ab-initio.mit.edu/nlopt>, accessed on December 18, 2018.

- (S12) Dral, P. O.; Wu, X.; Spörkel, L.; Koslowski, A.; Weber, W.; Steiger, R.; Scholten, M.; Thiel, W. Semiempirical Quantum-Chemical Orthogonalization-Corrected Methods: Theory, Implementation, and Parameters. *J. Chem. Theory Comput.* **2016**, *12*, 1082–1096.
- (S13) Tuna, D.; Lu, Y.; Koslowski, A.; Thiel, W. Semiempirical Quantum-Chemical Orthogonalization-Corrected Methods: Benchmarks of Electronically Excited States. *J. Chem. Theory Comput.* **2016**, *12*, 4400–4422.
